# Supplementary material for: Microbiota functional activity biosensors for characterizing nutrient metabolism in vivo
Source: eLife. 2021 Mar 8;10:e64478. doi: 10.7554/eLife.64478 (PMC7939548; doi:10.7554/eLife.64478)
Supplement: Supplementary file 1. — (A) Initial procedure that yielded eight fractions during sequential extraction. (B) Glycosyl-linkage analysis of PFABN and SBABN. (C) Summary data of Bacteroides growth in defined minimal medium supplemented with glucose, PFABN, and SBABN. [file elife-64478-supp1.xlsx]

## Sheet: Table 1a
Supplementary File 1: Characterization of fractions isolated from pea fiber (related to Figure 1).
(a) Initial procedure that yielded 8 fractions during sequential extraction
Fraction	Fraction	Yield (mg)	% Yield	% Protein (BCA; mg/mg)	% Carbohydrate (Phenol/Sulfuric Acid; mg/mg)	HPLC Peaks	Size (kDa)
1	Oxalate precipitate	29.3	1.465	5.8008	17.5071	1	>200
2	Oxalate soluble	17.9	0.895	2.93227	6.98511	1	>200
3	Carbonate precipitate	37.6	1.88	11.1394	7.13859	1	>200
4	Carbonate soluble	40.1	2.005	41.7371	15.0514	1	>200
5	1M KOH insoluble	99	4.95	3.6494	102.468	1	>200
6	1M KOH soluble	29.4	1.47	22.7729	38.9263	1	>200
7	4M KOH insoluble	99.5	4.975	0.860558	77.0068	1	>200
8	4M KOH soluble	181.2	9.06	1.9761	80.7244	1	>200
	All material resuspended at 1 mg/mL in water

## Sheet: Table 1b
Supplementary File 1: Characterization of fractions isolated from pea fiber (related to Figure 1).
(b) Glycosyl linkage analysis of PFABN and SBABN.
		Area % of Detected linkage
	Glycosl linkage	Pea fiber arabinan	Sugar beet arabinan
Arabinose	t-Ara(f)	19.21	21.99
	t-Arap(p)	0.13	0.2
	3-Ara(f)	0.34	1.39
	4-Ara(p)/5-Ara(f)	21.59	24.29
	3,4-Ara(p)/3,5-Ara(f)	2.19	13.57
	2,4-Ara(p)/2,5Ara(f)	12.96	2.47
	2,3,4-Ara(p)/2,3,5-Ara(f)	9.36	4.49
	Sum total arabinose	65.78	68.4
Galactose	t-Gal(p)	2.91	3.44
	3-Gal(p)	1.89	1.47
	2-Gal(p)	0.65	0
	4-Gal(p)	7.16	14.05
	6-Gal(p)	0.34	1.8
	4,6-Gal(p)	0.54	0.36
	3,6-Gal(p)	0.28	2.02
	3,4,6-Gal(p)	0.02	0.15
	2,3,6-Gal(p)	0	0.05
	Sum total galactose	13.79	23.34
Xylose	t-Xyl(p)	2.63	0
	4-Xyl(p)	6.47	0
	3,4-Xyl(p)	0.9	0.4
	2,3,4-Xyl(p)	0	0.02
	Sum total xylose	10	0.42
Rhamnose	t-Rha(p)	0.15	0.44
	2-Rha(p)	1.29	2.62
	3-Rha(p)	0.1	0.48
	2,3-Rha(p)	0	0.07
	2,4-Rha(p)	2.69	3.53
	2,3,4-Rha(p)	0.33	0.29
	Sum total rhamnose	4.56	7.43
Glucose	t-Glc(p)	0.16	0
	4-Glc(p)	0.07	0.14
	2,4-Glc(p)	0.22	0.19
	4,6-Glc(p)	4.34	0.01
	Sum total glucose	4.79	0.34
Mannose	t-Man(p)	0.36	0
	3,6-Man(p)	0.03	0
	2,6-Man(p)	0.05	0
	Sum total mannose	0.44	0
Other	t-Fuc(p)	0.46	0.04
	3'-Api(f)	0.17	0.02

## Sheet: Table 1c
Supplementary File 1: Characterization of fractions isolated from pea fiber (related to Figure 1).
(c) Summary data of Bacteroides growth in defined minimal medium supplemented with glucose, PFABN, and SBABN.
	Data summarizing growth curves
	B. ovatus ATCC 8483		B. cellulosilyticus WH2		B. thetaiotaomicron VPI-5482		B. vulgatus ATCC 8482
Growth Substrate	Maximum growth rate (∆OD600/hr)	Maximum growth (OD600)	Maximum growth rate (∆OD600/hr)	Maximum growth (OD600)	Maximum growth rate (∆OD600/hr)	Maximum growth (OD600)	Maximum growth rate (∆OD600/hr)	Maximum growth (OD600)
Glucose	0.137 ± 0.013	0.93 ± 0.13	0.112 ± 0.016	0.72 ± 0.05	0.070 ± 0.004	0.75 ± 0.08	0.024 ± 0.004	0.48 ± 0.04
Pea fiber arabinan (PFABN)	0.033 ± 0.006	0.23 ± 0.01	0.078 ± 0.018	0.47 ± 0.01	0.041 ± 0.002	0.40 ± 0.02	0.038 ± 0.009	0.43 ± 0.01
Sugar beet arabinan (SBABN)	0.025 ± 0.001	0.16 ± 0.01	0.082 ± 0.009	0.45 ± 0.01	0.071 ± 0.019	0.48 ± 0.01	0.053 ± 0.022	0.54 ± 0.01
	Values shown represent mean ± s.d. (n = 4)
	Adjusted p value (ANOVA with Tukey's HSD, FDR-corrected)
	B. ovatus ATCC 8483		B. cellulosilyticus WH2		B. thetaiotaomicron VPI-5482		B. vulgatus ATCC 8482
Comparison	Maximum growth rate	Maximum growth	Maximum growth rate	Maximum growth	Maximum growth rate	Maximum growth	Maximum growth rate	Maximum growth
Glucose vs PFABN	7.32e-08	9.82e-07	0.0279	1.44e-06	0.011	7.47e-06	0.359	0.0514
Glucose vs SBABN	3.78e-08	4.84e-07	0.046	6.96e-07	0.994	5.9e-05	0.0383	0.0137
PFABN vs SBABN	0.446	0.513	0.945	0.526	0.00941	0.106	0.329	0.000329
