# Supplementary material for: Microbiota functional activity biosensors for characterizing nutrient metabolism in vivo
Source: eLife. 2021 Mar 8;10:e64478. doi: 10.7554/eLife.64478 (PMC7939548; doi:10.7554/eLife.64478)
Supplement: Supplementary file 2. — (A,B) COPRO-Seq results obtained from treatment groups described in Figure 2 (mean ± s.d.). (C) COPRO-Seq results obtained from treatment groups described in Figure 5 (mean ± s.d.). [file elife-64478-supp2.xlsx]

## Sheet: Table 2a
Supplementary File 2: Effects of pea fiber, PFABN and SBABN supplementation of the HiSF-LoFV diet on the absolute abundances of members of the defined community in gnotobiotic mice (related to Figs. 2 and 5).
(a) COPRO-Seq results obtained from treatment groups described in Figure 2 (Experiment 1)
(i) Community configuration (mean ± SD)
	Absolute Abundance (10^9 genome equivalents per gram feces)																Absolute Abundance (10^9 genome equivalents per gram cecal material)				Percent Abundance
Experimental day	2	Day 2	Day 2	Day 2	6	Day 6	Day 6	Day 6	8	Day 8	Day 8	Day 8	11	Day 11	Day 11	Day 11	12	Day 12	Day 12	Day 12	12	Day 12	Day 12	Day 12
Bacteria	HiSF-LoFV	PF	PFABN	SBABN	HiSF-LoFV	PF	PFABN	SBABN	HiSF-LoFV	PF	PFABN	SBABN	HiSF-LoFV	PF	PFABN	SBABN	HiSF-LoFV	PF	PFABN	SBABN	HiSF-LoFV	PF	PFABN	SBABN
Bacteroides ovatus ATCC 8483	4.85 ± 0.666	5.5 ± 0.922	4.67 ± 0.25	6.21 ± 1	4.47 ± 0.93	13.5 ± 2	10.5 ± 2.35	7.44 ± 1.63	4.44 ± 0.781	11.6 ± 0.983	9.45 ± 2.44	5.89 ± 0.818	4.31 ± 0.653	12.6 ± 1.72	10.4 ± 1.32	6.74 ± 0.415	2.14 ± 0.252	6.32 ± 1.33	4.99 ± 0.725	2.98 ± 0.553	9.51 ± 0.821	18.3 ± 1.44	16.7 ± 0.733	8.79 ± 0.946
Bacteroides cellulosilyticus WH2	13.7 ± 2.28	14.4 ± 2.78	13.6 ± 0.901	15.2 ± 0.885	9.46 ± 1.53	22.5 ± 2.83	12.3 ± 3.2	13.5 ± 3.58	9.64 ± 1.22	19.8 ± 3.29	10.2 ± 3.82	12 ± 0.734	10.4 ± 2.31	20.4 ± 2.45	13 ± 1.48	12.6 ± 3.69	5.07 ± 0.434	8.39 ± 3	6.12 ± 1.03	5.85 ± 2.46	22.6 ± 1.15	24.9 ± 9.33	20.4 ± 1.49	16.6 ± 3.08
Bacteroides thetaiotaomicron 7330	6.21 ± 1.71	7.51 ± 1.57	7.78 ± 1.15	7.7 ± 0.732	0.0201 ± 0.00231	0.24 ± 0.16	0.095 ± 0.02	0.0736 ± 0.032	0.0146 ± 0.00115	0.0276 ± 0.00436	0.0207 ± 0.00711	0.0261 ± 0.00333	0.0133 ± 0.00296	0.0268 ± 0.00691	0.0235 ± 0.00367	0.0295 ± 0.00545	0.00624 ± 0.000807	0.0106 ± 0.00347	0.00785 ± 0.00135	0.0114 ± 0.00248	0.0277 ± 0.00205	0.0305 ± 0.00625	0.0264 ± 0.00419	0.0333 ± 0.00186
Bacteroides thetaiotaomicron VPI-5482	3.7 ± 0.597	3.99 ± 0.872	3.41 ± 0.404	5.33 ± 1.09	3.59 ± 0.665	11.8 ± 1.88	7.91 ± 1.79	12 ± 2.54	4.56 ± 0.528	14.1 ± 2.42	9.93 ± 2.7	14.9 ± 1.31	4.43 ± 0.749	14.5 ± 2.01	11.5 ± 1.22	16.3 ± 1.92	1.23 ± 0.297	6.45 ± 1.99	3.05 ± 0.644	5.42 ± 1.71	5.42 ± 1.09	18.5 ± 3.37	10.3 ± 2.04	15.6 ± 0.752
Bacteroides vulgatus ATCC 8482	6.37 ± 1.18	6.46 ± 1.3	6.48 ± 0.307	6.48 ± 0.851	5.56 ± 1.48	9.46 ± 3.2	12.3 ± 2.36	16.7 ± 3.3	4.72 ± 0.628	8.79 ± 3.16	8.62 ± 1.23	14.8 ± 2.25	5.12 ± 1.52	8.86 ± 2.29	9.85 ± 1.54	21.3 ± 1.63	2.45 ± 0.455	3.92 ± 1.96	4.46 ± 1.07	8.84 ± 2.57	10.8 ± 1.42	11.2 ± 5.22	14.8 ± 2.6	25.6 ± 1.85
Bacteroides caccae TSDC17.2	3.14 ± 0.602	3.31 ± 0.756	2.97 ± 0.285	3.18 ± 0.492	7.87 ± 1.56	6.27 ± 1.48	6.33 ± 1.08	5.82 ± 1.48	9.59 ± 1.04	5.01 ± 0.599	6.54 ± 1.98	6.66 ± 1.42	9.45 ± 1.15	5.31 ± 1.09	7.1 ± 1.41	7.45 ± 0.857	4.96 ± 0.435	2.82 ± 0.666	3.72 ± 0.592	3.68 ± 0.947	22.1 ± 1.27	8.19 ± 1.3	12.5 ± 1.49	10.7 ± 0.989
Bacteroides finegoldii TSDC17.2	0.19 ± 0.0777	0.216 ± 0.0516	0.202 ± 0.102	0.239 ± 0.0925	0.0753 ± 0.0387	0.0686 ± 0.0249	0.244 ± 0.189	0.0584 ± 0.0306	0.077 ± 0.0446	0.0881 ± 0.0102	0.254 ± 0.192	0.117 ± 0.0419	0.0793 ± 0.025	0.0926 ± 0.00595	0.355 ± 0.167	0.253 ± 0.0914	0.0771 ± 0.0196	0.0324 ± 0.00607	0.271 ± 0.137	0.0854 ± 0.0216	0.341 ± 0.0751	0.094 ± 0.00859	0.873 ± 0.379	0.254 ± 0.0651
Bacteroides massiliensis TSDC17.2	0.0338 ± 0.00789	0.0356 ± 0.00923	0.0218 ± 0.00515	0.0533 ± 0.0259	0.0182 ± 0.00291	0.0209 ± 0.00343	0.0495 ± 0.0457	0.0194 ± 0.00159	0.0214 ± 0.00351	0.0178 ± 0.00221	0.0546 ± 0.0539	0.017 ± 0.00089	0.0188 ± 0.00226	0.0182 ± 0.00303	0.126 ± 0.145	0.0233 ± 0.00322	0.0153 ± 0.00201	0.0114 ± 0.0028	0.0891 ± 0.111	0.0134 ± 0.00348	0.0678 ± 0.00745	0.0328 ± 0.00397	0.286 ± 0.347	0.0391 ± 0.00363
Collinsella aerofaciens TSDC17.2	0.000612 ± 0.000902	0.00117 ± 0.00145	0.000356 ± 0.000286	0.000632 ± 0.000169	0.791 ± 0.368	0.495 ± 0.0716	1.03 ± 0.16	0.78 ± 0.141	1.22 ± 0.266	0.864 ± 0.118	1.43 ± 0.238	1.34 ± 0.359	1.47 ± 0.224	0.913 ± 0.163	1.52 ± 0.287	1.75 ± 0.438	0.789 ± 0.232	0.347 ± 0.117	0.635 ± 0.128	0.673 ± 0.109	3.47 ± 0.792	1.03 ± 0.341	2.16 ± 0.569	2.09 ± 0.68
Escherichia coli TSDC17.2	8.42 ± 1.62	7.52 ± 1.68	8.85 ± 0.803	8.78 ± 0.865	5.71 ± 1.23	6.91 ± 1.75	6.97 ± 1.49	8.01 ± 1.3	5.11 ± 0.613	6.63 ± 1.69	6.62 ± 1.44	7.37 ± 0.482	4.5 ± 1.08	6.29 ± 0.801	6.19 ± 1.23	7.43 ± 0.312	2.4 ± 0.246	3.19 ± 0.775	3.69 ± 0.748	3.99 ± 0.795	10.7 ± 1.35	9.25 ± 1.22	12.2 ± 1.05	11.7 ± 1.08
Odoribacter splanchnicus TSDC17.2	0.0995 ± 0.0514	0.0956 ± 0.0564	0.0688 ± 0.016	0.0904 ± 0.0204	0.995 ± 0.183	0.669 ± 0.104	0.882 ± 0.0674	0.839 ± 0.149	1.31 ± 0.248	0.63 ± 0.0455	0.858 ± 0.189	0.926 ± 0.0528	1.28 ± 0.0926	0.633 ± 0.141	0.945 ± 0.093	1.18 ± 0.104	0.669 ± 0.115	0.348 ± 0.0738	0.466 ± 0.0796	0.558 ± 0.138	2.96 ± 0.328	1.01 ± 0.0892	1.55 ± 0.133	1.64 ± 0.267
Parabacteroides distasonis TSDC17.2	2.79 ± 0.315	2.86 ± 0.486	2.76 ± 0.319	3.11 ± 0.333	2.08 ± 0.345	1.52 ± 0.29	1.9 ± 0.273	1.75 ± 0.404	2.03 ± 0.26	1.39 ± 0.273	1.6 ± 0.307	1.51 ± 0.213	2.3 ± 0.594	1.39 ± 0.14	2.09 ± 0.227	2.27 ± 0.112	1.41 ± 0.166	0.767 ± 0.0855	1.06 ± 0.126	1.02 ± 0.201	6.26 ± 0.328	2.26 ± 0.243	3.56 ± 0.469	3.01 ± 0.285
Ruminococcaceae sp. TSDC17.2	0.00268 ± 0.00361	0.00104 ± 0.000997	0.000366 ± 0.000257	0.00114 ± 0.000608	0.332 ± 0.0913	1.15 ± 0.362	0.264 ± 0.263	0.22 ± 0.14	0.404 ± 0.119	1.16 ± 0.174	0.325 ± 0.335	0.224 ± 0.128	0.349 ± 0.0884	1.37 ± 0.279	0.417 ± 0.175	0.169 ± 0.158	0.181 ± 0.0164	0.786 ± 0.185	0.273 ± 0.0874	0.143 ± 0.089	0.809 ± 0.0912	2.3 ± 0.471	0.906 ± 0.263	0.405 ± 0.226
Subdoligranulum variabile TSDC17.2	0.743 ± 0.165	0.699 ± 0.234	0.655 ± 0.0998	0.545 ± 0.315	1.18 ± 0.18	0.904 ± 0.118	1.07 ± 0.114	1.13 ± 0.242	1.22 ± 0.26	0.797 ± 0.128	1.04 ± 0.175	0.989 ± 0.0936	1.16 ± 0.127	0.807 ± 0.196	1.08 ± 0.0602	1.21 ± 0.139	0.713 ± 0.0832	0.478 ± 0.0564	0.612 ± 0.0696	0.657 ± 0.0539	3.18 ± 0.353	1.41 ± 0.21	2.05 ± 0.1	1.98 ± 0.368
Total bacterial load	50.7 ± 7.49	53 ± 8.46	51.9 ± 3.3	57.4 ± 3.02	42.5 ± 5.92	75.9 ± 12.8	62.4 ± 11.3	68.8 ± 13.2	44.8 ± 4.32	71.4 ± 10.7	57.4 ± 13.3	67.2 ± 5.02	45.3 ± 7.38	73.6 ± 8.24	64.9 ± 6.26	79.1 ± 5.57	22.5 ± 1.97	34.3 ± 5.51	30 ± 4.06	34.4 ± 9.05	100 ± 0	100 ± 0	100 ± 0	100 ± 0
(ii) Adjusted p values from comparison of linear fits
	Generalized linear mixed-effects model (Gaussian)
	Adjusted p value
Bacteria	HiSF-LoFV vs PF	HiSF-LoFV vs PFABN	HiSF-LoFV vs SBABN	PF vs PFABN	PF vs SBABN	PFABN vs SBABN
Bacteroides ovatus ATCC 8483	1.11e-07	1.61e-05	0.0329	0.0211	7.34e-07	0.00229
Bacteroides cellulosilyticus WH2	1.15e-05	0.524	0.344	0.000273	0.000112	1
Bacteroides thetaiotaomicron 7330	0.00906	0.524	0.749	0.141	0.0773	1
Bacteroides thetaiotaomicron VPI-5482	4.84e-07	0.000365	1.62e-07	0.00926	0.732	0.00229
Bacteroides vulgatus ATCC 8482	0.0147	0.00442	1.62e-07	0.724	3.62e-06	0.000372
Bacteroides caccae TSDC17.2	0.000231	0.0141	0.0147	0.286	0.256	1
Bacteroides finegoldii TSDC17.2	1	0.017	0.749	0.0211	0.701	0.312
Bacteroides massiliensis TSDC17.2	1	0.245	1	0.182	1	0.388
Collinsella aerofaciens TSDC17.2	0.0113	0.524	0.749	0.00192	0.000769	1
Escherichia coli TSDC17.2	0.132	0.227	0.0147	1	0.411	0.772
Odoribacter splanchnicus TSDC17.2	6.22e-07	0.00122	0.0147	0.00542	6.66e-05	0.772
Parabacteroides distasonis TSDC17.2	0.000293	0.245	0.215	0.0239	0.0193	1
Ruminococcaceae sp. TSDC17.2	3e-05	0.996	0.749	0.000103	1.16e-06	1
Subdoligranulum variabile TSDC17.2	0.00115	0.454	0.755	0.0393	0.00616	1
Total bacterial load	7.03e-05	0.0141	0.000309	0.0946	0.971	0.388
(iii) Estimated marginal means from linear fits
	EMM of mixed-effects linear model (Gaussian)
	EMM relative to mean day 2 abundance, relative to HiSF-LoFV
Bacteria	HiSF-LoFV	PF	PFABN	SBABN
Bacteroides ovatus ATCC 8483	1	2.85	2.29	1.52
Bacteroides cellulosilyticus WH2	1	2.13	1.2	1.29
Bacteroides thetaiotaomicron 7330	1	6.12	2.89	2.69
Bacteroides thetaiotaomicron VPI-5482	1	3.22	2.33	3.43
Bacteroides vulgatus ATCC 8482	1	1.76	2	3.43
Bacteroides caccae TSDC17.2	1	0.616	0.742	0.74
Bacteroides finegoldii TSDC17.2	1	1.08	3.69	1.85
Bacteroides massiliensis TSDC17.2	1	0.975	3.95	1.02
Collinsella aerofaciens TSDC17.2	1	0.652	1.14	1.11
Escherichia coli TSDC17.2	1	1.29	1.29	1.49
Odoribacter splanchnicus TSDC17.2	1	0.539	0.749	0.821
Parabacteroides distasonis TSDC17.2	1	0.67	0.874	0.862
Ruminococcaceae sp. TSDC17.2	1	3.39	0.928	0.565
Subdoligranulum variabile TSDC17.2	1	0.706	0.897	0.936
Total bacterial load	1	1.67	1.39	1.62

## Sheet: Table 2b
Supplementary File 2: Effects of pea fiber, PFABN and SBABN supplementation of the HiSF-LoFV diet on the absolute abundances of members of the defined community in gnotobiotic mice (related to Figs. 2 and 5).
(b) COPRO-Seq results obtained from treatment groups described in Figure 2 (Experiment 2)
(i) Community configuration (mean ± SD)
	Absolute Abundance (10^9 genome equivalents per gram feces)																Absolute Abundance (10^9 genome equivalents per gram cecal material)				Percent Abundance
Experimental day	2	Day 2	Day 2	Day 2	6	Day 6	Day 6	Day 6	8	Day 8	Day 8	Day 8	11	Day 11	Day 11	Day 11	12				12	Day 12	Day 12	Day 12
Bacteria	HiSF-LoFV	PF	PFABN	SBABN	HiSF-LoFV	PF	PFABN	SBABN	HiSF-LoFV	PF	PFABN	SBABN	HiSF-LoFV	PF	PFABN	SBABN	HiSF-LoFV	PF	PFABN	SBABN	HiSF-LoFV	PF	PFABN	SBABN
Bacteroides ovatus ATCC 8483	6.49 ± 2.01	8.26 ± 2.62	6.09 ± 1.35	5.22 ± 1.95	6.59 ± 0.885	18.5 ± 1.37	13.6 ± 2.84	10.7 ± 2.12	6.13 ± 1.65	18.1 ± 2.93	14.4 ± 3.48	7.56 ± 0.832	5.83 ± 1.18	18.6 ± 2.52	16.3 ± 2.64	7.63 ± 1.46	2.86 ± 0.76	9.04 ± 1.93	6.03 ± 1.52	3 ± 0.528	9.9 ± 0.884	16.7 ± 1.53	15.9 ± 1.96	7.98 ± 0.852
Bacteroides cellulosilyticus WH2	18.7 ± 5.78	20.1 ± 4.36	16.6 ± 4	13.7 ± 3.18	13.1 ± 1.8	31.2 ± 5.15	16.6 ± 5.71	18.5 ± 1.69	11.8 ± 1.73	28.6 ± 4.17	15.7 ± 4.11	14.3 ± 1.15	13.2 ± 0.904	25.3 ± 5.73	19.5 ± 1.89	17.3 ± 4.31	5.56 ± 1.21	14 ± 3.86	7.33 ± 1.18	6.88 ± 1.66	19.4 ± 1.75	26.2 ± 5.17	19.6 ± 1.11	18.2 ± 3.02
Bacteroides thetaiotaomicron 7330	9.97 ± 6.16	11.6 ± 2.95	8.68 ± 2.57	7.08 ± 2.6	0.0446 ± 0.0111	0.92 ± 0.456	0.181 ± 0.0658	0.185 ± 0.09	0.0168 ± 0.00395	0.0579 ± 0.0151	0.0351 ± 0.00619	0.0334 ± 0.00645	0.0174 ± 0.00148	0.0417 ± 0.00819	0.0356 ± 0.00698	0.0353 ± 0.00863	0.00805 ± 0.00273	0.0208 ± 0.00589	0.0112 ± 0.00336	0.0123 ± 0.00245	0.0278 ± 0.00515	0.0382 ± 0.0048	0.0294 ± 0.00385	0.0323 ± 0.00329
Bacteroides thetaiotaomicron VPI-5482	4.52 ± 2.12	5.35 ± 1.65	3.9 ± 1	2.96 ± 0.856	5.39 ± 0.522	18.4 ± 4.83	10.1 ± 3.53	16.7 ± 1.63	4.95 ± 2.09	24.1 ± 4.33	13.2 ± 3.76	16.6 ± 1.64	5.08 ± 0.561	26.1 ± 7.46	18 ± 3.58	20.2 ± 5.37	2.05 ± 0.622	12.3 ± 3.63	5.03 ± 1.66	5.7 ± 1.2	7.07 ± 1.02	22.5 ± 2.94	13.1 ± 2.06	15.1 ± 1.61
Bacteroides vulgatus ATCC 8482	9.3 ± 4.32	10 ± 2.78	7.8 ± 1.68	7.66 ± 0.828	8.44 ± 0.62	14.3 ± 5.2	15.3 ± 3	22.5 ± 3.67	6.06 ± 0.69	12.5 ± 4.37	12.6 ± 3.71	17.5 ± 4.64	6.28 ± 0.816	11.5 ± 4.33	14.8 ± 3.89	20.7 ± 5.75	3.12 ± 0.793	5.33 ± 2.16	5.56 ± 1.69	8.99 ± 3.82	10.8 ± 1.26	9.77 ± 3.02	14.6 ± 2.36	22.9 ± 5.21
Bacteroides caccae TSDC17.2	3.89 ± 1.23	4.25 ± 1.06	3.47 ± 0.634	3.39 ± 0.59	10.5 ± 0.954	8.69 ± 0.817	7.74 ± 1.46	8.55 ± 1.29	9.74 ± 3.19	7.96 ± 1.3	9.07 ± 1.83	7.71 ± 0.958	12.1 ± 2.29	6.56 ± 1.19	11.3 ± 1.6	9.43 ± 3.16	6.04 ± 1.53	3.81 ± 0.492	4.65 ± 0.698	4.26 ± 0.78	21 ± 2.06	7.23 ± 1.38	12.5 ± 1.79	11.4 ± 1.82
Bacteroides finegoldii TSDC17.2	0.354 ± 0.273	0.298 ± 0.0704	0.153 ± 0.0647	0.163 ± 0.102	0.108 ± 0.0399	0.126 ± 0.0247	0.152 ± 0.0585	0.119 ± 0.0206	0.0959 ± 0.0453	0.13 ± 0.041	0.3 ± 0.148	0.202 ± 0.0833	0.127 ± 0.0206	0.148 ± 0.0304	0.895 ± 0.436	0.383 ± 0.154	0.114 ± 0.0212	0.0674 ± 0.0144	0.323 ± 0.11	0.158 ± 0.0613	0.403 ± 0.0545	0.125 ± 0.0169	0.837 ± 0.168	0.408 ± 0.0936
Bacteroides massiliensis TSDC17.2	0.0287 ± 0.0112	0.034 ± 0.0134	0.0301 ± 0.00867	0.0239 ± 0.00595	0.027 ± 0.00238	0.0283 ± 0.00919	0.0259 ± 0.00632	0.0713 ± 0.11	0.0245 ± 0.00394	0.0369 ± 0.013	0.026 ± 0.00591	0.0719 ± 0.116	0.0366 ± 0.00372	0.0852 ± 0.135	0.0391 ± 0.00384	0.169 ± 0.311	0.0162 ± 0.00137	0.0619 ± 0.118	0.0152 ± 0.00363	0.0653 ± 0.127	0.0581 ± 0.00914	0.107 ± 0.197	0.0402 ± 0.00505	0.175 ± 0.342
Collinsella aerofaciens TSDC17.2	0.00037 ± 0.000463	0.0202 ± 0.0492	0.000908 ± 0.0018	0.00446 ± 0.00837	2.07 ± 0.328	0.885 ± 0.465	1.71 ± 0.311	1.71 ± 0.186	1.83 ± 0.584	1.01 ± 0.698	1.61 ± 0.407	1.63 ± 0.588	1.44 ± 0.375	1.52 ± 0.298	1.15 ± 0.135	1.63 ± 0.659	1.25 ± 0.108	0.63 ± 0.11	1.08 ± 0.0817	1.08 ± 0.325	4.46 ± 0.767	1.2 ± 0.291	2.93 ± 0.432	2.92 ± 0.863
Escherichia coli TSDC17.2	10.6 ± 1.25	13.1 ± 2.5	11.7 ± 2.12	9.11 ± 2.46	6.24 ± 0.553	9.04 ± 1.72	8.16 ± 2.01	8.69 ± 1.89	5.12 ± 0.826	9.71 ± 2.45	8.06 ± 2.12	7.43 ± 1.6	5.44 ± 0.54	8.2 ± 2.52	9.07 ± 1.67	8.46 ± 1.62	3.06 ± 0.552	4.55 ± 1.25	3.9 ± 0.582	4.12 ± 0.784	10.7 ± 0.85	8.47 ± 1.89	10.5 ± 1.64	11 ± 1.35
Odoribacter splanchnicus TSDC17.2	0.202 ± 0.288	0.129 ± 0.0722	0.0921 ± 0.0509	0.171 ± 0.104	1.76 ± 0.189	1.12 ± 0.308	1.21 ± 0.242	1.46 ± 0.313	1.65 ± 0.459	1.1 ± 0.427	1.29 ± 0.219	1.31 ± 0.264	1.98 ± 0.312	1.02 ± 0.416	1.59 ± 0.251	1.58 ± 0.382	0.942 ± 0.172	0.582 ± 0.144	0.643 ± 0.1	0.666 ± 0.263	3.32 ± 0.339	1.09 ± 0.266	1.73 ± 0.262	1.72 ± 0.385
Parabacteroides distasonis TSDC17.2	3.28 ± 0.956	3.61 ± 0.724	3.17 ± 0.497	2.84 ± 0.759	2.81 ± 0.372	2.33 ± 0.214	2.35 ± 0.611	2.49 ± 0.276	2.28 ± 0.454	2.05 ± 0.304	2.18 ± 0.503	2.04 ± 0.354	3.47 ± 0.19	2.37 ± 0.646	3.37 ± 0.444	3.06 ± 0.618	1.87 ± 0.161	1.27 ± 0.213	1.48 ± 0.286	1.41 ± 0.245	6.67 ± 0.877	2.37 ± 0.116	3.93 ± 0.183	3.76 ± 0.348
Ruminococcaceae sp. TSDC17.2	0.231 ± 0.176	0.238 ± 0.191	0.138 ± 0.11	0.192 ± 0.0947	0.54 ± 0.0985	1.91 ± 0.366	0.572 ± 0.0923	0.45 ± 0.133	0.703 ± 0.477	2.63 ± 1.72	0.587 ± 0.256	0.381 ± 0.0694	0.548 ± 0.0805	2.35 ± 0.706	0.772 ± 0.199	0.468 ± 0.12	0.242 ± 0.0495	1.11 ± 0.26	0.29 ± 0.0647	0.217 ± 0.0376	0.847 ± 0.0657	2.05 ± 0.153	0.772 ± 0.131	0.595 ± 0.162
Subdoligranulum variabile TSDC17.2	0.69 ± 0.292	0.776 ± 0.29	0.904 ± 0.182	0.975 ± 0.151	1.54 ± 0.201	1.09 ± 0.134	1.23 ± 0.308	1.39 ± 0.171	1.45 ± 0.258	1.1 ± 0.105	1.36 ± 0.271	1.3 ± 0.174	1.85 ± 0.214	1.18 ± 0.221	1.75 ± 0.171	1.72 ± 0.391	1 ± 0.179	0.598 ± 0.083	0.77 ± 0.0701	0.836 ± 0.0579	3.52 ± 0.179	1.14 ± 0.244	2.1 ± 0.372	2.3 ± 0.542
Total bacterial load	68.9 ± 23	78.4 ± 12.6	63.4 ± 12.9	54.3 ± 11.2	59.8 ± 4.75	109 ± 15.7	79.7 ± 19	94.1 ± 7.66	52.4 ± 8.74	110 ± 11.8	81.1 ± 18.1	78.8 ± 6.02	58 ± 5.51	106 ± 16.3	99.3 ± 13.4	93.3 ± 17.6	28.6 ± 5.6	53.9 ± 10.4	37.7 ± 7.15	38 ± 7.95	100 ± 0	100 ± 0	100 ± 0	100 ± 0
(ii) Adjusted p values from comparison of linear fits
	Generalized linear mixed-effects model (Gaussian)
	Adjusted p value
Bacteria	HiSF-LoFV vs PF	HiSF-LoFV vs PFABN	HiSF-LoFV vs SBABN	PF vs PFABN	PF vs SBABN	PFABN vs SBABN
Bacteroides ovatus ATCC 8483	2.71e-09	8.83e-07	0.145	0.00597	2.43e-09	5.16e-05
Bacteroides cellulosilyticus WH2	1.63e-08	0.0335	0.124	3.33e-06	9.28e-08	1
Bacteroides thetaiotaomicron 7330	0.00161	0.945	0.899	0.0073	0.00354	1
Bacteroides thetaiotaomicron VPI-5482	2.21e-07	0.00261	9.7e-05	0.00116	0.0383	0.481
Bacteroides vulgatus ATCC 8482	0.0422	0.023	0.000106	0.957	0.00586	0.153
Bacteroides caccae TSDC17.2	0.00875	0.448	0.124	0.272	0.757	1
Bacteroides finegoldii TSDC17.2	0.983	0.00261	0.471	0.00272	0.452	0.153
Bacteroides massiliensis TSDC17.2	0.983	1	0.727	0.982	0.772	1
Collinsella aerofaciens TSDC17.2	0.00399	0.438	0.899	0.167	0.0114	1
Escherichia coli TSDC17.2	0.00641	0.0395	0.124	0.957	0.693	1
Odoribacter splanchnicus TSDC17.2	0.00246	0.108	0.244	0.355	0.14	1
Parabacteroides distasonis TSDC17.2	0.0251	0.785	0.471	0.261	0.454	1
Ruminococcaceae sp. TSDC17.2	2.13e-05	1	0.9	3.99e-05	8.88e-07	1
Subdoligranulum variabile TSDC17.2	0.000939	0.449	0.611	0.0225	0.00773	1
Total bacterial load	4.91e-07	0.00167	0.00059	0.0073	0.00721	1
(iii) Estimated marginal means from linear fits
	EMM of mixed-effects linear model (Gaussian)
	EMM relative to mean day 2 abundance, relative to HiSF-LoFV
Bacteria	HiSF-LoFV	PF	PFABN	SBABN
Bacteroides ovatus ATCC 8483	1	2.98	2.39	1.38
Bacteroides cellulosilyticus WH2	1	2.24	1.36	1.31
Bacteroides thetaiotaomicron 7330	1	13.1	3.21	3.19
Bacteroides thetaiotaomicron VPI-5482	1	4.44	2.67	3.45
Bacteroides vulgatus ATCC 8482	1	1.85	2.06	2.89
Bacteroides caccae TSDC17.2	1	0.719	0.866	0.79
Bacteroides finegoldii TSDC17.2	1	1.22	4.02	2.11
Bacteroides massiliensis TSDC17.2	1	1.69	1.03	3.41
Collinsella aerofaciens TSDC17.2	1	0.636	0.837	0.928
Escherichia coli TSDC17.2	1	1.6	1.5	1.44
Odoribacter splanchnicus TSDC17.2	1	0.603	0.758	0.795
Parabacteroides distasonis TSDC17.2	1	0.79	0.922	0.884
Ruminococcaceae sp. TSDC17.2	1	3.84	1.07	0.717
Subdoligranulum variabile TSDC17.2	1	0.698	0.896	0.909
Total bacterial load	1	1.91	1.53	1.56

## Sheet: Table 2c
Supplementary File 2: Effects of pea fiber, PFABN and SBABN supplementation of the HiSF-LoFV diet on the absolute abundances of members of the defined community in gnotobiotic mice (related to Figs. 2 and 5).
(c) COPRO-Seq results obtained from treatment groups described in Figure 5 (Experiment 3)
Community configuration (mean ± sd)
	Absolute Abundance (10^9 genome equivalents per gram feces)						Absolute Abundance (10^9 genome equivalents per gram cecal material)		Percent Abundance
Experimental day	2	Day 2	6	Day 6	8	Day 8	9	Day 9	9	Day 9
Bacteria	HiSF-LoFV	PF	HiSF-LoFV	PF	HiSF-LoFV	PF	HiSF-LoFV	PF	HiSF-LoFV	PF
Bacteroides ovatus ATCC 8483	8.46 ± 2.5	8.99 ± 1.24	6.45 ± 1.58	18.9 ± 2.43	6.4 ± 1.69	20.2 ± 2.45	3.1 ± 0.569	9.11 ± 1.63	8.03 ± 0.897	17.1 ± 0.708
Bacteroides cellulosilyticus WH2	17.5 ± 5.27	19.4 ± 3.52	21.5 ± 5.22	44.1 ± 7.57	22.2 ± 5.47	43.7 ± 8.18	9.97 ± 0.83	19.7 ± 3.16	26 ± 1.24	37.2 ± 1.58
Bacteroides thetaiotaomicron 7330	3.75 ± 2.47	3.4 ± 1.45	0.0325 ± 0.00905	0.0467 ± 0.0115	0.0324 ± 0.00868	0.0412 ± 0.00968	0.0123 ± 0.00175	0.016 ± 0.00277	0.0321 ± 0.00256	0.0303 ± 0.00272
Bacteroides thetaiotaomicron VPI-5482	3.04 ± 1.27	3.61 ± 0.94	8.7 ± 2.17	18 ± 3.36	11 ± 3.08	22.3 ± 3.86	2.98 ± 0.642	8.5 ± 1.58	7.76 ± 1.4	16 ± 1.17
Bacteroides vulgatus ATCC 8482	1.52 ± 0.721	1.4 ± 0.837	8.82 ± 2.7	6.52 ± 1.87	8.39 ± 3.01	6.56 ± 2.48	3.57 ± 0.766	2.95 ± 1.64	9.31 ± 1.91	5.44 ± 2.4
Bacteroides caccae TSDC17.2	13.2 ± 4.07	13.1 ± 1.98	16.2 ± 3.54	12.4 ± 2.4	19 ± 4.47	11.6 ± 3.27	9.56 ± 0.801	4.79 ± 1.26	25 ± 0.457	9.14 ± 2.16
Bacteroides finegoldii TSDC17.2	0.95 ± 0.461	0.874 ± 0.308	0.334 ± 0.17	0.34 ± 0.0952	0.38 ± 0.126	0.205 ± 0.0258	0.118 ± 0.0328	0.056 ± 0.00937	0.307 ± 0.0728	0.106 ± 0.01
Bacteroides massiliensis TSDC17.2	1.97 ± 0.925	1.98 ± 0.509	0.0486 ± 0.0181	0.0304 ± 0.00882	0.0966 ± 0.122	0.023 ± 0.00486	0.0674 ± 0.0755	0.0107 ± 0.00249	0.176 ± 0.195	0.0204 ± 0.00442
Collinsella aerofaciens TSDC17.2	0.991 ± 0.352	1.16 ± 0.295	1.81 ± 0.574	0.936 ± 0.23	1.94 ± 0.583	0.903 ± 0.159	1.02 ± 0.282	0.436 ± 0.14	2.7 ± 0.798	0.842 ± 0.305
Escherichia coli TSDC17.2	11.2 ± 3.1	12.1 ± 1.6	5.72 ± 0.934	6.8 ± 1.28	5.76 ± 1.28	7.18 ± 1.48	2.91 ± 0.296	3.59 ± 0.547	7.6 ± 0.651	6.79 ± 0.541
Odoribacter splanchnicus TSDC17.2	0.451 ± 0.204	0.488 ± 0.178	1.85 ± 0.419	1.02 ± 0.21	2.09 ± 0.419	1.07 ± 0.283	1.05 ± 0.204	0.485 ± 0.0635	2.75 ± 0.489	0.92 ± 0.0698
Parabacteroides distasonis TSDC17.2	8.81 ± 2.63	9.49 ± 1.9	5.53 ± 1.26	3.25 ± 0.532	5.67 ± 1.36	3.29 ± 0.589	2.42 ± 0.219	1.37 ± 0.175	6.33 ± 0.521	2.59 ± 0.12
Ruminococcaceae sp. TSDC17.2	0.0204 ± 0.0399	0.0339 ± 0.0468	0.36 ± 0.12	1.46 ± 0.533	0.362 ± 0.139	1.67 ± 0.559	0.202 ± 0.0459	0.767 ± 0.244	0.524 ± 0.0922	1.44 ± 0.344
Subdoligranulum variabile TSDC17.2	1.11 ± 0.207	1.37 ± 0.336	1.65 ± 0.271	1.38 ± 0.12	1.69 ± 0.287	1.57 ± 0.173	0.89 ± 0.144	0.696 ± 0.111	2.33 ± 0.344	1.32 ± 0.0755
Total bacterial load	73.5 ± 21.6	77.8 ± 10.8	79.4 ± 17.1	116 ± 18.5	85.4 ± 19.5	121 ± 19	38.3 ± 3.13	53 ± 8.4	100 ± 0	100 ± 0
