# Supplementary material for: Microbiota functional activity biosensors for characterizing nutrient metabolism in vivo
Source: eLife. 2021 Mar 8;10:e64478. doi: 10.7554/eLife.64478 (PMC7939548; doi:10.7554/eLife.64478)
Supplement: Supplementary file 3. — Cyclic loess normalized protein abundance Z-scores of (A) Bacteroides caccae TSDC17.2–1.2, (B) Bacteroides cellulosilyticus WH2, (C) Bacteroides finegoldii TSDC17.2–1.1, (D) Bacteroides massiliensis TSDC17.2–1.1, (E) Bacteroides ovatus ATCC8483, (F) Bacteroides thetaiotaomicron VPI-5482, (G) Bacteroides vulgatus ATCC8482, (H) Collinsella aerofaciens TSDC17.2–1.1, (I) Escherichia coli TSDC17.2–1.2, (J) Odoribacter splanchnicus TSDC17.2–1.2, (K) Parabacteroides distasonis TSDC17.2–1.1, (L) Ruminococcaceae sp TSDC17.2–1.2, (M) Subdoligranulum variabile TSDC17.2–1.1. [file elife-64478-supp3.xlsx]

## Sheet: Table 3a
Supplementary File 3: Meta-proteomic analysis of the effects of pea fiber, PFABN and SBABN supplementation of the HiSF-LoFV diet on gene expression in members of the defined community (related to Fig. 2).
(a) Bacteroides caccae TSDC17.2 (cyclic loess normalized protein abundance Z-scores)
	Experiment 1																								Experiment 2
	HiSF-LoFV						HiSF-LoFV + pea fiber						HiSF-LoFV + PFABN						HiSF-LoFV + SBABN						HiSF-LoFV						HiSF-LoFV + pea fiber							HiSF-LoFV + PFABN							HiSF-LoFV + SBABN
locus_tag	2.0	3.2	10.0	17.0	18.0	mean ± SD	1.2	4.0	6.2	12.0	15.0	mean ± SD	1.0	4.2	6.0	7.2	9.2	mean ± SD	2.2	3.0	5.0	8.0	13.0	mean ± SD	1.1	3.1	4.1	5.1	11.0	mean ± SD	2.1	6.0	8.0	11.12	15.0	17.0	mean ± SD	2.5	7.0	9.0	10.0	13.0	13.5	mean ± SD	1.5	3.5	5.5	14.0	16.0
BcaccTSDC17_00035	0.5	-1.39	-0.67	-1.03	-0.67	-0.65 ± 0.71	-0.86	-1.28	-0.39	-0.96	-0.76	-0.85 ± 0.32	-0.64	-0.46	-0.26	0.22	-0.8	-0.39 ± 0.4	-0.99	-0.52	-0.53	-1.06	1.48	-0.32 ± 1.04	-	-	-	-	-	-	-	-	-	-	-	-	-	-	-	-	-	-	-	-	-	-	-	-	-
BcaccTSDC17_00071	0.92	0.71	1.02	1.25	1.02	0.98 ± 0.19	1.16	1.27	1.23	1.3	1.14	1.22 ± 0.07	1.31	0.67	1.34	0.84	1.02	1.04 ± 0.29	1.21	1.13	1.65	1.48	1.12	1.32 ± 0.23	0.97	1.29	1.15	0.94	1.33	1.14 ± 0.18	1.72	0.66	1.65	1.57	1.3	1.15	1.42 ± 0.23	0.49	1.73	1.45	1.62	1.75	1.58	1.6 ± 0.13	1.34	1.37	1.18	1.4	1.94
BcaccTSDC17_00074	-0.59	-1	0.52	0.41	-0.74	-0.28 ± 0.7	-0.8	-0.93	-0.37	-0.66	-0.95	-0.74 ± 0.24	-0.82	-0.63	-0.88	-0.32	-0.48	-0.63 ± 0.23	-1.23	-0.72	-0.98	-1.02	-0.88	-0.97 ± 0.18	-0.67	-0.74	-0.82	-0.87	0.76	-0.47 ± 0.69	-0.41	-0.81	0.75	-1.44	-0.07	-0.33	-0.27 ± 0.91	-0.51	-1.28	0.01	0.47	-0.33	-0.96	-0.2 ± 0.6	0.9	0.8	-0.56	-0.84	-0.61
BcaccTSDC17_00079	-	-	-	-	-	-	-	-	-	-	-	-	-	-	-	-	-	-	-	-	-	-	-	-	-0.96	-0.67	-0.7	-0.5	0	-0.56 ± 0.36	-0.99	-0.97	-0.86	-0.37	-1.03	-0.98	-0.81 ± 0.3	-0.49	-0.67	-0.95	-0.7	-0.81	-0.26	-0.68 ± 0.3	-1	-0.59	-0.96	-0.93	-0.81
BcaccTSDC17_00106	-1.08	-1.21	-1.35	-1.09	-0.73	-1.09 ± 0.23	-0.83	0.89	-1.12	-0.41	-0.43	-0.38 ± 0.77	-0.6	-0.99	-0.65	-1.47	-0.93	-0.93 ± 0.35	-0.31	-0.69	-0.61	-0.94	-1.07	-0.72 ± 0.3	-	-	-	-	-	-	-	-	-	-	-	-	-	-	-	-	-	-	-	-	-	-	-	-	-
BcaccTSDC17_00140	-0.8	0.26	0.55	0.65	-0.53	0.03 ± 0.65	-0.61	0.55	0.13	0.1	0.31	0.1 ± 0.44	-0.36	1.12	-0.84	0.35	-1.1	-0.16 ± 0.91	1.05	0.64	-0.45	-0.33	-0.51	0.08 ± 0.72	0.37	-0.21	0.17	1.81	0.78	0.58 ± 0.78	0.22	-0.55	-1.41	-1.98	-0.57	1.18	-0.69 ± 1.38	-0.48	0.93	0.54	-1.33	0.75	0.42	0.09 ± 0.96	-0.12	0.42	-1.44	1.02	0.24
BcaccTSDC17_00168	1.29	0.29	-1.5	0.24	0.13	0.09 ± 1	0.62	-0.73	0.68	0.57	0.36	0.3 ± 0.59	-0.65	-0.56	0.69	0.26	0.71	0.09 ± 0.66	-0.2	-0.13	-0.92	1.09	-0.95	-0.22 ± 0.83	0.3	0.39	0.27	-0.45	0.57	0.22 ± 0.39	0.51	0.2	0.55	0.44	0.39	0.32	0.42 ± 0.1	-0.39	-1.46	-0.06	-1.04	0.33	0.39	-0.1 ± 0.66	0.53	0.4	0.54	-0.1	0.15
BcaccTSDC17_00240	-	-	-	-	-	-	-	-	-	-	-	-	-	-	-	-	-	-	-	-	-	-	-	-	-0.66	-0.82	-0.64	-1.11	0.03	-0.64 ± 0.42	-0.53	-0.84	0.84	-0.83	-1.1	-0.92	-0.5 ± 0.9	-0.77	-0.99	-0.51	-1.05	-0.63	0.01	-0.54 ± 0.43	-0.5	-1.09	-1.03	-0.83	0.13
BcaccTSDC17_00243	0.17	0.97	0.93	0.85	0.66	0.71 ± 0.33	1.01	0.9	1.26	1.05	0.83	1.01 ± 0.16	0.78	0.57	0.76	0.65	0.18	0.59 ± 0.24	0.73	0.07	-0.01	0.31	0.12	0.25 ± 0.3	1.03	1.32	1.08	1.58	0.89	1.18 ± 0.27	1.34	-0.26	0.5	0.98	1.12	-0.51	0.52 ± 0.73	1.41	0.93	1.11	1.03	0.83	1.07	1.01 ± 0.13	0.73	0.82	0.72	0.8	-0.01
BcaccTSDC17_00244	1.59	1.91	1.73	2.06	1.94	1.84 ± 0.18	2.02	2.13	2.18	2.04	2.21	2.12 ± 0.08	1.63	2.08	2.08	2.09	2.06	1.99 ± 0.2	2.19	1.63	1.44	1.54	1.67	1.69 ± 0.29	1.98	2.17	2.16	1.84	1.97	2.02 ± 0.14	2.53	2.08	2	2.39	2.21	2.09	2.17 ± 0.17	2.07	2.08	2.17	2.2	2.27	2.33	2.24 ± 0.07	2.06	2.25	1.82	2.2	2.05
BcaccTSDC17_00245	2.42	2.23	2.31	2.36	2.29	2.32 ± 0.07	2.54	2.45	2.71	2.87	2.6	2.63 ± 0.16	2.4	2.41	2.64	2.37	2.32	2.43 ± 0.12	2.3	2.5	2.58	2.83	2.77	2.59 ± 0.21	2.29	2.45	2.32	2.04	2.1	2.24 ± 0.17	2.61	2.44	2.33	2.58	2.43	2.33	2.42 ± 0.12	2.41	2.17	2.57	2.37	2.15	2.2	2.32 ± 0.19	2.03	2.34	2.28	2.25	2.14
BcaccTSDC17_00247	0.07	1.03	1.09	0.7	0.82	0.74 ± 0.41	1.37	0.83	0.83	1.31	1.06	1.08 ± 0.26	1.31	0.39	0.81	1.13	0.62	0.85 ± 0.37	-0.4	0.28	0.95	0.78	1.28	0.58 ± 0.66	1.65	1.29	1.4	0.71	1.23	1.25 ± 0.34	1.27	1.54	1.58	1.51	1.47	1.46	1.51 ± 0.05	1.47	1.27	0.36	1.31	1.2	1.26	1.03 ± 0.45	1.43	1.5	1.22	1.51	1.43
BcaccTSDC17_00248	0.76	0.6	-0.51	0.26	0.19	0.26 ± 0.49	0.64	0.84	-0.02	0.46	0.69	0.52 ± 0.33	0.59	0.42	0.75	0.27	0.57	0.52 ± 0.18	-0.46	0.56	1.02	0.61	0.82	0.51 ± 0.57	1.02	0.41	0.89	0.07	1.19	0.72 ± 0.46	0.43	1.31	0.89	1.14	1.44	0.49	0.99 ± 0.4	-0.46	0.96	0.16	0.99	0.89	1.05	0.77 ± 0.41	0.81	0.8	0.86	0.7	1.13
BcaccTSDC17_00253	-1.24	0.16	-0.46	0.12	-1.02	-0.49 ± 0.64	-0.95	-1.07	-0.92	-0.73	-1.08	-0.95 ± 0.14	-1.48	-0.55	-1.03	-0.25	-0.72	-0.81 ± 0.47	-0.84	-0.83	-1.31	-1.05	-1.12	-1.03 ± 0.2	-	-	-	-	-	-	-	-	-	-	-	-	-	-	-	-	-	-	-	-	-	-	-	-	-
BcaccTSDC17_00294	-	-	-	-	-	-	-	-	-	-	-	-	-	-	-	-	-	-	-	-	-	-	-	-	-0.86	-0.71	-0.58	0	-0.52	-0.53 ± 0.33	-0.52	-0.62	0.02	-0.57	-0.5	-0.84	-0.47 ± 0.36	-0.38	0	-0.55	-0.61	-0.69	0.07	-0.45 ± 0.35	-1.21	-0.71	-0.39	-0.79	-0.97
BcaccTSDC17_00321	-	-	-	-	-	-	-	-	-	-	-	-	-	-	-	-	-	-	-	-	-	-	-	-	-1.09	0.53	1.21	0.7	0.72	0.41 ± 0.88	0.07	-0.76	-1.22	0.85	-0.55	1.02	0.02 ± 1.09	0.02	-0.5	-0.8	0.98	-0.82	1.17	0.13 ± 1.09	-1.32	-0.26	-0.81	-0.96	-0.64
BcaccTSDC17_00329	-0.62	0.17	-0.67	-1.05	0.06	-0.42 ± 0.52	-1.17	-0.73	-1.18	-0.55	-0.47	-0.82 ± 0.34	-0.42	-0.72	-0.67	-0.58	-0.75	-0.63 ± 0.13	-1.29	-0.7	-1.17	-0.55	-0.72	-0.89 ± 0.32	-1.06	-1.14	-0.81	-0.97	-1.15	-1.03 ± 0.14	-0.9	-0.81	-1.02	-0.76	-1.31	-1.28	-1.09 ± 0.26	-1.54	-0.93	-1	-1.14	-0.77	-1.11	-1 ± 0.17	-0.63	-1.41	-0.81	-1.15	-1.11
BcaccTSDC17_00330	0.73	-0.2	-1.21	-0.05	0.15	-0.12 ± 0.71	0.01	-0.39	-1.21	0.35	0.34	-0.18 ± 0.65	0.52	-0.87	-1	0.31	-0.77	-0.36 ± 0.72	-0.76	0.17	0.03	0.63	-0.03	0.01 ± 0.5	-	-	-	-	-	-	-	-	-	-	-	-	-	-	-	-	-	-	-	-	-	-	-	-	-
BcaccTSDC17_00338	0.59	-0.03	-0.32	0.32	0.16	0.14 ± 0.34	-0.7	-0.57	-0.39	-0.85	-0.44	-0.59 ± 0.19	-0.52	0.94	-0.31	0.61	-0.51	0.04 ± 0.68	-0.16	-0.44	-0.34	-1	-0.33	-0.45 ± 0.32	-0.42	0.12	-0.23	0.56	-0.3	-0.06 ± 0.4	-0.67	-0.06	0.17	-0.28	-0.01	0.19	0.02 ± 0.22	-0.23	-0.63	0.59	0.2	0.35	0.09	0.31 ± 0.22	-0.01	0.29	0.08	-0.46	0.46
BcaccTSDC17_00346	-	-	-	-	-	-	-	-	-	-	-	-	-	-	-	-	-	-	-	-	-	-	-	-	-1.04	-0.65	-0.46	-1.04	-0.89	-0.82 ± 0.25	-0.86	-0.43	-0.78	-1.01	-1.24	-0.46	-0.87 ± 0.33	-1.04	-0.57	-0.87	0.77	-1.04	-0.33	-0.37 ± 0.82	-0.68	-0.74	-0.87	-0.49	-0.96
BcaccTSDC17_00349	-	-	-	-	-	-	-	-	-	-	-	-	-	-	-	-	-	-	-	-	-	-	-	-	-1.08	-0.66	-1.1	-0.22	-1.64	-0.94 ± 0.53	-0.7	-0.99	0.03	-0.09	-0.45	-0.88	-0.35 ± 0.41	-1.13	0.29	0.25	0.5	0.44	-0.2	0.25 ± 0.31	0.11	-0.65	0.4	-0.78	0.04
BcaccTSDC17_00454	-	-	-	-	-	-	-	-	-	-	-	-	-	-	-	-	-	-	-	-	-	-	-	-	0.69	-0.74	-0.71	-0.67	-1.44	-0.57 ± 0.77	-0.69	-0.69	-0.82	-0.93	-0.87	-0.28	-0.72 ± 0.3	-0.39	-0.44	-0.67	-0.67	0.53	-0.89	-0.43 ± 0.65	-0.68	-1.11	-1.14	-0.89	-0.74
BcaccTSDC17_00456	-	-	-	-	-	-	-	-	-	-	-	-	-	-	-	-	-	-	-	-	-	-	-	-	-0.64	-1.08	0.72	-0.79	-0.99	-0.56 ± 0.73	-0.42	-0.42	0.52	-0.41	-0.71	-0.86	-0.36 ± 0.62	-0.37	-0.91	-0.42	-0.99	-0.85	-0.69	-0.74 ± 0.24	-0.68	-0.84	-0.33	-0.87	-0.73
BcaccTSDC17_00464	1	0.64	0.61	0.64	0.4	0.66 ± 0.22	0.68	0.73	0.4	0.45	0.66	0.58 ± 0.15	0.6	0.79	0.59	0.9	1.04	0.78 ± 0.19	1.28	0.96	0.85	0.69	1.09	0.98 ± 0.23	-	-	-	-	-	-	-	-	-	-	-	-	-	-	-	-	-	-	-	-	-	-	-	-	-
BcaccTSDC17_00465	-	-	-	-	-	-	-	-	-	-	-	-	-	-	-	-	-	-	-	-	-	-	-	-	-0.38	-0.38	-0.74	-0.44	-0.13	-0.41 ± 0.22	-0.68	-0.23	0.51	-0.96	-0.45	-0.72	-0.41 ± 0.65	-0.66	-0.9	0.08	-0.4	-0.59	-0.61	-0.38 ± 0.32	0.4	-0.61	-0.63	0.12	-0.78
BcaccTSDC17_00470	1.49	1.21	1.45	0.86	0.9	1.18 ± 0.29	-0.03	0.22	0.36	0.14	0.14	0.16 ± 0.14	0.13	-0.11	0.45	1.2	0.14	0.36 ± 0.51	-0.31	0.06	0.92	1.41	1.17	0.65 ± 0.74	1.1	0.55	1.2	1.13	1.13	1.02 ± 0.27	0.23	-0.98	1.02	0.33	0.32	0.3	0.49 ± 0.35	0.2	1.23	0.21	1.11	1.05	1.16	0.88 ± 0.45	1	0.89	0.45	0.79	1.15
BcaccTSDC17_00471	1.66	1.68	1.55	1.71	1.94	1.71 ± 0.14	1.73	1.74	1.68	1.73	1.92	1.76 ± 0.09	1.96	1.83	1.85	2.07	2.01	1.94 ± 0.1	2	2.09	2.35	2.25	2.24	2.18 ± 0.14	2.44	2.34	2.3	1.84	2.45	2.27 ± 0.25	2.02	1.88	1.91	1.78	2.06	1.96	1.92 ± 0.11	2.41	2.26	2.29	1.69	2.07	2.18	2.06 ± 0.26	1.57	2.33	2.2	2.03	2.21
BcaccTSDC17_00472	1.39	1.53	1.7	1.65	1.76	1.61 ± 0.15	1.55	1.65	1.56	1.74	1.68	1.63 ± 0.08	1.63	1.94	1.81	1.77	1.75	1.78 ± 0.11	1.67	1.7	1.94	1.81	1.76	1.78 ± 0.11	1.83	1.84	1.75	1.38	1.49	1.66 ± 0.21	1.36	1.59	1.22	1.48	1.86	1.86	1.61 ± 0.31	1.7	1.78	1.83	1.55	1.69	1.58	1.66 ± 0.13	0.95	1.73	1.49	1.2	1.74
BcaccTSDC17_00473	2.35	2.15	2.47	2.22	2.38	2.31 ± 0.13	2.1	2.09	2.16	2.08	2.26	2.14 ± 0.07	2.3	2.41	1.95	2.25	2.26	2.24 ± 0.17	2.6	1.98	2.47	2.32	2.55	2.39 ± 0.25	2.58	2.45	2.54	2.53	2.6	2.54 ± 0.06	2.75	1.96	2.57	2.52	2.44	2.23	2.44 ± 0.15	2.17	2.67	2.49	2.82	2.71	2.74	2.69 ± 0.14	2.18	2.68	2.55	2.62	2.56
BcaccTSDC17_00501	-	-	-	-	-	-	-	-	-	-	-	-	-	-	-	-	-	-	-	-	-	-	-	-	-0.54	-0.92	-0.93	-0.28	-1.09	-0.75 ± 0.33	0.91	-0.83	0.33	-1.31	-0.43	-1.14	-0.64 ± 0.75	-0.96	1.16	-0.48	0.24	1.11	0.92	0.45 ± 0.72	-0.73	-0.61	-0.03	0.86	-1.08
BcaccTSDC17_00513	0.7	0.74	0.78	0.59	0.8	0.72 ± 0.08	0.93	1.05	0.93	0.78	1.16	0.97 ± 0.14	1.22	1.14	1.08	0.49	1.06	1 ± 0.29	1.2	1.38	1.47	1.3	1.72	1.41 ± 0.2	1.07	0.97	0.89	1.03	0.42	0.88 ± 0.26	1.38	1.75	0.55	1.04	1.14	1.51	1.06 ± 0.4	1.62	0.37	1.25	1.17	0.85	0.75	1 ± 0.25	0.91	0.99	1.38	1.07	0.75
BcaccTSDC17_00550	0.15	-1.32	-1.26	-0.92	-0.85	-0.84 ± 0.59	-1	-0.54	-0.73	-0.53	-0.53	-0.66 ± 0.2	-0.62	-1.13	-0.3	-0.99	-0.57	-0.72 ± 0.33	-0.85	-0.66	-0.27	-0.75	-0.29	-0.56 ± 0.27	-	-	-	-	-	-	-	-	-	-	-	-	-	-	-	-	-	-	-	-	-	-	-	-	-
BcaccTSDC17_00551	-	-	-	-	-	-	-	-	-	-	-	-	-	-	-	-	-	-	-	-	-	-	-	-	-0.72	-0.76	-0.92	-1.16	-0.8	-0.87 ± 0.18	-0.41	-0.83	-1.47	-0.87	-0.68	-0.55	-0.89 ± 0.41	-0.76	-0.99	-0.86	-0.48	-0.59	-0.56	-0.62 ± 0.17	-0.67	-0.51	-0.48	-0.96	-0.53
BcaccTSDC17_00555	-	-	-	-	-	-	-	-	-	-	-	-	-	-	-	-	-	-	-	-	-	-	-	-	-0.69	-1.07	-0.94	0.56	-1.22	-0.67 ± 0.71	-0.73	-0.55	-1.05	-0.61	-0.37	-0.47	-0.62 ± 0.3	-0.46	-0.51	-0.73	-0.84	-0.22	-0.84	-0.66 ± 0.29	-0.79	-0.49	-0.34	-0.58	-0.95
BcaccTSDC17_00560	0.91	-1.45	0.89	1.5	1.87	0.74 ± 1.3	0.17	2.08	-1.24	-1.52	-1.5	-0.4 ± 1.55	2.5	-0.93	-0.74	-0.38	-1.79	-0.27 ± 1.63	-0.17	-0.72	-0.26	-0.71	-0.46	-0.47 ± 0.25	0.33	-0.67	0.83	-1.03	0.26	-0.06 ± 0.77	-0.26	-0.2	0.34	0.55	0.45	-0.52	0.2 ± 0.49	0.09	0.25	0.98	0.15	-0.47	0.53	0.3 ± 0.62	-0.68	-1.16	-0.06	-1.34	-0.07
BcaccTSDC17_00563	-1.69	0.29	0.68	0.54	0.87	0.14 ± 1.05	0.07	-1.05	-1.22	0.36	0.05	-0.36 ± 0.72	-0.95	0.72	0.84	0.07	0.9	0.32 ± 0.78	0.01	0.54	1.28	0.9	-0.93	0.36 ± 0.86	1	0.97	0.92	0.52	0.81	0.84 ± 0.2	0.69	0.78	0.55	0.43	0.6	0.96	0.63 ± 0.23	-0.59	0.73	0.93	0.47	0.55	0.75	0.67 ± 0.21	-1.22	1.02	0.51	0.5	0.76
BcaccTSDC17_00596	-	-	-	-	-	-	-	-	-	-	-	-	-	-	-	-	-	-	-	-	-	-	-	-	-0.91	-0.52	-0.67	-0.6	-0.35	-0.61 ± 0.2	-0.34	-0.74	-1.03	-0.05	-1.11	-0.56	-0.69 ± 0.49	-1.06	-0.67	-0.77	-0.29	-0.29	-0.16	-0.38 ± 0.27	-1.24	-0.35	-0.58	-0.73	-1.19
BcaccTSDC17_00638	-0.43	-0.25	-0.43	0.01	-1.36	-0.49 ± 0.52	-0.22	-0.09	-0.44	-0.72	1.1	-0.07 ± 0.7	0.13	0.12	-0.67	-0.55	-0.53	-0.3 ± 0.39	-0.44	-0.7	-0.59	-0.21	-0.16	-0.42 ± 0.23	-0.63	0.73	-1.61	0.95	-0.66	-0.25 ± 1.07	0.37	-0.82	0.13	0.05	-0.78	-0.34	-0.23 ± 0.42	1.33	0.88	-1.21	0.38	0.25	-1.3	-0.47 ± 0.91	0.1	0.28	0.83	0.27	-0.03
BcaccTSDC17_00643	1.03	0.66	0.76	0.91	1.2	0.91 ± 0.22	0.24	-1.3	0.31	0.41	0.5	0.03 ± 0.75	-0.66	0.57	-0.88	0.23	0.78	0.01 ± 0.74	0.74	0.6	-1.04	0.78	0.87	0.39 ± 0.8	0.99	0.66	0.72	0.75	0.64	0.75 ± 0.14	0.49	-1.29	0.53	0.01	-1.41	0.31	-0.14 ± 0.88	-0.61	0.48	0.43	0.11	0.69	-1.52	-0.07 ± 1	0.46	1.07	0.52	0.5	0.97
BcaccTSDC17_00670	-1.18	-0.47	-0.88	-0.3	-0.3	-0.62 ± 0.39	-0.14	-0.46	-1.08	-0.31	-0.53	-0.5 ± 0.36	-0.92	-1.2	-1.22	-0.89	-0.98	-1.04 ± 0.16	-0.5	-0.51	-1.1	-0.37	-0.87	-0.67 ± 0.3	-	-	-	-	-	-	-	-	-	-	-	-	-	-	-	-	-	-	-	-	-	-	-	-	-
BcaccTSDC17_00671	-0.91	-0.06	-1.15	-0.77	-0.02	-0.58 ± 0.51	-1.02	-0.82	0.67	-0.68	0.66	-0.24 ± 0.83	-0.75	-0.86	-0.81	-0.69	-1.14	-0.85 ± 0.17	-1.08	-0.72	-0.33	-1.09	-1.06	-0.86 ± 0.33	-0.62	-0.7	-0.78	1.14	-1.08	-0.41 ± 0.88	-0.39	-0.75	-0.8	-1.51	-0.73	-0.22	-0.81 ± 0.53	-0.37	0.23	-0.33	0.91	-0.72	0.47	0.08 ± 0.74	-0.68	0.12	-0.42	-0.32	0.38
BcaccTSDC17_00682	1.62	1.5	1.16	1.7	1.96	1.59 ± 0.29	1.9	1.55	1.8	1.94	2.05	1.85 ± 0.19	1.77	1.95	1.78	2.03	1.63	1.83 ± 0.16	2.02	1.75	1.53	2.19	1.61	1.82 ± 0.28	2.19	2.23	1.94	1.72	2	2.02 ± 0.21	2.28	1.97	1.72	1.91	1.95	2.23	1.95 ± 0.21	1.58	2.16	1.91	2.01	1.85	1.82	1.9 ± 0.08	1.63	1.86	1.94	2.04	1.76
BcaccTSDC17_00683	2.17	1.95	1.96	1.97	2.03	2.02 ± 0.09	2	2.08	2.32	2.06	2.06	2.1 ± 0.12	2.42	2.36	2.29	1.51	2	2.11 ± 0.38	2.25	2.35	1.57	1.87	2.2	2.05 ± 0.32	2.42	2.23	1.97	1.92	2.2	2.15 ± 0.21	2.53	2.6	2.28	2.71	2.2	2.4	2.4 ± 0.23	2.23	2.6	2.24	2.46	2.24	2.16	2.28 ± 0.13	1.98	2.29	2.48	2.43	2.12
BcaccTSDC17_00684	2.22	1.86	1.87	1.96	2.02	1.99 ± 0.15	2.15	2.07	2.25	2.18	2.35	2.2 ± 0.11	2.32	2.5	2.45	2.2	2.2	2.33 ± 0.14	2.36	2.55	2.11	2.31	2.33	2.33 ± 0.16	1.98	2.1	1.98	2.15	2.17	2.08 ± 0.09	2.37	2.27	2.06	2.06	2.17	2.52	2.2 ± 0.22	1.8	2.29	2.29	2.34	2.04	2.06	2.18 ± 0.16	2.04	2.44	2.42	2.17	2.05
BcaccTSDC17_00685	1.23	1.47	1.31	1.36	1.36	1.35 ± 0.09	1.39	0.84	1.37	1.24	1.56	1.28 ± 0.27	1.04	1.64	1.62	1.2	1.28	1.36 ± 0.26	0.02	1.07	1.14	-0.14	0.56	0.53 ± 0.59	2.27	1.98	1.74	1.95	1.92	1.97 ± 0.19	2.2	1.08	1.64	1.95	2	2.44	2.01 ± 0.33	1.8	1.96	2.13	1.88	2.05	1.85	1.98 ± 0.13	1.78	2.28	2.39	2.24	1.91
BcaccTSDC17_00687	-	-	-	-	-	-	-	-	-	-	-	-	-	-	-	-	-	-	-	-	-	-	-	-	-0.61	-0.42	0.18	-0.03	-0.24	-0.22 ± 0.31	0.42	-0.26	-0.4	0.08	-0.39	0.21	-0.13 ± 0.31	-0.06	0.12	-0.43	-0.08	-0.64	-0.7	-0.46 ± 0.28	0.31	-0.62	-0.69	-0.2	-0.05
BcaccTSDC17_00692	-0.62	-0.29	0.38	-0.28	-1.78	-0.52 ± 0.8	0.11	0.61	0.62	0.13	-0.42	0.21 ± 0.43	1.11	-0.3	0.27	-0.1	-0.8	0.03 ± 0.71	-0.62	-0.48	-0.05	-0.37	-0.4	-0.39 ± 0.21	-0.57	-1.92	0.4	0	-0.14	-0.45 ± 0.89	0.7	0.87	0.67	0.17	0.43	0.54	0.45 ± 0.22	-0.02	0.03	-1.19	0.42	0.39	0.24	-0.04 ± 0.77	0.52	-0.3	-0.11	0.09	0.34
BcaccTSDC17_00693	1.67	0.66	0.64	-1.16	-1.64	0.03 ± 1.38	-0.24	-0.46	-1	-0.81	-0.61	-0.63 ± 0.3	0.71	-0.57	-0.25	-1.23	1.05	-0.06 ± 0.93	2.49	0.04	-0.91	-0.46	-0.03	0.23 ± 1.32	-0.74	-0.47	0.3	0.12	0.46	-0.07 ± 0.52	0.48	0.73	1.08	0.55	-0.69	-0.71	0.06 ± 0.9	-0.36	-1.17	-0.86	-1.08	-0.52	0.82	-0.41 ± 0.85	0.88	-1	-0.73	-0.92	1.14
BcaccTSDC17_00709	-	-	-	-	-	-	-	-	-	-	-	-	-	-	-	-	-	-	-	-	-	-	-	-	-0.57	-0.53	-1.16	-1.6	-0.73	-0.92 ± 0.45	-0.49	-1.19	0.04	-0.49	-1.11	-0.82	-0.6 ± 0.49	-1.06	-0.47	-0.28	-0.89	-0.9	-0.88	-0.74 ± 0.3	-0.31	-0.48	-0.64	-1.04	-0.59
BcaccTSDC17_00717	-0.84	0.52	-0.67	0.1	-0.87	-0.35 ± 0.63	-0.73	-0.83	-1.13	-0.65	-0.59	-0.78 ± 0.21	-1.36	-0.81	-0.56	-0.83	-1.28	-0.97 ± 0.34	-0.72	-0.52	-0.33	-0.84	-0.99	-0.68 ± 0.26	-	-	-	-	-	-	-	-	-	-	-	-	-	-	-	-	-	-	-	-	-	-	-	-	-
BcaccTSDC17_00757	-	-	-	-	-	-	-	-	-	-	-	-	-	-	-	-	-	-	-	-	-	-	-	-	1	-0.57	-0.42	-0.95	-1.11	-0.41 ± 0.84	-0.43	-0.65	-0.52	-1.32	-0.2	-0.5	-0.64 ± 0.48	-0.77	-0.94	0.65	-0.22	-0.61	-1.18	-0.34 ± 0.77	-1.02	-0.79	-0.3	-0.42	-0.72
BcaccTSDC17_00759	-	-	-	-	-	-	-	-	-	-	-	-	-	-	-	-	-	-	-	-	-	-	-	-	-0.7	-0.76	-0.48	-0.89	-0.57	-0.68 ± 0.16	-0.79	-0.86	-0.88	-0.54	-0.96	-0.73	-0.78 ± 0.18	-0.88	-0.7	-0.77	-0.66	-0.69	-0.55	-0.67 ± 0.09	-0.65	-1.29	-0.72	-0.66	-0.28
BcaccTSDC17_00760	-0.81	-0.53	0.47	0.9	0.97	0.2 ± 0.82	0.26	0.8	-0.82	-0.76	-0.33	-0.17 ± 0.69	-0.6	-1.22	-0.25	-1.16	-0.72	-0.79 ± 0.4	-0.63	-0.66	0.26	0.14	0.07	-0.16 ± 0.44	-1.17	0.51	1.16	-1.41	1.15	0.05 ± 1.25	-0.36	-0.82	0.42	1.14	-0.73	-0.4	0.11 ± 0.84	-0.22	1.22	1.26	-1.51	0.1	-1.58	-0.43 ± 1.37	1.39	0.77	1.62	1.56	1.27
BcaccTSDC17_00761	-0.75	-0.08	-1.11	0.06	-0.24	-0.42 ± 0.49	-0.14	-0.96	0.29	2.77	-1.5	0.09 ± 1.65	-0.88	0.11	-0.96	-0.27	-0.36	-0.47 ± 0.44	-0.4	0.93	0.39	-0.71	-0.62	-0.08 ± 0.71	-0.56	-0.46	-0.91	-0.88	-1.38	-0.84 ± 0.36	-1.07	-0.48	-0.19	-0.23	-0.86	-0.95	-0.56 ± 0.4	-0.48	-0.84	-0.38	-0.55	-0.59	-0.48	-0.5 ± 0.09	-0.77	-0.21	-0.37	-1.08	-0.6
BcaccTSDC17_00764	-	-	-	-	-	-	-	-	-	-	-	-	-	-	-	-	-	-	-	-	-	-	-	-	-1.36	0.95	1.4	1.25	1.74	0.8 ± 1.24	1.05	-0.98	1.16	1.48	1.92	1.23	1.45 ± 0.34	2.26	1.58	1.78	1.28	1.36	1.66	1.52 ± 0.23	1.58	1.34	1.9	1.62	1.76
BcaccTSDC17_00787	0.92	-0.83	-1.5	-1.36	0.11	-0.53 ± 1.03	-0.27	0.32	0.82	0.56	0.63	0.41 ± 0.42	0.17	0.01	0.29	-1.24	-0.54	-0.26 ± 0.63	-0.07	-0.93	-0.33	0.63	-1.2	-0.38 ± 0.73	0.37	0.26	-0.16	-0.14	0.4	0.15 ± 0.27	1.09	-0.64	0.45	0.61	0.71	0.72	0.62 ± 0.13	-0.19	0.53	-0.62	0.4	0.19	0.02	0 ± 0.44	-1.02	1.11	0.44	0.45	0.55
BcaccTSDC17_00788	-	-	-	-	-	-	-	-	-	-	-	-	-	-	-	-	-	-	-	-	-	-	-	-	-0.88	-0.61	-0.66	-0.59	0.02	-0.54 ± 0.34	-0.89	-0.63	-0.31	0.49	-0.41	-0.61	-0.21 ± 0.48	-0.74	1.66	-0.75	-0.31	-0.75	-0.95	-0.69 ± 0.27	-0.71	-0.22	-0.81	0.24	0.19
BcaccTSDC17_00826	-0.49	0.19	-1.33	0.45	0.24	-0.19 ± 0.73	0.01	-0.97	-0.99	-1.11	-0.73	-0.76 ± 0.45	-0.63	0.73	0.19	-0.06	-0.16	0.01 ± 0.5	-0.1	-0.89	-0.64	0.01	-0.12	-0.35 ± 0.39	-	-	-	-	-	-	-	-	-	-	-	-	-	-	-	-	-	-	-	-	-	-	-	-	-
BcaccTSDC17_00877	-	-	-	-	-	-	-	-	-	-	-	-	-	-	-	-	-	-	-	-	-	-	-	-	-0.75	-0.94	-0.91	-0.12	-1.43	-0.83 ± 0.47	-0.9	-0.52	-0.77	-0.52	-0.96	-0.67	-0.73 ± 0.18	-0.8	-0.59	-0.61	-0.57	-0.96	-0.42	-0.64 ± 0.23	-0.82	-0.29	-0.71	-0.63	-1.3
BcaccTSDC17_00903	-1.1	-2.04	-0.62	0.17	0.76	-0.57 ± 1.09	0.12	0.98	0.22	-0.11	0.01	0.24 ± 0.43	0.6	-1.11	-0.73	-0.19	1.13	-0.06 ± 0.93	1.59	0.3	-0.8	0.68	0.98	0.55 ± 0.89	0.7	-1.19	-0.59	-0.18	0.41	-0.17 ± 0.76	0.47	-0.99	0.69	0.35	0.61	-0.83	0.2 ± 0.7	1.11	0.84	0.9	0.53	0.18	0.3	0.48 ± 0.32	-0.01	0.37	0.44	0.32	0.76
BcaccTSDC17_00904	-	-	-	-	-	-	-	-	-	-	-	-	-	-	-	-	-	-	-	-	-	-	-	-	-0.53	-0.3	-0.94	-1.2	-0.75	-0.74 ± 0.35	-0.18	-0.6	0.24	-0.63	-1.03	-0.83	-0.56 ± 0.56	-0.9	0.01	-0.68	0.15	-0.98	-1.02	-0.63 ± 0.54	-0.98	-0.22	-0.9	-0.41	0.31
BcaccTSDC17_00910	-	-	-	-	-	-	-	-	-	-	-	-	-	-	-	-	-	-	-	-	-	-	-	-	-0.78	-0.82	-0.83	-0.96	-0.79	-0.84 ± 0.07	-0.86	-0.37	-1.19	-0.67	-0.76	-0.59	-0.8 ± 0.27	-0.69	-0.24	-0.64	0.46	-0.77	-0.6	-0.39 ± 0.57	-0.89	-0.49	-0.81	-0.64	-0.75
BcaccTSDC17_00920	-0.69	-1.74	-0.93	-1.3	-0.67	-1.07 ± 0.45	-0.7	-0.65	-0.57	0.3	-0.87	-0.5 ± 0.46	-0.58	-0.69	-0.7	-0.49	-0.35	-0.56 ± 0.15	-1.12	-1.18	-0.61	-0.7	-0.49	-0.82 ± 0.31	-0.46	-1.12	-1.08	0.38	-1.31	-0.72 ± 0.69	-0.58	-0.84	-0.62	-0.8	-0.17	-0.01	-0.4 ± 0.37	-0.8	-0.72	0.12	-0.43	-1.13	-0.59	-0.51 ± 0.52	-0.73	-0.38	0.62	0.62	-0.82
BcaccTSDC17_00924	-1.15	-1.06	-1	0.21	0.63	-0.47 ± 0.83	-0.77	-0.69	-1.6	-0.67	-0.6	-0.87 ± 0.41	-0.84	-0.32	-0.33	-0.71	-0.8	-0.6 ± 0.26	-0.51	-0.33	-1.71	-1.09	-0.9	-0.91 ± 0.54	-0.77	-0.79	-0.56	-0.69	-0.33	-0.63 ± 0.19	-0.6	-0.84	-0.9	-0.57	-0.86	-1	-0.83 ± 0.19	-0.84	-0.92	-0.93	-0.69	-1.4	-0.99	-1 ± 0.3	-1.24	-0.3	-1.06	-1.37	-0.62
BcaccTSDC17_00933	-0.85	0.05	-0.81	-0.86	-0.96	-0.68 ± 0.41	-0.67	-0.64	-0.59	-0.96	-1.26	-0.83 ± 0.28	-0.69	-0.77	-0.48	-0.08	-0.76	-0.56 ± 0.29	-1.1	-1.05	-0.84	-0.83	-0.4	-0.85 ± 0.28	-1.29	-0.81	-0.32	0.26	-0.16	-0.46 ± 0.6	-0.95	2.99	-0.16	0.39	-0.8	0.88	0.08 ± 0.72	-0.15	-0.11	0.21	0.4	0.07	0.28	0.24 ± 0.14	-0.31	0.16	0.5	-0.72	-0.74
BcaccTSDC17_00997	0.45	-0.65	0.65	-0.58	-0.36	-0.1 ± 0.61	-0.74	-0.8	-1.1	-0.21	-0.35	-0.64 ± 0.36	-0.48	-0.64	0.69	-1.05	0.55	-0.19 ± 0.76	-0.19	-0.51	-0.06	-0.82	0.02	-0.31 ± 0.35	-0.29	-0.67	-0.85	1.06	-0.18	-0.19 ± 0.75	0	-0.36	0.31	-0.68	-0.42	-0.3	-0.27 ± 0.42	-0.55	-0.38	-0.69	0.36	-0.43	-0.35	-0.28 ± 0.45	-0.17	-0.43	-0.1	0.18	-0.7
BcaccTSDC17_01006	-	-	-	-	-	-	-	-	-	-	-	-	-	-	-	-	-	-	-	-	-	-	-	-	-0.12	0.25	-0.72	-0.66	-0.31	-0.31 ± 0.4	-0.65	-0.48	-0.41	0.23	0.22	-0.15	-0.03 ± 0.31	-0.34	-0.72	-0.15	-0.47	-0.11	-0.68	-0.35 ± 0.27	-0.41	-0.54	-0.31	-0.42	-0.58
BcaccTSDC17_01011	-0.26	-0.61	-0.02	-0.21	-0.37	-0.29 ± 0.22	-0.87	-0.56	-0.41	-1.27	-0.99	-0.82 ± 0.34	-1.21	-0.89	-0.89	-1.23	-0.89	-1.02 ± 0.18	-0.95	-0.77	-0.83	-1.05	-0.38	-0.8 ± 0.26	-0.74	0.22	0.37	0.35	0	0.04 ± 0.46	-0.48	-0.84	0.71	-1.47	0.76	0.66	0.16 ± 1.09	-0.39	-0.17	-0.22	-1.14	0.73	0.57	-0.01 ± 0.86	0.64	-0.95	-0.5	-1.68	-0.62
BcaccTSDC17_01012	0.8	0.47	0.69	0.75	0.67	0.68 ± 0.13	-0.15	0.1	0.87	0.22	-0.11	0.19 ± 0.41	0.65	0.88	0.49	-1.15	-1.34	-0.09 ± 1.06	-0.78	0.74	0.69	0.8	0.81	0.45 ± 0.69	0.58	0.25	0.8	1.29	-0.96	0.39 ± 0.85	-0.86	-0.67	-1.07	-1.33	-0.75	-0.59	-0.94 ± 0.33	-0.51	-0.33	-0.66	-0.51	-0.59	-0.76	-0.63 ± 0.1	0.62	-1.19	-0.55	0.32	-0.75
BcaccTSDC17_01013	-0.96	-1.43	0.43	0.61	0.43	-0.18 ± 0.94	0.13	-0.04	0.12	0.22	-0.19	0.05 ± 0.16	-0.47	-1.22	0.06	-0.57	-0.7	-0.58 ± 0.46	-0.23	-0.28	0.96	-0.19	0.62	0.18 ± 0.58	-0.52	-0.46	0.14	-0.24	-1.38	-0.49 ± 0.56	-0.04	0.36	-0.99	-0.15	-0.73	-0.48	-0.59 ± 0.36	-0.75	0.56	-0.11	-1.32	-0.67	0.36	-0.43 ± 0.72	-0.93	0.8	0.58	0.11	0.74
BcaccTSDC17_01014	-	-	-	-	-	-	-	-	-	-	-	-	-	-	-	-	-	-	-	-	-	-	-	-	-0.49	0.75	1.37	1.41	0.65	0.74 ± 0.77	-0.19	-0.37	-1.52	-0.62	-0.36	-0.31	-0.7 ± 0.57	-0.59	-0.99	-0.72	-0.86	-0.76	-0.86	-0.8 ± 0.07	0.32	-0.49	-0.13	-0.58	-0.62
BcaccTSDC17_01020	-	-	-	-	-	-	-	-	-	-	-	-	-	-	-	-	-	-	-	-	-	-	-	-	-0.53	-1.02	-0.71	-0.78	-0.21	-0.65 ± 0.3	-0.39	-0.88	-0.86	-0.94	-0.91	-0.11	-0.7 ± 0.4	-0.44	-0.78	-1.24	-0.61	-0.78	-0.88	-0.88 ± 0.27	-0.76	-0.66	-1.08	-0.38	-0.17
BcaccTSDC17_01061	-0.12	1.11	1.18	1.23	1.07	0.9 ± 0.57	0.66	0.47	0.56	0.42	-1.16	0.19 ± 0.76	0.67	-0.07	0.72	0.52	0.74	0.52 ± 0.34	-0.52	0.86	0.59	0.82	0.26	0.4 ± 0.57	1.39	1.69	1.64	1.71	1.94	1.67 ± 0.19	2.2	2.04	1.99	2.13	1.82	1.72	1.91 ± 0.18	1.98	1.74	1.94	1.96	2.03	2.05	1.99 ± 0.05	1.94	2.09	2.14	2.13	2.07
BcaccTSDC17_01064	-0.45	-2.06	-0.09	-0.07	-1.27	-0.79 ± 0.86	-0.12	-0.84	0.61	-1.06	-0.65	-0.41 ± 0.67	-0.34	0.44	-0.52	0.38	0.71	0.13 ± 0.54	0.09	0.09	0.12	-0.61	1.27	0.19 ± 0.68	0.89	0.81	-0.4	-0.6	-0.49	0.04 ± 0.74	-0.51	1.42	0.65	-2.19	-0.14	0.13	-0.39 ± 1.25	-0.03	-0.27	0.67	-0.61	-0.28	-0.9	-0.28 ± 0.68	0.36	-0.9	-1	1.1	-0.77
BcaccTSDC17_01112	0.65	-0.94	-1.17	-0.53	-1.45	-0.69 ± 0.82	-0.68	0.12	-0.1	-0.04	-0.63	-0.27 ± 0.36	0.21	0.4	-0.45	-0.61	-0.75	-0.24 ± 0.51	-0.61	0.1	0.02	0.09	0.2	-0.04 ± 0.33	-	-	-	-	-	-	-	-	-	-	-	-	-	-	-	-	-	-	-	-	-	-	-	-	-
BcaccTSDC17_01126	-0.78	0.15	-0.24	-0.63	-0.92	-0.48 ± 0.43	-0.32	-1.14	-0.57	-0.55	-0.54	-0.62 ± 0.3	-0.66	-1.09	-0.52	-0.98	-1.11	-0.87 ± 0.27	-1.08	-0.58	-1.03	-0.99	-0.86	-0.91 ± 0.2	-	-	-	-	-	-	-	-	-	-	-	-	-	-	-	-	-	-	-	-	-	-	-	-	-
BcaccTSDC17_01142	-	-	-	-	-	-	-	-	-	-	-	-	-	-	-	-	-	-	-	-	-	-	-	-	-0.74	-0.62	-0.58	-0.9	-0.12	-0.59 ± 0.29	-0.44	0.26	0.34	-0.18	0.48	-0.25	0.1 ± 0.37	0.37	0.21	0.16	0.13	0.59	0.85	0.43 ± 0.35	-0.19	-0.36	-0.76	-0.38	0.39
BcaccTSDC17_01145	-	-	-	-	-	-	-	-	-	-	-	-	-	-	-	-	-	-	-	-	-	-	-	-	-0.51	-0.9	-0.44	-1.4	-0.18	-0.69 ± 0.47	-0.8	-0.87	-0.96	-0.54	-0.9	-0.69	-0.77 ± 0.19	-1.06	-0.2	-0.5	-0.79	-0.24	-0.97	-0.63 ± 0.32	-0.57	-0.94	-0.67	-0.98	-1.06
BcaccTSDC17_01148	-	-	-	-	-	-	-	-	-	-	-	-	-	-	-	-	-	-	-	-	-	-	-	-	-0.52	-1.24	-0.56	-0.73	-0.47	-0.7 ± 0.31	-0.09	-0.88	-1.36	-1.38	-0.72	-0.41	-0.97 ± 0.48	-0.45	-0.52	-0.72	-0.63	-0.56	-0.15	-0.51 ± 0.25	1.36	-0.35	-0.55	-0.59	-0.19
BcaccTSDC17_01153	0.02	-1.11	0.08	-1.14	-0.94	-0.62 ± 0.62	0.26	-0.85	-1.49	-0.83	-0.83	-0.75 ± 0.63	-1.09	-0.83	-1.03	-0.95	-0.71	-0.92 ± 0.15	-1.29	-1.32	-0.5	-0.58	-0.92	-0.93 ± 0.38	-0.35	-0.63	-0.23	-0.58	-1.29	-0.62 ± 0.41	-0.27	-0.79	-0.98	-0.43	-0.59	-0.3	-0.58 ± 0.29	-0.66	-0.23	-0.28	0.59	0.52	-0.72	0.03 ± 0.63	-0.93	-1	-1.05	-0.98	-0.18
BcaccTSDC17_01157	-	-	-	-	-	-	-	-	-	-	-	-	-	-	-	-	-	-	-	-	-	-	-	-	-0.8	-0.9	-0.84	-0.5	0.56	-0.49 ± 0.61	0.08	-0.91	0.22	-1.11	-0.62	-0.67	-0.54 ± 0.55	0.66	1.23	-0.14	0.83	-0.39	-0.7	-0.1 ± 0.66	-1.19	-0.31	-0.79	-1.04	0.57
BcaccTSDC17_01162	-	-	-	-	-	-	-	-	-	-	-	-	-	-	-	-	-	-	-	-	-	-	-	-	-0.29	0.71	-1	-0.65	0.18	-0.21 ± 0.67	-0.22	-0.74	-1.03	0.48	-0.55	-0.65	-0.44 ± 0.65	-0.68	-1.1	-0.01	-0.98	-0.72	-0.62	-0.58 ± 0.41	-0.29	-0.21	-0.61	-0.07	-0.55
BcaccTSDC17_01168	-0.91	-0.25	-0.82	-1.68	-1.49	-1.03 ± 0.57	-0.01	-0.73	0.17	0.52	0.55	0.1 ± 0.52	-0.38	-0.55	-0.4	0.4	-0.5	-0.29 ± 0.39	-0.65	0.37	-0.08	-1.15	-0.54	-0.41 ± 0.58	0.27	-0.4	0.51	-1	-1.09	-0.34 ± 0.73	-0.25	-0.17	-0.58	-0.91	-0.12	0.32	-0.32 ± 0.54	-0.33	0.45	0.07	-0.34	-0.37	-0.58	-0.31 ± 0.27	0.6	-0.69	-0.18	-0.33	-0.77
BcaccTSDC17_01174	-	-	-	-	-	-	-	-	-	-	-	-	-	-	-	-	-	-	-	-	-	-	-	-	-0.66	-0.49	0	-0.27	-0.54	-0.39 ± 0.26	-0.91	-0.86	-0.26	-0.13	-0.31	-0.79	-0.37 ± 0.29	-0.74	0.59	-0.67	-0.95	-0.99	-0.49	-0.77 ± 0.24	-0.95	-0.5	-0.58	-0.24	-0.41
BcaccTSDC17_01180	-0.81	0.27	-0.03	-0.92	0.05	-0.29 ± 0.54	0.11	-0.45	0.04	-0.75	-1.01	-0.41 ± 0.49	-0.35	-0.61	-0.67	0.69	-0.63	-0.31 ± 0.58	-0.7	-0.64	-0.61	-0.74	-0.6	-0.66 ± 0.06	-0.75	0.18	-0.82	-1.04	0.07	-0.47 ± 0.56	-0.93	-0.64	-1.09	0.13	-0.9	-0.54	-0.6 ± 0.54	-1.12	-0.36	-1.15	-0.75	-0.38	-0.35	-0.66 ± 0.38	-0.34	-1	-1.12	-0.69	-0.54
BcaccTSDC17_01183	0.99	0.47	0.83	1.13	0.29	0.74 ± 0.36	0.37	0.89	0.67	0.82	0.78	0.7 ± 0.2	1.18	1.24	0.69	0.61	1	0.94 ± 0.28	1.93	1.55	0.83	0.07	0.89	1.06 ± 0.72	0.84	0.49	1.06	0.84	1.53	0.95 ± 0.38	1.95	2.29	1.45	1.46	1.4	1.84	1.54 ± 0.2	1.59	1.67	1.64	1.54	1.63	1.18	1.5 ± 0.22	1.63	1.43	1.68	1.78	1.53
BcaccTSDC17_01186	-	-	-	-	-	-	-	-	-	-	-	-	-	-	-	-	-	-	-	-	-	-	-	-	-1	-0.5	0.39	-0.62	-1.51	-0.65 ± 0.7	-0.62	-0.27	-0.44	-0.91	-0.74	-0.07	-0.54 ± 0.37	-0.66	-0.61	-1.06	-0.98	0.57	0.24	-0.31 ± 0.83	0.19	0.94	-0.19	0.65	0.46
BcaccTSDC17_01192	0	-0.26	-0.91	-0.42	-0.92	-0.5 ± 0.41	-1.11	-0.96	-0.81	-0.51	-0.91	-0.86 ± 0.22	-0.71	-0.77	-0.87	-0.62	-0.79	-0.75 ± 0.09	-0.53	-0.49	-0.7	-1.29	0.74	-0.45 ± 0.74	-	-	-	-	-	-	-	-	-	-	-	-	-	-	-	-	-	-	-	-	-	-	-	-	-
BcaccTSDC17_01234	0.26	-0.06	-0.14	0.03	0.14	0.04 ± 0.16	-0.48	0.03	-0.9	-0.28	-0.94	-0.51 ± 0.42	0.19	-0.06	-0.66	-1.22	-0.38	-0.43 ± 0.55	-0.87	1.08	0	-0.17	0.19	0.05 ± 0.7	0.45	-0.24	-0.7	0.48	-0.68	-0.14 ± 0.58	-0.18	0.22	-0.8	-1.6	-0.42	-0.3	-0.78 ± 0.59	0.1	-0.02	-0.43	-1.07	0.81	0.45	-0.06 ± 0.85	0.36	-1.07	0.49	0.36	0.06
BcaccTSDC17_01264	-0.58	-0.22	0	0.09	0.25	-0.09 ± 0.32	-0.14	-0.85	0.11	-0.14	0.3	-0.14 ± 0.44	-0.28	-0.6	0.1	0.16	-0.04	-0.13 ± 0.31	-0.25	-0.09	-0.22	0.13	-0.52	-0.19 ± 0.24	0.68	0.46	0.32	1	0.21	0.53 ± 0.31	-0.8	-0.24	0.63	-1.13	0.5	1.11	0.28 ± 0.97	-0.04	0.87	0.5	-1.31	-1.58	-1.37	-0.94 ± 0.97	-1.12	0.59	-1.57	0.27	0.14
BcaccTSDC17_01266	-0.67	0.16	0.41	0.11	-0.81	-0.16 ± 0.54	-1.25	-0.88	-0.47	-0.75	-0.87	-0.85 ± 0.28	-0.26	-0.73	-0.8	-0.66	-0.93	-0.68 ± 0.25	-0.49	-0.87	-0.51	-0.82	-0.75	-0.69 ± 0.17	-0.13	1.5	0.56	0.49	-0.36	0.41 ± 0.72	-0.83	-0.62	-0.72	-1.05	-0.4	-0.71	-0.72 ± 0.27	-0.81	0.1	-0.43	-0.55	-0.24	-0.5	-0.43 ± 0.14	-0.54	-0.44	-0.33	-0.61	-1
BcaccTSDC17_01267	-0.78	0.35	0.26	0.23	0.3	0.07 ± 0.48	-0.95	-1.18	-0.4	-1.02	-1.42	-0.99 ± 0.38	-0.54	-0.62	0.24	-1.06	0.22	-0.35 ± 0.57	0.98	0.09	-0.48	-0.56	-0.42	-0.08 ± 0.64	0.49	-0.63	-1.19	-0.93	-0.95	-0.64 ± 0.66	-1.07	-1.09	-0.7	-0.26	-0.62	-0.99	-0.64 ± 0.3	-1.5	-0.18	-0.26	-0.57	-0.93	-1.19	-0.74 ± 0.41	-0.58	-0.36	-1.69	-1.05	-0.54
BcaccTSDC17_01275	-0.85	-1.22	0.86	0.47	-0.12	-0.17 ± 0.87	-0.29	-0.88	-0.37	-0.21	-0.9	-0.53 ± 0.33	-0.9	-1.02	-0.56	-1.07	-0.9	-0.89 ± 0.2	-0.8	-1.08	-0.93	-0.39	-0.94	-0.83 ± 0.26	0.26	-0.14	1.07	0.73	0.24	0.43 ± 0.47	-0.16	0	-0.95	0.07	0.03	0.63	-0.06 ± 0.65	0.26	-0.41	-0.09	-1.04	-1.14	-0.88	-0.79 ± 0.48	-0.09	-0.16	-0.82	0.39	-0.5
BcaccTSDC17_01286	1.44	1.53	1.42	1.51	1.75	1.53 ± 0.13	1.57	1.5	1.71	1.46	1.56	1.56 ± 0.1	1.53	1.37	1.35	1.42	1.45	1.43 ± 0.07	1.55	1.21	1.48	1.73	0.95	1.38 ± 0.31	1.31	2.27	0.91	1.62	1.49	1.52 ± 0.5	1.03	1.59	1.23	1.47	1.25	1.15	1.27 ± 0.14	1.33	0.83	1.48	1.3	-0.25	0.16	0.67 ± 0.85	1.53	1.05	1.27	1.2	0.11
BcaccTSDC17_01288	-	-	-	-	-	-	-	-	-	-	-	-	-	-	-	-	-	-	-	-	-	-	-	-	-1.07	-0.87	-0.44	-1.39	-0.75	-0.9 ± 0.36	-0.97	0.17	0.11	-0.61	-0.94	-0.72	-0.54 ± 0.46	-0.95	-0.97	-0.93	-1	-1.05	-0.41	-0.85 ± 0.29	-1.22	-0.54	-0.86	-0.67	-0.91
BcaccTSDC17_01291	-0.49	-0.24	0.3	0.03	-0.05	-0.09 ± 0.3	-1.64	0.35	-0.71	-1.02	-0.93	-0.79 ± 0.72	0.39	-0.61	0.15	0.29	-0.52	-0.06 ± 0.47	-0.56	-0.93	-0.72	-0.24	-0.54	-0.6 ± 0.26	-0.84	-0.29	0.23	-0.69	0.86	-0.15 ± 0.7	-0.77	-1.01	-0.41	-0.51	-0.37	-0.66	-0.49 ± 0.13	-0.62	-0.8	-0.35	-0.88	-1.15	-0.4	-0.7 ± 0.39	-0.72	-0.7	-0.96	-0.62	-0.69
BcaccTSDC17_01298	-0.22	0.57	-0.12	0.32	0.02	0.11 ± 0.33	0.48	0.25	-0.33	-0.64	0.1	-0.03 ± 0.45	-0.8	0.22	0.31	0.17	0.06	-0.01 ± 0.45	-0.17	-0.95	0.09	0.54	0.78	0.06 ± 0.67	0.62	0.72	0.46	0.78	-0.02	0.51 ± 0.32	-0.69	0.11	0.92	-0.02	0.42	-0.46	0.22 ± 0.59	-0.41	0.01	0.38	0	0.26	0.25	0.22 ± 0.16	0.31	0.08	-0.08	0.29	0.2
BcaccTSDC17_01301	0.69	-0.11	-1.24	-1.07	-0.86	-0.52 ± 0.8	-0.82	-1.31	-0.77	0.11	-0.3	-0.62 ± 0.54	-0.62	-0.38	-0.64	0.2	-0.41	-0.37 ± 0.34	-0.52	-0.72	-0.63	-1.2	-1.08	-0.83 ± 0.3	0.35	0.5	-0.24	-0.56	0.01	0.01 ± 0.43	-0.09	-0.31	-0.38	0.41	-0.45	-0.56	-0.25 ± 0.45	-0.08	-1.04	-0.45	0.28	-0.88	0.13	-0.23 ± 0.53	-0.03	-0.74	0.4	0.09	-0.16
BcaccTSDC17_01341	-1.17	0.19	-0.03	-1.13	-0.61	-0.55 ± 0.62	-0.73	0.57	-0.07	-0.19	-0.06	-0.1 ± 0.46	0.63	-0.58	-1.39	-1.8	0.59	-0.51 ± 1.11	1.38	0.09	0.96	0.14	0.39	0.59 ± 0.56	-0.42	-1.3	-1.38	0.48	-0.17	-0.56 ± 0.79	0.21	-0.09	-0.3	-0.14	-0.29	-0.75	-0.37 ± 0.27	-0.31	0.25	-0.52	-0.81	0.78	0.18	-0.09 ± 0.71	0.52	-0.13	-0.12	-0.9	0.49
BcaccTSDC17_01342	-	-	-	-	-	-	-	-	-	-	-	-	-	-	-	-	-	-	-	-	-	-	-	-	-0.82	-0.7	0.38	-0.88	-1.23	-0.65 ± 0.61	-1.1	0.05	-0.74	-0.8	-0.43	-1.08	-0.76 ± 0.26	-0.42	-0.58	-0.6	0.28	-0.43	-0.58	-0.33 ± 0.42	0.44	-0.51	0.37	-0.84	-1.46
BcaccTSDC17_01373	-0.81	0.22	0.24	0.05	0.4	0.02 ± 0.48	-1.25	-0.69	-0.36	-0.9	-0.7	-0.78 ± 0.33	1.66	-0.68	-1.22	-1.34	-0.41	-0.4 ± 1.21	-0.64	1.68	-0.69	-0.56	-0.51	-0.14 ± 1.02	-0.56	-0.79	-0.8	-0.75	-0.16	-0.61 ± 0.27	-0.74	-0.51	-0.65	-0.6	-0.14	-0.75	-0.53 ± 0.27	-0.44	-1.34	-0.91	-0.97	0.08	0.19	-0.4 ± 0.62	-0.14	0.64	-0.31	-0.38	-0.79
BcaccTSDC17_01411	0.64	0.73	0.52	0.98	0.56	0.69 ± 0.18	0.49	0.26	0.64	0.51	0.62	0.51 ± 0.15	0.71	0.97	0.36	0.57	0.65	0.65 ± 0.22	0.9	0.72	1.19	0.3	-0.48	0.53 ± 0.65	0.53	0.76	-1.19	-1.12	0.72	-0.06 ± 1	0.66	0.65	0.65	0.54	0.47	0.75	0.61 ± 0.13	-0.26	1.13	0.44	0.63	0.73	-0.71	0.27 ± 0.67	0.7	-0.9	0.4	0.64	0.97
BcaccTSDC17_01412	-	-	-	-	-	-	-	-	-	-	-	-	-	-	-	-	-	-	-	-	-	-	-	-	-1.18	-0.21	-0.6	-0.31	-1.14	-0.69 ± 0.45	-0.37	-0.33	-0.05	0.16	-1.05	-0.51	-0.37 ± 0.54	-0.47	0.75	-0.69	1.13	0.27	-0.55	0.04 ± 0.84	-1	-0.6	-1.03	-0.59	0.35
BcaccTSDC17_01490	-1.13	-0.23	-0.38	-0.13	-1.36	-0.65 ± 0.56	0.33	-0.36	-0.36	0.03	0.11	-0.05 ± 0.31	-1.15	-0.07	-0.49	-0.65	0.04	-0.47 ± 0.48	-0.63	-0.94	-0.8	-0.76	-0.67	-0.76 ± 0.12	0.09	0.9	-0.19	-1.15	-0.35	-0.14 ± 0.74	-0.69	0.59	-0.63	-0.43	-0.84	-0.81	-0.68 ± 0.19	-0.5	-0.9	-0.21	-0.68	-0.82	-0.52	-0.56 ± 0.26	-0.61	-1.01	-0.53	-0.11	-1.44
BcaccTSDC17_01514	-	-	-	-	-	-	-	-	-	-	-	-	-	-	-	-	-	-	-	-	-	-	-	-	-0.77	-1.09	-0.65	-0.61	-0.54	-0.73 ± 0.22	-0.56	-0.34	-0.11	-0.46	-0.53	-0.32	-0.35 ± 0.19	-0.96	-1.07	-0.63	-0.13	-0.77	-1.2	-0.68 ± 0.44	-0.46	-0.85	-0.67	-0.69	-0.76
BcaccTSDC17_01515	-0.95	-1.88	-1.76	-0.98	0.14	-1.08 ± 0.81	-0.67	1.38	-0.95	0.62	0.38	0.15 ± 0.96	0.28	0.26	-0.52	0.24	-0.93	-0.13 ± 0.56	1.43	-0.9	1.8	0.83	1.66	0.96 ± 1.11	-1.53	-0.66	-0.49	-0.97	-1.1	-0.95 ± 0.4	-1.42	-0.85	-0.96	0.38	-0.92	-0.76	-0.57 ± 0.63	0.07	-1.1	-0.99	-1.11	-0.77	-0.24	-0.78 ± 0.38	-1.02	-0.16	-0.91	0.65	-0.39
BcaccTSDC17_01517	1.32	1.11	1.18	1.41	1.34	1.27 ± 0.12	1.28	1.38	1.78	1.37	1.36	1.43 ± 0.2	1.57	1.54	1.66	1.41	1.64	1.56 ± 0.1	0.31	1.8	1.89	1.94	1.93	1.57 ± 0.71	1.49	1.41	1.1	0.83	0.92	1.15 ± 0.29	1.04	1.96	0.92	0.98	1.35	1.4	1.16 ± 0.25	0.76	0.53	1.53	0.9	0.84	1.19	1.12 ± 0.32	1.12	0.66	1.34	0.8	0.4
BcaccTSDC17_01518	-0.02	0.2	0.15	0.18	-0.23	0.05 ± 0.18	0.64	-0.7	-0.33	-1.2	0.27	-0.26 ± 0.74	0.16	-0.38	0.3	0.38	-0.71	-0.05 ± 0.48	-0.21	-0.28	0.14	-0.42	-1.24	-0.4 ± 0.51	-0.97	0.52	0.03	-0.72	-1.84	-0.6 ± 0.92	-0.49	0.61	-1.3	-1.73	-0.86	-0.95	-1.21 ± 0.4	0.97	0.52	-1.61	0.67	0.58	0.75	0.1 ± 1.14	0.35	0.82	0.57	0.44	0.93
BcaccTSDC17_01534	-	-	-	-	-	-	-	-	-	-	-	-	-	-	-	-	-	-	-	-	-	-	-	-	-0.88	-0.62	-0.35	0.28	-0.93	-0.5 ± 0.49	-1.26	-0.82	-0.86	-0.53	-0.93	-0.51	-0.71 ± 0.22	-0.96	-0.93	-0.7	-0.63	-0.86	-0.64	-0.71 ± 0.1	-0.76	-1.06	-0.74	-0.84	-1.05
BcaccTSDC17_01551	-	-	-	-	-	-	-	-	-	-	-	-	-	-	-	-	-	-	-	-	-	-	-	-	-0.76	-0.6	-0.88	-0.24	-0.75	-0.64 ± 0.25	-0.82	-0.84	0.73	-0.77	-1.03	-0.4	-0.37 ± 0.78	-0.43	-0.15	-0.71	0.07	-0.3	0.19	-0.19 ± 0.41	-1.07	-0.39	-0.29	-0.53	-0.88
BcaccTSDC17_01567	1.35	0.54	-1.61	-1.84	-1.17	-0.55 ± 1.41	0.6	-0.79	-1.1	-1.25	-0.95	-0.7 ± 0.74	1.7	1.37	1.26	0.84	1.24	1.28 ± 0.31	-0.18	-1.28	0.07	-0.54	-0.23	-0.43 ± 0.52	-0.64	-0.58	-0.89	-1.13	-0.6	-0.77 ± 0.24	-0.62	-0.75	-0.66	-0.66	-1.09	-0.53	-0.73 ± 0.24	-0.42	-1.15	-0.74	-0.56	-0.81	0.13	-0.49 ± 0.43	-0.94	-1.17	-0.73	1.13	-0.37
BcaccTSDC17_01568	-	-	-	-	-	-	-	-	-	-	-	-	-	-	-	-	-	-	-	-	-	-	-	-	-0.99	-0.66	-0.57	0.07	-0.48	-0.53 ± 0.38	-0.82	0.02	-0.49	0.37	-1.21	-0.06	-0.35 ± 0.67	0.04	-0.87	-0.84	0.45	-0.11	0.52	0.01 ± 0.63	-0.59	-0.27	-0.22	0.14	-0.6
BcaccTSDC17_01616	-0.78	-0.23	-0.66	-0.93	-0.04	-0.53 ± 0.38	-0.85	-1.01	-0.78	-0.93	-0.86	-0.89 ± 0.09	-0.86	-0.69	-1.01	-1.31	-0.94	-0.96 ± 0.23	-0.85	-0.88	-1.3	-1.21	-1.05	-1.06 ± 0.2	0.17	-0.37	-0.61	-0.74	-0.03	-0.32 ± 0.38	-0.6	-0.44	-1.12	-0.07	-0.78	-0.78	-0.69 ± 0.44	-0.84	0.02	-0.94	0.26	-1.45	-0.7	-0.71 ± 0.72	-1.39	-0.68	-0.69	-1.09	0.44
BcaccTSDC17_01621	-	-	-	-	-	-	-	-	-	-	-	-	-	-	-	-	-	-	-	-	-	-	-	-	-0.98	-1.06	-0.98	-1.56	-0.33	-0.98 ± 0.44	-1.06	-0.98	-1.21	-0.52	-0.67	-0.5	-0.72 ± 0.33	-0.98	-0.68	-0.74	-0.74	-0.82	-1.01	-0.83 ± 0.13	-0.52	-0.73	-1.21	-0.6	-0.72
BcaccTSDC17_01671	-	-	-	-	-	-	-	-	-	-	-	-	-	-	-	-	-	-	-	-	-	-	-	-	-0.92	-0.97	-1.04	-0.76	-0.55	-0.85 ± 0.2	-0.3	-0.49	0.13	-0.95	-0.27	-0.11	-0.3 ± 0.46	-0.93	0.04	-0.14	0.8	0.59	-0.14	0.28 ± 0.49	-0.99	0.66	0	-0.07	0.54
BcaccTSDC17_01682	-1.09	-1.03	-0.84	-0.78	-1.12	-0.97 ± 0.15	-0.56	-1.06	-1.06	-1.01	-0.86	-0.91 ± 0.21	-0.86	-0.57	-0.86	-1.15	-0.67	-0.82 ± 0.22	-0.68	-1.11	-1.33	-0.94	-0.95	-1 ± 0.24	-0.51	-0.75	-0.96	-1.07	-1.19	-0.9 ± 0.27	-0.31	-0.93	-0.76	-0.76	-0.3	-0.92	-0.68 ± 0.27	-0.12	0.61	-0.7	-0.82	0.72	0.16	-0.16 ± 0.73	-0.45	-0.39	-0.56	0.54	-0.54
BcaccTSDC17_01690	-	-	-	-	-	-	-	-	-	-	-	-	-	-	-	-	-	-	-	-	-	-	-	-	-0.82	-0.47	-1.05	-0.64	-0.21	-0.64 ± 0.32	-0.9	-0.65	-1.02	-0.45	-1.02	-0.76	-0.81 ± 0.27	-1.18	-0.65	-0.53	-0.72	-1.11	-0.62	-0.75 ± 0.26	-0.64	-0.74	-0.54	0.36	-0.94
BcaccTSDC17_01698	-	-	-	-	-	-	-	-	-	-	-	-	-	-	-	-	-	-	-	-	-	-	-	-	-0.23	-0.77	-0.64	-0.35	-0.66	-0.53 ± 0.23	-1.04	-0.14	-0.79	-0.43	-0.75	-0.61	-0.65 ± 0.16	-0.81	-0.91	-0.76	-0.84	-1.07	-0.39	-0.76 ± 0.28	-0.39	-0.52	-0.68	-0.48	-0.48
BcaccTSDC17_01699	-	-	-	-	-	-	-	-	-	-	-	-	-	-	-	-	-	-	-	-	-	-	-	-	-0.73	-0.71	-0.6	-0.7	-0.55	-0.66 ± 0.08	-1.05	-0.71	-0.68	-0.46	-1.02	-0.96	-0.78 ± 0.26	-1.03	-0.8	-0.78	-0.78	-0.6	-0.55	-0.68 ± 0.12	-1.74	-1.27	-0.93	-1.01	-1.04
BcaccTSDC17_01702	-	-	-	-	-	-	-	-	-	-	-	-	-	-	-	-	-	-	-	-	-	-	-	-	-0.46	-0.44	-0.57	-1.02	-0.69	-0.63 ± 0.24	-0.98	-0.61	-0.64	-0.49	-1.29	-0.85	-0.82 ± 0.35	-0.83	-0.63	-0.89	-0.42	-0.78	-0.79	-0.72 ± 0.2	-0.7	-0.53	-0.46	-0.61	-0.36
BcaccTSDC17_01741	-0.14	0.58	0.56	0.42	0.67	0.42 ± 0.32	0.73	1.31	0.85	0.81	0.63	0.87 ± 0.26	0.96	0.76	0.9	0.71	0.76	0.82 ± 0.11	-0.64	0.71	0.85	0.82	1.06	0.56 ± 0.68	0.76	1	1.01	1.27	1.05	1.02 ± 0.18	1.1	-0.46	1.37	1.29	1.11	1.21	1.25 ± 0.11	-0.72	1.43	1.03	1.52	1.5	1.38	1.36 ± 0.23	1.33	1.4	1.25	1.35	1.59
BcaccTSDC17_01742	0.38	-0.41	-0.58	-1.38	0	-0.4 ± 0.66	-0.09	-1.04	-0.14	0.27	0.24	-0.15 ± 0.53	0.26	-0.26	-0.09	-0.89	0.24	-0.15 ± 0.47	0.24	0.06	0.63	0.11	0.34	0.27 ± 0.22	-0.8	0.16	-0.19	-0.36	-0.39	-0.32 ± 0.35	0.35	1.33	-0.25	-0.17	0.37	0.5	0.11 ± 0.38	0.41	-0.76	-0.42	-0.17	-0.13	-0.1	-0.2 ± 0.15	-0.02	0.28	0.06	-0.07	0.14
BcaccTSDC17_01743	-	-	-	-	-	-	-	-	-	-	-	-	-	-	-	-	-	-	-	-	-	-	-	-	-0.35	-0.18	-0.08	-0.79	-0.17	-0.31 ± 0.28	0.51	1.22	0.34	0.44	-0.59	0.14	0.08 ± 0.47	0.51	-0.41	0.27	0.21	0.37	0.46	0.33 ± 0.11	-1.38	0.17	-0.8	-0.74	0.6
BcaccTSDC17_01744	0.92	0.89	0.5	0.42	0.23	0.59 ± 0.3	0.34	-0.79	-0.68	0.44	0.37	-0.06 ± 0.61	0.43	0.31	0.72	0.61	0.58	0.53 ± 0.16	1.02	0.69	0.68	0.07	0.01	0.49 ± 0.44	0.99	0.29	0.84	0.98	0.64	0.75 ± 0.29	0.88	1.28	0.93	0.75	0.62	0.84	0.78 ± 0.13	1.26	0.93	-0.23	0.86	1.3	1.21	0.78 ± 0.7	0.65	0.6	0.71	0.96	0.96
BcaccTSDC17_01745	0.28	0.49	1.41	0.93	0.75	0.77 ± 0.43	0.51	0.83	0.1	0.33	-0.05	0.34 ± 0.34	0.24	0.72	0.59	0.22	0.63	0.48 ± 0.23	1.33	0.45	-0.29	0.19	0.93	0.52 ± 0.63	1.48	1.25	1.39	1.4	1.41	1.38 ± 0.08	1.82	1.81	1.42	1.44	1.21	1.56	1.41 ± 0.14	1.86	1.53	1.49	1.62	1.49	1.71	1.58 ± 0.11	1.43	1.97	1.45	1.76	1.57
BcaccTSDC17_01763	0.08	-1.86	-1.18	-1.15	-1.39	-1.1 ± 0.72	0.95	0.32	0.83	-0.08	-1.33	0.14 ± 0.92	-0.19	-0.84	-0.5	-0.31	-1.04	-0.58 ± 0.36	0.75	-1.04	-1.17	-0.13	-0.72	-0.46 ± 0.79	-0.93	-0.71	-0.83	-0.98	-1.06	-0.9 ± 0.13	-0.85	-0.08	-0.94	0.52	-0.46	-0.85	-0.43 ± 0.67	-1.36	-0.69	-0.98	-0.19	0.78	0.9	0.13 ± 0.88	-1.34	-1.25	-0.51	-1.14	0.06
BcaccTSDC17_01802	0.48	-0.56	-0.47	-1.43	0.15	-0.37 ± 0.74	-0.21	0.78	0.92	0.45	0.39	0.47 ± 0.44	0.97	0.87	1.04	-0.1	0.53	0.66 ± 0.47	1.16	-0.03	0.74	0.47	-0.77	0.31 ± 0.74	-0.76	1.73	0.52	-0.33	-1.56	-0.08 ± 1.26	-0.68	1.78	-0.97	1.01	-0.57	-0.18	-0.18 ± 0.85	-0.64	-0.54	-0.35	-1.06	-0.85	-0.49	-0.69 ± 0.32	-0.71	-0.57	-0.36	0.57	-0.99
BcaccTSDC17_01811	-1.18	-1.23	-0.91	-0.53	-0.5	-0.87 ± 0.34	-0.34	-0.79	-0.73	-0.83	-0.56	-0.65 ± 0.2	-1.24	-0.57	-0.53	-0.89	-0.5	-0.75 ± 0.32	-0.87	-0.88	-0.63	-0.62	-0.62	-0.72 ± 0.14	-0.57	-0.62	-0.4	-0.72	-0.81	-0.62 ± 0.16	-0.37	-0.33	1.05	-0.52	-1.21	-0.31	-0.25 ± 0.95	-0.88	-0.85	-0.53	-0.87	-0.72	-0.49	-0.65 ± 0.18	-0.65	-0.47	-0.52	-0.74	-1.19
BcaccTSDC17_01814	-	-	-	-	-	-	-	-	-	-	-	-	-	-	-	-	-	-	-	-	-	-	-	-	-0.91	-0.48	-0.14	0.6	-0.67	-0.32 ± 0.59	-0.9	-0.59	-1.1	0.35	0.26	-0.17	-0.16 ± 0.67	-0.91	-1.1	0.23	-0.69	-0.93	-0.6	-0.5 ± 0.5	-0.59	-0.09	-0.65	-0.17	-0.21
BcaccTSDC17_01817	0.86	-0.84	0.54	0.84	1.21	0.52 ± 0.8	0.45	0.2	0.63	0.72	0.7	0.54 ± 0.22	-0.88	0.66	0.97	0.91	0.72	0.48 ± 0.77	0.95	0.7	0.82	0.99	-0.7	0.55 ± 0.71	-1.23	0.62	0.44	-0.2	0.93	0.11 ± 0.86	0.93	0.62	0.93	0.74	0.42	-0.85	0.31 ± 0.8	0.88	0.46	0.03	0.01	0.05	0.77	0.21 ± 0.37	0.87	0.94	0.55	1.06	1.08
BcaccTSDC17_01822	1.58	1.89	1.64	1.88	1.66	1.73 ± 0.15	1.9	1.55	1.8	1.63	1.8	1.74 ± 0.14	1.82	1.81	1.85	2.08	1.76	1.87 ± 0.13	1.71	2.05	1.84	1.8	2	1.88 ± 0.14	2.21	2.23	1.82	1.7	1.9	1.97 ± 0.24	1.95	2.09	1.27	2.04	2.2	2.2	1.93 ± 0.44	2.3	1.72	2.09	1.78	2.02	2.03	1.98 ± 0.14	2.01	1.25	2.1	1.77	1.79
BcaccTSDC17_01854	-0.84	-0.06	-0.03	0.17	-0.21	-0.2 ± 0.39	-1.21	-0.12	0.42	-1.09	-0.9	-0.58 ± 0.7	-0.58	-0.41	-1.01	-0.95	-0.57	-0.7 ± 0.26	-0.59	-0.82	-0.66	-0.32	-0.5	-0.58 ± 0.19	-	-	-	-	-	-	-	-	-	-	-	-	-	-	-	-	-	-	-	-	-	-	-	-	-
BcaccTSDC17_01855	0.14	-0.26	0.22	-0.25	-0.87	-0.2 ± 0.43	-0.91	-0.83	-0.16	-0.58	-0.16	-0.53 ± 0.36	-0.63	-1.05	-0.52	-0.87	-0.12	-0.64 ± 0.36	-0.67	-0.94	-0.38	-0.73	-0.81	-0.7 ± 0.21	0.45	-0.57	0.9	-0.7	-0.76	-0.14 ± 0.76	-0.96	-0.73	-0.85	-0.56	-0.61	-0.37	-0.6 ± 0.2	-0.64	-0.72	-0.02	-0.58	-0.73	-0.38	-0.43 ± 0.31	-1.01	-0.13	-0.71	-0.67	-0.96
BcaccTSDC17_01862	-0.63	-1.11	-0.75	-1.07	0.55	-0.6 ± 0.68	-1.07	-0.71	-0.62	-0.4	-0.56	-0.67 ± 0.25	-0.75	-0.72	-0.71	-1.05	-0.55	-0.76 ± 0.18	-0.53	-0.76	-0.87	-0.85	-1.12	-0.82 ± 0.21	-0.72	-0.55	-0.24	-0.39	0.03	-0.38 ± 0.29	-0.82	-0.88	-1.09	-0.1	-0.37	-0.32	-0.47 ± 0.43	-0.82	-0.55	-0.54	-0.89	-0.97	-0.56	-0.74 ± 0.22	0.5	-0.47	-1.05	-0.68	-0.58
BcaccTSDC17_01882	-1.11	-0.27	-1.01	-0.74	0.03	-0.62 ± 0.49	-0.55	-0.78	-0.79	-0.84	-0.68	-0.73 ± 0.12	-0.92	-0.63	-0.47	0.21	-0.78	-0.52 ± 0.44	-0.66	-0.65	-0.83	-0.8	-0.66	-0.72 ± 0.09	-0.52	-0.64	-0.76	-0.81	-0.25	-0.59 ± 0.22	-0.71	-0.99	-0.86	-0.88	-0.96	-0.7	-0.85 ± 0.11	-0.9	-0.54	-0.96	-0.83	-0.55	-0.83	-0.79 ± 0.17	-0.65	-0.43	-0.87	-0.5	-0.85
BcaccTSDC17_01893	-1.06	-1.43	-0.06	-1.23	-0.56	-0.87 ± 0.55	-0.82	-0.37	-0.09	-0.36	-1.02	-0.53 ± 0.38	-1.39	-0.73	-0.95	-0.58	-0.59	-0.85 ± 0.34	-0.54	-1.1	-0.14	-0.31	-0.79	-0.58 ± 0.38	0.89	1.05	-1.55	-0.78	0.4	0 ± 1.13	-0.31	-0.23	-1.08	0.29	0.52	-0.35	-0.15 ± 0.72	-0.26	-1.33	1.14	0.21	0.77	0.52	0.66 ± 0.4	0.78	-0.91	0.89	0.6	-1.27
BcaccTSDC17_01894	-	-	-	-	-	-	-	-	-	-	-	-	-	-	-	-	-	-	-	-	-	-	-	-	-0.42	-0.94	-0.98	-0.82	-0.52	-0.74 ± 0.25	-0.59	-0.85	-0.26	-0.64	-0.67	-0.89	-0.61 ± 0.26	-0.8	-0.31	-0.56	-0.65	-1.04	0.12	-0.53 ± 0.48	-0.71	-1.21	-0.88	-1.05	-0.59
BcaccTSDC17_01909	-0.91	0.21	-1.33	0.29	-1.29	-0.6 ± 0.8	-1.04	-0.49	-0.12	-0.68	-0.99	-0.66 ± 0.38	-0.79	-0.34	-0.25	-0.42	-0.04	-0.37 ± 0.28	-0.96	-0.67	-0.7	-0.34	-0.19	-0.57 ± 0.31	-0.58	0.87	0.16	0.1	-1.82	-0.25 ± 1.01	1.18	0.8	0.51	0.14	1.17	-0.31	0.38 ± 0.62	1.81	-1.45	-1.27	-0.58	1.01	-1.29	-0.53 ± 1.08	0.98	-1.31	1.06	0.83	-0.88
BcaccTSDC17_01932	-1.04	-1.56	0.14	-0.16	-0.53	-0.63 ± 0.68	-0.95	-0.29	-0.59	-0.5	-0.25	-0.52 ± 0.28	-0.94	-1.11	-0.63	-1.15	-0.24	-0.81 ± 0.38	-0.34	-0.1	-0.63	-0.72	-0.74	-0.51 ± 0.28	-0.22	-0.99	-0.62	-1.03	-1.05	-0.78 ± 0.36	-0.99	-0.46	0.75	-0.96	-0.17	-0.64	-0.25 ± 0.75	-0.62	-1.1	-0.07	-0.46	-0.8	0.62	-0.18 ± 0.61	-0.76	-0.44	-0.59	-0.78	-0.76
BcaccTSDC17_01948	-0.9	-0.5	-0.67	-1.04	-0.19	-0.66 ± 0.33	-1.16	-0.49	-1.17	-1.21	-0.65	-0.94 ± 0.34	-1.2	-1.18	-0.54	0.38	-0.82	-0.67 ± 0.65	-0.45	-1.03	-1.09	-1.07	-0.64	-0.86 ± 0.29	-	-	-	-	-	-	-	-	-	-	-	-	-	-	-	-	-	-	-	-	-	-	-	-	-
BcaccTSDC17_01952	-1.04	1.36	1.31	1.53	1.48	0.93 ± 1.1	1.48	1.28	1.45	1.44	1.42	1.41 ± 0.08	1.5	1.6	1.47	1.5	1.6	1.54 ± 0.06	0.63	1.76	1.48	1.81	1.9	1.52 ± 0.52	-	-	-	-	-	-	-	-	-	-	-	-	-	-	-	-	-	-	-	-	-	-	-	-	-
BcaccTSDC17_01953	-	-	-	-	-	-	-	-	-	-	-	-	-	-	-	-	-	-	-	-	-	-	-	-	-0.29	0.47	-0.16	0.08	0.2	0.06 ± 0.3	0.47	0.64	-0.79	0.22	0.12	0.29	-0.04 ± 0.5	0.18	-0.23	0.45	0.32	-0.52	0.09	0.08 ± 0.43	-0.02	0.05	0.16	0.49	-0.6
BcaccTSDC17_01955	-	-	-	-	-	-	-	-	-	-	-	-	-	-	-	-	-	-	-	-	-	-	-	-	-0.57	-0.64	0.07	-1.18	-0.05	-0.47 ± 0.5	0.16	-0.32	-1.1	-0.24	1.94	2.34	0.74 ± 1.67	-0.23	-0.32	-0.08	-1.51	-0.45	-0.51	-0.64 ± 0.61	0.33	-0.61	0.26	0.48	-1.02
BcaccTSDC17_01960	1.37	1.38	1.44	1.57	1.38	1.43 ± 0.09	0.85	1.46	1.34	0.72	1.27	1.13 ± 0.32	1.78	1.68	1.31	1.33	1.39	1.5 ± 0.22	2.03	1.3	1.68	1.35	1.68	1.61 ± 0.3	1.73	1.62	1.63	1.21	1.5	1.54 ± 0.2	1.58	1.68	-1.24	1.5	1.41	1.34	0.75 ± 1.33	1.91	1.43	1.57	1.14	1.57	1.35	1.41 ± 0.21	1.66	1.51	1.47	1.38	1.51
BcaccTSDC17_01970	1.21	-0.34	-1	-1.46	-0.95	-0.51 ± 1.04	0.06	-0.42	-0.37	-0.74	0.4	-0.22 ± 0.44	-1.07	-0.4	-0.53	-0.82	-0.58	-0.68 ± 0.27	0.13	-0.94	-0.17	0.22	-0.49	-0.25 ± 0.47	-	-	-	-	-	-	-	-	-	-	-	-	-	-	-	-	-	-	-	-	-	-	-	-	-
BcaccTSDC17_01978	1.09	0.52	0.45	0.29	0.3	0.53 ± 0.33	-1.12	0.55	0.63	-1.56	-1.36	-0.57 ± 1.07	0.42	0.92	0.72	0.51	1.25	0.77 ± 0.33	1.57	0.73	-0.49	-0.85	-0.93	0 ± 1.1	-0.12	-0.4	0.39	-0.59	-0.68	-0.28 ± 0.43	-0.24	0.78	-0.69	-0.78	0.46	-0.94	-0.49 ± 0.64	-0.27	-0.56	-0.57	-0.93	-1.23	-0.46	-0.8 ± 0.35	-0.51	-0.6	-0.84	-1.16	-1.02
BcaccTSDC17_01998	1.09	-0.16	-0.63	1.49	-0.1	0.34 ± 0.91	-1.58	-0.58	0.81	-1.44	-1.27	-0.81 ± 0.98	-0.62	0.19	-0.92	-1.27	2.35	-0.05 ± 1.45	-0.19	2.1	-0.16	-0.74	0.96	0.4 ± 1.14	0.69	-0.68	-0.74	-1.25	1.47	-0.1 ± 1.14	-0.7	-0.89	-0.68	-0.68	-0.75	-0.74	-0.71 ± 0.04	-0.44	-0.99	-0.9	-0.8	-1.22	-0.57	-0.87 ± 0.27	-1	-0.44	-0.29	-0.8	-0.81
BcaccTSDC17_02054	1.14	0.15	0.43	-0.54	-0.06	0.23 ± 0.62	-1.61	-0.81	-1.52	-1.03	-1.05	-1.21 ± 0.34	-0.06	0.19	0.77	0.1	0.41	0.28 ± 0.32	0.5	0.81	-0.31	-0.37	-0.46	0.03 ± 0.58	-0.34	-0.06	-0.79	-0.59	0.34	-0.29 ± 0.45	-0.47	0.54	1.6	0.21	-0.5	-0.29	0.26 ± 0.95	0.16	1.13	0.31	0.3	-0.45	0.06	0.06 ± 0.36	-0.6	-0.84	-0.93	-0.54	-0.89
BcaccTSDC17_02061	-0.6	-0.42	0.19	-0.06	-0.1	-0.2 ± 0.31	-1.59	-0.2	-0.36	0.5	-1.16	-0.56 ± 0.82	-0.08	-0.6	0.09	-0.84	-0.3	-0.34 ± 0.38	-0.4	0.12	-0.26	0.14	-0.53	-0.18 ± 0.3	0.9	0.38	0.19	-0.67	-1.8	-0.2 ± 1.06	-0.56	0.07	-0.78	0.15	-0.22	-0.69	-0.38 ± 0.43	-1.05	-0.88	0.86	-1.01	-0.45	-1.33	-0.48 ± 0.97	-1.19	1	0.78	-0.64	0.3
BcaccTSDC17_02067	-	-	-	-	-	-	-	-	-	-	-	-	-	-	-	-	-	-	-	-	-	-	-	-	1.03	0.74	0.74	1.21	0.51	0.85 ± 0.28	-0.76	-0.42	-1.52	0.45	0.52	1.14	0.15 ± 1.16	1.69	0.53	0.92	0.48	-1.66	-1.96	-0.55 ± 1.47	-1.75	0.9	-1.49	0.73	0.48
BcaccTSDC17_02115	-	-	-	-	-	-	-	-	-	-	-	-	-	-	-	-	-	-	-	-	-	-	-	-	-1	-0.78	-1.07	-0.37	0.91	-0.46 ± 0.81	-0.74	-0.93	-1	-0.27	-0.79	-0.56	-0.65 ± 0.31	-1.02	-0.55	-0.99	-0.86	-0.72	-1.33	-0.97 ± 0.26	-0.58	-0.9	-0.32	-0.45	-0.93
BcaccTSDC17_02122	-0.74	-0.86	-0.91	-0.37	-1.11	-0.8 ± 0.28	-0.24	-0.06	-0.01	0.1	-0.12	-0.07 ± 0.13	-0.11	0.11	-0.23	0.34	0.78	0.18 ± 0.4	0.21	-0.79	0.18	0.3	-0.54	-0.13 ± 0.5	-	-	-	-	-	-	-	-	-	-	-	-	-	-	-	-	-	-	-	-	-	-	-	-	-
BcaccTSDC17_02125	-0.3	0.65	-1.18	-1.3	-0.91	-0.61 ± 0.8	-1.12	-1.04	-0.67	-0.48	-0.73	-0.81 ± 0.27	-1.02	-0.67	0.35	-0.54	-0.59	-0.5 ± 0.51	-0.86	-0.77	-0.67	-0.82	-0.02	-0.63 ± 0.35	0.82	-1.16	0.84	1.42	0.68	0.52 ± 0.98	-0.55	0.02	-1.3	-0.14	-0.88	-0.67	-0.75 ± 0.48	1.68	-0.42	-0.58	0.65	-0.81	0.52	-0.06 ± 0.75	0.45	-0.81	0.8	-1.12	-0.55
BcaccTSDC17_02126	-	-	-	-	-	-	-	-	-	-	-	-	-	-	-	-	-	-	-	-	-	-	-	-	-0.21	-0.55	-1.11	-0.53	-1.04	-0.69 ± 0.38	-0.48	-0.16	-0.59	-0.95	-0.59	-0.62	-0.69 ± 0.18	-0.46	-0.64	-0.6	-0.47	-0.79	-0.76	-0.65 ± 0.15	-0.66	-0.74	-0.42	-1.17	0.07
BcaccTSDC17_02131	-0.33	1.18	0.34	-1.1	0.15	0.05 ± 0.84	-1.01	-1.03	-0.41	-0.62	-1.06	-0.83 ± 0.29	-0.37	-0.47	-0.47	-0.81	-0.73	-0.57 ± 0.19	-0.8	-0.46	-0.4	-0.81	-0.38	-0.57 ± 0.22	-	-	-	-	-	-	-	-	-	-	-	-	-	-	-	-	-	-	-	-	-	-	-	-	-
BcaccTSDC17_02132	-0.42	-1.4	-1.46	-1.89	-1.63	-1.36 ± 0.56	-0.35	0.84	0.64	0.44	0.23	0.36 ± 0.45	-0.7	0.56	0.5	0.14	0.32	0.16 ± 0.51	1.48	0.53	0.99	0.84	-0.92	0.58 ± 0.91	-1.17	-0.08	-0.25	-0.62	-0.41	-0.51 ± 0.42	1.57	1.93	-0.85	-0.05	0.33	-0.54	-0.28 ± 0.52	-0.18	-0.12	-0.99	0.13	-0.69	1.49	-0.01 ± 1.11	0.96	-1.2	-0.91	-0.85	-0.69
BcaccTSDC17_02165	-0.94	-0.03	-0.1	-1.54	-0.07	-0.54 ± 0.68	-1.83	-0.26	0.65	0.26	-1.05	-0.45 ± 1	-0.56	0.2	0.69	-0.09	0.87	0.23 ± 0.58	0.89	0.69	-0.7	0.16	-0.14	0.18 ± 0.64	-	-	-	-	-	-	-	-	-	-	-	-	-	-	-	-	-	-	-	-	-	-	-	-	-
BcaccTSDC17_02166	-	-	-	-	-	-	-	-	-	-	-	-	-	-	-	-	-	-	-	-	-	-	-	-	-0.45	-0.56	-0.72	-0.98	-0.51	-0.64 ± 0.21	-0.52	-0.71	0.53	-0.42	-0.37	-0.52	-0.2 ± 0.49	-0.97	0.06	-0.85	0.27	0.2	-1.01	-0.35 ± 0.68	-0.9	-0.41	-0.03	-0.5	0.61
BcaccTSDC17_02167	-0.2	0	-0.81	-0.45	-0.54	-0.4 ± 0.31	0.31	0.24	-0.62	-0.41	-0.2	-0.14 ± 0.4	-0.47	-1.25	-0.49	-0.93	-0.89	-0.81 ± 0.33	-0.84	0.02	-0.45	-0.78	-0.44	-0.5 ± 0.34	-0.85	0.5	0.48	-1.27	-0.17	-0.26 ± 0.79	-0.64	0.95	0.47	-0.4	-0.66	-0.74	-0.33 ± 0.56	1.19	0.33	-1.07	1.17	-0.25	-0.88	-0.26 ± 1.01	-0.98	0.65	0.55	-0.77	0.79
BcaccTSDC17_02169	-0.07	0.37	0	0.28	0.34	0.18 ± 0.2	-0.05	0.38	-0.82	0.34	0.24	0.02 ± 0.5	-0.71	-1.12	0.16	-0.16	-0.04	-0.38 ± 0.53	-0.05	0.18	-0.14	-0.4	-0.73	-0.23 ± 0.35	-0.25	0.31	-0.14	0.33	-0.13	0.03 ± 0.28	0.6	1.49	-0.22	-0.14	0.3	-0.05	-0.03 ± 0.23	-0.13	0.34	0.56	-0.49	-0.32	-1.47	-0.43 ± 0.83	0.27	0.05	0.07	0.35	0.09
BcaccTSDC17_02170	0.36	-0.22	-0.04	-0.49	-0.23	-0.12 ± 0.31	0.56	0.12	-0.09	-0.04	-0.36	0.04 ± 0.34	0.09	0.15	0.63	0	0.54	0.28 ± 0.28	0.69	0.42	-0.38	-0.46	-0.01	0.05 ± 0.5	-0.17	0.13	-0.54	0.68	0.39	0.1 ± 0.48	0.59	0.7	0.7	1.12	0.98	0.9	0.93 ± 0.18	0.88	0.41	0.75	0.61	0.7	0.56	0.65 ± 0.08	0.52	0.54	0.5	0.39	0.33
BcaccTSDC17_02183	-0.84	0.54	-0.06	0.16	-0.56	-0.15 ± 0.55	-1.23	-0.58	-1.13	-0.92	-0.87	-0.95 ± 0.25	-0.6	-1.21	-0.95	-0.64	-0.37	-0.76 ± 0.33	-0.95	-0.3	-0.83	-0.5	-1.07	-0.73 ± 0.32	-0.16	-0.57	-1.31	-0.62	0.49	-0.43 ± 0.66	-0.12	-0.61	0.97	0.17	1.02	-0.44	0.43 ± 0.7	0.46	-0.57	0.06	-0.63	-0.78	-0.63	-0.5 ± 0.37	-0.93	0.49	0.5	0.54	-1.03
BcaccTSDC17_02191	0.95	0.95	0.75	0.52	1	0.83 ± 0.2	0.34	-0.45	-0.29	0.39	0.48	0.1 ± 0.43	0.31	0.3	0.29	0.83	0.62	0.47 ± 0.24	0.37	1.05	0.61	0.68	1.15	0.77 ± 0.32	0.83	0.78	1.03	1.45	1.25	1.07 ± 0.28	1.48	-0.88	0.82	-1.05	-1.08	-1.02	-0.58 ± 0.94	1.64	0.97	-1.37	0.94	1.06	0.75	0.35 ± 1.15	1.14	0.98	1.04	0.26	0.67
BcaccTSDC17_02197	-	-	-	-	-	-	-	-	-	-	-	-	-	-	-	-	-	-	-	-	-	-	-	-	-1.64	-0.94	-0.92	0.85	-0.86	-0.7 ± 0.93	-1.12	-0.98	-0.01	-0.34	-1.26	-1.16	-0.69 ± 0.62	-0.84	-0.75	-0.83	-0.27	-0.77	-1.04	-0.73 ± 0.33	-1.22	-1.06	-1.35	-0.39	-0.99
BcaccTSDC17_02217	0.67	0.66	0.45	0.55	0.53	0.57 ± 0.09	0.42	0.17	0.43	0.45	0.35	0.36 ± 0.11	-0.11	0.73	-0.17	0.53	0.1	0.22 ± 0.4	0.94	0.74	0.72	1.05	0.71	0.83 ± 0.15	0.95	-0.12	0.48	0.89	0.57	0.56 ± 0.43	0.66	0.07	-0.32	-1.58	-0.77	0.32	-0.59 ± 0.8	0.42	0.55	0.47	0.58	0.57	0.63	0.56 ± 0.07	0.56	0.39	-0.58	0.19	1.06
BcaccTSDC17_02234	-0.78	-1.17	0.34	-1	0.02	-0.52 ± 0.66	0.24	-0.84	-1.16	-1.23	-0.61	-0.72 ± 0.59	-0.8	-0.81	-0.75	-0.32	-0.57	-0.65 ± 0.21	-0.06	-0.83	-0.28	-0.34	-0.49	-0.4 ± 0.29	-1.33	-0.49	0.9	-0.23	-0.41	-0.31 ± 0.8	-0.44	-0.42	-0.95	-0.84	-0.08	-0.99	-0.72 ± 0.43	-0.55	-0.39	0.33	-0.51	-0.59	-0.76	-0.38 ± 0.49	-1.21	-0.67	-0.5	-1.15	-0.81
BcaccTSDC17_02245	-	-	-	-	-	-	-	-	-	-	-	-	-	-	-	-	-	-	-	-	-	-	-	-	0.94	0.61	0.41	1.02	0.27	0.65 ± 0.33	-0.23	-0.58	-1.15	-0.03	-0.79	-1.05	-0.76 ± 0.51	-0.69	-0.87	0.1	-1.33	0.06	-0.22	-0.35 ± 0.67	-0.83	-0.3	-0.53	-0.9	-0.96
BcaccTSDC17_02265	-	-	-	-	-	-	-	-	-	-	-	-	-	-	-	-	-	-	-	-	-	-	-	-	-0.32	-0.71	-0.64	0.89	-1.04	-0.36 ± 0.75	-0.56	-0.72	-0.85	-0.9	-1.1	-0.44	-0.82 ± 0.28	-0.72	-0.91	-0.35	-0.95	-0.56	-0.62	-0.62 ± 0.25	-0.4	-0.58	-0.62	-0.74	-0.36
BcaccTSDC17_02288	-0.77	0.04	-0.21	0.36	0.8	0.04 ± 0.59	-1.34	-0.15	-0.85	-0.79	-0.5	-0.73 ± 0.44	-0.24	-0.14	-0.22	-0.94	-0.29	-0.37 ± 0.32	-0.17	-0.5	-0.73	-0.39	-0.07	-0.37 ± 0.26	-	-	-	-	-	-	-	-	-	-	-	-	-	-	-	-	-	-	-	-	-	-	-	-	-
BcaccTSDC17_02310	-0.09	-0.8	-0.46	0.52	-1.53	-0.47 ± 0.77	-0.05	-0.07	-0.1	-0.71	0.27	-0.13 ± 0.36	0.41	-1.05	-0.63	0.32	0.4	-0.11 ± 0.68	-0.21	-0.33	-0.67	1.06	0.54	0.08 ± 0.71	0.63	-0.33	0.44	-1.02	-0.93	-0.24 ± 0.76	-0.75	0.52	1.72	0.68	-0.66	0.15	0.47 ± 1	1.44	-1.27	-0.42	0.87	1.17	1.06	0.67 ± 0.74	0.67	-1.23	0.08	0.85	1.28
BcaccTSDC17_02340	1.2	-1.18	0.4	-0.73	-0.69	-0.2 ± 0.97	-1.41	-0.97	-0.53	-0.61	-1.16	-0.94 ± 0.37	-1.03	-0.01	-0.86	-0.36	-0.66	-0.58 ± 0.41	-0.85	-0.64	-1.12	-0.46	-0.09	-0.63 ± 0.39	-1.21	-0.87	-0.88	-0.54	-0.5	-0.8 ± 0.29	-0.45	-0.69	-1.24	-0.8	-0.82	-1.48	-1.09 ± 0.33	-0.74	-0.43	-0.94	-0.55	-0.75	-1.07	-0.83 ± 0.23	-0.95	-1	-0.92	-1.25	-0.9
BcaccTSDC17_02341	0.57	1.08	1.04	1.26	0.75	0.94 ± 0.28	0.68	0.83	0.45	1.29	1.44	0.94 ± 0.41	-1.27	0.52	0.77	0.84	0.52	0.28 ± 0.87	-0.68	0.48	0.74	0.4	0.23	0.23 ± 0.54	1.29	1.04	1.11	0.86	0.79	1.02 ± 0.2	-0.37	0.34	0.01	0.3	1.14	0.85	0.58 ± 0.51	-0.14	0.24	1.01	0.49	-1.63	0.44	0.08 ± 1.17	0.66	0.9	1.03	0.78	0.17
BcaccTSDC17_02342	-	-	-	-	-	-	-	-	-	-	-	-	-	-	-	-	-	-	-	-	-	-	-	-	-0.43	-0.68	-0.45	-0.46	0.31	-0.34 ± 0.38	-0.9	-1.1	-0.92	-0.44	-0.86	-0.75	-0.74 ± 0.21	-0.76	-0.41	-1.02	-0.88	-0.51	-0.88	-0.82 ± 0.22	0.17	-0.79	-0.37	-0.54	-0.92
BcaccTSDC17_02344	1.88	1.87	1.75	1.91	1.43	1.77 ± 0.2	1.87	1.65	1.44	1.47	1.3	1.55 ± 0.22	0.84	2.15	1.93	1.87	2	1.76 ± 0.53	1.84	1.35	1.96	1.82	1.67	1.73 ± 0.23	1.85	1.72	1.53	2.03	1.76	1.78 ± 0.19	0.82	1.18	1.53	1.22	1.39	1.11	1.31 ± 0.19	1.89	1.79	1.62	1.58	1.64	1.29	1.53 ± 0.17	0.67	1.57	1.49	1.73	1.53
BcaccTSDC17_02345	-0.1	-1.6	-1.2	0.2	0.42	-0.46 ± 0.89	-1.07	-0.61	-0.72	-1.05	0.06	-0.68 ± 0.46	-0.6	-1.12	-0.47	-0.53	-0.57	-0.66 ± 0.26	-1.39	-1.12	-1.1	-0.32	-0.63	-0.91 ± 0.43	0.92	-0.43	0.73	-0.59	-0.36	0.05 ± 0.71	-0.45	-1.05	-1.11	-0.45	-0.78	-0.6	-0.73 ± 0.28	-0.46	-0.58	0.65	0.18	-0.73	-0.82	-0.18 ± 0.71	-0.92	-0.63	-0.34	-0.31	-0.61
BcaccTSDC17_02368	-	-	-	-	-	-	-	-	-	-	-	-	-	-	-	-	-	-	-	-	-	-	-	-	0.51	-0.69	0.41	-0.34	0.38	0.06 ± 0.53	-0.14	-0.34	0.1	-1.24	-0.49	1.24	-0.1 ± 1.05	-0.26	-1.27	-0.42	-0.14	0.37	-0.06	-0.06 ± 0.33	-0.82	-0.56	-0.72	-0.39	-0.17
BcaccTSDC17_02399	-0.6	-0.19	-1.46	-1.08	-0.89	-0.84 ± 0.48	0.4	-0.42	-0.75	-0.54	0.82	-0.1 ± 0.67	-1.21	-0.32	-0.47	0.04	0.03	-0.39 ± 0.51	0.02	-0.71	-0.53	-0.55	-0.64	-0.48 ± 0.29	-0.35	-0.92	-0.47	0.41	-0.87	-0.44 ± 0.54	-0.49	-0.36	-0.62	-0.75	-0.61	-0.44	-0.61 ± 0.13	-1.2	-0.91	-0.62	-0.91	-0.23	-0.61	-0.59 ± 0.28	-0.79	-0.8	-0.47	-0.78	-0.75
BcaccTSDC17_02401	-0.77	-0.37	0.02	-1.01	-0.17	-0.46 ± 0.42	0.04	1.4	1.29	0.52	-0.27	0.6 ± 0.74	1.07	0.6	-1.03	-1.98	-0.85	-0.44 ± 1.25	-0.23	0.51	1.16	-0.87	-0.48	0.02 ± 0.81	0.96	1.39	0.98	0.99	0.78	1.02 ± 0.22	1.11	0.94	-1.5	0.95	1.38	1.39	0.55 ± 1.39	1.34	0	-1.39	1.16	0.91	1.13	0.45 ± 1.23	0.99	0.79	1.55	1.17	0.83
BcaccTSDC17_02418	-	-	-	-	-	-	-	-	-	-	-	-	-	-	-	-	-	-	-	-	-	-	-	-	-1.18	-0.65	-1.01	1.14	-0.66	-0.47 ± 0.93	-1.27	-1.13	-0.98	-0.99	-0.6	-1.04	-0.9 ± 0.2	-0.94	-0.81	-0.92	-1.1	-1.05	-0.52	-0.9 ± 0.26	-0.99	-0.55	-0.55	-1.08	0.03
BcaccTSDC17_02420	-1.28	0.44	-1.07	-0.67	-0.8	-0.67 ± 0.66	-0.84	-0.63	-0.85	-0.93	0.8	-0.49 ± 0.73	-0.93	-0.81	-0.99	0.75	-0.53	-0.5 ± 0.72	-0.73	-0.66	-0.89	-1.05	-0.97	-0.86 ± 0.16	-	-	-	-	-	-	-	-	-	-	-	-	-	-	-	-	-	-	-	-	-	-	-	-	-
BcaccTSDC17_02422	-0.42	-0.28	-0.17	-0.29	-0.19	-0.27 ± 0.1	-0.58	-0.57	-0.45	-0.34	-0.78	-0.54 ± 0.17	-0.3	-0.93	-0.71	-1.31	-0.9	-0.83 ± 0.37	-0.72	-0.82	-0.54	-0.39	-0.36	-0.57 ± 0.2	-1.1	-0.29	0.49	-0.96	-1.09	-0.59 ± 0.69	-0.99	-0.63	-0.56	-0.91	-0.53	-1.31	-0.83 ± 0.37	-0.57	-0.94	0.02	-0.82	-0.84	-0.78	-0.61 ± 0.42	-0.85	-0.92	-0.28	-0.66	-0.61
BcaccTSDC17_02427	-1.06	-1.17	0.8	-0.65	-0.79	-0.57 ± 0.8	-0.88	-1.21	-0.8	-0.92	-1.61	-1.09 ± 0.33	-0.61	-0.15	-1.09	-0.67	-1.19	-0.74 ± 0.41	-0.81	-0.88	-1.4	-0.96	-0.8	-0.97 ± 0.25	-	-	-	-	-	-	-	-	-	-	-	-	-	-	-	-	-	-	-	-	-	-	-	-	-
BcaccTSDC17_02447	-0.53	0.31	-0.14	0.59	-1.18	-0.19 ± 0.7	-0.03	-0.59	-0.76	-0.8	-1.26	-0.69 ± 0.45	0.69	-0.33	-0.58	-0.93	-0.78	-0.38 ± 0.64	0.64	-0.82	-0.62	0.24	-0.31	-0.18 ± 0.61	1.03	-1	-1.79	-0.56	0.34	-0.4 ± 1.11	-0.28	-0.76	-1.08	0.35	1.34	1.78	0.6 ± 1.27	-0.24	-0.64	1.33	-0.43	0.5	-1.13	0.07 ± 1.08	-0.8	-0.71	-0.15	-0.52	-0.8
BcaccTSDC17_02449	0.11	0.2	0.07	0.04	0.6	0.21 ± 0.23	-0.15	0.58	0.6	-1.24	-1.2	-0.28 ± 0.91	0.18	0.55	0.48	0.79	-0.74	0.25 ± 0.6	1.39	0.66	-0.18	-0.95	-0.51	0.08 ± 0.94	-0.9	0.49	-1.18	-0.44	-0.97	-0.6 ± 0.67	-0.39	1.77	-0.98	-0.07	1.93	-0.74	0.04 ± 1.32	0.14	-0.73	1.29	-1.14	-0.98	-1.06	-0.47 ± 1.18	-0.33	-0.61	1.56	-0.49	-0.55
BcaccTSDC17_02471	0.44	0.25	-0.17	0.62	-1.74	-0.12 ± 0.95	0.04	0.47	0.22	0.44	0.43	0.32 ± 0.18	-0.58	0.39	-0.65	-0.87	-0.88	-0.52 ± 0.53	-0.17	0.54	-0.97	0.76	1.16	0.26 ± 0.84	0.65	0.65	0.6	0.79	0.15	0.57 ± 0.24	-1.27	-0.24	0.27	0.04	0.23	-0.09	0.11 ± 0.17	0.42	-0.43	-0.02	1.12	0.08	0.19	0.34 ± 0.52	0.27	0.5	0.34	0.16	0.46
BcaccTSDC17_02593	-	-	-	-	-	-	-	-	-	-	-	-	-	-	-	-	-	-	-	-	-	-	-	-	-1.12	-0.68	-0.41	0.23	-0.28	-0.45 ± 0.5	-0.1	-0.84	-0.47	-1.01	-1.05	-0.63	-0.79 ± 0.28	-0.83	-1.25	-1	-0.57	-0.8	-0.88	-0.81 ± 0.18	-1.01	-1.08	-0.99	-0.85	-0.17
BcaccTSDC17_02615	-0.79	-1.66	-1.07	-0.82	-1.38	-1.14 ± 0.37	0.64	-0.85	-0.9	-0.73	-0.72	-0.51 ± 0.65	-0.25	-0.31	-0.82	0.98	0.9	0.1 ± 0.8	-0.82	-0.71	-1.04	0.96	-0.46	-0.42 ± 0.79	-0.53	0.97	-1.82	0.58	-1.37	-0.44 ± 1.21	-0.46	0.03	-1.39	-1.51	1.54	-0.56	-0.48 ± 1.41	2	-0.63	-0.32	-1.29	0.8	0.84	0 ± 1.02	0.86	0.36	-0.88	0.67	-0.73
BcaccTSDC17_02616	-0.71	-0.88	0.32	0.4	0.31	-0.11 ± 0.63	-0.69	-0.66	-1	-1.2	-0.03	-0.72 ± 0.44	-1.01	-0.57	-0.46	-1.3	-1.1	-0.89 ± 0.36	-0.5	-0.91	-0.61	-0.29	-0.82	-0.63 ± 0.25	-0.93	-0.57	-0.97	-0.74	-0.46	-0.73 ± 0.22	0.35	1.26	0.65	0.57	0.31	-0.34	0.3 ± 0.45	0.09	-0.61	0.4	-0.67	-0.84	-0.46	-0.39 ± 0.55	0.56	-0.75	-0.4	-1.07	-0.74
BcaccTSDC17_02619	-	-	-	-	-	-	-	-	-	-	-	-	-	-	-	-	-	-	-	-	-	-	-	-	-0.84	-0.37	-0.85	0.69	-0.43	-0.36 ± 0.63	-0.42	-0.49	-1.11	0.62	-0.77	-1.1	-0.59 ± 0.82	-1.36	-0.48	-1.12	-0.99	-0.43	-0.53	-0.77 ± 0.34	0.69	-0.87	0.74	-0.58	-0.48
BcaccTSDC17_02623	-0.8	-1.34	-1.4	-0.61	-0.33	-0.9 ± 0.46	-0.16	0.12	0.19	0.27	0.13	0.11 ± 0.16	-0.62	-0.35	-0.94	-0.52	-1.04	-0.69 ± 0.29	-0.74	-0.86	-0.03	-0.61	-0.49	-0.55 ± 0.32	-0.77	-0.65	-0.46	-0.57	0.09	-0.47 ± 0.33	0.15	-0.07	0.31	0.23	-0.28	-0.6	-0.08 ± 0.43	-0.25	-0.58	-0.23	-0.81	0.21	-1	-0.46 ± 0.55	0.21	0.43	-1.02	-0.29	0.19
BcaccTSDC17_02630	0.03	-1.51	-1.17	-1.46	-0.52	-0.93 ± 0.67	0.05	0.2	-0.98	-1.04	0.68	-0.22 ± 0.76	-0.57	-0.39	-0.87	-0.65	-0.24	-0.55 ± 0.24	-1	-0.44	-1.03	-0.69	-0.45	-0.72 ± 0.29	-	-	-	-	-	-	-	-	-	-	-	-	-	-	-	-	-	-	-	-	-	-	-	-	-
BcaccTSDC17_02643	1.14	-0.05	-0.09	-1.46	-1.52	-0.39 ± 1.11	0.13	0.78	0.51	0.45	0.3	0.43 ± 0.25	-0.43	-0.85	-0.53	-0.2	-0.79	-0.56 ± 0.27	0.13	-1.05	-0.24	-0.42	0.42	-0.23 ± 0.56	0.35	0.35	0.35	0.54	0.8	0.48 ± 0.2	-0.71	0.39	1.88	0.59	0.12	0.16	0.69 ± 0.82	-0.53	0.45	-1.2	0.65	0.91	-1.17	-0.2 ± 1.14	0.47	-0.19	-0.13	0.3	1.01
BcaccTSDC17_02669	-	-	-	-	-	-	-	-	-	-	-	-	-	-	-	-	-	-	-	-	-	-	-	-	0.96	-0.32	-0.63	-1.1	-0.9	-0.4 ± 0.82	-0.98	-1.52	-1.06	-0.92	-0.9	-1.32	-1.05 ± 0.2	-0.54	-0.83	-0.93	-0.94	-1.12	-1.08	-1.02 ± 0.1	-1.12	-1.42	-0.91	-0.82	-0.78
BcaccTSDC17_02675	-0.51	-0.62	-1.61	0.03	0.09	-0.52 ± 0.68	-0.02	0.25	-1	0.59	0.41	0.05 ± 0.63	0.6	-0.77	-0.29	0.42	-0.97	-0.2 ± 0.7	-0.61	-0.79	-0.33	0.78	-0.07	-0.2 ± 0.61	-	-	-	-	-	-	-	-	-	-	-	-	-	-	-	-	-	-	-	-	-	-	-	-	-
BcaccTSDC17_02676	-0.9	0.49	-1.04	-1.24	-0.31	-0.6 ± 0.7	0.59	-0.98	-0.77	0.94	-0.83	-0.21 ± 0.9	-1.07	-1.01	-0.52	0.77	-0.18	-0.4 ± 0.75	-0.5	-0.63	-0.31	-0.92	-0.46	-0.56 ± 0.23	0.18	0.06	-0.21	0.75	0.46	0.25 ± 0.37	0.94	0.12	-1.51	0.49	-0.4	-0.22	-0.41 ± 0.83	0.9	0.18	0.53	0.11	-0.24	0.42	0.2 ± 0.35	0.27	-1.05	0.2	-1.17	-0.87
BcaccTSDC17_02684	0.07	0.34	0.25	0.37	1.07	0.42 ± 0.38	0.98	1.16	1.18	1.11	0.84	1.05 ± 0.14	1.18	0.98	1.46	1.23	1.55	1.28 ± 0.23	1.39	1.02	0.69	1.41	0.98	1.1 ± 0.3	0.94	1.49	1.45	1.33	1.45	1.33 ± 0.23	1.77	1.95	1.39	1.59	1.5	1.85	1.58 ± 0.2	1.68	1.35	1.91	1.6	1.6	1.53	1.66 ± 0.17	1.63	1.44	1.65	1.57	1.53
BcaccTSDC17_02688	-0.32	-0.25	-0.01	-0.21	0.45	-0.07 ± 0.31	-1.57	0.53	-0.42	0.23	0.08	-0.23 ± 0.82	0.94	-0.49	-1.13	0.02	0.13	-0.11 ± 0.77	0.23	-1.14	-0.25	-0.76	-0.06	-0.39 ± 0.55	0.26	0.47	0.22	-0.48	0.36	0.17 ± 0.38	1.02	0.7	-1.45	-1.9	0.74	0.94	-0.42 ± 1.46	0.46	0.45	-0.18	-1.72	0.59	0.5	-0.2 ± 1.07	0.58	0.19	0.83	0.45	-1.17
BcaccTSDC17_02690	-	-	-	-	-	-	-	-	-	-	-	-	-	-	-	-	-	-	-	-	-	-	-	-	-0.29	-0.82	-0.73	-0.86	-0.87	-0.71 ± 0.24	-0.68	0.05	-1.1	0.45	-1	0.06	-0.4 ± 0.77	-1.06	0.53	-0.51	0.41	-0.62	-0.58	-0.32 ± 0.49	-0.52	-0.45	-0.55	-0.6	0.51
BcaccTSDC17_02692	0.6	0.57	0.69	0.47	0.89	0.65 ± 0.16	1.06	0.77	1.36	1.28	1.16	1.13 ± 0.23	0.93	1.07	1.08	0.96	0.87	0.98 ± 0.09	0.81	1.25	0.81	0.67	0.64	0.84 ± 0.25	0.25	1.35	0.39	0.94	-1.2	0.35 ± 0.97	1.66	1.96	1.19	1.24	1.43	1.74	1.4 ± 0.25	1.71	1.37	1.38	1.56	1.29	1.37	1.4 ± 0.12	1.57	1.09	1.94	1.35	1.33
BcaccTSDC17_02717	-0.78	0.25	-0.01	-0.73	0.33	-0.19 ± 0.54	1.04	0.92	-0.09	1.61	0.69	0.83 ± 0.62	-1.01	-1.2	-0.78	1.37	-1.13	-0.55 ± 1.09	-0.26	-0.67	-0.43	-0.76	-0.82	-0.59 ± 0.23	0.85	1.4	0.7	1.03	0.61	0.92 ± 0.31	1.19	1.7	0.53	1.26	1.64	1.14	1.14 ± 0.46	0.64	0.8	0.25	0.15	0.41	0.9	0.42 ± 0.33	0.78	1.2	1.06	0.82	-0.13
BcaccTSDC17_02719	-0.56	-0.09	-1.19	-1.18	0.95	-0.41 ± 0.89	-0.1	0.28	0.86	-1.07	0.25	0.04 ± 0.71	-1.04	-0.4	-0.7	-0.44	-0.71	-0.66 ± 0.26	-0.32	0.29	-0.43	-0.64	-0.46	-0.31 ± 0.35	-0.75	-0.98	-0.68	0.96	0.44	-0.2 ± 0.85	-0.44	-0.64	-0.51	0.21	-0.78	-0.25	-0.33 ± 0.43	0.06	-0.58	-0.32	-0.97	-0.86	-0.96	-0.78 ± 0.31	0.59	-0.72	-0.84	-0.74	-1.1
BcaccTSDC17_02721	1.35	0.82	0.96	0.97	0.49	0.92 ± 0.31	0.73	0.45	0.61	0.16	0.53	0.5 ± 0.22	0.86	0.95	0.41	0.78	-0.07	0.59 ± 0.42	-0.24	0.42	0.57	-0.7	0.03	0.02 ± 0.51	1.63	1.16	1.21	1.23	1	1.25 ± 0.23	-0.8	-0.46	0.77	1.36	-0.92	0.37	0.4 ± 0.97	1.38	1.09	1.46	0.72	0.52	1.15	0.96 ± 0.42	1.1	1.33	1.11	1.18	0.9
BcaccTSDC17_02722	2.18	1.99	1.79	2.13	1.77	1.97 ± 0.19	2.19	1.9	1.98	2.08	2.21	2.07 ± 0.13	1.76	1.56	1.93	2.28	1.87	1.88 ± 0.27	1.68	1.84	2.13	1.72	1.8	1.83 ± 0.18	2.19	2.16	2.35	2.14	2.01	2.17 ± 0.12	1.79	1.35	2.43	2.53	2.44	2.26	2.42 ± 0.11	2.37	2.39	2.56	2.36	2.41	2.4	2.43 ± 0.09	2.2	2.17	2.07	2.18	2.46
BcaccTSDC17_02723	0.88	0.44	0.52	0.37	0.35	0.51 ± 0.22	0.82	0.81	0.57	0.42	0.71	0.67 ± 0.17	0.03	0.46	0.51	0.69	-0.5	0.24 ± 0.48	0.38	0.82	-0.43	-0.61	-0.66	-0.1 ± 0.66	1.61	0.74	1.22	0.21	1.44	1.04 ± 0.57	0.48	-0.64	1.37	1.36	1.1	1.53	1.34 ± 0.18	0.78	1.32	1.79	0.81	0.79	1.49	1.22 ± 0.5	1.11	0.9	0.26	0.54	0.46
BcaccTSDC17_02724	2.27	2.49	2.63	2.35	2.46	2.44 ± 0.14	2.77	2.8	2.74	2.58	2.76	2.73 ± 0.09	2.16	2.32	2.79	2.73	2.73	2.55 ± 0.29	2.25	2.55	2.12	2.55	2.5	2.4 ± 0.2	2.61	2.8	2.73	2.03	2.44	2.52 ± 0.3	2.38	2.39	2.64	2.92	2.3	2.3	2.54 ± 0.3	2.77	2.51	2.88	2.33	2.56	2.65	2.6 ± 0.23	2.79	2.54	2.67	2.64	2.74
BcaccTSDC17_02732	2.12	2.05	1.82	2.09	2.13	2.04 ± 0.13	2.09	2.24	2.46	2.17	2.13	2.22 ± 0.15	2.6	2.3	2.48	2.34	2.43	2.43 ± 0.12	2.85	2.53	2.5	2.46	2.63	2.59 ± 0.16	2.24	2.26	2.26	1.78	2.14	2.14 ± 0.2	2.38	2.3	2.36	2.46	2.22	2.29	2.33 ± 0.11	2.69	2.21	2.4	2.42	2.39	2.41	2.41 ± 0.01	2.48	2.56	2.45	2.44	2.51
BcaccTSDC17_02734	-0.86	0.46	-1.13	0.35	-0.71	-0.38 ± 0.73	-1.16	-1.04	-0.87	-0.72	-1.15	-0.99 ± 0.19	-0.8	-0.75	-0.48	0.54	-0.94	-0.48 ± 0.59	-0.62	-0.51	-0.87	-0.77	-1.05	-0.77 ± 0.21	-1.33	-1.04	-0.66	-0.87	0.09	-0.76 ± 0.53	-0.81	-0.54	0.17	-1.13	-0.8	-0.93	-0.67 ± 0.58	-0.76	-0.54	-0.85	-0.69	-1.07	-1.21	-0.96 ± 0.23	-0.49	-0.87	-0.8	-1.23	-0.83
BcaccTSDC17_02735	-0.93	0.43	0.08	0.42	0.1	0.02 ± 0.56	0.8	-0.81	1.14	0.69	0.91	0.55 ± 0.78	-0.77	0.12	-1.39	0.36	-0.99	-0.53 ± 0.75	0.89	-1.25	-0.61	1.43	1.24	0.34 ± 1.2	-1.34	-1.19	0.42	-0.01	1.05	-0.21 ± 1.03	0.87	1.08	1.18	0.94	1.1	-0.12	0.78 ± 0.6	-0.61	1.01	1.09	1.26	1.16	1.05	1.14 ± 0.09	0.51	0.9	1.17	1.1	1.4
BcaccTSDC17_02761	-	-	-	-	-	-	-	-	-	-	-	-	-	-	-	-	-	-	-	-	-	-	-	-	-0.57	-0.82	-0.67	-0.87	0.14	-0.56 ± 0.41	-0.78	-0.86	0.04	-1.04	-0.15	-0.61	-0.44 ± 0.49	-0.69	-1	-1.11	0.17	-0.89	-0.75	-0.64 ± 0.56	-0.76	-0.84	-1.13	-1.18	-0.63
BcaccTSDC17_02766	-	-	-	-	-	-	-	-	-	-	-	-	-	-	-	-	-	-	-	-	-	-	-	-	-0.41	-0.34	0.35	1.09	-1.17	-0.1 ± 0.85	-0.91	-0.48	-0.92	-0.43	-0.5	-0.64	-0.62 ± 0.22	-0.57	-0.81	-0.42	0.39	-0.61	-0.38	-0.25 ± 0.44	-0.76	-0.61	-0.2	-0.79	-1.18
BcaccTSDC17_02781	-	-	-	-	-	-	-	-	-	-	-	-	-	-	-	-	-	-	-	-	-	-	-	-	-0.69	-0.54	-1	-0.06	1.23	-0.21 ± 0.87	-0.49	-0.52	-1.2	0	-0.22	-0.75	-0.54 ± 0.54	-0.5	0.44	-0.24	-0.54	-0.47	0.18	-0.27 ± 0.33	-0.85	-0.13	-0.51	-0.81	-0.61
BcaccTSDC17_02789	-0.41	-0.1	0.59	-0.24	-0.3	-0.09 ± 0.4	-1.32	-1.01	-0.78	0.34	0.02	-0.55 ± 0.7	-0.56	-1.18	-0.25	-0.64	-0.65	-0.66 ± 0.34	-0.6	0.16	-0.43	-0.74	-0.34	-0.39 ± 0.35	0.75	-0.83	0.46	-0.93	-0.58	-0.23 ± 0.78	-0.45	-0.3	0.31	-0.66	-0.65	0.46	-0.14 ± 0.6	-1.47	0.61	-0.22	-1.02	-0.91	0.53	-0.4 ± 0.72	-0.73	0.56	0.54	0.5	-0.61
BcaccTSDC17_02808	-1.16	-0.06	-0.96	-0.85	-0.8	-0.77 ± 0.42	-0.62	-0.88	-1.01	-0.99	-0.68	-0.84 ± 0.18	-1.09	-1.2	-1.34	-0.79	-0.95	-1.07 ± 0.21	-1.51	-0.63	-1.17	-0.88	-1.09	-1.05 ± 0.33	-	-	-	-	-	-	-	-	-	-	-	-	-	-	-	-	-	-	-	-	-	-	-	-	-
BcaccTSDC17_02820	0.54	0.1	-0.9	-0.07	0.25	-0.02 ± 0.54	0.06	0.23	0.5	0.14	0.18	0.22 ± 0.17	0.37	0.15	-1.19	0.5	0.49	0.06 ± 0.71	0.47	-0.25	0.38	0.06	0.78	0.29 ± 0.4	0.39	0.63	0.26	0.56	0.22	0.41 ± 0.18	-0.11	-0.34	-0.63	0.16	0.49	0.85	0.22 ± 0.63	0.27	0.18	0.24	0.2	-0.97	0.21	-0.08 ± 0.59	-0.26	-0.06	0.34	0.54	-0.72
BcaccTSDC17_02827	0.68	0.78	0.29	0.92	0.42	0.62 ± 0.26	1.21	1.47	1.6	1.25	1.31	1.37 ± 0.16	1	0.75	0.39	0.23	0.27	0.53 ± 0.33	-0.48	-1.42	-0.93	-0.98	-0.94	-0.95 ± 0.33	0.86	0.95	0.81	-1.06	0.6	0.43 ± 0.85	1.25	1.38	1.7	1.35	1.7	1.74	1.63 ± 0.18	1.02	0.48	1.1	0.86	0.54	0.71	0.8 ± 0.23	0.39	0.6	-1.44	0.26	-0.32
BcaccTSDC17_02828	1.01	0.69	0.57	0.78	0.27	0.66 ± 0.27	1.45	1.51	1.59	1.28	1.23	1.41 ± 0.15	1.21	0.53	-1.53	0.54	-1.15	-0.08 ± 1.19	0.54	-1.35	0.65	-0.52	0.43	-0.05 ± 0.87	0.66	0.57	0.93	0.84	0.61	0.72 ± 0.16	1.63	1.51	1.36	1.52	1.5	1.58	1.49 ± 0.09	0.32	0.66	0.69	0.42	0.82	0.52	0.61 ± 0.18	0.12	0.67	0.13	0.14	0.28
BcaccTSDC17_02829	-0.82	-0.65	-0.66	-1.1	-1.54	-0.95 ± 0.37	0.51	-0.27	0.17	0.22	0.14	0.15 ± 0.28	-0.35	0.44	-0.48	-0.6	-0.68	-0.33 ± 0.45	-0.27	-0.57	-0.17	-0.69	-0.81	-0.5 ± 0.27	-0.29	0.54	-1.82	-0.93	0.36	-0.43 ± 0.97	0.45	1.12	1.01	0.71	1.51	0.71	0.98 ± 0.38	-0.11	0.47	0.2	-1.3	-1.32	-1.23	-0.91 ± 0.74	-1.29	-0.52	-0.19	-0.98	-1.02
BcaccTSDC17_02852	-0.33	-0.1	-1.55	-0.21	-1.2	-0.68 ± 0.65	-1.37	0.08	-0.57	0.19	0.29	-0.28 ± 0.7	-1.15	-0.48	0.48	-1.01	-0.43	-0.52 ± 0.64	-0.5	0.2	-0.55	-0.16	-0.55	-0.31 ± 0.33	-0.95	-0.6	-0.22	-0.91	-0.48	-0.63 ± 0.3	-0.83	-0.65	-0.74	-0.68	-0.96	-1.09	-0.87 ± 0.19	-0.8	-0.87	-0.86	-0.83	-0.24	-1.28	-0.8 ± 0.43	-0.66	-0.54	-0.91	-0.49	-0.64
BcaccTSDC17_02902	-	-	-	-	-	-	-	-	-	-	-	-	-	-	-	-	-	-	-	-	-	-	-	-	0.65	1.6	1.81	1.1	0.8	1.19 ± 0.5	1.9	-0.91	0.95	-1.31	-0.92	1.14	-0.03 ± 1.26	-0.22	1.15	-1.27	1.31	1.39	1.01	0.61 ± 1.27	0.74	-1.11	1.11	0.82	1.46
BcaccTSDC17_02905	-	-	-	-	-	-	-	-	-	-	-	-	-	-	-	-	-	-	-	-	-	-	-	-	-0.94	-1.09	-1.34	-1.28	-0.17	-0.96 ± 0.47	-0.79	-0.68	0.41	-0.63	-0.96	-0.91	-0.52 ± 0.64	-1.09	-1.03	-1.37	-0.56	-0.42	-1.04	-0.85 ± 0.44	-1.17	-0.81	-0.7	-0.63	-0.53
BcaccTSDC17_02910	-	-	-	-	-	-	-	-	-	-	-	-	-	-	-	-	-	-	-	-	-	-	-	-	0.06	-0.57	-0.91	-0.81	-0.58	-0.56 ± 0.38	-1.02	-0.67	0.27	-0.99	-0.69	-0.56	-0.49 ± 0.54	-1.07	0.78	-0.37	-0.99	-0.64	-1.15	-0.79 ± 0.35	-0.76	-1.4	-0.59	-0.37	-0.75
BcaccTSDC17_02911	-1	-1.43	-1.35	0.78	1.48	-0.3 ± 1.34	1.79	1.7	1.61	1.18	1.71	1.6 ± 0.24	2.16	1.93	2.05	1.83	2.13	2.02 ± 0.14	2.26	1.56	1.84	1.7	2.15	1.9 ± 0.3	0.71	1.7	1.86	0.77	1.87	1.38 ± 0.59	2.26	-0.78	2.08	1.62	1.69	2.38	1.94 ± 0.35	1.58	2.04	1.74	2.32	2.64	1.93	2.16 ± 0.4	1.89	2.12	2.41	2.26	2.31
BcaccTSDC17_02927	-0.31	-0.32	-1.13	-0.2	-1.03	-0.6 ± 0.45	-0.22	-0.65	-0.88	-0.6	-0.68	-0.61 ± 0.24	-0.83	-0.42	-0.55	-0.91	-0.74	-0.69 ± 0.2	-0.59	-0.2	0.45	0.47	0.55	0.14 ± 0.51	1.05	-0.19	-0.55	-0.56	-0.49	-0.15 ± 0.69	-0.18	-0.2	-1.08	-1.02	-0.08	-1.02	-0.8 ± 0.48	0.04	-0.79	1.52	-0.86	-0.3	-0.89	-0.13 ± 1.13	0.04	-1.05	0.84	-0.79	-0.99
BcaccTSDC17_02929	-	-	-	-	-	-	-	-	-	-	-	-	-	-	-	-	-	-	-	-	-	-	-	-	1.35	1.68	1.18	1.29	1.35	1.37 ± 0.19	1.52	1.53	-1.58	1.31	1.46	1.8	0.75 ± 1.56	1.5	0.93	1.46	1.14	1.13	1.26	1.25 ± 0.15	1.43	0.66	1.38	1.35	0.64
BcaccTSDC17_02942	-	-	-	-	-	-	-	-	-	-	-	-	-	-	-	-	-	-	-	-	-	-	-	-	-0.65	-0.75	-0.96	-1.18	0.12	-0.68 ± 0.49	-0.92	-0.87	0.42	-0.59	-0.28	-0.16	-0.15 ± 0.42	-0.5	0.56	0.17	0.25	-0.05	0.2	0.15 ± 0.13	0.67	0.19	-0.19	-0.97	-0.86
BcaccTSDC17_02965	-	-	-	-	-	-	-	-	-	-	-	-	-	-	-	-	-	-	-	-	-	-	-	-	-0.45	-0.64	-0.63	-1.07	-1.4	-0.84 ± 0.39	-0.51	-0.98	0.18	-0.84	-0.52	-1.06	-0.56 ± 0.54	-0.68	-0.39	-0.02	0.26	-0.53	-0.93	-0.31 ± 0.53	-0.03	-1.1	-0.23	0.05	-1.08
BcaccTSDC17_02966	-	-	-	-	-	-	-	-	-	-	-	-	-	-	-	-	-	-	-	-	-	-	-	-	-0.78	-0.75	-0.8	-0.73	-0.75	-0.76 ± 0.03	-0.98	-1.06	-0.88	-0.93	-1.4	-1.09	-1.07 ± 0.23	-0.73	-0.56	-0.89	-0.91	-0.66	-0.84	-0.83 ± 0.11	-0.81	-0.99	-0.7	-0.77	-0.19
BcaccTSDC17_02967	-0.24	-0.26	0.11	-0.21	-0.23	-0.17 ± 0.15	-0.47	-0.55	-0.63	1.08	-0.56	-0.23 ± 0.73	-1.06	-0.5	-0.21	-1.13	-0.15	-0.61 ± 0.46	-0.27	-0.58	-0.4	0.55	-0.83	-0.31 ± 0.52	-0.52	-0.49	0.18	-0.64	-0.14	-0.32 ± 0.34	0.78	0.07	-1.1	-0.96	-0.51	-0.39	-0.74 ± 0.34	-0.13	0.56	-1.17	0.25	0.21	0.07	-0.16 ± 0.68	-1	-0.43	1.22	0.11	0.69
BcaccTSDC17_02968	0.52	0.44	0.61	0.14	-0.16	0.31 ± 0.32	-2.23	1.17	-1.29	-0.95	-1	-0.86 ± 1.25	0.94	0.46	0.72	-0.62	1.11	0.52 ± 0.68	-0.41	-0.73	-0.14	-1	-0.26	-0.51 ± 0.35	0.98	0.68	0.81	-0.08	-1.2	0.24 ± 0.9	0.87	0.54	-0.2	0.4	0.28	0.21	0.17 ± 0.26	1.16	0.54	0.65	-1.17	-1.46	0.44	-0.38 ± 1.08	0.51	0.35	0.53	0.17	-1.06
BcaccTSDC17_02970	-0.51	0.11	-0.96	-0.26	0.09	-0.31 ± 0.45	0.29	-0.94	-0.85	-0.81	-0.89	-0.64 ± 0.52	-0.95	-0.4	-0.85	-0.82	-0.83	-0.77 ± 0.21	-0.72	-1.17	-0.81	-0.82	-1.1	-0.93 ± 0.2	-0.58	-1.08	-0.83	-0.71	-0.8	-0.8 ± 0.18	-0.16	-1.01	-0.7	-0.58	-0.56	-0.76	-0.65 ± 0.1	-0.89	-0.79	-0.53	-0.7	-1.19	-0.34	-0.69 ± 0.36	0.62	-0.48	-0.32	-0.54	-0.98
BcaccTSDC17_02971	-0.8	0.39	-0.96	0.81	-0.13	-0.14 ± 0.76	-0.71	-1.03	-0.59	-0.86	-0.78	-0.79 ± 0.17	-0.76	-0.71	-0.4	-0.75	-0.56	-0.64 ± 0.15	-0.64	-0.31	-0.88	-0.9	-0.64	-0.67 ± 0.24	-0.69	-1.21	-0.58	-0.53	0.38	-0.53 ± 0.57	-0.25	0.9	0.27	0.75	-0.74	-0.44	-0.04 ± 0.67	-0.55	-0.49	-0.43	-0.98	-0.81	-0.32	-0.64 ± 0.31	-0.93	0.81	-0.36	-1.1	0.08
BcaccTSDC17_02973	-0.4	-1.27	-1.06	-0.01	0.42	-0.47 ± 0.71	-1.18	-0.48	-1.11	-0.8	-1.04	-0.92 ± 0.28	-0.47	-0.89	-0.65	-0.93	-0.4	-0.67 ± 0.24	-0.94	-0.81	-0.84	-0.56	-0.67	-0.76 ± 0.15	-0.93	-0.63	-0.42	-1.13	-0.84	-0.79 ± 0.27	-0.68	-0.91	-0.71	-0.44	-0.61	-0.39	-0.54 ± 0.15	-0.95	-1	-0.63	0.54	-0.38	-0.66	-0.28 ± 0.56	-0.12	-0.87	-1.35	-1.15	-0.95
BcaccTSDC17_02974	-0.51	0.54	-0.07	0.14	0.59	0.14 ± 0.45	-0.42	-0.87	0.18	-0.89	-1.15	-0.63 ± 0.52	-0.37	0.26	1.44	-1.11	-0.4	-0.04 ± 0.96	-0.36	-0.72	0.65	-1.01	-0.23	-0.33 ± 0.63	0.62	0.4	0.46	0.46	0.39	0.47 ± 0.09	1	0.49	-0.07	0.08	0.76	-0.2	0.14 ± 0.43	-0.44	-1.12	0.49	-1.14	-0.82	-1.11	-0.64 ± 0.77	0.8	0.01	0.6	-1.3	-0.97
BcaccTSDC17_02976	-0.75	0.07	-0.09	0.12	1.17	0.1 ± 0.69	0.15	0.7	-0.68	0.79	-0.89	0.01 ± 0.77	-0.29	-0.6	-0.8	-1.21	-0.86	-0.75 ± 0.34	-0.34	-0.72	-0.96	-0.54	-0.6	-0.63 ± 0.23	-0.33	-0.68	0.07	-0.66	0.81	-0.16 ± 0.62	1.37	0.86	-0.09	-0.52	0.24	-0.56	-0.23 ± 0.38	0.03	-1.04	-1.12	0.09	0.54	0.35	-0.04 ± 0.75	-1.36	-0.37	-0.53	-0.92	0.33
BcaccTSDC17_02977	-1.33	-1.08	0.09	-0.82	-1.27	-0.88 ± 0.58	-0.67	0.2	-0.83	-1.23	-1	-0.7 ± 0.54	-0.88	-0.93	-0.58	-0.77	-1.09	-0.85 ± 0.19	-1.08	0.04	-0.24	-1.12	-0.53	-0.59 ± 0.51	-0.51	-0.97	-0.99	-0.85	0.4	-0.58 ± 0.58	0.15	0.02	-0.89	0.8	-0.14	-0.39	-0.15 ± 0.71	-1.01	-0.78	-0.51	-0.86	-0.93	-0.3	-0.65 ± 0.3	0.68	-0.41	-0.95	-0.94	-0.51
BcaccTSDC17_02996	0.83	0.83	0.49	0.8	0.26	0.64 ± 0.26	0.55	0.22	0.06	0.23	0.45	0.3 ± 0.2	0.47	0.64	0.53	0.35	0.22	0.44 ± 0.16	0.13	-0.46	0.13	0.42	0.24	0.09 ± 0.33	1.02	-0.26	0.7	0.49	0.08	0.41 ± 0.51	-0.46	-0.77	0.5	0.07	-0.23	1	0.34 ± 0.53	-0.82	0.13	0.73	0.15	0.36	-0.58	0.17 ± 0.55	0.1	0.48	0.01	0.38	0.19
BcaccTSDC17_03001	-	-	-	-	-	-	-	-	-	-	-	-	-	-	-	-	-	-	-	-	-	-	-	-	-1.28	-0.6	-0.79	-0.88	-1.05	-0.92 ± 0.26	-0.58	-0.79	-1.1	-0.78	-0.88	-0.5	-0.82 ± 0.25	-0.3	-0.91	-0.62	-0.55	-0.52	-0.33	-0.5 ± 0.12	-0.72	-0.98	-0.47	-0.15	-0.88
BcaccTSDC17_03002	-0.66	0.36	-1.12	-1.03	0.49	-0.39 ± 0.77	-1.07	-1.11	-1.28	-0.52	0.33	-0.73 ± 0.66	-1.05	0.03	-0.54	-0.82	-0.48	-0.57 ± 0.41	-1.2	-0.11	-0.74	0.05	-0.78	-0.56 ± 0.52	-0.75	-0.89	-0.81	-1.04	0.75	-0.55 ± 0.73	-0.29	-0.27	-0.14	-0.81	-1.04	-0.83	-0.7 ± 0.39	-0.39	-0.51	-0.83	-0.1	-0.95	-0.76	-0.66 ± 0.38	-0.16	-1.15	-0.82	-0.85	-0.81
BcaccTSDC17_03007	-0.53	-0.8	-1.05	-0.59	-0.74	-0.74 ± 0.2	-0.94	-1.29	-0.73	-0.63	-1.04	-0.93 ± 0.26	-0.71	-1.13	-0.72	-0.51	-1.28	-0.87 ± 0.32	-1.06	-1.26	-0.85	-0.8	-0.53	-0.9 ± 0.27	-0.81	-0.21	-1.04	-0.57	-0.8	-0.69 ± 0.31	-0.79	-0.5	-0.73	-0.73	-0.9	-0.16	-0.63 ± 0.32	-0.9	-0.07	-0.82	-0.47	-1.41	-0.41	-0.78 ± 0.46	-1.03	-0.98	-0.88	-1.19	-0.9
BcaccTSDC17_03011	-0.41	-1.88	-0.58	-1.11	-1	-1 ± 0.57	0.12	-0.86	-0.95	0.05	-1.47	-0.62 ± 0.69	-0.83	-0.57	-0.86	-0.31	-0.83	-0.68 ± 0.24	-1.14	0.73	-0.75	-0.96	-0.92	-0.61 ± 0.76	0.1	-0.53	-0.97	-1.1	0.08	-0.48 ± 0.57	-0.88	-1.19	0.02	-0.98	-0.77	-1.17	-0.73 ± 0.52	-0.65	-0.08	-1.15	-0.79	-0.74	-0.15	-0.7 ± 0.42	-0.52	-0.99	-0.71	-0.72	-0.74
BcaccTSDC17_03091	-0.87	-0.41	-1.35	-1.02	-0.83	-0.9 ± 0.34	-1.46	0.76	-0.76	-0.62	-0.79	-0.57 ± 0.81	0.9	1.7	0.2	-0.8	-0.67	0.27 ± 1.06	-0.77	-1.05	-0.72	-0.62	-0.33	-0.7 ± 0.26	-	-	-	-	-	-	-	-	-	-	-	-	-	-	-	-	-	-	-	-	-	-	-	-	-
BcaccTSDC17_03126	-	-	-	-	-	-	-	-	-	-	-	-	-	-	-	-	-	-	-	-	-	-	-	-	-0.09	0.08	-0.01	-0.07	-0.11	-0.04 ± 0.08	1.06	-0.11	-0.07	-0.04	0.65	1.03	0.39 ± 0.54	1.28	0.32	0.13	0.14	0.62	0.44	0.33 ± 0.24	0.39	-0.08	0.61	0.56	-0.44
BcaccTSDC17_03128	-1.5	-0.45	-1.55	-0.31	0.31	-0.7 ± 0.81	0.19	0.61	0.32	-0.19	0.83	0.35 ± 0.39	1.25	0.81	0.95	0.31	1.05	0.88 ± 0.35	1.41	0.08	0.97	0.34	0.89	0.74 ± 0.53	0.27	1.06	0.79	0.54	0.75	0.68 ± 0.29	-0.72	1.58	0.37	0.81	1.12	1.15	0.86 ± 0.36	0.79	-0.95	0.97	0.73	0.82	0.85	0.84 ± 0.1	1.04	0.54	1.24	1.14	1.31
BcaccTSDC17_03133	-0.24	-1.02	0.26	-1.06	0.39	-0.33 ± 0.68	0.22	0.59	-0.87	-0.14	-0.46	-0.13 ± 0.57	-0.72	-0.72	-0.55	-0.66	-0.51	-0.63 ± 0.1	-0.72	-0.54	-0.37	-0.63	-0.58	-0.57 ± 0.13	0.28	-1.11	-1.19	-0.72	-0.04	-0.56 ± 0.65	0.04	1.51	-0.98	-0.41	0.12	-0.44	-0.43 ± 0.45	0.02	0.78	0.45	-0.94	0.04	0.11	-0.08 ± 0.6	-0.11	-0.38	-0.97	0.22	0.96
BcaccTSDC17_03134	-	-	-	-	-	-	-	-	-	-	-	-	-	-	-	-	-	-	-	-	-	-	-	-	-1.06	-1.17	-0.93	-0.57	-0.09	-0.77 ± 0.44	-0.53	-0.66	-0.94	-1.02	-0.75	-1.29	-1 ± 0.22	-0.42	-1.36	-0.63	-0.55	-0.97	-0.91	-0.76 ± 0.21	-1.04	-1.16	-0.36	-0.67	0
BcaccTSDC17_03152	1.5	1.06	1.78	1.93	1.58	1.57 ± 0.33	1.2	1.37	1.5	1.28	1.22	1.31 ± 0.12	1.11	1.3	1.23	1.48	1.08	1.24 ± 0.16	1.36	0.63	1.62	1.44	1.19	1.25 ± 0.38	1.68	1.65	1.76	1.48	1.82	1.68 ± 0.13	1.73	1.87	1.59	1.35	1.32	1.29	1.39 ± 0.14	1.98	1.78	1.52	1.85	1.69	1.79	1.71 ± 0.15	1.79	1.76	1.65	1.7	2.01
BcaccTSDC17_03155	-0.92	-0.03	0.85	0.36	0.08	0.06 ± 0.65	0.28	-0.7	-0.05	0.53	0.34	0.08 ± 0.48	-0.61	-1.19	0.13	0.56	-0.7	-0.36 ± 0.7	-0.16	-0.96	1.01	0.93	1.22	0.41 ± 0.94	0.56	-1.44	0.18	1.13	0.01	0.09 ± 0.96	-0.26	-0.42	0.37	-0.61	-0.54	-0.38	-0.29 ± 0.45	0.94	0.08	-1.08	-0.08	0.18	-0.02	-0.25 ± 0.56	-0.03	0.96	0.17	-1.55	0.6
BcaccTSDC17_03173	-1.01	-0.82	-1.06	-0.14	-0.73	-0.75 ± 0.37	-0.61	-1.37	-0.38	-0.94	-0.8	-0.82 ± 0.37	-0.62	-1.31	-0.35	-1.23	-0.68	-0.84 ± 0.41	-0.64	-0.52	-0.94	-0.54	-0.92	-0.71 ± 0.21	-0.77	-0.3	-0.52	-0.99	-0.95	-0.71 ± 0.29	-1.03	-0.63	-1.18	0.27	-1.05	-0.94	-0.73 ± 0.67	-0.87	-0.74	-0.91	-1.12	-0.51	-0.39	-0.73 ± 0.34	-0.78	-0.77	-0.14	-0.32	-0.75
BcaccTSDC17_03188	0.67	1.21	1.64	0.47	1.45	1.09 ± 0.5	0.67	1.36	1.32	1.15	1.07	1.11 ± 0.28	0.79	0.36	1.32	0.83	1.24	0.91 ± 0.39	0.33	0.85	1	1.83	0.77	0.96 ± 0.55	1.21	1.17	1.37	1.19	1.37	1.26 ± 0.1	1.55	0.67	1.39	1.05	0.85	0.53	0.96 ± 0.36	1.06	1.95	1.04	1.22	1.34	0.62	1.06 ± 0.32	1.11	1.26	1.21	1.49	1.35
BcaccTSDC17_03198	-0.82	0.71	-0.92	0.75	-1.01	-0.26 ± 0.9	0.37	-1.05	-0.67	-1.03	0.17	-0.44 ± 0.67	-0.89	-0.64	-0.51	-0.86	-0.81	-0.74 ± 0.16	-0.67	-0.58	-0.41	-0.69	-1.31	-0.73 ± 0.34	-	-	-	-	-	-	-	-	-	-	-	-	-	-	-	-	-	-	-	-	-	-	-	-	-
BcaccTSDC17_03199	-	-	-	-	-	-	-	-	-	-	-	-	-	-	-	-	-	-	-	-	-	-	-	-	1.35	2.02	2.07	2.03	2.11	1.91 ± 0.32	2.09	1.18	1.28	1.66	0.96	1.42	1.33 ± 0.29	-1.19	1.58	1.81	1.51	1.62	2.25	1.8 ± 0.32	1.63	1.16	1.07	1.08	0.92
BcaccTSDC17_03203	0.54	0.23	-0.12	0.31	-1.27	-0.06 ± 0.71	0.1	-0.52	-0.67	-1	-1.93	-0.8 ± 0.74	-0.37	0.34	0.47	-0.05	0.83	0.24 ± 0.47	0.1	0.18	1.16	-0.6	0.43	0.25 ± 0.64	-0.86	-1.07	-0.99	-0.85	0.59	-0.63 ± 0.69	-0.43	-0.21	-1.12	0.74	-0.61	-0.51	-0.38 ± 0.79	-0.14	1.62	-0.56	0.83	-0.61	1.18	0.21 ± 0.93	0.21	0.01	-0.8	0.19	0.48
BcaccTSDC17_03205	2.24	-0.22	-1.02	-1	-1.05	-0.21 ± 1.41	0.15	-1.21	-0.62	0.56	-0.76	-0.38 ± 0.72	-0.19	-0.84	-0.66	0.52	-0.48	-0.33 ± 0.53	-0.12	0.75	-0.77	0.92	-0.36	0.08 ± 0.72	-	-	-	-	-	-	-	-	-	-	-	-	-	-	-	-	-	-	-	-	-	-	-	-	-
BcaccTSDC17_03214	-0.44	-0.17	-0.96	-1.3	0.27	-0.52 ± 0.62	0.12	-0.86	-1.15	-0.55	0.91	-0.31 ± 0.83	-0.1	-0.38	-0.94	0.7	-0.58	-0.26 ± 0.62	-1.13	0.76	-0.51	-0.65	-0.4	-0.38 ± 0.7	2.16	0.94	1.8	-0.58	-0.81	0.7 ± 1.35	-0.92	0.14	1.84	-0.23	0.98	-0.47	0.53 ± 1.08	0.03	-0.67	-1.06	-1.56	-1.31	-0.83	-1.19 ± 0.32	-0.13	2.19	0.34	-1.43	-0.9
BcaccTSDC17_03226	-0.73	-0.68	0.18	-0.69	0.21	-0.34 ± 0.49	-1.28	-0.67	0.77	-0.78	0.05	-0.38 ± 0.8	-0.56	-0.65	-0.71	0.2	0.61	-0.22 ± 0.59	-0.23	0.35	-0.15	0.92	0.94	0.37 ± 0.56	1.03	0.63	0.58	-0.34	0.32	0.44 ± 0.51	-0.38	-0.73	1.14	0.53	0	0.37	0.51 ± 0.47	-0.24	-0.95	-1.05	0.12	-0.52	-0.65	-0.53 ± 0.49	-1.06	-0.79	-1.53	-0.56	0.67
BcaccTSDC17_03228	-1.58	0.69	1.08	0.95	-1.31	-0.03 ± 1.3	1.21	0.9	1.18	1.12	0.78	1.04 ± 0.19	1.13	1.34	1.01	1.31	0.89	1.13 ± 0.19	1.1	1.46	1.58	1.63	1.2	1.39 ± 0.23	1.85	1.91	1.92	1.88	1.83	1.88 ± 0.04	1.66	2.03	1.73	1.41	1.87	1.69	1.67 ± 0.19	1.28	1.62	1.95	1.69	2.05	1.73	1.86 ± 0.17	2.26	1.87	1.95	1.91	1.61
BcaccTSDC17_03253	-0.92	-0.09	-0.55	-0.75	-0.33	-0.53 ± 0.33	0.03	-0.83	-0.52	-1.03	-0.64	-0.6 ± 0.4	-0.54	-0.9	-0.67	0.03	-0.83	-0.58 ± 0.37	-0.85	-1.13	-0.66	-0.76	-1.07	-0.89 ± 0.2	-	-	-	-	-	-	-	-	-	-	-	-	-	-	-	-	-	-	-	-	-	-	-	-	-
BcaccTSDC17_03264	-	-	-	-	-	-	-	-	-	-	-	-	-	-	-	-	-	-	-	-	-	-	-	-	-0.68	0.59	0.42	-0.96	-0.39	-0.21 ± 0.68	0.04	0.15	-0.96	-0.11	-0.42	0.55	-0.24 ± 0.63	-0.36	-0.26	-0.78	-0.64	-1.07	-0.22	-0.68 ± 0.35	-0.73	-0.61	-0.02	0.97	-0.9
BcaccTSDC17_03276	1.45	-1.8	1.18	-0.11	-0.92	-0.04 ± 1.38	-1.36	0.77	-0.92	-0.96	-0.67	-0.63 ± 0.82	-0.14	-0.82	-0.49	-1.11	0.18	-0.47 ± 0.51	-0.65	-0.22	-0.82	-0.74	-0.29	-0.55 ± 0.27	-0.15	-1.45	-0.41	-0.99	0.02	-0.6 ± 0.61	-0.5	-0.76	-0.05	0.16	-0.13	-0.33	-0.08 ± 0.2	-0.48	1.04	-0.58	-0.67	-0.24	-0.92	-0.6 ± 0.28	0.3	0.48	-0.61	-0.29	1.6
BcaccTSDC17_03277	-0.88	-0.37	0.51	0.09	0.45	-0.04 ± 0.59	-0.3	-0.87	-1.18	-0.71	-0.94	-0.8 ± 0.33	-0.87	-0.44	-0.44	-0.54	-0.55	-0.57 ± 0.18	-0.68	-0.56	-0.86	-0.64	-0.97	-0.74 ± 0.17	0.42	-0.92	0.41	0.42	0.21	0.11 ± 0.58	-0.65	-0.26	-0.46	-1.02	-0.59	-0.84	-0.73 ± 0.25	-0.41	0.03	-0.74	0.05	0.19	-0.56	-0.27 ± 0.45	-0.77	-0.45	-0.33	-0.42	-1.13
BcaccTSDC17_03303	-0.65	-0.69	-1.27	-0.93	-0.87	-0.88 ± 0.25	-0.17	-0.71	-0.74	-0.33	-1.12	-0.62 ± 0.38	0.87	-0.53	-0.55	0.33	-1.07	-0.19 ± 0.78	-0.73	-0.15	-0.74	-0.88	-0.33	-0.57 ± 0.31	-1.36	-0.95	-0.95	-0.8	-0.6	-0.93 ± 0.28	1.38	0.83	0.63	0.41	-0.07	0.32	0.32 ± 0.29	-0.09	-0.95	-0.36	-1.03	0.77	-1.12	-0.44 ± 0.87	0.36	0.87	0.39	-0.72	0.8
BcaccTSDC17_03321	-	-	-	-	-	-	-	-	-	-	-	-	-	-	-	-	-	-	-	-	-	-	-	-	-0.35	-0.64	-0.71	-1.08	-0.17	-0.59 ± 0.35	-1.13	-0.78	-0.89	-1.11	-0.88	-0.91	-0.95 ± 0.11	-0.7	-1.09	-0.82	-1.21	-0.71	-1.06	-0.95 ± 0.22	-0.04	-0.89	-0.37	-0.15	-0.33
BcaccTSDC17_03336	-1.04	-0.49	0.59	0.1	0.54	-0.06 ± 0.7	-0.22	0.27	0.05	0.22	0.08	0.08 ± 0.19	-0.59	-1.22	-0.06	-0.35	-0.06	-0.46 ± 0.48	-0.46	-0.24	-0.28	0.27	-0.35	-0.21 ± 0.28	-0.66	-0.1	0.01	0.07	-0.77	-0.29 ± 0.4	0.04	0.8	0	-0.24	-0.21	0.09	-0.09 ± 0.16	0.86	0.02	0.25	-0.38	-0.27	0.21	-0.05 ± 0.32	-0.11	0.48	0.03	0.21	0.04
BcaccTSDC17_03337	-1.21	0.38	-0.85	-0.81	-0.65	-0.63 ± 0.6	-0.91	-0.69	-0.98	-0.67	-0.8	-0.81 ± 0.13	-0.5	-0.61	-1.05	-0.8	-1.42	-0.88 ± 0.37	-0.77	-0.6	-0.94	-1.28	-1.22	-0.96 ± 0.29	-	-	-	-	-	-	-	-	-	-	-	-	-	-	-	-	-	-	-	-	-	-	-	-	-
BcaccTSDC17_03340	-	-	-	-	-	-	-	-	-	-	-	-	-	-	-	-	-	-	-	-	-	-	-	-	-1.53	-1.32	0.05	0.94	0.67	-0.24 ± 1.14	2.14	1.54	1	1.45	1.97	1.7	1.53 ± 0.41	1.43	1.66	1.88	1.34	2.31	1.4	1.73 ± 0.45	1.64	1.97	2.11	2.23	2.17
BcaccTSDC17_03346	-1.54	0.03	-1.02	-1.04	-1.05	-0.93 ± 0.58	0.15	-0.96	-1.19	-1.17	-1.07	-0.85 ± 0.57	-0.61	-1.02	-1.29	-0.73	-1.25	-0.98 ± 0.3	-1.04	-1.22	-0.79	-0.77	-0.73	-0.91 ± 0.21	-1.02	-0.75	-0.85	-0.98	-0.18	-0.75 ± 0.34	-0.69	-0.28	-0.81	1.29	-0.68	-0.78	-0.24 ± 1.03	-0.87	-0.9	-0.72	-0.78	-0.55	-0.62	-0.66 ± 0.1	-0.59	-0.89	-0.94	-1.1	-0.7
BcaccTSDC17_03387	-0.79	-1.71	0.28	-1.06	-1.32	-0.92 ± 0.75	-0.9	-0.71	0.39	0.44	0.48	-0.06 ± 0.68	-0.86	-0.63	-0.95	-1.15	-0.77	-0.87 ± 0.2	-0.8	-1.1	-0.88	-1.35	-0.8	-0.99 ± 0.23	-0.73	-1.13	-0.73	-0.73	-1.32	-0.93 ± 0.28	-0.99	-0.46	-0.34	-0.64	-0.23	-0.56	-0.44 ± 0.19	-0.2	-1.03	0.09	0.36	0.8	-0.47	0.2 ± 0.53	-1.03	-0.55	-0.53	-0.6	0.26
BcaccTSDC17_03404	-0.52	-1.65	-1	-1.18	1.19	-0.63 ± 1.09	0.57	0.55	-0.75	0.24	-1.22	-0.12 ± 0.82	0.77	-0.66	-0.86	-0.94	-0.67	-0.47 ± 0.71	-0.77	-0.75	-0.58	-1.2	-0.87	-0.84 ± 0.23	-0.64	-0.66	0.14	-1.2	-0.31	-0.53 ± 0.5	-0.27	-0.36	-0.98	-0.73	-0.51	-0.08	-0.58 ± 0.38	0.03	-0.8	-0.13	-0.06	0.36	-0.74	-0.14 ± 0.45	-1.03	-0.74	1.48	1.36	0.34
BcaccTSDC17_03409	1.29	-0.02	-1.13	0.23	-1.25	-0.18 ± 1.05	0.97	-0.84	-0.46	-0.35	-1.04	-0.35 ± 0.79	-0.36	-0.3	-0.32	-0.79	-0.4	-0.43 ± 0.2	-0.29	1.3	-0.79	-0.38	-0.42	-0.12 ± 0.81	0.59	0.02	0.43	-0.56	-0.44	0.01 ± 0.51	-0.84	-0.17	0.35	0.16	0.97	-0.32	0.29 ± 0.53	-0.04	-0.59	0.67	0.63	-0.97	-1.45	-0.28 ± 1.09	-0.67	0.61	-1.42	-0.14	0.91
BcaccTSDC17_03423	-	-	-	-	-	-	-	-	-	-	-	-	-	-	-	-	-	-	-	-	-	-	-	-	-0.89	-0.31	-0.97	-0.57	-1.12	-0.77 ± 0.33	-0.28	-0.35	0.66	-1.38	-0.74	-0.4	-0.47 ± 0.85	-0.52	-0.8	-0.77	-0.57	-1.04	-0.57	-0.74 ± 0.22	-1.18	-1.05	-0.87	-0.42	-0.86
BcaccTSDC17_03478	-	-	-	-	-	-	-	-	-	-	-	-	-	-	-	-	-	-	-	-	-	-	-	-	-0.07	-0.57	-0.03	-0.95	-0.4	-0.4 ± 0.38	-0.23	0.07	0.05	-1.24	0.36	-0.02	-0.21 ± 0.7	-0.41	-0.02	-0.66	-0.15	0.18	-0.32	-0.24 ± 0.35	-0.78	1.5	-0.8	0.01	-0.76
BcaccTSDC17_03479	-	-	-	-	-	-	-	-	-	-	-	-	-	-	-	-	-	-	-	-	-	-	-	-	-0.59	-0.62	0.81	-0.72	-0.69	-0.36 ± 0.66	-0.48	-0.76	-0.86	-0.8	-0.59	-0.35	-0.65 ± 0.23	-0.97	-0.06	-0.79	-0.75	-0.34	-0.41	-0.57 ± 0.23	0.25	-0.3	-0.53	-1.03	-1.12
BcaccTSDC17_03481	-	-	-	-	-	-	-	-	-	-	-	-	-	-	-	-	-	-	-	-	-	-	-	-	0.69	0.14	-0.91	-0.59	-1	-0.33 ± 0.73	-0.23	-0.16	0.17	-0.75	-0.63	-0.2	-0.35 ± 0.42	-0.56	0.07	-0.43	-0.51	-0.72	-0.71	-0.59 ± 0.14	-0.87	-0.67	-0.61	-1.08	-0.88
BcaccTSDC17_03487	-	-	-	-	-	-	-	-	-	-	-	-	-	-	-	-	-	-	-	-	-	-	-	-	1.03	1.03	-0.93	-0.35	-1.02	-0.05 ± 1.02	-0.88	-1.04	0.42	-0.95	-0.98	-0.77	-0.57 ± 0.67	-0.43	-0.95	-0.71	-0.49	-0.74	0.33	-0.4 ± 0.5	-0.94	0.66	-0.35	-0.47	-0.99
BcaccTSDC17_03528	-0.31	0.56	-0.23	0.41	-0.29	0.03 ± 0.42	-0.48	-0.51	-1.04	-0.71	-0.37	-0.62 ± 0.27	-0.64	-1.23	-0.42	0.63	-0.66	-0.47 ± 0.68	-0.4	-0.37	0.42	-0.78	-0.37	-0.3 ± 0.44	0.13	0.68	0.21	1.06	0.31	0.48 ± 0.39	-0.53	-0.21	0.89	-1.3	-0.51	0.52	-0.1 ± 1	-0.38	-0.27	-0.1	-0.76	-1.04	0.97	-0.23 ± 0.89	-0.96	-1.26	-1.12	0.71	-0.74
BcaccTSDC17_03537	-	-	-	-	-	-	-	-	-	-	-	-	-	-	-	-	-	-	-	-	-	-	-	-	-0.83	-0.77	-0.31	0.1	-0.82	-0.52 ± 0.41	-0.14	-0.49	-0.75	-1.04	-0.54	-1.2	-0.88 ± 0.29	-0.78	-0.96	-0.8	-0.8	-0.63	-1.09	-0.83 ± 0.19	-0.95	-0.3	-0.42	-0.6	-0.84
BcaccTSDC17_03561	-	-	-	-	-	-	-	-	-	-	-	-	-	-	-	-	-	-	-	-	-	-	-	-	-0.79	-0.78	-0.38	-1.18	-1.25	-0.88 ± 0.35	-0.91	-1.23	-0.74	-0.64	-0.86	-1.02	-0.82 ± 0.16	-0.57	-0.76	-0.69	-0.85	-0.63	-0.27	-0.61 ± 0.25	-0.5	-0.96	-1.09	-0.24	-0.62
BcaccTSDC17_03597	0.74	-1.14	-0.82	-1.14	-1.01	-0.67 ± 0.8	-0.81	-0.73	-0.63	0.38	-0.68	-0.49 ± 0.49	-0.3	-0.81	-1.14	-0.51	-0.73	-0.7 ± 0.32	-0.65	-0.55	-0.7	-1.02	-0.83	-0.75 ± 0.18	-1.48	-0.87	-0.49	-0.92	-0.92	-0.94 ± 0.35	-0.96	-1.2	-0.34	-0.74	-0.72	-1.14	-0.74 ± 0.33	-0.78	-1.37	-0.69	-0.84	-0.55	-0.87	-0.74 ± 0.15	-1.3	-0.69	-1.23	-1	-1.53
BcaccTSDC17_03598	-0.93	-1.51	-1.08	-1.14	-0.78	-1.09 ± 0.27	0.15	-1.17	0.51	-0.88	-0.2	-0.32 ± 0.7	-0.79	-0.47	-0.87	-0.41	-0.86	-0.68 ± 0.22	-0.48	-0.62	0.58	-0.76	-1.24	-0.5 ± 0.67	-0.23	-0.86	-1.23	-1.02	-0.55	-0.78 ± 0.39	-0.89	-0.72	-0.59	-0.64	-1	-0.76	-0.75 ± 0.18	-1.04	-0.51	-0.34	-0.73	-0.74	-0.88	-0.67 ± 0.23	-0.56	-1.31	-1.03	-0.97	-0.96
BcaccTSDC17_03633	-0.77	0.48	1.23	-1.13	-0.19	-0.08 ± 0.95	-1.12	-0.74	-0.97	-0.74	-0.65	-0.84 ± 0.19	-0.63	-0.87	-0.9	-0.95	-0.28	-0.73 ± 0.28	-1.25	-0.33	-0.59	-0.79	-0.48	-0.69 ± 0.36	0.28	0.53	-0.49	-0.18	-1.23	-0.22 ± 0.69	0.13	-0.5	0.19	0.17	-0.24	-0.6	-0.12 ± 0.38	-0.88	-0.95	-0.71	0.15	-0.92	-0.59	-0.52 ± 0.47	-0.86	-0.78	-0.34	-0.67	-0.5
BcaccTSDC17_03635	-	-	-	-	-	-	-	-	-	-	-	-	-	-	-	-	-	-	-	-	-	-	-	-	-0.08	-0.45	-0.45	-0.9	-1.31	-0.64 ± 0.47	-0.56	-0.43	-0.71	-0.66	-0.22	-0.53	-0.53 ± 0.22	-0.19	-0.35	-0.39	-0.87	-0.91	-0.85	-0.75 ± 0.25	0.21	0.2	-0.37	-0.87	-0.66
BcaccTSDC17_03653	1.71	1.27	1.56	1.52	1.38	1.49 ± 0.17	1.49	1.53	1.41	1.33	1.52	1.46 ± 0.09	1.52	1.52	1.67	1.68	1.69	1.62 ± 0.09	1.51	1.61	1.88	1.71	1.72	1.69 ± 0.14	1.72	1.71	1.71	1.88	1.88	1.78 ± 0.09	1.85	1.8	1.61	1.91	1.68	1.56	1.69 ± 0.16	1.65	1.92	1.65	1.93	1.83	1.88	1.82 ± 0.13	1.9	1.98	1.89	1.75	2.02
BcaccTSDC17_03654	1.92	2.2	2.44	2.44	2.31	2.26 ± 0.22	2.27	2.03	2.46	2.36	2.31	2.29 ± 0.16	2.3	2.47	2.43	2.41	2.12	2.34 ± 0.14	1.98	2.15	2.48	2.51	2.19	2.26 ± 0.23	2.29	2.81	2.44	2.28	2.55	2.47 ± 0.22	2.61	2.49	2.36	2.53	2.77	2.66	2.58 ± 0.18	2.36	2.67	2.53	2.61	2.47	2.67	2.57 ± 0.09	2.56	2.45	2.64	2.39	2.48
BcaccTSDC17_03667	-	-	-	-	-	-	-	-	-	-	-	-	-	-	-	-	-	-	-	-	-	-	-	-	-0.99	-0.7	-0.82	-1.02	-1.59	-1.02 ± 0.34	-0.41	-1.08	0.4	-0.63	-0.66	-0.54	-0.36 ± 0.51	-0.32	-0.6	-0.39	0.19	-0.8	0.42	-0.14 ± 0.56	0.2	-0.36	-0.9	-0.72	-0.55
BcaccTSDC17_03689	-0.35	-1.08	-1.25	-1.03	-0.88	-0.92 ± 0.35	0.06	-1.1	-0.55	0.67	0.36	-0.11 ± 0.71	-0.7	-0.86	-1.05	-0.15	-0.95	-0.74 ± 0.35	-0.29	-0.88	-0.5	-0.69	-0.79	-0.63 ± 0.24	-	-	-	-	-	-	-	-	-	-	-	-	-	-	-	-	-	-	-	-	-	-	-	-	-
BcaccTSDC17_03698	-	-	-	-	-	-	-	-	-	-	-	-	-	-	-	-	-	-	-	-	-	-	-	-	-0.49	-0.54	-1.31	-0.44	-1.03	-0.76 ± 0.39	-0.69	-0.78	-0.83	-0.83	-0.67	-0.4	-0.68 ± 0.2	-0.01	-1.11	-0.52	-0.97	0.04	-0.74	-0.55 ± 0.43	0.16	-0.71	-0.22	0.32	0.63
BcaccTSDC17_03702	-0.9	-1.05	-1.01	-0.71	-0.72	-0.88 ± 0.16	-0.75	-0.82	-0.85	-1.19	-0.98	-0.92 ± 0.18	-1	-0.82	-0.72	-0.85	-0.91	-0.86 ± 0.11	-0.92	-1.11	-1.12	-0.75	-1	-0.98 ± 0.15	-0.22	-0.5	-1.15	-0.93	-0.65	-0.69 ± 0.36	-0.78	-0.62	0.18	-0.9	-0.32	-0.77	-0.45 ± 0.49	-0.34	-0.6	-0.88	-1.04	-0.66	-0.72	-0.83 ± 0.17	-0.77	-1.02	-0.78	-1.05	-0.87
BcaccTSDC17_03704	-0.33	-1.84	0.51	0.45	-1.12	-0.47 ± 1.02	0.19	-1.05	-0.26	-0.99	-0.68	-0.56 ± 0.52	-0.7	-0.21	-0.77	-0.36	0.77	-0.25 ± 0.62	-0.39	-0.89	-1.02	-0.92	-0.79	-0.8 ± 0.24	0.56	1.01	-0.19	-0.1	-1.1	0.04 ± 0.8	-0.91	1.1	-0.57	-0.08	0.46	0.29	0.02 ± 0.45	-0.43	0.11	-0.97	-0.1	0.13	-0.09	-0.26 ± 0.48	-0.17	-0.91	0.39	-0.29	-0.1
BcaccTSDC17_03707	1.64	1.7	1.25	1.43	1.35	1.48 ± 0.19	1.3	1.45	0.97	1.3	1.45	1.29 ± 0.2	0.74	1.38	1.44	0.93	1.33	1.16 ± 0.31	1	1.09	0.85	1.28	0.88	1.02 ± 0.18	1.54	1.38	1.53	2.05	1.61	1.62 ± 0.25	0.77	0.51	1.31	1.26	1.7	1.45	1.43 ± 0.2	2.1	1.5	1.7	1.51	1.49	1.6	1.57 ± 0.09	1.47	1.58	1.32	0.83	1.17
BcaccTSDC17_03710	-0.83	0.32	-0.98	-0.64	-1.03	-0.63 ± 0.56	-0.34	-0.99	-1.03	-0.75	-0.55	-0.73 ± 0.29	-0.59	-1.09	-0.98	-0.78	-0.68	-0.83 ± 0.21	-0.84	-1.1	-0.99	-0.95	-1.44	-1.06 ± 0.23	-0.83	-1.02	-1.21	-0.96	-0.82	-0.97 ± 0.16	-0.73	-1.29	-0.76	-0.79	-0.79	-0.78	-0.78 ± 0.02	-0.85	-0.79	-0.73	-1.05	-0.72	-0.9	-0.85 ± 0.16	0.15	-0.65	-0.98	-0.18	-0.67
BcaccTSDC17_03711	-0.81	-0.28	-0.59	-1	-0.65	-0.67 ± 0.27	-0.06	-0.89	-0.97	-1.13	-0.83	-0.78 ± 0.41	-1.25	-1.09	-0.45	-1.43	-0.97	-1.04 ± 0.37	-0.66	-0.5	-1.33	-0.65	-0.7	-0.77 ± 0.32	-0.75	-1.11	-0.61	-0.71	-0.87	-0.81 ± 0.19	-1.06	-0.65	-0.82	-0.81	-1.02	-0.76	-0.85 ± 0.12	-0.48	-0.94	-0.41	-0.55	-0.65	0.24	-0.34 ± 0.4	-0.52	-0.63	-0.76	-0.92	-0.99
BcaccTSDC17_03712	-0.01	0.44	0.76	0.6	0.75	0.51 ± 0.32	1.1	1.83	1.84	1.59	1.24	1.52 ± 0.34	1.66	1.08	1.42	1.52	1.26	1.39 ± 0.22	-0.26	0.82	1.69	1.13	1.12	0.9 ± 0.72	0.01	0.28	0.49	0.76	0.51	0.41 ± 0.28	1.13	0.61	1.11	1.1	0.95	1.81	1.24 ± 0.39	-0.85	0.93	0.9	1.18	1.01	0.97	1.01 ± 0.12	0.78	1.08	0.51	0.87	1.42
BcaccTSDC17_03728	-0.37	-0.06	0.13	0.06	0.11	-0.03 ± 0.21	-0.28	-0.61	-0.66	-0.62	0.31	-0.37 ± 0.41	-0.23	0.35	-0.48	-0.82	-0.68	-0.37 ± 0.46	0.03	-0.68	-0.22	-0.19	-0.65	-0.34 ± 0.31	-1.04	0.4	0.18	1.09	0.47	0.22 ± 0.78	1.06	-0.47	0.01	-0.32	-0.95	-0.25	-0.38 ± 0.41	-0.26	0.4	-1.11	-1.29	0.65	-0.24	-0.5 ± 0.89	-0.5	0.74	0.3	0.63	-0.54
BcaccTSDC17_03729	0.92	0.3	0.42	0.41	-0.2	0.37 ± 0.4	-0.24	-0.88	-0.02	-1.44	-0.33	-0.58 ± 0.57	0.48	0.75	0.74	-0.16	0.41	0.44 ± 0.37	-0.12	-1.15	-0.21	-1.23	-0.53	-0.65 ± 0.52	0.84	-0.78	0.25	0.78	-0.54	0.11 ± 0.74	0.25	-0.35	-1.52	0.06	-0.58	-0.32	-0.59 ± 0.67	-0.56	0.81	0.56	0.32	0.15	-1.42	-0.1 ± 0.9	-0.31	0.65	0.32	0.32	-0.79
BcaccTSDC17_03756	-	-	-	-	-	-	-	-	-	-	-	-	-	-	-	-	-	-	-	-	-	-	-	-	-1.64	-0.76	-0.87	-1.33	-0.22	-0.96 ± 0.55	0.44	0	0.29	0.37	0.44	-0.42	0.17 ± 0.4	0.07	0.62	0.4	0.26	0.26	0.4	0.33 ± 0.08	0.31	0.57	0.23	0.54	0.6
BcaccTSDC17_03760	-1.33	-0.18	-1.03	-0.79	-0.56	-0.78 ± 0.44	-0.56	-0.87	-0.88	-0.73	-0.8	-0.77 ± 0.13	-0.93	-1.2	-0.79	-0.64	-0.89	-0.89 ± 0.2	-0.84	-0.44	-1.1	-0.32	-1.1	-0.76 ± 0.37	-	-	-	-	-	-	-	-	-	-	-	-	-	-	-	-	-	-	-	-	-	-	-	-	-
BcaccTSDC17_03770	-0.79	0	-1.37	-1.21	-0.51	-0.78 ± 0.55	-0.72	-0.53	-0.41	-0.8	-0.19	-0.53 ± 0.24	-0.92	-0.54	-0.8	-0.5	-0.61	-0.67 ± 0.18	-0.35	-0.94	-1.02	-0.57	-0.7	-0.72 ± 0.27	-0.62	-0.74	-0.08	-0.53	-0.01	-0.4 ± 0.33	0.36	-0.26	0.19	-0.19	-0.57	-0.04	-0.15 ± 0.32	0.4	0.29	-0.09	0.04	0.24	0.02	0.05 ± 0.14	0.25	0.1	0.39	0.11	-1.13
BcaccTSDC17_03999	0.28	-1.38	0.24	-0.39	-0.8	-0.41 ± 0.71	-1.15	-0.6	-0.84	-0.7	-1	-0.86 ± 0.22	-0.8	-0.58	-0.65	-1.57	-0.84	-0.89 ± 0.39	-0.59	-0.87	-1.17	-1.3	-0.42	-0.87 ± 0.38	-0.88	-0.42	-0.86	1.28	-0.27	-0.23 ± 0.89	-0.87	-0.83	-1.1	-0.52	-0.87	-1	-0.87 ± 0.26	-0.66	-0.75	-0.37	-0.67	-0.67	-0.34	-0.51 ± 0.18	-1.01	-0.55	-0.88	-0.28	-0.68
BcaccTSDC17_04000	0.34	-1.53	-0.84	-0.83	-0.64	-0.7 ± 0.67	-0.79	0.46	-0.67	-0.8	-0.62	-0.48 ± 0.53	-0.77	-0.88	-0.86	-0.64	-0.63	-0.75 ± 0.12	-1.09	-1.1	-0.53	-1.31	-1.34	-1.07 ± 0.32	-	-	-	-	-	-	-	-	-	-	-	-	-	-	-	-	-	-	-	-	-	-	-	-	-
BcaccTSDC17_04003	-0.08	-0.06	-1.57	-0.73	-1.2	-0.73 ± 0.67	-0.08	-0.62	0.11	0.24	-0.1	-0.09 ± 0.33	0.39	-1.14	0.61	0.18	1.92	0.39 ± 1.09	0.04	0.2	1.13	0.59	0.95	0.58 ± 0.47	0.05	0.55	-0.62	-0.13	-0.37	-0.1 ± 0.45	-0.14	1.1	0.82	-0.97	-0.16	-0.18	-0.12 ± 0.73	-0.27	0.47	-0.96	-0.1	0.63	-1.18	-0.4 ± 0.83	-0.72	-0.56	-0.73	-1.3	0.83
BcaccTSDC17_04008	0.21	-0.15	-0.64	0.01	-0.9	-0.29 ± 0.46	-1.59	-0.03	-0.77	-1.17	-0.8	-0.87 ± 0.57	0.12	-0.86	-0.42	0.45	-0.23	-0.19 ± 0.5	-1.59	-0.49	-0.52	-0.57	-0.32	-0.7 ± 0.51	-0.17	-0.2	-0.92	-0.34	-0.11	-0.35 ± 0.33	0.39	-0.45	-0.81	0.01	-0.61	-0.55	-0.49 ± 0.35	-0.2	0.31	-0.99	-0.14	-0.5	0.76	-0.22 ± 0.74	-0.3	-0.7	-0.64	0.26	-0.99
BcaccTSDC17_04027	-	-	-	-	-	-	-	-	-	-	-	-	-	-	-	-	-	-	-	-	-	-	-	-	-0.99	0.67	-0.66	-0.65	-1.11	-0.55 ± 0.71	-0.56	-0.9	0.07	-1.24	-0.3	-0.54	-0.5 ± 0.55	-0.15	-0.15	-0.05	-0.92	0.39	0.32	-0.07 ± 0.6	-0.13	1	-0.4	-1.13	0.17
BcaccTSDC17_04062	-0.97	0.77	0.53	0.39	0.8	0.3 ± 0.73	1.1	0.91	0.68	1.02	1.12	0.97 ± 0.18	0.99	0.54	1.09	0.68	0.68	0.8 ± 0.23	-0.51	0.59	0.61	0.76	0.74	0.44 ± 0.54	0.99	-1.16	-1.54	-0.89	-2.06	-0.93 ± 1.16	1.7	2.01	0.86	0.67	1.38	-0.78	0.53 ± 0.92	1.82	-1.35	0.41	-1.63	0.9	0.66	0.08 ± 1.16	0	-0.92	0.81	-1.15	-0.93
BcaccTSDC17_04064	1.1	1.5	0.77	0.76	0.63	0.95 ± 0.35	1.25	0.94	1.37	1.12	0.65	1.06 ± 0.28	0.82	0.62	0.98	1.18	1.07	0.93 ± 0.22	1.11	0.6	0.55	0.84	0.97	0.81 ± 0.24	1.38	1.43	1.08	1.21	0.92	1.21 ± 0.21	1.36	1.25	1.27	1.15	0.08	1.33	0.95 ± 0.59	1.86	1.19	1.39	1.21	1.1	1.19	1.22 ± 0.12	0.72	1.18	0.58	1.07	0.81
BcaccTSDC17_04087	-	-	-	-	-	-	-	-	-	-	-	-	-	-	-	-	-	-	-	-	-	-	-	-	-0.77	-0.67	-0.63	-0.96	-0.36	-0.68 ± 0.22	-0.13	0.01	-0.82	-0.7	-0.64	-0.81	-0.74 ± 0.09	-0.97	-0.83	-0.85	-0.99	-0.25	-0.53	-0.66 ± 0.33	-0.65	-0.94	-0.9	-0.82	-0.63
BcaccTSDC17_04095	-0.41	-1.1	-0.8	-0.9	-0.81	-0.8 ± 0.25	-0.97	-1	-0.68	-1.14	0.06	-0.75 ± 0.48	-0.44	0.1	-0.8	-0.89	-0.64	-0.53 ± 0.4	-0.85	-0.87	-0.26	1.19	-0.19	-0.2 ± 0.84	-	-	-	-	-	-	-	-	-	-	-	-	-	-	-	-	-	-	-	-	-	-	-	-	-
BcaccTSDC17_04096	0.83	0.45	-0.35	-0.66	-1.86	-0.32 ± 1.05	-1.66	-0.68	0.58	0.32	0.23	-0.24 ± 0.92	-0.78	-0.58	-0.83	-0.6	0.88	-0.38 ± 0.71	-0.36	0.67	1.11	-0.6	-0.47	0.07 ± 0.77	-	-	-	-	-	-	-	-	-	-	-	-	-	-	-	-	-	-	-	-	-	-	-	-	-
BcaccTSDC17_04097	-	-	-	-	-	-	-	-	-	-	-	-	-	-	-	-	-	-	-	-	-	-	-	-	-0.72	-0.94	-0.8	-0.62	-1.04	-0.83 ± 0.17	-0.72	-0.54	-0.43	-0.43	-0.94	-0.74	-0.64 ± 0.25	-0.75	-0.52	-0.77	-0.36	0.05	-1.1	-0.54 ± 0.5	-1.05	-0.98	-0.85	-0.46	-0.21
BcaccTSDC17_04105	-	-	-	-	-	-	-	-	-	-	-	-	-	-	-	-	-	-	-	-	-	-	-	-	-0.39	-0.67	0.48	0.38	0.23	0.01 ± 0.51	-0.65	-1.01	-0.76	-0.71	-0.23	-1.01	-0.68 ± 0.32	-0.99	-0.99	-0.5	-0.67	-0.84	-0.61	-0.66 ± 0.14	-1.2	-1.03	0.05	-0.65	-1.53
BcaccTSDC17_04186	-	-	-	-	-	-	-	-	-	-	-	-	-	-	-	-	-	-	-	-	-	-	-	-	-0.69	-0.82	-0.7	0.17	-0.24	-0.46 ± 0.41	-0.24	-1.27	-0.59	-0.63	-0.96	-0.42	-0.65 ± 0.23	0.27	0.04	-0.78	-0.68	-0.02	0.26	-0.31 ± 0.51	0.39	-0.37	-0.22	0.27	0.32
BcaccTSDC17_04198	-0.72	-0.64	0.42	-0.56	-1	-0.5 ± 0.54	-0.31	-0.67	-0.6	-0.99	-0.76	-0.66 ± 0.25	-0.47	-0.42	-0.67	-0.66	-1.01	-0.65 ± 0.23	-0.34	-0.78	-0.92	0.14	-0.93	-0.57 ± 0.46	-0.42	0.03	0.14	0.57	-0.15	0.03 ± 0.37	-0.52	-0.21	-1.37	0.17	-0.04	0.51	-0.18 ± 0.83	-0.14	0.29	-0.43	0.44	0.32	0.15	0.12 ± 0.39	-1.47	-0.85	-0.58	0.54	0.8
BcaccTSDC17_04202	-0.91	0.22	-0.8	-1.17	-0.77	-0.69 ± 0.53	-0.76	-1.26	-0.92	-0.88	-0.85	-0.93 ± 0.19	-1.09	-0.54	-1.26	-1.12	-1.47	-1.1 ± 0.35	-1.21	-0.66	-0.98	0.25	-0.73	-0.67 ± 0.56	-	-	-	-	-	-	-	-	-	-	-	-	-	-	-	-	-	-	-	-	-	-	-	-	-
BcaccTSDC17_04227	-	-	-	-	-	-	-	-	-	-	-	-	-	-	-	-	-	-	-	-	-	-	-	-	-0.35	-0.71	-0.67	-0.58	-0.91	-0.64 ± 0.2	-0.56	-1.14	-0.27	-0.35	-0.48	-0.79	-0.47 ± 0.23	-0.28	-0.45	-0.12	-0.71	-0.34	-0.69	-0.47 ± 0.29	-0.55	-0.79	-0.94	-0.67	-0.05
BcaccTSDC17_04228	-	-	-	-	-	-	-	-	-	-	-	-	-	-	-	-	-	-	-	-	-	-	-	-	-0.92	-0.65	-0.45	-0.44	-0.52	-0.59 ± 0.2	-0.64	-0.85	-1.03	-0.71	-0.64	-0.82	-0.8 ± 0.17	-0.94	-1.07	-0.08	-0.68	-0.71	-0.35	-0.45 ± 0.3	-0.75	-1.08	-0.58	-0.66	-0.46
BcaccTSDC17_04258	1.4	1.59	1.48	1.66	1.55	1.54 ± 0.1	1.72	1.74	1.78	1.88	1.79	1.78 ± 0.06	1.91	1.85	1.85	1.74	1.78	1.83 ± 0.07	1.66	2.23	2.16	2.07	2.18	2.06 ± 0.23	1.72	1.82	1.88	1.73	1.75	1.78 ± 0.07	1.93	2.03	1.82	1.87	1.92	1.96	1.89 ± 0.06	1.91	2	2.16	1.93	1.92	2.04	2.01 ± 0.11	2.1	2.05	1.93	2.12	1.89
BcaccTSDC17_04260	-0.38	-1.72	0.09	-1.09	-1.2	-0.86 ± 0.71	-1.57	-0.51	-0.35	-0.82	1.18	-0.41 ± 1.01	-0.62	1.74	0.96	1.1	-0.44	0.55 ± 1.03	-0.44	1.4	-0.28	-0.39	-0.6	-0.06 ± 0.82	1.6	1.31	1.23	1.42	1.49	1.41 ± 0.15	1.11	0.89	0.77	1.37	1.47	1.5	1.28 ± 0.34	1.69	1.53	1.51	1.23	1.32	1.27	1.33 ± 0.12	1.54	1.59	1.31	1.52	1.31
BcaccTSDC17_04261	1.31	1.3	1.4	1.5	1.59	1.42 ± 0.13	1.47	1.51	1.36	1.27	1.3	1.38 ± 0.1	1.62	1.45	1.46	1.47	1.55	1.51 ± 0.07	0.55	1.54	1.74	1.4	1.83	1.41 ± 0.51	1.43	1.7	1.65	1.56	1.74	1.61 ± 0.12	1.57	1.45	1.33	1.69	1.22	1.45	1.42 ± 0.2	1.65	1.52	1.47	1.61	1.72	1.51	1.58 ± 0.11	1.65	1.81	1.79	1.76	1.86
BcaccTSDC17_04272	0.47	0.45	0.15	0.59	0.76	0.48 ± 0.23	0.03	0.32	0.59	0.14	0.14	0.24 ± 0.22	0.72	0.66	0.55	0.24	0.62	0.56 ± 0.19	1.11	0.57	0.82	0.65	1.11	0.85 ± 0.25	0.36	0.37	-0.02	0.33	0.25	0.26 ± 0.16	0.17	0.15	-0.73	0.44	-0.26	0.16	-0.1 ± 0.51	-0.08	-0.32	0	0.53	-0.21	-0.15	0.04 ± 0.34	0.24	-0.22	0.69	0.17	-1.01
BcaccTSDC17_04279	-0.53	-0.08	0.73	0.89	0.65	0.33 ± 0.61	-0.23	0.73	0.15	-1.28	-1.56	-0.44 ± 0.96	-0.79	-0.64	-0.06	0.02	-0.46	-0.38 ± 0.36	-0.28	-0.26	-0.31	0.32	-0.23	-0.15 ± 0.27	0.51	0.74	-1.01	1.16	0.18	0.31 ± 0.82	-0.41	-0.73	-0.09	-1.05	-0.2	-0.24	-0.4 ± 0.44	-0.36	-1.01	0.66	0.46	-0.78	0.91	0.31 ± 0.75	0.42	0.42	-0.8	-0.91	-1.12
BcaccTSDC17_04332	-0.92	-2.26	-1.79	-1.3	-1.26	-1.51 ± 0.52	1.19	1.41	1.14	1.3	1.71	1.35 ± 0.22	0.13	0.41	-0.13	0.35	-0.92	-0.03 ± 0.54	-0.29	-0.94	-0.47	-0.28	0.11	-0.38 ± 0.38	-0.96	-0.97	-1.44	-0.6	-1.52	-1.1 ± 0.38	2.28	1.19	1.26	1.6	2.05	2.33	1.81 ± 0.47	0.2	-0.92	-1.1	0.38	0.49	0.02	-0.05 ± 0.73	-1.02	-1.11	-1.23	-0.77	-1.04
BcaccTSDC17_04341	-	-	-	-	-	-	-	-	-	-	-	-	-	-	-	-	-	-	-	-	-	-	-	-	-0.74	-0.58	-0.43	-0.58	-0.89	-0.65 ± 0.18	-0.96	-1.15	0.4	1.61	-0.74	-0.74	0.13 ± 1.12	-0.85	-0.58	-0.78	-1.03	-1.08	-0.56	-0.86 ± 0.24	-0.95	-1.02	-0.76	-0.95	-0.58
BcaccTSDC17_04383	-	-	-	-	-	-	-	-	-	-	-	-	-	-	-	-	-	-	-	-	-	-	-	-	0.34	-0.44	-0.87	-1.26	-0.59	-0.56 ± 0.59	-0.79	-0.66	-0.74	-0.9	-0.43	-1.06	-0.78 ± 0.27	-0.89	-1.15	-0.75	-0.52	-0.41	-0.66	-0.58 ± 0.15	-0.72	-0.4	-0.6	-1.05	-0.81
BcaccTSDC17_04407	1.06	-0.22	0.28	-0.2	-0.05	0.17 ± 0.53	-0.42	-0.49	0.06	0.3	-0.82	-0.27 ± 0.45	0.07	-0.39	-0.95	-0.44	-0.41	-0.43 ± 0.36	0.02	-1.23	-0.25	-0.27	0	-0.35 ± 0.51	0.23	0.61	0	0.82	0.27	0.39 ± 0.33	0.35	-0.51	0.34	0.32	0.29	-0.31	0.16 ± 0.31	0.12	-1.14	-0.04	-0.29	-0.79	-0.27	-0.35 ± 0.32	-1.14	-0.42	-0.47	-0.11	-1.18
BcaccTSDC17_04487	-	-	-	-	-	-	-	-	-	-	-	-	-	-	-	-	-	-	-	-	-	-	-	-	-0.18	-0.89	-0.77	-0.79	-1.01	-0.73 ± 0.32	-0.87	-1.22	0.39	0.32	-0.48	-0.78	-0.14 ± 0.59	-0.99	-1.08	-0.83	-1.34	-1.38	-0.7	-1.06 ± 0.35	-0.43	-1.04	-0.85	-0.76	-0.67
BcaccTSDC17_04495	-0.35	-0.39	0.49	-0.56	0.04	-0.15 ± 0.42	0.02	0.38	-1.18	-1.04	-0.48	-0.46 ± 0.67	-0.59	-0.17	-0.47	-0.24	-0.23	-0.34 ± 0.18	-0.24	-0.91	-0.62	-0.6	-0.34	-0.54 ± 0.26	0.16	-0.75	0.24	-0.12	-1.32	-0.36 ± 0.66	-0.53	1.14	0.67	-0.98	-1.07	-0.7	-0.52 ± 0.81	-0.38	-1.24	-0.64	-0.57	-0.44	-1.03	-0.67 ± 0.25	0.58	0.15	-0.95	-0.55	-0.39
BcaccTSDC17_04500	-	-	-	-	-	-	-	-	-	-	-	-	-	-	-	-	-	-	-	-	-	-	-	-	-0.89	-0.19	-0.89	-0.79	-0.94	-0.74 ± 0.31	-0.66	-0.55	0.97	0.09	-0.44	-0.86	-0.06 ± 0.79	0.48	-0.83	-0.51	1.08	1.16	-1.09	0.16 ± 1.14	-0.99	0.07	-0.71	-0.94	0.79
BcaccTSDC17_04503	-1.25	0.36	0.1	0.25	0.63	0.02 ± 0.73	0.43	0.19	-0.04	0.44	0.57	0.32 ± 0.24	0.6	-1.66	-0.3	0.5	-0.02	-0.18 ± 0.91	-0.25	0.33	0.07	1.12	-0.39	0.18 ± 0.6	1	0.72	1.06	1.03	0.66	0.89 ± 0.19	0.77	-0.93	0.82	0.49	0.71	0.91	0.73 ± 0.18	1.19	0.83	0.79	0.41	0.93	0.8	0.73 ± 0.23	0.89	1.41	0.84	1.1	1.14
BcaccTSDC17_04504	0.4	1.14	0.7	0.59	0.8	0.73 ± 0.27	1.06	0.67	0.92	0.69	0.73	0.81 ± 0.17	0.8	-0.31	0.89	0.41	0.68	0.49 ± 0.48	0.7	1.14	0.59	1.27	1.39	1.02 ± 0.35	1.5	1.23	1.61	1.31	1.53	1.44 ± 0.16	1.43	0.97	0.76	1.15	1.01	1.43	1.09 ± 0.28	1.46	1.44	1.22	1.66	1.59	1.4	1.47 ± 0.2	1.61	1.77	1.63	1.7	1.54
BcaccTSDC17_04505	-0.47	-0.36	0.41	-0.96	-0.05	-0.28 ± 0.51	1.72	-1.15	0.68	0.26	-1.02	0.1 ± 1.2	-0.77	-0.98	-0.78	-1.17	-0.79	-0.9 ± 0.18	-0.56	-0.71	-0.65	-0.65	-1.09	-0.73 ± 0.21	-0.07	-0.53	-0.04	-0.13	0.32	-0.09 ± 0.3	-1.07	-0.76	0.28	0.1	0.1	-1.12	-0.16 ± 0.65	1.49	0.27	0.77	0.32	0.58	-0.32	0.34 ± 0.48	0.43	0.24	-0.2	0.27	0.68
BcaccTSDC17_04506	0.03	-1.16	0.98	-0.97	-1.3	-0.48 ± 0.97	-0.79	-0.58	-0.99	-0.38	-1.16	-0.78 ± 0.31	-0.63	-0.84	-0.48	-0.86	-1.07	-0.78 ± 0.23	-0.37	-1.06	-0.65	-1.09	-1.2	-0.88 ± 0.35	-1.04	-0.83	-1.03	0.57	0.16	-0.43 ± 0.75	-0.54	-0.12	-0.37	-0.05	-0.63	-0.38	-0.36 ± 0.24	-0.52	-0.26	-0.88	0.15	-0.86	-0.63	-0.56 ± 0.48	-0.15	-0.43	-0.22	-0.73	0.99
BcaccTSDC17_04507	-0.89	-0.22	-0.71	-1.12	0.81	-0.43 ± 0.77	-0.77	-0.96	-0.96	-0.49	-0.76	-0.79 ± 0.19	-0.86	-1.16	-1.04	-0.9	-0.98	-0.99 ± 0.12	-0.64	-0.64	-1.35	-0.47	-0.93	-0.81 ± 0.35	0.38	0.76	0.55	-0.47	0.03	0.25 ± 0.48	-0.5	-0.35	-0.58	0.2	1.31	-0.06	0.22 ± 0.8	0.69	-0.8	-0.75	-0.87	-1	-1.47	-1.02 ± 0.31	0.94	-0.33	-0.85	-1.3	1.12
BcaccTSDC17_04510	-	-	-	-	-	-	-	-	-	-	-	-	-	-	-	-	-	-	-	-	-	-	-	-	-0.73	-0.6	-0.79	-1.26	-1.3	-0.94 ± 0.32	-1.22	-1.19	0.91	-1.16	-0.89	-0.25	-0.35 ± 0.92	-0.86	-0.86	-0.73	-1.18	-0.48	-0.84	-0.81 ± 0.29	-0.42	-0.87	-0.82	-0.93	-1.23
BcaccTSDC17_04519	-0.38	-0.49	-0.19	0.01	-1.26	-0.46 ± 0.49	-0.51	0	-0.51	-0.25	0.1	-0.24 ± 0.28	-0.46	-0.35	-0.26	-0.7	-0.1	-0.37 ± 0.23	-0.36	-0.01	0.41	-0.18	-0.6	-0.15 ± 0.38	0.32	0.43	-1.65	1.71	0.07	0.18 ± 1.2	-1.23	0.27	-0.81	-0.47	-0.36	0.21	-0.36 ± 0.42	-0.48	0.06	0	0.15	0.13	-0.39	-0.03 ± 0.25	0.03	-0.14	0.15	0.26	0.39
BcaccTSDC17_04522	-	-	-	-	-	-	-	-	-	-	-	-	-	-	-	-	-	-	-	-	-	-	-	-	-0.22	0.45	-0.86	-0.38	0.55	-0.09 ± 0.59	-0.76	-0.26	-1.06	-0.49	-0.48	-1.13	-0.79 ± 0.35	-0.7	-0.87	-0.02	-0.05	-0.11	-0.6	-0.19 ± 0.27	-0.34	-0.75	1.12	-0.67	-0.56
BcaccTSDC17_04551	-	-	-	-	-	-	-	-	-	-	-	-	-	-	-	-	-	-	-	-	-	-	-	-	-0.91	0.34	0.19	0.86	0.55	0.2 ± 0.67	-0.62	-0.56	-1.03	-0.43	-0.45	-0.46	-0.59 ± 0.29	-0.72	-0.99	-0.76	-1.14	-0.12	-0.81	-0.7 ± 0.43	0.06	-0.49	-0.56	-0.91	-0.49
BcaccTSDC17_04552	-	-	-	-	-	-	-	-	-	-	-	-	-	-	-	-	-	-	-	-	-	-	-	-	-1.27	-1.26	-0.64	0.34	0.1	-0.55 ± 0.75	0.22	-0.72	0.42	0.48	-0.55	0.07	0.11 ± 0.48	0.21	0.55	0.82	0.53	0.29	0.04	0.42 ± 0.34	-0.02	0.25	0.23	-0.03	0.74
BcaccTSDC17_04566	-	-	-	-	-	-	-	-	-	-	-	-	-	-	-	-	-	-	-	-	-	-	-	-	-0.91	-0.21	0.72	-0.91	0.87	-0.09 ± 0.86	-0.87	-0.33	-0.88	-0.93	-0.87	-0.39	-0.77 ± 0.25	-0.77	-1.45	-0.65	-1.32	-0.52	-0.5	-0.75 ± 0.39	-1	-0.69	-0.78	-0.61	-1.07
BcaccTSDC17_04620	1.01	0.74	0.71	-1.63	-1.19	-0.07 ± 1.24	-2.03	-0.94	-0.92	0.07	-0.17	-0.8 ± 0.82	-0.72	0.72	1.12	0.65	0.96	0.55 ± 0.73	1.55	0.98	-0.44	-0.17	-0.16	0.35 ± 0.87	-0.98	-1.06	-1.57	-0.55	-0.21	-0.87 ± 0.52	-0.88	-0.4	0.14	-0.42	1.32	1.14	0.55 ± 0.83	1.52	0.06	0.94	0.01	-1.1	0.48	0.08 ± 0.87	0.65	0.38	-1.47	0.43	0.76
BcaccTSDC17_04621	-	-	-	-	-	-	-	-	-	-	-	-	-	-	-	-	-	-	-	-	-	-	-	-	-0.76	0.4	0.44	1.07	-0.77	0.08 ± 0.81	-0.41	0.03	-0.74	-0.85	-0.8	-0.75	-0.79 ± 0.05	-0.93	0.52	-0.16	-0.58	-1.01	-0.68	-0.61 ± 0.35	-0.96	-0.58	-0.6	-0.63	-0.81
BcaccTSDC17_04622	2.43	2.29	1.98	1.93	1.88	2.1 ± 0.24	1.66	1.9	2.03	1.72	2.25	1.91 ± 0.24	2	2.53	2.37	2.09	2.25	2.25 ± 0.21	2.79	2.51	1.85	1.83	1.91	2.18 ± 0.44	2.19	2.38	2.16	2.49	2.51	2.35 ± 0.16	2.44	2.17	2.13	2.25	2.44	2.31	2.28 ± 0.13	2.43	2.22	2.67	2.52	2.37	2.65	2.55 ± 0.14	2.68	2.61	2.62	2.57	2.04
BcaccTSDC17_04623	1.74	1.29	1.1	1.42	0.82	1.27 ± 0.34	1.41	1.35	1.57	1.27	1.24	1.37 ± 0.13	1.57	1.72	1.61	1.27	1.31	1.49 ± 0.2	2.23	1.57	1.84	1.65	1.97	1.85 ± 0.26	1.45	1.32	1.81	1.63	1.27	1.49 ± 0.22	1.47	1.63	0.94	1.34	1.78	1.49	1.39 ± 0.35	1.69	1.16	1.83	1.58	1.55	1.65	1.65 ± 0.13	1.66	1.55	1.55	1.89	1.35
BcaccTSDC17_04624	2.88	2.86	2.79	2.99	2.87	2.88 ± 0.07	2.7	2.71	2.81	2.96	2.78	2.79 ± 0.11	3.16	3.09	3.15	3.16	2.89	3.09 ± 0.11	2.92	3.13	3.01	2.95	2.65	2.93 ± 0.18	3.15	3.04	3.13	3	3.03	3.07 ± 0.07	2.43	2.54	2.44	2.68	3.09	3.02	2.81 ± 0.31	2.87	2.69	3.11	2.88	3.04	3.04	3.02 ± 0.1	3.29	2.89	2.76	2.92	2.4
BcaccTSDC17_04625	2.49	2.57	2.61	2.72	2.54	2.59 ± 0.09	2.46	2.53	2.54	2.49	2.54	2.51 ± 0.04	2.64	2.62	2.58	2.7	2.28	2.56 ± 0.17	2.31	1.92	2.61	2.32	2.53	2.34 ± 0.27	2.85	2.68	2.92	2.69	2.82	2.79 ± 0.1	2.25	2.38	2.39	2.51	2.49	2.41	2.45 ± 0.06	2.51	2.52	2.79	2.78	2.82	2.9	2.82 ± 0.05	2.95	2.29	2.04	2.66	2.45
BcaccTSDC17_04626	-0.52	-1.12	1.22	-0.75	-1.39	-0.51 ± 1.03	-0.88	-1.62	-0.7	-0.78	-1.15	-1.02 ± 0.37	-1.23	-0.5	-0.83	-1.35	-1.13	-1.01 ± 0.34	-0.92	-0.85	-0.93	-1.14	-0.7	-0.91 ± 0.16	-0.79	-0.8	-0.58	-0.38	0.16	-0.48 ± 0.4	-0.9	-0.89	-0.33	-0.62	-0.26	-0.77	-0.5 ± 0.24	-0.12	-1.22	-0.55	-0.78	-0.83	-1.03	-0.8 ± 0.2	-1.06	-1.06	-0.9	-0.36	-1.04
BcaccTSDC17_04627	-	-	-	-	-	-	-	-	-	-	-	-	-	-	-	-	-	-	-	-	-	-	-	-	1.2	-1.03	-1.22	-0.71	-0.83	-0.52 ± 0.98	-0.89	-0.36	-1.29	-0.64	-0.7	-0.55	-0.8 ± 0.33	-0.6	-0.74	-1	0.01	-0.27	-0.85	-0.53 ± 0.47	1.08	-0.5	0.93	-0.43	-0.81
BcaccTSDC17_04628	-	-	-	-	-	-	-	-	-	-	-	-	-	-	-	-	-	-	-	-	-	-	-	-	-1.06	-0.6	-0.63	-1.17	-1.01	-0.89 ± 0.26	-0.83	-0.64	-0.85	-0.71	-0.39	-1.01	-0.74 ± 0.27	-0.55	-0.96	-1.36	-1.03	-0.63	-0.55	-0.89 ± 0.38	0.55	-0.08	-0.8	-0.93	-0.92
BcaccTSDC17_04629	-1.14	-0.13	0.51	0.12	0.15	-0.1 ± 0.62	-0.22	-0.91	0.4	-0.97	-0.1	-0.36 ± 0.58	-0.57	-0.39	0	0	-0.31	-0.25 ± 0.25	-0.53	-0.69	-0.94	-0.89	-0.56	-0.72 ± 0.18	0.2	-1.58	-0.01	0.42	0.17	-0.16 ± 0.81	-0.9	-0.32	0.41	-0.05	-0.9	0.49	-0.01 ± 0.64	-0.58	0.8	0.1	0.35	-0.22	-0.22	0 ± 0.28	0.02	0.43	-0.87	-0.32	0.37
BcaccTSDC17_04630	-0.72	0.02	-1.17	0.17	0.2	-0.3 ± 0.61	0.2	-0.57	-0.79	-0.75	-0.89	-0.56 ± 0.44	-0.78	-0.48	-0.13	-0.52	-0.75	-0.53 ± 0.26	-0.57	-0.96	-0.93	-0.13	-0.52	-0.62 ± 0.34	-0.81	-1.03	-0.26	-0.86	0.5	-0.49 ± 0.63	-0.32	-1.03	-1.06	-0.88	-0.3	-1.08	-0.83 ± 0.36	-0.36	0.1	-0.76	-0.86	-1.12	-0.46	-0.8 ± 0.27	-1.38	-0.63	-1.12	-0.43	-0.79
BcaccTSDC17_04631	0.33	0.19	0.23	0.2	0.51	0.29 ± 0.13	0.48	-0.99	-0.8	0.36	0.36	-0.12 ± 0.71	0.45	0.47	-1.44	0.14	0.5	0.02 ± 0.83	-0.47	0.67	1.04	-0.46	0.78	0.31 ± 0.72	0.7	0.53	0.11	-0.78	-0.03	0.11 ± 0.58	-0.84	-0.65	0.73	-0.14	0.86	-0.18	0.32 ± 0.56	-0.63	-1	-0.07	0.85	-0.75	0.35	0.09 ± 0.68	-1.15	-0.77	-0.74	-0.76	0.32
BcaccTSDC17_04634	-0.72	-1.11	0.18	-0.55	-0.25	-0.49 ± 0.49	-0.74	-1.57	-0.37	-1.44	-0.65	-0.95 ± 0.52	-0.82	-0.36	-1.33	-1.05	-0.68	-0.85 ± 0.36	-0.67	-1.13	-0.59	-0.65	-0.37	-0.68 ± 0.28	-	-	-	-	-	-	-	-	-	-	-	-	-	-	-	-	-	-	-	-	-	-	-	-	-
BcaccTSDC17_04639	0.22	-0.37	-1.13	-1.39	-1.33	-0.8 ± 0.7	0.03	-0.62	-0.33	-1.26	-0.32	-0.5 ± 0.48	-0.59	0.96	1.03	-0.79	-0.07	0.11 ± 0.85	0.03	1.15	-0.77	-0.87	-0.69	-0.23 ± 0.85	-	-	-	-	-	-	-	-	-	-	-	-	-	-	-	-	-	-	-	-	-	-	-	-	-
BcaccTSDC17_04726	-0.93	-0.12	-0.54	-0.61	-0.68	-0.58 ± 0.29	-0.76	-0.78	-0.74	-1.23	-0.17	-0.73 ± 0.37	-0.87	-0.83	-0.84	-0.83	-0.76	-0.83 ± 0.04	-0.88	-0.75	-0.57	-1.07	-1.13	-0.88 ± 0.23	-0.76	-0.75	0.65	-1.25	-0.91	-0.6 ± 0.73	-0.88	-1.12	-1.08	-0.78	-0.84	-1.09	-0.95 ± 0.16	-0.79	-0.99	-0.54	-0.66	-1	-0.92	-0.78 ± 0.22	-1	-0.52	-0.63	-0.1	-0.91
BcaccTSDC17_04731	-	-	-	-	-	-	-	-	-	-	-	-	-	-	-	-	-	-	-	-	-	-	-	-	-0.84	-0.43	0.55	-0.64	-0.9	-0.45 ± 0.59	-0.49	-0.27	-0.73	-0.98	-0.81	-0.68	-0.8 ± 0.13	-0.44	-0.41	-0.64	-0.97	-0.52	-0.81	-0.74 ± 0.2	0.44	0.54	-0.55	-0.79	-0.59
[truncated: 19 more columns]

## Sheet: Table 3b
Supplementary File 3: Meta-proteomic analysis of the effects of pea fiber, PFABN and SBABN supplementation of the HiSF-LoFV diet on gene expression in members of the defined community (related to Fig. 2).
(b) Bacteroides cellulosilyticus WH2 (cyclic loess normalized protein abundance Z-scores)
	Experiment 1																								Experiment 2
	HiSF-LoFV						HiSF-LoFV + pea fiber						HiSF-LoFV + PFABN						HiSF-LoFV + SBABN						HiSF-LoFV						HiSF-LoFV + pea fiber							HiSF-LoFV + PFABN							HiSF-LoFV + SBABN
locus_tag	2.0	3.2	10.0	17.0	18.0	mean ± SD	1.2	4.0	6.2	12.0	15.0	mean ± SD	1.0	4.2	6.0	7.2	9.2	mean ± SD	2.2	3.0	5.0	8.0	13.0	mean ± SD	1.1	3.1	4.1	5.1	11.0	mean ± SD	2.1	6.0	8.0	11.12	15.0	17.0	mean ± SD	2.5	7.0	9.0	10.0	13.0	13.5	mean ± SD	1.5	3.5	5.5	14.0	16.0
BcellWH2_00001	-0.96	-0.53	-0.88	-1.2	-1.07	-0.93 ± 0.25	-0.92	-0.86	-1.09	-0.7	-1.42	-1 ± 0.28	-1.18	0	-1.03	-0.78	-0.79	-0.75 ± 0.45	-1.27	-0.62	-0.84	-1.05	-0.57	-0.87 ± 0.29	-	-	-	-	-	-	-	-	-	-	-	-	-	-	-	-	-	-	-	-	-	-	-	-	-
BcellWH2_00015	-1.16	-0.85	-0.81	-0.65	-0.97	-0.89 ± 0.19	-1.13	-1.03	-0.67	-0.76	-1.36	-0.99 ± 0.28	-0.8	0.31	-0.87	-1.01	-1.11	-0.69 ± 0.57	-0.73	-1.01	-1.62	-1.12	-0.76	-1.05 ± 0.36	-	-	-	-	-	-	-	-	-	-	-	-	-	-	-	-	-	-	-	-	-	-	-	-	-
BcellWH2_00017	-0.59	-1.43	-0.89	-1.07	-0.81	-0.96 ± 0.31	-1.38	-1.29	-0.9	-1.39	-1.63	-1.32 ± 0.27	-1.22	2.02	1.99	0.71	0.74	0.85 ± 1.32	-0.7	-0.68	-0.42	-1.2	-0.35	-0.67 ± 0.34	-0.91	-0.56	-0.82	-0.79	-0.83	-0.78 ± 0.13	-0.91	-0.83	-1.03	-0.98	-0.9	-0.69	-0.9 ± 0.15	-1.25	-0.97	-0.52	-0.84	-0.91	-0.54	-0.7 ± 0.2	-0.82	-0.75	-0.69	-0.58	-1.06
BcellWH2_00021	-	-	-	-	-	-	-	-	-	-	-	-	-	-	-	-	-	-	-	-	-	-	-	-	-0.85	-1.08	-0.84	-1.06	-0.59	-0.88 ± 0.2	-1.25	-0.89	-0.8	-0.98	-0.57	-1.08	-0.86 ± 0.23	-0.75	-0.66	-1.48	-1.19	-0.57	-0.28	-0.88 ± 0.55	-0.97	-0.99	-1.1	-0.71	-0.46
BcellWH2_00022	-0.53	-0.97	-0.86	-0.98	-1.02	-0.87 ± 0.2	-1.71	-1.31	-1.48	-1.52	-1.53	-1.51 ± 0.14	-0.66	2.39	1.61	0.99	-0.86	0.69 ± 1.42	0.49	0.11	-0.72	-0.46	-0.98	-0.31 ± 0.6	-1.11	-0.83	-0.35	-1.24	-0.48	-0.8 ± 0.39	-1.02	-0.94	-1.54	-1.24	-0.72	-0.7	-1.05 ± 0.41	-0.53	-0.63	-1.2	-0.41	-0.6	-0.64	-0.71 ± 0.34	-0.94	-1.1	-0.8	-0.92	-0.96
BcellWH2_00031	-0.93	-0.6	-0.59	-1.03	-0.82	-0.79 ± 0.2	-1.35	-1.37	-0.47	-1.09	-1.25	-1.11 ± 0.37	-0.72	1.77	-1.04	-0.65	-1.21	-0.37 ± 1.22	-0.54	-1.1	-0.91	-0.54	-0.66	-0.75 ± 0.25	-0.83	-0.75	-0.7	-1.11	-1.09	-0.9 ± 0.19	-0.64	-0.44	-1.06	-0.77	-0.71	-0.73	-0.82 ± 0.16	-1.14	-1.11	-0.85	-1.11	-0.5	-0.9	-0.84 ± 0.25	-1.08	-1.04	-0.46	-0.76	-0.7
BcellWH2_00032	-	-	-	-	-	-	-	-	-	-	-	-	-	-	-	-	-	-	-	-	-	-	-	-	-1.39	-1.06	-1	-0.73	-0.75	-0.99 ± 0.27	-0.68	-1.07	-0.95	-0.9	-0.9	-0.47	-0.8 ± 0.22	-0.9	-0.8	-1.11	-0.84	-0.84	-0.73	-0.88 ± 0.16	-1.03	-0.74	-1.07	-0.62	-0.23
BcellWH2_00042	-0.09	-1.93	0.22	0.32	0.06	-0.28 ± 0.93	-0.42	-1.17	0.16	0	0.08	-0.27 ± 0.55	-0.45	0.12	0.4	0.2	0.13	0.08 ± 0.32	-0.28	0.47	1.03	0.45	-1	0.14 ± 0.79	-0.19	0.23	-0.57	-0.17	-1.11	-0.36 ± 0.5	-0.12	0.48	0.13	-0.5	-0.07	0.18	-0.06 ± 0.31	-0.55	-0.35	-0.59	0.03	0.01	-0.73	-0.32 ± 0.4	-0.75	-0.38	-1	-0.02	-1.02
BcellWH2_00049	1.4	1.67	1.78	1.49	1.78	1.62 ± 0.17	1.11	1.61	1.49	1.4	1.3	1.38 ± 0.19	1.63	1.5	1.6	0.34	-1.43	0.73 ± 1.32	1.8	-0.4	2.18	1.47	-0.39	0.93 ± 1.24	1.02	1.04	0.76	0.43	0.97	0.84 ± 0.26	0.55	2.01	0.75	0.8	0.89	0.89	0.83 ± 0.07	-0.65	0.46	0.84	0.58	0.45	0.63	0.63 ± 0.16	0.83	0	0.92	0.95	0.88
BcellWH2_00054	0.03	0.16	-1.06	0.23	0.14	-0.1 ± 0.54	-0.35	-0.21	-0.2	-0.63	-0.73	-0.42 ± 0.24	-0.77	-0.2	-0.96	-0.4	0.1	-0.45 ± 0.43	-0.53	0.09	-0.6	-0.73	-0.64	-0.48 ± 0.33	-0.49	0.59	1.01	-0.22	-1.44	-0.11 ± 0.96	-0.93	0.02	-1.09	-0.29	0.93	-1.21	-0.41 ± 0.99	-0.73	-1.03	-0.1	-0.42	-0.73	-0.71	-0.49 ± 0.3	-0.84	-0.96	-0.68	-0.9	-1.08
BcellWH2_00056	-	-	-	-	-	-	-	-	-	-	-	-	-	-	-	-	-	-	-	-	-	-	-	-	-0.95	-0.83	-0.62	-1.7	-1.07	-1.04 ± 0.41	-1.49	0.08	-0.09	-1.28	-0.9	-0.39	-0.66 ± 0.53	-0.92	-0.94	-0.76	0.27	-0.89	-1.05	-0.61 ± 0.6	-1.15	-1.39	-0.93	-0.45	-0.34
BcellWH2_00058	-	-	-	-	-	-	-	-	-	-	-	-	-	-	-	-	-	-	-	-	-	-	-	-	-0.74	-0.31	-0.82	-1.02	-0.63	-0.7 ± 0.26	-1.27	-0.71	-0.8	-0.5	-0.97	-1.06	-0.83 ± 0.25	-1.1	-0.62	-0.26	-0.56	-0.46	-0.7	-0.49 ± 0.19	-0.71	-0.93	-0.43	-0.46	-1.1
BcellWH2_00060	-	-	-	-	-	-	-	-	-	-	-	-	-	-	-	-	-	-	-	-	-	-	-	-	-0.62	-0.65	-0.13	-0.7	-0.88	-0.59 ± 0.28	-0.79	0.67	-0.3	-1.27	-1	-1.11	-0.92 ± 0.43	-0.71	-1	-0.7	-1.4	0.71	-0.97	-0.59 ± 0.92	-0.22	-1.04	-1.03	-0.63	-0.78
BcellWH2_00062	-	-	-	-	-	-	-	-	-	-	-	-	-	-	-	-	-	-	-	-	-	-	-	-	-0.85	-0.94	-0.91	-0.91	-0.78	-0.88 ± 0.07	-1	-0.81	-1.08	-1.08	-0.77	-1.24	-1.05 ± 0.2	-0.48	-0.71	-1	-0.87	-0.66	-0.69	-0.81 ± 0.16	-0.48	-0.72	-0.14	-0.9	-0.57
BcellWH2_00063	-0.46	0.24	-0.92	0.11	0.24	-0.16 ± 0.51	-0.85	-0.18	-1.67	-0.59	-0.59	-0.77 ± 0.56	0.3	-0.1	-0.68	-0.24	-0.22	-0.19 ± 0.35	-0.16	-1.14	-0.69	0.76	0.01	-0.24 ± 0.72	0.64	0.86	-0.03	-0.41	-1.67	-0.12 ± 1	-0.53	-0.35	-1.24	-0.66	-1.31	-0.96	-1.04 ± 0.3	-0.2	-0.2	1.01	-0.27	-0.33	-0.74	-0.08 ± 0.76	0.35	0.18	-0.01	-0.32	-0.42
BcellWH2_00064	-	-	-	-	-	-	-	-	-	-	-	-	-	-	-	-	-	-	-	-	-	-	-	-	-1.21	-1.25	-0.68	-0.93	-0.46	-0.91 ± 0.34	-0.2	-1.13	-0.75	-0.79	-0.8	-0.99	-0.83 ± 0.11	-1.49	-0.94	-0.77	-0.73	-0.87	-0.88	-0.81 ± 0.07	-1.33	-0.7	-0.68	-0.33	-1.14
BcellWH2_00070	-0.09	-0.53	-0.23	-1.23	-1.27	-0.67 ± 0.55	0.24	-1.06	-0.8	0.21	-0.1	-0.3 ± 0.59	0.16	0.93	0.79	-1.27	-1.06	-0.09 ± 1.02	-0.63	0.28	0.83	-0.97	0.41	-0.02 ± 0.75	-0.36	0.76	0.47	0.36	0.55	0.36 ± 0.43	0.98	0.86	0.52	0.86	0.82	0.9	0.77 ± 0.17	-0.61	-0.29	0.73	0.07	0.24	0.46	0.37 ± 0.28	0.92	0.38	0.91	0.15	0.75
BcellWH2_00077	-0.28	-0.16	-0.84	-1.14	-0.23	-0.53 ± 0.43	-0.03	-1.51	-1.45	0.02	-0.32	-0.66 ± 0.76	-0.82	-1.14	-0.91	0.37	-0.43	-0.58 ± 0.59	-0.48	-0.44	-0.82	0.56	0.26	-0.19 ± 0.57	-1.24	-0.49	-0.92	-1.19	-1.05	-0.98 ± 0.3	-0.66	-0.68	0.26	-1.46	-0.86	-1.24	-0.82 ± 0.76	-1.06	-0.8	-0.96	-0.7	-0.62	-0.69	-0.74 ± 0.15	-0.82	-0.75	-1.18	-0.67	-1.01
BcellWH2_00079	0.99	-0.14	0.08	0.05	-0.55	0.09 ± 0.57	-0.04	-0.36	-0.03	-0.04	0.07	-0.08 ± 0.16	-0.14	0	0.39	-0.18	0.15	0.05 ± 0.23	-0.47	-0.19	-0.45	0.44	0.54	-0.03 ± 0.49	1.16	0.96	0.97	0.75	-1.29	0.51 ± 1.02	-1.57	0.15	0.19	-2.27	-0.25	-0.54	-0.72 ± 1.08	1.27	-1.37	0.69	-0.31	0.1	0.51	0.25 ± 0.45	-0.84	-1.35	0.16	-0.99	-0.96
BcellWH2_00080	1.09	0.34	-0.08	0.48	0.4	0.45 ± 0.42	-0.01	-0.46	0.21	0.45	0.06	0.05 ± 0.34	0.5	-0.3	-0.04	-0.21	-0.71	-0.15 ± 0.44	-0.23	-1.47	-0.45	-0.07	0.06	-0.43 ± 0.61	0.79	0.84	0.77	1.15	0.61	0.83 ± 0.2	0.4	0.5	0.45	0.16	0.52	-0.16	0.24 ± 0.31	0.77	0.52	0.77	0.43	0.6	0.35	0.54 ± 0.19	-0.17	0.36	0.28	0.29	0.5
BcellWH2_00087	1.25	-1.43	0.71	0.85	-0.15	0.25 ± 1.07	-1.83	-0.06	0.04	-0.27	-0.43	-0.51 ± 0.76	-1.42	-0.68	-0.65	-1.17	-0.88	-0.96 ± 0.33	-0.26	-0.81	-0.61	0.5	0.76	-0.08 ± 0.69	0.24	0.73	0.24	0.33	0.32	0.37 ± 0.21	0.03	-0.16	0.02	-0.19	-0.14	0.01	-0.07 ± 0.1	-0.65	-0.06	0.3	-0.23	-0.05	0.2	0.05 ± 0.24	0.53	0.16	0.16	0.06	0.33
BcellWH2_00095	-	-	-	-	-	-	-	-	-	-	-	-	-	-	-	-	-	-	-	-	-	-	-	-	-0.42	-0.9	-0.42	-0.59	-0.97	-0.66 ± 0.26	-0.36	0.51	-0.39	-0.02	-1.54	0.03	-0.48 ± 0.73	-0.38	0.19	0.07	0.13	-0.09	0.17	0.07 ± 0.11	-0.15	-1.05	-1.68	-0.41	-0.57
BcellWH2_00098	-0.59	-1.03	-0.47	-0.97	-0.76	-0.77 ± 0.24	-1.42	-0.82	-0.93	0.32	-1.49	-0.87 ± 0.73	-0.54	-0.93	-1.01	-1.1	-0.86	-0.89 ± 0.21	-1.02	-0.55	-0.99	-1.17	-1.13	-0.97 ± 0.25	-	-	-	-	-	-	-	-	-	-	-	-	-	-	-	-	-	-	-	-	-	-	-	-	-
BcellWH2_00101	-0.8	0.64	0.79	0.59	0.61	0.37 ± 0.66	0.11	0.43	0.43	0.11	0.13	0.24 ± 0.17	0.63	0.56	0.17	-0.11	-0.4	0.17 ± 0.44	1.5	0.38	1	0.17	0.51	0.71 ± 0.54	0.84	1.27	1.25	0.86	0.67	0.98 ± 0.27	0.72	0.75	0.55	0.67	1	0.84	0.77 ± 0.19	0.92	0.67	0.63	0.68	0.58	0.82	0.68 ± 0.1	0.58	0.68	0.79	0.54	0.48
BcellWH2_00154	-	-	-	-	-	-	-	-	-	-	-	-	-	-	-	-	-	-	-	-	-	-	-	-	0.33	0.39	0.38	0.61	-1.12	0.12 ± 0.7	-1.32	-0.28	-0.52	-0.49	-0.09	-0.06	-0.29 ± 0.25	0.38	0.14	0.44	-0.48	-1.38	-0.02	-0.36 ± 0.78	-1	-0.77	0.02	-1.33	0.17
BcellWH2_00259	-0.46	-1.5	0.46	-0.95	-0.83	-0.66 ± 0.72	-0.69	-0.39	0.15	-1.1	-0.65	-0.54 ± 0.46	-0.95	-0.73	0.66	0.43	-0.14	-0.15 ± 0.7	-0.58	-0.84	-0.71	-0.53	-0.52	-0.63 ± 0.14	-0.71	-0.63	-0.48	-1.25	-0.77	-0.77 ± 0.29	-1.24	-0.05	-1.15	-0.27	-0.37	-0.83	-0.65 ± 0.41	-0.7	0.24	-0.81	-1.01	-1.21	-0.99	-1 ± 0.16	-0.82	-0.76	-0.89	-0.68	-0.67
BcellWH2_00265	0.61	-0.04	0.61	0.26	0.13	0.32 ± 0.29	0.25	0.32	0.02	0.33	0.27	0.24 ± 0.13	0.2	-0.38	0.42	0.11	0.43	0.16 ± 0.33	-0.35	0.35	-0.38	0.67	0.18	0.09 ± 0.46	1.28	0.87	0.95	1.16	0.75	1 ± 0.22	0.6	0.44	0.64	0.74	0.76	0.74	0.72 ± 0.05	1.28	-0.53	0.42	-0.37	0.69	0.94	0.42 ± 0.57	0.98	0.82	0.71	0.71	0.85
BcellWH2_00293	-	-	-	-	-	-	-	-	-	-	-	-	-	-	-	-	-	-	-	-	-	-	-	-	-0.82	-0.28	-0.76	-0.78	-0.78	-0.68 ± 0.23	-0.45	-0.95	-1.4	-1.35	-0.85	-0.95	-1.14 ± 0.27	-1.02	-0.83	-0.84	-0.98	-0.17	-0.73	-0.68 ± 0.35	-0.73	-1.01	0.3	0.58	-0.94
BcellWH2_00312	-	-	-	-	-	-	-	-	-	-	-	-	-	-	-	-	-	-	-	-	-	-	-	-	-0.54	-0.63	-0.23	-0.1	-0.81	-0.46 ± 0.29	-0.2	-0.78	-1.44	-1.45	-0.89	-0.46	-1.06 ± 0.48	-0.74	-1.17	-1.39	-1.02	-1.08	-0.6	-1.02 ± 0.33	-0.7	-0.02	-0.28	-0.07	-0.52
BcellWH2_00315	0.99	-0.03	-1.05	-0.6	-0.7	-0.28 ± 0.8	0.14	-0.87	-1.35	-1.62	-0.63	-0.86 ± 0.68	-0.9	-0.73	-1.38	-1.28	-0.59	-0.98 ± 0.34	-0.72	-0.81	-0.15	-0.74	-1.2	-0.72 ± 0.37	-0.87	0.26	0.47	-0.5	-0.66	-0.26 ± 0.59	-0.43	-0.95	-1.42	-1.17	-1.01	-1.12	-1.18 ± 0.17	-0.88	-0.96	-0.69	-1.13	-0.35	-0.49	-0.66 ± 0.34	-1.15	-0.87	-1.33	-0.8	-0.36
BcellWH2_00316	-0.68	-0.02	-1	-0.31	-0.13	-0.43 ± 0.41	-1.06	-1.54	-0.4	-0.52	-0.52	-0.81 ± 0.48	-0.09	-0.62	-1.13	-0.25	-0.35	-0.49 ± 0.41	-0.43	-0.79	-0.85	0	-0.61	-0.53 ± 0.34	-0.46	-0.73	-0.72	-0.98	-0.85	-0.75 ± 0.19	-1.23	-0.26	-0.79	-0.74	-0.85	-0.69	-0.77 ± 0.06	-0.56	-0.64	-0.7	-0.72	-0.95	-0.86	-0.81 ± 0.12	-0.5	-0.59	-0.43	-0.88	-1.2
BcellWH2_00324	-1.5	0.14	-1.08	-0.2	-0.76	-0.68 ± 0.66	0.02	-0.12	-0.13	-0.25	-0.45	-0.19 ± 0.18	-0.77	-0.9	-1.16	-1.15	-0.59	-0.91 ± 0.25	-1.16	-0.66	-1.08	-0.84	-0.68	-0.88 ± 0.23	-0.53	0.51	-0.59	0.31	-0.98	-0.26 ± 0.64	-0.99	-0.14	-1.49	-0.31	-0.1	-1.15	-0.76 ± 0.67	-0.49	-0.83	-0.24	-1.19	-0.47	-0.17	-0.51 ± 0.47	0.05	-0.56	0.16	-0.11	-1.14
BcellWH2_00343	-	-	-	-	-	-	-	-	-	-	-	-	-	-	-	-	-	-	-	-	-	-	-	-	-1.17	-0.94	-0.92	-0.29	-0.06	-0.68 ± 0.47	0.13	-0.95	-0.33	-0.4	0.27	-1	-0.36 ± 0.52	-0.67	0.32	-0.79	-0.81	-1.26	-1.34	-1.05 ± 0.29	-0.99	-0.96	0.07	-0.22	-0.83
BcellWH2_00347	-	-	-	-	-	-	-	-	-	-	-	-	-	-	-	-	-	-	-	-	-	-	-	-	-0.25	-0.69	-0.89	-0.35	0.15	-0.4 ± 0.4	-1.02	-0.86	-1.21	-0.2	-0.51	-0.55	-0.62 ± 0.42	-0.3	0.32	-0.57	-1.06	-0.98	-0.81	-0.85 ± 0.22	-0.53	-0.98	-0.12	-1	-0.56
BcellWH2_00348	-0.81	-0.44	-0.76	-0.38	-0.57	-0.59 ± 0.19	-0.27	-0.92	-0.2	0.38	-0.45	-0.29 ± 0.47	-1.07	-1.6	-0.15	-0.36	0.17	-0.6 ± 0.72	-0.48	-0.76	-0.3	-0.29	-0.56	-0.48 ± 0.2	-0.23	-0.73	-0.53	-0.75	-1.65	-0.78 ± 0.53	-1.45	0.07	0.27	-0.22	0.49	0.6	0.29 ± 0.36	-0.03	0.12	-0.2	-0.39	-0.52	0.19	-0.23 ± 0.31	0.36	0.33	-0.02	0.29	-0.72
BcellWH2_00349	-1.33	-1.04	-0.77	-1.02	0.05	-0.82 ± 0.53	0.25	-0.57	-0.03	-0.46	-1.44	-0.45 ± 0.65	-0.23	-0.92	-0.44	-0.8	-1.11	-0.7 ± 0.36	-0.07	-0.38	-0.96	-1	-0.68	-0.62 ± 0.39	0.18	0.05	0.33	-0.43	0.11	0.05 ± 0.29	0.45	-0.33	-0.16	0.03	0.14	0.57	0.15 ± 0.31	-0.62	-0.65	-0.34	-1.87	-0.94	-1.02	-1.04 ± 0.63	0.34	-0.01	-0.5	-0.02	-1.04
BcellWH2_00350	-0.12	0.12	-0.38	0.1	0.42	0.03 ± 0.3	-0.19	0.28	0.4	0.22	0.13	0.17 ± 0.22	0.28	0.3	0.07	0.25	0.37	0.25 ± 0.11	-0.27	0.55	0.31	-1.11	-1.11	-0.33 ± 0.78	-0.64	0.45	-0.84	-0.44	-0.62	-0.42 ± 0.5	0.29	0.72	-0.63	0.42	0.83	0.74	0.34 ± 0.67	-0.57	-1.01	-0.8	-2.26	1.57	0.24	-0.31 ± 1.62	0.74	-0.94	0.39	-0.54	-0.96
BcellWH2_00360	-1.23	-1.44	-0.9	-0.5	-0.45	-0.91 ± 0.44	0.94	-1.23	-0.76	-1.03	-1.64	-0.74 ± 1	0.98	-0.82	-1.06	-0.93	-0.89	-0.54 ± 0.85	-0.84	-1.06	-1.31	-0.2	-0.62	-0.81 ± 0.43	-	-	-	-	-	-	-	-	-	-	-	-	-	-	-	-	-	-	-	-	-	-	-	-	-
BcellWH2_00365	-	-	-	-	-	-	-	-	-	-	-	-	-	-	-	-	-	-	-	-	-	-	-	-	-0.55	-0.37	0.43	0.56	0.17	0.05 ± 0.49	-1.31	-1	-0.44	-0.61	-0.11	-1.06	-0.55 ± 0.4	-0.35	0.29	0.34	0.05	-1.25	-0.66	-0.38 ± 0.71	-0.82	-0.53	-0.16	-0.16	-0.13
BcellWH2_00369	0.18	-1.12	-0.07	-0.12	-0.37	-0.3 ± 0.5	-0.39	0.19	-1.27	-0.38	-0.43	-0.46 ± 0.52	-0.89	-1.14	0.18	-0.99	-0.9	-0.75 ± 0.53	-0.39	-0.79	-0.73	-1.11	-0.91	-0.79 ± 0.26	-	-	-	-	-	-	-	-	-	-	-	-	-	-	-	-	-	-	-	-	-	-	-	-	-
BcellWH2_00370	-0.85	-1.1	1.2	-1	-1.04	-0.56 ± 0.99	-1.43	-1.1	-1.05	0.02	-0.26	-0.76 ± 0.61	-0.45	-0.62	-0.79	-0.92	-0.64	-0.68 ± 0.18	-1.04	-0.88	-1.12	-0.88	-0.94	-0.97 ± 0.1	0.73	0.05	0.45	0.37	0.05	0.33 ± 0.29	-0.35	-0.42	0.78	-0.47	0.2	0.37	0.22 ± 0.52	0.65	-0.04	-0.08	0.78	0.69	-1.2	0.05 ± 0.92	-0.03	-1.25	-0.22	0.91	0.03
BcellWH2_00378	-0.31	0.42	0.02	0.1	0.14	0.07 ± 0.26	0.1	0.34	-0.08	0.03	-0.42	-0.01 ± 0.28	0.21	-0.05	0.21	0.26	0.41	0.21 ± 0.16	0.59	-1.4	0.46	0.49	0.5	0.13 ± 0.86	1.01	0.59	0.64	0.99	0.71	0.79 ± 0.2	0.71	0.39	0.41	-1.85	0.92	0.77	0.06 ± 1.29	1.36	0.76	1.02	0.53	0.56	0.71	0.71 ± 0.22	0.44	0.85	0.96	-0.93	0.83
BcellWH2_00379	0.51	0.76	0.36	0.22	0.02	0.38 ± 0.28	0.52	0.53	0.06	-0.01	0.25	0.27 ± 0.25	0.21	0.03	0.45	0.48	0.45	0.32 ± 0.2	0.72	0.26	-0.21	0.4	0.42	0.32 ± 0.34	1.09	0.87	1.11	1.38	0.98	1.09 ± 0.19	1.25	0.86	1.01	1.06	1	1.12	1.05 ± 0.06	1.29	1.13	1.28	1.08	0.97	1.06	1.1 ± 0.13	1	1.32	1.16	1.17	0.74
BcellWH2_00380	-	-	-	-	-	-	-	-	-	-	-	-	-	-	-	-	-	-	-	-	-	-	-	-	-1.15	-0.64	-0.67	-0.8	-0.31	-0.71 ± 0.3	-1.11	-1.08	-0.28	-0.67	-0.77	-0.62	-0.59 ± 0.21	-0.6	-0.85	-1.02	-0.32	-0.53	-0.47	-0.58 ± 0.3	-0.97	-0.11	-0.29	-0.32	-0.21
BcellWH2_00408	-	-	-	-	-	-	-	-	-	-	-	-	-	-	-	-	-	-	-	-	-	-	-	-	-0.8	-1.11	-1.01	-0.72	-0.68	-0.87 ± 0.19	-0.79	-0.76	-1.22	-0.8	-0.94	-0.22	-0.8 ± 0.42	-0.78	-0.78	-1.07	-0.51	-0.62	-1.14	-0.84 ± 0.32	-0.63	-0.96	-0.96	-0.59	-0.8
BcellWH2_00411	0.48	0.35	0.66	0.52	0.05	0.41 ± 0.23	-0.38	-1.08	-0.73	-0.32	-0.73	-0.65 ± 0.31	-0.99	0.01	0.1	-0.37	-1.45	-0.54 ± 0.67	-0.11	0.52	-0.18	-0.21	-0.06	-0.01 ± 0.3	-0.98	-0.89	-0.91	1.36	-1.24	-0.53 ± 1.06	-0.93	0.53	-1.14	-0.7	-0.28	-0.91	-0.76 ± 0.37	-0.76	-0.86	-0.64	-1	-1.3	-1.08	-1.01 ± 0.27	-0.74	-1.21	-1.11	0.3	-0.62
BcellWH2_00415	-1.1	-1.35	-0.93	-0.62	-0.82	-0.96 ± 0.28	-0.13	-1.01	-0.51	-0.08	-1.16	-0.58 ± 0.5	-0.96	-0.83	-0.7	-0.87	-1.16	-0.9 ± 0.17	-0.63	-0.98	-0.85	-0.82	-0.87	-0.83 ± 0.13	-0.13	-0.8	-0.78	-0.32	-1.07	-0.62 ± 0.38	-1.59	0.16	-0.3	0.35	0.48	-0.49	0.01 ± 0.48	-0.43	-0.3	0	-1.41	-1.11	-0.74	-0.82 ± 0.61	-0.96	-1.02	0.56	-0.33	-1.12
BcellWH2_00416	-0.68	0.14	-1.02	-0.82	0.14	-0.45 ± 0.55	-0.28	-1.76	-0.37	-1.08	-0.35	-0.77 ± 0.64	-0.09	0.19	-0.75	-1.56	0.18	-0.41 ± 0.75	-0.77	-0.12	0.24	-0.57	-0.1	-0.26 ± 0.41	-1.16	-0.76	-0.67	-0.42	-0.69	-0.74 ± 0.26	-0.82	-0.5	-1.45	-0.72	0.57	-0.71	-0.58 ± 0.84	-1	-0.2	-0.8	-0.37	-1	-0.94	-0.78 ± 0.29	-0.1	-0.92	-0.72	0.32	-0.56
BcellWH2_00418	-0.03	-0.48	0.59	-1.1	-0.14	-0.23 ± 0.62	-1.13	-0.37	-0.27	-0.22	-0.13	-0.42 ± 0.41	0.76	0.72	0.28	-0.24	0.44	0.39 ± 0.4	1.64	-0.25	-0.98	-1.03	0.1	-0.1 ± 1.09	-0.96	-0.28	-0.33	0.44	-0.22	-0.27 ± 0.5	0.07	-0.06	-0.22	0.24	0.27	0.35	0.16 ± 0.26	0.79	0.4	0.27	0.19	0.17	0.44	0.27 ± 0.12	0.09	0.27	0.09	0.15	0.72
BcellWH2_00421	-	-	-	-	-	-	-	-	-	-	-	-	-	-	-	-	-	-	-	-	-	-	-	-	-0.63	-0.97	-1.12	-0.33	-0.03	-0.61 ± 0.45	-0.05	-1.05	0.03	-0.2	-0.96	-0.82	-0.49 ± 0.48	-0.69	-0.87	-0.52	0.12	-0.04	0.09	-0.09 ± 0.3	-0.7	-0.83	-1.25	-1.22	-0.58
BcellWH2_00425	-0.55	-0.42	-0.31	-0.02	-0.68	-0.4 ± 0.25	-0.09	-0.26	-0.3	-0.51	-0.34	-0.3 ± 0.15	0.05	-0.08	0.42	0.13	0.47	0.2 ± 0.24	1.26	0.2	-1.03	-0.02	0.08	0.1 ± 0.81	1.27	0.44	1.09	-0.31	0.2	0.54 ± 0.65	-0.3	0.26	-0.11	0.36	0.38	0.43	0.26 ± 0.25	-0.5	0.37	0.7	-0.05	0.5	0.52	0.42 ± 0.33	0.01	0.3	-0.76	0.26	0
BcellWH2_00430	1.44	0.34	0.61	0.66	0.25	0.66 ± 0.47	-0.17	0.07	-0.2	-0.13	0.09	-0.07 ± 0.14	-1.3	-1.13	-1.22	0.3	-1.28	-0.92 ± 0.69	-0.3	-1.46	0.13	0.42	0.31	-0.18 ± 0.77	-0.52	0.74	-0.86	-0.4	0.23	-0.16 ± 0.64	0.13	-1.96	-1.92	-0.43	0.15	0.1	-0.52 ± 0.97	1.39	0.42	0.63	-1.88	0.26	-1.35	-0.58 ± 1.22	0.3	0.44	0.13	-0.23	0.75
BcellWH2_00447	0.41	0.24	-1.09	-0.72	-1.26	-0.48 ± 0.77	-0.1	0.17	0.04	-0.1	-1.01	-0.2 ± 0.47	-0.97	-0.42	-0.72	-0.49	-0.54	-0.63 ± 0.22	-0.82	0.03	-0.51	-0.49	-0.75	-0.51 ± 0.33	1.06	-0.33	-0.05	-0.53	-0.26	-0.02 ± 0.63	0.49	0.24	0.26	0.05	-1.26	0.51	-0.11 ± 0.79	-0.28	0.57	-0.65	0.17	-0.16	0.34	-0.07 ± 0.43	-0.86	-0.93	-1.05	0.13	0.51
BcellWH2_00465	-0.33	0.15	-0.88	-0.59	-0.77	-0.49 ± 0.41	-1.61	-1.14	-0.89	-1.06	-0.64	-1.07 ± 0.36	-0.98	-0.95	-0.98	-0.59	-1.13	-0.93 ± 0.2	-1.19	-0.72	-0.65	-0.47	-0.72	-0.75 ± 0.27	-0.41	-0.19	-0.83	-0.5	0.4	-0.31 ± 0.46	-0.03	-0.02	-1.57	-0.45	-1.11	0.64	-0.62 ± 0.96	-0.5	-0.42	1	-1.79	0.01	-0.73	-0.38 ± 1.18	0.72	-0.9	-0.82	-1.03	-0.93
BcellWH2_00466	-0.29	0.17	0.2	0.04	-0.45	-0.07 ± 0.29	0.1	-0.15	-0.13	0.09	-0.3	-0.08 ± 0.17	0.05	-1.38	0.03	-0.14	0.23	-0.24 ± 0.65	0.51	0.39	-0.77	0.21	0.33	0.13 ± 0.52	-0.96	0.79	0.63	1.02	0.62	0.42 ± 0.79	0.44	0.36	0.37	0.24	0.42	0.5	0.38 ± 0.11	1.39	0.02	-0.66	0.05	-1.87	0.21	-0.57 ± 0.95	-1.12	-1.16	0.36	-1.58	-1.27
BcellWH2_00468	-	-	-	-	-	-	-	-	-	-	-	-	-	-	-	-	-	-	-	-	-	-	-	-	-1.04	-0.83	-0.74	-0.87	-0.92	-0.88 ± 0.11	-0.88	-0.74	-1.49	0.28	-1.03	-0.49	-0.68 ± 0.76	-0.65	-0.81	-0.86	-0.78	-0.8	-0.77	-0.8 ± 0.04	-0.51	-0.63	-0.73	-0.72	-0.68
BcellWH2_00469	-1.24	0.35	-0.65	-0.68	-0.88	-0.62 ± 0.59	-1.4	-1.44	-0.96	-1.47	0.08	-1.04 ± 0.66	-0.71	-0.9	-0.71	-0.54	-0.86	-0.74 ± 0.14	-1.19	-1.17	-0.62	-0.87	-0.83	-0.94 ± 0.24	0.38	-0.49	-0.65	-0.18	0.13	-0.16 ± 0.42	0.31	0.14	-0.03	0.02	-0.1	-0.02	-0.03 ± 0.05	-0.15	0.41	0.25	-0.09	-0.1	-0.18	-0.03 ± 0.19	-1.01	-1.16	0.17	-0.12	-0.1
BcellWH2_00470	-	-	-	-	-	-	-	-	-	-	-	-	-	-	-	-	-	-	-	-	-	-	-	-	-0.88	-0.93	-0.68	-0.42	-0.96	-0.77 ± 0.22	-0.97	-0.95	-0.29	0.23	-0.78	-0.81	-0.41 ± 0.49	-0.74	-0.93	-0.98	-0.13	-0.91	-0.68	-0.67 ± 0.39	-0.74	-0.81	-0.58	-1.26	-0.51
BcellWH2_00471	-0.67	-1.56	-1.15	-1.26	-0.97	-1.12 ± 0.33	-1	-0.25	0.21	0.03	-0.11	-0.23 ± 0.47	0.35	0.9	0.67	0.59	0.09	0.52 ± 0.31	0.99	0.6	0.26	0.67	0.4	0.59 ± 0.28	-0.62	-1.14	-0.99	0.61	0.55	-0.32 ± 0.84	0.48	-1.48	0.58	0.67	0.59	0.05	0.47 ± 0.28	0.64	0.81	1.01	0.69	0.83	0.58	0.77 ± 0.19	-1.01	0.27	0.38	0.62	1.11
BcellWH2_00472	-0.79	-0.77	-0.62	-0.85	-1.14	-0.84 ± 0.19	-0.13	-1.24	-0.5	-1.05	-0.14	-0.61 ± 0.51	-0.88	-0.95	-0.56	-0.87	-0.33	-0.72 ± 0.26	-0.83	-0.62	-0.8	-0.87	-0.63	-0.75 ± 0.12	-1.08	-0.61	0.44	-0.8	0.41	-0.33 ± 0.71	-0.5	0.78	-1.26	-1.59	-0.64	-0.62	-1.03 ± 0.48	-1.07	-1.02	-0.92	-1.43	-0.71	-0.86	-0.98 ± 0.31	0.42	-0.62	0.32	-0.98	-0.82
BcellWH2_00474	1.56	0.4	-0.33	-0.9	0.5	0.25 ± 0.93	-0.2	-0.5	-0.1	-0.1	-0.14	-0.21 ± 0.17	-1.09	0.18	-0.68	-0.36	-0.82	-0.55 ± 0.49	-0.36	-0.42	0.36	0.32	-0.41	-0.1 ± 0.4	-0.93	1.3	-1.11	-0.43	0.17	-0.2 ± 0.98	-0.23	0.67	-0.19	0.31	0.33	0.54	0.25 ± 0.31	-0.41	-1.78	0.49	-0.14	-1.43	-0.45	-0.38 ± 0.8	0.48	0.07	0.55	0.32	-0.88
BcellWH2_00475	-	-	-	-	-	-	-	-	-	-	-	-	-	-	-	-	-	-	-	-	-	-	-	-	-0.7	-0.8	-0.33	-0.82	-0.96	-0.72 ± 0.24	-1.07	-0.15	-1.41	-0.78	-0.3	-0.45	-0.74 ± 0.49	-0.74	-0.95	-1.17	-0.85	-0.81	-0.44	-0.81 ± 0.3	-1.01	-0.95	-1.18	-0.72	-0.96
BcellWH2_00478	0.07	-0.93	-0.78	-0.62	-0.05	-0.46 ± 0.45	-1.29	-0.55	-1.02	-1.04	-0.61	-0.9 ± 0.31	-1.61	-0.9	-0.81	-1.01	-0.79	-1.02 ± 0.34	-1.09	-0.99	-1.21	-1.34	-0.38	-1 ± 0.37	-1.27	-0.33	-0.71	-1.21	-1.01	-0.91 ± 0.39	-1	-1.01	-0.09	0.25	-0.47	-0.82	-0.28 ± 0.46	-0.4	-0.76	-0.96	-0.92	-1.15	-0.64	-0.92 ± 0.21	-0.69	-0.79	-1.06	-0.64	-0.86
BcellWH2_00483	-	-	-	-	-	-	-	-	-	-	-	-	-	-	-	-	-	-	-	-	-	-	-	-	0.37	-0.6	0.14	-0.43	-0.83	-0.27 ± 0.51	-1.03	0.18	-1.91	-0.9	-0.88	-1.13	-1.2 ± 0.48	-0.78	0.3	-0.97	0.62	-1.16	-1.32	-0.71 ± 0.89	-0.94	-1.13	-0.93	-1.05	-0.59
BcellWH2_00516	-	-	-	-	-	-	-	-	-	-	-	-	-	-	-	-	-	-	-	-	-	-	-	-	-0.66	-0.36	-1.16	-1.45	-0.42	-0.81 ± 0.48	-1.06	-0.73	-0.37	-0.16	-0.67	-0.82	-0.51 ± 0.3	-0.68	-1.23	-0.56	-0.18	0.38	-0.67	-0.26 ± 0.48	-0.6	-0.86	-0.61	-0.77	-1.18
BcellWH2_00519	-0.36	-0.43	0.97	0.66	0.82	0.33 ± 0.67	0.64	0.66	0.66	0.68	0.85	0.7 ± 0.08	0.78	0.43	-1.2	-0.15	0.41	0.06 ± 0.78	-0.26	-1.12	0.62	0.42	0.94	0.12 ± 0.82	-1.21	0.56	1.45	-1.09	1.27	0.2 ± 1.28	1.12	0.41	0.93	0.52	0.82	1.14	0.85 ± 0.26	1.13	1.13	1.19	0.93	1.16	0.05	0.83 ± 0.53	0.18	1.29	0.31	1.24	1.26
BcellWH2_00521	-0.86	-0.99	-0.74	-0.91	-0.85	-0.87 ± 0.09	-0.34	-0.78	0.35	-1.02	-0.13	-0.38 ± 0.54	-1.24	-0.72	-1.27	-0.58	-1.47	-1.05 ± 0.39	-1.1	0.29	-1.28	-0.57	-1.15	-0.76 ± 0.65	-0.7	-0.69	-0.88	-0.36	-1.42	-0.81 ± 0.39	0.39	0.28	-1.03	-0.23	-0.79	-1.2	-0.81 ± 0.42	-0.48	0.05	-0.93	-0.26	0.57	-0.11	-0.19 ± 0.61	0.37	0.17	-1.01	-1.22	-0.91
BcellWH2_00522	-	-	-	-	-	-	-	-	-	-	-	-	-	-	-	-	-	-	-	-	-	-	-	-	-1.21	-0.57	-0.76	-0.66	-0.69	-0.78 ± 0.25	-0.77	-0.81	0.18	0.14	-0.68	-1.03	-0.35 ± 0.61	-0.88	-0.77	-0.96	-0.67	-1.23	-0.82	-0.92 ± 0.24	-1.07	-1.16	-0.8	-1.08	-0.8
BcellWH2_00525	-1.07	-0.31	0.51	-0.27	0.54	-0.12 ± 0.67	-1.77	-1.21	-1.01	-1.05	-1.53	-1.32 ± 0.33	-0.76	-0.76	-0.7	-1.1	-0.83	-0.83 ± 0.16	-1.1	-0.71	-1.1	-0.95	-1.04	-0.98 ± 0.16	-0.83	-1	-0.87	-0.72	-0.15	-0.71 ± 0.33	-1.31	-0.53	-1.07	-1.08	-0.37	-1.4	-0.98 ± 0.43	-0.96	-0.42	-1.13	-0.74	-0.48	-0.91	-0.81 ± 0.27	-0.83	-0.46	-0.62	-0.87	-1.16
BcellWH2_00526	0.88	1.25	0.89	1.8	1.58	1.28 ± 0.41	0.8	0.49	0.71	0.6	0.78	0.68 ± 0.13	0.74	0.74	0.69	1.41	1.64	1.04 ± 0.45	0.81	1.03	-1.32	-0.31	0.46	0.13 ± 0.96	1.04	1.16	0.93	0.79	0.93	0.97 ± 0.14	0.98	1.01	0.69	0.97	0.87	0.66	0.8 ± 0.15	0.13	0.37	0.36	0.81	0.9	0.19	0.56 ± 0.34	0.47	0.47	0.82	1.03	1.01
BcellWH2_00556	-0.29	0.5	1.14	0.43	0.26	0.41 ± 0.51	0.35	0.92	0.63	0.68	0.91	0.7 ± 0.23	1.38	1.28	1.03	0.9	0.91	1.1 ± 0.22	-0.6	0.94	0.97	-0.53	1.06	0.37 ± 0.85	1.52	1.75	1.84	1.46	1.6	1.63 ± 0.16	1.85	1.59	1.3	1.51	1.63	1.77	1.55 ± 0.2	1.52	1.25	1.61	1.63	1.33	1.52	1.52 ± 0.14	1.5	1.26	1.67	1.66	1.53
BcellWH2_00561	-0.74	-1.11	-1	-0.56	-0.95	-0.87 ± 0.22	-1.48	-0.91	-0.44	0.08	0.11	-0.53 ± 0.68	-1.21	-0.93	-0.64	-1.07	-0.85	-0.94 ± 0.22	-0.72	-1.12	-1.12	-0.84	-1.06	-0.97 ± 0.18	-1.14	-0.77	-0.88	-0.84	-1.1	-0.94 ± 0.16	-1.1	-0.24	-0.86	0.01	-0.67	0.46	-0.26 ± 0.61	-0.81	-0.53	-0.95	-0.61	-0.87	-0.83	-0.81 ± 0.15	-0.84	-0.44	-0.03	-1.28	-0.79
BcellWH2_00564	-	-	-	-	-	-	-	-	-	-	-	-	-	-	-	-	-	-	-	-	-	-	-	-	-0.59	-0.36	-0.53	-0.5	0.18	-0.36 ± 0.32	0.47	-1.15	0.18	0	-0.47	0.28	0 ± 0.33	-0.65	0.58	0.08	-0.17	-0.12	-0.54	-0.19 ± 0.26	-0.25	-0.84	0.25	-1.77	-0.12
BcellWH2_00565	1.18	0.75	1.25	0.66	0.66	0.9 ± 0.29	0.42	0.57	0.63	0.37	0.09	0.42 ± 0.21	0.55	-1.34	0.65	0.52	0.51	0.18 ± 0.85	-0.38	-1.52	0.66	-0.92	-1.72	-0.78 ± 0.96	0.28	-0.11	-0.6	-0.2	0.61	0 ± 0.46	-0.06	0.31	0.11	-1.97	-0.03	-1.5	-0.85 ± 1.04	1.15	-0.69	-0.32	-1.75	0.46	0.38	-0.31 ± 1.02	0.38	0.56	-0.66	-1.36	-0.26
BcellWH2_00566	-	-	-	-	-	-	-	-	-	-	-	-	-	-	-	-	-	-	-	-	-	-	-	-	-1.02	-0.7	-1.03	-0.68	-0.75	-0.83 ± 0.17	-1.17	-0.72	-0.22	0.16	-1.3	-0.35	-0.43 ± 0.62	-0.57	-0.39	-0.42	-0.5	-0.81	-0.76	-0.62 ± 0.19	-1.13	-1.01	-1.11	-1.34	-0.96
BcellWH2_00568	1.92	0.6	0.62	0.3	0.18	0.72 ± 0.7	0.21	0.18	0.07	0.33	0.31	0.22 ± 0.1	-1.52	0.36	-1.52	0.57	0.44	-0.33 ± 1.09	-0.52	0.32	0.54	-0.31	-0.75	-0.14 ± 0.55	1.32	-1.1	0.28	0.43	0.15	0.22 ± 0.86	0.31	-0.13	0.1	0.47	0.67	0.64	0.47 ± 0.26	0.67	0.28	0.97	0.72	0.44	0.64	0.69 ± 0.22	0.22	0.83	0.64	0.08	0.62
BcellWH2_00578	1.2	0.73	0.64	0.61	0.69	0.78 ± 0.24	0.64	-0.27	0.28	0.43	0.44	0.3 ± 0.35	0	-0.21	0.59	0.11	-0.33	0.03 ± 0.36	-0.49	0.87	-1.19	0.33	0.28	-0.04 ± 0.81	1.1	1.04	1.18	1.52	1.18	1.2 ± 0.19	0.73	0.94	0.67	1.01	0.73	0.83	0.81 ± 0.15	0.81	1.07	0.68	0.84	0.74	0.79	0.76 ± 0.07	0.77	1.07	1.11	1.18	1.24
BcellWH2_00587	-0.73	-0.89	-0.46	-1.03	-1.26	-0.87 ± 0.3	-0.74	-0.85	-0.32	-1.19	-0.29	-0.68 ± 0.38	-0.97	-1.34	-0.78	-0.81	-0.84	-0.95 ± 0.23	-0.68	-0.56	-0.91	-0.47	-0.69	-0.66 ± 0.17	-0.73	-0.86	-0.8	-0.45	-1.34	-0.84 ± 0.32	0.23	-0.97	-0.35	-0.72	-1.38	-0.96	-0.85 ± 0.43	-0.7	0.48	-1.21	0.19	0.31	0.18	-0.13 ± 0.72	0.18	-0.39	-1.68	-0.2	0.28
BcellWH2_00592	-	-	-	-	-	-	-	-	-	-	-	-	-	-	-	-	-	-	-	-	-	-	-	-	-1.04	-1.18	-0.74	0.1	0.12	-0.55 ± 0.62	-0.64	-0.71	-1.23	-1.24	-1.05	-0.72	-1.06 ± 0.24	-0.72	-0.89	-0.84	-1.27	-1.04	-0.51	-0.91 ± 0.32	-1.1	-0.69	-1.12	-0.07	-0.78
BcellWH2_00603	-0.73	0.48	-0.21	-0.98	-0.32	-0.35 ± 0.56	-1.1	-0.76	-0.89	-1.13	-1.72	-1.12 ± 0.37	-0.86	-0.7	-1.33	-0.43	-1.07	-0.88 ± 0.34	-1.08	-0.57	-1.12	-0.92	-0.57	-0.85 ± 0.27	-	-	-	-	-	-	-	-	-	-	-	-	-	-	-	-	-	-	-	-	-	-	-	-	-
BcellWH2_00609	-0.81	0.06	-0.63	-1.16	-1.12	-0.73 ± 0.49	-1.62	-0.24	-0.15	-0.2	-1.53	-0.75 ± 0.76	-1.21	0.22	-0.44	-0.91	-0.23	-0.51 ± 0.56	-1.24	-0.55	-0.65	-0.77	-0.67	-0.77 ± 0.27	-	-	-	-	-	-	-	-	-	-	-	-	-	-	-	-	-	-	-	-	-	-	-	-	-
BcellWH2_00610	1.1	1.33	1.43	1.37	1.65	1.37 ± 0.2	1.28	1.74	1.43	1.64	1.67	1.55 ± 0.19	0.78	0.8	1	1.59	1.2	1.07 ± 0.33	1.09	1.39	2.05	1.46	1.69	1.54 ± 0.36	1.47	1.76	1.18	1.11	1.94	1.49 ± 0.36	1.53	1.46	1.52	1.41	1.74	1.5	1.54 ± 0.14	1.39	1.29	1.56	1.63	1.55	1.71	1.61 ± 0.08	1.82	1.32	1.6	1.79	1.01
BcellWH2_00611	2.22	1.15	1.48	1.55	1.33	1.55 ± 0.41	0.8	1.75	1.55	1.26	1.36	1.34 ± 0.36	1.11	1.6	1.56	0.97	1.88	1.42 ± 0.37	1.51	1.49	0.46	-0.3	0.77	0.79 ± 0.76	1.52	1.64	1.73	1.52	1.55	1.59 ± 0.09	1.41	1.78	1.59	1.82	2.03	1.75	1.8 ± 0.18	1.99	1.47	1.71	1.69	1.56	1.56	1.63 ± 0.08	1.68	1.67	1.89	1.39	1.7
BcellWH2_00618	1.39	0.31	0.93	1.08	0.92	0.93 ± 0.39	0.2	0.65	0.36	0.3	0.27	0.36 ± 0.18	0.71	-0.28	0.57	0.29	0.19	0.3 ± 0.38	1.08	0.04	-0.22	0.39	0.35	0.33 ± 0.49	0.34	0.97	-0.48	0.47	0.51	0.36 ± 0.53	0.68	0.94	0.51	0.61	0.58	0.15	0.46 ± 0.21	1.09	0.7	0.53	0.91	0.73	0.89	0.76 ± 0.18	0.8	0.26	0.77	0.63	0.5
BcellWH2_00619	1.5	-0.13	-0.15	-1.23	0.26	0.05 ± 0.98	-0.41	-0.08	0.33	0.41	0.21	0.09 ± 0.33	0.14	0.4	-0.83	-1.32	-1.28	-0.58 ± 0.81	1.28	0.27	-0.51	0.37	-1.28	0.03 ± 0.97	0.81	-0.19	0.39	0.82	0.56	0.48 ± 0.42	0.46	0.3	0.68	0.34	-0.04	0.39	0.34 ± 0.29	0.4	0.13	-0.73	0.3	-0.49	0.02	-0.22 ± 0.47	0.5	0.72	0.55	0.85	0.46
BcellWH2_00623	-	-	-	-	-	-	-	-	-	-	-	-	-	-	-	-	-	-	-	-	-	-	-	-	-0.73	-0.8	-0.96	-1.16	-1.02	-0.93 ± 0.17	-0.94	-1.15	-0.74	-0.85	-0.74	-0.93	-0.81 ± 0.09	-0.71	-1.06	-0.99	-0.87	-0.58	-1.21	-0.91 ± 0.26	-0.52	-0.54	-1.29	-0.64	-0.74
BcellWH2_00626	-0.28	-0.84	-0.72	0.2	0	-0.33 ± 0.45	-0.28	-0.38	0.04	-0.55	-0.41	-0.32 ± 0.22	0.46	0.4	0.23	-0.15	0.1	0.21 ± 0.25	-0.3	-0.11	0.38	-0.11	0.02	-0.02 ± 0.25	-0.59	0.18	-0.39	-0.43	-0.61	-0.37 ± 0.32	0.04	0.3	0.19	0.18	0.21	-0.31	0.07 ± 0.26	-0.68	0.37	0.33	-0.03	0.41	0.01	0.18 ± 0.22	-1.21	-0.05	-0.27	0.49	0.93
BcellWH2_00628	-0.86	-1.01	-1.08	-0.77	-0.11	-0.77 ± 0.39	-1.51	-1.1	-0.73	-0.58	-0.41	-0.87 ± 0.44	-0.68	-0.22	-0.75	-1.01	-1.08	-0.75 ± 0.34	-0.96	-0.9	-1.03	-0.55	-0.72	-0.83 ± 0.19	0.05	-0.75	0.19	0.27	-0.18	-0.08 ± 0.41	-0.51	-0.31	-0.5	-0.77	-1.52	-1.16	-0.99 ± 0.44	-0.48	-0.4	-0.59	-0.37	-0.22	-0.12	-0.33 ± 0.21	-0.02	0.13	-1.17	-0.3	-0.06
BcellWH2_00634	-0.46	0.19	0.38	-0.25	-0.2	-0.07 ± 0.34	0.45	-0.93	-0.04	-0.56	-0.87	-0.39 ± 0.59	-0.83	-1.15	-0.57	-1	-0.31	-0.77 ± 0.33	-0.54	-0.9	-0.83	-0.15	-0.81	-0.65 ± 0.31	-0.99	-0.61	-0.78	-0.82	0.18	-0.6 ± 0.46	0.06	0.46	-0.31	-0.26	-0.76	-0.8	-0.53 ± 0.29	-0.49	-1.28	-0.65	-0.72	-0.72	-0.45	-0.63 ± 0.13	-0.27	-0.71	-0.97	-0.03	-0.49
BcellWH2_00640	-0.29	-1.5	0.61	0.25	-0.11	-0.21 ± 0.8	-0.62	0.24	-0.39	0.28	0.19	-0.06 ± 0.42	0.88	-0.96	-0.47	-1.33	-0.67	-0.51 ± 0.84	-0.28	-0.92	-0.54	-0.46	-0.18	-0.48 ± 0.29	0.55	0.21	-0.38	0.84	-0.12	0.22 ± 0.49	0.63	0.46	1	1.31	0.7	0.79	0.95 ± 0.27	-0.71	0.46	0.45	0.6	0.56	-0.25	0.34 ± 0.4	-0.09	0.54	-0.38	0.57	-0.08
BcellWH2_00641	1.11	1.45	1.45	1.63	1.72	1.47 ± 0.23	1.65	1.7	1.63	1.71	1.72	1.68 ± 0.04	1.62	1.66	1.22	1.48	1.19	1.44 ± 0.22	1.63	1.63	1.35	1.46	1.71	1.56 ± 0.15	1.89	1.87	1.8	1.88	1.73	1.84 ± 0.07	1.72	1.75	1.82	1.84	1.81	1.99	1.87 ± 0.09	1.34	1.87	1.69	1.69	1.83	1.73	1.74 ± 0.06	1.75	1.82	1.73	1.95	1.81
BcellWH2_00642	-1.16	-0.27	-0.61	-0.85	-0.63	-0.71 ± 0.33	-0.76	-1.02	-1.79	-0.84	-0.89	-1.06 ± 0.42	0.6	-1.06	0.43	-0.2	-1.19	-0.29 ± 0.82	-0.59	-0.3	-0.31	-0.78	-0.78	-0.55 ± 0.24	-0.28	-0.56	-0.95	-0.44	0.52	-0.34 ± 0.54	-0.08	-1.2	-0.64	-0.55	0.28	-0.11	-0.25 ± 0.42	-0.4	0.74	-0.35	0.17	0.52	-1.24	-0.22 ± 0.77	-0.98	0.03	0.49	-1.73	0.38
BcellWH2_00651	-	-	-	-	-	-	-	-	-	-	-	-	-	-	-	-	-	-	-	-	-	-	-	-	-1.2	-1.07	-1.24	-0.97	-0.55	-1.01 ± 0.27	-0.59	-0.6	-0.89	0.21	-1.18	-0.92	-0.7 ± 0.62	-0.94	-1.1	-0.72	-1.1	-0.74	-0.75	-0.83 ± 0.18	-1.01	-1.08	-0.69	-1.05	-0.4
BcellWH2_00656	-	-	-	-	-	-	-	-	-	-	-	-	-	-	-	-	-	-	-	-	-	-	-	-	-1.03	0.17	-0.77	-0.48	0.35	-0.35 ± 0.59	-0.44	0.49	0.36	0.08	-0.63	-1.67	-0.47 ± 0.9	-0.29	0.79	-1.02	0.33	0.29	-0.14	-0.13 ± 0.63	-0.12	0.25	-1.34	0.4	1.29
BcellWH2_00660	1.6	0.19	0.55	0.38	0.06	0.56 ± 0.61	-0.58	-0.2	-0.2	-0.64	-0.35	-0.39 ± 0.21	-0.14	0.2	-1.06	-0.34	-0.88	-0.44 ± 0.52	-0.33	-0.82	-0.97	-1.19	0.42	-0.58 ± 0.64	-0.88	-0.78	0.46	-1.09	0.01	-0.46 ± 0.66	-1.27	0.89	-1.32	-1.92	-0.43	-1.57	-1.31 ± 0.63	-0.46	-0.87	-0.49	0.09	0.39	0.41	0.1 ± 0.42	-0.83	-0.94	-1.02	0.15	-0.98
BcellWH2_00662	-	-	-	-	-	-	-	-	-	-	-	-	-	-	-	-	-	-	-	-	-	-	-	-	-0.78	-0.28	-0.4	-0.43	-0.39	-0.46 ± 0.19	-0.74	-0.92	-0.77	-1.49	0.62	-0.75	-0.6 ± 0.89	-0.57	-1.18	-0.82	-1.29	-1.27	0.7	-0.67 ± 0.94	-0.44	-0.51	-1.27	0.72	-0.05
BcellWH2_00669	-	-	-	-	-	-	-	-	-	-	-	-	-	-	-	-	-	-	-	-	-	-	-	-	-0.23	-0.44	-0.86	-0.96	-0.86	-0.67 ± 0.31	0.42	-1.23	0.12	0.14	-1.06	0.68	-0.03 ± 0.73	-0.35	0.14	-0.16	0.44	-2.02	0.9	-0.21 ± 1.28	-0.9	-0.25	-1.24	-1.09	-0.14
BcellWH2_00671	-1.06	-1.12	-0.99	-0.93	-0.4	-0.9 ± 0.29	-1.25	-1.3	-0.56	-0.17	-0.58	-0.77 ± 0.49	-0.85	-1.28	-0.78	-0.79	-0.85	-0.91 ± 0.21	-0.82	-0.89	-1.07	0.16	-0.87	-0.7 ± 0.49	-0.47	-0.76	-0.89	0.68	0.19	-0.25 ± 0.66	-0.37	-1.27	0.78	-1.04	-1.4	-1.12	-0.69 ± 1	-0.81	-0.17	-0.38	0.68	-0.27	-0.05	-0.01 ± 0.48	0.13	-0.22	-1.3	-0.43	0.25
BcellWH2_00672	-0.3	-1.05	-0.96	-0.62	-1.11	-0.81 ± 0.34	0.53	-0.95	-1.5	-1.4	-1.56	-0.98 ± 0.88	-0.36	-0.38	-0.54	-0.96	-0.68	-0.58 ± 0.25	-1	-0.97	-1.08	-0.56	-0.53	-0.83 ± 0.26	0.84	0.23	0.5	-0.65	-1.47	-0.11 ± 0.94	0.03	-0.71	-0.39	-1.45	0.01	-1.16	-0.75 ± 0.67	-0.8	0.87	-1.19	0.26	-1.54	0.77	-0.43 ± 1.11	-0.78	-0.84	-1.34	0.4	-1.03
BcellWH2_00673	-0.75	-0.5	-0.47	0.32	-0.58	-0.39 ± 0.41	0.2	-0.23	-0.15	0.21	0	0 ± 0.2	-0.59	0.3	0.19	0.55	-0.54	-0.02 ± 0.52	1.39	0.2	0.64	-1.16	0.58	0.33 ± 0.94	0.52	-0.58	0.08	-0.35	0.43	0.02 ± 0.48	-0.36	0.04	0.61	0.03	-0.16	-1.45	-0.24 ± 0.87	-0.2	-0.76	-0.6	0.22	-0.33	0.03	-0.17 ± 0.36	0.3	-1.03	-1.02	0.49	0.32
BcellWH2_00676	-	-	-	-	-	-	-	-	-	-	-	-	-	-	-	-	-	-	-	-	-	-	-	-	-0.62	-0.87	-0.82	-0.84	-0.94	-0.82 ± 0.12	-0.63	-0.87	-1.25	-1.02	-0.63	-0.85	-0.94 ± 0.26	-0.73	-1.26	-0.77	-0.7	-0.96	0.14	-0.57 ± 0.49	-1.01	-0.86	-0.7	-0.3	-1.01
BcellWH2_00678	-	-	-	-	-	-	-	-	-	-	-	-	-	-	-	-	-	-	-	-	-	-	-	-	-0.91	-0.61	-1.06	-1.32	-1.26	-1.03 ± 0.28	0.38	-0.92	-0.11	0.28	-0.84	-0.67	-0.33 ± 0.51	-1.08	-1.11	-0.92	0.25	-0.1	-0.42	-0.3 ± 0.5	-1.41	-0.6	-0.69	-0.6	-0.35
BcellWH2_00679	-	-	-	-	-	-	-	-	-	-	-	-	-	-	-	-	-	-	-	-	-	-	-	-	0.42	-0.34	0.22	-0.26	-0.7	-0.13 ± 0.45	-0.26	-0.99	-0.5	-0.56	-1.36	-0.26	-0.67 ± 0.48	-0.49	0.39	-1.02	-0.4	-1.28	-1.18	-0.97 ± 0.39	-0.77	0.38	-0.16	-0.24	-0.29
BcellWH2_00688	-0.71	-0.95	-0.66	-1.48	-1.08	-0.98 ± 0.33	-0.81	-0.55	-0.18	-0.82	-0.07	-0.48 ± 0.35	0.61	0.38	-0.14	0.34	0.02	0.24 ± 0.3	-0.02	0.08	-0.38	-0.72	-0.03	-0.21 ± 0.33	-0.34	-0.79	-0.3	-0.4	-0.07	-0.38 ± 0.26	0.03	-0.07	-1.69	-0.43	-0.64	-0.06	-0.71 ± 0.7	-0.61	-0.98	0.24	-0.4	-1.35	0.56	-0.24 ± 0.84	-1.09	-0.08	0.54	-0.23	-0.82
BcellWH2_00693	-	-	-	-	-	-	-	-	-	-	-	-	-	-	-	-	-	-	-	-	-	-	-	-	-1.03	-0.61	-0.63	-0.89	-0.87	-0.81 ± 0.18	-0.78	-1.01	-1.12	-1.14	-0.73	-0.76	-0.94 ± 0.22	-0.49	-0.43	-0.68	-1.09	-0.89	-0.75	-0.85 ± 0.18	-0.93	-0.71	-0.62	-0.7	-1.14
BcellWH2_00717	-0.74	-0.78	-0.61	-0.58	0.05	-0.53 ± 0.34	-1.64	-1.34	-0.41	-0.93	-0.63	-0.99 ± 0.5	0.6	-0.11	0.83	0.15	0.74	0.44 ± 0.4	-0.36	0.33	0.68	-0.84	-1.23	-0.29 ± 0.79	-0.25	-0.54	-0.14	-0.75	-0.22	-0.38 ± 0.25	-0.17	0.35	-0.55	-0.47	0.35	-1.72	-0.6 ± 0.85	-0.43	-0.17	-0.78	-0.53	-0.34	-0.12	-0.44 ± 0.28	-0.72	0.28	-0.8	-0.62	0.21
BcellWH2_00718	-0.93	-0.9	-1.31	-0.77	-0.63	-0.91 ± 0.25	-0.05	-0.65	-1.31	-1.09	-0.41	-0.7 ± 0.51	-1.22	-0.98	-0.94	-0.59	-0.95	-0.94 ± 0.23	-1.31	-0.73	-0.49	-1.3	-0.74	-0.91 ± 0.37	-	-	-	-	-	-	-	-	-	-	-	-	-	-	-	-	-	-	-	-	-	-	-	-	-
BcellWH2_00720	-0.38	-0.06	0.7	0.42	0.18	0.17 ± 0.42	-0.17	-0.27	-0.8	-0.58	-0.08	-0.38 ± 0.3	-0.38	-1.03	0.4	-0.26	0.02	-0.25 ± 0.53	-0.52	-1	0.04	-1.11	-1.31	-0.78 ± 0.54	0.9	0.81	0.52	-0.05	0.17	0.47 ± 0.4	0.55	0.31	-0.41	0.31	0.42	0.49	0.2 ± 0.41	0.97	-1.67	0.81	-0.13	0.13	-0.08	0.18 ± 0.43	0.22	-0.08	0.64	-0.06	-0.89
BcellWH2_00723	-0.92	-1.07	-0.9	-0.44	-0.64	-0.79 ± 0.25	-0.33	-1.06	-0.31	-1.54	-0.4	-0.73 ± 0.55	-1.08	-0.96	-0.48	-0.16	0.06	-0.52 ± 0.5	-0.54	0.02	-0.57	-0.94	-0.88	-0.58 ± 0.38	-1.01	0.1	-0.51	-0.39	0.07	-0.35 ± 0.46	-1.7	-0.61	-0.36	-0.28	-0.59	0.01	-0.3 ± 0.25	-0.92	-0.82	-1.04	-0.13	-0.87	-0.76	-0.7 ± 0.4	0.24	-0.65	0.31	-0.03	-1.03
BcellWH2_00724	1.58	0.06	-0.13	0.48	0.75	0.55 ± 0.67	-0.16	-1.93	0	0.06	-0.14	-0.43 ± 0.84	1.24	-0.82	0.15	-1.5	-0.78	-0.34 ± 1.06	2	-1.09	-0.56	-1.01	-1.06	-0.34 ± 1.33	1.19	1.6	0.79	-0.98	1.24	0.77 ± 1.02	1.16	1.18	0.82	1.16	1.19	0.56	0.93 ± 0.3	0.8	0.96	1.24	1.19	1.32	1.58	1.33 ± 0.17	1.31	0.97	1.24	1.31	0.95
BcellWH2_00725	-	-	-	-	-	-	-	-	-	-	-	-	-	-	-	-	-	-	-	-	-	-	-	-	-0.87	-1.29	-1.16	-1.1	-0.5	-0.98 ± 0.31	-0.45	-1.04	0.36	-1.04	-0.47	-1.22	-0.59 ± 0.71	-0.69	-1.18	-0.87	-0.58	-0.7	-1.05	-0.8 ± 0.21	-0.79	-0.92	-1.02	-0.7	-0.83
BcellWH2_00726	-	-	-	-	-	-	-	-	-	-	-	-	-	-	-	-	-	-	-	-	-	-	-	-	-1.15	-1.02	-0.96	-1.01	-0.75	-0.98 ± 0.14	-0.75	-0.65	-0.58	-1.12	-0.78	-0.77	-0.81 ± 0.23	-1.2	-0.96	-0.43	-0.04	-0.87	-0.76	-0.53 ± 0.37	-1.01	-0.89	-0.88	-0.59	-0.71
BcellWH2_00727	-0.7	-0.21	-0.89	-1.14	-0.82	-0.75 ± 0.34	-0.37	-1.17	-0.53	-0.98	-1.58	-0.93 ± 0.49	-1.21	-0.43	-0.65	-0.12	-1.25	-0.73 ± 0.49	-0.85	-1.15	-0.46	-0.74	-0.74	-0.79 ± 0.25	-0.54	-0.92	-0.72	-0.72	0.83	-0.41 ± 0.71	-0.92	-0.94	-1.08	0.12	-0.92	-1.2	-0.77 ± 0.6	-0.4	0.32	-1.19	-1.18	0.52	-0.71	-0.64 ± 0.8	0.54	-0.87	-1.03	-0.94	-0.82
BcellWH2_00728	-	-	-	-	-	-	-	-	-	-	-	-	-	-	-	-	-	-	-	-	-	-	-	-	-0.44	-0.91	-0.59	-0.85	-0.92	-0.74 ± 0.22	-0.89	-0.73	-0.84	-1.45	-0.7	-0.62	-0.9 ± 0.38	-0.72	-0.88	-1.01	-0.92	0.96	1.6	0.16 ± 1.32	-0.63	-0.93	-0.75	-0.62	-0.95
BcellWH2_00730	-	-	-	-	-	-	-	-	-	-	-	-	-	-	-	-	-	-	-	-	-	-	-	-	0.22	-0.58	-0.72	-1.04	-0.38	-0.5 ± 0.47	-0.89	-0.56	-1.18	-1.07	-0.99	-0.81	-1.01 ± 0.15	-0.84	-0.88	-0.78	-0.75	-0.95	-1.23	-0.93 ± 0.22	-0.97	-0.66	-0.64	-0.73	-0.74
BcellWH2_00736	-	-	-	-	-	-	-	-	-	-	-	-	-	-	-	-	-	-	-	-	-	-	-	-	-1.17	-1.15	-0.37	-0.94	-0.74	-0.87 ± 0.33	-0.35	-0.69	-1.17	-0.09	-0.68	-0.95	-0.72 ± 0.47	-1.01	-0.12	-0.59	-1.16	-1.05	-0.78	-0.89 ± 0.26	-1.03	-0.65	-0.84	-0.66	-0.94
BcellWH2_00739	-0.82	-0.16	-0.34	-0.23	-0.81	-0.47 ± 0.32	-0.96	-0.59	-1.12	-1.61	-1.2	-1.1 ± 0.37	-0.78	-1.15	-0.76	-0.92	-0.9	-0.9 ± 0.15	-0.74	-0.54	-0.75	-0.69	-0.94	-0.73 ± 0.14	-	-	-	-	-	-	-	-	-	-	-	-	-	-	-	-	-	-	-	-	-	-	-	-	-
BcellWH2_00740	-0.1	0.39	0.18	0.4	-0.06	0.16 ± 0.24	-0.18	-0.26	-0.06	-0.78	-0.79	-0.41 ± 0.35	0.27	-0.18	-0.23	-0.54	-0.38	-0.21 ± 0.3	-0.32	0.16	0.04	-0.71	0.68	-0.03 ± 0.52	1.07	1.14	0.98	1.41	0.36	0.99 ± 0.39	-1.02	-1.66	0.08	-0.38	-0.27	-0.15	-0.18 ± 0.2	1.14	0.59	0.75	0.45	0.13	0.45	0.45 ± 0.25	0.18	0.52	0.47	0.28	0.55
BcellWH2_00742	1.55	-0.98	-0.62	-1.1	-0.9	-0.41 ± 1.11	-1.69	-1.32	-1.25	-1.25	-1.78	-1.46 ± 0.25	-1.09	0.82	-0.99	-0.96	-0.79	-0.6 ± 0.8	-0.89	1.53	-0.68	-0.45	-0.52	-0.2 ± 0.98	-0.78	-0.87	0.18	-1.07	-0.71	-0.65 ± 0.48	-0.84	-0.6	-1.15	-1.33	-0.17	-0.48	-0.78 ± 0.55	-0.76	-0.78	-1.21	-0.37	-0.77	-0.84	-0.8 ± 0.35	-0.67	-0.71	-0.62	-0.97	-1.04
BcellWH2_00743	1.21	1.16	0.63	1.1	0.83	0.99 ± 0.25	0.23	-0.01	0.03	-0.13	-0.55	-0.08 ± 0.29	0.35	0.97	0.85	0.09	1.34	0.72 ± 0.5	0.73	0.82	0.92	1	0.55	0.8 ± 0.17	0.7	0.77	0.4	1.5	0.99	0.87 ± 0.41	-0.79	-0.86	0.05	0.17	-1.24	-0.54	-0.39 ± 0.64	1.18	0.81	0.09	0.32	0.44	-0.04	0.2 ± 0.22	0.17	0.81	0.13	0.59	0.32
BcellWH2_00744	-0.52	0.09	-0.37	-0.73	-0.29	-0.37 ± 0.31	-0.86	-0.96	-1.41	-0.64	-0.89	-0.95 ± 0.28	-0.87	-0.25	0.15	-0.45	0.17	-0.25 ± 0.44	-0.91	0.92	-0.31	-0.02	-1	-0.26 ± 0.78	0.51	-0.17	0.63	0.7	0.07	0.35 ± 0.38	-1.52	-1.64	-0.88	-0.76	-0.71	-0.23	-0.64 ± 0.29	0.17	-0.06	-0.57	-0.09	-1.66	0	-0.58 ± 0.76	0.23	0.18	-0.5	-0.08	-0.22
BcellWH2_00745	1.05	0.91	0.25	0.23	-0.08	0.47 ± 0.48	-0.46	-1.72	-1	-1.09	-0.43	-0.94 ± 0.53	-1.65	0.75	-0.43	0.43	-0.28	-0.23 ± 0.93	-0.49	1.12	0.61	0.31	-0.02	0.31 ± 0.61	0.19	1.01	-0.17	0.79	0.64	0.49 ± 0.48	-1.59	-1.51	-1.09	-0.76	-1.07	-0.77	-0.92 ± 0.18	1.07	0.56	0.42	-0.01	-0.79	-0.41	-0.2 ± 0.52	0.02	0.21	-0.23	0.32	0.5
BcellWH2_00746	-	-	-	-	-	-	-	-	-	-	-	-	-	-	-	-	-	-	-	-	-	-	-	-	-0.6	-0.17	-0.98	-0.74	-1.02	-0.7 ± 0.34	-0.8	-0.91	-1.08	-0.54	-0.99	-0.35	-0.74 ± 0.35	-0.68	-1.11	-0.8	-0.78	-1.19	-1.04	-0.95 ± 0.2	-1.04	-0.87	-0.33	-0.06	-0.48
BcellWH2_00753	-	-	-	-	-	-	-	-	-	-	-	-	-	-	-	-	-	-	-	-	-	-	-	-	0.49	-0.67	-1.07	-0.68	-0.1	-0.41 ± 0.61	-0.08	0.22	-0.77	-0.04	-0.22	0.15	-0.22 ± 0.39	0.05	0.23	0.48	-0.61	-0.2	0.12	-0.05 ± 0.46	-0.81	-0.9	-0.06	-0.1	0.29
BcellWH2_00754	-0.47	0.82	0.52	0.48	0.96	0.46 ± 0.56	0.62	0.47	0.43	0.5	0.59	0.52 ± 0.08	0.41	0.21	0.07	0.7	0.3	0.34 ± 0.24	-0.42	0.39	0.43	0.73	0.07	0.24 ± 0.44	1.05	1.21	0.66	0.86	0.88	0.93 ± 0.21	0.8	0.93	0.76	0.78	1.08	0.85	0.87 ± 0.15	1.04	0.71	1.07	0.78	0.88	0.54	0.82 ± 0.22	1	0.83	1.06	0.78	0.57
BcellWH2_00802	-	-	-	-	-	-	-	-	-	-	-	-	-	-	-	-	-	-	-	-	-	-	-	-	-1.04	-0.43	-0.69	-0.63	-0.9	-0.74 ± 0.24	-0.51	-0.94	-0.44	-1.46	-1.05	-0.48	-0.86 ± 0.49	-0.95	-0.84	-0.59	-0.42	-0.97	-0.63	-0.65 ± 0.23	-0.54	-0.97	-0.64	-0.7	-0.83
BcellWH2_00869	-0.1	0.26	0.04	0.33	-1.26	-0.14 ± 0.65	0.24	-0.5	-1.37	0.03	-0.37	-0.39 ± 0.62	0.58	-0.81	-0.77	-0.12	0.18	-0.19 ± 0.6	-0.71	0.17	-0.42	-1.7	0.67	-0.4 ± 0.9	-0.63	0.32	-1.11	-0.98	0.15	-0.45 ± 0.65	0.44	0.26	0.34	0.4	0.53	0.44	0.43 ± 0.08	0.34	-0.07	0.34	0.43	0.34	0.46	0.39 ± 0.06	0.74	0.5	0.72	0.36	-0.99
BcellWH2_00874	-0.07	-0.01	0.22	0.32	-1.07	-0.12 ± 0.55	-0.15	-1.91	0.05	0.14	-0.03	-0.38 ± 0.86	-1.39	0.22	0.43	0.3	0.68	0.05 ± 0.82	-0.67	0.37	-0.6	0.79	0.6	0.1 ± 0.69	-	-	-	-	-	-	-	-	-	-	-	-	-	-	-	-	-	-	-	-	-	-	-	-	-
BcellWH2_00875	-	-	-	-	-	-	-	-	-	-	-	-	-	-	-	-	-	-	-	-	-	-	-	-	-1.22	-0.62	-0.41	-1.07	-0.85	-0.83 ± 0.33	-1.16	-0.18	-1.21	-0.51	-0.37	-0.86	-0.74 ± 0.38	-0.77	-0.88	-0.75	-0.92	-1.17	-0.88	-0.93 ± 0.18	-0.92	-0.21	-1	-0.78	-0.86
BcellWH2_00876	1.67	0.98	1.23	0.98	1.09	1.19 ± 0.29	1.1	1.12	0.95	0.95	0.96	1.02 ± 0.08	0.73	0.95	0.99	1.02	1.17	0.97 ± 0.16	1.09	0.99	1.23	1.3	1.44	1.21 ± 0.18	-0.83	2.25	2.03	-0.53	-0.35	0.51 ± 1.5	-0.69	1.1	-0.65	0.07	1.72	0.07	0.31 ± 1	1.67	-0.98	2.44	-0.57	-0.86	-1.74	-0.18 ± 1.82	-0.5	0.3	1.32	-1.22	-1.38
BcellWH2_00878	-1.17	0.39	-1.05	0.82	-1.15	-0.43 ± 0.96	-1.49	-0.76	-0.71	-1.17	-0.48	-0.92 ± 0.41	-0.63	-0.63	-0.45	-0.69	-0.96	-0.67 ± 0.18	-0.99	-0.63	-0.84	-0.89	-1.1	-0.89 ± 0.18	-0.5	-0.68	-0.69	0.47	-0.33	-0.34 ± 0.48	-1.25	-0.94	-0.76	-1.19	-0.24	-0.75	-0.74 ± 0.39	-0.71	-1.39	-0.52	-1.54	-0.66	-0.8	-0.88 ± 0.46	-0.72	-0.67	-0.57	-0.22	-0.93
BcellWH2_00880	-0.43	-0.02	0.55	-0.12	-1.3	-0.26 ± 0.68	-0.29	-1.99	-1.26	1.49	1.37	-0.14 ± 1.55	-1	0.68	-0.92	-0.5	-0.79	-0.51 ± 0.69	0.15	-0.86	-0.35	-0.74	-0.09	-0.38 ± 0.43	1.35	1.23	1.36	1.05	1.43	1.28 ± 0.15	1.48	1.06	1.58	1.42	1.69	0.89	1.39 ± 0.36	0.98	1.1	1.13	1.34	1.29	0.97	1.18 ± 0.17	1.55	1.42	1.25	1.5	1.61
BcellWH2_00882	0.97	0.91	1.54	1.18	1.22	1.17 ± 0.25	1.24	1.67	1.51	1.58	1.64	1.53 ± 0.17	1.45	1.59	1.64	1.82	1.19	1.54 ± 0.24	1.71	1.6	1.51	1.17	1.53	1.5 ± 0.2	1.4	1.34	1.61	2.15	0.9	1.48 ± 0.45	1.21	1.33	1.23	0.97	1.65	1.31	1.29 ± 0.28	1.67	1.41	1.15	1.07	1.16	0.49	0.97 ± 0.32	1.35	1.4	1.03	1.23	0.81
BcellWH2_00886	-1.36	-0.62	-1.02	-1.45	-1.11	-1.11 ± 0.32	-1.32	-1.23	-1.07	-1.18	-1.5	-1.26 ± 0.17	-0.82	-0.96	-0.94	-0.55	0.85	-0.48 ± 0.76	-0.96	-1.09	-1.38	-0.29	-0.98	-0.94 ± 0.4	-	-	-	-	-	-	-	-	-	-	-	-	-	-	-	-	-	-	-	-	-	-	-	-	-
BcellWH2_00890	3.26	3.25	3.33	3.54	3.35	3.35 ± 0.12	3.31	3.31	3.37	3.36	3.37	3.34 ± 0.03	3.24	3.3	3.37	3.24	3.29	3.29 ± 0.06	3	3.38	3.38	3.43	3.37	3.31 ± 0.17	3.48	3.44	3.46	3.42	3.64	3.49 ± 0.09	3.2	3.24	3.24	3.31	3.29	3.28	3.28 ± 0.03	3.45	3.61	3.45	3.36	3.53	3.22	3.39 ± 0.13	3.46	3.58	3.59	3.48	3.71
BcellWH2_00892	2.24	2.12	2.12	2.23	1.89	2.12 ± 0.14	2.04	1.97	2	1.91	1.97	1.98 ± 0.05	1.74	2.23	2.01	2.13	2.14	2.05 ± 0.19	1.93	2.29	1.93	2.24	2.15	2.11 ± 0.17	3.07	2.86	2.78	2.94	2.67	2.86 ± 0.15	2.55	2.42	2.57	2.44	2.62	2.5	2.53 ± 0.08	2.85	2.72	2.7	2.52	2.7	2.57	2.62 ± 0.09	2.53	2.82	2.56	2.51	2.53
BcellWH2_00894	-0.55	0.11	-1.23	-1.45	-0.63	-0.75 ± 0.62	-0.4	-0.18	-0.33	-0.19	-0.36	-0.29 ± 0.1	-0.08	-1.22	0.07	-0.09	0.01	-0.26 ± 0.54	-0.49	0.65	0.31	0.49	-0.02	0.19 ± 0.45	0.63	0.47	0.4	1.34	0.06	0.58 ± 0.47	-1.87	-0.34	-0.04	-1.88	-1.66	-0.56	-1.04 ± 0.88	-0.72	0.11	0.66	0.17	-0.25	-1.56	-0.25 ± 0.95	-0.56	-1.37	0.32	0.04	0.52
BcellWH2_00895	-0.44	-0.05	-0.79	-0.32	0.75	-0.17 ± 0.58	-1.41	-1.23	0.65	-0.38	-0.06	-0.49 ± 0.85	-0.04	-1.45	-0.78	0.82	-0.7	-0.43 ± 0.86	-0.4	-0.66	-0.75	-0.63	-0.77	-0.64 ± 0.15	-0.88	-0.67	-1.01	-0.88	-1.14	-0.92 ± 0.17	-0.31	0.03	0.29	-0.17	-0.84	-1.37	-0.52 ± 0.73	-0.52	-0.96	-0.66	0.18	0.12	-0.98	-0.34 ± 0.57	-0.81	-0.47	0.29	-0.91	-0.94
BcellWH2_00900	-	-	-	-	-	-	-	-	-	-	-	-	-	-	-	-	-	-	-	-	-	-	-	-	-0.64	-0.77	-1.18	-0.51	-0.9	-0.8 ± 0.26	-0.85	-1.01	-1.01	-0.78	-1.03	-1.18	-1 ± 0.17	-0.78	-1.08	-0.67	-1.21	-0.98	-0.05	-0.73 ± 0.5	-0.56	-0.85	-0.78	-0.94	0.83
BcellWH2_00911	1.67	2.02	1.92	2.09	1.91	1.92 ± 0.16	1.88	1.88	1.83	1.85	1.85	1.86 ± 0.02	1.9	1.76	1.87	2.06	1.89	1.89 ± 0.11	1.68	2.15	1.64	1.69	1.8	1.79 ± 0.21	1.9	1.81	1.64	1.78	1.33	1.69 ± 0.22	1.45	1.84	1.27	1.17	1.72	1.54	1.43 ± 0.25	1.83	1.33	1.86	1.07	1.53	1.65	1.53 ± 0.33	1.78	1.87	1.91	1.64	1.16
BcellWH2_00913	-0.77	-1.26	-0.27	1.24	1.43	0.07 ± 1.2	1.2	1.41	1.44	1.13	1.21	1.28 ± 0.14	1.56	1.5	1.65	1.44	1.76	1.58 ± 0.13	2.15	1.64	1.85	1.55	1.65	1.77 ± 0.24	1.3	2.22	2.23	2.36	2.43	2.11 ± 0.46	2.01	2.29	1.42	1.72	1.79	2.31	1.81 ± 0.37	-1	1.42	2.28	1.71	1.31	1.93	1.81 ± 0.4	1.72	0.78	2.11	1.84	0.66
BcellWH2_00916	0.08	0.97	0.76	-0.69	-0.22	0.18 ± 0.69	0.62	1.02	0.91	0.83	0.73	0.82 ± 0.16	1.19	1.25	1.19	0.95	1.06	1.13 ± 0.12	0.93	1.17	0.92	0.92	1.24	1.04 ± 0.16	0.93	0.6	0.76	0.99	0.85	0.82 ± 0.15	0.72	0.81	-0.6	0.92	0.85	0.85	0.51 ± 0.74	0.97	0.24	0.85	0.52	0.54	0.63	0.64 ± 0.15	0.88	0.18	0.86	-0.09	0.57
BcellWH2_00917	0.52	0.53	1.07	1.04	0.85	0.8 ± 0.27	0.85	0.92	0.98	1.02	1.11	0.98 ± 0.1	1.12	0.87	0.84	0.98	0.77	0.92 ± 0.13	1.02	0.81	1.14	1.16	0.96	1.02 ± 0.14	1.12	0.63	1.26	1.26	0.73	1 ± 0.3	0.95	1.1	0.83	0.61	0.6	1.13	0.79 ± 0.25	1.44	0.7	1.1	0.88	0.76	0.71	0.86 ± 0.18	1.08	1.18	0.95	1	0.87
BcellWH2_00919	-0.68	0.77	0.94	0.77	0.75	0.51 ± 0.67	1.04	1.23	1.23	1.23	1.42	1.23 ± 0.14	0.51	0.91	0.93	1.14	1.28	0.95 ± 0.29	0.28	1.26	1.18	1.31	0.94	0.99 ± 0.42	1.11	1.16	0.7	1.57	0.86	1.08 ± 0.33	0.75	0.91	1.11	1.21	1	0.87	1.05 ± 0.15	0.37	1.16	-1.4	0.9	0.5	0.62	0.16 ± 1.05	1.12	0.59	0.85	0.41	0.88
BcellWH2_00921	1.03	-1.46	-0.88	-1.2	-1.21	-0.75 ± 1.01	1.4	1.6	1.53	1.55	1.6	1.53 ± 0.08	1.77	1.65	1.56	1.92	1.6	1.7 ± 0.15	1.83	1.21	2.2	-0.05	1.21	1.28 ± 0.86	-1.14	-1.13	-1.07	-0.95	0.06	-0.85 ± 0.51	2.36	1.75	2.05	2.28	2.02	2.1	2.11 ± 0.12	2	1.97	1.69	2.16	2.15	2.01	2 ± 0.22	1.6	1.76	1.76	2.3	1.91
BcellWH2_00922	-0.97	-0.72	-0.86	-1.08	-1.03	-0.93 ± 0.14	-0.73	-1.21	-0.89	-0.56	-0.71	-0.82 ± 0.25	-0.68	0.08	-0.67	-0.87	-0.72	-0.57 ± 0.38	-0.96	-0.69	-1.36	-1	-0.48	-0.9 ± 0.33	-0.4	-0.57	-1.11	-0.68	-1.29	-0.81 ± 0.38	0.4	0.13	0.1	0.22	0.46	0.5	0.32 ± 0.19	-0.24	-1.11	-0.33	-0.41	-0.37	-0.77	-0.47 ± 0.2	-0.95	0.22	-0.1	-1.32	-1.46
BcellWH2_00923	-1.35	-0.53	-1.17	-1.43	-1.04	-1.1 ± 0.36	-1.11	-1.04	0.34	-1.06	-0.9	-0.75 ± 0.62	-0.93	-0.71	-1.02	-0.96	-1.31	-0.99 ± 0.21	-1.34	-0.57	-1.05	-0.36	-1.34	-0.93 ± 0.45	-1.05	-0.72	-0.92	-1.38	-1.08	-1.03 ± 0.24	-0.84	-0.65	-0.54	-0.5	-0.91	-1.06	-0.75 ± 0.28	-0.84	-0.5	-1.16	-0.72	-0.62	-0.83	-0.83 ± 0.24	-0.98	-0.78	-0.73	-0.84	-0.64
BcellWH2_00924	-0.88	-1.3	-0.78	-1.26	-1.29	-1.1 ± 0.25	1.68	1.77	1.77	1.98	1.9	1.82 ± 0.12	2.24	1.74	1.53	0.98	1.07	1.51 ± 0.51	0.92	0.86	0.92	0.81	1.11	0.92 ± 0.11	-1.01	-1.03	-1.21	-0.97	-1.35	-1.12 ± 0.16	1.95	1.84	1.83	1.84	1.96	1.96	1.9 ± 0.07	1.49	1.36	1.09	1.32	1.5	1.49	1.35 ± 0.19	1.18	1.18	1.14	1.32	0.87
BcellWH2_00925	-0.32	-1.26	-1.66	-1.33	-1.07	-1.13 ± 0.5	1.51	1.46	1.55	1.48	1.47	1.5 ± 0.04	0.83	1.34	0.79	1.21	0.05	0.84 ± 0.5	-0.24	0.36	-0.32	0.27	0.49	0.11 ± 0.37	-0.9	-1.04	-1.28	-0.35	-1.36	-0.99 ± 0.4	1.43	1.43	1.55	1.54	1.6	2.01	1.68 ± 0.22	0.52	0.93	0.78	0.99	1.09	1.14	1 ± 0.16	-0.18	0.96	0.71	1.13	0
BcellWH2_00926	-0.38	-1.45	-1.14	-0.87	-1.5	-1.07 ± 0.46	2.05	1.49	1.94	1.88	1.83	1.84 ± 0.21	1.45	1.55	1.24	1.45	0.15	1.17 ± 0.58	1.05	1.55	-0.87	1.22	1.37	0.86 ± 0.99	-1.22	-1.01	-1.46	-0.06	-1.27	-1 ± 0.55	1.7	1.58	1.63	1.75	1.58	1.64	1.65 ± 0.07	1.22	1.16	0.95	1.15	1.38	1.16	1.16 ± 0.18	0.61	1.06	0.96	1.14	0.92
BcellWH2_00927	-0.52	-1.63	-1.02	-1.04	-1.75	-1.2 ± 0.5	0.01	0.7	0.55	0.34	0.55	0.43 ± 0.27	0.93	0.92	0.71	0.19	-0.89	0.37 ± 0.77	1.4	0.2	-0.81	-0.58	-1.05	-0.17 ± 1	-0.82	-0.63	-0.84	-0.2	-0.99	-0.7 ± 0.31	0.79	-0.19	1.1	0.89	0.67	0.62	0.82 ± 0.22	0.04	0.36	-0.59	0.55	-0.16	-0.07	-0.07 ± 0.47	-1.04	-0.76	-0.76	-0.24	-1.31
BcellWH2_00928	1.75	1.15	1.03	1.12	1.54	1.32 ± 0.31	1.43	1.59	1.8	1.55	1.6	1.59 ± 0.13	2.26	1.88	1.93	1.74	1.91	1.94 ± 0.19	2.06	1.19	1.07	1.32	1.8	1.49 ± 0.42	1.98	1.84	2.1	1.89	2.14	1.99 ± 0.13	2.51	2.14	2.19	2.36	2.35	2.43	2.33 ± 0.1	2.41	2.42	2.25	2.23	2.52	2.3	2.32 ± 0.13	2.26	2.31	2.35	2.39	2.35
BcellWH2_00929	0.65	1.17	0.75	1.02	0.72	0.86 ± 0.22	0.9	0.73	1.12	0.69	1.07	0.9 ± 0.19	0.12	1.17	0.75	-0.47	0.48	0.41 ± 0.62	-0.55	0.59	1.02	-1.37	0.73	0.08 ± 1.01	1.04	0.54	1.07	1.27	1.18	1.02 ± 0.28	1.12	1.29	1.1	1.23	1.17	1.29	1.2 ± 0.08	1.21	1.12	1.07	1.16	1.21	1.33	1.2 ± 0.11	1.19	1.06	1.27	1.32	0.84
BcellWH2_00931	0.96	1.06	0.63	0.9	0.97	0.9 ± 0.17	1.13	0.91	1.04	1.14	0.88	1.02 ± 0.12	0.93	0.83	1.13	1.09	1.1	1.02 ± 0.13	1.4	-0.78	1.18	0.74	1.41	0.79 ± 0.92	0.31	0.48	0.48	-0.61	0.39	0.21 ± 0.47	0.46	0.77	1.19	0.46	0.6	0.5	0.69 ± 0.34	0.2	0.27	0.3	0.26	0.35	0.85	0.44 ± 0.27	0.17	0.62	0.54	0.41	0.33
BcellWH2_00932	1.84	1.69	2.12	1.98	1.7	1.87 ± 0.19	2.05	2.54	2.46	2.2	2.2	2.29 ± 0.2	2.44	2.48	2.65	2.42	2.63	2.53 ± 0.11	2.46	2.16	2.4	2.09	2.29	2.28 ± 0.15	1.84	2.4	2.38	2.25	2.26	2.22 ± 0.23	2.68	2.55	2.55	2.49	2.42	2.48	2.48 ± 0.05	2.18	2.49	2.34	2.57	2.63	2.76	2.58 ± 0.17	2.44	2.55	2.6	2.62	2.49
BcellWH2_00933	-0.6	0.89	-0.03	0.59	0.55	0.28 ± 0.59	0.98	0.69	0.79	0.9	0.81	0.84 ± 0.11	0.32	0.23	0.5	0.74	0.51	0.46 ± 0.2	-0.52	0.97	-0.81	0.82	0.74	0.24 ± 0.84	0.6	1.16	0.41	-0.67	0.84	0.47 ± 0.69	1.21	1.69	0.84	1.25	1.08	1.22	1.1 ± 0.19	0.69	0.64	0.95	0.87	0.84	1.11	0.94 ± 0.12	1.05	0.8	1.37	1.17	0.99
BcellWH2_00934	-0.33	-1.4	-1.56	0.21	-0.82	-0.78 ± 0.74	-0.05	-0.02	0.27	-0.18	-0.24	-0.05 ± 0.2	0.45	-1.51	0.63	0.08	-0.66	-0.2 ± 0.88	-0.46	-0.41	0.63	-1.34	0.51	-0.21 ± 0.81	-0.44	-0.77	-0.11	-0.42	-1.05	-0.56 ± 0.36	-0.23	-1.23	0.03	-0.06	0.41	0.52	0.22 ± 0.28	-0.48	-0.02	-1.1	0.17	-1.81	-0.2	-0.74 ± 0.89	-1.3	-0.7	-0.1	0.51	0.12
BcellWH2_00935	-0.63	1.18	-1.34	-0.17	-0.84	-0.36 ± 0.96	0.89	1.01	0.82	0.81	0.8	0.87 ± 0.09	0.62	0.72	0.15	0.48	0.29	0.45 ± 0.23	-0.47	0.7	0.15	0.78	-0.46	0.14 ± 0.6	1.59	0.25	1.32	-0.76	-0.4	0.4 ± 1.03	1.39	1.05	1.15	1.27	1.39	1.44	1.31 ± 0.13	-0.79	1.28	1.3	1.39	1.05	1.33	1.27 ± 0.15	1.24	1.32	0.96	1.43	0.51
BcellWH2_00937	0.91	1.32	1.17	1.31	1.21	1.18 ± 0.17	1.2	1.29	1.18	1	1.14	1.16 ± 0.11	1.28	1.25	1.12	0.99	1.26	1.18 ± 0.12	-0.39	0.97	1.15	-1.07	-1.19	-0.11 ± 1.11	1.57	1.89	1.66	-1.08	0.61	0.93 ± 1.23	1.83	2.21	0.89	1.83	2.04	2.02	1.7 ± 0.55	2.03	1.59	1.76	1.59	1.68	1.88	1.73 ± 0.12	1.11	1.61	2.05	1.87	1.62
BcellWH2_00938	-	-	-	-	-	-	-	-	-	-	-	-	-	-	-	-	-	-	-	-	-	-	-	-	-0.85	-0.23	-0.93	-0.99	-0.34	-0.66 ± 0.36	-0.93	-0.86	0.13	-0.65	-1.09	-0.81	-0.61 ± 0.52	-1.13	-0.92	-1.01	-0.74	-1.17	-1.18	-1.02 ± 0.2	-0.82	-0.64	-0.88	-0.81	0
BcellWH2_00939	-1.08	-0.93	-0.92	-0.9	-0.8	-0.93 ± 0.1	-1.24	0.03	0.04	-0.57	-0.31	-0.41 ± 0.53	-1.27	-0.72	-0.83	-0.78	-0.29	-0.78 ± 0.35	-1.19	-0.58	-0.89	-0.59	-0.47	-0.74 ± 0.29	-	-	-	-	-	-	-	-	-	-	-	-	-	-	-	-	-	-	-	-	-	-	-	-	-
BcellWH2_00942	-0.23	-0.34	0.5	0.71	0.23	0.18 ± 0.45	-0.71	-0.22	0.15	-0.23	0.35	-0.13 ± 0.41	-0.05	-0.44	0.29	-0.23	-0.45	-0.17 ± 0.31	-0.49	0.25	0.63	-1.34	0.43	-0.1 ± 0.81	1.68	1.84	1.89	1.66	1.75	1.76 ± 0.1	1.37	0.82	1.27	1.19	1.22	1.37	1.26 ± 0.08	1.8	1.77	1.64	1.19	1.58	1.35	1.44 ± 0.21	1.42	1.9	1.56	1.79	1.72
BcellWH2_00944	-0.34	0.95	1	0.39	-1.47	0.11 ± 1.03	-0.94	-1.57	-1.76	-1.09	-1.07	-1.29 ± 0.36	-1.2	1.08	1.25	0.71	1.31	0.63 ± 1.05	1.81	-0.33	-0.17	-0.73	-1.03	-0.09 ± 1.12	-0.67	-0.45	-1.09	-0.47	0	-0.54 ± 0.4	-1.56	0.9	0.61	0.01	-0.64	-0.83	-0.21 ± 0.66	-0.53	-1.05	-0.98	-1.3	-1.09	-0.67	-1.01 ± 0.26	-0.9	-1.05	-0.23	0.9	-0.87
BcellWH2_00948	-	-	-	-	-	-	-	-	-	-	-	-	-	-	-	-	-	-	-	-	-	-	-	-	-1.15	-1	-1.12	-1.01	-0.54	-0.96 ± 0.25	-0.5	-0.85	-1.05	-1.03	-0.71	-1	-0.95 ± 0.16	-1.15	-0.48	-0.74	-0.85	-1.03	-0.67	-0.82 ± 0.16	-1.27	-0.99	-0.78	-0.69	-0.38
BcellWH2_00952	-1.15	-1.03	0.02	-0.91	-1.1	-0.83 ± 0.48	-0.41	-0.73	-1.09	-0.29	-0.43	-0.59 ± 0.32	-0.99	-0.73	-1.25	-0.95	-1.23	-1.03 ± 0.21	-1.14	-1.02	-1.12	-0.72	-0.71	-0.94 ± 0.21	-0.45	-0.57	-0.64	-0.71	-1.12	-0.7 ± 0.26	-1.03	0.61	-0.66	-1.39	-1.03	-0.58	-0.92 ± 0.37	-0.38	-0.83	-0.49	-0.21	0.14	-1	-0.39 ± 0.48	0.01	-0.59	-0.25	-0.77	-1.22
BcellWH2_00953	-	-	-	-	-	-	-	-	-	-	-	-	-	-	-	-	-	-	-	-	-	-	-	-	-0.06	-0.78	-0.46	-0.81	-0.62	-0.55 ± 0.3	0.64	-0.88	-1	-1.31	-1.15	-0.69	-1.04 ± 0.26	-0.47	-0.9	-0.75	-1.23	-0.86	-0.77	-0.9 ± 0.23	-1.15	-0.87	-0.66	-0.94	-0.31
BcellWH2_00955	-	-	-	-	-	-	-	-	-	-	-	-	-	-	-	-	-	-	-	-	-	-	-	-	-0.83	-0.2	-0.85	-1.24	-0.62	-0.75 ± 0.38	-0.87	-0.59	-0.95	-1.01	-0.84	-0.3	-0.78 ± 0.32	-1.34	-0.85	-1.09	-0.88	-0.56	-1.01	-0.88 ± 0.24	-1.02	-1.31	-1.05	-0.61	-1.11
BcellWH2_00956	-1.26	-0.03	-0.58	-0.8	-1.06	-0.74 ± 0.48	-0.57	-1.34	-0.96	-0.98	-1.58	-1.09 ± 0.39	-0.49	-1.01	-1.13	-0.69	-0.29	-0.72 ± 0.35	-0.8	-0.98	-0.54	-0.79	-1.26	-0.87 ± 0.27	-1.06	-1.07	-0.89	-0.77	-1	-0.96 ± 0.13	-0.79	-1.13	-1.31	-0.84	-0.53	-0.7	-0.85 ± 0.34	-0.62	-0.06	-1.29	-1.17	-1.02	-0.78	-1.07 ± 0.22	-0.53	-0.6	-0.42	-0.65	-0.45
BcellWH2_00964	0.78	-0.65	0.72	-0.3	0.06	0.12 ± 0.63	-0.18	-0.14	-1.01	-0.05	-0.34	-0.35 ± 0.39	-0.23	-0.13	-1	-1.08	-0.4	-0.57 ± 0.44	-0.35	-1.12	-0.53	-0.71	-0.69	-0.68 ± 0.29	0.94	-0.91	0.2	0.52	-0.2	0.11 ± 0.71	-0.19	0.41	0.3	0	-0.49	-0.2	-0.1 ± 0.33	0.04	0.63	-0.04	0.17	-2	-0.09	-0.49 ± 1.02	0.64	0.13	-0.02	0.42	0.75
BcellWH2_00967	-	-	-	-	-	-	-	-	-	-	-	-	-	-	-	-	-	-	-	-	-	-	-	-	-0.18	-0.25	-0.7	-0.89	-0.76	-0.55 ± 0.32	-0.43	-0.7	0.42	-1.69	-0.98	-0.66	-0.73 ± 0.88	-0.32	-1.24	-0.42	-0.93	-1.09	-0.44	-0.72 ± 0.34	-1.07	-1.04	-0.85	0.77	-0.91
BcellWH2_00968	2.06	2.05	1.99	2.15	1.6	1.97 ± 0.22	1.89	1.84	1.67	1.76	1.7	1.77 ± 0.09	1.88	1.95	1.91	2.08	2.07	1.98 ± 0.09	1.55	2.17	2.27	2.23	2.17	2.08 ± 0.3	1.94	2.03	1.89	2.77	1.84	2.09 ± 0.39	1.54	1.65	1.52	1.47	1.75	1.51	1.56 ± 0.13	1.79	1.35	1.72	1.65	1.7	1.7	1.69 ± 0.03	1.89	1.99	1.78	1.73	1.55
BcellWH2_00971	-	-	-	-	-	-	-	-	-	-	-	-	-	-	-	-	-	-	-	-	-	-	-	-	-0.41	-0.43	-0.86	-1.19	-0.79	-0.74 ± 0.33	-0.81	-0.85	0.33	-1.14	-1.15	-1.23	-0.8 ± 0.75	-0.88	-0.91	-0.8	-0.68	0.27	-0.65	-0.47 ± 0.49	-0.77	-0.89	-0.7	-0.92	-0.79
BcellWH2_00985	-	-	-	-	-	-	-	-	-	-	-	-	-	-	-	-	-	-	-	-	-	-	-	-	-1	-0.92	-0.65	-0.84	-0.81	-0.84 ± 0.13	-0.89	-0.92	-0.72	-0.34	-1.2	-0.85	-0.78 ± 0.35	-0.68	-0.78	-0.62	-0.98	-1.13	-0.24	-0.74 ± 0.39	-0.93	-0.48	-0.87	-0.26	-1.02
BcellWH2_01002	0.87	0.52	0.31	0.48	1.33	0.7 ± 0.41	1.41	0.96	1.13	1.13	1.13	1.15 ± 0.16	1.09	0.92	1.09	1.39	0.88	1.08 ± 0.2	0.28	1.39	0.19	0.36	0.81	0.61 ± 0.5	0.93	1.81	0.27	0.8	1.31	1.03 ± 0.58	1.08	1.6	1.11	1.55	1.55	1.27	1.37 ± 0.22	1.43	0.52	1.46	1.22	0.53	1.12	1.08 ± 0.4	1.24	-0.7	1.53	0.92	1.1
BcellWH2_01003	-0.54	-0.05	0.56	0.73	0.87	0.31 ± 0.59	0.54	0.75	0.59	0.24	0.56	0.54 ± 0.19	0.85	0.92	0.41	0.56	0.57	0.66 ± 0.22	1.25	0.39	0.83	0.29	-0.8	0.39 ± 0.77	-0.03	0.93	0.18	-0.57	0.7	0.24 ± 0.6	0.46	1.25	0.57	0.83	0.5	1.01	0.73 ± 0.23	0.51	0.44	1.26	0.74	0.22	1.08	0.82 ± 0.46	-1.03	-1.33	0.81	1.04	0.78
BcellWH2_01006	-	-	-	-	-	-	-	-	-	-	-	-	-	-	-	-	-	-	-	-	-	-	-	-	-0.2	-0.66	-0.27	-0.9	-1.05	-0.61 ± 0.38	-0.73	-0.64	-0.66	0.45	-0.62	-0.25	-0.27 ± 0.52	-0.83	-1.18	-0.71	0.22	-0.93	-0.73	-0.54 ± 0.52	-0.66	-0.34	-0.53	-0.81	-0.65
BcellWH2_01008	1.4	1.14	1.01	1.01	1.13	1.14 ± 0.16	1	0.79	0.72	0.92	0.88	0.86 ± 0.11	0.84	0.7	0.49	0.86	0.67	0.71 ± 0.15	1.16	1.23	1.04	1.17	1.05	1.13 ± 0.08	1.08	1.2	1.42	1.48	1.51	1.34 ± 0.19	0.82	0.87	1.04	1.12	1.19	1	1.09 ± 0.09	1.18	1.29	1.01	1.35	1.36	1.2	1.23 ± 0.17	1.43	1.28	1.34	1.43	1.43
BcellWH2_01028	0.3	-0.22	0.91	0.21	-0.31	0.18 ± 0.49	-0.34	-0.33	-0.61	-0.67	-0.18	-0.43 ± 0.21	0.77	-1.28	-1.14	0.12	-0.45	-0.39 ± 0.86	0.21	-1.12	0.76	0.23	-1.1	-0.21 ± 0.85	-0.95	-0.49	-1.06	0.16	0.41	-0.38 ± 0.66	-0.32	0.84	-0.68	-0.47	0.49	-0.27	-0.23 ± 0.51	-0.07	0.12	0.02	-0.2	-1.54	0.48	-0.31 ± 0.87	0.34	-0.75	-0.38	-0.05	-0.97
BcellWH2_01031	-0.43	-0.04	-0.23	0.37	-0.78	-0.22 ± 0.43	-1.68	-0.41	-0.56	-0.42	-2.12	-1.04 ± 0.8	-0.38	-0.02	-1.01	-0.98	-0.6	-0.6 ± 0.42	-0.73	-0.76	-0.44	-0.22	-0.58	-0.54 ± 0.22	-0.7	-0.38	-0.56	0.91	-0.44	-0.23 ± 0.65	-1.45	-0.31	-0.56	-0.29	-0.33	-0.32	-0.37 ± 0.12	0.14	-0.02	0.07	-0.42	0.09	-1.01	-0.32 ± 0.52	0.16	-1.27	-1.32	-1.04	0.38
BcellWH2_01032	-	-	-	-	-	-	-	-	-	-	-	-	-	-	-	-	-	-	-	-	-	-	-	-	-1.2	-1.56	-0.86	-0.9	-0.82	-1.07 ± 0.31	-0.75	-0.29	-1.18	-0.32	-0.9	-0.66	-0.77 ± 0.36	-1	-0.72	-0.4	-0.78	-0.79	-1.04	-0.75 ± 0.26	-0.69	-1.14	-1.39	-1.11	-0.93
BcellWH2_01038	-	-	-	-	-	-	-	-	-	-	-	-	-	-	-	-	-	-	-	-	-	-	-	-	-0.96	0.09	-1.14	-0.35	-0.49	-0.57 ± 0.49	-0.74	-0.99	-1.27	-1.17	-0.91	-0.88	-1.06 ± 0.19	-0.57	-0.82	-0.86	0.41	-0.77	-0.77	-0.5 ± 0.6	-0.63	-1.11	-0.54	-0.8	-0.42
BcellWH2_01039	-	-	-	-	-	-	-	-	-	-	-	-	-	-	-	-	-	-	-	-	-	-	-	-	-1.21	-0.93	-0.85	-1.15	-0.61	-0.95 ± 0.24	-0.62	-0.71	-0.6	-1.09	-0.88	-0.9	-0.87 ± 0.2	-1.19	-0.66	-0.9	-0.91	-0.47	-0.77	-0.76 ± 0.21	-1.07	-0.04	-0.37	-0.91	-1.21
BcellWH2_01040	-0.76	0.98	0.49	0.95	0.77	0.48 ± 0.72	0.47	0.15	0.49	0.36	0.53	0.4 ± 0.15	0.37	0.26	0.57	0.66	0.43	0.46 ± 0.16	-0.71	0.78	0.47	0.32	0.63	0.3 ± 0.59	1.68	0.19	0.42	1.39	1.06	0.95 ± 0.63	0.74	0.82	0.9	0.82	0.74	0.93	0.85 ± 0.08	0.34	1.12	0.03	1.04	1.04	1.02	0.78 ± 0.5	1	1.06	0.94	1.06	1.17
BcellWH2_01041	-0.68	-0.93	0.94	0.53	-1.19	-0.27 ± 0.94	-0.9	0.91	-1.09	-1.34	-0.9	-0.66 ± 0.9	-0.92	-1.22	-0.99	-1.16	-1.1	-1.08 ± 0.12	-0.53	-0.72	-0.75	-0.85	-1.22	-0.81 ± 0.25	-0.47	-0.51	0.43	-0.06	0.59	0 ± 0.51	-1.34	-0.59	-1.2	-1.8	-1.04	-1.19	-1.31 ± 0.34	-0.52	-1.05	-0.46	0.03	-0.76	-0.81	-0.5 ± 0.39	0.37	0.42	0.22	0.51	-1.2
BcellWH2_01046	-	-	-	-	-	-	-	-	-	-	-	-	-	-	-	-	-	-	-	-	-	-	-	-	-0.59	-0.72	0.27	-0.49	-0.85	-0.48 ± 0.44	-0.58	-0.74	-0.32	-0.96	-0.59	-0.71	-0.65 ± 0.27	-0.66	-1.12	-1.31	-1.06	-0.96	1.18	-0.54 ± 1.15	-0.47	-1.02	-0.46	-0.4	-0.59
BcellWH2_01052	-	-	-	-	-	-	-	-	-	-	-	-	-	-	-	-	-	-	-	-	-	-	-	-	-1.01	-0.75	-0.45	-0.21	-1.36	-0.76 ± 0.45	-1.19	-0.77	-1.4	-0.29	-1.13	-0.83	-0.91 ± 0.48	-0.16	0.31	-0.68	0.11	-0.34	-0.04	-0.24 ± 0.35	0.26	0.26	-1.16	-0.01	0.39
BcellWH2_01056	-0.84	-0.95	-1.16	-1.17	-0.11	-0.85 ± 0.44	-0.3	-0.16	-1.14	-0.8	-1.22	-0.73 ± 0.48	-0.63	-1.2	-0.66	-0.96	-0.94	-0.88 ± 0.24	-1.37	-0.84	-0.01	-1.14	-0.82	-0.84 ± 0.52	-0.78	-0.45	-0.76	-0.81	-0.16	-0.59 ± 0.28	-0.86	0.38	-0.84	-0.71	-1.16	-0.91	-0.9 ± 0.19	-1.15	-0.85	-0.69	-0.85	-0.76	-1.16	-0.86 ± 0.21	-1.16	-0.44	-1.14	-0.64	-0.92
BcellWH2_01058	-0.04	0.23	-0.56	-1.37	2.05	0.06 ± 1.27	0.42	-1.77	-1.75	0.13	0.29	-0.54 ± 1.12	0.07	0.82	0.73	0.16	1.23	0.6 ± 0.48	1.67	-0.77	-0.76	0.99	-1.07	0.01 ± 1.23	-0.36	-0.83	0	1.03	0.86	0.14 ± 0.79	0.5	0.66	1.03	0.7	0.48	0.53	0.68 ± 0.25	1.33	1.07	0.49	0.95	1.05	0.62	0.78 ± 0.27	-1.22	1.04	0.81	0.67	1.06
BcellWH2_01060	-	-	-	-	-	-	-	-	-	-	-	-	-	-	-	-	-	-	-	-	-	-	-	-	-0.59	-0.64	-1.23	-1.11	-0.22	-0.76 ± 0.41	-0.7	-0.38	-1.28	-0.53	-0.68	-0.94	-0.86 ± 0.33	-1.02	-0.69	-1.31	-1.11	-0.72	-0.75	-0.97 ± 0.29	-1.27	-1.28	-0.99	-0.61	-0.89
BcellWH2_01065	0.95	0.64	0.23	-1.61	0.19	0.08 ± 1	0.59	0.61	-0.27	-0.12	0.35	0.23 ± 0.41	-1.21	-0.01	0.06	0.31	0.61	-0.05 ± 0.69	1.06	0.46	0.84	0.39	0.7	0.69 ± 0.28	-0.05	0.45	0.31	0.03	0.69	0.28 ± 0.3	0.66	0.39	1.07	0.78	0.46	0.11	0.61 ± 0.41	1.1	0.78	0.27	0.95	0.84	0.66	0.68 ± 0.3	0.11	0.24	-0.23	0.3	0.98
BcellWH2_01074	-	-	-	-	-	-	-	-	-	-	-	-	-	-	-	-	-	-	-	-	-	-	-	-	0.08	-1.03	-0.86	-0.75	-0.74	-0.66 ± 0.43	-0.71	-0.81	-1.08	-0.96	-0.88	-1.02	-0.99 ± 0.08	-0.7	-0.85	-0.85	-0.77	-0.79	-0.88	-0.82 ± 0.05	-1.27	-0.71	-0.81	-1.13	-0.82
BcellWH2_01075	-	-	-	-	-	-	-	-	-	-	-	-	-	-	-	-	-	-	-	-	-	-	-	-	-1.54	-1.41	-1.12	-0.97	-1.29	-1.27 ± 0.23	-0.76	-0.72	0.49	-0.9	-0.24	-0.87	-0.38 ± 0.66	-1.21	-0.86	-1.09	-0.85	-0.69	-0.79	-0.86 ± 0.17	-1.03	-1.26	-0.53	-0.48	-1.04
BcellWH2_01103	-1.26	-1.57	-0.78	-0.88	-0.92	-1.08 ± 0.33	-0.68	-0.88	-0.66	-1.65	-0.68	-0.91 ± 0.42	-0.2	-0.92	-0.56	-0.81	-0.95	-0.69 ± 0.32	-0.31	-0.74	-1.02	-0.73	-0.61	-0.68 ± 0.26	-	-	-	-	-	-	-	-	-	-	-	-	-	-	-	-	-	-	-	-	-	-	-	-	-
BcellWH2_01131	-	-	-	-	-	-	-	-	-	-	-	-	-	-	-	-	-	-	-	-	-	-	-	-	0.67	-0.53	-0.18	0.49	0.62	0.21 ± 0.54	0.33	-1.01	-1.63	0.08	-0.98	-1.17	-0.93 ± 0.72	-0.47	0.56	-0.05	0.2	-1.08	-1.01	-0.48 ± 0.66	-1.26	-0.53	-1.24	-1	-0.73
BcellWH2_01134	-0.43	-0.63	1.37	0.77	0.91	0.4 ± 0.88	0.28	0.57	0.73	0.6	0.36	0.51 ± 0.18	0.79	0.27	0.94	-0.32	0.93	0.52 ± 0.55	-0.44	0.18	1.2	0.52	0.18	0.33 ± 0.6	1.31	1.41	1.42	1.28	0.99	1.28 ± 0.17	1.57	0.53	1.45	1.65	1.55	1.4	1.51 ± 0.11	1.2	1.67	1.16	1.52	1.28	1.49	1.36 ± 0.17	1.33	1.36	1.07	1.05	1.57
BcellWH2_01135	-0.76	-0.62	-0.89	-0.97	-0.74	-0.8 ± 0.14	-0.29	-0.82	-1.01	-1.1	-0.87	-0.82 ± 0.32	-1.02	-1.07	-0.94	-1.1	-0.84	-0.99 ± 0.1	-1.05	-1.06	-0.68	-0.75	-1.01	-0.91 ± 0.18	-	-	-	-	-	-	-	-	-	-	-	-	-	-	-	-	-	-	-	-	-	-	-	-	-
BcellWH2_01136	-1.41	-0.87	-0.9	-1.13	-0.96	-1.05 ± 0.22	-1.46	-0.77	-0.83	-1.05	-1.14	-1.05 ± 0.27	-1.26	-0.63	-1.09	0.53	-0.75	-0.64 ± 0.7	-1	-0.59	-0.35	-0.64	-0.87	-0.69 ± 0.25	-	-	-	-	-	-	-	-	-	-	-	-	-	-	-	-	-	-	-	-	-	-	-	-	-
BcellWH2_01137	1.72	0.8	0.89	1.33	0.71	1.09 ± 0.43	1.18	0.65	1.08	1.07	0.99	1 ± 0.2	0.32	0.76	1.37	1.21	0.63	0.86 ± 0.43	1.29	1.47	1.2	1.17	0.7	1.17 ± 0.29	1.89	1.68	1.87	1.41	1.91	1.75 ± 0.21	1.53	1.53	1.5	1.59	1.6	1.8	1.63 ± 0.13	1.21	2.03	1.83	1.97	2.09	1.93	1.96 ± 0.11	2.02	2.24	1.98	1.85	1.97
BcellWH2_01138	1.52	1.62	2.06	1.9	2.74	1.97 ± 0.48	2.62	1.6	1.97	1.96	1.62	1.95 ± 0.41	1.44	1.77	1.7	1.92	1.68	1.7 ± 0.17	1.44	1.91	1.76	1.86	1.92	1.77 ± 0.2	1.53	1.1	1.39	1.91	1.59	1.51 ± 0.29	1.06	0.79	1.01	1.18	1.19	1.26	1.16 ± 0.1	1.38	1.64	1.56	1.3	1.03	0.95	1.21 ± 0.28	1.53	1.48	1.47	1.57	1.22
BcellWH2_01142	-0.95	0.43	-0.72	-1.02	-1.04	-0.66 ± 0.62	0.08	-0.91	-0.73	-1.36	-0.89	-0.76 ± 0.53	-1.27	-0.92	-1.09	-0.97	-0.27	-0.91 ± 0.38	-1.16	-1.24	-1.15	-1.08	-0.95	-1.12 ± 0.11	-0.95	-0.89	-1.12	-0.66	-0.68	-0.86 ± 0.19	-0.95	0.27	0.33	0.07	0.12	-0.51	0 ± 0.36	-0.65	-0.38	-0.8	-0.15	-1.06	-1.1	-0.78 ± 0.44	-0.54	-0.62	-0.81	-1.12	-0.71
BcellWH2_01143	-	-	-	-	-	-	-	-	-	-	-	-	-	-	-	-	-	-	-	-	-	-	-	-	-0.88	-0.9	-1.26	-0.4	0.29	-0.63 ± 0.6	0.12	-1.46	0.45	0.43	0.08	-0.06	0.23 ± 0.25	0.53	0.78	0.37	0.52	0.56	0.67	0.53 ± 0.12	0.44	0.43	0.13	0.47	1.04
BcellWH2_01144	0.63	1.25	-0.93	0.68	1.15	0.56 ± 0.87	0.75	0.26	0.36	0.89	0.69	0.59 ± 0.27	0.02	-0.02	0.31	-1.78	-1.12	-0.52 ± 0.89	0.78	0.72	0.6	1.32	-1.1	0.46 ± 0.92	-1.24	0.42	-0.33	0.93	-0.28	-0.1 ± 0.82	-0.01	-0.59	0.22	0.18	0.57	-0.35	0.16 ± 0.38	-0.49	0.75	0.58	0.24	0.44	0.52	0.45 ± 0.15	0.07	0.45	0.07	0.08	0.45
BcellWH2_01145	-	-	-	-	-	-	-	-	-	-	-	-	-	-	-	-	-	-	-	-	-	-	-	-	-1.43	-0.53	-1.26	-0.72	-0.13	-0.81 ± 0.53	-1.04	-0.65	-1.83	-1.11	-0.63	-1.61	-1.3 ± 0.54	-1.09	0.52	-1.14	-1.45	-1.1	-0.77	-1.11 ± 0.28	-0.34	0.96	-1.13	-0.96	-0.93
BcellWH2_01150	-0.96	-0.84	-0.32	-0.65	-1.29	-0.81 ± 0.36	-0.43	-0.46	-0.91	-0.94	-1.55	-0.86 ± 0.46	-0.99	-0.68	-0.72	-0.74	-0.83	-0.79 ± 0.12	-1.2	-0.79	-1.02	-0.95	-0.82	-0.96 ± 0.17	-1.1	-1.02	-1.09	-1.21	-1.21	-1.13 ± 0.08	-0.87	-0.7	-1.13	-1.1	-0.35	-0.71	-0.82 ± 0.37	-1.08	-0.53	-0.82	-0.82	-0.76	-0.72	-0.78 ± 0.05	-0.72	-0.36	-0.92	-0.94	-0.87
BcellWH2_01155	1.14	0.63	-0.23	-0.27	-1.17	0.02 ± 0.89	1.05	0.34	1.16	1.15	1.11	0.96 ± 0.35	1.75	1.21	1.21	1	1.16	1.27 ± 0.28	1.84	0.58	0.47	0.64	0.77	0.86 ± 0.56	-0.37	-0.02	-0.69	-0.39	-0.34	-0.36 ± 0.24	1.34	0.75	-0.6	1.21	1	0.9	0.63 ± 0.83	0.65	-0.03	0.66	0.57	0.07	0.74	0.51 ± 0.3	-1.53	0.07	-0.16	-0.26	0.39
BcellWH2_01159	-	-	-	-	-	-	-	-	-	-	-	-	-	-	-	-	-	-	-	-	-	-	-	-	0.65	0.47	0.55	-0.7	0.16	0.22 ± 0.55	0.27	0.27	-0.01	-2.08	0.12	0.1	-0.47 ± 1.08	-0.43	0.02	-0.89	-0.49	-0.1	-0.05	-0.38 ± 0.39	0.32	0.22	0.14	-0.12	-1.15
BcellWH2_01215	1.8	0.76	0.27	0.21	-0.63	0.48 ± 0.89	0.12	-0.49	-0.28	-0.12	-0.08	-0.17 ± 0.23	-1.23	-1.55	0.32	0.46	-0.06	-0.41 ± 0.92	0.26	0.49	-0.43	0.55	-1.04	-0.03 ± 0.69	0.82	0.85	0.72	0.9	0.65	0.79 ± 0.1	-0.46	0.54	0.7	0.29	0.08	-0.08	0.25 ± 0.34	0.65	0.45	0.06	0.61	0.43	0.31	0.35 ± 0.23	0.6	0.44	0.33	0.5	0.56
BcellWH2_01217	0.69	1.17	1.17	0.46	-0.02	0.69 ± 0.5	0.75	0.95	0.88	0.84	0.68	0.82 ± 0.1	0.99	0.39	1.18	1.03	0.47	0.81 ± 0.36	-0.86	0.4	0.73	1.55	1.47	0.66 ± 0.98	1.33	1.36	1.51	0.19	1.3	1.14 ± 0.54	1.1	1.14	1.08	1.03	1.01	0.83	0.99 ± 0.11	1.4	1.26	0.92	0.79	0.41	0.9	0.75 ± 0.24	1.08	0.53	1.01	1.03	1.42
BcellWH2_01266	1.09	0.76	0.28	0.87	0.59	0.72 ± 0.3	0.9	0.65	0.35	0.67	0.73	0.66 ± 0.2	0.85	0.41	0.26	0.69	0.17	0.48 ± 0.29	0.15	0.34	0.78	0.77	0.5	0.51 ± 0.27	0.81	0.84	1.14	1.33	1.19	1.06 ± 0.23	1.06	0.52	1.4	1.13	0.99	0.7	1.05 ± 0.29	1.21	1.27	0.95	1.34	1.4	1.24	1.23 ± 0.2	1.08	1.36	0.91	1.26	1.34
BcellWH2_01272	-0.08	-0.22	0.48	0.24	-0.88	-0.09 ± 0.52	-0.75	-0.42	-0.72	-0.41	-0.53	-0.56 ± 0.16	-0.15	-0.18	-0.22	-0.79	-0.15	-0.3 ± 0.28	-0.04	0.13	0.33	-0.15	0.38	0.13 ± 0.23	-0.57	-0.62	-0.44	0.56	0.15	-0.18 ± 0.52	-0.75	0.11	-0.3	-0.06	-1	-0.72	-0.52 ± 0.42	-0.39	-1.17	-1.04	-1.43	-0.99	-0.7	-1.04 ± 0.3	0.34	-1.02	-1.07	0.47	-0.52
BcellWH2_01275	-0.63	-1.19	-1.57	-1.03	0.57	-0.77 ± 0.82	0.45	0.14	0.57	-0.05	0.52	0.33 ± 0.27	0.71	0.9	0.4	0.07	0.62	0.54 ± 0.32	1.25	-1.24	0.41	0.49	0.11	0.2 ± 0.91	-0.35	0.18	-0.21	-0.26	-1.12	-0.35 ± 0.47	0.09	-1.12	-1.73	0.48	1.07	-0.43	-0.15 ± 1.22	-0.29	0.37	-0.59	-1.45	0.04	0.66	-0.33 ± 0.9	-0.87	-0.3	-1.08	-1.32	-0.65
BcellWH2_01276	-	-	-	-	-	-	-	-	-	-	-	-	-	-	-	-	-	-	-	-	-	-	-	-	-1.1	-1.15	-0.69	-0.81	-0.69	-0.89 ± 0.22	-0.41	-0.98	-1.01	-0.82	-0.96	-0.94	-0.93 ± 0.08	-0.98	-0.68	-1.27	-0.82	-0.45	-0.95	-0.87 ± 0.34	-1.2	-0.8	-0.89	-0.47	-0.8
BcellWH2_01281	-	-	-	-	-	-	-	-	-	-	-	-	-	-	-	-	-	-	-	-	-	-	-	-	-0.93	-1	-0.07	-0.94	-0.95	-0.78 ± 0.39	-0.8	-0.87	-0.37	-1.05	-1.47	-0.86	-0.94 ± 0.46	-0.99	-1.06	-0.54	0.2	-1.05	-0.72	-0.53 ± 0.53	-0.82	-0.98	-0.7	-0.94	-0.65
BcellWH2_01284	1.04	0.76	0.45	-1.49	0.57	0.27 ± 1.01	0.3	0.51	0.46	0.6	0.48	0.47 ± 0.11	0.67	0.46	0.55	0.68	0.37	0.55 ± 0.13	0.85	0.51	0.46	0.78	0.91	0.7 ± 0.2	0.74	-1.19	0.83	-0.67	0.65	0.07 ± 0.93	0.56	0.19	0.4	0.29	0.48	0.55	0.43 ± 0.11	0.92	-1.55	0.61	0.31	0.54	0.53	0.5 ± 0.13	0.78	1.04	0.41	0.33	-1.14
BcellWH2_01287	-0.27	-0.41	0.44	0.12	-0.9	-0.2 ± 0.51	-0.35	-0.99	-0.45	-0.22	-0.54	-0.51 ± 0.3	0.09	-0.29	0.29	0.22	-0.89	-0.12 ± 0.49	-0.66	0.17	-0.36	0	-0.81	-0.33 ± 0.42	-0.25	-1.46	0.88	1.35	0.62	0.23 ± 1.11	0.89	-1.57	0.86	0.78	0.11	1.27	0.76 ± 0.48	-0.52	0.8	-0.06	0.68	0.8	0.81	0.56 ± 0.42	0.58	0.93	-0.3	0.68	0.94
BcellWH2_01288	1.74	2.15	2.21	2.19	2	2.06 ± 0.19	1.97	2.04	2.04	2.05	2.06	2.03 ± 0.04	2.11	2.08	2.09	2.29	2.31	2.18 ± 0.11	2.04	2.41	2.29	2.27	2.26	2.25 ± 0.13	2.29	2.45	2.36	2.49	2.34	2.39 ± 0.08	2.24	2.1	2.14	2.11	2.15	2.09	2.12 ± 0.03	2.17	2.07	2.28	2.2	2.33	2.37	2.3 ± 0.07	2.41	2.15	2	2.06	2.3
BcellWH2_01289	1.75	1.46	1.3	1.6	1.53	1.53 ± 0.16	1.45	1.21	1.32	1.38	1.4	1.35 ± 0.09	1.41	0.94	1.44	1.56	1.61	1.39 ± 0.26	0.81	1.48	1.4	1.42	1.24	1.27 ± 0.27	1.58	1.76	1.52	-0.54	1.41	1.15 ± 0.95	1.39	1.85	1.71	1.73	1.73	1.66	1.71 ± 0.03	1.98	1.49	1.79	1.76	1.83	1.88	1.82 ± 0.05	1.75	1.66	1.49	1.53	1.76
BcellWH2_01290	2.21	2.25	2.68	2.56	2.53	2.44 ± 0.21	2.25	2.56	2.39	2.51	2.49	2.44 ± 0.12	2.46	2.38	2.56	2.65	2.75	2.56 ± 0.15	2.46	2.49	2.74	2.75	2.76	2.64 ± 0.15	2.68	2.76	2.77	2.58	2.69	2.7 ± 0.08	2.77	2.45	2.43	2.53	2.55	2.52	2.51 ± 0.06	2.54	2.54	2.71	2.61	2.8	2.81	2.73 ± 0.09	2.76	2.69	2.58	2.73	2.66
BcellWH2_01291	2.75	2.96	3.04	3.13	3.11	3 ± 0.15	2.78	2.93	2.97	3	3.01	2.94 ± 0.09	3.03	2.86	3	3.04	3.12	3.01 ± 0.1	2.7	2.98	3.2	3.11	3.17	3.03 ± 0.2	3.04	3.04	3.27	3.07	3.19	3.12 ± 0.1	3.08	2.86	2.95	2.92	2.86	2.9	2.91 ± 0.04	3	3.04	3.05	3.01	3.07	3.23	3.09 ± 0.1	3.01	2.95	2.86	3.06	2.98
BcellWH2_01292	-0.75	-1	-0.86	-1.15	-0.64	-0.88 ± 0.2	-1.07	0.41	-1.41	0.1	-1.47	-0.69 ± 0.88	0.27	-1	-1.13	-1.02	-1.07	-0.79 ± 0.59	-0.72	-0.66	-0.26	-0.91	-1.02	-0.71 ± 0.29	-0.7	-0.14	-0.48	-0.89	0.43	-0.36 ± 0.52	-0.69	-0.71	-1.2	-0.02	-1.22	-1.05	-0.87 ± 0.58	-0.69	-0.96	-0.93	-0.34	-0.66	-1.45	-0.84 ± 0.47	-1.33	-0.68	-0.96	-1.1	-0.22
BcellWH2_01293	-0.47	-0.99	-0.71	-0.84	-0.39	-0.68 ± 0.25	0.23	-1.39	-1.36	-0.07	-0.1	-0.54 ± 0.77	-0.89	-1.25	-0.72	-0.02	-0.37	-0.65 ± 0.47	-0.42	0.42	-0.18	-0.16	-1.05	-0.28 ± 0.53	-0.35	-0.14	0.95	-0.75	-1.02	-0.26 ± 0.76	-1.27	-1.14	0.09	-1.74	-0.16	0.12	-0.42 ± 0.89	0.13	0.21	-1.11	-0.16	-0.17	-0.93	-0.59 ± 0.5	-1.18	-0.92	0	-0.96	0.23
BcellWH2_01294	-0.63	-1.31	-1.32	-0.8	-0.5	-0.91 ± 0.38	-0.09	-0.2	-0.36	-1.28	-0.41	-0.47 ± 0.47	-0.62	-0.92	-0.91	-0.86	-0.69	-0.8 ± 0.14	-0.47	-0.34	-1.17	-0.86	-1.04	-0.78 ± 0.36	1.04	0.38	0.2	-0.34	-0.01	0.26 ± 0.51	-0.12	-1.11	-1.56	-0.57	-0.35	-0.17	-0.66 ± 0.62	-0.31	0.12	0.15	-0.29	-0.06	0.15	-0.01 ± 0.21	-1.07	-0.66	-1.06	-0.24	0.14
BcellWH2_01300	-	-	-	-	-	-	-	-	-	-	-	-	-	-	-	-	-	-	-	-	-	-	-	-	-0.94	-1.17	-0.76	-1.16	-0.41	-0.89 ± 0.31	-1.35	-1.22	-0.57	-1.08	-0.83	-0.28	-0.69 ± 0.34	-1.34	-1.18	-1.17	-0.58	-0.62	-1.02	-0.85 ± 0.3	-0.47	-1.09	-0.42	-0.74	-1.14
BcellWH2_01307	-0.13	-0.05	0.67	0.56	-0.63	0.08 ± 0.54	-0.38	-0.09	-0.36	-0.17	0.13	-0.17 ± 0.21	-1.23	0.54	-0.96	-0.63	-0.57	-0.57 ± 0.68	-0.77	-1.11	1.06	-0.93	-0.57	-0.46 ± 0.88	0.36	-0.77	0.22	-0.62	0.43	-0.08 ± 0.57	0.43	0.75	0.16	0.52	0.59	0.58	0.46 ± 0.2	-0.3	-0.56	0.83	0.01	-0.51	-1.46	-0.28 ± 0.96	0.35	-1	0.38	0.48	-1.4
BcellWH2_01310	-	-	-	-	-	-	-	-	-	-	-	-	-	-	-	-	-	-	-	-	-	-	-	-	-1.03	-0.66	-1.18	-0.92	-0.61	-0.88 ± 0.24	-0.77	-0.45	-1.06	-0.75	-0.51	-1.21	-0.88 ± 0.31	-0.73	-0.47	-1.02	-1.18	-0.76	-0.22	-0.79 ± 0.42	-0.83	-0.89	-0.75	-0.88	-0.73
BcellWH2_01311	0.08	0.06	-0.95	-0.9	-0.88	-0.52 ± 0.54	-1.26	-0.96	-1	-1.32	-1.25	-1.16 ± 0.17	-0.74	-0.54	-1.05	0.32	-1	-0.6 ± 0.55	-0.77	-0.75	-0.61	-1.3	-0.66	-0.82 ± 0.28	-0.42	-1.18	-0.69	-0.39	-0.84	-0.7 ± 0.33	-0.62	-0.48	-1.27	-1.39	-0.76	-0.87	-1.07 ± 0.31	-0.72	-0.62	-0.41	-0.54	-0.54	-0.69	-0.54 ± 0.11	-1.51	-0.69	-1.16	-0.71	-0.57
BcellWH2_01314	0.56	0.35	0.97	0.73	0.69	0.66 ± 0.23	0.51	0.66	0.33	0.56	0.57	0.53 ± 0.12	-1.21	0.45	0.58	0.27	0.35	0.09 ± 0.73	-0.96	0.6	0.71	0.76	0.65	0.35 ± 0.74	0.96	0.25	0.33	-0.11	0.44	0.38 ± 0.39	0.58	0.72	0.6	0.93	0.34	0.57	0.61 ± 0.25	1.07	0.59	-0.96	0.63	1.02	0.97	0.42 ± 0.93	0.83	0.97	0.68	0.49	0.85
BcellWH2_01315	-	-	-	-	-	-	-	-	-	-	-	-	-	-	-	-	-	-	-	-	-	-	-	-	-0.24	-1.06	-0.67	-0.66	-0.95	-0.72 ± 0.32	-0.94	-0.73	-1.27	-0.28	-0.4	-0.71	-0.66 ± 0.44	-0.57	-1.15	-0.43	-1.04	-0.9	0.09	-0.57 ± 0.51	-0.89	-0.68	0.04	0.12	-0.42
BcellWH2_01319	-	-	-	-	-	-	-	-	-	-	-	-	-	-	-	-	-	-	-	-	-	-	-	-	-0.53	-0.67	-0.82	-0.74	-0.99	-0.75 ± 0.17	-0.81	-0.47	-1.05	-1	-0.97	-1.08	-1.03 ± 0.05	-0.9	-0.72	-1.01	-0.83	-0.27	-0.54	-0.66 ± 0.32	-0.82	-0.45	-1.25	-0.06	-0.64
BcellWH2_01321	1.82	0.48	1.44	1.28	0.07	1.02 ± 0.72	0.56	1.52	1.45	0.56	0.75	0.97 ± 0.48	1.36	1.31	1.4	0.8	1.81	1.34 ± 0.36	2.11	0.7	0.49	0.93	0.86	1.02 ± 0.63	1.24	0.69	0.76	1.45	0.19	0.87 ± 0.49	-0.43	0.62	-0.82	0.08	-0.08	-1.6	-0.6 ± 0.77	0.64	0.36	1.11	-1.75	-0.25	-1.31	-0.55 ± 1.28	0.72	0.57	0.34	-1.6	0.28
BcellWH2_01327	1.69	1.77	1.59	1.72	1.21	1.59 ± 0.22	1.65	1.54	1.73	1.61	1.48	1.6 ± 0.1	1.56	1.59	1.51	1.62	1.3	1.52 ± 0.13	1.54	1.69	1.63	1.58	1.49	1.59 ± 0.08	1.55	1.68	1.73	2.07	1.96	1.8 ± 0.21	1.91	1.7	2.04	1.87	1.75	2.1	1.94 ± 0.16	1.7	1.86	1.86	2.17	1.9	2.1	2.01 ± 0.15	1.98	1.72	2.03	1.89	1.97
BcellWH2_01331	1.67	1.92	1.74	1.59	1.75	1.73 ± 0.12	2.14	1.99	1.68	1.93	1.85	1.92 ± 0.17	1.93	1.31	2.14	2.08	1.82	1.85 ± 0.33	2.01	1.84	2.07	2.2	2.46	2.12 ± 0.23	2.38	2.41	2.21	1.89	2.27	2.23 ± 0.21	2.27	2.33	2.31	2.18	2.15	1.7	2.08 ± 0.27	2.37	2.06	1.74	2.33	2.15	2.25	2.12 ± 0.26	2.2	2.47	2.24	2.23	2.34
BcellWH2_01332	1.02	0.58	0.9	0.05	0.01	0.51 ± 0.47	0.94	0.48	0.58	0.54	0.3	0.57 ± 0.24	0.52	0.5	0.93	0.78	0.9	0.73 ± 0.2	0.92	0.82	0.41	0.07	0.66	0.58 ± 0.34	0.59	1.14	0.85	1.07	0.51	0.83 ± 0.28	0.47	0.99	1.05	0.78	0.29	0.02	0.53 ± 0.47	0.74	0.34	0.92	0.68	0.76	0.37	0.68 ± 0.23	0.26	0	0.8	0.63	1.02
BcellWH2_01335	-	-	-	-	-	-	-	-	-	-	-	-	-	-	-	-	-	-	-	-	-	-	-	-	-0.64	-1.22	-0.77	-1.63	-0.74	-1 ± 0.42	-0.84	-1.18	-0.96	-1.43	-1.07	-0.81	-1.07 ± 0.27	-0.71	-0.41	-0.85	-1.27	-0.72	-0.07	-0.73 ± 0.5	-1.18	-0.59	-0.71	0.13	-0.81
BcellWH2_01338	-0.49	0.31	-1.45	-0.08	-0.05	-0.35 ± 0.68	-0.63	-0.13	-0.1	-0.37	-0.69	-0.38 ± 0.27	0.09	-1.2	-1.39	-0.65	-0.51	-0.73 ± 0.59	-0.75	-1.07	-0.65	-0.56	0.37	-0.53 ± 0.54	1.21	0.46	-1.11	-0.06	-1.45	-0.19 ± 1.1	1.42	-0.02	-0.85	0.59	-0.96	1.16	-0.02 ± 1.05	-0.25	-0.97	-0.2	-0.86	-0.86	-0.87	-0.7 ± 0.33	-1.17	-0.91	-0.17	0.23	-0.26
BcellWH2_01339	0.62	0.94	0.99	0.25	0.83	0.73 ± 0.3	0.16	0.02	0.51	0.27	0.47	0.29 ± 0.21	0.24	0.27	0.62	0.39	0.35	0.37 ± 0.15	0.46	0.75	0.12	0.42	0.57	0.46 ± 0.23	1.49	1.17	1.33	1.57	1.56	1.42 ± 0.17	1.09	0.25	0.93	1.18	0.8	0.74	0.91 ± 0.19	1.35	1.31	1.41	1.12	1.28	1.11	1.23 ± 0.15	0.89	1.32	1.22	1.2	0.98
BcellWH2_01340	-0.11	-0.43	0.25	-0.65	-1.46	-0.48 ± 0.64	-0.81	-0.08	0.18	-0.44	-0.17	-0.26 ± 0.38	0.53	0.65	-0.73	-1.56	0.65	-0.09 ± 1.01	1.45	-1.16	-0.63	0.52	0.92	0.22 ± 1.09	1.49	-0.45	0.24	1.5	0.21	0.6 ± 0.86	-1.4	-0.11	0.26	-0.98	-0.42	-1.54	-0.67 ± 0.77	-0.04	-0.05	-0.05	0.92	-0.32	0.28	0.21 ± 0.54	0.04	-0.94	0.35	-0.05	-0.52
BcellWH2_01341	1.16	1.07	0.45	0.77	0.63	0.82 ± 0.3	0.59	0.4	0.44	0.38	0.48	0.46 ± 0.08	0.58	0.58	0.7	0.47	0.73	0.61 ± 0.1	-0.77	-0.03	0.48	0.73	0.7	0.22 ± 0.63	1.61	1.81	1.37	1.25	1.03	1.41 ± 0.31	1.23	1.12	1.18	1.06	0.8	0.71	0.94 ± 0.22	1.67	0.95	0.81	0.63	1.28	0.45	0.79 ± 0.36	-0.27	0.47	1	0.26	1.58
BcellWH2_01342	0.18	0.1	0.32	-1.39	0.15	-0.13 ± 0.71	-0.18	-0.41	-0.6	-0.43	-0.49	-0.42 ± 0.15	0.08	-0.51	-0.87	0.19	0.56	-0.11 ± 0.57	-0.12	0.33	-0.47	-0.42	-1.01	-0.34 ± 0.49	-0.6	-0.33	0.39	0.86	0.18	0.1 ± 0.58	0.1	-1.04	0.07	-0.03	-0.2	-1.71	-0.47 ± 0.84	-0.09	0.4	-0.84	0.3	0.16	0.36	0 ± 0.56	0.52	0.52	0.15	0.39	-1.18
BcellWH2_01344	1.78	0.45	1.06	1.52	0.97	1.15 ± 0.51	0.23	0.81	0.75	0.29	0.48	0.51 ± 0.26	0.44	-0.25	0.99	0.39	1.23	0.56 ± 0.58	-0.46	0.18	0.17	0.69	-1.05	-0.1 ± 0.67	1.44	1.26	0.98	1.29	1.72	1.34 ± 0.27	0.92	0.79	0.94	0.78	1.21	0.83	0.94 ± 0.19	1.21	1.23	1.37	1.13	1.18	1.63	1.33 ± 0.22	1.31	1.28	1.68	1.19	1.15
BcellWH2_01352	-0.7	0.5	1.16	0.96	1.27	0.64 ± 0.8	0.4	0.39	0.12	0.3	-0.01	0.24 ± 0.18	0.01	-0.28	-1.54	0.37	-0.18	-0.33 ± 0.72	-0.43	0.3	0.18	0.19	0.66	0.18 ± 0.39	0.82	0.74	0.74	-0.15	0.9	0.61 ± 0.43	0.96	1.13	1.06	1.18	1.12	0.83	1.05 ± 0.15	0.65	0.85	0.23	1.32	0.71	0.66	0.73 ± 0.45	0.46	0.58	0.65	1.25	1.1
BcellWH2_01353	-0.29	0.86	-0.08	0.02	-0.01	0.1 ± 0.44	-0.26	0.61	0.01	0.04	-0.54	-0.03 ± 0.43	-0.17	-0.97	-0.84	-0.23	-0.81	-0.6 ± 0.37	0.08	-0.66	-0.09	-0.96	-0.76	-0.48 ± 0.45	0.87	0.98	0.42	-0.29	-0.77	0.24 ± 0.76	-0.39	0.88	0.38	0.41	0.68	0.55	0.51 ± 0.14	0	-1.22	0.37	0.26	-0.38	0.47	0.18 ± 0.38	-1.1	-1.14	0.32	0.09	-1.66
BcellWH2_01357	-	-	-	-	-	-	-	-	-	-	-	-	-	-	-	-	-	-	-	-	-	-	-	-	-0.32	-0.58	-1.02	-0.88	-0.31	-0.62 ± 0.32	-0.92	-0.57	0.12	-0.77	-0.95	-0.88	-0.62 ± 0.5	-0.94	-1.15	-0.53	0.29	-1.25	-0.65	-0.53 ± 0.63	-0.53	-0.85	-0.65	-0.72	-0.6
BcellWH2_01359	1.3	1.3	1.31	1.41	1.37	1.34 ± 0.05	1.49	1.54	1.35	1.55	1.59	1.5 ± 0.09	1.63	1.47	1.63	1.57	1.51	1.56 ± 0.07	1.61	1.45	1	1.46	1.66	1.44 ± 0.26	1.61	1.52	1.44	1.61	1.66	1.57 ± 0.09	1.76	1.72	1.46	1.6	1.56	1.65	1.57 ± 0.08	1.72	1.61	1.52	1.65	1.69	1.79	1.66 ± 0.11	1.88	1.72	1.7	1.78	1.86
BcellWH2_01364	-1.24	0.42	0.37	-0.97	-1.29	-0.54 ± 0.86	-0.39	-1.71	-0.33	-1.39	-2.06	-1.17 ± 0.78	-1.14	-1.14	0.31	0.21	0.45	-0.26 ± 0.8	0.22	0.73	-0.45	-0.6	-1.17	-0.25 ± 0.74	-0.9	-0.71	-0.15	-0.21	-1	-0.6 ± 0.39	-1.12	0.17	-0.27	-0.23	-1.42	0.14	-0.45 ± 0.67	-0.5	-1.36	0.25	-0.22	-1.28	0.22	-0.26 ± 0.72	-0.04	-0.6	0.21	0.23	-0.4
BcellWH2_01377	-0.57	-1.64	0.59	-1.55	0.56	-0.52 ± 1.09	1.53	-1.51	-1.9	1.44	-0.41	-0.17 ± 1.61	-0.7	-0.96	-0.75	0.42	-0.83	-0.56 ± 0.56	-0.44	-1.18	0.73	-0.71	-0.73	-0.46 ± 0.72	1.44	0.98	0.89	-0.78	0.78	0.66 ± 0.85	0.55	1.68	-1.42	0.37	0.68	0.59	0.05 ± 0.99	-0.35	0.99	0.8	1.07	1.15	0.54	0.89 ± 0.28	-1.5	-0.98	0.54	-1.51	1.07
BcellWH2_01378	0.89	0.25	0.5	-0.41	-0.74	0.1 ± 0.67	0.02	0.23	-1	-0.86	-0.47	-0.41 ± 0.54	-0.35	0.69	0.95	-0.23	1.1	0.43 ± 0.68	-0.18	-0.1	0.32	0.13	0.87	0.21 ± 0.42	0.85	0.85	1.05	-0.79	0.77	0.55 ± 0.75	0.76	-0.15	0.54	0.22	0.61	0.76	0.53 ± 0.23	1.44	0.26	0.66	0.36	1.11	0.79	0.73 ± 0.31	0.31	1.36	1.06	0.85	0.94
BcellWH2_01379	1.1	-0.35	0.85	-0.12	1.04	0.5 ± 0.69	1.02	0.85	1.07	0.99	0.95	0.98 ± 0.08	1	-0.09	1.21	1.13	0.94	0.84 ± 0.53	0.08	1.17	0.87	1.23	0.71	0.81 ± 0.46	1.37	1.17	1.21	0.3	1.18	1.05 ± 0.43	0.75	0.68	1.25	1.16	1.15	1.16	1.18 ± 0.05	0.79	0.79	1.34	0.85	0.97	1.24	1.1 ± 0.23	1.27	0.93	0.93	0.9	1.04
BcellWH2_01381	1.59	1.61	1.63	1.6	1.87	1.66 ± 0.12	1.66	1.69	1.81	1.71	1.61	1.7 ± 0.07	1.55	1.78	1.67	2.02	1.73	1.75 ± 0.17	1.64	1.95	1.4	1.48	1.75	1.64 ± 0.22	0.52	1.67	0.65	1.79	1.03	1.13 ± 0.58	1.49	2.01	1.5	1.13	1.71	1.16	1.38 ± 0.28	1.95	1.43	1.84	1.15	1.31	1.51	1.45 ± 0.3	1.21	1.44	1.9	1.65	1.18
BcellWH2_01393	-0.27	0	0.5	0.63	-0.24	0.12 ± 0.42	0.31	-1.5	0.29	0.39	0.4	-0.02 ± 0.83	0.52	-0.36	-1.01	0.51	0.1	-0.05 ± 0.65	-0.34	-1.39	-0.22	-0.01	0.72	-0.25 ± 0.76	1.02	0.7	0.8	0.78	0.14	0.69 ± 0.33	0.37	0.49	0.26	0.35	0.18	0.4	0.3 ± 0.1	-0.66	0.69	0.38	0.59	0.3	0.82	0.52 ± 0.24	-0.13	-1.14	-0.25	0.2	-0.08
BcellWH2_01395	-1.1	-1.02	-1.12	-1.07	-1	-1.06 ± 0.05	-1.34	0.27	-0.79	0.32	-1.64	-0.64 ± 0.9	-0.77	-0.88	-1.16	-0.71	-1.03	-0.91 ± 0.18	-0.93	-0.85	-1	-0.95	-1.18	-0.98 ± 0.12	0.66	-0.31	0.5	-0.36	0.04	0.11 ± 0.46	-1.63	-0.42	-0.62	-0.95	-1.07	-0.02	-0.66 ± 0.47	0.24	0.21	-0.7	-1.5	-0.25	-1.12	-0.89 ± 0.54	-0.03	-0.03	-0.21	0.02	-0.01
BcellWH2_01397	-	-	-	-	-	-	-	-	-	-	-	-	-	-	-	-	-	-	-	-	-	-	-	-	-0.66	-1.09	-0.74	-0.74	-0.91	-0.83 ± 0.17	-0.74	-0.62	0.01	-0.89	-0.87	-0.9	-0.66 ± 0.45	-1.04	-0.28	-0.97	-1.02	-0.71	-1.09	-0.95 ± 0.17	-0.8	-1.12	-0.89	-0.94	-0.75
BcellWH2_01398	-	-	-	-	-	-	-	-	-	-	-	-	-	-	-	-	-	-	-	-	-	-	-	-	-1.01	-0.66	-0.69	-0.2	-0.36	-0.58 ± 0.32	-0.97	-0.86	-0.55	-0.72	-0.33	-0.67	-0.57 ± 0.18	-0.49	-0.76	-0.77	-1.38	-0.35	-1.11	-0.9 ± 0.44	-0.24	-0.81	-0.76	-0.33	-0.99
BcellWH2_01401	-	-	-	-	-	-	-	-	-	-	-	-	-	-	-	-	-	-	-	-	-	-	-	-	-0.73	-0.5	-1.11	-1.1	-1	-0.89 ± 0.27	-0.6	-0.71	-0.65	-0.52	-0.71	-0.94	-0.7 ± 0.17	-1.32	-1.19	0.18	-0.78	-0.77	-0.8	-0.54 ± 0.48	-0.54	-0.95	-1.01	-0.68	-1.02
BcellWH2_01403	0.03	-1.17	-1.23	-1.22	-1.77	-1.07 ± 0.66	-0.22	0.03	-0.05	-0.26	-0.4	-0.18 ± 0.17	0.13	0.12	0.66	-0.06	0.57	0.28 ± 0.31	-0.31	0.48	-0.23	0.51	0.47	0.18 ± 0.42	-0.17	-0.39	-0.62	0.01	-1.47	-0.53 ± 0.58	0.43	0.04	0.6	0.35	0.29	-1.2	0.01 ± 0.82	-0.54	-0.74	-0.29	0.43	0.34	-1.66	-0.29 ± 0.97	-0.79	-0.54	-1.42	-0.04	0.51
BcellWH2_01407	-	-	-	-	-	-	-	-	-	-	-	-	-	-	-	-	-	-	-	-	-	-	-	-	-0.38	0.06	-0.54	-0.85	-0.05	-0.35 ± 0.37	0.3	-1.38	0.07	-0.05	-0.2	-1.01	-0.3 ± 0.49	-0.38	0.54	-1.22	0.22	-0.01	-1.65	-0.66 ± 0.91	0.48	-0.97	0.38	0.49	0.99
BcellWH2_01408	1.17	0.7	-0.05	0.75	1.14	0.74 ± 0.49	0.86	1.34	1.14	1.31	1.06	1.14 ± 0.19	0.95	1.35	1.48	1.23	1.79	1.36 ± 0.31	1.34	1.19	1.35	1.01	0.83	1.15 ± 0.22	0.58	1.34	1.32	0.56	1.49	1.06 ± 0.45	1.09	1.38	1.37	1.3	1.34	0.97	1.24 ± 0.19	0.84	1.21	0.97	1.26	1.08	1.26	1.14 ± 0.14	1.25	1.04	1.32	1.25	1.34
BcellWH2_01409	-0.95	0.55	1.15	0.9	0.88	0.51 ± 0.84	0.71	0.91	0.88	0.98	0.91	0.88 ± 0.1	0.77	1.29	1.19	0.97	1.14	1.07 ± 0.2	-0.4	0.59	1.06	0.88	1.21	0.67 ± 0.64	0.12	1.16	0.98	1.29	1.03	0.92 ± 0.46	1.22	0.65	1.37	1.3	0.89	1.1	1.16 ± 0.22	0.46	1.06	0.32	1.27	1.02	1.25	0.97 ± 0.45	0.79	1.19	0.89	1.35	1
BcellWH2_01450	-0.57	0.54	0.58	0.63	0.63	0.36 ± 0.52	0.22	0.2	0.36	0.32	0.3	0.28 ± 0.07	0.22	0.17	0.41	0.38	0.19	0.27 ± 0.11	-0.26	0.44	0.38	0.35	0.42	0.27 ± 0.3	0.59	0.72	0.49	0.36	0.76	0.59 ± 0.17	-0.36	0.14	0.87	0.64	0.23	-0.66	0.27 ± 0.67	0.83	0.52	0.42	-0.38	0.48	0.13	0.16 ± 0.39	0.58	-1.35	0.22	-0.19	0.9
BcellWH2_01451	-0.4	-0.52	-0.82	-0.57	-0.98	-0.66 ± 0.24	-1.44	-1.41	-1.33	-0.48	-0.59	-1.05 ± 0.47	-0.35	-1.16	-0.9	-1.02	-0.97	-0.88 ± 0.31	1.17	-0.38	-0.67	-0.69	0.32	-0.05 ± 0.8	-0.79	-0.57	1.03	-0.17	-0.78	-0.26 ± 0.76	-1.52	-1.3	-1.68	-1.89	0.71	0.78	-0.52 ± 1.47	-0.66	0.88	0.82	0.6	0.31	-1.32	0.1 ± 0.97	-1.42	0.63	0.81	-1.3	-1.16
BcellWH2_01456	-0.09	-0.96	-0.61	-0.54	-0.21	-0.48 ± 0.35	0.13	-1.08	-1.67	-1.32	-0.2	-0.83 ± 0.76	-1.28	-0.98	-1.18	0.48	-0.93	-0.78 ± 0.72	-0.81	-0.82	-1.25	0.15	-0.35	-0.61 ± 0.53	-0.51	-0.52	-0.96	-0.43	0.01	-0.48 ± 0.35	-1.19	-0.9	-0.63	-0.68	-0.94	-0.92	-0.79 ± 0.16	-0.39	-0.13	-1.3	-0.39	-0.22	-0.25	-0.54 ± 0.51	-0.06	0.29	-0.42	-0.23	-0.04
BcellWH2_01457	0.49	1.05	1.13	1.04	0.95	0.93 ± 0.26	0.84	0.8	0.73	0.74	0.68	0.76 ± 0.06	0.58	0.67	0.12	0.78	0.66	0.56 ± 0.26	0.4	0.6	0.71	0.75	0.94	0.68 ± 0.2	1.39	1.18	1.52	0.5	1.48	1.21 ± 0.42	1.28	1.43	1.15	1.21	1.22	0.59	1.04 ± 0.3	0.62	0.98	1.39	1.16	1.2	1.35	1.27 ± 0.11	1.38	1.25	1.33	1.28	1.11
BcellWH2_01460	0.36	0.84	1.2	1.29	0.97	0.93 ± 0.37	0.89	1	0.93	0.49	0.62	0.79 ± 0.22	1.1	0.92	-1.07	0.31	-1.38	-0.02 ± 1.14	-0.9	1.14	1.14	0.42	1.34	0.63 ± 0.92	0.9	0.92	1.41	1.81	0.89	1.19 ± 0.41	0.88	-1.13	0.79	0.86	0.84	0.81	0.83 ± 0.03	0.99	0.57	0.98	0.72	0.11	1.09	0.72 ± 0.44	-1.49	0.56	1.02	1.22	1.06
BcellWH2_01461	-	-	-	-	-	-	-	-	-	-	-	-	-	-	-	-	-	-	-	-	-	-	-	-	-0.69	-0.77	-0.53	-0.9	-0.77	-0.73 ± 0.14	-1.02	-1.27	-0.64	0.27	-1.05	-0.28	-0.42 ± 0.56	-0.77	-1.02	-0.81	-1.19	-0.91	-0.65	-0.89 ± 0.23	-0.5	-0.63	-1.15	-0.72	-0.35
BcellWH2_01464	-	-	-	-	-	-	-	-	-	-	-	-	-	-	-	-	-	-	-	-	-	-	-	-	-1.25	-0.77	-0.68	-0.94	0.18	-0.69 ± 0.53	-0.77	0.52	-1.61	-0.97	-0.36	-0.88	-0.96 ± 0.51	-0.63	-0.96	-0.87	-1.15	-1.13	-0.89	-1.01 ± 0.15	-0.55	-0.37	-0.67	-0.68	-0.84
BcellWH2_01466	-1.1	-1.31	-1.15	-0.48	-1.22	-1.05 ± 0.33	-0.27	0.14	0.2	0.08	0.29	0.09 ± 0.21	-1.28	-1.44	-0.62	0.11	-0.47	-0.74 ± 0.63	-0.52	-1.2	0.13	0.24	-0.94	-0.46 ± 0.63	-0.78	-0.59	0.52	-0.47	0.04	-0.26 ± 0.53	0.54	-0.37	0.1	0.25	0.06	0.09	0.13 ± 0.08	0.11	0.42	-0.94	-0.17	0.49	0.69	0.02 ± 0.74	0.24	-0.1	0.52	0.25	-1.02
BcellWH2_01468	-0.28	-1	-0.25	-0.64	-0.01	-0.44 ± 0.39	0.85	1.13	0.3	0.91	0.22	0.68 ± 0.4	0.04	-0.69	-0.15	0.5	-1.26	-0.31 ± 0.68	-0.52	1.37	0.8	1.69	1.15	0.9 ± 0.86	-0.52	0.33	0.73	-0.59	-1.31	-0.27 ± 0.81	0.04	0.26	0.07	-0.42	0.26	-1	-0.27 ± 0.56	0.08	0.76	0.17	0.29	0.3	0.24	0.25 ± 0.06	-1.1	-0.72	-1.35	-1.42	0.15
BcellWH2_01469	-0.01	-0.9	0.68	-0.73	0.29	-0.13 ± 0.67	0.07	0.47	0.1	0.07	0.29	0.2 ± 0.18	0.31	-1.69	-0.74	0.17	-0.01	-0.39 ± 0.83	0.08	-1.14	0	0.4	0.95	0.06 ± 0.76	-0.74	-0.7	0.28	-0.83	-1.22	-0.64 ± 0.56	0.1	0.27	0.08	0.09	-0.17	0.22	0.05 ± 0.16	0.12	-0.15	0.11	-0.04	0.22	0.03	0.08 ± 0.11	0.18	0.17	0.09	0.09	-0.02
BcellWH2_01470	-0.17	0.45	-1.24	-1.54	0.43	-0.41 ± 0.93	0.45	0.36	0.6	0.26	0.34	0.4 ± 0.13	0.18	-1.38	-0.51	0.5	0.52	-0.14 ± 0.81	-0.79	-0.13	0.28	0.17	0.79	0.06 ± 0.58	-1.23	-0.44	-0.84	-0.05	-0.07	-0.53 ± 0.51	-0.12	-0.28	-0.2	-0.66	-0.11	-0.33	-0.33 ± 0.24	-0.46	0.4	0.29	-0.33	-0.04	0.27	0.05 ± 0.29	-0.53	0.37	-0.23	0.03	0.43
BcellWH2_01480	0.44	1.28	0.8	1.17	0.98	0.93 ± 0.33	1.1	0.67	0.93	1.14	1.12	0.99 ± 0.2	0.96	0.67	0.84	0.96	0.86	0.86 ± 0.12	0.62	0.79	0.85	1.28	0.94	0.9 ± 0.24	1.21	1.3	1.51	1.47	1.15	1.33 ± 0.16	1.07	1.13	1.4	1.25	0.91	0.85	1.1 ± 0.26	1.38	1.45	1.31	1.26	1.49	1.2	1.32 ± 0.12	1.06	1.52	1.12	1.35	1.13
BcellWH2_01482	0.03	-1.44	0.37	0.53	0.49	0 ± 0.83	0.06	-0.06	0.31	0.47	0.35	0.23 ± 0.22	0.53	0.69	0.48	0.31	-1.54	0.09 ± 0.92	0.97	0.45	0.83	0.51	0.35	0.62 ± 0.27	-0.79	-1.27	-0.48	0.71	0.59	-0.25 ± 0.87	0.64	0.03	0.62	0.44	0.79	0.47	0.58 ± 0.16	-0.65	0.7	0.56	0.56	0.6	0.66	0.59 ± 0.05	0.92	0.95	0.64	0.88	0.86
BcellWH2_01493	-0.44	0.26	0.43	0.34	0	0.12 ± 0.35	-0.9	-1.32	-0.49	-0.44	-0.47	-0.72 ± 0.38	-0.56	-1.12	-0.79	-1.14	-0.65	-0.85 ± 0.27	-0.57	-0.71	-0.51	-0.7	-0.59	-0.62 ± 0.09	-	-	-	-	-	-	-	-	-	-	-	-	-	-	-	-	-	-	-	-	-	-	-	-	-
BcellWH2_01497	-1.33	-1.21	-1.07	-0.81	0.09	-0.86 ± 0.57	-0.13	-0.12	-1.33	-0.17	-0.22	-0.39 ± 0.52	-1	-1.09	-1.12	-0.81	-0.43	-0.89 ± 0.28	-1.16	-0.81	-0.86	-0.82	-0.83	-0.9 ± 0.15	-0.97	-0.56	-0.62	-1.01	-1.22	-0.88 ± 0.28	-0.67	0.18	0.42	-0.47	-1.15	-1.08	-0.57 ± 0.73	-1.23	-0.66	-0.56	-1.54	-0.98	-0.29	-0.84 ± 0.54	-0.94	-1.1	-0.87	-0.94	-0.98
BcellWH2_01498	-0.73	-0.83	0.2	-0.07	-0.82	-0.45 ± 0.48	0.05	0.04	0.31	-0.04	0.08	0.09 ± 0.13	0.61	-0.02	-0.87	-0.15	-0.89	-0.26 ± 0.63	-0.32	-0.84	-0.18	-0.78	0.07	-0.41 ± 0.39	-0.82	0.14	-0.9	-0.23	0.03	-0.36 ± 0.48	-0.45	0.05	-0.03	0.02	0.18	-0.35	-0.04 ± 0.22	-0.22	-0.76	0.13	-0.17	0.03	0.38	0.09 ± 0.23	0.06	-0.79	-0.18	-0.56	-0.23
BcellWH2_01503	-0.24	-0.28	-0.29	-0.88	1.26	-0.09 ± 0.8	0.18	0.4	0.55	0.1	0.05	0.26 ± 0.21	0.54	-0.2	-0.2	0.74	0.19	0.21 ± 0.42	1.04	0.58	0.38	0.34	1.01	0.67 ± 0.34	0.29	0.5	0.25	0.09	0.26	0.28 ± 0.15	0.38	0.63	0.7	-0.02	0.49	0.44	0.4 ± 0.3	-0.83	0.47	0.23	0.6	-0.2	0.49	0.28 ± 0.36	0.32	0.05	-0.06	0.45	0.1
BcellWH2_01507	-0.95	-0.32	-0.72	-1.08	-0.98	-0.81 ± 0.31	-0.41	-0.79	-0.46	-0.13	-0.93	-0.55 ± 0.32	-0.93	-1	-0.58	-1.21	-0.72	-0.89 ± 0.24	-1.16	-0.69	-0.7	-0.35	-1.24	-0.83 ± 0.37	-	-	-	-	-	-	-	-	-	-	-	-	-	-	-	-	-	-	-	-	-	-	-	-	-
BcellWH2_01509	1.04	-1.02	-0.47	0.79	-0.52	-0.04 ± 0.9	-1.13	-1.17	-0.27	-0.06	-0.79	-0.69 ± 0.5	-1.15	-0.96	-0.2	-0.82	-0.64	-0.75 ± 0.36	-0.55	-0.71	-0.25	-0.61	0.5	-0.32 ± 0.49	-0.48	-0.34	-0.71	1.13	-1.23	-0.32 ± 0.88	-1.01	-0.87	0.51	-1.51	-1.17	-1.72	-0.97 ± 1.01	-0.39	-0.17	-0.81	-0.65	0.27	-0.99	-0.54 ± 0.56	-1.04	-0.78	-0.22	0.02	0.27
BcellWH2_01510	1.48	1.5	1.28	1.44	1.45	1.43 ± 0.09	0.96	0.98	0.83	0.83	0.97	0.91 ± 0.08	0.87	1.27	1.08	1.25	0.83	1.06 ± 0.21	0.96	1.56	0.71	0.87	1.24	1.07 ± 0.34	1.52	1.25	1.17	1.41	1.31	1.33 ± 0.14	1.24	1.05	0.87	0.94	0.95	1.1	0.97 ± 0.1	1.26	1.26	1.09	1.26	0.95	0.94	1.06 ± 0.15	1.2	1.31	1.24	1.21	1.06
BcellWH2_01512	1.77	1.01	0.81	1.01	0.81	1.08 ± 0.4	0.89	0.66	0.91	0.75	0.69	0.78 ± 0.11	0.65	0.88	0.78	0.74	0.87	0.78 ± 0.09	1.37	-1.32	1.19	-0.93	1.14	0.29 ± 1.3	1.2	0.99	0.81	1.54	1.04	1.12 ± 0.28	0.95	0.88	0.87	0.82	0.98	0.6	0.82 ± 0.16	0.96	0.79	0.72	0.77	0.5	0.19	0.55 ± 0.26	0.57	0.56	0.74	0.57	0.38
BcellWH2_01525	-0.57	-1.22	0.3	0.43	0.31	-0.15 ± 0.72	-0.56	0.23	-0.49	-0.98	-1.11	-0.58 ± 0.52	0.48	-1.01	-0.91	-1.31	-1.16	-0.78 ± 0.72	-0.52	-0.75	0.05	-0.97	-0.89	-0.62 ± 0.41	0.45	0.28	0.42	0.61	0.42	0.44 ± 0.12	1.27	0.62	0.27	0.29	0.2	0.24	0.25 ± 0.04	0.82	0.29	0.3	0.2	0.31	0.5	0.33 ± 0.13	0.53	0.66	0.35	0.36	0.45
BcellWH2_01527	1.7	-0.78	-0.81	-0.57	-1.1	-0.31 ± 1.14	-1.41	-1.16	-1.07	-1.16	0.41	-0.88 ± 0.73	-1.05	-0.89	-0.14	-1.49	-0.71	-0.85 ± 0.49	-0.64	-0.21	-1.03	-0.84	-0.65	-0.67 ± 0.3	1.23	0.58	0.9	1.47	0.01	0.84 ± 0.57	0.37	-1.39	0.69	0.63	0.04	0.14	0.38 ± 0.33	0.79	0.52	0.53	0.76	0.29	0.32	0.48 ± 0.22	0.71	0.48	-1.2	0.5	0.66
BcellWH2_01528	1.41	1.27	1.41	1.42	1.31	1.36 ± 0.07	0.88	1.16	0.76	1.04	1.04	0.97 ± 0.16	1.03	0.93	0.59	0.79	1.11	0.89 ± 0.21	1.43	1.19	1.23	1.05	1.19	1.22 ± 0.14	0.48	0.73	1.31	0.53	1.79	0.97 ± 0.57	1.55	1.3	1.41	1.38	1.02	1.22	1.26 ± 0.18	1.64	1.9	1.12	1.56	1.61	1.63	1.48 ± 0.24	1.53	1.24	1.43	1.64	1.74
BcellWH2_01530	1.4	-1.13	0.4	0.91	0.93	0.5 ± 0.98	0.65	1.43	1.46	1.21	1.49	1.25 ± 0.35	2.04	1.77	1.78	1.56	1.73	1.78 ± 0.17	1.99	1.07	1.49	1.25	1.25	1.41 ± 0.36	0.11	-1.23	1.5	2.35	2.08	0.96 ± 1.5	1.65	1.72	1.65	1.51	1.84	1.77	1.69 ± 0.15	1.85	1.76	1.9	1.64	1.79	1.71	1.76 ± 0.11	1.89	1.82	1.86	1.88	1.89
BcellWH2_01534	-0.62	0.75	-1.16	-0.7	0.21	-0.3 ± 0.77	0.05	-0.69	0.07	0.04	-0.09	-0.12 ± 0.32	-1.4	-0.09	-1.01	-1.19	-0.86	-0.91 ± 0.5	-1.01	-0.71	-0.45	-0.25	-0.32	-0.55 ± 0.31	-0.38	1.28	-0.76	1.22	0.74	0.42 ± 0.94	0.57	0.92	-1.08	0.1	-0.31	-1.07	-0.59 ± 0.58	-0.38	-0.89	-0.65	-1.41	-1.6	0.52	-0.79 ± 0.96	-0.88	-0.73	-0.9	-1.61	-1.05
BcellWH2_01535	-1.22	-0.11	0.9	-0.9	-0.79	-0.42 ± 0.84	-1.87	-0.7	-0.48	-0.11	-0.61	-0.75 ± 0.66	-0.95	-1.04	-0.86	0.02	0.47	-0.47 ± 0.67	-1.46	-1.29	-0.97	-0.95	-1.01	-1.13 ± 0.23	-	-	-	-	-	-	-	-	-	-	-	-	-	-	-	-	-	-	-	-	-	-	-	-	-
BcellWH2_01539	-0.53	0.02	0.09	-0.93	0.36	-0.2 ± 0.52	0.02	-0.7	-0.12	-1.33	-2.15	-0.86 ± 0.9	-0.81	-0.43	-0.6	-0.99	-0.88	-0.74 ± 0.22	-0.84	-0.39	-0.83	-0.11	-0.82	-0.6 ± 0.33	-0.29	0.56	-1.12	-0.7	0.02	-0.3 ± 0.65	-0.02	0.43	-1.62	-0.16	-1.25	0.13	-0.73 ± 0.84	-0.53	-1.23	0.82	-1.71	-1.11	0.3	-0.43 ± 1.18	0.66	-0.7	0.43	0.04	-0.95
BcellWH2_01544	-	-	-	-	-	-	-	-	-	-	-	-	-	-	-	-	-	-	-	-	-	-	-	-	0.38	0.6	0.58	0.71	0.47	0.55 ± 0.13	0.13	-0.03	-0.1	-0.02	0.2	0.3	0.09 ± 0.19	0.41	0.24	0.47	0.04	0.12	0.06	0.17 ± 0.2	-0.89	0.8	0.44	0.25	-0.06
BcellWH2_01545	0.4	0.82	0.07	-0.91	-1.23	-0.17 ± 0.87	-1.44	-1.14	0.05	-1.49	-1.43	-1.09 ± 0.65	-0.56	-1.21	-0.6	0.26	-0.59	-0.54 ± 0.53	-0.84	-0.42	-0.88	-1.25	-0.46	-0.77 ± 0.34	0.46	-0.78	0.69	-0.2	-1.02	-0.17 ± 0.75	-0.73	0.28	-0.71	0.14	-1.64	0.28	-0.48 ± 0.89	-0.7	-0.13	0.55	-0.2	0.03	-0.37	0 ± 0.4	-0.38	0.67	-0.49	0.11	-0.02
BcellWH2_01547	-1	0.17	-0.33	0.1	0.34	-0.15 ± 0.54	0.73	0.45	0.87	0.89	0.96	0.78 ± 0.2	1.15	1.04	0.45	0.79	0.54	0.8 ± 0.3	1.47	0.15	-0.98	0.89	0.65	0.44 ± 0.92	0.37	0.33	0.46	0.3	0.66	0.42 ± 0.14	1	0.82	0.75	1.01	1.14	1.14	1.01 ± 0.19	0.42	0.28	0.67	0.86	1.05	0.48	0.76 ± 0.25	0.43	0.04	0.51	0.68	0.19
BcellWH2_01549	-0.87	-0.61	-0.35	-0.86	-0.67	-0.67 ± 0.21	-1.09	-0.17	-0.54	-1.42	-0.89	-0.82 ± 0.49	-0.8	-1.22	-0.69	-0.5	-0.69	-0.78 ± 0.27	-1.06	-0.52	-0.61	-0.89	-0.95	-0.8 ± 0.23	-0.55	-0.93	-0.85	-0.47	-0.84	-0.73 ± 0.21	-1.03	-1.46	0.41	0.05	0.23	-0.45	0.06 ± 0.37	-1.02	-1.14	-0.6	0.26	-0.88	-0.62	-0.46 ± 0.5	-0.73	-0.74	-0.69	-0.92	-0.76
BcellWH2_01551	0.69	-0.03	0.7	-0.77	0.37	0.19 ± 0.61	0.48	-0.4	-0.02	0.38	0.4	0.17 ± 0.37	0.52	-0.27	-0.05	0.69	0.31	0.24 ± 0.4	0.1	-0.54	0.79	0.14	0.79	0.25 ± 0.56	0.62	0.58	0.23	-0.53	0.05	0.19 ± 0.47	0.75	0.08	0.11	0.3	0.54	0.68	0.41 ± 0.25	0.47	-0.01	-0.55	0.03	0.59	0.94	0.25 ± 0.65	0.87	0.78	0.25	0.15	0.27
BcellWH2_01553	-0.49	0.61	-0.96	0.76	0.61	0.11 ± 0.78	0.11	-0.39	0.13	0.07	0.23	0.03 ± 0.24	-1.15	-0.99	-0.88	0.55	-0.65	-0.63 ± 0.68	-0.59	-0.76	-0.54	-0.94	-0.62	-0.69 ± 0.16	0.41	0.97	-0.1	1.41	0.34	0.61 ± 0.59	-0.05	1.18	-1.94	0.23	0.21	0.03	-0.37 ± 1.05	0.22	0.13	0.62	-1.55	0.13	0.14	-0.16 ± 0.95	0.73	-0.77	0.79	-0.94	0.05
BcellWH2_01555	-0.22	0.61	-1.15	-1.12	-0.37	-0.45 ± 0.73	0.16	0.26	-0.7	0.8	-0.26	0.05 ± 0.57	-0.86	-1.27	-1.12	-0.91	-0.66	-0.96 ± 0.24	-0.67	-0.9	-0.49	-0.76	-1.01	-0.77 ± 0.2	-0.82	-0.1	-0.54	-0.1	-1	-0.51 ± 0.41	-1.06	0.58	-0.26	0.04	-0.59	0.58	-0.06 ± 0.5	-0.59	0.11	-0.77	-0.66	-0.3	0.06	-0.42 ± 0.37	-0.98	-0.09	0.6	-1.71	0.02
BcellWH2_01556	0.94	0.74	0.61	-0.06	0.51	0.55 ± 0.38	0.34	0.49	0.23	0.29	0.48	0.37 ± 0.12	0.51	0.07	-1.35	0.34	0.5	0.02 ± 0.78	-0.63	0.39	0.63	0.47	-0.11	0.15 ± 0.51	0.33	0.72	0.64	0.75	0.83	0.66 ± 0.19	1.76	0.72	0.95	1.14	1.42	0.76	1.07 ± 0.28	0.89	0.99	0.95	0.69	1.94	0.8	1.09 ± 0.57	0.72	1.06	0.74	0.8	0.97
BcellWH2_01557	2.19	1.84	1.8	2.06	2.11	2 ± 0.17	2.36	2.18	2.3	2.32	2.15	2.26 ± 0.09	2.07	2.1	2.17	2.2	2.2	2.15 ± 0.06	1.74	2.24	2.12	2.22	2.06	2.07 ± 0.2	2.03	2.15	1.74	1.9	2.17	2 ± 0.18	2.2	2.4	2.19	2.35	2.31	2.28	2.28 ± 0.07	1.95	2.09	2.17	2.14	2.23	2.27	2.2 ± 0.06	2.23	2	2.1	2.11	2.2
BcellWH2_01558	-0.9	0.35	-0.41	-0.77	-0.29	-0.4 ± 0.49	0.29	-1.11	0.54	-1.94	0.18	-0.41 ± 1.07	0.07	0.78	0	-0.26	-0.93	-0.07 ± 0.62	-0.11	-0.83	-0.64	-1.16	-0.74	-0.7 ± 0.38	0.85	0.74	0.8	-0.62	0.89	0.53 ± 0.64	0.92	0.57	0.88	0.87	0.65	0.64	0.76 ± 0.13	0.17	0.81	0.66	0.95	0.83	1.04	0.87 ± 0.16	1.18	1.06	0.94	0.95	1
BcellWH2_01559	-	-	-	-	-	-	-	-	-	-	-	-	-	-	-	-	-	-	-	-	-	-	-	-	-1.14	-0.58	-0.92	-0.95	-1.04	-0.92 ± 0.21	-0.51	-0.49	0.04	-0.92	-0.69	-0.49	-0.52 ± 0.41	-1	-0.62	-1.24	-0.98	-0.39	-0.68	-0.82 ± 0.37	-0.47	-1.24	-0.99	-0.62	-1.08
BcellWH2_01564	-	-	-	-	-	-	-	-	-	-	-	-	-	-	-	-	-	-	-	-	-	-	-	-	-0.62	-0.61	-0.65	-0.7	-0.04	-0.52 ± 0.27	-1.2	-1.27	-0.81	-1.43	-0.96	-0.69	-0.97 ± 0.32	-0.67	0.56	-0.51	-0.09	-0.13	-0.71	-0.36 ± 0.3	-0.19	-0.5	-0.77	-1.07	-0.23
BcellWH2_01565	-0.53	0.41	0.59	-0.75	0.75	0.09 ± 0.69	-0.32	-0.17	-1.58	-0.36	-0.04	-0.49 ± 0.62	0.14	-0.86	-1.66	0.05	0.2	-0.43 ± 0.81	-0.17	-0.34	-0.9	0.46	-0.58	-0.31 ± 0.51	1.24	1.23	1.17	0.41	1.4	1.09 ± 0.39	0.71	0.9	0.4	1.12	0.95	0.97	0.86 ± 0.31	1.21	0.98	1.23	0.78	1	0.98	1 ± 0.18	1.3	1.02	0.94	1.05	1.42
BcellWH2_01567	-	-	-	-	-	-	-	-	-	-	-	-	-	-	-	-	-	-	-	-	-	-	-	-	0.58	-0.82	0.67	0.78	0.72	0.39 ± 0.68	0.52	0.49	0.02	-1.47	0.28	0.44	-0.18 ± 0.87	-0.9	0.74	-0.84	0.07	0.43	0.4	0.01 ± 0.59	0.52	0.25	0.37	0.47	0.79
BcellWH2_01570	-	-	-	-	-	-	-	-	-	-	-	-	-	-	-	-	-	-	-	-	-	-	-	-	-0.53	-0.58	-0.85	-0.64	-0.92	-0.7 ± 0.17	-0.52	-0.95	-0.6	-1.53	-0.8	-1.39	-1.08 ± 0.45	-0.82	-1.29	-0.92	0.36	0.31	-0.6	-0.21 ± 0.65	-0.68	-1.01	-0.56	0.17	-1.51
BcellWH2_01581	-0.23	-1.47	-1.71	-1.19	-1.14	-1.15 ± 0.56	-0.36	-1.63	0.22	-0.13	0	-0.38 ± 0.73	0.77	0.95	1.05	0.3	0.89	0.79 ± 0.29	1.81	0.42	1.23	0.42	-1.02	0.57 ± 1.06	0.82	0.89	0.88	-0.07	-0.89	0.32 ± 0.79	0.51	-1.57	-0.28	0.07	-0.27	0.4	-0.02 ± 0.32	-0.06	-0.22	-0.89	-0.19	0.14	-1.29	-0.56 ± 0.65	-1.37	-0.8	-1.16	-0.79	0.83
BcellWH2_01582	-	-	-	-	-	-	-	-	-	-	-	-	-	-	-	-	-	-	-	-	-	-	-	-	-0.84	-0.56	-1.03	-0.64	0.16	-0.58 ± 0.45	-1.01	-0.91	-1.24	-0.65	-0.55	-0.97	-0.85 ± 0.31	-0.83	-0.24	-0.51	-0.43	-0.45	-0.83	-0.55 ± 0.19	-0.82	-0.58	-0.61	-0.87	0.47
BcellWH2_01583	-	-	-	-	-	-	-	-	-	-	-	-	-	-	-	-	-	-	-	-	-	-	-	-	-0.83	1.24	-0.6	-0.84	-0.12	-0.23 ± 0.87	0.33	1.12	0.46	-0.08	0.68	0.65	0.43 ± 0.35	1.62	-1.51	1.18	-0.28	0.09	0.35	0.34 ± 0.62	0.92	0.68	1.2	-0.1	0.34
BcellWH2_01601	-0.34	0.16	0.24	-0.95	-1.36	-0.45 ± 0.7	-0.33	0.04	-1.71	-0.15	-0.22	-0.47 ± 0.71	-0.78	-1.2	-0.4	0.07	-0.44	-0.55 ± 0.47	-0.46	0.62	-0.4	0.67	0.75	0.24 ± 0.61	-0.11	-0.77	0.55	-0.66	0.55	-0.09 ± 0.63	0.3	-1.76	-0.31	-0.88	-0.9	-1.32	-0.85 ± 0.42	-0.61	0.41	-0.3	0.27	-0.55	0.6	0 ± 0.52	-1.1	-0.57	-0.32	-0.32	0.78
BcellWH2_01612	0.05	0.56	-1.09	0.59	-0.03	0.01 ± 0.68	0.41	0.23	0.35	0.18	0.14	0.26 ± 0.11	0.38	-1.6	0.73	0.49	0.86	0.17 ± 1.01	-0.73	-0.99	-0.66	0.96	-0.87	-0.46 ± 0.8	-0.48	-0.67	-0.46	-0.95	-0.76	-0.66 ± 0.2	-1.57	-1.05	0.62	-0.23	-1.12	-1.08	-0.45 ± 0.83	-0.8	0.33	-0.63	-1.26	-1.1	-0.37	-0.84 ± 0.41	-0.81	-0.73	-0.22	0.17	0.1
BcellWH2_01613	0.53	2.04	1.48	1.2	0.61	1.17 ± 0.62	1.48	0.9	0.64	0.98	1.29	1.06 ± 0.33	0.15	0.2	0.53	1.12	0.69	0.54 ± 0.4	0.32	1.92	0.64	1.14	0.3	0.87 ± 0.68	1.6	1.33	1.26	2.77	1.75	1.74 ± 0.61	1.33	2.19	2.12	1.48	1.09	1.24	1.48 ± 0.45	2.07	1.47	1.33	2.6	2.51	2.66	2.27 ± 0.63	2.61	0.99	1.13	1.48	2.58
BcellWH2_01619	-0.91	-0.75	-0.88	-0.89	-0.87	-0.86 ± 0.06	-0.78	0.4	0.17	-0.84	-1.44	-0.5 ± 0.76	-0.67	-0.77	-1.12	-1.17	-0.49	-0.84 ± 0.29	-0.68	-1.15	-0.5	-0.59	-0.28	-0.64 ± 0.32	-0.84	-1.23	-0.62	-0.76	-0.86	-0.86 ± 0.23	-0.41	-0.82	-0.29	-0.28	0.25	-0.33	-0.16 ± 0.28	-0.93	-0.75	-0.89	-0.41	-0.42	-1.17	-0.72 ± 0.37	0.02	-0.73	-1.06	-0.21	-1.14
BcellWH2_01622	1.48	-1.65	-1.2	-0.9	-1.37	-0.73 ± 1.26	-2.48	-0.02	-1.57	-0.36	0.21	-0.84 ± 1.14	1.26	1.45	1.04	0.8	-1.06	0.7 ± 1.01	1.99	0.98	1.09	0.98	0.71	1.15 ± 0.49	0.18	1.47	1.58	1.59	1.84	1.33 ± 0.66	1.81	-1.5	1.35	1.7	1.66	1.48	1.55 ± 0.16	1.25	1.53	1.27	1.58	1.86	1.52	1.56 ± 0.24	1.51	1.65	1.42	1.77	1
BcellWH2_01624	-0.22	-1.25	-1.11	-1.02	-1.07	-0.94 ± 0.41	-2.11	-0.48	-0.26	-0.33	-0.08	-0.65 ± 0.83	0.47	0.76	0.89	-0.21	0.58	0.5 ± 0.43	1.65	0.25	0.96	-0.76	0.23	0.47 ± 0.9	-1.02	0.12	0.68	1.52	-0.39	0.18 ± 0.98	-1.87	-1.33	0.38	-0.19	-1.72	-0.51	-0.51 ± 0.89	-0.15	0.53	-0.56	0.25	0.33	-0.14	-0.03 ± 0.41	-0.88	0.92	-1.35	0.65	0.99
BcellWH2_01627	-0.67	-1.41	-0.6	-0.33	-0.97	-0.8 ± 0.41	0.04	-1.48	-0.83	0.11	0.02	-0.43 ± 0.7	0.22	-1.05	-0.61	-0.86	0.47	-0.37 ± 0.67	-0.75	-0.64	-0.65	-0.86	-0.21	-0.62 ± 0.25	-0.41	0.33	-0.7	-0.57	-0.78	-0.42 ± 0.45	-1.21	0.45	-0.51	-0.15	0.68	-0.11	-0.02 ± 0.5	-0.31	-1.02	-0.52	-1.13	-1.24	-1.08	-0.99 ± 0.32	0.32	-0.94	-0.26	0.31	-0.9
BcellWH2_01629	1.04	1.65	1.25	1.27	1.6	1.36 ± 0.26	1.36	0.92	1.11	1.25	1.29	1.18 ± 0.18	0.79	0.94	0.78	1.16	0.48	0.83 ± 0.25	0.75	1.12	1.02	0.88	1.06	0.96 ± 0.15	0.83	0.93	0.47	0.7	0.92	0.77 ± 0.19	0.71	1.31	1.02	1.28	0.88	0.86	1.01 ± 0.19	0.46	0.32	0.92	1.1	0.07	0.5	0.65 ± 0.46	0.79	-0.18	0.7	0.24	1.03
BcellWH2_01632	-1.03	-0.39	-0.76	-0.47	0.12	-0.51 ± 0.43	0.53	-1.24	-0.45	-0.19	-0.47	-0.36 ± 0.64	-1.2	-1.11	-0.89	0.03	-0.48	-0.73 ± 0.51	-1.26	-1.17	-0.75	-0.81	-1.04	-1 ± 0.22	-1.04	-0.25	-0.53	-0.65	0.55	-0.38 ± 0.59	0.24	0.27	0.24	-1.5	-0.18	0.24	-0.3 ± 0.82	-0.8	-1.2	0.25	-1.81	-1.61	0.23	-0.73 ± 1.13	-0.82	-0.69	-0.85	0.19	-0.78
BcellWH2_01648	1.03	0.77	0.55	0.29	-0.16	0.49 ± 0.46	1.29	1.29	1.07	1.11	1.17	1.19 ± 0.1	-0.01	0.81	0.66	0.94	0.76	0.63 ± 0.37	1.06	1.23	0.13	1.08	1.21	0.95 ± 0.46	1.28	0.51	0.89	1.02	0.67	0.87 ± 0.3	0.96	1.15	0.86	1.2	1.38	1.19	1.16 ± 0.22	0.86	0.95	1.09	0.88	0.71	0.68	0.84 ± 0.19	0.84	0.36	1.34	1.08	-1.2
BcellWH2_01649	1.1	0.74	0.98	0.81	0.51	0.83 ± 0.23	1.11	1.34	0.81	0.88	0.94	1.02 ± 0.21	0.79	0.75	1.07	1.07	1.33	1 ± 0.24	0.01	0.99	1.21	0.91	1.04	0.83 ± 0.47	1.3	1.3	1.07	1.07	1.02	1.15 ± 0.13	1.5	1.13	1.44	1.37	1.38	1.37	1.39 ± 0.04	1.58	1.39	1.43	1.4	1.4	1.4	1.41 ± 0.01	1.58	1.71	1.51	1.53	1.15
BcellWH2_01650	-0.22	0.15	-1.04	0.24	-1.41	-0.46 ± 0.73	0.16	-0.2	-0.06	-0.13	-0.1	-0.06 ± 0.13	-0.04	0.19	-0.79	0.19	-0.96	-0.28 ± 0.55	-0.51	0.55	0.68	-1.05	0.64	0.06 ± 0.79	0.64	-0.07	-0.47	-0.75	0.56	-0.02 ± 0.61	0.45	0.58	0.07	-0.07	-0.53	0.06	-0.12 ± 0.28	-0.65	0.68	-0.4	0.4	0.45	0.37	0.2 ± 0.41	0.59	0.62	0.21	0.55	0.78
BcellWH2_01651	1.21	0.58	0.82	0.06	-1.45	0.24 ± 1.04	0.6	-0.11	0.26	0.18	0.7	0.33 ± 0.33	-0.34	0.78	0.88	-0.11	0.95	0.43 ± 0.61	0.46	-1.02	0.5	0.48	-0.39	0.01 ± 0.68	0.21	1.09	0.91	0.31	-0.83	0.34 ± 0.75	0.63	0.68	0.69	0.81	0.45	0.53	0.62 ± 0.16	0.47	0.12	0.15	1.15	0.53	0.06	0.47 ± 0.5	-0.08	0.61	0.52	0.57	0.46
BcellWH2_01652	-	-	-	-	-	-	-	-	-	-	-	-	-	-	-	-	-	-	-	-	-	-	-	-	-1.19	-0.67	-1.04	-1.11	-0.67	-0.93 ± 0.25	-0.83	-0.71	-0.2	-0.13	-0.62	-0.78	-0.43 ± 0.32	-0.89	-1.05	-0.57	-0.78	-1.16	-0.38	-0.72 ± 0.34	-0.73	-0.36	-1.26	-0.37	-0.86
BcellWH2_01657	-0.75	-1.06	-1.14	-0.77	-1.06	-0.95 ± 0.18	-0.35	-1.1	-0.73	-0.9	-0.46	-0.71 ± 0.31	-0.44	-0.89	-0.95	-0.76	-0.68	-0.75 ± 0.2	-1.22	-0.79	-0.9	-0.24	-0.47	-0.73 ± 0.38	-0.98	-0.39	-0.75	-0.15	0.2	-0.41 ± 0.47	-1.14	-1.17	-1.94	-0.9	-0.35	-0.84	-1.01 ± 0.67	-0.57	-0.91	-0.33	-1.67	-0.97	-0.91	-0.97 ± 0.55	0.58	1.34	0.25	0.92	0.73
BcellWH2_01658	-0.54	-0.36	-0.75	-0.92	-0.87	-0.69 ± 0.23	-1.18	-1.03	-1.45	-0.63	-0.52	-0.96 ± 0.39	-0.97	-0.95	-0.65	-1.05	-0.6	-0.84 ± 0.2	-1.33	1.62	0.55	0.59	0.48	0.38 ± 1.07	0.6	-0.6	-1.11	-0.73	-0.62	-0.49 ± 0.64	-1.26	0.09	-0.99	-1.6	-1.05	0.03	-0.9 ± 0.68	-0.9	-0.27	-0.43	-0.33	-1.55	-0.75	-0.77 ± 0.55	0.71	0.44	-0.77	0.91	0.37
BcellWH2_01666	-	-	-	-	-	-	-	-	-	-	-	-	-	-	-	-	-	-	-	-	-	-	-	-	-1.1	-0.82	-0.95	-1.11	-0.93	-0.98 ± 0.12	-0.82	-0.77	-1.05	-0.91	-0.92	-0.77	-0.91 ± 0.12	-1.08	-1.04	-0.51	-0.63	-0.53	-0.95	-0.65 ± 0.2	-0.32	-0.96	-0.51	-0.75	-0.85
BcellWH2_01674	-0.71	-0.96	-0.81	-0.89	-1.24	-0.92 ± 0.2	-0.18	-0.14	-1.1	0.03	-0.1	-0.3 ± 0.45	0.05	-1.12	-0.41	-1.23	-0.92	-0.73 ± 0.54	-0.86	-0.91	-0.6	-0.81	-0.66	-0.77 ± 0.13	-0.51	-0.73	-0.34	-0.82	-1.29	-0.74 ± 0.36	0.49	-1.23	0.37	0.08	-0.06	0.42	0.2 ± 0.23	-0.34	-0.63	-0.64	-1.3	-0.15	-0.85	-0.73 ± 0.48	-1.25	-0.82	-1.08	-0.18	-0.84
BcellWH2_01676	-0.86	-1.12	-0.9	-0.67	-1.07	-0.92 ± 0.18	0.04	-0.03	-1.18	-0.03	0.04	-0.23 ± 0.53	-1.25	-0.95	-0.83	-0.59	-1.25	-0.97 ± 0.28	-0.77	-0.86	-0.88	-1.18	-0.74	-0.89 ± 0.18	-	-	-	-	-	-	-	-	-	-	-	-	-	-	-	-	-	-	-	-	-	-	-	-	-
BcellWH2_01677	-1.13	-0.85	-0.92	-0.89	-0.99	-0.96 ± 0.11	-1.01	-0.98	-1.17	-1.39	-0.13	-0.94 ± 0.48	-0.34	-0.73	-1.09	-1.33	-1	-0.9 ± 0.38	-0.88	-0.8	-0.35	-1.22	-1.07	-0.86 ± 0.33	-	-	-	-	-	-	-	-	-	-	-	-	-	-	-	-	-	-	-	-	-	-	-	-	-
BcellWH2_01678	-1.04	-0.91	-0.92	-1.13	-1.22	-1.04 ± 0.13	-1.45	-0.11	-0.37	-0.02	-0.19	-0.43 ± 0.59	0.09	-0.43	-0.59	-0.54	-0.97	-0.49 ± 0.38	-1.01	-0.74	-0.89	-0.8	-0.29	-0.75 ± 0.27	-1.07	-1.04	-0.95	-0.92	-1.36	-1.07 ± 0.18	-0.97	-0.09	0.22	0.52	-0.68	-0.38	-0.08 ± 0.55	-0.43	-0.93	-0.84	-1.38	-0.73	-1.11	-1.01 ± 0.29	-0.87	-0.83	-0.59	-0.64	-0.94
BcellWH2_01679	-0.63	-1.73	-0.07	-1.6	-0.95	-1 ± 0.69	0.47	0.2	0.42	0.68	0.42	0.44 ± 0.17	-0.17	0.25	0.25	-0.72	-0.44	-0.16 ± 0.43	-0.33	-0.75	-0.59	-1.03	-0.11	-0.56 ± 0.36	-0.24	-0.73	-0.17	0.63	-1.76	-0.46 ± 0.88	0.7	0.72	0.86	0.67	0.23	0.5	0.57 ± 0.27	-0.56	0.37	0.24	0.18	0.34	0.14	0.23 ± 0.09	0	0.28	0.18	0.08	-0.03
BcellWH2_01688	-	-	-	-	-	-	-	-	-	-	-	-	-	-	-	-	-	-	-	-	-	-	-	-	-1.07	-0.93	-0.55	-0.7	-1.09	-0.87 ± 0.24	-0.78	-0.74	-0.69	-0.89	-0.82	-0.71	-0.78 ± 0.09	-0.53	-0.81	0.17	-0.87	-0.97	-0.54	-0.55 ± 0.52	-0.94	-0.41	-1.14	-1.17	-0.01
BcellWH2_01693	-0.51	-0.25	1.01	-0.47	0.12	-0.02 ± 0.63	-0.89	-1.12	-0.66	-0.78	-0.41	-0.77 ± 0.26	-1.21	-1.02	-0.36	-0.83	-1.17	-0.92 ± 0.34	-0.48	-0.26	-0.79	-0.88	0.29	-0.42 ± 0.47	0.08	-0.61	0.44	-0.75	0.36	-0.1 ± 0.55	-0.16	-1.15	0.31	0.35	0.38	0.03	0.27 ± 0.16	-0.85	0.36	-0.92	0.64	-0.58	0.57	-0.07 ± 0.8	0.87	-0.35	0.61	0.3	0.55
BcellWH2_01694	-0.45	0.19	-0.97	0.39	0.32	-0.1 ± 0.59	-0.28	-1.54	-1.47	-0.3	-0.3	-0.78 ± 0.67	-1.53	-1.22	-0.84	0.4	-1.16	-0.87 ± 0.75	-0.92	-1.15	0.94	0.54	0.4	-0.04 ± 0.94	-0.54	-0.87	0.32	-0.01	-1.04	-0.43 ± 0.57	-1.01	0.4	0.05	-1.19	-0.75	-1.56	-0.86 ± 0.69	-0.79	-0.73	-0.96	-1.23	-0.9	-0.92	-1 ± 0.15	-0.61	-0.88	-0.59	-1.02	-1.04
BcellWH2_01695	-1.13	-0.82	-0.6	-0.33	-1.04	-0.79 ± 0.33	-1.39	-0.86	-0.64	-0.82	0.47	-0.65 ± 0.69	-0.61	-0.7	-1.24	-1.12	-0.59	-0.85 ± 0.31	-1.09	-1.08	-0.92	-0.58	-0.35	-0.8 ± 0.33	-	-	-	-	-	-	-	-	-	-	-	-	-	-	-	-	-	-	-	-	-	-	-	-	-
BcellWH2_01731	1.42	0.3	1.27	1.3	1.12	1.08 ± 0.45	0.42	0.81	1.11	0.88	1.03	0.85 ± 0.27	1.55	1.35	1.34	0.38	1.09	1.14 ± 0.45	1.62	0.51	1.26	1.09	1.23	1.14 ± 0.4	1.57	1.66	1.72	1.19	1.39	1.51 ± 0.22	1.57	1.28	1.46	1.27	1.37	1.34	1.36 ± 0.08	1.17	1.49	1.4	1.54	1.43	1.43	1.45 ± 0.06	1.7	1.49	1.27	0.83	1.64
BcellWH2_01733	-1.5	-1.08	-0.32	-1.28	-0.76	-0.99 ± 0.46	-1.21	0.4	-0.91	-0.96	-1.19	-0.78 ± 0.67	0.37	-0.79	-0.9	-0.93	-1.16	-0.68 ± 0.6	-1.19	-1.07	-1.48	-0.24	-1.05	-1.01 ± 0.46	-0.88	-1	-0.73	-0.84	-0.64	-0.82 ± 0.14	-1	-0.89	0.23	-1.42	-1.14	-1.05	-0.85 ± 0.73	-1.13	-1	-1.24	-0.93	-0.9	-0.43	-0.87 ± 0.34	0.22	-1.02	-0.91	-0.04	-0.85
BcellWH2_01738	-	-	-	-	-	-	-	-	-	-	-	-	-	-	-	-	-	-	-	-	-	-	-	-	-0.05	-0.17	-0.46	-0.93	-0.72	-0.47 ± 0.37	-1.25	-0.7	-0.38	-0.69	-1.5	-0.59	-0.79 ± 0.49	-1.13	-0.3	-0.95	-0.35	-0.66	-0.65	-0.65 ± 0.24	-0.98	-0.73	-0.38	-1.07	-0.84
BcellWH2_01741	-	-	-	-	-	-	-	-	-	-	-	-	-	-	-	-	-	-	-	-	-	-	-	-	-0.98	-0.71	-0.95	-0.71	-0.74	-0.82 ± 0.14	-0.97	-0.9	0.08	-1.56	-0.66	-0.71	-0.71 ± 0.67	-0.76	0.33	-0.8	-0.75	-1.23	-0.54	-0.83 ± 0.29	-0.97	-1.33	-0.93	-0.41	-0.93
BcellWH2_01742	-1.24	-1.28	-0.79	-0.68	-0.96	-0.99 ± 0.27	-0.94	-0.05	-1.19	-1.11	-0.74	-0.81 ± 0.46	-0.65	-0.97	-1.36	-0.19	-0.83	-0.8 ± 0.43	-1.08	-0.91	-0.81	-0.67	0.33	-0.63 ± 0.56	1.01	0.6	0.47	-0.58	-1.39	0.02 ± 0.98	-1.11	-0.09	-0.66	-1.83	0.2	0.55	-0.43 ± 1.06	-0.12	-1.61	-0.82	-0.21	0.28	-0.82	-0.39 ± 0.53	0.93	0.55	0.02	-1.54	-0.91
BcellWH2_01747	-	-	-	-	-	-	-	-	-	-	-	-	-	-	-	-	-	-	-	-	-	-	-	-	-0.48	-0.75	-0.45	-1.04	-0.82	-0.71 ± 0.24	-0.73	-0.77	-0.26	-1.21	-0.79	-1.09	-0.84 ± 0.43	-1.05	-0.69	-0.73	-0.45	-1.22	-0.61	-0.75 ± 0.33	-0.6	-0.81	-0.6	-0.89	-0.72
BcellWH2_01754	-0.94	-1.32	-0.82	-1.09	-1.15	-1.07 ± 0.19	0.07	-0.1	-1.24	0.04	-0.05	-0.25 ± 0.55	-0.93	-0.85	-1.05	0.21	-0.9	-0.7 ± 0.51	-0.73	-0.56	-0.77	-0.28	0.07	-0.45 ± 0.35	-0.8	-0.91	-0.87	-0.69	-0.75	-0.8 ± 0.09	-0.19	-0.32	0.49	0.04	0.21	-0.77	-0.01 ± 0.54	-0.64	-1.02	-0.07	-1.35	-0.2	-0.74	-0.59 ± 0.58	-1.16	-0.65	-0.7	-0.02	-0.95
BcellWH2_01755	-0.9	-1.45	-0.94	-1.16	-0.7	-1.03 ± 0.29	-0.41	-0.55	-0.67	-0.04	-0.14	-0.36 ± 0.26	-0.86	-0.22	-0.14	0.04	-0.12	-0.26 ± 0.35	-0.64	-0.6	-0.43	-1.01	-0.97	-0.73 ± 0.25	-0.61	0.4	-0.56	-0.39	-0.98	-0.43 ± 0.51	-0.56	0.21	-0.66	-0.49	0.22	0.26	-0.17 ± 0.48	-0.45	-1.27	0.4	-0.25	-0.18	0.2	0.04 ± 0.31	-0.69	-0.28	-0.59	-1.36	-0.29
BcellWH2_01756	-0.98	-0.18	-0.74	-0.02	-0.96	-0.58 ± 0.45	-1.31	-0.89	-0.25	-0.14	-0.1	-0.54 ± 0.54	-0.81	-0.24	-0.93	-0.79	-0.95	-0.74 ± 0.29	-0.8	-0.9	-0.85	-0.73	-1.28	-0.91 ± 0.21	-	-	-	-	-	-	-	-	-	-	-	-	-	-	-	-	-	-	-	-	-	-	-	-	-
BcellWH2_01760	0.1	1.18	1.65	1.49	1.48	1.18 ± 0.63	1.37	1.48	1.45	1.23	1.37	1.38 ± 0.1	1.4	1.33	1.07	1.52	1.43	1.35 ± 0.17	1.48	0.79	1.57	1.09	1.14	1.21 ± 0.32	1.74	1.81	1.53	1.85	1.49	1.68 ± 0.16	1.19	1.74	1.26	1.43	1.58	1.48	1.44 ± 0.14	1.26	1.33	1.6	1.18	1.44	1.52	1.44 ± 0.18	1.5	1.34	1.69	1.58	1.44
BcellWH2_01766	-0.6	0.44	-0.22	0.73	0.34	0.14 ± 0.54	0.51	0.95	0.98	0.81	0.8	0.81 ± 0.18	1.06	1.03	0.74	0.79	1.02	0.93 ± 0.15	1.73	0.24	1.03	0.49	1.1	0.92 ± 0.58	1.23	1.05	1.39	1.17	1.59	1.29 ± 0.21	1.54	1.56	1.2	1.18	1.01	1.22	1.15 ± 0.1	1.38	1.57	1.34	1.25	1.2	1.22	1.25 ± 0.06	1.5	1.48	1.18	1.18	1.4
BcellWH2_01805	1.96	2.33	2.59	2.52	2.25	2.33 ± 0.25	2.25	2.27	2.33	2.37	2.26	2.3 ± 0.05	2.16	2.14	2.36	2.35	2.28	2.26 ± 0.1	2.18	2.35	2.5	2.38	2.35	2.35 ± 0.11	2.55	2.45	2.52	2.23	2.39	2.43 ± 0.13	2.32	2.44	2.31	2.13	2.25	2.39	2.27 ± 0.11	2.38	2.45	2.32	2.41	2.22	2.43	2.34 ± 0.09	2.43	2.48	2.27	2.32	2.55
BcellWH2_01807	0.76	-1.4	0.02	0.12	0.34	-0.03 ± 0.81	-0.08	-0.35	-0.15	-0.11	0.11	-0.11 ± 0.16	-0.13	0.26	0.32	0.07	-0.91	-0.08 ± 0.5	-0.45	0.49	-1.09	0.51	0.2	-0.07 ± 0.69	0.47	-0.82	-0.65	-0.75	-1.18	-0.59 ± 0.62	-0.72	-0.42	-1.25	-1.17	-0.85	-0.73	-1 ± 0.25	0.27	-1.06	-0.78	-1.13	-0.98	-0.9	-0.95 ± 0.15	-0.99	-1.14	-1.07	-1.01	-0.56
BcellWH2_01808	0.44	-1.35	-1.3	-1.49	-0.54	-0.85 ± 0.81	-0.04	-1.56	0.37	1.43	-0.81	-0.12 ± 1.14	-1.14	-1.03	-0.98	-1.35	-0.45	-0.99 ± 0.33	-0.43	1.65	-0.19	2.96	1.76	1.15 ± 1.43	-0.67	-1.15	-0.76	-0.56	-0.3	-0.69 ± 0.31	0.72	-0.51	-1.05	0.13	-1.08	-1.14	-0.78 ± 0.61	-0.26	-0.54	-0.59	-1.01	-0.95	-0.54	-0.77 ± 0.24	-0.87	-1.1	-0.85	-1.05	-1.05
BcellWH2_01811	-0.6	-0.14	-0.32	-0.45	-0.49	-0.4 ± 0.18	-1.56	-0.1	-0.79	-1.08	-1.59	-1.03 ± 0.61	-0.8	-0.91	-0.57	0.23	-0.75	-0.56 ± 0.46	-1.05	-0.76	-0.98	-1.45	-0.98	-1.04 ± 0.25	-	-	-	-	-	-	-	-	-	-	-	-	-	-	-	-	-	-	-	-	-	-	-	-	-
BcellWH2_01812	-	-	-	-	-	-	-	-	-	-	-	-	-	-	-	-	-	-	-	-	-	-	-	-	-0.73	-0.99	-0.45	-0.79	-0.42	-0.68 ± 0.24	-1.13	-0.96	-0.94	0.16	-0.95	-0.7	-0.61 ± 0.52	-0.98	-0.66	-0.65	-0.76	-0.97	-1.1	-0.87 ± 0.2	-1.09	-0.61	-0.8	-1.09	-0.56
BcellWH2_01816	-0.53	0.38	0.38	-1.67	0.5	-0.19 ± 0.93	-0.14	0.39	-1.89	-0.05	-0.03	-0.34 ± 0.89	-1.19	-1.38	-0.62	-1.21	-0.75	-1.03 ± 0.32	-0.81	-0.84	-0.23	-0.44	-0.73	-0.61 ± 0.27	1.14	-1.13	0.43	-0.85	-0.9	-0.26 ± 0.99	-0.98	-0.78	-0.82	-1.19	0.87	-1.16	-0.57 ± 0.97	-1.05	-0.91	-0.96	0.19	-0.85	-1.18	-0.7 ± 0.61	-0.67	-0.82	-0.81	-1.15	0.14
BcellWH2_01818	1.39	1.72	1.36	1.67	1.47	1.52 ± 0.16	1.51	1.23	1.41	1.43	1.36	1.39 ± 0.11	1.27	1.37	1.37	1.33	0.98	1.26 ± 0.17	1.55	1.52	0.91	1.54	1.13	1.33 ± 0.29	1.85	1.65	1.66	1.58	1.85	1.72 ± 0.13	1.61	1.8	1.57	1.56	1.74	1.78	1.66 ± 0.11	2.02	1.76	1.78	1.73	1.71	1.81	1.76 ± 0.05	1.69	1.68	1.8	1.79	1.49
BcellWH2_01821	-0.78	-1.16	0.6	-1.17	-0.77	-0.66 ± 0.73	-1.18	0.73	-0.04	-0.12	-1.78	-0.48 ± 1	-0.65	-0.9	-0.75	-1.33	-0.53	-0.83 ± 0.31	-0.81	-1.27	-1.03	-0.77	-0.58	-0.89 ± 0.26	-0.77	-0.44	-0.7	-0.57	-0.7	-0.64 ± 0.13	-1.35	-1.05	0.14	-1.13	-1.39	-1.4	-0.95 ± 0.74	-1.18	1.02	-1.16	0.47	-0.49	0.11	-0.27 ± 0.72	0.66	0.89	-0.49	-0.35	0.02
BcellWH2_01832	0.16	0.26	-0.44	0.51	0.66	0.23 ± 0.42	-0.35	-1.45	-0.81	-1.9	-0.54	-1.01 ± 0.65	-0.4	0.11	-0.91	-1.72	-0.76	-0.74 ± 0.68	-0.45	0.49	0.03	-1.22	-1.05	-0.44 ± 0.72	-0.86	0.34	-0.74	0.47	-0.76	-0.31 ± 0.66	-1.09	0.47	-1.52	-0.96	-1.08	-1.03	-1.15 ± 0.25	-0.32	-0.64	0.15	0.06	-1.59	0.49	-0.22 ± 0.93	-0.75	-0.66	0.07	0.33	-0.84
BcellWH2_01838	-0.3	-0.38	-0.01	-0.47	-0.13	-0.26 ± 0.18	0.33	-0.16	0.04	0.24	0.22	0.13 ± 0.2	0.42	-0.78	-0.98	-0.02	-1.12	-0.49 ± 0.67	-0.33	0.04	0.15	0.26	0.1	0.04 ± 0.22	-0.77	-1.08	-0.12	-0.36	0.08	-0.45 ± 0.47	0.33	0.2	0.22	0.13	0.38	0.62	0.34 ± 0.21	-0.52	-1.14	-0.61	-0.79	0.09	0.17	-0.28 ± 0.49	0.44	0.43	0.45	-0.09	-0.79
BcellWH2_01857	-1.01	-0.85	-1.01	-1	-0.02	-0.78 ± 0.43	-1.53	-1.3	-1.02	-0.38	-1.54	-1.15 ± 0.48	-0.03	-0.36	-0.5	-0.88	-0.9	-0.53 ± 0.37	-0.79	-0.9	-0.82	-0.85	-0.64	-0.8 ± 0.1	-1.02	-0.98	-1.11	-0.7	-0.64	-0.89 ± 0.2	-0.71	-0.59	-1.26	-0.77	-0.75	-0.81	-0.9 ± 0.24	-1.11	-0.84	-1.13	-0.58	-0.77	-1.12	-0.9 ± 0.27	-0.36	-0.91	-0.83	-0.39	-0.73
BcellWH2_01859	0.79	0.32	0.18	0.12	0.42	0.37 ± 0.26	0.2	-0.01	-0.22	-0.06	-0.61	-0.14 ± 0.3	-1.12	-1.16	-0.91	0.53	0.16	-0.5 ± 0.79	-0.57	0.33	-0.75	0.58	-0.95	-0.27 ± 0.69	0.84	0.26	0.33	-0.08	0.41	0.35 ± 0.33	0.16	0.35	0.5	0.24	0.45	0.47	0.42 ± 0.12	-0.84	0.46	-1.35	0.08	0.39	-0.34	-0.3 ± 0.76	0.16	-0.97	0.22	0.25	0.35
BcellWH2_01860	-0.67	-1.19	-0.59	-0.43	-1.02	-0.78 ± 0.31	-0.41	-1.11	-1.24	-0.12	-0.38	-0.65 ± 0.49	-1.08	-0.92	-0.94	0.33	-1.2	-0.76 ± 0.62	-0.87	-0.9	-0.94	-0.48	-1.3	-0.9 ± 0.29	-1.06	-0.8	-0.9	-0.59	-0.9	-0.85 ± 0.17	-0.97	-0.84	0.15	-1.23	0.37	-1.33	-0.51 ± 0.9	-1.16	-1.03	-0.99	-0.62	-0.9	-0.6	-0.78 ± 0.2	-0.56	-0.98	-0.81	-0.7	-0.34
BcellWH2_01865	-1.04	-0.19	-1.24	-0.2	-0.85	-0.71 ± 0.49	-1.08	-0.86	-0.73	-1.4	-1.35	-1.08 ± 0.29	-1.01	-1.24	-0.81	-0.7	-0.97	-0.95 ± 0.21	-1.36	-0.76	-1.11	-0.89	-0.62	-0.95 ± 0.29	-0.61	-0.11	-0.27	-0.49	-0.47	-0.39 ± 0.2	-1.13	-1.18	-0.26	0.86	-1.46	-0.9	-0.44 ± 1	-0.53	-0.59	-0.91	-0.9	-0.84	-0.89	-0.88 ± 0.03	-0.54	-0.77	-0.06	-0.67	0.71
BcellWH2_01871	0.13	1.32	1.48	1.35	1.32	1.12 ± 0.56	1.17	1.19	1.22	1.2	1.3	1.22 ± 0.05	1.18	1.09	1.35	1.25	1.22	1.22 ± 0.1	1.25	1.34	1.55	1.45	1.45	1.41 ± 0.11	1.88	1.72	1.7	1.71	1.47	1.69 ± 0.15	1.32	1.64	1.35	1.41	1.51	1.29	1.39 ± 0.09	1.8	1.63	1.74	1.62	1.66	1.59	1.65 ± 0.07	1.76	1.77	1.44	1.54	1.55
BcellWH2_01872	0.03	0.48	-1.55	0.05	0.74	-0.05 ± 0.89	0.98	0.44	0.61	0.39	0.29	0.54 ± 0.27	0.76	-1.08	0.37	0.67	0.67	0.28 ± 0.78	-0.63	-1.25	-1.19	1.12	-0.94	-0.58 ± 0.98	-0.83	-0.33	-0.9	-0.37	-1.59	-0.81 ± 0.51	-0.06	-1.38	0.09	-0.22	-1.57	-1.08	-0.7 ± 0.77	-0.46	0.71	-1.04	-0.09	0.27	0.29	-0.14 ± 0.63	0.49	0.71	0.2	0.4	0.82
BcellWH2_01874	1.01	-1.16	-1.4	-1.3	0.81	-0.41 ± 1.21	0.57	0.75	0.45	0.62	0.81	0.64 ± 0.15	1.36	1.42	1.17	0.85	1.16	1.19 ± 0.22	1.62	0.87	0.81	0.49	1.03	0.96 ± 0.41	1.16	1.84	1.57	1.43	1.87	1.57 ± 0.3	1.84	-1.11	1.41	1.67	1.84	1.88	1.7 ± 0.21	-0.82	1.32	1.83	1.64	1.77	2.12	1.84 ± 0.2	1.86	1.72	1.75	1.69	1.71
BcellWH2_01876	-1.01	-1.14	-0.75	-0.54	-0.51	-0.79 ± 0.28	-0.09	-0.87	-0.88	-1.11	-1.06	-0.8 ± 0.41	-0.61	-0.68	-0.57	-0.79	-0.91	-0.71 ± 0.14	-0.95	-1.21	-0.79	-1.08	-0.9	-0.99 ± 0.16	-0.89	-0.52	-0.76	-0.52	-0.38	-0.61 ± 0.21	-0.82	-1.31	0.36	-1.23	0.3	-0.73	-0.32 ± 0.78	-0.49	-0.86	-0.66	0.11	-1.38	-0.9	-0.71 ± 0.62	-0.44	-0.96	-0.47	-1.06	-0.77
BcellWH2_01878	-0.95	-0.56	0.06	-0.65	-1.35	-0.69 ± 0.52	-0.7	-1.57	0.06	-0.23	-0.65	-0.62 ± 0.62	-0.13	-0.58	-1.02	-0.38	-0.25	-0.47 ± 0.35	-0.53	-0.95	-0.95	-0.98	0.08	-0.67 ± 0.46	-0.88	-0.48	0.01	0.65	0.61	-0.02 ± 0.67	-0.21	0.18	0.11	0.09	-0.45	-0.13	-0.09 ± 0.26	-0.51	0.11	-0.55	-0.11	-0.14	0.03	-0.19 ± 0.25	-0.23	-0.17	0.12	-0.16	-0.09
BcellWH2_01881	-	-	-	-	-	-	-	-	-	-	-	-	-	-	-	-	-	-	-	-	-	-	-	-	-0.74	-1.06	-0.68	-1.03	-0.33	-0.77 ± 0.3	-1.17	-0.79	-0.52	-0.45	-0.68	-0.61	-0.57 ± 0.1	-1.2	-0.52	-0.73	-0.45	-0.76	-0.63	-0.64 ± 0.14	-0.95	-0.54	-0.5	-0.35	-0.91
BcellWH2_01885	-0.63	-0.02	0.6	0.04	0.1	0.01 ± 0.44	0.26	1.06	0.36	-0.27	0.3	0.34 ± 0.47	0.84	0.41	0.63	0.61	0.61	0.62 ± 0.15	1.76	0.61	0.84	0.61	0.76	0.92 ± 0.48	-0.9	0.49	1.44	-0.56	1.3	0.35 ± 1.06	0.8	0.71	0.77	0.85	0.68	0.9	0.8 ± 0.1	0.89	1.05	1.14	1.12	0.73	0.86	0.96 ± 0.2	0.79	0.87	1.21	1.07	0.66
BcellWH2_01887	-	-	-	-	-	-	-	-	-	-	-	-	-	-	-	-	-	-	-	-	-	-	-	-	-0.9	-0.99	-0.3	0.76	0.1	-0.26 ± 0.73	-0.33	-0.36	-0.36	-0.3	-0.05	-1.25	-0.49 ± 0.53	-0.28	-0.64	0.39	-1.28	-0.03	-0.8	-0.43 ± 0.75	0.32	-0.65	-1.09	-0.28	0.22
BcellWH2_01888	-0.34	0.23	0.61	0.21	-0.41	0.06 ± 0.43	0.19	0.53	0.37	0.28	0.43	0.36 ± 0.13	-1.43	1.24	-1.3	0.61	-1.42	-0.46 ± 1.29	1.63	0.6	-0.94	0.15	-1.46	0 ± 1.23	0.2	-1.03	-0.05	0.58	-1.22	-0.31 ± 0.78	0.56	0.96	0.33	0.22	0.73	0.76	0.51 ± 0.28	-0.39	0.7	0.77	-1.69	0.16	0.11	-0.16 ± 1.06	0.14	1.03	0.78	0.58	-0.23
BcellWH2_01892	-0.66	-0.75	-1	-0.81	0.12	-0.62 ± 0.43	-0.08	-0.1	0.03	-0.92	-1.81	-0.58 ± 0.78	0.33	-1.46	-0.83	0.25	-0.64	-0.47 ± 0.76	-0.66	-0.29	-0.27	-0.86	0.29	-0.36 ± 0.44	0.68	-0.69	-0.95	-0.92	-1.16	-0.61 ± 0.74	-1.08	0.47	-1.29	0.39	-1.59	-1.44	-0.98 ± 0.92	-0.69	-0.67	-1.1	-1.25	-0.44	0.41	-0.59 ± 0.76	-0.59	0.55	1.02	-1.37	-0.96
BcellWH2_01895	-0.36	0.49	0.19	0.64	-0.91	0.01 ± 0.64	0.51	0.34	0.51	0.57	0.48	0.48 ± 0.09	0.38	0.33	-0.79	0.42	-1.15	-0.16 ± 0.75	-0.36	0.71	0.83	0.75	0.69	0.52 ± 0.5	-0.48	-0.84	-1.06	0.06	0.42	-0.38 ± 0.61	0.43	-0.19	0.59	0.43	-1.48	-1.11	-0.39 ± 1.06	-0.25	0.37	-0.88	0.45	-0.37	-0.91	-0.43 ± 0.64	-0.09	-0.84	-1.11	0.28	0.76
BcellWH2_01903	0.14	-0.06	0.16	0.44	1.26	0.39 ± 0.52	-0.13	0.17	-0.49	0.05	0.11	-0.06 ± 0.27	-0.97	-0.17	2.05	0.04	2.18	0.63 ± 1.41	-0.31	0.18	0.89	0.1	-0.04	0.17 ± 0.45	1.56	1.89	0.41	1.18	0.42	1.09 ± 0.67	0.16	0.31	-1.07	0.13	1.62	1.6	0.57 ± 1.3	-0.75	0.59	1.78	0.05	0.3	0.2	0.58 ± 0.81	0.91	0.43	0.23	0.27	0.59
BcellWH2_01905	-1.3	0.75	0.29	0.4	-1.2	-0.21 ± 0.96	0.22	0.32	0.33	-2.22	-0.34	-0.34 ± 1.09	-1.04	0.26	-0.43	-1.13	-0.84	-0.64 ± 0.57	-0.41	-0.92	0	-0.76	-0.31	-0.48 ± 0.37	0.88	0.52	0.53	0.83	0.11	0.58 ± 0.31	-1.68	-1.44	0.17	-0.08	-0.73	-0.29	-0.23 ± 0.38	1.46	0.29	-1.16	0.19	0.12	-0.23	-0.27 ± 0.62	-1.25	0.34	0.2	-0.32	0.72
BcellWH2_01906	1.79	1.16	1.45	1.33	1.28	1.4 ± 0.24	1.14	1.23	1.43	1.42	1.42	1.33 ± 0.13	1.45	1.4	1.44	1.32	1.51	1.42 ± 0.07	1.72	1.33	1.46	1.34	1.33	1.44 ± 0.17	0.75	1.45	1.82	1.8	1.79	1.52 ± 0.46	1.65	1.57	1.33	1.79	1.55	1.7	1.59 ± 0.2	1.41	1.42	1.57	1.63	1.55	1.82	1.64 ± 0.13	1.85	1.48	1.77	1.7	1.21
BcellWH2_01907	0.29	0.18	0.5	0.26	0.43	0.33 ± 0.13	0.49	0.27	0.37	0.39	0.27	0.36 ± 0.09	0.3	-1.16	-1.03	-1.45	-0.91	-0.85 ± 0.67	0.24	0.44	-0.52	0.29	0.61	0.21 ± 0.43	-1.03	1.24	-1.5	-0.63	0.48	-0.29 ± 1.12	0.33	1.06	0.54	0.75	0.86	0.85	0.75 ± 0.15	-0.02	-0.12	0.61	0.2	0.17	0.5	0.37 ± 0.22	0.63	-0.74	-0.21	0.61	-1.14
BcellWH2_01912	-	-	-	-	-	-	-	-	-	-	-	-	-	-	-	-	-	-	-	-	-	-	-	-	-0.96	-0.58	-0.44	-0.59	-0.91	-0.69 ± 0.23	-0.11	-0.36	-1.19	-0.25	-1.12	-0.37	-0.73 ± 0.49	-1.23	-1.37	-1.32	-0.47	-0.55	-1	-0.83 ± 0.4	-1.16	-0.7	-0.8	-0.23	-0.83
BcellWH2_01913	-1	-0.95	-0.11	-0.82	0.05	-0.57 ± 0.5	-1.14	-0.03	0.08	-0.76	-0.48	-0.47 ± 0.51	0.22	-0.58	-0.86	-1.4	-0.57	-0.64 ± 0.59	-0.74	0.13	-1.03	-0.65	-0.74	-0.61 ± 0.44	-0.25	-0.69	-0.75	0.14	0.15	-0.28 ± 0.43	-0.79	-1.21	-1.43	-0.12	-1.03	-0.87	-0.86 ± 0.55	-0.67	0.52	-0.49	-0.17	-0.05	-0.39	-0.28 ± 0.2	-0.56	-0.02	-0.95	-1.37	-1.01
BcellWH2_01914	-1.03	-0.85	-0.27	-0.79	-1.01	-0.79 ± 0.31	-1.21	-0.88	-1.11	-0.17	-0.74	-0.82 ± 0.41	-0.31	-0.84	-1.06	-0.48	-0.99	-0.74 ± 0.33	-0.77	-0.7	-0.93	-0.7	-1.35	-0.89 ± 0.27	-0.47	-0.7	0	0.13	-0.12	-0.23 ± 0.34	-0.93	0.02	-1.61	-0.4	-1.29	-1.31	-1.15 ± 0.52	-0.21	0.14	-0.39	-0.16	0.24	0.35	0.01 ± 0.35	-0.96	0.03	-1.07	0.11	0.02
BcellWH2_01929	-	-	-	-	-	-	-	-	-	-	-	-	-	-	-	-	-	-	-	-	-	-	-	-	-0.5	-0.73	-0.91	-0.91	-0.75	-0.76 ± 0.17	-1.22	-1.12	-0.62	-0.8	-0.69	-0.7	-0.7 ± 0.08	-1.34	-0.83	-0.82	-0.49	-1.02	-0.38	-0.68 ± 0.29	-0.55	-0.85	-1.23	-0.58	-0.84
BcellWH2_01946	-1.24	-0.93	-0.81	-0.38	-1.1	-0.89 ± 0.33	-0.93	-0.37	-0.42	-0.67	-0.41	-0.56 ± 0.24	0.55	-0.94	-1	-1.12	-0.17	-0.54 ± 0.71	-0.26	-0.76	-0.38	-0.84	-0.23	-0.49 ± 0.29	-1.14	-0.45	-0.27	-0.16	-1.01	-0.61 ± 0.44	-0.63	-0.54	-0.29	-0.59	-0.66	-0.72	-0.57 ± 0.19	-0.76	-0.51	-0.74	-0.09	-0.27	-0.12	-0.3 ± 0.3	-0.57	-0.55	-0.34	-0.27	-0.15
BcellWH2_01947	0.59	-1.47	0.21	1.15	1.04	0.3 ± 1.06	0.2	-0.19	-0.21	-0.15	-0.09	-0.09 ± 0.17	-1.36	0.45	-1.4	-1.39	0.21	-0.7 ± 0.94	-0.16	-1.12	-0.37	-0.47	-1.23	-0.67 ± 0.48	0.77	-0.71	0.81	1.56	-1.28	0.23 ± 1.18	0.65	0.72	0.32	0.24	-1.25	-1.5	-0.55 ± 0.96	1.19	0.32	-1.25	0.29	0.53	-1.68	-0.53 ± 1.1	0.67	0.78	-1.71	0.43	1
BcellWH2_01949	-0.53	-0.22	0.19	-0.9	-0.33	-0.36 ± 0.4	-0.1	-0.09	-0.06	0.03	-0.26	-0.1 ± 0.11	0.26	-0.75	-0.65	0.31	-0.73	-0.31 ± 0.54	-0.34	-0.7	-0.29	0.57	-0.53	-0.26 ± 0.49	-0.34	-0.41	-0.37	-0.51	-0.96	-0.52 ± 0.26	0.52	-1.19	-1.86	-0.09	0.53	0.68	-0.19 ± 1.16	-0.07	-1.38	-0.79	-0.05	0.33	0.38	-0.03 ± 0.54	-0.59	0.4	0.04	-0.21	-0.87
BcellWH2_01991	2.56	2.47	2.24	2.51	2.26	2.41 ± 0.15	2.24	2.26	2.17	2.11	2.1	2.17 ± 0.07	2.4	2.11	2.28	2.48	2.18	2.29 ± 0.15	1.86	2.59	2.62	2.59	2.64	2.46 ± 0.34	2.45	2.44	2.34	2.4	2.29	2.38 ± 0.07	2.02	2.07	1.99	1.96	1.95	2.01	1.98 ± 0.03	2.31	2.03	2.1	2.13	1.91	2.09	2.06 ± 0.1	2.15	2.32	2.24	1.94	2.08
BcellWH2_01993	0.29	0.42	0.48	-0.38	0.43	0.25 ± 0.36	0.55	-0.09	-0.24	-0.2	0.34	0.07 ± 0.35	0.04	-1.15	-0.31	-0.05	-0.07	-0.31 ± 0.49	-0.31	-1.43	0.8	-0.6	0.34	-0.24 ± 0.86	0.82	0.72	0.57	-0.02	0.32	0.48 ± 0.34	0.33	0.71	0.7	0.42	0.9	0.4	0.6 ± 0.24	1.1	1.04	0.62	0.52	0.8	0.52	0.61 ± 0.13	0.6	0.49	-0.11	0.4	0.99
BcellWH2_01999	-0.92	-0.74	-1.01	-1.36	-0.92	-0.99 ± 0.23	-1.31	-0.2	0	0.35	-1.52	-0.54 ± 0.83	-0.75	-0.99	-0.97	-0.54	-0.94	-0.84 ± 0.19	-1.22	-0.46	-0.93	-0.9	-0.82	-0.87 ± 0.27	-0.87	-0.73	-0.31	-1.09	-0.86	-0.77 ± 0.29	-0.82	-0.94	-1.33	-0.26	-1.07	-1.09	-0.94 ± 0.47	-0.45	-0.84	-1.09	-1.08	-0.63	-0.59	-0.85 ± 0.27	-0.55	-0.69	-0.57	-0.69	-1.16
BcellWH2_02004	-	-	-	-	-	-	-	-	-	-	-	-	-	-	-	-	-	-	-	-	-	-	-	-	-0.31	-0.86	-0.79	-0.64	-0.8	-0.68 ± 0.22	-1.45	-1.12	-0.33	-0.54	-0.9	-0.52	-0.57 ± 0.24	-1.02	-1.26	-0.7	-1.11	-0.57	-0.88	-0.81 ± 0.23	-1.12	-0.89	-0.72	-1.12	-0.55
BcellWH2_02020	-0.84	-0.1	0.62	-0.98	0.23	-0.21 ± 0.69	-1.28	-1.51	0.25	-0.95	-1.38	-0.97 ± 0.71	-1.17	-0.86	0.3	-1.11	0.56	-0.45 ± 0.82	-1.02	-0.76	-0.6	-0.97	-0.53	-0.78 ± 0.22	0.8	0.24	0.21	0.6	0.24	0.42 ± 0.27	-0.04	-0.39	-0.01	-0.21	-0.44	-0.04	-0.18 ± 0.2	0.84	0.47	0.14	-0.07	0.12	0.23	0.1 ± 0.13	-0.4	-1.15	0.18	0.35	-0.64
BcellWH2_02021	-	-	-	-	-	-	-	-	-	-	-	-	-	-	-	-	-	-	-	-	-	-	-	-	-0.72	-0.74	0.6	0.61	0.13	-0.03 ± 0.67	-0.26	-1.42	-0.56	-0.65	-1.13	-0.56	-0.73 ± 0.27	-1.04	-1.52	-0.67	-0.33	0	0	-0.25 ± 0.32	-0.3	0.97	-1.41	-1.69	0.35
BcellWH2_02023	1.52	1.66	1.46	1.84	1.42	1.58 ± 0.17	1.36	1.26	1.31	1.19	1.45	1.31 ± 0.1	0.91	1.44	1.7	1.5	1.71	1.45 ± 0.33	0.89	1.42	1.62	1.54	1.6	1.41 ± 0.31	1.73	1.67	1.91	1.64	1.57	1.7 ± 0.13	1.65	1.36	1.45	1.56	1.22	1.42	1.41 ± 0.14	1.65	1.7	1.53	1.48	1.63	1.54	1.54 ± 0.06	1.65	1.71	1.84	1.64	1.68
BcellWH2_02024	-0.8	0.85	1.11	0.86	-0.12	0.38 ± 0.81	0.13	0.55	0.17	0.37	0.2	0.28 ± 0.18	0.45	0.55	0.65	0.52	0.75	0.58 ± 0.12	1.24	0.52	1.17	0.3	0.85	0.82 ± 0.41	1.54	1.44	1.5	0.5	1.02	1.2 ± 0.44	0.74	1.06	0.47	0.36	0.85	0.96	0.66 ± 0.29	1.47	0.48	0.5	1.2	1	1.02	0.93 ± 0.3	0.34	1.26	0.85	0.93	1.13
BcellWH2_02025	1.5	1.54	1.63	1.63	1.55	1.57 ± 0.06	1.5	1.47	1.44	1.41	1.56	1.48 ± 0.06	1.17	1.74	1.56	1.64	1.63	1.55 ± 0.22	1.16	1.71	1.29	1.48	1.51	1.43 ± 0.21	1.34	1.25	1.38	1.89	1.58	1.49 ± 0.25	1.4	1.56	1.26	1.18	1.41	1.71	1.39 ± 0.23	1.18	1.69	1.52	1.32	1.65	1.58	1.52 ± 0.14	1.54	1.71	1.65	1.48	1.51
BcellWH2_02026	-1.05	0.07	-0.31	-0.08	-0.52	-0.38 ± 0.44	-0.22	-0.85	-0.24	-0.67	0.08	-0.38 ± 0.38	-1.22	0.3	0.08	-1.13	-0.27	-0.45 ± 0.69	-0.59	-1.18	-0.36	-0.92	-0.31	-0.67 ± 0.37	0.56	-0.98	0.92	1.47	0.66	0.53 ± 0.91	-1.4	-0.04	0.03	0.15	-0.02	0.32	0.12 ± 0.15	-0.19	0.36	0.75	0.18	-2.21	0.46	-0.2 ± 1.36	-0.44	-0.66	-0.27	0.13	0.34
BcellWH2_02027	-0.67	-1.27	-1	-0.91	-1.15	-1 ± 0.23	0.53	-0.72	-0.8	-1.12	-1.05	-0.63 ± 0.67	0.37	1.01	-0.58	0.5	-0.36	0.19 ± 0.65	-0.73	1.33	-0.24	-0.78	-0.68	-0.22 ± 0.89	-0.35	-1.01	0.06	0.38	0.08	-0.17 ± 0.54	-0.14	0.66	0.05	0.33	-0.04	-0.2	0.04 ± 0.22	-0.51	-0.17	0.8	0.17	-0.04	0.37	0.33 ± 0.36	0.13	-1.08	0.08	0.35	0.21
BcellWH2_02028	1.17	0.27	0.59	-0.56	0.03	0.3 ± 0.64	0.19	0.32	-0.05	0.48	0.72	0.33 ± 0.29	0.92	0.33	0.56	0.13	0.53	0.49 ± 0.29	1.25	0.24	0.43	0.3	0.41	0.53 ± 0.41	1.3	0.9	0.99	1.15	-0.02	0.86 ± 0.52	0.97	0.84	0.85	0.54	0.63	1.01	0.76 ± 0.21	1.27	1.13	1.08	0.92	1.09	1.03	1.03 ± 0.08	0.65	1.05	0.9	0.89	1.19
BcellWH2_02029	1.17	0.79	0.12	1.04	0.77	0.78 ± 0.41	1	0.75	0.89	0.82	0.98	0.89 ± 0.11	0.83	1.06	0.29	0.78	0.4	0.67 ± 0.32	0.93	0.6	0.44	0.79	0.37	0.63 ± 0.23	1.51	1.33	1.14	1.27	1.15	1.28 ± 0.15	0.88	1.08	1.09	1.03	0.98	1.1	1.05 ± 0.06	0.96	1.23	1.33	1.1	1.11	0.98	1.13 ± 0.15	1.12	1.03	1.08	1.06	0.92
BcellWH2_02031	-	-	-	-	-	-	-	-	-	-	-	-	-	-	-	-	-	-	-	-	-	-	-	-	-0.66	-1.15	-0.75	-1.04	-0.69	-0.86 ± 0.22	-0.46	-0.67	-1.5	-1.5	-1.03	-0.94	-1.24 ± 0.3	-1.28	-0.12	-0.44	-0.56	1.08	-1.13	-0.26 ± 0.94	-0.96	-1.01	-0.76	-0.79	-0.98
BcellWH2_02033	-1.14	-0.72	-0.9	-0.88	-0.68	-0.86 ± 0.18	-1.6	0.38	-1.22	-0.75	-0.76	-0.79 ± 0.74	-1.12	-0.81	-0.52	-1.2	-0.58	-0.85 ± 0.31	-0.6	-0.76	-1.08	-1.35	-0.77	-0.91 ± 0.3	-0.76	-0.53	-1.08	-1.06	-0.45	-0.78 ± 0.29	0.2	0.46	-0.11	-1.45	-0.87	-0.74	-0.79 ± 0.55	-0.39	0.46	-0.97	-0.95	-1.03	-0.41	-0.84 ± 0.29	-1	-0.91	-1.19	-1.04	-0.66
BcellWH2_02034	1.19	1.5	1.42	1.37	1.58	1.41 ± 0.15	1.31	1.41	1.26	1.42	1.42	1.37 ± 0.07	1.66	1.79	1.73	1.76	1.81	1.75 ± 0.06	1.45	0.62	1.06	1.26	1.19	1.11 ± 0.31	1.75	1.51	1.81	1.28	1.73	1.61 ± 0.22	2.02	2	2.01	1.83	1.73	1.68	1.81 ± 0.14	2.14	2.23	1.8	2.2	2.25	2.12	2.09 ± 0.2	1.4	1.46	1.6	1.91	1.79
BcellWH2_02036	-0.25	0.61	-0.55	0.15	-1.37	-0.28 ± 0.75	-0.52	-0.29	-0.15	-0.17	-0.07	-0.24 ± 0.17	-1.29	-0.06	-0.37	0.23	0.39	-0.22 ± 0.66	0.47	0.13	0.21	0.55	-0.06	0.26 ± 0.25	0.52	1.04	-0.01	0.27	0.39	0.44 ± 0.39	0.47	-0.08	0.3	-1.55	-1.59	0.52	-0.58 ± 1.15	1.2	-0.34	0	0.33	0.75	0.44	0.38 ± 0.31	-0.5	0.62	0.42	0.46	-1.23
BcellWH2_02037	-0.73	-1.34	-1.38	-1.12	-1.22	-1.16 ± 0.26	0.17	-0.15	0.59	0.2	0.14	0.19 ± 0.26	0.1	-1.05	-0.87	-0.08	-0.93	-0.57 ± 0.53	-0.09	-0.98	-0.02	-0.94	-0.66	-0.54 ± 0.46	-0.33	-0.07	-0.47	0.83	0.1	0.01 ± 0.51	-0.35	0.64	-0.28	-0.18	0.39	-0.01	-0.02 ± 0.3	0.31	-1.4	0	-0.34	-0.92	-0.93	-0.55 ± 0.46	-0.25	-0.65	-0.62	-0.3	-1.02
BcellWH2_02038	-0.66	0.98	-0.42	1.1	0.05	0.21 ± 0.8	0.66	0.86	0.78	0.28	0.82	0.68 ± 0.24	-0.07	1.02	1.34	0.78	0.74	0.76 ± 0.52	-0.67	1.31	-0.87	-1.31	-0.14	-0.34 ± 1.01	0.84	0.67	-1.03	0.5	0.75	0.35 ± 0.78	1.16	1.11	0.89	0.85	0.7	1.56	1 ± 0.38	-0.26	0.92	0.29	0.23	0.44	0.18	0.28 ± 0.11	0.16	1.93	1.03	1.87	-1.07
BcellWH2_02041	-1.45	-0.57	-0.96	-0.17	-0.68	-0.77 ± 0.47	-0.6	0.15	-0.59	-1.54	-0.54	-0.62 ± 0.6	-1.13	-1.03	-0.97	-0.71	-1.35	-1.04 ± 0.23	-1.19	-1.34	-1.03	-0.75	-0.87	-1.04 ± 0.24	-	-	-	-	-	-	-	-	-	-	-	-	-	-	-	-	-	-	-	-	-	-	-	-	-
BcellWH2_02042	-0.87	-0.73	-0.71	-0.88	-0.85	-0.81 ± 0.08	-1.4	-0.59	-0.8	-1.11	-0.02	-0.79 ± 0.52	-0.71	0.27	-0.63	-1.02	-0.62	-0.54 ± 0.48	-0.66	-0.6	-1.07	-0.7	-0.59	-0.72 ± 0.2	-0.84	-0.96	-0.87	-0.72	0.13	-0.65 ± 0.44	-0.03	-0.89	-0.97	-0.29	-0.21	0.14	-0.33 ± 0.46	-0.86	-1.14	-0.46	0.11	-0.83	-1.15	-0.58 ± 0.54	-0.53	-0.81	0.34	-1.06	-0.47
BcellWH2_02045	0.61	1.53	1.68	1.77	1.48	1.41 ± 0.47	1	1.43	1.12	0.93	1.1	1.11 ± 0.19	1.32	1.43	1.48	1.52	1.6	1.47 ± 0.1	1.17	1.32	1.45	1.59	1.8	1.47 ± 0.24	1.73	1.6	2.01	2.24	2	1.92 ± 0.25	1.34	1.56	1.41	1.57	1.34	1.52	1.46 ± 0.1	2.15	1.93	1.56	1.79	1.87	1.84	1.76 ± 0.14	1.95	1.95	1.78	1.97	2.01
BcellWH2_02046	1.5	1.43	1.49	1.67	1.38	1.49 ± 0.11	0.99	1.02	0.78	0.81	0.83	0.89 ± 0.11	1.21	1.16	1.17	1.25	1.38	1.23 ± 0.09	0.62	1.53	1.61	1.29	1.42	1.29 ± 0.4	1.59	1.62	1.63	1.92	1.43	1.64 ± 0.18	0.87	1.06	0.94	0.98	0.92	-0.15	0.67 ± 0.55	1.44	1.76	1.14	1.65	0.97	1.22	1.25 ± 0.29	1.42	1.44	1.4	1.17	1.23
BcellWH2_02054	0.89	1.36	1.34	1.48	1.3	1.27 ± 0.22	1.17	1.35	1.07	1.08	0.94	1.12 ± 0.15	1.34	1.2	0.83	0.96	1.21	1.11 ± 0.21	0.94	0.41	0.77	1.12	0.83	0.81 ± 0.26	1.78	1.71	1.93	1.41	1.93	1.75 ± 0.21	1.65	1.48	1.25	1.55	1.41	1.41	1.41 ± 0.12	1.63	1.51	1.45	1.65	1.67	1.68	1.61 ± 0.11	1.79	1.74	1.67	1.57	1.62
BcellWH2_02058	-	-	-	-	-	-	-	-	-	-	-	-	-	-	-	-	-	-	-	-	-	-	-	-	-1.15	-0.69	0.72	-0.67	-0.76	-0.51 ± 0.71	-0.65	-0.81	-1.25	-1.46	-0.75	-0.64	-1.03 ± 0.4	-0.43	-0.79	-0.19	0.28	-1.38	-0.86	-0.54 ± 0.73	-1.06	0.42	-0.59	-0.74	-0.87
BcellWH2_02059	-	-	-	-	-	-	-	-	-	-	-	-	-	-	-	-	-	-	-	-	-	-	-	-	-0.63	-0.74	-0.39	-0.9	-0.41	-0.61 ± 0.22	-0.92	-1.02	0.29	0.38	-1	-0.93	-0.32 ± 0.75	-0.55	-0.83	-0.53	-1.06	-0.69	-0.94	-0.8 ± 0.24	-0.57	-0.8	-0.83	-0.89	-0.85
BcellWH2_02060	-1.29	-1.04	-0.72	-0.76	-0.89	-0.94 ± 0.23	-1.51	0.01	-1.09	-1.69	-1.41	-1.14 ± 0.68	0.82	0.56	-0.67	-1.29	-0.93	-0.3 ± 0.94	1.37	-1.08	-0.97	-0.63	-1.09	-0.48 ± 1.05	-0.33	-0.2	-0.92	-0.06	-0.2	-0.34 ± 0.34	-1.33	-0.04	0.39	0.17	-0.04	-1.33	-0.2 ± 0.77	-0.2	0.01	1.21	-0.36	-0.1	0.29	0.26 ± 0.69	-0.92	-0.38	-1.34	-1.33	1.2
BcellWH2_02065	-1.13	-0.98	-1.14	-0.68	-1.04	-0.99 ± 0.19	-0.3	-1.32	-0.93	-0.04	-0.39	-0.6 ± 0.52	0.2	-1.23	-1.13	-1.04	-0.95	-0.83 ± 0.58	-1.04	-0.95	-0.43	0.67	-0.48	-0.44 ± 0.68	-0.22	-0.31	-1.04	-0.34	-0.64	-0.51 ± 0.33	0.17	-1.73	-0.37	-0.14	0.25	-0.17	-0.11 ± 0.26	-0.2	-0.35	0.66	-1.49	-0.69	-0.37	-0.47 ± 0.89	0.59	-0.01	0.28	0.53	0.91
BcellWH2_02066	-	-	-	-	-	-	-	-	-	-	-	-	-	-	-	-	-	-	-	-	-	-	-	-	-0.45	-0.62	-0.45	-0.73	-1.28	-0.71 ± 0.34	-0.86	0.38	-0.21	-1.16	-1.51	-0.5	-0.85 ± 0.59	-0.27	-0.81	-0.56	-0.32	-0.98	-0.52	-0.6 ± 0.28	-0.92	-0.54	-0.08	0.07	-1.03
BcellWH2_02078	1.52	0.99	1.29	1.52	1.05	1.27 ± 0.25	1.92	1.81	1.88	1.95	1.89	1.89 ± 0.05	1.62	1.38	1.32	1.24	1.43	1.4 ± 0.14	1.35	1.47	1.66	1.78	1.94	1.64 ± 0.23	0.79	0.37	0.86	1	0.95	0.79 ± 0.25	1.89	1.74	1.92	1.79	1.88	1.86	1.86 ± 0.06	1.58	1.68	1.56	1.74	1.79	1.74	1.71 ± 0.1	1.68	1.86	1.42	1.74	1.56
BcellWH2_02079	1.36	1.51	1.4	1.25	1.48	1.4 ± 0.1	1.87	1.98	1.95	1.99	1.99	1.96 ± 0.05	1.85	1.69	1.7	1.67	1.74	1.73 ± 0.07	1.75	1.57	1.94	2.05	1.98	1.86 ± 0.2	1.56	1.39	1.44	1.31	1.52	1.44 ± 0.1	2.01	2.03	2.1	1.99	1.97	2.01	2.02 ± 0.06	1.78	1.85	1.77	1.85	2.07	1.9	1.9 ± 0.13	2.01	1.96	1.87	1.95	1.9
BcellWH2_02082	-0.67	0.94	0.18	0.51	-0.37	0.12 ± 0.65	-0.12	-0.11	-1.57	-0.58	-0.04	-0.48 ± 0.64	-0.14	-1.04	-0.82	-1.43	-0.8	-0.85 ± 0.47	-0.22	-0.95	0.74	-0.67	1.1	0 ± 0.89	0.19	0.37	-0.41	-0.73	-0.63	-0.24 ± 0.5	0.05	-0.59	-1.32	-1.76	-0.11	0.71	-0.62 ± 1.13	-0.43	-0.96	-0.48	-1.16	-1.43	-0.71	-0.95 ± 0.43	-0.66	-0.47	0.13	-1.59	-1.2
BcellWH2_02083	-	-	-	-	-	-	-	-	-	-	-	-	-	-	-	-	-	-	-	-	-	-	-	-	-1.15	-0.9	-0.59	-1.07	-1.07	-0.96 ± 0.22	-0.33	-1.07	-1.28	-0.77	-0.4	-0.96	-0.85 ± 0.37	-0.92	-0.61	-0.82	-1.18	-0.67	-0.87	-0.89 ± 0.22	-1.07	-0.97	-0.65	-0.8	-0.84
BcellWH2_02084	-	-	-	-	-	-	-	-	-	-	-	-	-	-	-	-	-	-	-	-	-	-	-	-	-0.53	-0.36	-1.03	-0.52	-0.89	-0.67 ± 0.28	0.03	0.1	0.05	-0.02	0.17	0.43	0.16 ± 0.2	-0.16	-1.25	-0.52	-0.11	-1.86	0.09	-0.6 ± 0.88	0.75	-0.68	0.41	-0.28	-1.36
BcellWH2_02086	0.67	0.99	0.81	0.22	0.31	0.6 ± 0.33	1.39	1.27	1.25	1.32	1.2	1.29 ± 0.07	1.01	1.16	1.05	1.2	1.03	1.09 ± 0.09	1.7	0.99	1.67	2.02	1.56	1.59 ± 0.38	0.6	0.88	0.83	0.8	0.12	0.65 ± 0.31	1.28	1.36	1.42	1.33	1.35	1.16	1.31 ± 0.11	1.62	1.23	1.26	0.88	1.05	0.91	1.03 ± 0.17	1.45	1.63	1.49	1.47	1.39
BcellWH2_02087	-	-	-	-	-	-	-	-	-	-	-	-	-	-	-	-	-	-	-	-	-	-	-	-	-0.45	-0.37	-0.96	-0.55	-1.14	-0.69 ± 0.34	-0.61	-0.7	-1.06	-0.85	-1.1	-0.74	-0.94 ± 0.17	-0.33	-0.35	-0.8	-0.97	-0.65	-0.35	-0.69 ± 0.27	0.09	0.11	0.32	0.08	-0.45
BcellWH2_02088	-	-	-	-	-	-	-	-	-	-	-	-	-	-	-	-	-	-	-	-	-	-	-	-	-0.77	-1.3	-1.01	-1.2	-0.86	-1.03 ± 0.22	-0.58	-0.91	-1.09	-1.13	-0.81	-0.89	-0.98 ± 0.15	-0.58	-0.73	-0.58	-0.48	-0.7	-1.01	-0.69 ± 0.23	-0.88	-0.66	-0.48	-0.32	-1.11
BcellWH2_02091	-	-	-	-	-	-	-	-	-	-	-	-	-	-	-	-	-	-	-	-	-	-	-	-	-0.47	-0.68	-0.92	-0.73	-0.78	-0.72 ± 0.16	-0.2	-0.77	-0.53	-0.03	-0.97	-0.69	-0.55 ± 0.39	-1	-1.33	-0.65	-0.35	-1.28	-0.29	-0.64 ± 0.45	0.33	-0.66	-0.1	0.1	-0.89
BcellWH2_02097	-	-	-	-	-	-	-	-	-	-	-	-	-	-	-	-	-	-	-	-	-	-	-	-	0.51	-1.09	-0.6	0.99	-0.79	-0.2 ± 0.9	-1.09	-1.25	0.13	-0.26	-0.16	-1.42	-0.43 ± 0.68	-0.56	-0.99	-0.63	0.23	0.09	0.19	-0.03 ± 0.4	-0.55	-0.58	-1.36	-0.74	-0.72
BcellWH2_02098	-0.63	0.29	-1.18	-0.52	-0.94	-0.6 ± 0.56	-0.32	-0.24	-1.53	-0.4	-0.43	-0.58 ± 0.53	0.19	0.2	-0.93	-1.26	-0.66	-0.49 ± 0.66	-0.85	-0.17	0.81	0.68	0.07	0.11 ± 0.67	1.02	0.75	0.92	0.85	0.08	0.72 ± 0.38	-0.47	0.1	-0.11	-0.45	0.21	0.12	-0.06 ± 0.29	1.32	-1.35	-1.26	0.36	-1.5	-1.44	-0.96 ± 0.89	0.04	0.69	-1.34	0.08	0.32
BcellWH2_02099	-0.26	0.56	-0.28	-0.33	-0.07	-0.08 ± 0.37	-0.36	-1.69	-0.81	-0.41	-0.35	-0.72 ± 0.57	-0.59	0.13	-0.01	-0.42	0.01	-0.18 ± 0.31	-0.4	0.36	0.53	0.69	-1.24	-0.01 ± 0.81	0.49	0.62	0.67	-0.26	0.61	0.43 ± 0.39	0.05	-0.01	0.03	0.15	0.19	0.32	0.17 ± 0.12	0.46	0.8	-0.88	0.25	0.35	-0.13	-0.1 ± 0.56	0.15	0.83	0.97	-0.05	0.56
BcellWH2_02102	-0.77	-1.1	-0.14	-0.3	-0.85	-0.63 ± 0.4	-0.16	-1.09	-1.22	0.17	-0.27	-0.51 ± 0.61	-1.15	-0.9	-0.74	-0.82	-0.27	-0.77 ± 0.32	-0.55	-1.04	-0.93	0.56	-0.93	-0.58 ± 0.66	-0.42	-1.05	-0.55	-0.76	-0.13	-0.58 ± 0.35	-0.08	-0.98	0.17	-0.97	0.24	-0.3	-0.21 ± 0.56	-0.56	-0.09	-0.63	-1.17	-0.83	-0.72	-0.84 ± 0.24	-0.88	-0.36	-1.1	0.01	-0.16
BcellWH2_02104	-1.24	-0.96	-0.48	-1.04	-0.88	-0.92 ± 0.28	-1.62	-0.56	-1.27	-1.49	-0.74	-1.14 ± 0.46	-0.54	-0.76	0.35	-0.79	-0.94	-0.54 ± 0.51	-1.03	-1.02	0.08	-0.75	-0.69	-0.68 ± 0.45	-0.5	-0.53	-0.86	-0.5	-0.54	-0.59 ± 0.16	0.15	-1.16	-0.91	-0.44	-0.96	-0.22	-0.63 ± 0.36	-0.7	-0.06	-0.71	-0.13	-0.21	-0.12	-0.29 ± 0.29	-0.63	-0.12	-0.73	-1.38	0.71
BcellWH2_02106	-0.38	0.47	0.81	0.61	0.32	0.37 ± 0.45	0.42	0.48	0.24	0.36	0.4	0.38 ± 0.09	0.32	0.23	0.48	0.42	-0.39	0.21 ± 0.35	-0.3	-1.5	-0.56	0.68	0.51	-0.23 ± 0.88	1.08	0.74	-0.95	-0.52	-1.33	-0.19 ± 1.06	0.53	0.47	0.67	0.47	0.59	0.59	0.58 ± 0.08	1.29	0.45	0.93	0.66	0.67	0.67	0.73 ± 0.13	-0.88	0.98	-1.61	-0.02	0.37
BcellWH2_02107	-0.43	0.77	-0.02	0.71	0.81	0.37 ± 0.56	0.43	0.36	0.9	0.62	0.28	0.52 ± 0.25	-1.61	-1.1	-0.03	0.34	-0.36	-0.55 ± 0.79	-0.06	0.42	1.3	0.66	-1.11	0.25 ± 0.9	0.39	0.1	0.33	0.86	0.55	0.45 ± 0.28	0.01	-0.08	0.44	0.24	-0.5	-0.36	-0.04 ± 0.45	0.83	0.68	-0.15	0.48	0.61	0.37	0.33 ± 0.33	0.24	0.62	-0.05	-0.44	0.07
BcellWH2_02108	0.55	0.12	-0.84	-0.29	-1.3	-0.35 ± 0.74	-0.73	0.37	-0.39	-0.71	-1.88	-0.67 ± 0.81	0.02	0.15	-1.07	-0.85	-0.39	-0.43 ± 0.53	-1.11	-0.11	0.15	-1.07	-0.19	-0.46 ± 0.58	0.14	0.79	0.28	0.94	0.06	0.44 ± 0.4	0.27	0.79	-0.43	0.56	0.6	0.46	0.29 ± 0.49	-0.27	0.17	0.45	0.19	0.02	0.19	0.21 ± 0.18	0.43	0.15	0.6	0.12	0.22
BcellWH2_02110	-	-	-	-	-	-	-	-	-	-	-	-	-	-	-	-	-	-	-	-	-	-	-	-	-0.61	-0.3	-0.74	-0.5	-0.84	-0.6 ± 0.21	-0.56	-0.56	-0.09	-0.42	0.05	-1.57	-0.51 ± 0.73	-0.7	0.79	-0.53	0.48	-1.3	-0.82	-0.54 ± 0.75	-0.75	-0.52	-0.12	-0.29	-0.01
BcellWH2_02120	0.77	0.48	0.98	0.69	0.6	0.71 ± 0.19	0.3	-0.18	0.53	0.44	0.36	0.29 ± 0.28	0.07	0.22	-0.63	0.4	0.21	0.05 ± 0.4	-0.73	0.46	0.57	0.69	0.11	0.22 ± 0.58	-0.65	1	0.49	0.92	-1.11	0.13 ± 0.95	0.21	0.24	-1.22	-1.14	0.09	-0.38	-0.66 ± 0.63	0.97	0.15	-0.73	-0.5	-0.06	0.38	-0.23 ± 0.49	-0.22	-1.12	0.49	-1.7	-0.99
BcellWH2_02121	-	-	-	-	-	-	-	-	-	-	-	-	-	-	-	-	-	-	-	-	-	-	-	-	-0.55	-0.23	-1.05	0.98	-1.2	-0.41 ± 0.87	0.1	0.48	-0.26	-0.27	-0.38	-0.93	-0.46 ± 0.32	1.75	0.19	-0.52	-0.31	0.08	0.12	-0.16 ± 0.31	0.16	0.26	-0.95	-1.22	-1.77
BcellWH2_02148	-0.63	0.1	-0.88	-1.09	-0.46	-0.59 ± 0.45	-1.33	-1.2	-0.83	0.09	-0.21	-0.7 ± 0.62	-0.1	-0.09	0.15	-1.14	-1.18	-0.47 ± 0.64	-0.61	0.08	-0.68	-0.75	-0.66	-0.53 ± 0.34	-0.31	1.71	-1.05	-0.28	-0.76	-0.14 ± 1.08	-0.93	-0.27	-0.14	0.1	0.53	0.57	0.26 ± 0.35	0.11	-1.27	-0.62	0.24	-0.92	-0.81	-0.53 ± 0.52	-1.17	-0.72	0.67	-1.29	-0.71
BcellWH2_02151	-	-	-	-	-	-	-	-	-	-	-	-	-	-	-	-	-	-	-	-	-	-	-	-	-0.55	-0.28	-0.78	-0.63	-0.84	-0.62 ± 0.22	-0.37	-0.92	-0.1	-0.52	0.38	-0.82	-0.27 ± 0.52	0.23	-0.7	-0.7	-1.22	-0.74	-0.97	-0.91 ± 0.24	-0.47	-0.87	0.27	-0.87	-1.31
BcellWH2_02152	0.17	0.07	0.39	0.17	0.25	0.21 ± 0.12	-0.24	-0.03	0.2	-0.4	-0.55	-0.21 ± 0.3	-1.04	-1.38	0.23	0.03	-0.57	-0.54 ± 0.68	-0.08	0.68	-0.87	0.25	-0.49	-0.1 ± 0.61	-0.49	-0.52	0.61	-0.41	0.79	0 ± 0.65	-1.2	-0.06	-0.51	-0.35	-0.77	-1.34	-0.74 ± 0.44	-0.29	-0.39	-0.5	-0.38	-1.2	-0.88	-0.74 ± 0.37	0.3	-0.63	0.03	-0.37	-0.71
BcellWH2_02153	1.69	1.63	1.52	1.71	1.61	1.63 ± 0.07	1.5	1.54	1.36	1.41	1.4	1.44 ± 0.08	1.67	1.6	1.46	1.37	1.61	1.54 ± 0.12	1.35	1.84	1.58	1.63	1.43	1.56 ± 0.19	1.71	1.63	1.58	1.05	1.32	1.46 ± 0.27	1.58	1.62	1.51	1.36	1.27	1.44	1.39 ± 0.1	1.8	1.63	0.98	1.53	1.41	1.24	1.29 ± 0.24	1.64	1.12	1.68	1.67	1.62
BcellWH2_02155	-0.55	-0.24	0.31	-0.76	0.34	-0.18 ± 0.49	-0.22	0.09	0.09	-0.13	-0.29	-0.09 ± 0.17	0.05	-1.46	0.22	0.16	0.04	-0.2 ± 0.71	0.2	0.6	0.54	0.57	-1.15	0.15 ± 0.74	-0.48	0.71	0.68	1.4	1.06	0.68 ± 0.71	0.57	-1.31	0	-0.19	-1.58	0.76	-0.25 ± 0.98	1.03	0.32	-0.59	0.28	0.87	0.76	0.33 ± 0.66	-1.32	0.94	0.71	0.57	0.77
BcellWH2_02159	-1.16	-1.19	-0.68	-0.82	-1.11	-0.99 ± 0.23	0.28	-0.52	-0.86	-1.01	-1.6	-0.74 ± 0.69	-1.04	-0.67	-1.17	-0.61	-1.12	-0.92 ± 0.26	-0.84	-0.87	-0.85	-1.24	-1	-0.96 ± 0.17	-	-	-	-	-	-	-	-	-	-	-	-	-	-	-	-	-	-	-	-	-	-	-	-	-
BcellWH2_02176	1.47	0.23	0.43	0.24	-0.35	0.41 ± 0.66	-0.37	-0.21	-0.39	-0.82	-0.75	-0.51 ± 0.26	0.34	0.37	0.64	-1.43	0.68	0.12 ± 0.88	-0.58	-0.91	1.26	-1.56	-1.2	-0.6 ± 1.1	-0.78	-0.54	-0.17	-0.84	-0.77	-0.62 ± 0.28	0.17	-1.27	-0.55	-0.56	-0.08	-0.46	-0.41 ± 0.23	-1.16	-0.52	-1.23	-0.5	-0.65	-0.59	-0.74 ± 0.33	-0.93	-0.9	-0.73	-1.34	-1.08
BcellWH2_02177	-	-	-	-	-	-	-	-	-	-	-	-	-	-	-	-	-	-	-	-	-	-	-	-	-0.91	-0.65	-0.64	-0.24	0.31	-0.43 ± 0.48	0.02	-0.06	-0.06	-0.03	0.07	-1.59	-0.41 ± 0.79	-0.18	0.09	-0.98	-0.07	-0.08	0.29	-0.21 ± 0.54	0.25	-0.28	-1.32	0.01	0.23
BcellWH2_02180	-0.46	-0.77	-0.85	-1.06	-0.86	-0.8 ± 0.22	-0.41	-1.89	-0.3	-1.26	-0.09	-0.79 ± 0.76	-0.8	-1.06	-1.09	0.08	-0.96	-0.77 ± 0.49	-0.52	0.11	-0.68	-0.96	-0.45	-0.5 ± 0.39	-0.71	-0.7	-0.85	-0.63	0.39	-0.5 ± 0.5	-0.24	0.69	-1.38	-1.86	-1.01	0.22	-1.01 ± 0.89	-0.97	-0.41	-0.36	-1.02	0	-0.77	-0.54 ± 0.45	-1.06	-0.86	-0.75	0.23	-0.64
BcellWH2_02181	0.72	0.17	0.54	0.47	0.11	0.4 ± 0.26	-1.97	-0.17	-1.38	-0.56	-2	-1.22 ± 0.83	-0.9	-1.01	0.44	0.06	-1.14	-0.51 ± 0.71	0.14	-0.25	-0.85	-0.58	0.72	-0.16 ± 0.62	-	-	-	-	-	-	-	-	-	-	-	-	-	-	-	-	-	-	-	-	-	-	-	-	-
BcellWH2_02191	-	-	-	-	-	-	-	-	-	-	-	-	-	-	-	-	-	-	-	-	-	-	-	-	-1.08	-1.02	-0.77	-1	-0.45	-0.86 ± 0.26	-0.94	-0.48	-0.23	-0.69	-1.07	-0.67	-0.66 ± 0.35	-1.11	-0.47	-0.77	-0.73	-0.87	-0.88	-0.81 ± 0.07	-0.55	-0.52	-0.94	-1.05	-1.06
BcellWH2_02193	0.27	0.62	0.24	0.46	0.67	0.45 ± 0.2	0.54	0.51	0.25	0.09	0.51	0.38 ± 0.2	0.81	0.08	0.54	0.36	0.72	0.5 ± 0.29	-0.71	0.17	0.77	0.6	0.05	0.18 ± 0.58	1.18	1.19	0.92	1.17	0.71	1.04 ± 0.21	0.66	0.89	0.72	0.91	0.78	0.7	0.78 ± 0.1	0.32	0.89	0.71	0.78	0.69	0.91	0.77 ± 0.1	0.62	0.45	0.78	0.82	0.8
BcellWH2_02194	-0.61	-1.08	-0.93	-0.75	-1.45	-0.96 ± 0.32	-0.31	-0.87	0.21	-0.08	0.11	-0.19 ± 0.43	-1.12	-0.87	-0.71	0.26	1.24	-0.24 ± 0.98	-0.3	-1.12	-0.4	0.68	-0.82	-0.39 ± 0.68	-0.04	0.54	0.28	0.72	0.46	0.39 ± 0.29	0.11	0.37	0.09	0.31	0.53	0.23	0.29 ± 0.18	-0.62	-1.41	0.82	0.18	0.16	0.1	0.32 ± 0.34	0.67	0.33	0.27	0.55	-0.41
BcellWH2_02195	-	-	-	-	-	-	-	-	-	-	-	-	-	-	-	-	-	-	-	-	-	-	-	-	-0.77	-0.65	-0.96	-0.62	0.61	-0.48 ± 0.62	-0.34	0.32	0.22	0.3	0.22	-0.63	0.03 ± 0.44	-0.13	0.39	-0.48	-0.02	0.52	0.04	0.02 ± 0.41	0.56	0.2	0.16	0.23	0.37
BcellWH2_02197	-	-	-	-	-	-	-	-	-	-	-	-	-	-	-	-	-	-	-	-	-	-	-	-	-0.38	-0.76	-1.16	-0.97	-0.51	-0.76 ± 0.32	-1.01	-1.24	-0.51	-0.42	-0.86	-0.97	-0.69 ± 0.27	-0.78	-1.23	-0.74	-0.02	-0.92	-0.62	-0.58 ± 0.39	-0.64	-0.62	-0.38	-0.84	-1.2
BcellWH2_02198	1.49	1.85	1.82	1.93	1.99	1.82 ± 0.19	1.73	1.66	1.66	1.66	1.81	1.7 ± 0.07	1.65	1.67	1.54	1.93	1.49	1.66 ± 0.17	1.68	1.95	1.67	1.51	1.7	1.7 ± 0.16	1.65	1.74	1.43	0.73	1.58	1.42 ± 0.41	1.43	1.76	1.37	1.78	1.68	1.76	1.65 ± 0.19	1.51	1.6	1.8	1.58	1.59	1.21	1.54 ± 0.25	1.78	1.65	1.86	1.49	1.33
BcellWH2_02201	-1	-1.11	-0.36	-0.75	-0.82	-0.81 ± 0.29	-0.58	-0.47	-0.95	-0.08	-0.81	-0.58 ± 0.34	-0.83	-0.55	-0.75	-0.72	-0.88	-0.74 ± 0.13	-0.87	-0.7	-0.79	-0.9	-0.72	-0.79 ± 0.09	-	-	-	-	-	-	-	-	-	-	-	-	-	-	-	-	-	-	-	-	-	-	-	-	-
BcellWH2_02206	0.91	0.74	0.37	0.28	0.6	0.58 ± 0.26	0.7	0.63	0.53	0.71	0.46	0.61 ± 0.11	0.62	0.58	0.67	0.51	0.48	0.57 ± 0.08	-0.5	0.47	0.28	0.7	0.7	0.33 ± 0.49	1.71	1.69	1.43	1	0.92	1.35 ± 0.37	0.72	0.78	0.53	0.6	1.01	-0.32	0.45 ± 0.56	0.3	0.71	-1.2	0.56	0.7	0.85	0.23 ± 0.96	0.91	0.54	-0.35	0.8	0.18
BcellWH2_02207	0.6	1.17	0.56	0.37	1.85	0.91 ± 0.61	1.71	0.71	1.53	1.58	0.8	1.27 ± 0.47	0.37	0.15	1.15	1.88	2.01	1.11 ± 0.85	1.02	0.59	-0.79	2.21	0.51	0.71 ± 1.08	0.99	0.55	0.87	0.78	0.37	0.71 ± 0.25	0.47	0.88	0.91	-0.02	0.56	0.78	0.56 ± 0.41	-0.72	0.89	0.97	0.68	0.06	0.34	0.51 ± 0.4	0.95	0.53	0.79	0.91	0.63
BcellWH2_02222	-	-	-	-	-	-	-	-	-	-	-	-	-	-	-	-	-	-	-	-	-	-	-	-	0.5	-0.69	0.29	-0.55	0.23	-0.04 ± 0.54	-1.15	0.36	-0.61	-0.08	0.17	-0.4	-0.23 ± 0.34	-0.27	-1.1	-0.73	0.04	-0.13	-0.74	-0.39 ± 0.4	-0.45	-0.8	-1.2	-1.49	-0.74
BcellWH2_02224	-1.21	-0.89	-0.58	-0.49	-0.91	-0.82 ± 0.29	-1.05	-0.74	-0.85	-1.09	-1.26	-1 ± 0.2	-0.57	-0.83	-0.23	-0.86	-1.03	-0.71 ± 0.31	-0.97	-0.98	-0.99	-0.93	-0.75	-0.93 ± 0.1	-0.87	-1.06	-0.93	-1.43	-0.76	-1.01 ± 0.26	-0.84	-1.03	-0.97	-1.18	-0.38	0.22	-0.57 ± 0.63	-0.67	-1.01	-0.75	-1.09	-0.37	-0.65	-0.72 ± 0.3	-1.15	-0.53	-0.63	-1.03	-0.99
BcellWH2_02225	-0.98	-0.65	-1.17	-0.27	-1.02	-0.82 ± 0.36	-0.69	-0.59	-0.71	0.79	-1.49	-0.54 ± 0.83	-0.37	-0.86	-0.53	-0.01	-0.91	-0.54 ± 0.37	-0.96	-1.03	-0.23	-0.43	-0.53	-0.63 ± 0.35	-0.71	0.92	-0.44	-0.76	-0.91	-0.38 ± 0.74	-1.15	-1.16	-0.36	-1.48	-0.68	0.04	-0.62 ± 0.64	-0.24	-1.2	-0.79	-1.35	0.97	-0.79	-0.49 ± 1.01	-0.61	-1.1	-0.06	-0.24	0.16
BcellWH2_02226	-	-	-	-	-	-	-	-	-	-	-	-	-	-	-	-	-	-	-	-	-	-	-	-	-0.99	0.49	-0.72	-0.67	-0.84	-0.54 ± 0.59	-0.47	-0.16	-1.38	-1.76	0.33	0.09	-0.68 ± 1.04	-0.82	-1.11	-0.87	-1.42	-0.47	-0.25	-0.75 ± 0.51	-0.93	-0.17	-0.84	-0.89	-0.6
BcellWH2_02233	-0.89	2.08	-0.57	-0.78	-0.97	-0.23 ± 1.3	-1.61	-0.29	-1	-0.83	-0.84	-0.91 ± 0.47	-0.95	-0.79	-0.82	-0.15	-0.97	-0.74 ± 0.34	-1.17	-0.85	-1.05	-0.89	-0.6	-0.91 ± 0.22	-0.97	-0.89	-1.1	-1.25	-0.85	-1.01 ± 0.17	-0.67	-1.13	-0.93	-0.54	-0.72	-0.84	-0.76 ± 0.17	-1.7	-0.95	-1.06	-0.83	-0.38	-0.98	-0.81 ± 0.31	-0.78	-0.89	-1.11	-1	-1
BcellWH2_02234	-	-	-	-	-	-	-	-	-	-	-	-	-	-	-	-	-	-	-	-	-	-	-	-	-0.74	-0.99	-0.77	-0.86	-1.19	-0.91 ± 0.18	-0.97	-0.57	0.38	-0.08	-0.44	-0.2	-0.09 ± 0.35	-1.17	-0.86	-1.11	-0.77	-1.3	-0.72	-0.97 ± 0.27	-0.92	-0.76	-0.92	-0.76	-0.89
BcellWH2_02241	-	-	-	-	-	-	-	-	-	-	-	-	-	-	-	-	-	-	-	-	-	-	-	-	-0.74	-1.18	-1.32	-0.65	-0.24	-0.83 ± 0.43	-0.62	-1.02	-1.43	-0.36	-0.57	-0.64	-0.75 ± 0.47	-0.52	-0.79	-0.79	-0.84	-0.99	-1.03	-0.91 ± 0.12	-0.68	-0.52	-0.25	-0.22	-0.46
BcellWH2_02251	-0.49	0.21	0.54	0.74	0.17	0.23 ± 0.47	-2.04	0.36	-0.15	-0.38	-0.52	-0.55 ± 0.9	-1.19	0.17	0.36	-0.21	0.51	-0.07 ± 0.68	0.96	-0.84	-0.74	-1.14	-1.36	-0.62 ± 0.92	-0.57	-0.51	0.15	-0.49	0.17	-0.25 ± 0.38	-1.49	0.24	0.03	-0.25	-1.91	-0.22	-0.58 ± 0.89	-0.33	-1.14	-0.5	0.06	-0.1	0.1	-0.11 ± 0.27	0.3	0.35	-0.02	0	0.48
BcellWH2_02252	-	-	-	-	-	-	-	-	-	-	-	-	-	-	-	-	-	-	-	-	-	-	-	-	-1.08	-1.06	-0.64	-0.33	-0.76	-0.77 ± 0.31	0.45	-0.27	-0.18	-0.36	-0.69	-0.91	-0.53 ± 0.33	-0.6	0.54	-0.69	-1.3	-0.76	-1.07	-0.96 ± 0.28	-1.03	-0.56	-1.07	-0.92	0.76
BcellWH2_02264	-0.65	-1	-1.08	-0.44	-0.59	-0.75 ± 0.28	0.73	-1.26	-1.49	-0.17	-0.13	-0.46 ± 0.91	-0.85	-0.81	-1.1	-1.09	-0.85	-0.94 ± 0.14	-0.91	-1.14	-0.5	-0.89	-0.83	-0.86 ± 0.23	-0.71	-0.63	-1.02	-1.12	-1.02	-0.9 ± 0.22	-1.32	-0.23	0.23	-1.59	0.14	-0.84	-0.52 ± 0.86	-0.45	-0.48	-0.64	-0.83	-0.92	-1.02	-0.85 ± 0.16	-0.4	0.1	-0.87	-0.14	-0.87
BcellWH2_02269	-0.5	-1.14	-0.8	-0.56	-0.91	-0.78 ± 0.26	-0.93	-1.04	-0.23	-0.56	-0.09	-0.57 ± 0.42	-0.58	-0.78	-1.21	-0.28	-0.45	-0.66 ± 0.36	-0.44	-0.69	-0.57	-0.97	-0.59	-0.65 ± 0.2	-0.37	-0.94	-0.66	-0.71	-0.57	-0.65 ± 0.21	0.12	-0.29	0.22	-0.41	-0.03	0.31	0.03 ± 0.32	0.13	0	0.09	-0.86	-1.25	-1.16	-0.8 ± 0.61	-0.68	0.02	0.16	-0.32	-0.38
BcellWH2_02270	-	-	-	-	-	-	-	-	-	-	-	-	-	-	-	-	-	-	-	-	-	-	-	-	-0.72	-0.83	-0.96	-0.99	-0.59	-0.82 ± 0.17	-0.86	-1.4	0.15	0.28	-0.8	-0.96	-0.33 ± 0.63	-0.9	0.51	-0.65	-0.6	-0.98	-1.1	-0.83 ± 0.25	-0.84	0.68	-1.08	-1.23	-0.87
BcellWH2_02273	-	-	-	-	-	-	-	-	-	-	-	-	-	-	-	-	-	-	-	-	-	-	-	-	-0.54	-0.8	-0.12	-0.39	-0.83	-0.54 ± 0.29	-0.29	-0.94	-0.41	-0.21	-0.17	1.11	0.08 ± 0.69	-0.49	-0.94	-1.2	-1.19	-0.88	-1.39	-1.17 ± 0.21	-0.12	-0.65	-0.51	-0.92	-1
BcellWH2_02279	-1.07	-0.7	-0.81	-0.63	-1.48	-0.94 ± 0.35	-0.33	-0.71	-1.11	-1.25	0.02	-0.68 ± 0.53	-0.78	-1.11	-0.98	-0.97	-1.32	-1.03 ± 0.2	-0.81	-0.81	-0.9	-0.57	-1.33	-0.88 ± 0.28	-0.94	-0.99	-0.89	-0.66	-0.93	-0.88 ± 0.13	-0.6	-1.2	-0.72	-0.37	-0.54	-0.73	-0.59 ± 0.17	-1.09	-0.29	-1.22	-0.97	-1.01	-1.14	-1.09 ± 0.12	-1.35	-0.8	-0.92	-0.71	-0.72
BcellWH2_02289	-0.11	-0.49	-0.85	0.5	0.48	-0.09 ± 0.59	-0.97	-1.81	-0.98	-0.48	-0.08	-0.87 ± 0.65	-0.26	0.1	-0.5	-0.23	-0.11	-0.2 ± 0.22	-0.34	0.45	-0.63	0.76	0.02	0.05 ± 0.56	0.11	-1.12	0.19	-0.65	0.69	-0.16 ± 0.72	-0.05	-1.52	-0.17	0.23	0.14	-0.47	-0.07 ± 0.32	-0.54	0.78	0.81	-0.42	0.03	0.34	0.19 ± 0.52	-0.45	0.7	-0.13	0.02	-0.09
BcellWH2_02290	2.06	-1.05	0.48	-0.47	0.22	0.25 ± 1.18	-1.03	-0.45	-1.62	-1.02	-0.28	-0.88 ± 0.53	-0.08	-1.46	0.51	-0.41	0.46	-0.2 ± 0.8	0.4	-0.1	-0.75	0.4	0.14	0.02 ± 0.48	0.8	-0.68	-0.84	-0.19	0.42	-0.1 ± 0.7	-0.88	-1.15	-0.53	-0.67	-1.45	-0.12	-0.69 ± 0.56	-0.13	0.7	0.47	-0.14	0.14	-0.25	0.05 ± 0.32	0.33	0.82	0.19	0.07	0.53
BcellWH2_02295	1.13	0.61	0.26	0.52	0.25	0.56 ± 0.36	-0.1	-0.37	-0.35	-0.12	-0.16	-0.22 ± 0.13	-1.27	-1.06	0.33	0.41	-1.21	-0.56 ± 0.85	-0.45	0.37	-0.75	0.75	-1.15	-0.24 ± 0.79	0.41	0.59	0.77	-0.56	0.71	0.38 ± 0.55	-0.26	0.42	0.1	0.26	-1.06	-0.14	-0.21 ± 0.59	0.27	0.44	0.51	0.38	0.09	0.38	0.34 ± 0.18	0.8	0.54	1.23	0.15	0.58
BcellWH2_02308	-	-	-	-	-	-	-	-	-	-	-	-	-	-	-	-	-	-	-	-	-	-	-	-	-0.47	-0.82	-1.03	-0.19	-0.72	-0.64 ± 0.33	-0.73	0.62	-0.33	-1.46	-0.99	-0.45	-0.81 ± 0.52	-1.37	-0.74	0.16	0.08	-0.92	-1.18	-0.47 ± 0.68	-0.07	-1.39	-1.13	-1.25	-1.1
BcellWH2_02309	1.17	1.03	1.19	0.99	1.07	1.09 ± 0.09	1.38	1.23	1.1	1.28	1.24	1.25 ± 0.1	1.23	1.03	0.82	1.14	0.82	1.01 ± 0.19	1.49	1.29	1.2	0.97	1.22	1.24 ± 0.19	1.38	1.29	1.15	1.08	0.66	1.11 ± 0.28	1.14	1.45	1.44	1.38	1.39	0.69	1.22 ± 0.36	0.75	0.92	1.46	0.76	1.04	1.08	1.08 ± 0.29	0.76	0.79	1.42	0.92	0.97
BcellWH2_02310	-0.95	-0.87	-0.85	-0.7	-1.29	-0.93 ± 0.22	-0.37	-0.73	0.13	0.1	0.16	-0.14 ± 0.39	-0.93	-0.36	-0.82	-1.27	-0.66	-0.81 ± 0.34	-0.54	-1.21	-0.81	-0.72	-0.62	-0.78 ± 0.26	-0.27	-0.89	-0.57	-0.66	-0.62	-0.6 ± 0.22	0.28	0.46	-0.02	-0.56	-1.01	-0.25	-0.46 ± 0.43	-0.85	-0.69	-0.78	-1.52	-0.65	-1.25	-1.05 ± 0.4	-0.73	-0.78	-0.44	-1	-0.66
BcellWH2_02311	-1.09	-1.33	-0.7	-1.07	-0.75	-0.99 ± 0.26	-1.46	-0.41	-0.97	-0.32	0.15	-0.6 ± 0.62	-0.42	-0.45	-1.11	-0.98	-0.15	-0.62 ± 0.41	-1	-0.59	-0.49	-1.2	-0.99	-0.86 ± 0.3	-1.28	-0.95	-1.06	-0.66	-0.89	-0.97 ± 0.23	-0.26	-0.86	-0.1	-0.43	0.84	0.5	0.2 ± 0.57	-1.37	-1.03	-0.57	0.79	-0.69	-0.83	-0.33 ± 0.75	-0.49	-0.92	-1.04	-1.12	-1.47
BcellWH2_02312	-	-	-	-	-	-	-	-	-	-	-	-	-	-	-	-	-	-	-	-	-	-	-	-	-1	-0.65	0.04	-0.87	-0.64	-0.62 ± 0.4	-0.13	-0.54	-0.31	-0.36	-1.36	0.01	-0.51 ± 0.59	-0.59	-0.51	-0.72	-0.24	-1.09	-1.04	-0.77 ± 0.39	-0.86	-1.09	-0.91	-1.28	-0.74
BcellWH2_02314	-0.4	-1.05	-0.72	-0.78	-1.33	-0.86 ± 0.35	-1.16	-0.94	-0.07	-1.21	-1.3	-0.93 ± 0.5	-0.77	-0.82	-0.39	-0.55	-0.92	-0.69 ± 0.22	-1.41	-0.76	-0.74	-1.05	-0.61	-0.91 ± 0.32	-0.67	-0.62	-0.81	0.03	-0.81	-0.58 ± 0.35	-0.09	-0.92	-0.41	-0.22	-0.89	0.83	-0.17 ± 0.72	-0.85	-0.61	-0.89	-1.13	-0.9	-0.97	-0.98 ± 0.11	-0.93	-0.46	-1.19	-1.33	-0.92
BcellWH2_02318	-0.44	-1.47	-0.49	-0.88	0.23	-0.61 ± 0.63	-0.06	-0.33	-0.47	-0.87	-1.06	-0.56 ± 0.4	-1.09	-1.07	-0.84	-0.98	-0.53	-0.9 ± 0.23	-0.72	-0.76	-0.85	-1.06	-0.66	-0.81 ± 0.15	-0.73	1.01	-1.17	-0.29	-0.8	-0.4 ± 0.84	0.28	-0.26	-0.46	0.26	-0.25	-1.46	-0.48 ± 0.72	-0.36	-1.18	-0.87	-0.12	-1.51	-0.62	-0.78 ± 0.58	-0.87	-1.36	0.57	-0.95	-0.82
BcellWH2_02319	-0.27	-0.95	-0.19	-0.28	-0.99	-0.54 ± 0.4	0.09	-1.45	-0.54	-0.43	-0.14	-0.49 ± 0.59	-0.92	-0.41	-0.6	-0.33	0.1	-0.43 ± 0.37	-0.73	0.14	-0.86	-0.91	-0.31	-0.53 ± 0.44	-1.02	-0.72	0.44	1.28	0.27	0.05 ± 0.93	0.95	0.39	0.69	0.81	0.9	0.41	0.7 ± 0.21	0.67	1.1	-1.19	-0.08	-1.48	1.05	-0.43 ± 1.15	0.38	-0.41	0.01	0.96	0.64
BcellWH2_02320	-0.37	0.16	-0.63	-0.41	-0.16	-0.28 ± 0.3	-0.51	-0.04	-0.21	-0.51	-0.17	-0.29 ± 0.21	-1.05	0.33	-0.44	-1.25	-0.33	-0.55 ± 0.63	0.05	-0.64	0.41	-0.55	0.4	-0.06 ± 0.5	-0.46	-1.21	-0.08	-0.01	-0.16	-0.38 ± 0.49	-0.16	-0.71	0.03	-0.16	0.03	0.1	0 ± 0.11	-0.22	0.25	-0.69	-0.5	-0.74	-0.51	-0.61 ± 0.12	-0.06	0	-0.22	-0.33	0.27
BcellWH2_02334	-0.43	-1.33	0.17	0.65	0.68	-0.05 ± 0.84	-1.91	0.6	0.51	0.18	-0.78	-0.28 ± 1.06	-0.16	0.83	0.8	-1.48	-1.28	-0.26 ± 1.1	-0.3	0.32	-0.51	-1.13	-0.87	-0.5 ± 0.56	0.81	0.69	0.78	0.5	1.02	0.76 ± 0.19	0.66	0.37	0.52	0.52	0.61	0.48	0.53 ± 0.06	0.98	0.69	0.81	0.49	0.81	0.61	0.68 ± 0.16	0.83	0.95	0.52	0.78	0.34
BcellWH2_02336	-1.03	-1.01	-0.51	-0.62	0.31	-0.57 ± 0.55	-1	-1.39	-1.51	0.16	-0.14	-0.78 ± 0.75	-0.59	-1	-0.57	-0.97	-0.77	-0.78 ± 0.2	-0.16	0.86	-0.7	-0.94	0.59	-0.07 ± 0.78	-0.61	-0.55	-0.37	-1.23	-0.74	-0.7 ± 0.32	-0.69	-1.49	-0.49	0.04	0.84	-0.61	-0.05 ± 0.66	-0.51	0.4	-0.6	-0.52	-1.23	-0.23	-0.64 ± 0.42	-0.85	-0.8	-1.47	0.52	-0.79
BcellWH2_02378	-	-	-	-	-	-	-	-	-	-	-	-	-	-	-	-	-	-	-	-	-	-	-	-	-1.27	-0.86	-0.99	-0.61	0.62	-0.62 ± 0.73	-0.84	-0.11	-1.41	-1.11	-0.43	-0.49	-0.86 ± 0.48	-0.69	-0.71	-0.99	-1.53	-1.1	-0.35	-0.99 ± 0.49	-1.18	-1.13	-1.09	-0.11	-0.55
BcellWH2_02380	-0.61	-0.07	-0.22	-0.97	-0.36	-0.45 ± 0.35	-0.26	-1.41	-1.14	-0.05	-0.24	-0.62 ± 0.61	-0.13	-0.81	0.12	-0.31	-0.36	-0.3 ± 0.34	-0.59	0.5	-1.04	-0.72	-0.31	-0.43 ± 0.58	-0.67	-0.47	-0.92	-0.38	-1.05	-0.7 ± 0.29	-0.77	-1.1	-0.06	-0.48	-1.17	-0.91	-0.66 ± 0.49	-0.8	-0.81	-0.57	-0.27	0.34	-0.52	-0.26 ± 0.42	0.68	-0.6	-1.21	0.22	-0.84
BcellWH2_02382	-	-	-	-	-	-	-	-	-	-	-	-	-	-	-	-	-	-	-	-	-	-	-	-	-0.71	-0.32	-0.39	-0.95	0.19	-0.44 ± 0.43	-1.54	-0.36	-0.66	0.14	-1.4	-1.04	-0.74 ± 0.66	-0.55	0.2	-0.89	0.09	-1.32	-0.88	-0.75 ± 0.59	-0.56	-1	0.45	-0.89	0.14
BcellWH2_02383	-	-	-	-	-	-	-	-	-	-	-	-	-	-	-	-	-	-	-	-	-	-	-	-	-0.84	-0.81	-0.87	-1.33	-0.71	-0.91 ± 0.24	-0.83	-0.96	-1.11	-0.54	-1.41	-0.84	-0.97 ± 0.37	-0.71	-0.57	-0.75	-1.27	-0.64	-0.47	-0.78 ± 0.34	-0.52	-1.03	-0.9	-1.34	0.17
BcellWH2_02385	-0.61	-0.01	0.68	-1.2	-1.12	-0.45 ± 0.79	0.09	-0.35	-2.16	-0.03	-0.36	-0.56 ± 0.91	0.66	0.22	0.04	-0.18	-0.15	0.12 ± 0.34	-0.79	0.48	-0.25	-0.33	-0.57	-0.29 ± 0.48	0.47	1.06	0.23	1.28	0.26	0.66 ± 0.48	-0.23	-1.69	-0.16	0.32	-0.19	-0.18	-0.05 ± 0.25	1.07	0.09	0.98	-0.08	0.37	0.49	0.44 ± 0.43	-1.37	0.43	-0.94	-0.12	0.56
BcellWH2_02386	-	-	-	-	-	-	-	-	-	-	-	-	-	-	-	-	-	-	-	-	-	-	-	-	0.12	-0.52	-0.03	-0.53	-0.2	-0.23 ± 0.29	-0.49	-0.26	-1.53	-1.8	-1	0.08	-1.06 ± 0.83	-0.45	-0.18	-0.68	-1.67	-0.9	-0.67	-0.98 ± 0.47	0.19	0.22	-0.06	-0.43	-0.86
BcellWH2_02387	-0.01	0.1	-0.68	0.32	0.55	0.06 ± 0.46	0.47	-0.46	0.23	0.55	0.48	0.26 ± 0.42	-0.49	0.54	-0.94	0.61	0.07	-0.04 ± 0.67	-0.67	0.27	1.18	0.21	-0.91	0.02 ± 0.83	-0.69	0.99	0.8	-0.58	-1.31	-0.16 ± 1	-1.38	1.11	-2	-2.01	0.23	0.77	-0.75 ± 1.47	-0.11	-0.39	0.45	-0.43	0.06	-1.42	-0.33 ± 0.81	0.41	0.36	0.3	-1.11	-0.99
BcellWH2_02391	1.53	-1.03	-0.74	-0.95	-1.34	-0.5 ± 1.16	0.09	-0.77	-0.2	0.02	0	-0.17 ± 0.35	-1.2	-0.5	-0.45	-1.62	-0.64	-0.88 ± 0.51	-0.85	-0.47	-0.65	0.6	-1.56	-0.59 ± 0.78	-0.55	-0.4	-1.21	-0.9	-0.89	-0.79 ± 0.32	-1.04	-1.1	-1.11	-1.51	0.26	-1.11	-0.87 ± 0.78	-0.51	-0.6	-0.77	-1.01	0.57	1.04	-0.04 ± 1	1.22	-0.9	-0.76	-1.07	-1.09
BcellWH2_02392	-0.38	0.8	1.29	1.04	0.24	0.6 ± 0.67	0.6	0.44	1.02	0.65	0.32	0.61 ± 0.27	0.95	1.23	0	0.85	1.38	0.88 ± 0.54	-0.46	0.15	-0.57	-0.85	0.57	-0.23 ± 0.58	-0.6	-0.1	0.88	-0.85	-0.76	-0.29 ± 0.71	0.36	-0.7	-1.32	0.91	-0.21	-1.36	-0.49 ± 1.08	-0.66	-1.03	-0.83	-1.26	-0.66	-0.95	-0.92 ± 0.26	-0.38	-0.5	0.26	-1.26	-1.31
BcellWH2_02396	-0.44	-0.18	0.41	0.31	0.34	0.09 ± 0.37	0.09	-0.1	-0.18	-0.03	0.18	-0.01 ± 0.14	-0.97	0	0.12	-0.19	0.32	-0.15 ± 0.5	-0.17	-0.53	-0.57	0.12	-0.9	-0.41 ± 0.4	1.16	0.92	1.02	-0.63	-1.54	0.19 ± 1.21	0.66	0.88	0.62	0.68	0.54	0.58	0.6 ± 0.06	1.35	-0.5	0.92	-1.41	-1.34	-1.43	-0.82 ± 1.16	0.88	0.93	0.71	0.72	-0.41
BcellWH2_02416	-	-	-	-	-	-	-	-	-	-	-	-	-	-	-	-	-	-	-	-	-	-	-	-	-0.65	-0.94	-0.53	-1.32	-0.53	-0.79 ± 0.34	-1.3	-1.09	-0.28	-0.34	-0.12	0.14	-0.15 ± 0.22	-0.52	-0.81	-0.13	-0.95	-0.79	-0.04	-0.48 ± 0.46	-0.9	-1.11	-0.61	-1.24	-0.09
BcellWH2_02418	-0.98	-1.14	-0.69	-0.84	-0.52	-0.83 ± 0.24	-0.77	0.84	-1.13	-0.32	-0.48	-0.37 ± 0.75	-0.98	-0.64	-0.9	-0.5	-0.69	-0.74 ± 0.2	-0.67	-0.9	-0.67	-0.02	-0.8	-0.61 ± 0.35	-1.25	-0.66	-0.45	-0.19	-0.29	-0.57 ± 0.42	-0.68	-0.94	-0.04	0.03	-0.09	-0.42	-0.13 ± 0.2	-0.51	-0.89	-0.38	-1.37	-1.07	-0.59	-0.85 ± 0.45	-0.26	-0.53	-0.61	-0.51	-0.34
BcellWH2_02421	-	-	-	-	-	-	-	-	-	-	-	-	-	-	-	-	-	-	-	-	-	-	-	-	-0.77	-0.48	0.24	-0.06	0.25	-0.16 ± 0.45	-0.38	-1.38	-0.38	-0.32	0.23	-0.2	-0.17 ± 0.27	-0.46	0.01	-1.02	-0.36	-0.21	-0.09	-0.42 ± 0.42	-0.81	-0.55	-0.16	-0.31	0.4
BcellWH2_02422	-0.28	-1.53	-1.48	-1.06	-0.08	-0.89 ± 0.67	-0.31	0.02	0.2	-1.69	-0.3	-0.42 ± 0.74	0.96	0.82	0.67	0.26	-1.15	0.31 ± 0.86	1.49	-1.23	-0.26	-0.56	0.98	0.08 ± 1.12	0.79	1.19	1.09	-0.95	0.99	0.62 ± 0.89	-1.26	0.84	0.94	1.19	0.69	0.57	0.85 ± 0.28	1.4	1.25	0.61	1.3	0.79	0.58	0.82 ± 0.33	0.62	1.3	1.53	1.65	1.52
BcellWH2_02423	-	-	-	-	-	-	-	-	-	-	-	-	-	-	-	-	-	-	-	-	-	-	-	-	-0.33	-0.47	-0.73	-0.5	-0.07	-0.42 ± 0.24	-0.37	-1.48	-0.42	-0.2	-0.87	-1.16	-0.66 ± 0.43	-0.32	0.43	-1.02	0.09	0.03	-0.26	-0.29 ± 0.51	-0.81	0.46	-0.87	-0.15	0.51
BcellWH2_02424	0.74	0.47	1.05	0.39	0.72	0.67 ± 0.26	0.75	0.59	0.61	0.73	0.56	0.65 ± 0.09	0.39	0.79	0.49	0.63	-0.3	0.4 ± 0.42	0.75	0.82	0.67	0.76	0.86	0.77 ± 0.08	1.23	1.15	1.41	1.35	1.11	1.25 ± 0.13	0.98	1.08	1.15	1.07	1.05	1.28	1.14 ± 0.11	1.12	1.35	0.84	1.24	1.07	0.96	1.03 ± 0.17	0.97	1.14	1.13	1.17	1.19
BcellWH2_02425	-	-	-	-	-	-	-	-	-	-	-	-	-	-	-	-	-	-	-	-	-	-	-	-	-0.81	-0.55	-0.69	-0.92	0.1	-0.57 ± 0.4	-1	-0.96	-1.46	-0.26	-0.61	-1.15	-0.87 ± 0.54	-0.62	-0.66	-0.76	-0.96	0.03	0.19	-0.37 ± 0.57	-0.81	-0.58	-0.86	-0.03	-0.85
BcellWH2_02430	-	-	-	-	-	-	-	-	-	-	-	-	-	-	-	-	-	-	-	-	-	-	-	-	-0.58	-0.85	-1.03	-1.13	0.67	-0.59 ± 0.73	-1.02	-0.72	-0.38	-0.36	-0.57	0.31	-0.25 ± 0.38	-0.33	-0.87	-0.77	0.48	-1.47	-1	-0.69 ± 0.83	-1.09	-1.34	-1.09	0.68	-0.19
BcellWH2_02431	1.18	0.17	0.01	-0.15	-0.33	0.17 ± 0.59	-0.08	-0.17	-0.48	0.14	-0.51	-0.22 ± 0.28	-1.36	-0.42	-1.05	-1.27	0.32	-0.76 ± 0.7	-0.69	-0.97	-0.5	0.7	-0.8	-0.45 ± 0.66	-0.55	-0.48	-0.72	-0.11	-1.08	-0.59 ± 0.36	-0.03	0.42	-0.25	-0.2	-1.13	0.15	-0.35 ± 0.55	-0.16	0.02	-0.9	-0.45	-0.48	0.14	-0.42 ± 0.43	-0.89	-0.66	0.78	0.09	0.29
BcellWH2_02433	-	-	-	-	-	-	-	-	-	-	-	-	-	-	-	-	-	-	-	-	-	-	-	-	-0.5	-0.81	-0.26	-0.69	0.39	-0.37 ± 0.48	-1.16	-0.77	-1.7	-1.29	-0.55	-1.17	-1.18 ± 0.48	-0.34	0.31	-0.2	-0.05	-0.06	0.1	-0.05 ± 0.12	-0.74	0.15	-0.83	-0.17	-0.87
BcellWH2_02437	-	-	-	-	-	-	-	-	-	-	-	-	-	-	-	-	-	-	-	-	-	-	-	-	-0.9	-1.1	-0.28	-0.98	-0.72	-0.8 ± 0.32	-1.33	-0.64	-1.13	-0.9	-0.85	-0.54	-0.85 ± 0.24	-0.61	0.48	-0.62	-0.99	-0.57	-0.88	-0.76 ± 0.2	-0.65	-1.13	-0.57	-0.94	-1.01
BcellWH2_02440	-0.91	0.89	-1.07	-0.77	-0.6	-0.49 ± 0.79	-1.28	-1.27	-1.5	-1.52	-1.21	-1.36 ± 0.14	-0.96	-1.21	0.78	-0.78	-0.78	-0.59 ± 0.79	-1.13	-1.4	-1.15	-0.61	-0.81	-1.02 ± 0.31	-	-	-	-	-	-	-	-	-	-	-	-	-	-	-	-	-	-	-	-	-	-	-	-	-
BcellWH2_02444	-	-	-	-	-	-	-	-	-	-	-	-	-	-	-	-	-	-	-	-	-	-	-	-	-0.94	-0.93	-0.82	-0.82	-0.73	-0.85 ± 0.08	-0.41	-1.27	-0.32	-0.61	-0.79	-1.13	-0.71 ± 0.34	-0.93	0.06	-0.79	-0.09	-0.29	-0.9	-0.52 ± 0.39	-0.69	-0.32	0.21	-0.03	-0.87
BcellWH2_02445	-	-	-	-	-	-	-	-	-	-	-	-	-	-	-	-	-	-	-	-	-	-	-	-	-1.12	-0.41	-1.1	-0.61	-0.76	-0.8 ± 0.31	-0.05	-0.78	-1.21	0.83	-0.69	-0.55	-0.41 ± 0.87	-1.19	-0.53	-0.54	-1.14	-1.02	-1	-0.92 ± 0.26	-1.01	-0.87	-1.19	-1	-1.08
BcellWH2_02446	-0.63	-1.16	-0.98	-0.65	-1.05	-0.9 ± 0.24	-1.38	-0.68	-0.55	-0.73	-2.06	-1.08 ± 0.64	-0.84	-0.88	-0.66	-0.82	-1.08	-0.85 ± 0.15	-0.89	-1.22	1.86	-0.86	-1.15	-0.45 ± 1.3	-	-	-	-	-	-	-	-	-	-	-	-	-	-	-	-	-	-	-	-	-	-	-	-	-
BcellWH2_02447	-0.58	-1.29	-0.99	-1.47	-0.49	-0.96 ± 0.43	-1.35	0.16	-0.03	-0.67	-1.82	-0.74 ± 0.85	-0.88	-1.17	0.66	-0.44	0.6	-0.24 ± 0.84	-0.98	0.44	0.03	0.72	-0.05	0.03 ± 0.65	-0.72	-0.99	-0.19	0.44	0.07	-0.28 ± 0.58	0.03	-1.17	0.15	-0.19	-1.34	-0.48	-0.46 ± 0.64	-0.12	0.5	-0.77	0.18	-0.04	0.22	-0.11 ± 0.46	0.39	0.34	-0.13	-0.29	0.32
BcellWH2_02451	-1.15	-0.88	-0.75	-0.56	-0.58	-0.78 ± 0.25	-1.45	0.64	-0.98	-1.35	0.66	-0.49 ± 1.06	-0.88	-1.08	-1.17	-0.77	-0.83	-0.95 ± 0.17	-1.09	-0.72	-1.01	-0.85	-0.88	-0.91 ± 0.14	-1.04	-0.53	-0.96	-0.74	-0.9	-0.83 ± 0.2	-0.79	-0.62	-0.29	-1.03	-0.8	-0.56	-0.67 ± 0.32	-0.99	0.52	-0.9	0.18	-1	-1.19	-0.73 ± 0.62	-0.59	-0.63	-1.1	-0.84	-0.67
BcellWH2_02452	1.14	0.27	-0.96	-1.22	-1.48	-0.45 ± 1.11	-1.97	-1.76	-1.1	-1.1	-2.11	-1.61 ± 0.48	-0.87	0.65	1.1	0.44	0.98	0.46 ± 0.79	-0.39	0.53	-0.02	-0.99	0.57	-0.06 ± 0.66	-	-	-	-	-	-	-	-	-	-	-	-	-	-	-	-	-	-	-	-	-	-	-	-	-
BcellWH2_02458	-	-	-	-	-	-	-	-	-	-	-	-	-	-	-	-	-	-	-	-	-	-	-	-	-1.25	-0.89	-0.9	-0.64	-0.62	-0.86 ± 0.26	-1.09	-0.88	-1.51	-0.59	-0.8	-0.7	-0.9 ± 0.42	-0.79	-0.89	-0.48	-1.17	-1.02	-0.84	-0.87 ± 0.3	-0.74	-0.7	-0.05	-0.89	-0.64
BcellWH2_02468	-0.49	-1.1	0.34	0.4	-0.75	-0.32 ± 0.67	-1.3	-0.63	0.27	-1.52	-1.71	-0.98 ± 0.81	-1.15	-1.12	-0.63	-0.95	-0.51	-0.87 ± 0.29	-1.06	-0.88	-0.92	-1.1	-0.39	-0.87 ± 0.28	-0.32	-0.3	-0.1	-0.33	-0.4	-0.29 ± 0.11	-0.64	-0.86	-0.75	-0.97	0.15	-0.76	-0.58 ± 0.5	-0.33	-0.29	-0.1	-0.59	-0.68	-1.13	-0.62 ± 0.42	-0.12	-0.04	-0.21	-0.35	-0.16
BcellWH2_02469	-0.61	-0.03	-1.56	-0.07	-0.28	-0.51 ± 0.63	-0.49	-0.89	-0.34	-0.24	-0.48	-0.49 ± 0.25	-1.09	0.33	0.24	-1.01	-0.84	-0.47 ± 0.7	-0.34	-0.23	0.63	-0.03	-0.18	-0.03 ± 0.39	-0.62	-0.65	0.3	-0.41	-0.19	-0.32 ± 0.39	0.03	0.21	0.17	0.02	-0.37	-1.34	-0.38 ± 0.68	-0.11	-0.15	-0.73	0	-0.78	-0.19	-0.43 ± 0.39	-0.18	0.59	-0.33	0.24	0.27
BcellWH2_02473	-0.92	-1.26	0.24	-1.13	0.2	-0.57 ± 0.74	-0.42	-0.02	0.02	0.06	-0.33	-0.14 ± 0.22	0.65	-0.95	-0.81	-1.22	-0.66	-0.59 ± 0.73	-0.81	-0.61	-0.4	-0.94	-0.72	-0.7 ± 0.2	-0.76	-0.81	-0.81	-0.01	-0.99	-0.68 ± 0.38	-1.27	-0.86	-0.35	-0.29	-0.45	-0.81	-0.47 ± 0.23	-0.8	-1.27	-0.45	-0.09	0.48	0.35	0.07 ± 0.42	-0.78	-1.06	-1.08	-1	0.09
BcellWH2_02477	-0.89	0.54	0.5	0.65	0.49	0.26 ± 0.64	0.51	0.47	0.54	0.56	0.57	0.53 ± 0.04	0.41	0.66	0.34	0.14	0.42	0.4 ± 0.19	-0.48	0.82	-0.58	0.54	0.7	0.2 ± 0.67	1.36	1.52	1.04	0.57	1.09	1.12 ± 0.36	0.9	0.89	0.42	1.11	1.16	1.21	0.98 ± 0.37	-1.08	0.93	1.3	0.82	1.04	1.14	1.08 ± 0.2	1.3	0.83	1.18	1.03	0.68
BcellWH2_02480	-	-	-	-	-	-	-	-	-	-	-	-	-	-	-	-	-	-	-	-	-	-	-	-	-0.74	-0.91	-1	-0.65	-1.08	-0.87 ± 0.18	-0.69	-1.07	-1.25	-1.11	-0.51	-0.79	-0.92 ± 0.33	-1.35	-0.63	-0.83	-0.81	-0.61	-0.9	-0.79 ± 0.12	-0.9	-0.48	-0.91	-0.48	-0.54
BcellWH2_02481	-1.17	0.1	-1.48	-0.65	-1.03	-0.85 ± 0.61	-1.11	-0.91	-0.9	-1.2	-1.51	-1.13 ± 0.25	-1.2	-0.82	-0.72	-0.37	-1.09	-0.84 ± 0.33	-0.93	-1.05	-1	-0.96	-0.66	-0.92 ± 0.15	-	-	-	-	-	-	-	-	-	-	-	-	-	-	-	-	-	-	-	-	-	-	-	-	-
BcellWH2_02483	-0.36	-0.09	-0.92	0.44	-1.22	-0.43 ± 0.66	0.06	-1.37	-0.09	-0.2	-0.31	-0.38 ± 0.57	-0.79	-0.58	-0.91	-1.28	-0.83	-0.88 ± 0.25	0.75	0.09	-0.31	-0.63	-0.48	-0.12 ± 0.56	-0.64	-0.27	0.15	-0.3	-0.89	-0.39 ± 0.4	0.77	0.53	0.24	0.2	0.15	0.87	0.37 ± 0.34	0.1	-0.95	-0.83	0.18	-0.57	-0.83	-0.51 ± 0.48	-1.22	-0.34	-0.61	-1.23	-0.52
BcellWH2_02484	-0.75	-0.17	0.04	0.3	-1.07	-0.33 ± 0.56	-0.23	-0.62	-0.17	-0.12	-0.32	-0.29 ± 0.2	-0.04	-1.26	-0.46	-0.78	-0.62	-0.63 ± 0.45	0.72	0.06	0.39	-0.06	0.06	0.23 ± 0.32	0.06	-1.08	0.56	-0.11	0.18	-0.08 ± 0.61	0.89	0.82	0.89	0.76	0.65	0.83	0.78 ± 0.1	0.29	0.28	-1.27	0.35	0.67	0.57	0.08 ± 0.91	0.75	0.62	0.2	0.77	0.8
BcellWH2_02485	-0.13	0.42	-1.07	-0.11	-0.19	-0.22 ± 0.53	0.78	-0.06	0.8	0.65	0.69	0.57 ± 0.36	-0.81	-0.21	-1.16	-0.14	-0.05	-0.47 ± 0.49	-0.13	0.32	0.81	0.36	0.18	0.31 ± 0.34	0.36	0.05	0.4	-0.79	0.64	0.13 ± 0.55	1.08	0.89	0.88	1.07	0.86	0.93	0.93 ± 0.09	0.95	0.31	0.5	0.82	0.74	0.32	0.6 ± 0.23	0.81	1	-0.03	0.22	0.93
BcellWH2_02486	-0.68	0.19	-0.78	-1.13	-1.24	-0.73 ± 0.57	-1.55	-0.63	-1.17	-1.11	-1.2	-1.13 ± 0.33	-0.52	-0.96	-0.65	-0.54	-0.94	-0.72 ± 0.21	-1.33	-1.08	-0.63	-0.73	-0.94	-0.94 ± 0.28	-0.68	-0.69	-0.63	-1.11	-0.58	-0.74 ± 0.21	-0.78	-0.68	-0.39	-1.17	-0.49	-0.79	-0.71 ± 0.35	-0.99	-0.92	-1.01	-1.07	-1.01	-0.63	-0.93 ± 0.2	-0.92	-1.04	-0.87	-0.78	-0.57
BcellWH2_02488	-0.95	0.03	-0.13	-0.76	-0.56	-0.47 ± 0.41	0.06	-0.68	-0.92	-0.14	-0.1	-0.35 ± 0.42	-1.17	-0.45	-0.38	-1.02	-0.91	-0.79 ± 0.35	-0.54	-0.71	-0.93	-0.48	-1.46	-0.82 ± 0.4	-0.71	-0.23	-0.53	-0.66	-0.85	-0.6 ± 0.23	-0.83	0.62	-0.79	0.15	-0.56	-1.12	-0.58 ± 0.54	-0.66	-0.64	-0.68	-0.39	-0.76	-0.55	-0.6 ± 0.16	-0.83	-0.77	-0.67	-1.2	-0.74
BcellWH2_02509	-	-	-	-	-	-	-	-	-	-	-	-	-	-	-	-	-	-	-	-	-	-	-	-	-0.74	-1	-0.71	-0.88	-1.07	-0.88 ± 0.16	-1.05	-0.92	-0.57	-0.22	-0.93	-1.1	-0.7 ± 0.39	-0.83	-1.07	-0.83	-0.59	-0.82	-0.3	-0.64 ± 0.25	-0.92	-0.55	-0.95	-0.74	-0.87
BcellWH2_02510	1.37	1.3	1.26	1.23	1.2	1.27 ± 0.06	1.26	1	1.01	1.07	1.02	1.07 ± 0.11	0.76	0.74	1.19	1.12	0.94	0.95 ± 0.2	1.21	1.01	0.6	0.95	1.2	0.99 ± 0.25	-0.1	1.05	-0.78	0.46	0.35	0.2 ± 0.68	0.32	1.11	0.67	0.79	1.09	0.46	0.75 ± 0.26	1.25	0.08	1.07	0.3	0.92	1.11	0.85 ± 0.38	1.08	0.75	1.18	0.54	0.22
BcellWH2_02511	-0.12	0.08	-1.29	-0.74	-0.64	-0.54 ± 0.54	0.14	-0.42	-0.28	-0.19	0.01	-0.15 ± 0.22	0.03	-0.26	0.43	0.33	-1.1	-0.11 ± 0.61	-0.67	0.68	-0.18	-0.25	0.28	-0.03 ± 0.52	-1.19	-0.48	-0.55	-0.29	-0.39	-0.58 ± 0.35	-0.61	0.15	0.35	-0.25	-1.21	-1.21	-0.58 ± 0.77	-0.49	0.06	-0.71	0.17	-0.71	-1.26	-0.63 ± 0.59	0.45	-0.85	0.18	0.51	0.51
BcellWH2_02512	-0.65	-0.11	-0.11	-0.66	-1.08	-0.52 ± 0.42	-0.1	-0.49	-0.34	-0.02	-0.2	-0.23 ± 0.19	-0.68	-0.85	-0.6	-1.17	-0.17	-0.69 ± 0.37	-0.86	-0.61	-0.66	-0.77	-0.9	-0.76 ± 0.13	0.75	-0.27	-0.82	-0.82	-0.07	-0.25 ± 0.65	-0.29	0.67	-0.39	0.04	-0.58	-0.45	-0.34 ± 0.27	-0.77	-0.93	0.25	-1.55	0.23	-0.79	-0.47 ± 0.87	-0.99	-0.09	-0.97	-1.37	0.41
BcellWH2_02513	-0.13	-1.39	-1.08	-0.92	-0.94	-0.89 ± 0.47	-2.25	-1.03	-0.13	-0.51	-0.23	-0.83 ± 0.86	0.68	-1.43	0.82	0.16	1	0.25 ± 0.99	-0.36	0.58	1.04	-0.83	0.85	0.26 ± 0.81	-0.66	-0.94	-0.61	0.92	0.59	-0.14 ± 0.83	0.49	-1.35	0.39	0.18	-1.07	-0.16	-0.17 ± 0.64	-0.32	0.72	0.48	0.51	0.81	0.61	0.6 ± 0.15	0.42	0.58	-1.03	0.83	0.5
BcellWH2_02516	-	-	-	-	-	-	-	-	-	-	-	-	-	-	-	-	-	-	-	-	-	-	-	-	0.82	-0.2	-0.8	-0.76	-1.17	-0.42 ± 0.77	-0.12	0.11	-0.66	-0.11	0.87	-1.05	-0.24 ± 0.83	0	-0.89	-0.44	-0.82	-1.02	-1.61	-0.97 ± 0.49	-0.56	-1	-1.16	-0.74	0.82
BcellWH2_02517	-0.88	-0.48	-0.82	-0.65	-0.92	-0.75 ± 0.18	-0.02	-0.71	-0.79	-1.34	-1.43	-0.86 ± 0.57	-1.07	-1.13	-1.16	-0.59	-0.49	-0.89 ± 0.32	-0.86	-1.04	-0.59	-0.77	-0.69	-0.79 ± 0.17	-	-	-	-	-	-	-	-	-	-	-	-	-	-	-	-	-	-	-	-	-	-	-	-	-
BcellWH2_02519	-0.74	-0.09	-0.76	-1.19	-1.11	-0.78 ± 0.43	-0.54	-0.87	-0.63	0	-0.19	-0.45 ± 0.35	-0.53	-1.12	-0.58	-0.52	-0.98	-0.75 ± 0.28	-0.78	0.88	-0.28	-0.86	-0.94	-0.4 ± 0.76	-0.26	0.69	0.46	-0.13	0.14	0.18 ± 0.4	0.02	-0.46	-0.48	-0.53	0.08	-0.23	-0.29 ± 0.28	-0.1	-0.89	0.46	-0.13	-0.14	-0.06	0.03 ± 0.29	0.66	-0.84	0.19	0.05	-0.21
BcellWH2_02520	-	-	-	-	-	-	-	-	-	-	-	-	-	-	-	-	-	-	-	-	-	-	-	-	0.55	0.29	0.42	-0.33	0.18	0.22 ± 0.34	-0.31	-0.39	-0.18	-0.62	-0.4	-0.32	-0.38 ± 0.18	1.11	0.3	-0.79	-0.13	0.02	0.24	-0.17 ± 0.45	0.14	-1.22	0.18	-0.33	-1.39
BcellWH2_02522	-	-	-	-	-	-	-	-	-	-	-	-	-	-	-	-	-	-	-	-	-	-	-	-	-0.07	-1.04	-0.97	-0.6	-0.74	-0.68 ± 0.39	-1.19	-0.8	-1.4	-1.37	-0.86	-0.73	-1.09 ± 0.34	-0.86	-0.36	-0.58	-0.31	-1.21	-0.95	-0.76 ± 0.4	-0.62	-0.7	-0.29	-0.84	-0.72
BcellWH2_02532	-	-	-	-	-	-	-	-	-	-	-	-	-	-	-	-	-	-	-	-	-	-	-	-	-0.83	-0.51	-0.81	-0.96	-1.09	-0.84 ± 0.22	-0.71	0.32	-0.36	-1.12	0.54	-0.78	-0.43 ± 0.72	-0.21	-0.79	-0.93	-1.38	-0.83	-1.24	-1.09 ± 0.26	-1.19	-1.22	-0.75	-0.78	-0.92
BcellWH2_02539	-	-	-	-	-	-	-	-	-	-	-	-	-	-	-	-	-	-	-	-	-	-	-	-	-1.14	-1.18	-0.55	-0.92	-0.64	-0.89 ± 0.28	-0.52	-0.75	-1.03	-1.11	-0.74	-0.55	-0.86 ± 0.26	-1.16	-0.83	-0.93	-0.79	-0.14	-0.67	-0.64 ± 0.34	-0.74	-0.7	-1.08	-0.78	-1.07
BcellWH2_02543	1.51	1.49	1.51	1.96	1.86	1.67 ± 0.23	1.49	1.72	1.49	1.41	1.64	1.55 ± 0.13	1.84	1.2	1.28	1.29	1.04	1.33 ± 0.3	1.9	1.87	2.21	1.85	2.23	2.01 ± 0.19	2.16	2.45	2.49	2.42	2.46	2.4 ± 0.14	2.25	1.79	1.99	2.06	2.32	2.32	2.17 ± 0.18	1.71	2.02	2.06	2.15	2.07	2.01	2.07 ± 0.06	2.3	1.96	2.37	2.31	1.95
BcellWH2_02544	1.18	0.39	-1.08	-1.17	0.65	-0.01 ± 1.06	0.14	0.35	0.19	-0.04	-0.2	0.09 ± 0.21	0.55	0.59	0.52	0.4	0.49	0.51 ± 0.07	-0.89	0.7	0.58	-0.28	0.55	0.13 ± 0.69	-0.71	0.94	0.37	0.52	0.12	0.25 ± 0.61	0.33	0.82	0.07	0.3	0.43	0.65	0.36 ± 0.25	-0.34	-1.21	0.71	-1.92	-0.07	-1.85	-0.78 ± 1.31	0.58	-1.03	0.73	0.44	-0.78
BcellWH2_02557	1.4	1.4	1.32	1.46	1.47	1.41 ± 0.06	1.23	1.07	0.82	0.63	0.93	0.94 ± 0.23	1.29	0.78	0.87	1.27	1.05	1.05 ± 0.23	0.5	1.19	1.31	1.53	1.39	1.18 ± 0.4	1.62	1.46	1.67	1.62	1.71	1.62 ± 0.09	1.39	1.48	1.03	1.27	1.34	1.31	1.24 ± 0.14	1.81	1.52	1.47	1.65	1.65	1.6	1.59 ± 0.09	1.53	1.77	1.55	1.69	1.45
BcellWH2_02558	0.89	0.7	0.74	0.37	-0.39	0.46 ± 0.51	-0.43	-0.49	-0.34	-0.07	-0.17	-0.3 ± 0.18	0.2	-0.05	-1.6	0.1	0.5	-0.17 ± 0.83	0.33	0.16	-0.65	0.59	-0.28	0.03 ± 0.5	1.22	-0.07	1.34	0.04	1.05	0.72 ± 0.68	0.15	0.82	0.14	0.1	0.48	0.73	0.36 ± 0.3	1.39	1.04	0.78	1.11	1.03	0.55	0.87 ± 0.26	1.1	1.07	0.43	0.37	1.31
BcellWH2_02559	-1.08	0.63	-0.92	-0.74	-0.8	-0.58 ± 0.69	-0.03	-1.13	-0.88	-1.44	-1.47	-0.99 ± 0.59	-0.95	-0.75	-0.73	0.42	-0.32	-0.47 ± 0.55	-0.74	-1.35	-0.84	-1.12	-0.48	-0.91 ± 0.34	0.98	0.07	0.92	-0.04	-0.19	0.35 ± 0.56	-1.42	-0.18	-0.13	-1.37	-0.62	-1.69	-0.95 ± 0.71	1.74	-1.33	0.02	0.09	-0.1	-0.5	-0.12 ± 0.26	0.34	1.19	0.61	-0.25	-0.12
BcellWH2_02560	-	-	-	-	-	-	-	-	-	-	-	-	-	-	-	-	-	-	-	-	-	-	-	-	-1.66	-0.88	-0.82	-1.42	-0.32	-1.02 ± 0.53	-0.86	-0.36	-0.71	-1.26	-0.84	-0.83	-0.91 ± 0.24	-0.35	-0.72	-0.54	-0.56	-0.74	-1.03	-0.72 ± 0.23	-0.6	-0.96	-0.96	-0.68	-1.08
BcellWH2_02586	-0.85	-0.31	0.58	-0.82	-0.01	-0.28 ± 0.59	-0.31	-0.85	-1.45	-0.76	-0.13	-0.7 ± 0.51	-0.83	-1.04	-0.7	-1.08	-0.96	-0.92 ± 0.16	-0.94	-0.37	-0.64	-0.68	-0.86	-0.7 ± 0.22	0.53	0.25	0.41	0.37	-0.06	0.3 ± 0.23	-0.8	-0.04	-0.29	-2.09	-0.61	-0.82	-0.95 ± 0.79	0.18	-0.03	-0.04	-0.44	-0.2	-0.18	-0.21 ± 0.17	0.21	0.05	-0.97	-0.49	0.42
BcellWH2_02587	0.14	-0.11	-0.7	-1.14	0.29	-0.3 ± 0.6	-0.49	-0.48	-1.58	-0.29	-0.52	-0.67 ± 0.52	-0.79	-1.01	-1.26	-0.39	0.02	-0.69 ± 0.51	-0.49	0.38	-0.87	0.41	-0.59	-0.23 ± 0.59	-0.71	-0.73	-0.61	-0.53	0.26	-0.47 ± 0.41	-0.07	-0.55	0.12	0.1	-0.95	-1.18	-0.48 ± 0.68	-0.92	-0.23	-0.86	-1.35	-1.15	-0.89	-1.06 ± 0.23	-1.08	-0.73	-0.98	-0.79	-1.3
BcellWH2_02588	-0.5	-0.04	-0.1	-0.31	0.06	-0.18 ± 0.23	-0.15	-0.81	-0.48	-0.93	-0.56	-0.59 ± 0.3	-0.11	-1.1	-0.59	0.38	-0.57	-0.4 ± 0.56	-0.47	-0.67	-0.19	-0.88	0.37	-0.37 ± 0.49	-0.85	-0.48	-1.02	-1.06	0.49	-0.58 ± 0.64	-0.8	-1.12	-1.54	-1.04	-1.12	-0.89	-1.15 ± 0.28	-0.76	0.15	-0.72	-1.15	-1.05	0.63	-0.57 ± 0.82	-0.82	-0.54	-1.09	-0.86	-0.91
BcellWH2_02610	1.1	-1.1	0.83	0.23	-0.22	0.17 ± 0.88	-0.61	-0.01	-0.61	-0.64	-0.85	-0.54 ± 0.32	-0.21	-0.13	0.84	-1.38	0.09	-0.16 ± 0.8	-0.35	0.51	-0.95	0.27	-1.39	-0.38 ± 0.8	0.62	-0.59	-1.05	0.12	-0.24	-0.23 ± 0.64	-0.98	-0.93	-0.28	-0.23	-0.85	-1.03	-0.6 ± 0.4	-0.32	-1.15	-0.47	-0.96	-1.3	-1.18	-0.98 ± 0.37	-0.83	-0.11	0.12	-1.11	-1.08
BcellWH2_02611	-	-	-	-	-	-	-	-	-	-	-	-	-	-	-	-	-	-	-	-	-	-	-	-	-1.03	-1.2	-0.71	-0.65	-0.79	-0.88 ± 0.23	-0.7	-0.62	-0.51	-0.7	-0.71	-0.51	-0.61 ± 0.11	-1.34	-0.87	-0.98	-0.33	-0.52	-1.37	-0.8 ± 0.47	-0.97	-0.78	-0.95	-1	-0.57
BcellWH2_02633	-0.54	-0.06	-1.25	-0.93	-0.83	-0.72 ± 0.45	-1.34	-1.18	-0.3	0.06	-0.06	-0.56 ± 0.65	-0.63	-1.12	-0.9	-0.91	-0.94	-0.9 ± 0.17	-0.83	0.06	-0.86	-0.61	-0.8	-0.61 ± 0.38	0.24	-0.04	-0.76	-0.77	-0.76	-0.42 ± 0.48	0.17	0.66	-0.06	-0.32	0.36	-0.59	-0.15 ± 0.41	-0.61	-0.96	-0.91	-1.27	-1.15	-1.35	-1.17 ± 0.19	-0.76	-0.74	-0.87	-1.04	-0.71
BcellWH2_02657	-	-	-	-	-	-	-	-	-	-	-	-	-	-	-	-	-	-	-	-	-	-	-	-	-0.9	-0.74	-0.86	-0.53	-0.63	-0.73 ± 0.15	-1.05	-0.1	-0.6	-0.69	-0.37	-0.96	-0.65 ± 0.24	-1.13	-1.02	-0.83	-0.64	-0.5	-0.81	-0.69 ± 0.16	-0.72	-0.41	-0.61	-0.28	-0.78
BcellWH2_02658	-0.82	0.66	-0.76	-0.52	-1.34	-0.56 ± 0.74	-1.24	-1.31	-0.42	0.47	-1.37	-0.77 ± 0.8	-1.31	-1.15	-0.42	-0.57	-1.05	-0.9 ± 0.38	-0.69	-1.36	-1.29	-0.55	-0.65	-0.91 ± 0.38	-0.1	0.06	0.42	-0.53	-0.27	-0.08 ± 0.36	-1.66	-0.56	0.02	-0.28	0.05	-0.15	-0.09 ± 0.15	0.6	-0.69	-0.66	-0.57	-1.19	-0.42	-0.71 ± 0.34	-1.06	0.94	-0.22	-0.91	0.36
BcellWH2_02662	-0.65	-0.86	-1.06	-0.84	-0.22	-0.73 ± 0.32	-0.44	0.16	-1.3	-1.25	-1.51	-0.87 ± 0.7	-0.55	-0.5	-0.58	-0.39	-0.72	-0.55 ± 0.12	-0.64	-0.09	-0.91	-0.77	-0.05	-0.49 ± 0.39	0.08	0.49	-0.86	-0.98	-1.17	-0.49 ± 0.73	-0.48	0.03	-0.12	-0.55	0.02	-1.2	-0.46 ± 0.55	-0.53	-0.54	-0.21	-1.35	-1.25	-0.93	-0.94 ± 0.51	-0.84	-0.95	0.22	-0.73	-1.06
BcellWH2_02674	-	-	-	-	-	-	-	-	-	-	-	-	-	-	-	-	-	-	-	-	-	-	-	-	-0.86	-0.93	-0.59	-0.88	-0.7	-0.79 ± 0.14	-1.08	-0.79	-0.18	-1.02	-0.58	-0.96	-0.69 ± 0.39	-0.7	-0.54	-0.69	-0.87	-1.06	-0.53	-0.79 ± 0.23	-1.2	-0.67	-0.65	-0.86	-0.47
BcellWH2_02679	1.12	1.22	1.34	1.01	0.91	1.12 ± 0.17	0.81	0.77	0.77	0.85	0.8	0.8 ± 0.03	0.49	1.25	1.2	1.13	1.25	1.07 ± 0.32	1.55	1.47	0.91	1.04	1.21	1.24 ± 0.28	1.27	1.39	1.53	1.42	1.44	1.41 ± 0.09	1.27	0.91	1.26	1.21	1.22	1.19	1.22 ± 0.03	1.48	1.38	1.25	1.26	1.26	1.26	1.26 ± 0	1.23	1.46	1.19	1.21	1.35
BcellWH2_02681	-0.96	-1.2	-0.87	-0.6	-0.52	-0.83 ± 0.28	-0.13	-1.26	-1.22	0.28	-0.2	-0.51 ± 0.7	-0.67	-1.32	-0.95	-1	-0.91	-0.97 ± 0.23	-0.79	-1.55	-0.92	-0.7	-0.64	-0.92 ± 0.37	-0.84	-1	-0.58	-0.73	-0.83	-0.8 ± 0.15	-0.08	-1.02	0.25	-1.14	-0.69	-1.01	-0.65 ± 0.63	-0.31	-1.33	-0.64	0.02	-0.47	-1.25	-0.58 ± 0.52	-0.68	-1.18	-0.6	-0.34	0.02
BcellWH2_02689	-0.54	0.16	-0.8	-1.04	-1.16	-0.67 ± 0.52	-0.64	0.21	-0.05	-0.32	-1.05	-0.37 ± 0.49	-1.35	-1.39	-0.68	0.19	-0.82	-0.81 ± 0.64	-0.34	-0.5	-0.42	-0.63	-0.55	-0.49 ± 0.11	-	-	-	-	-	-	-	-	-	-	-	-	-	-	-	-	-	-	-	-	-	-	-	-	-
BcellWH2_02694	-1.26	-1.1	-0.51	-0.91	-0.79	-0.91 ± 0.29	-0.95	-0.45	-1.23	-0.68	-1.32	-0.93 ± 0.36	-0.6	-1.3	-0.9	-0.86	-1.02	-0.94 ± 0.26	-0.83	-0.9	-1.14	-0.79	-0.61	-0.86 ± 0.19	-0.59	-0.99	-1.08	-1.11	-0.96	-0.95 ± 0.21	-0.65	-0.85	-0.95	-0.9	-0.87	-0.49	-0.8 ± 0.21	-1.25	-0.62	-0.6	-0.58	-0.67	-0.73	-0.64 ± 0.07	-0.86	-0.85	-0.87	-0.81	-0.72
BcellWH2_02696	-	-	-	-	-	-	-	-	-	-	-	-	-	-	-	-	-	-	-	-	-	-	-	-	-0.88	-0.63	-0.75	-0.75	-1.25	-0.85 ± 0.24	-0.23	-1.01	-1.27	-1.25	-1.26	-0.27	-1.01 ± 0.5	-1.11	-0.86	-1.19	-1.12	-0.45	-0.57	-0.83 ± 0.38	-0.38	-0.58	-0.96	-0.95	-0.52
BcellWH2_02699	-	-	-	-	-	-	-	-	-	-	-	-	-	-	-	-	-	-	-	-	-	-	-	-	-0.71	-0.6	-0.99	-1	-0.71	-0.8 ± 0.18	-0.92	-1.15	-0.27	-1.17	-0.84	-0.79	-0.77 ± 0.37	-0.82	-0.5	-0.63	-0.89	-0.26	-0.79	-0.64 ± 0.28	-0.72	-0.87	-0.44	-0.69	-0.64
BcellWH2_02703	-	-	-	-	-	-	-	-	-	-	-	-	-	-	-	-	-	-	-	-	-	-	-	-	-0.79	-0.85	-0.62	-1.16	-1.24	-0.93 ± 0.26	-0.55	-0.44	-0.08	-1.42	-0.61	-0.92	-0.76 ± 0.56	-0.85	-0.55	-0.82	-1	-0.55	-1.08	-0.86 ± 0.23	-0.69	-0.84	-0.64	-0.69	-0.86
BcellWH2_02706	-0.66	-0.71	-0.63	-0.56	-1.02	-0.72 ± 0.18	-0.24	-0.97	-1.07	-0.03	-1.55	-0.77 ± 0.63	-0.8	-1.09	-1.09	-1.13	-0.91	-1 ± 0.14	-0.98	-1.3	-1.06	-0.95	-0.97	-1.05 ± 0.15	-0.47	-0.08	-0.81	-0.43	-1.23	-0.6 ± 0.44	-0.92	-0.44	-0.3	-0.03	-1.13	-0.99	-0.61 ± 0.53	-0.6	-0.41	-0.79	-0.35	-0.7	-0.72	-0.64 ± 0.19	-0.74	-0.68	-1.01	-0.61	0.37
BcellWH2_02707	-	-	-	-	-	-	-	-	-	-	-	-	-	-	-	-	-	-	-	-	-	-	-	-	-0.56	-0.76	-0.74	-1.02	-0.75	-0.77 ± 0.17	-0.46	-1.05	-1.01	-0.5	-0.82	-0.95	-0.82 ± 0.23	-0.79	-0.71	-0.8	-0.83	0.09	-0.58	-0.53 ± 0.43	-0.82	-0.93	-0.9	-0.88	-0.19
BcellWH2_02716	-0.63	-1.09	-0.92	-0.74	-1.13	-0.9 ± 0.22	-0.23	-0.76	-0.92	-1.07	-0.96	-0.79 ± 0.33	-0.97	-0.82	-0.56	-0.87	-0.85	-0.81 ± 0.15	-1.35	-0.86	-0.8	-1.21	-1.04	-1.05 ± 0.23	-	-	-	-	-	-	-	-	-	-	-	-	-	-	-	-	-	-	-	-	-	-	-	-	-
BcellWH2_02724	0.09	0.57	0.25	0.74	0.48	0.43 ± 0.26	-0.06	-2.03	-0.12	-0.16	-0.19	-0.51 ± 0.85	-1.18	0.6	0.56	0.34	0.57	0.18 ± 0.77	-0.48	0.79	0.77	0.98	-1.4	0.13 ± 1.04	0.41	0.31	0.78	1.35	0.83	0.74 ± 0.41	0.33	0.13	0.08	-0.27	-1.6	-0.26	-0.51 ± 0.74	0.22	0.94	0.85	0.22	-0.03	-0.18	0.21 ± 0.45	0.74	0.77	0.57	0.46	0.39
BcellWH2_02725	1.49	0.03	0.3	0.71	0.68	0.64 ± 0.55	-0.33	-0.33	-1.63	-0.65	-1.23	-0.83 ± 0.58	-1.13	0.51	-0.22	-0.17	0.48	-0.11 ± 0.67	0.99	-0.47	-0.06	0.19	-0.13	0.1 ± 0.55	1.09	0.75	0.41	0.77	1.19	0.84 ± 0.31	0.73	-0.76	0.14	0.22	0.07	0.24	0.17 ± 0.08	1.08	1.44	0.85	0.56	0.76	0.44	0.65 ± 0.19	0.96	1.17	1.1	1	0.79
BcellWH2_02726	0.83	0.87	0.73	-0.05	0.23	0.52 ± 0.41	-0.01	-0.91	-0.72	-1.29	-0.4	-0.67 ± 0.49	-0.88	0.96	0.8	-0.2	0.35	0.21 ± 0.76	0.64	0.76	0.12	0.36	0.44	0.46 ± 0.25	1.48	1.35	1.07	1.58	1.29	1.35 ± 0.2	0.75	-1.33	0.24	0.08	-0.04	0.12	0.1 ± 0.12	0.96	1.52	0.91	1.1	0.88	0.8	0.92 ± 0.12	0.5	1.07	0.97	0.88	0.99
BcellWH2_02731	-0.69	-0.3	-1	-1.29	0.31	-0.59 ± 0.62	-0.39	-1.02	-1.14	-0.23	0.14	-0.53 ± 0.54	-0.99	-0.42	-0.45	0.41	-0.57	-0.4 ± 0.51	-0.79	-0.71	-1.03	-0.66	-0.68	-0.77 ± 0.15	0.45	-0.47	-0.89	-0.61	0.14	-0.27 ± 0.55	-0.94	-1.23	-1.35	-0.49	-0.59	-0.8	-0.81 ± 0.39	-0.53	-0.88	-0.39	0.06	-0.98	1.11	-0.05 ± 0.88	-0.68	-0.11	-1.11	-1.39	-0.46
BcellWH2_02762	0.19	0.08	-0.01	0.48	-0.03	0.14 ± 0.21	-0.16	-0.69	-0.63	-0.77	-0.34	-0.52 ± 0.26	-0.31	-0.3	-0.94	0.07	-0.37	-0.37 ± 0.37	0.04	-0.09	0.11	-1.05	0.16	-0.17 ± 0.5	-0.03	0.53	0.51	0.61	0.27	0.38 ± 0.26	-0.11	-0.22	0.03	-0.42	-0.19	-0.4	-0.24 ± 0.21	-0.5	0.11	-0.08	0.21	-0.12	0.05	0.01 ± 0.15	-0.1	-0.18	-1.24	0.03	0.08
BcellWH2_02797	-0.33	0.22	-0.59	-0.96	-0.92	-0.52 ± 0.49	-0.19	-0.37	-0.52	-0.86	-0.58	-0.5 ± 0.25	-0.45	-0.92	-0.99	0.08	-0.39	-0.53 ± 0.43	-0.36	0.24	-0.58	-0.75	-0.33	-0.35 ± 0.38	-0.73	-0.54	-0.92	0.33	-0.74	-0.52 ± 0.49	-0.29	-1.52	-0.15	-0.25	-0.11	0.09	-0.11 ± 0.14	0.74	-0.61	0.27	-0.35	0.25	-0.22	-0.01 ± 0.32	-0.83	-0.23	-0.7	-0.4	0.69
BcellWH2_02801	-	-	-	-	-	-	-	-	-	-	-	-	-	-	-	-	-	-	-	-	-	-	-	-	-0.78	-1.26	-0.68	-0.88	-1.24	-0.97 ± 0.26	-0.5	-0.53	-0.61	-0.9	-0.51	-0.24	-0.56 ± 0.27	-1.21	-0.82	-0.87	-1.19	-0.02	-0.73	-0.7 ± 0.49	-1.08	-0.5	-0.32	-0.57	-0.6
BcellWH2_02808	0.62	-0.98	-1.2	0.58	0.6	-0.08 ± 0.93	-0.27	0.17	-1.5	-0.94	-0.08	-0.53 ± 0.68	-0.77	-0.14	-0.58	-1.52	-0.73	-0.75 ± 0.5	-0.39	-0.59	-0.84	-1.04	0.67	-0.44 ± 0.67	0.93	0.48	0.35	1.46	0.14	0.67 ± 0.53	0.51	0.07	0.14	0.18	0.12	0.53	0.24 ± 0.19	0.46	0.46	0.36	-0.12	0.38	0.59	0.3 ± 0.3	0.14	0.28	0.12	0.28	-1.48
BcellWH2_02818	-	-	-	-	-	-	-	-	-	-	-	-	-	-	-	-	-	-	-	-	-	-	-	-	-0.15	-0.1	-0.33	-0.56	-0.43	-0.31 ± 0.19	-1.05	0.35	0.03	-0.57	-1.27	-0.02	-0.46 ± 0.6	-0.24	-0.88	-0.19	-1.25	-1.42	-0.86	-0.93 ± 0.55	-0.94	0.17	-0.08	0.12	-0.86
BcellWH2_02820	-0.41	-1.83	-1.47	0.19	0.87	-0.53 ± 1.13	-0.56	0.13	-0.58	-1.1	-1.28	-0.68 ± 0.55	-1.07	-0.58	-0.61	0.32	1.44	-0.1 ± 1	-0.01	0.13	-0.81	0.1	1.42	0.17 ± 0.8	-	-	-	-	-	-	-	-	-	-	-	-	-	-	-	-	-	-	-	-	-	-	-	-	-
BcellWH2_02821	-1.04	-1.34	0.34	0.55	-0.26	-0.35 ± 0.83	-0.09	-0.13	-1.34	-0.02	-0.27	-0.37 ± 0.55	-1.08	-1.34	-0.83	-0.39	-1.15	-0.96 ± 0.36	-1.25	0.22	-0.6	-0.43	0.64	-0.28 ± 0.74	1.08	-0.51	0.61	1.33	0.43	0.59 ± 0.71	-1.46	-0.9	-1.16	-1.15	-0.07	0.04	-0.58 ± 0.66	0.65	-1.08	0.62	-0.48	-0.06	-0.89	-0.2 ± 0.65	0.47	0.59	0.11	-1.51	-0.96
BcellWH2_02838	-	-	-	-	-	-	-	-	-	-	-	-	-	-	-	-	-	-	-	-	-	-	-	-	-0.42	-0.64	-0.84	-0.85	-0.33	-0.62 ± 0.24	-1.08	-0.78	-0.71	-0.52	-0.84	-0.96	-0.76 ± 0.19	-0.54	-0.6	-0.73	-0.21	-0.75	-0.89	-0.64 ± 0.3	-0.54	-0.85	-0.9	-0.19	-0.78
BcellWH2_02840	-	-	-	-	-	-	-	-	-	-	-	-	-	-	-	-	-	-	-	-	-	-	-	-	-0.72	-0.72	0.15	-0.76	-1.16	-0.64 ± 0.48	-0.94	-0.88	-1.01	-1.13	-1.04	-0.89	-1.02 ± 0.1	-1.05	-0.88	-0.73	-1.25	-0.3	-0.4	-0.67 ± 0.43	-1.08	0.15	-0.88	-0.98	0.04
BcellWH2_02842	0.09	-0.5	-1.08	-0.33	-0.55	-0.47 ± 0.42	-0.93	-0.57	-0.97	0.08	-1	-0.68 ± 0.46	-0.93	0.08	-0.97	-1.16	-0.79	-0.75 ± 0.48	-1.14	-0.78	0.08	-0.25	-0.13	-0.45 ± 0.5	-0.45	0.82	0.83	1.73	-0.24	0.54 ± 0.89	-0.43	0.09	-0.37	-0.41	-1.06	-1.45	-0.82 ± 0.52	0.07	-0.32	-0.69	-0.15	-1.02	-0.88	-0.69 ± 0.38	-0.1	0.16	-0.39	-0.29	-0.04
BcellWH2_02843	-0.87	-0.87	-0.73	-0.56	-0.53	-0.71 ± 0.16	-1.15	-1.11	-0.53	-0.81	-1.52	-1.02 ± 0.38	-1.14	-1.05	-1.21	-0.61	-1.15	-1.03 ± 0.24	-0.97	-0.98	-0.9	-1.37	-0.83	-1.01 ± 0.21	-0.93	0.42	-0.57	-1.01	-0.91	-0.6 ± 0.59	-1	-0.77	-1.49	-0.13	-0.73	0.08	-0.57 ± 0.71	-1	-0.95	-0.25	-1.38	-0.94	-0.35	-0.73 ± 0.53	-0.81	-0.61	-0.27	-0.89	-1.03
BcellWH2_02844	1.23	0.11	-1.42	0.79	-0.11	0.12 ± 1.01	-0.66	-0.48	-0.16	-0.84	-0.65	-0.56 ± 0.25	-1.32	-0.91	-1.31	0.15	0.45	-0.59 ± 0.83	-0.08	1.5	-0.68	0.64	0.29	0.34 ± 0.82	-0.72	0.95	-0.97	-1.29	-0.76	-0.56 ± 0.87	-0.68	-1.03	-1.29	-1.41	-1.05	-0.55	-1.08 ± 0.38	-0.62	-0.7	-0.98	-1.09	-0.78	-0.94	-0.94 ± 0.13	-1.18	1.4	-0.85	-0.89	-0.39
BcellWH2_02845	-0.61	-1.28	-1.12	-0.9	0.09	-0.76 ± 0.54	0.23	-0.24	-1.31	-0.22	-0.2	-0.35 ± 0.57	-1.19	-1.2	-0.18	-0.9	-0.99	-0.89 ± 0.42	-1.03	-1.05	-0.77	-0.41	-0.76	-0.8 ± 0.26	-0.73	-0.55	-0.94	-0.42	-1.03	-0.73 ± 0.26	0.08	-0.6	-0.09	-0.03	-0.09	0.33	0.03 ± 0.2	-0.25	-0.81	-1	-0.14	-1.14	0.52	-0.44 ± 0.78	-0.4	-0.9	0.62	-0.12	-0.84
BcellWH2_02846	-	-	-	-	-	-	-	-	-	-	-	-	-	-	-	-	-	-	-	-	-	-	-	-	0.08	-0.11	0.1	0.86	-0.05	0.18 ± 0.39	-0.53	-0.61	-0.76	-0.77	-0.63	-0.54	-0.68 ± 0.11	-0.33	-0.22	-0.88	-0.88	-0.3	0.29	-0.44 ± 0.56	-0.97	0.13	-0.51	0.08	-0.2
BcellWH2_02848	-1.07	0.36	0.45	-0.8	0.32	-0.15 ± 0.73	-0.47	-0.11	-0.97	-1.48	-0.67	-0.74 ± 0.52	-1.35	-0.64	-0.25	-1.13	-0.74	-0.82 ± 0.43	-0.54	-1.17	-0.7	-0.75	0.78	-0.47 ± 0.74	0.68	-0.7	-0.15	-0.21	0.12	-0.05 ± 0.51	-0.04	-0.48	-0.07	-0.35	-0.73	-0.17	-0.33 ± 0.29	-0.51	-0.04	0.12	-0.26	-0.48	-0.2	-0.2 ± 0.25	-1.05	0.57	-0.02	-0.72	0.25
BcellWH2_02849	-	-	-	-	-	-	-	-	-	-	-	-	-	-	-	-	-	-	-	-	-	-	-	-	-0.53	-0.85	-1.44	-0.91	-0.43	-0.83 ± 0.4	-0.86	-0.64	-0.13	-0.72	-0.87	-0.32	-0.51 ± 0.34	-1.17	-0.77	-1.2	-1.13	-1.13	-0.86	-1.08 ± 0.15	-0.92	-0.84	-0.61	-0.47	-0.09
BcellWH2_02850	-0.91	-0.39	1.1	0.93	1.08	0.36 ± 0.94	1.09	1.54	1.53	1.45	1.11	1.35 ± 0.22	2.05	1.79	1.18	0.79	1.53	1.47 ± 0.5	2.13	0.84	1.25	1.36	1.43	1.4 ± 0.46	1.75	2.25	2.41	2.01	2.32	2.15 ± 0.27	2.3	1.84	2.26	2.29	2.46	2.2	2.3 ± 0.11	2.19	2.31	2.04	2.31	2.37	2.47	2.3 ± 0.18	2.34	2.2	2.44	2.42	2.62
BcellWH2_02851	-0.11	-0.67	-0.9	-0.61	-0.41	-0.54 ± 0.3	-1.35	-0.89	-0.86	-1.11	-1.62	-1.17 ± 0.32	-1.19	-0.68	-0.69	-1.22	-0.95	-0.95 ± 0.26	-1.08	-0.43	-0.87	-0.9	-1.12	-0.88 ± 0.27	-0.94	-1.08	-1.01	-0.73	-0.69	-0.89 ± 0.17	-0.6	-1.05	0.17	-0.6	-1.23	-0.71	-0.59 ± 0.58	-0.74	-0.59	-0.59	-0.37	-1.27	-0.3	-0.63 ± 0.44	-0.6	-0.8	-0.63	-0.63	-0.85
BcellWH2_02863	-0.7	-1.2	-0.64	-0.72	-0.81	-0.81 ± 0.23	-0.58	-0.22	-1.12	-0.91	-0.76	-0.72 ± 0.34	-0.52	-0.78	-1.2	-0.2	-0.8	-0.7 ± 0.37	-0.43	-1.07	-0.49	-0.64	-0.44	-0.61 ± 0.27	-1.15	-0.77	0.02	-0.34	0.06	-0.44 ± 0.52	-0.39	-0.11	-0.32	-0.27	-1.54	-0.4	-0.63 ± 0.61	0.11	-1.09	-0.51	0.16	-1.48	-1.37	-0.8 ± 0.77	0.05	-0.61	-0.11	0.16	0.16
BcellWH2_02866	-0.63	0.36	0.9	0.54	-0.99	0.04 ± 0.81	-0.23	0.49	-0.19	0.42	0.48	0.19 ± 0.37	0.56	0.62	0.87	0.12	0.6	0.55 ± 0.27	1.19	1.08	-0.84	0.14	-0.42	0.23 ± 0.89	1.44	1.36	1.44	1.11	1.34	1.34 ± 0.13	1.3	1.13	1.19	1.19	1.02	1.33	1.18 ± 0.13	1.58	1.67	1.57	1.55	1.46	1.49	1.52 ± 0.05	1.67	1.7	1.63	1.5	1.51
BcellWH2_02878	-	-	-	-	-	-	-	-	-	-	-	-	-	-	-	-	-	-	-	-	-	-	-	-	-0.62	-0.77	-0.98	-1.66	-0.66	-0.94 ± 0.43	1.12	-1.08	-1.18	-0.87	-1.07	-1.7	-1.2 ± 0.35	-0.94	-1.07	-0.49	-0.13	-0.2	-0.84	-0.42 ± 0.32	-1.05	-1.21	-0.67	-0.17	-0.77
BcellWH2_02883	-	-	-	-	-	-	-	-	-	-	-	-	-	-	-	-	-	-	-	-	-	-	-	-	-0.82	-1	-0.76	-0.51	-1.03	-0.82 ± 0.21	-0.76	0.11	-1.06	-0.98	-0.76	-0.85	-0.91 ± 0.13	-0.96	-0.64	-1.05	-0.15	-0.81	-0.89	-0.73 ± 0.4	-0.92	-1.06	-0.96	-0.95	-1.33
BcellWH2_02892	-0.7	0.02	0.5	-0.58	-1.11	-0.37 ± 0.63	-0.44	-0.19	0.3	0.03	-0.11	-0.08 ± 0.27	0.7	0.05	-1.43	0.24	-1.13	-0.31 ± 0.92	1.13	-0.88	0.77	-0.85	0.43	0.12 ± 0.93	0.97	-0.37	-1.06	-0.39	0.28	-0.11 ± 0.77	-0.6	-0.4	-0.21	-0.24	-0.76	-0.73	-0.48 ± 0.3	0.91	1.06	-0.31	-0.07	0.37	-0.08	-0.02 ± 0.29	-1.27	0.7	-1.32	-0.85	0.48
BcellWH2_02896	-0.89	-1.04	-0.62	-1.32	-0.76	-0.93 ± 0.27	-1.44	-0.93	-0.34	-0.96	-1.11	-0.95 ± 0.4	-0.82	-0.51	-0.76	-0.78	-0.99	-0.77 ± 0.17	-1.2	-1.01	-1.24	-1.04	-0.59	-1.01 ± 0.26	-0.55	-0.75	-1.08	-0.28	-1.09	-0.75 ± 0.35	0.1	-1.03	-0.11	0.33	-0.12	-0.46	-0.09 ± 0.33	-0.34	-1	-0.93	-0.54	-0.13	-0.65	-0.56 ± 0.33	-0.09	-1.13	-0.96	-1.37	-0.29
BcellWH2_02904	-1.12	-0.93	-1.31	-0.6	-1.15	-1.02 ± 0.27	-1.28	0.34	-0.92	-0.7	0.08	-0.5 ± 0.69	-1.12	-0.75	-0.79	-0.1	-0.83	-0.72 ± 0.37	-1.45	-0.54	-0.78	-1.14	-0.64	-0.91 ± 0.38	-0.2	-0.05	-0.29	0.16	-0.58	-0.19 ± 0.28	-0.52	0.33	0.13	-0.17	0.44	0.58	0.24 ± 0.34	-0.21	-0.57	-0.67	-0.8	-0.76	-0.88	-0.78 ± 0.09	-0.85	-0.5	-0.61	0.01	-1.34
BcellWH2_02906	-	-	-	-	-	-	-	-	-	-	-	-	-	-	-	-	-	-	-	-	-	-	-	-	-0.85	-0.91	-0.99	-0.69	-0.93	-0.87 ± 0.11	-0.57	-0.46	-1.5	-0.82	-0.6	-0.34	-0.82 ± 0.5	-1.02	-1.05	-0.72	-0.88	-0.66	-1.15	-0.85 ± 0.22	-1.09	-0.65	-1.07	-1.07	-0.91
BcellWH2_02907	2.12	2.64	1.88	2.15	2.17	2.19 ± 0.27	2.16	2.03	2.2	2.04	2.05	2.1 ± 0.08	2.14	1.9	2.05	2.3	2.12	2.1 ± 0.15	2.27	2.28	2.22	2.22	2.28	2.25 ± 0.03	2.19	1.99	2.23	2.28	2.29	2.2 ± 0.12	2.22	1.61	2.18	2.27	1.97	2.13	2.13 ± 0.12	2.3	2.29	2.38	2.37	2.22	2.37	2.33 ± 0.08	2.4	2.36	2.32	2.26	2.45
BcellWH2_02908	0.03	1.17	-0.07	0.61	1.17	0.58 ± 0.6	0.59	0.72	0.69	0.59	0.59	0.64 ± 0.06	1.33	1.04	1.06	1.29	1.15	1.17 ± 0.13	1.65	1.06	0.79	0.97	0.82	1.06 ± 0.35	1.31	1.58	1.63	2.05	1.5	1.62 ± 0.27	1.26	1.48	1.23	1.2	1.17	1.39	1.24 ± 0.1	1.52	1.1	1.58	1.1	0.9	1.14	1.18 ± 0.28	1.46	0.9	1.39	1.51	1.47
BcellWH2_02910	-0.73	0.18	0.02	-0.63	-1.23	-0.48 ± 0.58	-0.4	0.2	-0.82	-1.54	-1.92	-0.9 ± 0.85	0.13	0.42	0.5	-1.18	-1.02	-0.23 ± 0.81	0.53	-0.97	-0.76	-0.71	-0.91	-0.56 ± 0.62	0.15	-0.7	-0.7	-0.12	-0.5	-0.37 ± 0.38	-0.91	0.32	-0.13	-0.75	0.36	-0.58	-0.27 ± 0.5	-0.34	-1.38	0.55	-0.64	-1.21	-0.05	-0.33 ± 0.76	0.51	0.39	0.21	-0.22	-0.27
BcellWH2_02911	2.02	1.59	1.54	1.57	1.83	1.71 ± 0.21	2.1	2.16	2.16	2.19	2.21	2.16 ± 0.04	2.03	2.15	2.41	2.13	2.53	2.25 ± 0.21	2.13	2.31	2.04	2.24	1.96	2.13 ± 0.15	1.7	1.78	1.87	1.44	2.1	1.78 ± 0.24	2.24	2.06	2.3	2.32	2.14	2.37	2.28 ± 0.1	2.43	2.17	2.15	2.22	2.17	2.29	2.2 ± 0.06	2.29	2.19	2.27	2.32	2.4
BcellWH2_02912	2.42	2.57	2.81	2.73	2.82	2.67 ± 0.17	2.85	2.97	2.82	2.78	2.78	2.84 ± 0.08	2.71	2.67	2.75	2.81	2.8	2.75 ± 0.06	2.65	2.86	2.9	2.9	2.87	2.83 ± 0.11	2.74	2.99	2.9	2.78	3.03	2.89 ± 0.12	2.89	2.98	2.8	2.94	2.93	3.13	2.95 ± 0.14	2.75	2.85	2.81	2.92	2.8	2.97	2.88 ± 0.08	2.87	2.86	3.11	2.99	2.97
BcellWH2_02913	1.26	1.48	1.29	1.31	1.53	1.37 ± 0.12	1.41	1.29	1.11	1.07	1.04	1.19 ± 0.16	1.24	1.13	0.89	1.64	0.43	1.06 ± 0.45	0.86	0.98	1.37	1.38	1.5	1.22 ± 0.28	1.07	1.59	0.97	1.34	1.58	1.31 ± 0.29	1.18	-0.49	0.24	1.36	1.34	1.03	0.99 ± 0.52	1.28	1	1.23	1.08	1.04	1.21	1.14 ± 0.09	1.35	0.94	1.29	1.31	0.77
BcellWH2_02914	-	-	-	-	-	-	-	-	-	-	-	-	-	-	-	-	-	-	-	-	-	-	-	-	-0.88	-0.95	-0.89	-0.69	-1.24	-0.93 ± 0.2	-1.11	-1.07	-0.14	-0.81	-0.92	-0.54	-0.6 ± 0.35	-0.82	-0.7	-0.52	-0.53	-0.76	-1.02	-0.71 ± 0.23	-0.73	-0.65	0.89	0.46	-0.89
BcellWH2_02915	1.52	1.7	1.53	1.56	1.66	1.59 ± 0.08	1.6	1.56	1.49	1.41	1.34	1.48 ± 0.1	1.54	1.41	1.43	1.73	1.75	1.57 ± 0.16	1.03	1.75	1.41	1.66	1.76	1.52 ± 0.31	1.61	1.72	1.72	1.61	1.31	1.59 ± 0.17	1.57	1.41	1.48	1.6	1.35	1.39	1.45 ± 0.11	1.81	1.46	1.4	1.52	1.49	1.46	1.47 ± 0.05	1.44	1.84	1.87	1.64	1.43
BcellWH2_02919	-	-	-	-	-	-	-	-	-	-	-	-	-	-	-	-	-	-	-	-	-	-	-	-	0.87	-0.36	-0.62	-0.9	-1.21	-0.45 ± 0.8	-1.46	0.15	-1.75	-0.06	-1.23	0.17	-0.72 ± 0.92	1.38	-1.05	1.52	-1.33	0.07	-0.8	-0.14 ± 1.24	1.25	-0.15	0.22	-1.39	-0.95
BcellWH2_02922	1.36	0.09	1.32	1.65	0.49	0.98 ± 0.66	0.15	1.22	1.01	-0.25	0.06	0.44 ± 0.64	1.33	0.16	0.38	0.39	-0.12	0.43 ± 0.54	0.78	1.26	0.68	-0.32	1.52	0.78 ± 0.71	-1.15	-0.01	0.5	0.75	0.98	0.21 ± 0.85	0.48	0.57	0.54	0.64	0.54	0.62	0.59 ± 0.05	0.64	0.15	-0.02	0.49	0.58	0.58	0.41 ± 0.29	0.54	0.1	0.81	0.64	0.72
BcellWH2_02924	-0.83	1.01	2.29	1.84	1.76	1.21 ± 1.23	1.08	1.81	1.95	1.5	1.36	1.54 ± 0.35	0.36	0.96	1.71	1.28	1.64	1.19 ± 0.55	0.34	0.63	1.99	1.5	0.3	0.95 ± 0.75	1.86	1.79	1.77	1.79	1.46	1.73 ± 0.16	1.78	1.77	1.72	1.43	1.64	1.72	1.63 ± 0.14	1.76	1.77	1.78	1.39	1.51	1.4	1.52 ± 0.18	1.79	1.75	1.8	1.78	1.88
BcellWH2_02925	-1.28	-0.7	-0.7	-1.03	-1.08	-0.96 ± 0.26	-1.06	-0.73	-0.81	-0.7	-0.96	-0.85 ± 0.15	-1.37	-1.12	-1.02	-0.94	-1.04	-1.1 ± 0.17	-0.83	-1.86	-1.76	-0.94	-0.53	-1.18 ± 0.59	-0.89	-1.23	-0.73	-0.68	-0.77	-0.86 ± 0.22	-0.48	0.62	0.36	0.07	0.47	-0.38	0.13 ± 0.38	-1.08	-1.18	-1.13	0.04	-0.94	-1.4	-0.86 ± 0.63	-0.89	-0.86	-0.94	-0.57	-0.72
BcellWH2_02926	-0.55	-0.09	-1.17	0.11	0.12	-0.32 ± 0.55	-0.07	0.03	0.02	-0.3	0	-0.07 ± 0.14	0.11	-1.15	0.2	0.18	-0.01	-0.13 ± 0.58	0.02	-0.79	-0.18	-0.81	-1.15	-0.58 ± 0.49	-0.65	-1.08	-0.86	-0.26	-0.65	-0.7 ± 0.31	-1.19	0.46	0.07	0.03	0.25	-1.21	-0.22 ± 0.67	-0.59	-0.96	0.4	-0.04	-0.59	-0.51	-0.19 ± 0.46	-0.5	-0.74	0.23	-0.56	0.48
BcellWH2_02944	0.12	-1.12	0.69	-0.69	0.35	-0.13 ± 0.75	0.45	0.12	0.42	0.19	-0.11	0.21 ± 0.23	-1.27	-1.19	0.51	-1.24	0.66	-0.51 ± 1	0.17	0.57	0.43	-1.04	0.44	0.11 ± 0.66	-0.17	-0.75	0.61	-0.83	-0.99	-0.42 ± 0.66	0.64	-0.7	-0.13	-0.2	0.22	-0.95	-0.26 ± 0.49	-0.32	-0.74	-0.3	-0.32	0.11	-0.67	-0.29 ± 0.32	-0.83	-0.76	-0.73	-0.55	-1.21
BcellWH2_02945	2.32	0.27	-0.52	0.17	-0.2	0.41 ± 1.11	0.26	0.13	-0.21	0.03	0.13	0.07 ± 0.18	0.17	0.18	0.32	-0.16	0.27	0.16 ± 0.19	0.43	0.11	-0.14	0.17	0.49	0.21 ± 0.26	0.76	0.64	0.34	-0.48	0.04	0.26 ± 0.5	0.3	0.29	0.15	-0.32	-0.01	0.11	-0.01 ± 0.21	0.34	-0.06	-0.12	-0.16	-1.46	0.66	-0.27 ± 0.88	-0.83	-0.23	-0.59	-0.25	-0.09
BcellWH2_02947	-1.18	-0.1	-0.83	0.16	0.16	-0.36 ± 0.61	-0.14	-0.04	-0.04	-0.1	-0.15	-0.09 ± 0.05	-0.98	-0.95	-0.89	-1.11	-0.9	-0.97 ± 0.09	-0.65	-0.09	-0.5	0.77	0.28	-0.04 ± 0.58	0.51	0.76	0.44	-0.34	0.1	0.3 ± 0.42	-0.1	-1.32	-0.26	-0.35	0.34	-0.68	-0.24 ± 0.42	-0.36	-0.28	0.44	-1.38	-0.06	0.08	-0.23 ± 0.8	0.2	-0.76	-0.28	-0.34	-0.45
BcellWH2_02949	-1.03	-1.04	-0.95	-0.93	-1.18	-1.03 ± 0.1	-1.36	-0.97	-0.84	0.15	-1.25	-0.86 ± 0.6	-0.64	-0.76	-0.71	-0.56	-0.9	-0.71 ± 0.13	-0.74	-0.87	-0.67	-0.7	-0.54	-0.7 ± 0.12	-0.9	-0.97	-1	-1.45	-0.93	-1.05 ± 0.23	-0.76	-0.72	-0.72	-0.38	-0.99	-0.91	-0.75 ± 0.27	-0.95	-1.09	-0.35	-1.28	-0.97	-0.78	-0.85 ± 0.39	-0.71	-1.21	-0.6	-0.77	-1.24
BcellWH2_02950	-	-	-	-	-	-	-	-	-	-	-	-	-	-	-	-	-	-	-	-	-	-	-	-	-0.57	-0.58	-0.7	0.26	-1.38	-0.59 ± 0.58	-0.31	-0.95	-0.24	-0.43	-0.92	-1.2	-0.7 ± 0.44	-0.5	-0.67	-0.66	0.15	0.15	-1.16	-0.38 ± 0.65	-0.77	0.24	-1.04	-0.01	-1.18
BcellWH2_02953	0.96	-0.09	-0.12	-0.47	-1.63	-0.27 ± 0.93	-0.37	-0.29	-0.47	-0.24	-0.1	-0.29 ± 0.14	0.31	0.11	0.07	0.01	0.04	0.11 ± 0.12	0.88	-0.09	0.37	0.03	-0.15	0.21 ± 0.42	-1.23	-1.04	-0.62	-0.98	-0.64	-0.9 ± 0.26	-0.59	-0.03	0.22	-1.3	-1.1	-0.82	-0.75 ± 0.67	-0.81	-0.95	-0.66	-0.87	-0.67	-0.26	-0.62 ± 0.25	-0.92	-1.09	-1.08	-0.81	-0.9
BcellWH2_02958	-	-	-	-	-	-	-	-	-	-	-	-	-	-	-	-	-	-	-	-	-	-	-	-	-1.24	-0.75	-1	-0.89	-0.33	-0.84 ± 0.34	-1.27	-0.49	-1.39	-1.23	-0.29	-0.5	-0.85 ± 0.54	-0.72	0.04	-0.85	0.7	-1.09	-0.95	-0.55 ± 0.84	-0.54	-0.58	-0.94	-0.68	-0.7
BcellWH2_02959	-	-	-	-	-	-	-	-	-	-	-	-	-	-	-	-	-	-	-	-	-	-	-	-	-0.67	-1.1	-1.35	-0.62	-0.14	-0.78 ± 0.47	-0.41	-1.07	-0.66	-1.12	-0.95	-0.49	-0.81 ± 0.28	-0.79	-0.81	-0.7	-1.12	-1.02	-0.72	-0.89 ± 0.21	-0.78	-0.94	-0.66	-1.06	-0.61
BcellWH2_02960	-	-	-	-	-	-	-	-	-	-	-	-	-	-	-	-	-	-	-	-	-	-	-	-	-0.77	-0.59	-0.73	-0.78	-0.76	-0.72 ± 0.07	-0.99	-1.22	0.19	-1.37	0.25	-0.78	-0.43 ± 0.79	-0.63	-1.28	-0.83	-1.15	-0.53	-0.66	-0.79 ± 0.27	-0.77	-0.48	-1.01	-0.67	-1.21
BcellWH2_02963	-	-	-	-	-	-	-	-	-	-	-	-	-	-	-	-	-	-	-	-	-	-	-	-	-0.84	-0.62	-0.08	-0.33	0.31	-0.31 ± 0.45	-1.46	-0.48	-0.53	-0.36	-1.5	-0.01	-0.6 ± 0.64	-0.18	0.3	-0.8	-0.28	0.09	0.36	-0.16 ± 0.5	0.39	0.08	-1.62	0.19	0.42
BcellWH2_02964	-0.81	-0.59	-0.62	-0.62	-1.04	-0.74 ± 0.19	-0.58	-0.88	-0.83	-0.48	-0.14	-0.58 ± 0.3	-0.61	-0.47	-0.88	-0.67	-0.88	-0.7 ± 0.18	-0.75	-0.98	-1.03	-1.14	-0.68	-0.91 ± 0.19	0.38	-0.57	0.06	-0.69	-0.44	-0.25 ± 0.45	-0.01	-1.3	-0.63	-0.47	0.43	0.11	-0.14 ± 0.49	0.04	-0.01	-0.2	-0.72	-0.17	0.25	-0.21 ± 0.4	-0.34	-0.91	-0.84	-0.2	-0.01
BcellWH2_02972	-0.88	-0.18	-0.9	-0.37	-0.89	-0.64 ± 0.34	-0.52	-0.52	-0.24	-0.37	-0.32	-0.39 ± 0.13	-1.07	-0.09	-0.91	-0.04	-0.84	-0.59 ± 0.49	-0.26	0.31	0.12	-0.92	0.14	-0.12 ± 0.5	-0.12	0.88	0.18	1.2	0.2	0.47 ± 0.55	-0.04	-0.81	-1.02	-0.08	-0.07	0.61	-0.14 ± 0.67	0.24	-1.27	0.47	-0.52	-0.03	-0.48	-0.14 ± 0.46	-1.4	-0.35	0.12	0.19	-0.36
BcellWH2_02973	0.48	-0.65	-1.14	-0.3	-0.48	-0.42 ± 0.59	-0.33	-1.81	-0.2	-0.5	-0.54	-0.68 ± 0.65	-0.8	0.41	-0.82	0.02	-0.97	-0.43 ± 0.61	-0.42	-1.25	0.65	0.64	0.74	0.07 ± 0.88	0.73	0.38	-0.86	-0.41	-1.13	-0.26 ± 0.79	-0.68	-0.36	0.11	-0.86	-0.08	-0.14	-0.25 ± 0.43	-0.51	-1.46	0.03	-0.25	-1.54	-1.2	-0.74 ± 0.75	-0.42	0.49	-0.32	0.09	0.74
BcellWH2_02974	-0.64	-0.95	-0.81	-0.51	-0.9	-0.76 ± 0.18	-0.74	-0.9	0.09	-0.56	-0.77	-0.57 ± 0.39	-1.05	-0.01	-1.09	-0.93	-0.98	-0.81 ± 0.45	-0.77	-1	-1.07	-0.51	-0.77	-0.83 ± 0.22	-1.02	-0.92	-0.7	-0.4	-1.25	-0.86 ± 0.32	-1	-1.25	0.09	-0.12	-0.95	-0.73	-0.43 ± 0.49	-0.85	-0.27	-0.79	-0.85	-0.65	-0.79	-0.77 ± 0.08	-0.93	0.13	-0.47	-0.1	-0.2
BcellWH2_02976	-0.65	0.14	-1.45	0.16	0.52	-0.26 ± 0.8	1.06	0.92	0.65	0.53	0.45	0.72 ± 0.26	0.57	0.21	0.82	0.75	0.91	0.65 ± 0.28	0.87	0.82	0.64	0.86	0.66	0.77 ± 0.11	-0.32	0.51	-1.53	-0.24	0.68	-0.18 ± 0.87	1.13	1.03	1.36	1.29	1.43	1.08	1.29 ± 0.15	1.69	1.66	1.47	1.25	1.07	1.44	1.31 ± 0.19	1	1.35	1.26	1.39	1.49
BcellWH2_03005	-0.63	-0.57	-1.11	-0.76	0.34	-0.54 ± 0.54	0.16	-0.31	-0.9	-1.41	-0.68	-0.63 ± 0.59	-0.47	-0.8	-0.2	-1.17	-0.51	-0.63 ± 0.37	-0.23	-0.62	-1.06	-0.99	-0.68	-0.72 ± 0.33	-0.15	1.44	-0.58	-0.21	-1.18	-0.13 ± 0.97	-1.2	0.66	-2.03	0.07	0.74	0.51	-0.18 ± 1.26	-0.03	-1.27	0.8	-1.44	-1.58	-1.08	-0.83 ± 1.1	-0.6	0.96	0.57	-1.67	0.64
BcellWH2_03006	1.42	0.73	0.92	1.27	1.34	1.14 ± 0.3	1.3	1.11	1.45	1.39	1.2	1.29 ± 0.14	0.81	1.07	1.18	1.22	1.14	1.09 ± 0.16	1.32	1.37	0.9	0.88	1.21	1.14 ± 0.23	1.22	1.38	0.99	0.64	1.37	1.12 ± 0.31	1.36	1.43	1.33	1.49	1.33	1.49	1.41 ± 0.09	0.66	1.3	1.56	1.28	1.51	1.28	1.41 ± 0.15	1.53	1.08	1.32	1.58	1.26
BcellWH2_03008	-0.76	-0.48	-0.4	-0.49	-0.67	-0.56 ± 0.15	-0.41	-0.48	-0.76	-1.33	-0.61	-0.72 ± 0.37	-0.5	-0.59	-0.89	-0.74	-0.93	-0.73 ± 0.19	-0.58	-1.05	-0.32	-0.36	-0.64	-0.59 ± 0.29	0.08	0.25	0.17	-0.31	0.09	0.06 ± 0.22	0.07	0.25	-0.28	0.13	0.03	0.12	0 ± 0.19	0.46	-0.04	0.49	-0.13	0.2	0.35	0.23 ± 0.27	0.31	0.85	0.5	0.36	-0.17
BcellWH2_03012	-0.9	0.28	0.09	-0.32	-0.99	-0.37 ± 0.57	-1.12	-1.12	-0.94	-1.14	-1.22	-1.11 ± 0.1	-1.04	-0.76	-1.35	-1.29	-0.83	-1.06 ± 0.26	-0.76	-1.25	-1.2	-0.63	-0.77	-0.92 ± 0.28	-	-	-	-	-	-	-	-	-	-	-	-	-	-	-	-	-	-	-	-	-	-	-	-	-
BcellWH2_03025	1.26	0.66	0.99	0.6	0.79	0.86 ± 0.27	-0.9	0.16	0.14	0.07	-0.59	-0.22 ± 0.49	0.52	0.16	0.2	0.1	-0.08	0.18 ± 0.22	1.11	-1.26	0.72	0.5	0.38	0.29 ± 0.91	0.57	0.52	0.49	-0.24	0.7	0.41 ± 0.37	0.17	0.61	-0.1	0.5	0.6	0.66	0.41 ± 0.35	0.95	1.09	1.09	0.71	0.36	0.98	0.79 ± 0.33	0.99	1.02	0.9	0.85	0.91
BcellWH2_03026	1.15	1.73	1.51	1.57	1.57	1.51 ± 0.21	1	0.96	0.72	0.81	0.57	0.81 ± 0.18	0.45	1.25	1.32	1.3	1.5	1.16 ± 0.41	-0.22	1.18	1.49	1.18	1.12	0.95 ± 0.67	1.14	1.18	1.42	1.15	1.45	1.27 ± 0.16	0.93	0.91	0.85	0.79	0.98	0.9	0.88 ± 0.08	1.35	1.52	0.91	1.14	1.04	0.93	1.01 ± 0.11	1.47	1.97	1.36	1.35	1.61
BcellWH2_03031	1.21	0.82	0.93	0.72	0.48	0.83 ± 0.27	0.55	0.57	0.54	0.32	0.58	0.51 ± 0.11	0.88	0.79	0.59	0.95	0.72	0.78 ± 0.14	1.25	0.8	0.61	0.54	0.73	0.79 ± 0.28	1.25	1.3	1.02	2.12	1.53	1.44 ± 0.42	1.27	1.17	1.3	1.01	1.16	1.32	1.2 ± 0.14	1.2	1.06	1.21	1.21	1.25	1.24	1.23 ± 0.02	1.21	1.32	1.07	1.42	1.34
BcellWH2_03041	-	-	-	-	-	-	-	-	-	-	-	-	-	-	-	-	-	-	-	-	-	-	-	-	-0.78	-0.9	-1.09	-1.36	-0.84	-1 ± 0.23	-0.85	-0.78	-1.13	-0.84	-0.56	-1.12	-0.91 ± 0.27	-0.93	-0.3	-0.67	-0.62	-0.85	-0.88	-0.75 ± 0.13	-0.89	-1.11	-0.47	-1.29	-1.01
BcellWH2_03047	-	-	-	-	-	-	-	-	-	-	-	-	-	-	-	-	-	-	-	-	-	-	-	-	-0.54	-0.85	-0.43	-0.92	-0.74	-0.69 ± 0.21	-1	0.14	-1.36	-0.26	-1.01	-0.82	-0.86 ± 0.46	-0.67	-0.85	0.31	0.07	-1.01	-0.23	-0.22 ± 0.57	-0.95	-0.83	-0.79	-0.8	-0.71
BcellWH2_03053	-0.05	-0.35	0.29	0.85	0.26	0.2 ± 0.45	-0.87	0.13	-0.89	-0.37	-0.18	-0.44 ± 0.44	0.5	-1.18	-0.85	-0.77	-1.13	-0.69 ± 0.69	-0.06	0.54	-0.48	0.14	0.43	0.11 ± 0.41	1.39	1.06	0.98	-0.49	0.98	0.78 ± 0.73	0.16	-0.82	0.42	-0.32	0.52	0.77	0.35 ± 0.47	1.05	0.39	0.83	0.58	0.67	0.68	0.69 ± 0.11	0.84	1.03	-1.47	0.57	0.53
BcellWH2_03054	0.06	-0.31	-0.27	-0.95	0.68	-0.16 ± 0.59	-1.83	-0.5	-1.37	-2.03	-0.56	-1.26 ± 0.71	0.27	-0.18	-0.67	0.17	-0.51	-0.18 ± 0.41	-0.38	-0.23	-1.11	0.41	1	-0.06 ± 0.8	1.04	0.64	0.91	0.67	0.13	0.68 ± 0.35	-0.63	-0.29	-0.21	-1.73	0.3	0.2	-0.36 ± 0.94	-0.46	0.1	-0.7	-0.14	0.28	-1.84	-0.6 ± 0.92	0.59	0.73	0.11	-0.15	0.56
BcellWH2_03056	-	-	-	-	-	-	-	-	-	-	-	-	-	-	-	-	-	-	-	-	-	-	-	-	0.96	-0.54	0.84	-0.41	-1.31	-0.09 ± 0.97	-1.32	-0.99	-1.86	-1.66	-1.13	-0.99	-1.41 ± 0.42	-0.57	-1.34	0.74	0.2	0.6	-0.84	0.18 ± 0.71	-1.03	0.95	-1.29	0.48	-0.02
BcellWH2_03083	-	-	-	-	-	-	-	-	-	-	-	-	-	-	-	-	-	-	-	-	-	-	-	-	-0.64	-0.15	-0.21	-0.37	-1.41	-0.56 ± 0.51	0.72	0.82	-1.13	0.35	0.59	0.35	0.04 ± 0.79	-0.22	-0.66	1.13	-1.54	-1.28	-1.15	-0.71 ± 1.23	-0.65	-0.33	0.6	-0.98	-1.05
BcellWH2_03084	-0.08	-0.91	-1.44	-1.45	-1.2	-1.02 ± 0.57	-0.86	0.45	-1.04	0.06	0.13	-0.25 ± 0.66	0.01	0.27	0.78	-0.17	0.94	0.37 ± 0.48	1.33	0.19	0.82	-0.12	0.49	0.54 ± 0.56	0.3	0.9	1.35	1.93	1.65	1.23 ± 0.64	1.03	0.76	1.48	1.47	1.04	1.23	1.31 ± 0.21	1.79	1.13	1.11	1.77	1.17	1.37	1.35 ± 0.3	0.86	0.9	1.09	1.24	1.62
BcellWH2_03085	-0.48	0.02	0.48	-0.77	-1.29	-0.41 ± 0.69	-1.09	-1.04	-0.98	-0.51	-1.56	-1.04 ± 0.37	0.32	-1.24	-1.22	-0.74	-1.43	-0.86 ± 0.71	-0.79	-1.05	-1.03	-0.37	-0.62	-0.77 ± 0.29	0.68	-0.83	-1.35	1.47	0.08	0.01 ± 1.13	-0.7	0.1	-0.03	-0.23	-1.29	-0.14	-0.42 ± 0.59	-0.31	0.24	-1.26	0.12	1.59	0.28	0.18 ± 1.16	-0.18	-0.95	-0.17	-0.07	0.06
BcellWH2_03099	-	-	-	-	-	-	-	-	-	-	-	-	-	-	-	-	-	-	-	-	-	-	-	-	-1.25	-0.69	-0.9	-0.87	-0.89	-0.92 ± 0.2	-0.71	-0.41	-1.12	-0.99	-0.73	-1.08	-0.98 ± 0.18	-0.61	-0.56	-0.93	-0.54	-0.96	-0.65	-0.77 ± 0.21	-0.36	-1.02	-1.11	-0.86	-0.71
BcellWH2_03116	-	-	-	-	-	-	-	-	-	-	-	-	-	-	-	-	-	-	-	-	-	-	-	-	-1.21	-1.13	-1.14	-0.74	-1.34	-1.11 ± 0.22	-0.68	0.12	-0.31	-1.1	-0.58	-0.32	-0.58 ± 0.37	-0.53	-0.88	-0.6	-0.93	-0.8	-1.27	-0.9 ± 0.28	-0.76	-1.19	-1.26	-0.74	-0.78
BcellWH2_03120	-0.93	-0.64	0.24	-1.06	0.37	-0.4 ± 0.67	-1.48	-0.41	-0.47	0.12	-0.7	-0.59 ± 0.58	-0.73	-0.56	-0.96	-1.04	-0.82	-0.82 ± 0.19	-0.79	-0.94	-0.38	-0.54	-0.5	-0.63 ± 0.23	-0.83	-0.86	-0.81	-0.57	-0.82	-0.78 ± 0.12	-1.09	0.19	-0.2	-0.22	-0.83	-0.71	-0.49 ± 0.33	-0.42	0.34	-0.53	-1.04	-0.08	-0.51	-0.54 ± 0.39	0.03	0.1	-0.91	-0.12	-0.88
BcellWH2_03127	-0.77	-0.16	-0.18	-1.12	-0.79	-0.6 ± 0.42	-1.07	-0.99	-0.81	-1.46	-0.41	-0.95 ± 0.38	-1.01	-1	-0.66	-0.53	-1.61	-0.96 ± 0.42	-0.39	-0.9	-1.25	-0.61	-0.93	-0.82 ± 0.33	0.52	0.52	0.31	-0.58	-1.19	-0.08 ± 0.77	-1.26	-0.78	-0.38	-1.31	-0.96	-0.86	-0.88 ± 0.38	-1.01	-1.12	-0.86	-0.07	-1.55	-0.55	-0.76 ± 0.62	-0.59	-0.91	-0.68	-0.71	-1.02
BcellWH2_03130	-1.16	-1.34	-1.14	-0.49	-0.1	-0.85 ± 0.53	-0.4	-1.47	-0.48	-0.48	-0.53	-0.67 ± 0.45	-0.65	-0.85	-0.65	-1.05	-0.69	-0.78 ± 0.18	-0.47	-0.99	-0.59	-0.27	-0.6	-0.58 ± 0.26	0.1	-0.65	-0.05	-0.35	-0.72	-0.33 ± 0.36	-0.09	-0.93	0.23	-1.73	-0.76	-0.57	-0.71 ± 0.8	-0.66	-0.77	-0.88	-0.08	-0.94	-1.12	-0.75 ± 0.46	-0.81	-0.98	-1.02	-0.43	-0.87
BcellWH2_03131	-0.65	-1.17	-1.16	-0.91	-0.66	-0.91 ± 0.26	-0.86	-1.14	-0.6	-0.99	-0.62	-0.84 ± 0.23	-0.81	-0.19	-0.75	-1.14	-1.11	-0.8 ± 0.39	-0.8	-0.92	-0.51	-1.16	-0.76	-0.83 ± 0.24	-1.51	-0.82	-1	-1.23	-0.71	-1.06 ± 0.32	-0.89	-0.3	-0.74	-0.2	-1.06	-0.86	-0.72 ± 0.37	-1.47	-0.79	-1.22	-0.85	-0.91	-0.9	-0.97 ± 0.17	-0.79	-0.53	-1.25	-0.35	-1.04
BcellWH2_03134	1.81	1.39	1.68	1.69	1.91	1.69 ± 0.2	1.68	1.85	1.73	1.72	1.6	1.72 ± 0.09	2	1.92	1.96	1.88	2.08	1.97 ± 0.08	2.26	2.05	1.74	1.81	1.89	1.95 ± 0.21	1.93	2.2	1.85	1.64	1.96	1.91 ± 0.2	1.92	2.22	1.38	1.61	1.92	2.13	1.76 ± 0.33	2.17	1.76	2.02	1.55	1.75	1.92	1.81 ± 0.21	2.06	1.79	2.15	2.07	1.93
BcellWH2_03137	2.66	-0.36	1.91	-0.29	1.83	1.15 ± 1.38	1.59	0.64	1.42	0.26	1.52	1.09 ± 0.6	1.65	-0.33	0.01	2.08	-1.14	0.45 ± 1.37	-0.3	2.72	2.43	2.52	2.55	1.99 ± 1.28	0.5	0.14	-0.04	-0.39	0	0.04 ± 0.32	0.5	0.02	0.22	0.21	0.52	0.47	0.35 ± 0.16	0.56	-1.18	-0.75	0.19	-0.14	0.53	-0.04 ± 0.55	-1.05	-1.28	-1.39	-0.71	-0.25
BcellWH2_03141	-1.05	-0.97	-1.22	-0.76	-0.68	-0.94 ± 0.22	0.12	-0.72	-0.91	-1.11	-1.07	-0.74 ± 0.5	-1.19	-0.71	-0.29	-0.73	-0.38	-0.66 ± 0.36	-1.07	-0.73	-1.03	-1.44	-1.29	-1.11 ± 0.27	-0.69	-1.15	-1.32	-1.46	-0.55	-1.03 ± 0.4	0.27	-0.7	-1.03	-0.16	-1.12	-0.59	-0.73 ± 0.44	-1.09	-1.12	-0.85	-0.86	0.19	-1.05	-0.64 ± 0.56	-0.67	-0.57	-0.7	-0.73	-1.27
BcellWH2_03145	-	-	-	-	-	-	-	-	-	-	-	-	-	-	-	-	-	-	-	-	-	-	-	-	-0.77	-0.67	-0.71	-0.63	-1.06	-0.77 ± 0.17	-0.82	-0.71	-1.56	-0.03	-0.98	-1.01	-0.89 ± 0.64	-0.58	-0.75	-0.69	-1.14	-0.78	-0.56	-0.79 ± 0.25	-0.39	-0.51	-1.11	0.88	-0.63
BcellWH2_03171	-0.91	-0.5	-0.24	-0.52	-0.66	-0.57 ± 0.25	-0.53	-1.5	-0.85	-1.2	-0.36	-0.89 ± 0.47	-0.46	-0.75	-0.47	0.02	-0.56	-0.44 ± 0.29	-0.68	-0.83	-1.15	-0.23	-1.15	-0.81 ± 0.38	-1	-1.24	-1.3	-1.32	-0.23	-1.02 ± 0.46	-0.99	0.29	-0.29	-0.69	-0.62	-0.71	-0.58 ± 0.19	-0.66	-0.81	-0.89	-0.93	-0.53	-0.66	-0.75 ± 0.19	-0.48	-0.5	0.36	-0.7	-0.95
BcellWH2_03172	-0.69	-0.22	-1.06	-1.18	-0.65	-0.76 ± 0.38	-0.37	-0.95	-1.11	-1.25	0.3	-0.67 ± 0.64	-0.62	-0.97	-0.7	-0.83	-0.86	-0.79 ± 0.14	-1.22	-0.93	-1.49	-1.28	-0.76	-1.14 ± 0.29	-0.89	-1.12	-0.94	-1	-0.64	-0.92 ± 0.18	-0.73	-1.01	-0.74	0.05	-0.8	-0.98	-0.62 ± 0.46	-1.48	-0.71	-0.83	-0.04	-1.08	-0.82	-0.69 ± 0.45	0.56	-1.28	-0.62	-0.83	-0.47
BcellWH2_03173	-0.55	-0.75	-0.56	-0.95	-1.06	-0.77 ± 0.23	-0.54	-0.43	-0.71	-0.66	-1.67	-0.8 ± 0.5	0.28	-0.56	-0.76	-1.26	-0.31	-0.52 ± 0.57	-0.85	-0.59	-0.48	-0.43	-0.82	-0.64 ± 0.19	-0.39	-0.56	0.5	-0.67	-0.08	-0.24 ± 0.47	-0.06	-0.45	0.33	-0.1	-1.24	-0.97	-0.5 ± 0.73	-0.56	-0.8	-0.77	-0.83	-0.1	-0.72	-0.61 ± 0.34	-1.1	0.61	-1.31	0.12	-0.38
BcellWH2_03175	-0.6	-1.06	-0.91	-0.87	-1.08	-0.91 ± 0.19	-0.44	-0.85	-0.39	0.11	-0.59	-0.43 ± 0.35	-0.95	-0.98	-0.87	-1.04	-0.04	-0.78 ± 0.42	-0.59	-0.6	-0.48	-1.02	-0.63	-0.66 ± 0.21	-0.39	-0.47	-0.25	-0.42	-0.15	-0.34 ± 0.13	-0.19	-0.28	-0.33	-0.52	-0.29	-0.02	-0.29 ± 0.21	-0.17	-1.1	-0.47	-0.29	-0.51	-0.33	-0.4 ± 0.1	-0.11	-0.76	-0.98	-1.19	0.26
BcellWH2_03176	0.24	0.51	0.37	-0.03	0.25	0.27 ± 0.2	0.85	-0.06	0.66	0.5	0.9	0.57 ± 0.38	-0.24	0.52	0.67	0.74	0.42	0.42 ± 0.39	-0.87	0.88	0.82	0.91	0.47	0.44 ± 0.75	0.76	0.59	1.41	0.83	0.59	0.84 ± 0.34	1.38	0.82	0.78	1	1.22	1.29	1.07 ± 0.23	1.31	0.2	1.32	0.48	0.75	0.73	0.82 ± 0.36	1.38	0.83	1.36	1.11	0.55
BcellWH2_03190	-0.89	0.17	0.29	-1.25	-0.82	-0.5 ± 0.69	-1.06	-1.1	-0.96	-1.03	-1.76	-1.18 ± 0.33	-1.16	-0.86	-0.99	-1.05	-0.69	-0.95 ± 0.18	-0.82	-0.73	-0.96	-0.59	-0.82	-0.78 ± 0.14	-	-	-	-	-	-	-	-	-	-	-	-	-	-	-	-	-	-	-	-	-	-	-	-	-
BcellWH2_03193	-0.18	0.32	0	0.13	0.04	0.06 ± 0.19	-0.35	-0.66	0.18	0.11	0.03	-0.14 ± 0.36	-1.03	-0.73	0.74	-1.34	-0.86	-0.64 ± 0.81	-0.54	0.54	0.56	-1.1	0.16	-0.08 ± 0.72	0.34	0.44	0.2	-0.28	1.26	0.39 ± 0.56	-1.56	0.4	0.48	0.55	0.01	0.01	0.26 ± 0.29	-0.04	-0.06	0.17	0.31	1.15	-0.19	0.36 ± 0.57	1.78	2.06	-1.72	0.27	0.45
BcellWH2_03195	1.86	1.62	1.75	1.73	1.66	1.72 ± 0.09	1.86	1.77	1.8	1.6	1.85	1.78 ± 0.1	1.85	1.64	1.66	1.98	1.87	1.8 ± 0.14	1.93	1.5	1.43	1.21	1.44	1.5 ± 0.27	1.45	1.86	1.22	1.68	1.72	1.59 ± 0.25	1.73	2.02	2.05	1.98	1.94	1.84	1.95 ± 0.09	1.93	1.73	2.13	2.05	1.75	1.85	1.94 ± 0.18	1.92	1.43	1.95	1.88	1.84
BcellWH2_03200	0.81	-0.48	0.46	0.24	-1.48	-0.09 ± 0.91	-1.77	-0.11	0.49	-1.93	-0.67	-0.8 ± 1.05	0.83	1.07	0.01	-1.11	0.74	0.31 ± 0.89	1.21	-0.97	-0.72	-0.53	-0.18	-0.24 ± 0.86	1.72	1.2	1.54	-0.09	1.27	1.13 ± 0.71	1.17	1.03	1.19	1.19	1.35	0.95	1.17 ± 0.17	1.39	0.98	1.27	1.14	1.46	1.38	1.31 ± 0.14	0.76	1.28	1.03	0.72	1.43
BcellWH2_03201	0.48	0.62	0.42	0.68	0.19	0.48 ± 0.19	0.57	0.56	0.81	0.45	0.55	0.59 ± 0.13	0.82	0.47	0.62	0.48	0.25	0.53 ± 0.21	1.71	0.21	0.47	0.38	0.8	0.72 ± 0.6	0.54	0.77	0.84	1.08	0.96	0.84 ± 0.2	1.09	0.8	1.23	1.47	1.41	1.37	1.37 ± 0.1	1.81	1.57	1.55	1.36	1.49	1.69	1.52 ± 0.14	0.87	1.35	0.4	1.18	1.71
BcellWH2_03204	1.29	1.6	1.4	1.61	1.76	1.53 ± 0.19	1.66	1.69	1.55	1.74	1.63	1.65 ± 0.07	1.67	1.47	1.48	1.78	1.65	1.61 ± 0.13	1.54	1.76	1.39	1.7	1.55	1.59 ± 0.15	1.58	1.76	1.55	1.88	1.55	1.67 ± 0.15	1.29	1.67	1.41	1.48	1.64	1.63	1.54 ± 0.11	1.66	1.49	1.66	1.54	1.63	1.36	1.55 ± 0.13	1.5	1.21	1.59	1.62	1.43
BcellWH2_03205	0.31	0.28	-1.3	-0.06	-0.03	-0.16 ± 0.66	-0.13	-0.47	0.07	-0.05	-1.92	-0.5 ± 0.82	0.17	-0.74	0.09	-0.67	-0.64	-0.36 ± 0.45	-0.48	-0.56	-0.87	-0.91	-0.64	-0.69 ± 0.19	-0.93	1.04	-0.14	-0.58	0.81	0.04 ± 0.86	-1.82	0.38	0.42	-0.63	-0.35	0.13	-0.11 ± 0.47	-0.48	-0.06	-0.79	0.62	0.1	0.05	0 ± 0.58	0.37	0.4	-0.15	0.08	0.75
BcellWH2_03209	-1.23	1.16	1.41	1.47	1.54	0.87 ± 1.18	1.01	1.52	1.28	1.35	1.28	1.29 ± 0.19	-0.14	1.55	1.1	0.94	1.41	0.97 ± 0.67	0.34	1.2	1.46	1.39	1.41	1.16 ± 0.47	1.05	1.32	1.05	1.27	1.01	1.14 ± 0.14	1.06	1.48	1.37	1.44	1.23	1.19	1.31 ± 0.12	1.24	1.52	1.35	1.21	1.25	1.23	1.26 ± 0.07	1.26	1.17	1.31	1.53	1.26
BcellWH2_03210	0.16	0.79	0.41	-0.19	0.09	0.25 ± 0.37	-0.93	-0.11	-1.42	-1.95	-1.24	-1.13 ± 0.68	-0.58	0.5	-0.82	0.33	0.2	-0.08 ± 0.59	0.94	-1.09	-0.73	-0.56	-1.08	-0.5 ± 0.84	-0.75	-1.04	0.37	-0.39	0.17	-0.33 ± 0.6	-1.62	0.04	0.27	-0.01	-0.42	-0.23	-0.1 ± 0.3	0.94	0.17	0.42	0.27	0.09	0.2	0.25 ± 0.14	-1.07	-1.22	0.43	0.14	-1.34
BcellWH2_03211	-1.6	-0.77	-0.54	-0.48	-1.04	-0.89 ± 0.45	0.1	-1.25	-0.78	-0.53	-0.47	-0.58 ± 0.49	-0.86	-0.92	-0.43	-0.61	-0.99	-0.76 ± 0.23	-0.93	-0.68	-0.75	-0.78	-0.53	-0.74 ± 0.15	-0.32	0	-0.85	-0.43	0.04	-0.31 ± 0.36	-0.38	-1	-0.22	-0.99	-0.03	0.06	-0.3 ± 0.48	-0.93	-0.94	-0.11	-1.64	-1.13	-1.09	-0.99 ± 0.64	-0.09	-0.46	-0.44	-0.4	-0.87
BcellWH2_03213	-0.65	-1.46	-1.29	0.23	-1.09	-0.85 ± 0.68	-1.58	-0.28	-0.67	-0.7	-0.04	-0.65 ± 0.59	-0.63	-1.06	-0.52	-1	-1.13	-0.87 ± 0.27	-0.56	-0.22	-0.9	-0.92	-0.96	-0.71 ± 0.32	-0.75	-1.09	0.68	-0.53	0.61	-0.22 ± 0.81	-1.41	-0.8	-0.93	-0.67	-1.36	-0.99	-0.99 ± 0.28	-0.68	0.17	-0.62	0.12	-0.54	-1.43	-0.62 ± 0.63	0.59	0.54	0.47	-1.93	-0.09
BcellWH2_03231	-0.9	-0.72	-0.08	0.24	-0.65	-0.42 ± 0.48	-0.52	0.05	-1.18	-1.73	-0.54	-0.79 ± 0.69	-1.21	0.44	-0.74	-1.06	-0.43	-0.6 ± 0.65	-0.98	-1.09	-1.01	-1.26	-0.53	-0.97 ± 0.27	-0.45	-0.72	-0.56	-0.42	-0.96	-0.62 ± 0.22	-1.07	-0.99	0.09	0.01	-0.68	0.18	-0.1 ± 0.39	-0.72	-0.96	-1.03	0.18	-1.05	-0.84	-0.68 ± 0.58	-1.22	-0.6	-0.45	-1.06	-1.31
BcellWH2_03232	-	-	-	-	-	-	-	-	-	-	-	-	-	-	-	-	-	-	-	-	-	-	-	-	-1.08	-1.09	-0.98	-1.19	-0.5	-0.97 ± 0.27	-0.64	-0.55	-1	-0.76	-0.75	-1.34	-0.96 ± 0.27	-0.81	-0.53	-0.77	-0.67	-0.87	-0.87	-0.8 ± 0.1	-0.87	-0.71	-0.82	0.21	-1.03
BcellWH2_03245	-	-	-	-	-	-	-	-	-	-	-	-	-	-	-	-	-	-	-	-	-	-	-	-	1.18	1.01	0.75	-0.57	0.92	0.66 ± 0.7	0.57	-1.28	0.57	0.48	0.01	0.58	0.41 ± 0.27	1.24	-0.82	0.65	0.73	0.55	0.71	0.66 ± 0.08	0.72	0.88	0.56	-1.38	1.02
BcellWH2_03246	1.74	-1.82	-0.9	-0.78	-0.58	-0.47 ± 1.32	0.18	-0.05	-0.05	0.13	0.07	0.06 ± 0.1	0.67	0.63	0.83	0.44	0.91	0.69 ± 0.18	1.04	0.49	0.93	0.76	0.5	0.74 ± 0.25	1.15	0.91	0.89	0.78	0.85	0.92 ± 0.14	1.13	0.23	0.91	0.46	0.49	0.58	0.61 ± 0.21	0.93	0.84	1.2	1.05	1.01	0.97	1.06 ± 0.1	1.22	1.02	0.51	0.34	1.11
BcellWH2_03273	-0.25	-1.37	0.4	0.1	-0.58	-0.34 ± 0.68	-0.74	0.18	-0.31	-1.81	-0.31	-0.6 ± 0.75	-1.36	0.23	0.13	0.05	0.85	-0.02 ± 0.81	-0.33	-1.52	1.08	-0.18	0.95	0 ± 1.06	-0.32	-0.33	-0.44	-0.31	0.31	-0.22 ± 0.3	-0.08	0.15	-0.18	-0.17	0.06	0.07	-0.06 ± 0.14	-0.4	-1.22	-0.69	-0.61	-0.24	0.18	-0.34 ± 0.4	0.23	-0.96	-0.24	0.23	0.07
BcellWH2_03274	0.91	0.14	-1.22	-0.15	-0.17	-0.1 ± 0.77	-0.02	-0.7	-0.27	-0.18	-0.47	-0.33 ± 0.26	-0.41	-0.08	0.01	0.3	0.51	0.07 ± 0.35	-0.32	0.43	-0.83	0.11	-0.97	-0.32 ± 0.6	-0.78	-0.49	-0.85	-1.33	-0.84	-0.86 ± 0.3	0.65	0.25	-0.2	-1.23	-0.79	0.87	-0.34 ± 0.91	-1.12	-1.15	-0.81	-1.27	0.05	-1.2	-0.81 ± 0.61	-0.91	-0.49	-0.14	-1.1	-1.17
BcellWH2_03278	-	-	-	-	-	-	-	-	-	-	-	-	-	-	-	-	-	-	-	-	-	-	-	-	-0.58	-0.6	-1.5	-0.84	0	-0.7 ± 0.54	-0.45	-0.38	-0.47	-0.69	-0.39	-0.91	-0.61 ± 0.23	-0.54	-0.94	-0.93	-0.59	-0.69	-0.86	-0.77 ± 0.16	-0.92	-1.12	-0.92	-0.75	-1.28
BcellWH2_03287	-	-	-	-	-	-	-	-	-	-	-	-	-	-	-	-	-	-	-	-	-	-	-	-	-0.65	-0.76	-0.95	-0.93	-0.97	-0.85 ± 0.14	-0.66	-0.77	-1.1	-1.37	-0.72	-0.82	-1 ± 0.29	-0.43	-0.54	-1.02	-0.53	-0.87	-0.55	-0.74 ± 0.24	-0.4	-0.76	-0.95	-0.95	-0.54
BcellWH2_03290	-	-	-	-	-	-	-	-	-	-	-	-	-	-	-	-	-	-	-	-	-	-	-	-	-0.63	-1.03	-1.02	-0.84	-0.63	-0.83 ± 0.2	-0.85	-0.78	-0.73	-1.14	-0.65	-1.01	-0.88 ± 0.23	-0.85	-0.58	-1.34	-0.4	-1.14	-1.04	-0.98 ± 0.4	-0.98	-0.98	-0.85	-1.17	-1.06
BcellWH2_03293	-	-	-	-	-	-	-	-	-	-	-	-	-	-	-	-	-	-	-	-	-	-	-	-	-1.44	-1.2	-1.32	-0.31	-0.51	-0.95 ± 0.51	-0.42	-0.52	-1.37	-1.11	-1.35	-0.68	-1.13 ± 0.32	-0.71	-0.94	-1.15	-0.95	-0.88	-0.91	-0.97 ± 0.12	0.02	-0.53	-0.73	-0.98	-0.67
BcellWH2_03294	-1.33	-0.9	-1.05	-0.79	-1.08	-1.03 ± 0.21	-0.33	-0.68	-0.8	-1.31	-1.37	-0.9 ± 0.44	-0.62	-1	-0.88	-0.81	-1.15	-0.89 ± 0.2	-0.51	-0.63	-0.97	-0.99	-0.56	-0.73 ± 0.23	-1.2	-1.18	-0.61	-0.7	-0.59	-0.86 ± 0.31	-0.2	-0.8	-1.22	-1.22	-0.41	-1.02	-0.97 ± 0.38	-0.75	-0.27	-1	-0.35	-1.18	-0.86	-0.85 ± 0.36	-1.08	-0.31	-0.84	-0.75	0.37
BcellWH2_03295	-1.76	-0.75	-0.89	-0.76	-0.96	-1.03 ± 0.42	-1.14	-1.08	-0.35	-1.04	-1	-0.92 ± 0.32	-0.9	-1.38	-0.94	-0.68	-1.04	-0.99 ± 0.26	-1.04	-1.02	-1.2	-0.88	-1.12	-1.05 ± 0.12	-	-	-	-	-	-	-	-	-	-	-	-	-	-	-	-	-	-	-	-	-	-	-	-	-
BcellWH2_03300	1.39	1.85	1.68	1.82	1.9	1.73 ± 0.21	1.71	1.63	1.57	1.64	1.65	1.64 ± 0.05	1.62	1.6	1.61	1.83	1.2	1.57 ± 0.23	1.46	1.66	1.61	1.53	1.8	1.61 ± 0.13	1.65	1.9	1.63	1.59	1.42	1.64 ± 0.17	1.56	1.78	1.5	1.44	1.7	1.72	1.59 ± 0.14	1.57	1.41	1.55	1.49	1.47	1.65	1.54 ± 0.08	1.79	1.47	1.87	1.61	1.38
BcellWH2_03301	-0.56	-0.89	-0.1	-0.47	0.1	-0.38 ± 0.39	0.11	-1.18	-0.45	-0.35	-1.43	-0.66 ± 0.63	-0.35	-1.4	-0.71	-0.86	-0.47	-0.76 ± 0.41	-0.98	-0.87	-0.81	-1.18	-0.63	-0.89 ± 0.21	-0.5	-0.02	0.24	0.96	0.53	0.24 ± 0.55	-0.09	-0.17	-0.45	0.15	-1.5	0.16	-0.41 ± 0.78	0.03	0.16	0.14	-0.29	0.23	0.52	0.15 ± 0.33	0.8	0.65	0.68	0.43	0.35
BcellWH2_03304	-0.55	1.39	1.15	1.24	1.21	0.89 ± 0.81	1.16	0.99	0.94	0.83	0.8	0.95 ± 0.14	0.79	0.86	0.98	1.02	1	0.93 ± 0.1	1.13	1.11	1.22	1.26	1.13	1.17 ± 0.07	1.48	1.27	1.26	0.87	1.06	1.19 ± 0.23	1.1	1.05	0.8	0.76	1.15	0.97	0.92 ± 0.18	1.47	-1.07	1.19	0.55	0.9	0.8	0.86 ± 0.27	1.25	1.45	1.43	0.9	0.78
BcellWH2_03319	-1.56	-0.97	-0.71	-1.15	-0.44	-0.97 ± 0.43	-0.78	-0.48	-0.55	-0.43	-0.98	-0.64 ± 0.23	-0.73	-1.13	-1.79	-1.04	-1.76	-1.29 ± 0.46	-1.33	-0.7	-1.28	-3.2	-1.05	-1.51 ± 0.98	-	-	-	-	-	-	-	-	-	-	-	-	-	-	-	-	-	-	-	-	-	-	-	-	-
BcellWH2_03331	-0.1	-1.41	-1.35	-1.33	-0.19	-0.88 ± 0.67	0.9	1.21	1.06	1.21	1	1.07 ± 0.13	1.18	1.4	1.36	0.97	1.15	1.21 ± 0.17	0.39	-0.27	-1.24	-1.31	-1.73	-0.83 ± 0.87	-1.03	-0.81	-0.88	0.48	-0.11	-0.47 ± 0.64	1.34	0.94	1.45	1.36	0.95	1.25	1.25 ± 0.22	1.47	1.76	2.27	1.5	1.46	1.39	1.65 ± 0.41	-1.06	-0.18	-0.84	-0.21	-0.12
BcellWH2_03332	-0.35	-1.39	-1.24	-0.51	-1.83	-1.06 ± 0.62	0.85	0.78	0.99	1.05	0.91	0.92 ± 0.11	1.04	1.34	1.3	1.07	1.28	1.21 ± 0.14	1.24	0.36	-0.78	-0.11	-0.7	0 ± 0.83	-0.99	-1.13	-0.91	-0.93	-0.51	-0.9 ± 0.23	1.24	0.96	1.34	1.05	0.73	0.88	1 ± 0.26	1.7	1.59	1.52	1.21	1.45	1.26	1.36 ± 0.15	0.26	-0.5	-1.24	-0.81	-1.09
BcellWH2_03333	-0.29	-0.45	-1.28	-0.37	-1.06	-0.69 ± 0.45	0.62	0.51	0.88	0.78	0.68	0.69 ± 0.14	0.34	1.14	0.99	1.07	1.4	0.99 ± 0.39	0.9	-1.15	-1.11	-0.05	-1.19	-0.52 ± 0.93	-0.96	-0.94	-1.28	0.51	-1.22	-0.78 ± 0.73	1.02	0.52	0.75	0.36	0.54	0.78	0.61 ± 0.2	1.53	1.27	1.4	1.02	1.03	1.1	1.14 ± 0.18	0.08	-0.2	0.15	-1.23	-0.97
BcellWH2_03334	-1.13	-0.97	-1.47	-1.21	-1.12	-1.18 ± 0.18	-0.93	-0.69	-0.76	-0.3	-0.78	-0.69 ± 0.24	0.12	-0.52	-0.9	-0.47	-0.58	-0.47 ± 0.37	-0.69	-1.07	-0.93	-1.07	-1.08	-0.97 ± 0.17	-0.74	-0.29	-1.01	-0.39	-1.19	-0.72 ± 0.39	0.24	0.04	-0.06	-0.14	0.09	0.36	0.06 ± 0.22	0.14	0.3	0.35	-0.11	0.08	-1.2	-0.22 ± 0.68	-0.8	-0.36	-1.34	-1.37	-1.18
BcellWH2_03344	-0.68	-1.27	-1.11	-0.74	-1.28	-1.01 ± 0.29	-1.79	-0.13	-1.14	-0.25	0.02	-0.66 ± 0.78	0.61	0.62	0.53	0.02	0.41	0.44 ± 0.25	0.52	-0.32	-1.08	-0.94	-1.01	-0.57 ± 0.68	-0.91	-0.81	-0.9	-0.03	-1.26	-0.78 ± 0.46	0.16	0.15	0.29	0.04	-0.46	0.57	0.11 ± 0.44	0.18	0.94	0.58	0.27	0.78	-0.17	0.36 ± 0.42	-1.03	-1.09	-1.07	-1.16	-0.51
BcellWH2_03345	-	-	-	-	-	-	-	-	-	-	-	-	-	-	-	-	-	-	-	-	-	-	-	-	-0.48	-0.86	-0.69	-0.7	-0.88	-0.72 ± 0.16	-0.8	-0.36	0.16	-1.23	-1.16	-0.82	-0.76 ± 0.64	-0.43	-1.22	-0.6	0.73	-0.76	-1.09	-0.43 ± 0.8	-1.46	-0.8	-0.88	-1.15	-0.95
BcellWH2_03346	0.99	0.21	-0.57	0.2	0.19	0.2 ± 0.55	1.62	1.47	1.49	1.44	1.52	1.51 ± 0.07	1.35	1.68	1.87	1.65	1.81	1.67 ± 0.2	-0.76	-1.21	-0.74	0.57	-0.89	-0.6 ± 0.68	0.79	0.55	0.37	-0.01	0.86	0.51 ± 0.35	1.71	1.7	1.82	1.59	1.57	1.64	1.66 ± 0.12	2.08	1.99	1.96	1.71	2.01	1.77	1.86 ± 0.14	0.85	0.96	0.92	-1.39	-0.97
BcellWH2_03347	-	-	-	-	-	-	-	-	-	-	-	-	-	-	-	-	-	-	-	-	-	-	-	-	-0.72	-1.12	-0.98	-1.15	-0.71	-0.94 ± 0.21	-0.55	-1.08	-0.56	0.23	-0.83	-0.85	-0.5 ± 0.51	-0.47	-0.77	0.52	-1.04	-1.21	-1.08	-0.7 ± 0.82	-0.86	-0.56	-0.82	-0.37	-0.99
BcellWH2_03348	-0.96	-1.8	-1.08	-1.02	-1.32	-1.24 ± 0.34	0.23	0.1	0.03	0.13	0.1	0.12 ± 0.07	-0.79	0.42	0.83	0.78	0.72	0.39 ± 0.68	-0.28	-0.98	-1.08	-0.95	-1	-0.86 ± 0.33	-0.13	-0.24	-1.02	-0.36	-0.86	-0.52 ± 0.39	-1.06	0.38	-0.71	-0.46	-0.89	0.84	-0.31 ± 0.78	0.7	0.36	1.17	-0.19	0.7	-0.88	0.2 ± 0.92	-0.93	-0.93	-1.08	-1.47	-0.92
BcellWH2_03370	-1.15	-0.99	-0.64	-0.85	-0.9	-0.91 ± 0.19	-1.25	-0.07	-0.55	-1.39	-0.46	-0.74 ± 0.56	-0.43	-1.1	-0.36	-1.13	-1.17	-0.84 ± 0.41	-0.96	-0.87	-0.79	-1.22	-0.36	-0.84 ± 0.31	-1.06	-0.92	-1.17	-1.45	-0.51	-1.02 ± 0.34	-1.08	-0.49	-1.18	-0.96	-0.37	-0.11	-0.66 ± 0.5	-0.49	-0.81	-0.21	-1.01	-0.85	-1.06	-0.78 ± 0.39	-0.88	-1.17	0.09	-0.67	-0.61
BcellWH2_03374	-	-	-	-	-	-	-	-	-	-	-	-	-	-	-	-	-	-	-	-	-	-	-	-	-0.34	-0.2	-0.68	-0.34	-0.87	-0.49 ± 0.28	0.47	-1.1	0.12	0.23	-1.4	-1.16	-0.55 ± 0.85	-0.87	-1.28	-0.73	0.17	0.93	-0.73	-0.09 ± 0.8	-0.58	-0.38	-0.81	-1.5	-1.13
BcellWH2_03384	-0.81	1.32	0.8	1.35	1.13	0.76 ± 0.9	1.05	0.96	1.03	0.99	0.97	1 ± 0.04	0.58	1.24	1	0.89	0.64	0.87 ± 0.27	0.56	1.16	0.66	0.84	0.89	0.82 ± 0.23	1.74	1.18	1.34	1.77	1.53	1.51 ± 0.26	1.3	0.79	1.05	1.3	1.29	1.34	1.24 ± 0.13	0.82	1.67	1.32	1.21	0.54	1.27	1.09 ± 0.36	0.9	1.17	0.86	0.74	1.05
BcellWH2_03391	-	-	-	-	-	-	-	-	-	-	-	-	-	-	-	-	-	-	-	-	-	-	-	-	-0.5	-0.83	0.08	-0.68	-0.9	-0.56 ± 0.39	-0.81	-0.85	-0.67	-0.24	-0.91	-0.11	-0.48 ± 0.37	-0.79	0.63	-0.61	-0.21	-0.8	-0.83	-0.61 ± 0.28	-0.64	-0.79	-1.41	-0.78	-0.51
BcellWH2_03392	-0.78	0.16	0.51	0.13	-0.17	-0.03 ± 0.49	-0.59	-0.15	-1.79	-0.52	-0.18	-0.65 ± 0.67	0.36	-1.6	-1.45	-0.29	0.29	-0.54 ± 0.94	-0.37	0.49	-0.53	0.55	0.31	0.09 ± 0.5	-0.62	-0.51	0.18	-0.47	-1.19	-0.52 ± 0.49	0.2	-1.34	0.3	-1.32	0.34	-0.95	-0.41 ± 0.86	-0.45	0.25	-1.4	0.39	0.4	-1.32	-0.48 ± 1.01	-0.63	-0.69	-0.88	-1.3	-1.31
BcellWH2_03395	-0.44	0.07	-1.02	-0.87	-0.5	-0.55 ± 0.43	-0.55	-0.4	-0.59	-0.66	-0.21	-0.48 ± 0.18	-1.05	-0.69	-0.76	-0.14	0.42	-0.44 ± 0.58	-0.26	-0.82	-0.5	0.52	-0.74	-0.36 ± 0.54	-0.15	0.38	-0.03	0.68	0.51	0.28 ± 0.36	0.3	0.46	0.53	0.44	-0.22	0.07	0.21 ± 0.35	-0.94	-0.04	-0.02	0.01	0.13	0.49	0.16 ± 0.24	0.66	0.77	0.43	0.07	-0.03
BcellWH2_03398	-	-	-	-	-	-	-	-	-	-	-	-	-	-	-	-	-	-	-	-	-	-	-	-	1.1	1.44	1.22	0.85	1.74	1.27 ± 0.34	1.3	1.15	1.4	1.52	1.43	1.41	1.44 ± 0.05	1.84	1.35	1.34	1.36	1.29	1.31	1.32 ± 0.03	1.67	1.28	1.43	1.47	0.91
BcellWH2_03402	0.89	-1.16	0.11	1.33	1.51	0.54 ± 1.09	1.4	1.93	1.78	1.74	1.72	1.71 ± 0.19	2.31	2.34	2.35	1.97	2.29	2.25 ± 0.16	2.57	1.93	2.21	1.72	1.94	2.07 ± 0.33	1.61	1.98	1.78	1.77	2.13	1.86 ± 0.2	1.84	2.47	1.29	1.79	2.05	2.15	1.82 ± 0.38	1.75	1.59	2.26	1.64	1.81	2.01	1.93 ± 0.27	2.39	1.67	2.27	1.81	1.75
BcellWH2_03407	1.31	1.46	1.36	1.33	1.47	1.39 ± 0.08	1.2	0.91	1.48	1.37	1.18	1.23 ± 0.22	0.81	1.42	1.45	1.19	1.22	1.22 ± 0.26	-0.3	-0.94	1.9	1.44	-0.79	0.26 ± 1.32	1.07	1.71	2	1.76	1.66	1.64 ± 0.34	1.48	1.59	1.38	1.63	1.36	1.57	1.49 ± 0.14	1.58	1.63	1.63	1.66	1.64	1.66	1.65 ± 0.01	1.68	1.59	1.88	1.31	2.46
BcellWH2_03408	-0.83	-1.21	0.2	0.06	0.53	-0.25 ± 0.73	-0.21	0.43	0.5	0.14	-0.03	0.17 ± 0.3	0.44	0.66	0.71	0.37	0.77	0.59 ± 0.17	1.18	0.47	0.61	-0.01	0.47	0.54 ± 0.43	0.6	1.23	1.21	1.04	0.52	0.92 ± 0.34	1.05	1.59	0.44	1.03	1.16	1.29	0.98 ± 0.37	1.07	1.03	1.15	0.93	0.96	1.16	1.05 ± 0.12	1.36	1.16	1.42	1.24	0.97
BcellWH2_03410	0.68	-0.1	0.7	0.77	0.39	0.49 ± 0.36	0.67	0.48	0.71	0.81	0.71	0.68 ± 0.12	0.85	0.59	0.26	0.47	-1.29	0.18 ± 0.84	-0.45	0.8	0.94	0.7	0.84	0.57 ± 0.57	0.46	0.31	0.45	1.21	-1.23	0.24 ± 0.89	0.6	0.55	0.22	0.34	-1.74	0.76	-0.1 ± 1.11	0.83	0.83	-0.9	-1.74	0.65	-1.46	-0.86 ± 1.06	0.89	0.21	0.43	0.59	1.04
BcellWH2_03411	-0.65	-0.17	0.54	0.62	0.36	0.14 ± 0.54	0.97	0.9	0.83	0.83	1.01	0.91 ± 0.08	1.12	0.62	0.59	0.46	0.55	0.67 ± 0.26	0.77	0.14	0.84	0.36	0.56	0.54 ± 0.29	1.21	1.45	1.4	1.12	1.51	1.34 ± 0.16	1.4	1.44	1.38	1.38	1.06	1.28	1.27 ± 0.15	0.85	1.46	1.21	1.5	1.54	1.36	1.4 ± 0.15	1.48	1.27	1.23	1.64	1.24
BcellWH2_03414	-	-	-	-	-	-	-	-	-	-	-	-	-	-	-	-	-	-	-	-	-	-	-	-	-0.52	-0.89	-0.62	-0.95	0.5	-0.5 ± 0.58	0.16	-1.13	-0.28	-0.38	-0.73	-1.51	-0.73 ± 0.56	-0.73	-1.15	-0.68	0.18	-1.1	0.46	-0.29 ± 0.73	-0.91	-1	-0.99	-1.21	-0.26
BcellWH2_03415	-0.82	-1.72	-1.29	-0.66	1.03	-0.69 ± 1.05	0.26	0.73	0.87	0.91	0.82	0.72 ± 0.26	1.22	1.23	1.12	0.75	1.3	1.12 ± 0.22	1.32	0.75	1.24	1.13	1.36	1.16 ± 0.24	1.37	1.66	1.83	1.92	2.02	1.76 ± 0.26	1.82	1.91	1.78	1.82	1.84	1.81	1.81 ± 0.03	1.92	1.87	1.96	1.92	1.98	2.04	1.97 ± 0.05	2.06	2.25	2.03	2.27	2.04
BcellWH2_03418	-0.94	-0.02	-0.74	-0.65	0.3	-0.41 ± 0.52	0.13	-0.75	0.06	-0.06	-0.25	-0.18 ± 0.35	0.13	-0.37	-0.75	-1.4	-0.53	-0.59 ± 0.56	-0.48	-0.38	-0.81	0.12	-0.02	-0.31 ± 0.37	-0.93	1.02	-0.54	-0.16	0.32	-0.06 ± 0.76	-0.12	0.37	-0.04	0.25	0.42	-0.77	-0.04 ± 0.52	0.14	-0.54	-1.36	-0.41	-0.56	0.14	-0.55 ± 0.62	-0.89	-1.17	0.57	-0.14	-1.46
BcellWH2_03419	-1.27	-0.95	-0.5	-0.86	-1.05	-0.93 ± 0.28	-1.09	-1.03	-0.29	-1.33	-1.62	-1.07 ± 0.49	-0.67	0.36	-0.9	-0.82	-1.22	-0.65 ± 0.6	-0.89	-1.25	-1.44	-0.98	-1.14	-1.14 ± 0.22	-1.22	-1.34	-1.09	-0.73	-0.5	-0.98 ± 0.35	-0.9	-0.57	-1.08	-1	-0.87	-0.81	-0.94 ± 0.12	-0.91	-0.96	-1	-0.81	-0.8	-1.03	-0.91 ± 0.12	-0.9	-0.74	-0.69	-1.01	-0.83
BcellWH2_03423	-	-	-	-	-	-	-	-	-	-	-	-	-	-	-	-	-	-	-	-	-	-	-	-	-0.66	-0.9	-0.67	-0.78	-0.67	-0.73 ± 0.1	-0.1	-0.69	-0.45	-0.24	-0.7	-1.1	-0.62 ± 0.37	-0.95	-0.75	-0.6	-0.81	-0.77	-0.92	-0.77 ± 0.13	-0.97	-1.31	-0.72	-1.1	-0.64
BcellWH2_03425	-	-	-	-	-	-	-	-	-	-	-	-	-	-	-	-	-	-	-	-	-	-	-	-	-1.07	-0.6	-1.24	-0.08	-0.46	-0.69 ± 0.47	-0.69	-0.82	-0.88	-1.28	-0.58	-0.84	-0.9 ± 0.29	-0.91	-0.01	-0.92	-0.99	-1.28	-1.04	-1.06 ± 0.16	-0.73	-0.55	-0.75	-1.03	0.44
BcellWH2_03427	-	-	-	-	-	-	-	-	-	-	-	-	-	-	-	-	-	-	-	-	-	-	-	-	-0.7	-1.22	-0.82	-0.59	-0.76	-0.82 ± 0.24	-0.73	0.91	-1.96	-1.24	-1.07	-0.51	-1.2 ± 0.6	-0.41	-0.63	-0.33	-1.06	-0.97	-0.82	-0.79 ± 0.32	0.38	-1.06	0.34	-0.96	-1.01
BcellWH2_03429	0.28	-0.97	1.01	0.62	0.51	0.29 ± 0.75	-0.33	0.65	-1.63	0.44	-0.22	-0.22 ± 0.9	0.11	0.82	0.84	-0.68	-1.07	0 ± 0.86	0.04	0.22	-0.95	-0.76	-1.36	-0.56 ± 0.67	-0.91	0.91	0.1	0.42	0.5	0.2 ± 0.69	0.29	0.9	0.31	0.53	0.68	0.64	0.54 ± 0.17	-0.43	-1.64	0.9	0.15	-0.07	0.38	0.34 ± 0.42	0.73	0	0.55	0.69	0.1
BcellWH2_03435	1.24	0	1.01	1.06	0.63	0.79 ± 0.49	0.25	0.03	0.42	0.55	0.2	0.29 ± 0.2	1.03	0.45	0.09	0.38	0.62	0.51 ± 0.34	-0.88	0.76	0.72	0.72	0.81	0.42 ± 0.73	-	-	-	-	-	-	-	-	-	-	-	-	-	-	-	-	-	-	-	-	-	-	-	-	-
BcellWH2_03436	-0.21	0.62	0.84	-0.06	0.26	0.29 ± 0.44	0.03	-1.01	-0.03	-0.63	-0.17	-0.36 ± 0.44	-1.31	0.82	-0.12	-0.09	-1.02	-0.34 ± 0.84	-0.71	-0.02	-0.21	-0.88	-1.3	-0.62 ± 0.52	0.36	0.75	-0.7	-1.02	0.88	0.05 ± 0.86	0.54	0.65	0.82	0.64	0.45	0.7	0.65 ± 0.16	-0.56	-1.31	-0.07	0.72	0.75	0.81	0.55 ± 0.42	1.41	-1.41	1.23	0.66	-0.1
BcellWH2_03438	-1.1	-0.55	-1.03	-0.89	-0.82	-0.88 ± 0.21	-1.16	-0.87	-0.37	-0.72	-1.65	-0.95 ± 0.48	-0.43	-0.76	-1.12	-0.65	-0.36	-0.67 ± 0.3	-1.11	-1.35	-0.93	-1.34	-0.69	-1.09 ± 0.28	-	-	-	-	-	-	-	-	-	-	-	-	-	-	-	-	-	-	-	-	-	-	-	-	-
BcellWH2_03443	0.81	0.69	1.07	1.02	0.55	0.83 ± 0.22	0.65	0.81	0.84	0.74	0.66	0.74 ± 0.09	0.86	0.68	0.97	0.76	0.8	0.81 ± 0.11	0.42	1	1.19	0.68	0.97	0.85 ± 0.3	1.36	1.19	1.26	1.13	0.79	1.15 ± 0.22	0.99	1.31	0.87	0.91	0.95	1.25	0.99 ± 0.18	1.35	1.01	1.22	0.87	1	1.09	1.04 ± 0.15	1.17	1.21	1.16	0.88	1.19
BcellWH2_03444	-0.81	-1.47	-0.81	-0.77	-0.84	-0.94 ± 0.3	-0.91	0.23	-0.01	-0.39	-0.13	-0.24 ± 0.44	0.82	0.41	-0.58	-0.03	-0.15	0.09 ± 0.54	0.29	-0.77	-0.42	-0.59	-1.34	-0.57 ± 0.59	-1.29	-1.2	0.67	1.43	1.47	0.21 ± 1.37	1.2	-0.01	1.32	1.44	1.6	1.1	1.36 ± 0.21	1.31	1.52	1.44	1.76	1.53	1.79	1.63 ± 0.17	0.99	1.38	1.32	1.15	1.41
BcellWH2_03445	-0.14	-1.34	0.77	1.27	1.16	0.34 ± 1.09	1.06	0.46	0.86	-0.53	0.82	0.53 ± 0.63	-1.53	-0.97	-1.28	1.23	-0.64	-0.64 ± 1.1	-0.02	-1.25	-1.02	-1.15	-0.98	-0.89 ± 0.5	1.47	1.08	0.91	-0.45	1.22	0.84 ± 0.75	0.94	1.17	1.2	1.12	-1.11	1.13	0.58 ± 1.13	1.64	1.36	0.9	1.17	1.1	1.08	1.06 ± 0.11	1.28	1.32	1.21	1.17	1.32
BcellWH2_03450	-0.02	-0.89	-1.25	0.09	-0.08	-0.43 ± 0.6	-1.82	-1.24	-0.59	-1.67	-1.55	-1.38 ± 0.49	-0.57	0.02	-0.76	0.07	0.48	-0.15 ± 0.51	-0.45	-0.46	-0.83	0.2	-0.83	-0.47 ± 0.42	0.72	-0.44	-1	1.36	0.67	0.26 ± 0.96	-1.39	-0.71	-1.62	-0.93	-0.29	-0.12	-0.74 ± 0.68	-0.29	0.46	0.66	0.12	-0.66	0.51	0.16 ± 0.59	-0.9	-0.77	0.14	-0.52	-0.9
BcellWH2_03451	-	-	-	-	-	-	-	-	-	-	-	-	-	-	-	-	-	-	-	-	-	-	-	-	-0.32	1.02	-0.55	1.35	-1.07	0.09 ± 1.05	-1.22	-1.46	-1.66	-0.75	-1.12	-0.94	-1.12 ± 0.39	-0.88	0.29	-0.58	-0.48	-0.09	-1	-0.54 ± 0.37	0.33	0.29	0.06	0.11	-0.15
BcellWH2_03453	-1.09	-0.85	-0.9	-0.33	-1.44	-0.92 ± 0.4	-0.12	-1.08	-0.82	-0.37	0.02	-0.47 ± 0.46	-0.61	-0.72	-0.61	-0.84	-0.95	-0.75 ± 0.15	-1.18	-0.99	-0.7	-0.89	-0.88	-0.93 ± 0.17	-0.76	-1.02	-0.99	-0.77	-0.88	-0.88 ± 0.12	-0.71	-0.82	-1.26	-1.19	-0.34	-0.7	-0.87 ± 0.43	-1.09	-0.47	-0.81	-0.37	-0.68	-1.05	-0.73 ± 0.28	-0.85	-0.92	-0.54	-0.99	-0.91
BcellWH2_03454	-0.81	-1.46	0.25	-0.87	-0.9	-0.76 ± 0.62	-0.86	0	-0.07	-1.5	-1.08	-0.7 ± 0.65	0.02	-0.03	-0.79	-0.9	-1.37	-0.61 ± 0.6	-0.86	-1.1	-0.27	-0.79	-0.38	-0.68 ± 0.35	0.18	-0.56	0.76	-0.15	0.48	0.14 ± 0.52	-0.9	0.04	-0.87	-0.64	-1.22	-0.91	-0.91 ± 0.24	-0.15	0	-0.96	-0.36	-0.33	-1.16	-0.7 ± 0.42	0.72	-0.81	0.24	0.01	0.29
BcellWH2_03455	0	-0.29	0.23	-1.3	-0.81	-0.43 ± 0.62	-0.44	0.29	-0.13	-0.39	-0.5	-0.24 ± 0.33	-0.13	-0.82	0.15	-0.04	0.36	-0.1 ± 0.45	0.66	-0.95	-0.53	0.07	-0.7	-0.29 ± 0.65	0.01	-1.11	0.49	0.61	0.36	0.07 ± 0.7	0.35	0.23	0.2	0.22	-1.58	-0.12	-0.32 ± 0.85	-0.47	-0.07	-0.94	-0.1	0.08	0.31	-0.16 ± 0.55	0.34	0.36	0.46	0.32	-0.17
BcellWH2_03456	0.6	2.22	0.2	0.62	0.07	0.74 ± 0.86	0.53	0.99	0.43	0.41	0.49	0.57 ± 0.24	0.41	0.73	1.06	0.38	0.63	0.64 ± 0.28	1.46	0.34	0.09	0.32	0.55	0.55 ± 0.54	2.86	0.54	2.38	0.91	0.03	1.35 ± 1.22	0.45	-0.37	1.62	1.43	-2	-1.7	-0.16 ± 1.96	0.6	0.59	2.33	1.5	0.35	0.05	1.06 ± 1.05	0.02	0.28	0.31	0.51	-0.57
BcellWH2_03458	-0.11	-1.58	0.16	0.01	-0.09	-0.32 ± 0.71	-0.52	-0.14	-0.15	-0.33	-1.29	-0.49 ± 0.47	-0.53	-0.13	-0.28	-0.08	0.02	-0.2 ± 0.21	-0.56	-0.7	0.76	-0.83	0.31	-0.2 ± 0.7	-0.68	-0.69	-0.86	-0.44	0.11	-0.51 ± 0.38	0.17	-0.85	-1.05	-0.91	-0.08	-0.07	-0.53 ± 0.53	-0.22	-0.42	-0.01	-0.66	0.35	-0.49	-0.2 ± 0.46	0.55	0.19	-0.72	-0.19	0.28
BcellWH2_03463	-1.11	-0.94	-0.99	-0.74	-0.99	-0.95 ± 0.13	-0.29	-0.62	-0.68	-0.16	-0.82	-0.51 ± 0.28	-0.77	-0.94	-0.71	-0.75	-0.79	-0.79 ± 0.09	-0.83	-0.39	-0.75	-0.74	-1.11	-0.76 ± 0.26	-0.68	0.81	-0.86	-0.72	-0.93	-0.48 ± 0.72	0.37	0.1	-1.12	0.05	0.1	-0.41	-0.34 ± 0.57	-0.32	-1.13	-0.69	0.49	0.37	-1.22	-0.26 ± 0.83	-1.39	-1.05	-1.12	-0.34	-1.23
BcellWH2_03467	-	-	-	-	-	-	-	-	-	-	-	-	-	-	-	-	-	-	-	-	-	-	-	-	-0.55	0.53	0.31	0.96	-0.09	0.23 ± 0.58	0.25	-1.09	-1.72	-0.02	-1.08	-1.04	-0.97 ± 0.7	-0.32	-0.94	0.45	-0.3	-0.37	0.73	0.13 ± 0.55	-1.05	-0.91	-1.34	-1.49	0.08
BcellWH2_03472	-	-	-	-	-	-	-	-	-	-	-	-	-	-	-	-	-	-	-	-	-	-	-	-	-0.89	-1.05	-1.06	-0.95	-0.75	-0.94 ± 0.13	-0.48	-0.86	-1.02	-1.22	-0.74	-0.94	-0.98 ± 0.2	-0.84	-0.59	-1.39	-0.43	-0.67	-1.03	-0.88 ± 0.42	-0.85	-1.31	-1.04	-0.73	0.13
BcellWH2_03507	-0.58	-0.8	-1.13	-1.63	0.45	-0.74 ± 0.77	-0.02	0.07	-1.58	0.21	0.08	-0.25 ± 0.75	1.01	-0.84	0.29	-0.41	1.12	0.23 ± 0.86	0.48	-0.97	1.17	0.8	-0.18	0.26 ± 0.85	-0.77	0.1	0.64	-0.5	-0.58	-0.22 ± 0.58	-1.09	0.64	0.03	-0.28	0.24	-1.12	-0.28 ± 0.6	-0.35	-0.33	-0.7	-0.56	-0.8	-0.54	-0.65 ± 0.12	-0.49	-0.62	-0.94	-0.59	0.17
BcellWH2_03546	-	-	-	-	-	-	-	-	-	-	-	-	-	-	-	-	-	-	-	-	-	-	-	-	-1.02	-1.46	-1.48	-1.07	-0.94	-1.2 ± 0.26	-1	-0.56	-0.29	-0.71	-0.62	-0.97	-0.65 ± 0.28	-1.3	-0.5	-1.31	-0.91	-0.39	-1.13	-0.94 ± 0.4	-0.96	-1.05	-0.88	0.04	-0.82
BcellWH2_03547	-0.83	-1.15	-1.01	-0.55	-0.84	-0.88 ± 0.23	-0.05	-0.1	-0.97	-0.25	-0.06	-0.29 ± 0.39	-0.36	-0.64	-0.29	-0.86	-1.06	-0.64 ± 0.33	-0.72	-0.73	-1.16	-0.71	-0.36	-0.74 ± 0.28	-	-	-	-	-	-	-	-	-	-	-	-	-	-	-	-	-	-	-	-	-	-	-	-	-
BcellWH2_03552	-	-	-	-	-	-	-	-	-	-	-	-	-	-	-	-	-	-	-	-	-	-	-	-	1.03	-0.59	-0.72	-1.08	-1.01	-0.47 ± 0.87	-1.27	-0.78	-1.4	-0.71	-0.76	-0.95	-0.96 ± 0.31	-1.08	-0.69	1.4	-0.96	-1.03	-0.27	-0.21 ± 1.13	-0.34	-0.71	-0.51	-1.08	-1.03
BcellWH2_03554	2.46	0.87	0.79	2.06	0.99	1.44 ± 0.77	1.92	1.65	1.86	2.12	2.06	1.92 ± 0.18	1.63	2.02	2.51	2.51	2.47	2.23 ± 0.39	-0.35	2.67	2.73	1.41	2.61	1.82 ± 1.33	1.52	2.7	1.33	1.16	1.37	1.62 ± 0.62	1.23	1.31	0.5	1.13	1.53	1.41	1.14 ± 0.46	1.62	1.05	1.36	1.05	1.29	1.17	1.22 ± 0.13	1.23	1.07	1.29	1.14	1.26
BcellWH2_03566	-	-	-	-	-	-	-	-	-	-	-	-	-	-	-	-	-	-	-	-	-	-	-	-	-0.63	-0.82	0.33	-0.69	0.24	-0.31 ± 0.55	-1.25	-0.87	-1.55	-1.34	-1.01	-0.81	-1.18 ± 0.33	-0.72	0.11	-0.33	-0.02	-1.04	-0.72	-0.53 ± 0.45	-0.48	-0.78	-1.19	-0.12	-0.71
BcellWH2_03567	0.54	0.95	0.67	1.06	1	0.84 ± 0.22	0.58	0.66	0.59	0.9	0.71	0.69 ± 0.13	0.85	0.51	0.4	0.24	0.6	0.52 ± 0.23	0.58	0.49	0.56	0.44	0.21	0.46 ± 0.15	1.27	1.28	1.14	1	1.13	1.17 ± 0.11	0.48	0.54	1	0.93	1.03	0.99	0.99 ± 0.04	1.14	0.6	1.09	1.1	0.96	-1.22	0.48 ± 1.14	0.22	-0.02	0.95	0.73	0.98
BcellWH2_03568	-0.56	-0.26	-0.74	-0.88	0.03	-0.48 ± 0.37	-0.03	-0.55	-0.53	0.03	0.09	-0.2 ± 0.31	-0.04	-1.51	-0.66	-0.1	-0.71	-0.6 ± 0.59	0.09	-0.75	-0.38	0.19	-0.05	-0.18 ± 0.38	-0.43	-0.91	0.81	-0.36	-0.72	-0.32 ± 0.67	0.59	0.21	-0.14	0.46	0.27	0.42	0.25 ± 0.27	-0.85	-0.38	-0.93	-0.09	0.34	0.57	-0.03 ± 0.66	0.57	-0.85	-0.13	0.41	-0.19
BcellWH2_03575	-0.74	-0.72	-1.5	-1.06	-0.31	-0.86 ± 0.44	-0.2	-1.06	-0.33	-0.02	-0.31	-0.38 ± 0.4	-0.69	-0.67	-0.67	-0.24	-0.63	-0.58 ± 0.19	-0.65	0.1	-0.94	0.19	-0.74	-0.41 ± 0.51	-0.92	-1.36	-0.82	-1.08	-1.18	-1.07 ± 0.21	-0.64	0.23	0.14	-1.19	-0.59	-0.99	-0.66 ± 0.59	-0.95	-0.95	-0.95	0.32	-0.83	-0.75	-0.55 ± 0.59	-1.04	-0.65	-0.51	-0.69	-1.24
BcellWH2_03608	0.5	0.38	0.16	1	0.77	0.56 ± 0.33	0.4	0.13	0.32	0.69	0.47	0.4 ± 0.2	0.47	-0.01	0.4	0.01	0.15	0.2 ± 0.22	-0.11	0.17	0.46	0.67	1.01	0.44 ± 0.44	1.77	0.63	0.84	0.51	0.57	0.87 ± 0.52	0.63	0.83	0.57	0.72	0.96	0.89	0.79 ± 0.18	0.59	0.72	-1.1	0.68	0.72	0.73	0.26 ± 0.9	0.36	0.59	0.48	0.95	0.58
BcellWH2_03610	-	-	-	-	-	-	-	-	-	-	-	-	-	-	-	-	-	-	-	-	-	-	-	-	-0.9	-1.22	-1.23	-0.55	-0.65	-0.91 ± 0.31	-0.48	-0.8	0.31	-0.42	-0.86	-1.06	-0.51 ± 0.61	-0.61	-0.87	-0.84	-0.14	-1.09	-0.98	-0.76 ± 0.43	-1.14	-1.27	-0.94	-0.48	0.14
BcellWH2_03617	-	-	-	-	-	-	-	-	-	-	-	-	-	-	-	-	-	-	-	-	-	-	-	-	-0.43	-0.83	-0.96	-0.93	-1.17	-0.86 ± 0.27	-0.23	-1.06	-0.27	-0.13	0.21	0.23	0.01 ± 0.25	-0.56	0.4	-0.44	-0.1	-1.65	-0.16	-0.59 ± 0.72	-1.1	0.18	-0.99	-1.12	0.36
BcellWH2_03618	-0.49	0.2	0.42	0.22	-1.14	-0.16 ± 0.65	0.01	-0.69	-1.42	-0.93	0.19	-0.57 ± 0.66	-0.22	0.69	-1.18	0.38	-1.07	-0.28 ± 0.84	-0.58	-0.72	-0.61	-0.32	-0.66	-0.58 ± 0.15	-0.45	-0.75	0.56	-0.64	-0.27	-0.31 ± 0.52	-0.36	0.19	-0.37	-0.64	-0.23	-0.14	-0.35 ± 0.22	0.09	-1.38	-0.78	-1.44	-0.5	-0.2	-0.73 ± 0.53	0.09	-0.76	0.13	-0.26	-1.25
BcellWH2_03684	-1.3	-0.73	-1.18	-0.64	-1.09	-0.99 ± 0.29	-0.02	-0.45	-1.2	-0.84	-0.66	-0.63 ± 0.44	-0.81	-0.39	-1.12	-0.13	-0.53	-0.6 ± 0.38	-1.07	-0.91	-0.98	-1.03	-0.66	-0.93 ± 0.16	-	-	-	-	-	-	-	-	-	-	-	-	-	-	-	-	-	-	-	-	-	-	-	-	-
BcellWH2_03711	1.53	0.9	-1.35	-1.09	0.86	0.17 ± 1.3	0.86	0.32	0.51	0.41	0.54	0.53 ± 0.2	-1.13	-1.11	-1.04	-1.38	0.79	-0.77 ± 0.88	0	0.6	1.21	0.8	-1.02	0.32 ± 0.87	-0.81	1	-0.5	-0.32	0.47	-0.03 ± 0.75	-0.09	0.4	-0.13	0.27	0.26	0.26	0.17 ± 0.2	-0.25	-1.36	-0.69	-0.05	-0.1	0.09	-0.19 ± 0.35	0.44	-0.85	0.28	-0.07	-0.83
BcellWH2_03714	-0.08	1.09	0.89	0.94	0.95	0.76 ± 0.47	1.14	0.99	1.05	1.09	1.08	1.07 ± 0.05	1.17	1.32	1.17	1.15	1.19	1.2 ± 0.07	1.22	1.24	0.71	1.3	1.04	1.1 ± 0.24	0.19	0.97	0.07	0.53	0.53	0.46 ± 0.35	0.93	1.55	0.44	0.88	1.47	1.22	1 ± 0.45	1.47	0.61	1.25	0.23	0.75	1.06	0.82 ± 0.45	1.61	1.18	0.97	0.97	0.79
BcellWH2_03715	2.52	2.36	2.25	2.4	2.24	2.35 ± 0.12	2.36	2.62	2.47	2.48	2.47	2.48 ± 0.09	2.49	2.47	2.46	2.44	2.41	2.45 ± 0.03	2.42	2.56	2.35	2.66	2.68	2.53 ± 0.15	2.67	2.59	2.47	2.14	2.59	2.49 ± 0.21	2.65	2.79	2.54	2.54	2.68	2.61	2.59 ± 0.07	2.43	2.45	2.48	2.52	2.66	2.52	2.55 ± 0.08	2.51	2.44	2.39	2.53	2.38
BcellWH2_03716	2.78	2.79	2.78	2.89	2.75	2.8 ± 0.05	2.89	2.99	2.97	2.96	2.97	2.96 ± 0.04	2.82	2.74	2.76	2.79	2.75	2.77 ± 0.03	2.49	2.9	2.84	3.07	2.87	2.84 ± 0.21	3.02	2.79	2.81	2.75	2.91	2.86 ± 0.11	2.92	2.85	2.8	2.9	3.01	2.92	2.91 ± 0.09	2.76	2.75	2.85	2.81	2.82	2.87	2.84 ± 0.03	2.96	2.81	2.77	2.84	2.61
BcellWH2_03769	-	-	-	-	-	-	-	-	-	-	-	-	-	-	-	-	-	-	-	-	-	-	-	-	-0.81	-0.52	-0.46	-0.68	-0.09	-0.51 ± 0.27	-0.98	-0.64	-0.47	-0.42	-1.54	-0.92	-0.84 ± 0.52	-0.63	0.24	-0.34	-0.2	-0.95	-1.04	-0.63 ± 0.42	0.25	-0.48	0.05	-0.38	-0.49
BcellWH2_03771	-	-	-	-	-	-	-	-	-	-	-	-	-	-	-	-	-	-	-	-	-	-	-	-	-1.38	-0.95	-0.82	-1.1	-1.04	-1.06 ± 0.21	-0.74	-0.52	0.15	-0.75	-0.83	-0.5	-0.48 ± 0.44	-1.09	-0.8	-0.99	0.58	-1.13	-1.29	-0.71 ± 0.87	-0.92	-1.16	-0.82	-1.06	-1
BcellWH2_03772	-0.82	-1.12	-0.82	-0.75	-0.76	-0.86 ± 0.15	-0.35	-1.15	-1.2	-0.26	-0.25	-0.64 ± 0.49	-1.08	-0.84	-0.84	0.15	-0.6	-0.64 ± 0.48	-0.29	-0.9	-0.97	0.13	-0.19	-0.44 ± 0.47	-0.02	-0.38	-0.46	0.86	-0.7	-0.14 ± 0.61	-0.28	-0.33	0.03	-1.39	-0.66	-1.11	-0.78 ± 0.62	-0.72	-0.16	-0.86	-1.42	-1.21	-1.01	-1.13 ± 0.24	-0.68	-1.26	-0.08	-1.04	-1.11
BcellWH2_03783	-0.65	-1	-0.6	-0.97	0.29	-0.58 ± 0.52	-1.31	-1.21	0.54	-1.86	1.87	-0.39 ± 1.55	-0.56	-1.02	-0.59	-1.29	-0.69	-0.83 ± 0.31	-0.65	-0.83	-0.75	-0.72	-0.96	-0.78 ± 0.12	-0.86	-0.95	-0.82	-0.91	-0.46	-0.8 ± 0.2	-1.06	0.62	0.07	-1.59	-0.99	0.72	-0.45 ± 1.04	-1.15	-0.91	-0.99	-1.54	-0.74	-0.72	-1 ± 0.38	-1.09	-0.54	-0.85	-0.57	-1.03
BcellWH2_03794	1.13	0.02	0.24	0.2	-0.08	0.3 ± 0.48	0.37	0.6	0.49	0.67	0.91	0.61 ± 0.2	1.06	0.94	0.91	0.61	0.75	0.86 ± 0.18	1.66	0.8	0.73	0.51	0.66	0.87 ± 0.45	0.84	-0.93	1.22	1.66	1.01	0.76 ± 0.99	1.31	0.63	1.28	1.29	1.05	1.08	1.18 ± 0.13	0.48	0.89	0.68	1.28	1.25	1.28	1.12 ± 0.29	0.01	1.14	0.68	0.97	1.1
BcellWH2_03795	1.74	1.38	1.07	1.02	1.35	1.31 ± 0.29	1.44	1.41	1.58	1.53	1.75	1.54 ± 0.14	1.74	1.61	1.6	1.56	1.47	1.6 ± 0.1	1.52	1.59	1.35	1.53	1.41	1.48 ± 0.1	1.71	1.29	1.63	1.72	1.94	1.66 ± 0.24	1.75	1.48	1.87	1.85	1.6	1.81	1.78 ± 0.12	1.55	1.8	1.51	1.82	1.66	1.66	1.66 ± 0.13	1.61	1.67	1.57	1.77	1.68
BcellWH2_03800	2.78	2.72	3.01	3.09	3	2.92 ± 0.16	3.14	3.17	3.24	3.22	3.25	3.2 ± 0.05	3.17	3.1	3.09	3.03	3.08	3.1 ± 0.05	2.77	3.08	3.1	3.01	3.13	3.02 ± 0.15	3.03	3.03	3.06	2.94	2.91	2.99 ± 0.07	3.06	3.05	3.08	3.14	3.11	3.15	3.12 ± 0.03	2.91	3.16	3.06	3.1	3.07	3.07	3.08 ± 0.02	2.8	3.14	2.97	2.97	2.84
BcellWH2_03801	2.07	2.18	2.61	2.46	2.56	2.38 ± 0.24	2.76	2.74	2.79	2.8	2.8	2.78 ± 0.03	2.56	2.54	2.7	2.67	2.72	2.64 ± 0.08	2.48	2.46	2.66	2.7	2.69	2.6 ± 0.12	2.48	2.53	2.57	2.44	2.53	2.51 ± 0.05	2.55	2.56	2.54	2.75	2.67	2.78	2.68 ± 0.11	2.59	2.59	2.61	2.77	2.71	2.68	2.69 ± 0.06	2.45	2.7	2.58	2.65	2.58
BcellWH2_03805	-	-	-	-	-	-	-	-	-	-	-	-	-	-	-	-	-	-	-	-	-	-	-	-	-1.3	-1.16	-0.87	-0.04	-0.71	-0.82 ± 0.49	-0.94	-0.69	-1.37	-0.67	-0.79	-1.42	-1.06 ± 0.39	-1.28	-0.77	0.82	-0.96	-0.79	-0.38	-0.33 ± 0.8	-0.85	-0.74	-1.06	-0.62	-0.84
BcellWH2_03810	0.01	0.04	-0.39	0.51	-0.13	0.01 ± 0.33	0.97	0.78	0.81	0.76	0.96	0.86 ± 0.1	0.29	0.63	-1.02	0.16	-1.03	-0.19 ± 0.78	0.25	0.49	-0.43	1.01	0.33	0.33 ± 0.51	0.08	-0.75	0.22	1.01	0.55	0.22 ± 0.65	0.93	1.34	0.88	0.86	0.81	0.83	0.84 ± 0.03	0.63	0.94	0.33	0.3	0.68	0.85	0.54 ± 0.27	0.91	0.75	0.84	1.03	0.73
BcellWH2_03811	0.2	-0.33	-0.92	-1.36	-1.57	-0.8 ± 0.73	-0.05	0.06	0.01	0.13	-0.06	0.02 ± 0.08	-0.97	0.13	-0.33	-0.25	-1.11	-0.51 ± 0.52	-0.39	0.48	-0.14	-0.05	0.03	-0.02 ± 0.32	-0.38	-1.18	-1.15	-0.31	-1.25	-0.86 ± 0.47	1.13	0.84	1.01	0.8	0.71	0.44	0.74 ± 0.23	-0.89	0.48	-0.82	-0.72	0.22	1.12	-0.05 ± 0.91	0.58	-1.27	-1.35	-0.22	0.57
BcellWH2_03816	1.19	0.3	-1.13	-1.37	0.02	-0.2 ± 1.06	0.48	0.22	0.27	0.39	0.43	0.36 ± 0.11	-0.34	-1.19	-0.8	0.41	0.21	-0.34 ± 0.67	-0.14	0.7	-1.1	0.18	0.55	0.04 ± 0.71	-0.44	-0.9	1.3	-0.61	1.02	0.07 ± 1.01	1.42	-0.05	0.64	0.26	0.8	0.49	0.55 ± 0.23	-0.24	-0.21	0.51	0.35	0.63	0.44	0.48 ± 0.12	-1.62	-1.2	0.41	0.62	-1.25
BcellWH2_03817	-0.46	0.4	0.7	0.46	0.66	0.35 ± 0.47	0.45	0.6	0.38	0.3	0.37	0.42 ± 0.11	-1.51	0.24	0.71	-0.14	0.53	-0.03 ± 0.89	-0.33	0.31	-0.99	-0.1	0.13	-0.19 ± 0.51	-0.48	0.58	0.05	-0.88	0.5	-0.05 ± 0.63	0.5	0.9	0.82	0.64	0.59	0.49	0.63 ± 0.14	-0.16	0.4	0.58	0.83	0.55	0.75	0.68 ± 0.14	0.57	-1.14	0.13	0.71	0.79
BcellWH2_03825	-	-	-	-	-	-	-	-	-	-	-	-	-	-	-	-	-	-	-	-	-	-	-	-	-0.88	-1.18	-0.68	-1.23	-0.75	-0.94 ± 0.25	-0.97	-0.82	-0.48	-1.13	-0.54	-1.21	-0.84 ± 0.38	-0.93	-0.38	-1.1	-0.96	-1.01	-1.22	-1.07 ± 0.11	-0.81	-0.72	-1.42	0.16	-0.85
BcellWH2_03827	-	-	-	-	-	-	-	-	-	-	-	-	-	-	-	-	-	-	-	-	-	-	-	-	-0.56	-0.22	-0.92	-0.9	-0.68	-0.65 ± 0.29	-0.54	-1.31	-1.57	-0.09	-1.25	-0.55	-0.87 ± 0.67	-0.39	-0.8	-0.96	-1.32	-0.32	-0.93	-0.88 ± 0.41	-0.86	-0.92	-0.54	0.02	-0.02
BcellWH2_03829	-1.09	-0.86	-0.91	-0.89	-1.3	-1.01 ± 0.19	-0.16	-1.04	-1.12	-1.12	-1.09	-0.91 ± 0.42	-0.77	-0.76	-0.94	-0.82	-1.07	-0.87 ± 0.13	-0.65	-0.58	-1.11	-0.89	-0.67	-0.78 ± 0.22	-0.79	-1.06	-1.04	-1.26	-1.27	-1.08 ± 0.2	-0.95	-1.1	-1.34	-1.02	-0.71	-0.56	-0.9 ± 0.35	-0.86	-0.74	-0.5	-0.87	-0.84	-1.26	-0.87 ± 0.31	-0.71	-1.17	0.06	-0.39	-0.7
BcellWH2_03849	-1.33	-1.1	-0.51	-0.61	-0.99	-0.91 ± 0.34	-0.81	-1.14	-0.5	-0.8	-1.03	-0.86 ± 0.24	-0.99	-1.14	-0.69	-0.52	-0.99	-0.86 ± 0.26	-1.48	-0.8	-1.27	-0.61	-1.1	-1.05 ± 0.35	-	-	-	-	-	-	-	-	-	-	-	-	-	-	-	-	-	-	-	-	-	-	-	-	-
BcellWH2_03852	-0.02	-0.08	-0.87	0.23	0.45	-0.06 ± 0.5	-0.3	0.28	-0.05	-0.14	0.02	-0.04 ± 0.21	-1.57	-1.51	0.81	0.25	0.43	-0.32 ± 1.13	-0.13	-1	0.95	0.65	0.59	0.21 ± 0.78	0.23	-0.76	1.28	-0.18	0.94	0.3 ± 0.83	0.18	-1.64	0.47	-1.73	-1.42	-1.4	-1.02 ± 1.01	-0.04	0.62	-0.87	0.55	0.84	-1.08	-0.14 ± 0.98	0.92	0.84	0.1	-0.1	0.8
BcellWH2_03869	-	-	-	-	-	-	-	-	-	-	-	-	-	-	-	-	-	-	-	-	-	-	-	-	-0.88	-0.5	-0.74	-0.79	-0.83	-0.75 ± 0.15	-0.81	-0.87	-1.03	0.11	-0.71	-0.76	-0.6 ± 0.49	-1.14	-0.47	-0.65	-0.01	-1.1	-0.91	-0.67 ± 0.48	-1.21	-0.92	-0.9	-0.76	-0.78
BcellWH2_03870	0.87	-1.12	-0.08	-0.27	-1.27	-0.37 ± 0.87	-0.58	0.13	0.29	0.15	-0.05	-0.01 ± 0.34	1.21	0.73	-0.78	-1.41	-1.29	-0.31 ± 1.2	1.55	-0.66	-0.82	0.36	-1.36	-0.19 ± 1.15	-0.7	-1.22	0.17	-0.81	-0.04	-0.52 ± 0.57	0.39	-0.65	0.72	0.32	-0.48	-0.51	0.01 ± 0.61	0.77	0.57	-0.2	0.39	0.29	0.3	0.19 ± 0.27	0.78	0.66	0.22	0.47	0.79
BcellWH2_03873	-	-	-	-	-	-	-	-	-	-	-	-	-	-	-	-	-	-	-	-	-	-	-	-	0.42	0.32	-0.92	-0.29	1	0.11 ± 0.73	0.03	-0.9	-0.33	-0.5	-1.22	-0.92	-0.74 ± 0.4	-0.12	-0.08	-0.51	0.3	0.53	-1.03	-0.18 ± 0.73	-1.08	-0.12	-0.93	-1.51	-0.06
BcellWH2_03875	0.85	0.43	0.05	0.03	-0.84	0.1 ± 0.62	-0.07	-0.57	-0.22	0.03	-0.27	-0.22 ± 0.23	-0.53	-0.62	-1.01	0.26	-0.92	-0.56 ± 0.5	-0.2	-0.21	0.29	0.19	0.39	0.09 ± 0.28	0.72	0.17	0.19	1.31	0.38	0.55 ± 0.48	-0.47	-0.1	-0.07	-0.19	-0.01	-0.03	-0.07 ± 0.08	0.73	-1.24	-0.58	0.18	-0.66	-1.37	-0.61 ± 0.63	0.15	-1.09	-0.47	-0.41	-1.12
BcellWH2_03882	1.23	0	0.33	0.15	-1.43	0.06 ± 0.96	-1.28	0.36	-1.29	-1.66	-1.62	-1.1 ± 0.84	-1.11	-0.63	-1.1	-1.13	-0.75	-0.95 ± 0.24	-1.13	-0.71	-0.44	-0.82	-0.75	-0.77 ± 0.25	-0.81	-0.54	0.36	0.37	0.37	-0.05 ± 0.58	-0.44	-0.4	-0.59	-0.38	-1.43	-0.92	-0.83 ± 0.46	-0.24	-0.68	-0.1	-0.23	-0.1	-0.76	-0.3 ± 0.32	-0.66	0.22	0.19	0.1	0.09
BcellWH2_03884	-	-	-	-	-	-	-	-	-	-	-	-	-	-	-	-	-	-	-	-	-	-	-	-	-0.89	-0.72	-0.75	-0.56	-0.42	-0.67 ± 0.18	-0.9	-0.73	-1.07	-1.41	-0.88	-0.89	-1.06 ± 0.25	-0.5	-0.62	-0.94	-1.07	-0.72	-0.83	-0.89 ± 0.15	-0.45	-0.93	-0.78	-0.74	-0.34
BcellWH2_03888	-	-	-	-	-	-	-	-	-	-	-	-	-	-	-	-	-	-	-	-	-	-	-	-	-0.79	-0.97	-0.73	-1.16	-0.95	-0.92 ± 0.17	-0.66	-0.66	0.39	-1.2	-0.94	-0.82	-0.64 ± 0.7	-0.99	-0.86	-1.08	-0.85	-0.59	-0.37	-0.72 ± 0.31	-1.08	-1.24	-0.71	-1.09	-0.93
BcellWH2_03892	0.83	1.01	1.4	1.29	1.13	1.13 ± 0.23	0.84	1.09	1.05	1.13	0.99	1.02 ± 0.11	0.64	1.11	1.06	0.53	0.96	0.86 ± 0.26	0.59	1.13	1.1	1.07	0.89	0.96 ± 0.23	1.12	1.22	1.18	1.43	1.23	1.24 ± 0.12	1.08	1.11	1.04	1.08	1.08	1.2	1.1 ± 0.07	1.2	1.13	1.25	1.09	1	1.12	1.12 ± 0.1	1.39	1.2	1.41	1.32	1.09
BcellWH2_03894	-0.31	-1.49	-1.07	-1.2	-1.06	-1.02 ± 0.43	-0.04	-1.14	-0.94	-0.23	-1.55	-0.78 ± 0.63	-0.91	-1	-0.7	-0.87	-0.82	-0.86 ± 0.11	-1.09	-0.76	-0.58	-1.3	-0.71	-0.89 ± 0.3	-0.74	-0.95	-0.81	-0.44	-0.84	-0.75 ± 0.19	-0.09	-1.07	0.01	0.08	-0.75	-1.22	-0.47 ± 0.62	-1.39	0.01	-0.56	-0.24	-1.78	0.21	-0.59 ± 0.85	-0.85	-1.03	-0.87	-0.18	-0.67
BcellWH2_03895	-0.67	0.19	0.2	0.18	0.21	0.02 ± 0.39	0.38	0.65	0.3	0.37	0.23	0.39 ± 0.16	-0.11	-0.26	-0.22	0.77	0.01	0.04 ± 0.42	0.13	-0.03	-0.05	0.09	0.41	0.11 ± 0.19	0.6	0.57	0.75	0.57	0.53	0.61 ± 0.09	0.71	1.05	1.19	0.41	0.89	0.74	0.81 ± 0.32	0.42	0.55	0.65	1.07	0.48	0.76	0.74 ± 0.25	1.13	0.74	0.93	0.89	0.54
BcellWH2_03898	-0.5	0.97	0.87	0.28	0.68	0.46 ± 0.6	0.56	0.58	-0.02	0.37	0.63	0.42 ± 0.27	0.39	-0.07	0.5	0.65	-1.22	0.05 ± 0.76	1.17	-1.08	-0.95	0.67	0.76	0.11 ± 1.05	0.04	0.55	-0.16	-0.05	0.62	0.2 ± 0.36	0.97	0.4	0.61	0.65	0.97	1.11	0.83 ± 0.24	1.03	-0.68	1.15	0.96	1.13	0.92	1.04 ± 0.12	1.24	1.23	1.3	1.08	0.77
BcellWH2_03919	-	-	-	-	-	-	-	-	-	-	-	-	-	-	-	-	-	-	-	-	-	-	-	-	-0.7	-1.08	-0.63	-0.13	-0.84	-0.67 ± 0.35	-0.74	-0.73	-0.34	-0.97	-0.48	-0.9	-0.67 ± 0.31	-1	-0.63	-1.03	-0.97	-0.96	-1.47	-1.11 ± 0.24	-0.78	-0.88	-0.55	-0.42	-1.33
BcellWH2_03922	-	-	-	-	-	-	-	-	-	-	-	-	-	-	-	-	-	-	-	-	-	-	-	-	-0.85	-0.61	-1.08	-1.1	-0.87	-0.9 ± 0.2	-0.9	-0.58	0.2	-0.9	-1.03	-0.34	-0.52 ± 0.57	-0.97	-0.97	-0.4	-0.67	-0.95	-1.09	-0.78 ± 0.31	-0.96	-0.33	-0.62	-0.9	-0.57
BcellWH2_03925	-0.46	-0.09	0.09	-0.78	0.3	-0.19 ± 0.43	-0.24	-0.16	-2.19	-0.59	-0.35	-0.71 ± 0.85	0.4	0.12	-1.1	-1.31	0.47	-0.29 ± 0.85	-0.62	-1.03	-0.74	0.71	0.72	-0.19 ± 0.84	-0.27	-0.72	0.55	-0.9	0.56	-0.15 ± 0.69	0.42	-2.1	-0.24	0.08	0.27	-1.16	-0.26 ± 0.64	-0.37	0.31	-0.95	-1.91	0.15	0.02	-0.67 ± 0.96	-0.14	-0.7	-0.47	0.31	-1
BcellWH2_03934	1.55	0.62	1.46	1.66	1.35	1.32 ± 0.41	0.96	1.22	1.11	1.12	1.2	1.12 ± 0.1	1.37	1.15	1.49	1.5	1.42	1.38 ± 0.14	1.62	1.19	1.43	1.17	1.35	1.35 ± 0.19	1.57	1.94	1.55	1.77	2.05	1.78 ± 0.22	1.84	1.64	1.68	1.6	1.56	1.54	1.6 ± 0.06	1.53	1.59	1.73	1.94	1.7	1.8	1.79 ± 0.11	1.82	1.66	1.9	1.96	1.48
BcellWH2_03936	1.09	-0.02	0.24	0.46	-0.28	0.3 ± 0.52	-0.37	-1.54	-0.02	-0.39	-0.43	-0.55 ± 0.58	0.26	0.4	-1.24	-1.63	-0.06	-0.45 ± 0.92	-0.5	-1.16	0.78	0.38	0.6	0.02 ± 0.82	-1.1	0.14	0.5	1.04	-0.51	0.02 ± 0.84	-0.25	0.31	-0.06	-0.13	0.1	0.21	0.03 ± 0.16	-0.19	-0.07	-0.79	-0.35	-0.35	-0.17	-0.41 ± 0.27	-1.06	-0.3	0.27	0.09	-0.03
BcellWH2_03937	-	-	-	-	-	-	-	-	-	-	-	-	-	-	-	-	-	-	-	-	-	-	-	-	0.84	-0.36	0.61	-0.03	0.01	0.21 ± 0.5	0.01	0.06	-1.46	-0.41	-0.04	0.12	-0.45 ± 0.71	0.69	0.24	0.15	-1.68	-1.48	-1.1	-1.03 ± 0.82	-0.92	-1.03	0.14	-0.01	-1.06
BcellWH2_03940	-	-	-	-	-	-	-	-	-	-	-	-	-	-	-	-	-	-	-	-	-	-	-	-	-0.2	-0.9	-0.94	-0.93	-1	-0.79 ± 0.34	-1.01	0.06	-1.07	0.59	-0.99	-0.94	-0.6 ± 0.8	-0.81	-0.8	-0.89	-1.09	-0.73	-0.69	-0.85 ± 0.18	-1.04	-0.95	-0.99	-1.12	-0.53
BcellWH2_03941	1.22	1.21	0.99	1.11	0.91	1.09 ± 0.13	1.27	1.02	1.09	1.36	1.15	1.18 ± 0.14	0.93	0.82	0.49	1.13	1.09	0.89 ± 0.26	1.02	1.11	1.01	0.77	1.24	1.03 ± 0.17	1.06	0.96	0.3	0.69	1.29	0.86 ± 0.38	1.21	1.05	1.31	1.24	0.93	0.81	1.07 ± 0.24	1.03	1.32	0.88	1.41	1.28	1.34	1.23 ± 0.24	1.46	1.31	1.01	1.34	1.42
BcellWH2_03969	-0.62	-1.19	0.19	-0.43	-1.37	-0.68 ± 0.62	-0.11	-1.38	-0.91	-1.48	-0.52	-0.88 ± 0.58	-0.56	-0.37	-0.54	-1.11	-1.13	-0.74 ± 0.35	-0.57	0.25	-0.97	-0.84	-0.87	-0.6 ± 0.5	-	-	-	-	-	-	-	-	-	-	-	-	-	-	-	-	-	-	-	-	-	-	-	-	-
BcellWH2_03985	0.89	-0.56	0.6	1.14	0.83	0.58 ± 0.67	0.7	1.28	1.1	0.67	1.07	0.96 ± 0.27	1.11	1.09	0.78	0.65	0.28	0.78 ± 0.35	0.73	0.59	0.44	0.93	0.68	0.67 ± 0.18	1.61	0.97	1.55	1.54	1.28	1.39 ± 0.27	1.05	0.14	1.52	1.51	1.18	1.04	1.31 ± 0.24	1.29	1.4	1.16	1.23	1.11	1.08	1.15 ± 0.06	0.85	1.11	1.19	1.31	1.04
BcellWH2_03987	-	-	-	-	-	-	-	-	-	-	-	-	-	-	-	-	-	-	-	-	-	-	-	-	-0.53	-0.72	0.34	-0.94	-0.01	-0.37 ± 0.52	-0.66	-0.98	0.07	-0.56	-1.05	0.02	-0.38 ± 0.53	-0.58	-0.91	-1.03	-1.12	-0.76	-1.17	-1.02 ± 0.18	-0.62	0.13	-1.1	-1.1	-0.65
BcellWH2_03991	-0.8	0.27	-0.77	-0.71	-0.71	-0.54 ± 0.45	-0.63	-0.42	-0.63	-0.49	-1.61	-0.76 ± 0.49	-0.83	-0.74	-1.37	-1.22	-0.73	-0.98 ± 0.3	-1.08	-0.71	-0.48	-0.67	-1.24	-0.83 ± 0.31	0.7	-0.02	0.23	-0.26	0.08	0.15 ± 0.36	0.25	-1.35	0.1	-0.41	-0.14	-0.12	-0.14 ± 0.21	-0.22	-0.11	0.25	-0.29	-0.56	-0.44	-0.26 ± 0.36	0.27	0.68	-1.13	-1.56	-1.18
BcellWH2_04013	-0.83	-1.24	-0.73	-0.84	0.13	-0.7 ± 0.51	-0.59	-1.15	-1.07	0.01	-0.61	-0.68 ± 0.46	-0.88	-1.34	-0.98	-1.07	-1.22	-1.1 ± 0.18	-0.58	-0.72	-0.92	-0.89	-0.49	-0.72 ± 0.19	-0.6	-0.86	-0.71	-1.02	-1.06	-0.85 ± 0.2	-0.99	-0.88	-1.44	-0.03	-0.76	-0.64	-0.72 ± 0.58	-0.7	-0.73	-0.93	-0.73	-0.79	-0.91	-0.84 ± 0.1	-0.91	-0.63	-0.85	-0.71	-1.08
BcellWH2_04037	-	-	-	-	-	-	-	-	-	-	-	-	-	-	-	-	-	-	-	-	-	-	-	-	-0.73	-0.72	-0.45	-0.82	-0.64	-0.67 ± 0.14	-0.88	-1.05	-1.13	-0.36	-0.43	-0.74	-0.66 ± 0.35	-0.94	-1.09	-1.24	-0.48	-0.84	-1	-0.89 ± 0.32	-0.66	-1.27	-0.89	-0.86	-0.54
BcellWH2_04041	-1.04	-0.95	-1.12	-0.91	-0.65	-0.93 ± 0.18	-1.51	-0.14	-0.57	-1.07	-0.15	-0.69 ± 0.6	0.5	-0.9	-0.93	-0.68	-0.93	-0.59 ± 0.62	-0.76	-0.81	-0.91	-0.71	-1.13	-0.87 ± 0.17	-1	-1.13	-0.77	-1.07	-0.54	-0.9 ± 0.25	-0.76	-0.6	-0.08	-0.92	-1.02	-0.72	-0.68 ± 0.42	-1.4	-0.83	-1.16	-0.79	-0.92	-0.44	-0.83 ± 0.3	-0.86	-1.21	-0.69	-0.73	-0.8
BcellWH2_04042	0.35	0.31	0.41	-0.91	0.11	0.05 ± 0.55	-2.2	-1.25	-1.59	-1.6	-1.86	-1.7 ± 0.35	-1.01	0.13	-0.2	-0.25	1.74	0.08 ± 1.02	-0.43	1.6	-0.68	-0.74	-0.74	-0.2 ± 1.01	-0.89	-1.04	-0.78	-0.89	-0.9	-0.9 ± 0.09	0.53	-0.83	-1.64	-1.03	-0.26	-1.23	-1.04 ± 0.58	-0.64	-0.44	-0.89	-0.73	-0.81	-0.56	-0.75 ± 0.14	-0.8	-1.06	-0.82	-0.88	-0.85
BcellWH2_04043	-	-	-	-	-	-	-	-	-	-	-	-	-	-	-	-	-	-	-	-	-	-	-	-	0.07	-0.67	-0.76	-0.54	-0.85	-0.55 ± 0.37	0.36	-0.78	-1.91	-1	0.02	0.48	-0.6 ± 1.07	-0.37	-0.68	-0.36	-1.07	-1.42	-1.16	-1 ± 0.45	0.44	-0.77	0.28	0.12	-0.5
BcellWH2_04044	-0.25	0.27	0.05	0.28	0.51	0.17 ± 0.29	0.2	0.2	0.21	-0.1	0.01	0.1 ± 0.14	-0.1	-0.22	0.4	0.13	0.29	0.1 ± 0.26	-0.32	0.74	-1.19	-0.1	0.22	-0.13 ± 0.72	-0.13	0.87	-1.52	1.22	0.46	0.18 ± 1.08	-1.44	0.32	-1.56	-1.62	0.57	0.72	-0.47 ± 1.29	0.6	0.44	1.03	0.53	0.69	0.57	0.7 ± 0.23	1	1.02	0.43	0.46	-1.54
BcellWH2_04046	-	-	-	-	-	-	-	-	-	-	-	-	-	-	-	-	-	-	-	-	-	-	-	-	-0.9	-1.24	-0.64	-0.45	-0.57	-0.76 ± 0.32	-0.54	-0.79	0.33	-1.06	-1.06	-0.72	-0.63 ± 0.66	-1.08	-0.64	-0.75	-1.11	-0.26	-0.97	-0.77 ± 0.37	-0.87	-0.89	-0.56	-0.56	-0.87
BcellWH2_04047	-	-	-	-	-	-	-	-	-	-	-	-	-	-	-	-	-	-	-	-	-	-	-	-	-0.71	-0.63	-0.63	-0.31	-0.75	-0.61 ± 0.17	0.2	-0.81	-0.06	-0.46	-0.06	-0.17	-0.19 ± 0.19	-1.04	-1	-0.43	-1.03	-0.79	-0.7	-0.74 ± 0.25	-0.31	-0.46	-1.23	-0.88	-0.9
BcellWH2_04048	-1.2	-0.83	-1.07	-1.29	-0.63	-1 ± 0.27	-0.21	-0.94	-0.94	-0.79	-1.32	-0.84 ± 0.4	-1.1	-0.96	-1.3	-0.78	-1.31	-1.09 ± 0.23	-0.66	-1.15	-1.16	-0.68	-1.06	-0.94 ± 0.25	-0.63	-1.12	-1.25	-0.45	-0.77	-0.84 ± 0.33	-1.33	0.37	-0.19	-0.4	-0.9	0.47	-0.26 ± 0.57	-1.07	-1.19	-1.04	-0.78	-0.54	-0.96	-0.83 ± 0.22	-0.62	-1.16	-1.03	-1.09	-0.38
BcellWH2_04054	1.91	1.17	1.87	2.03	1.81	1.76 ± 0.34	1.67	2.06	2.03	2.02	1.98	1.95 ± 0.16	2.3	1.98	1.98	1.7	1.91	1.97 ± 0.22	1.97	1.39	1.75	1.72	1.88	1.74 ± 0.22	2.1	2.19	1.97	1.71	2.16	2.02 ± 0.2	2.38	2.26	2.15	2.32	2.16	2.38	2.25 ± 0.12	1.72	1.96	1.88	1.86	1.7	1.77	1.81 ± 0.08	1.83	2.11	1.79	2.01	1.99
BcellWH2_04055	2.09	2.04	1.99	1.92	1.83	1.97 ± 0.1	2.11	2.07	2.18	2.15	2.12	2.13 ± 0.04	1.76	1.82	1.44	1.66	1.13	1.56 ± 0.28	1.6	1.65	1.62	2	1.84	1.74 ± 0.17	1.99	1.84	1.69	2.09	1.91	1.91 ± 0.15	2.22	2.16	1.96	2.18	2.25	2.33	2.18 ± 0.16	1.36	1.84	1.38	1.71	1.76	1.64	1.62 ± 0.17	1.71	1.92	1.9	1.93	1.62
BcellWH2_04056	1.88	1.47	1.41	1.91	1.65	1.67 ± 0.23	1.82	2.06	2.1	1.86	2.08	1.98 ± 0.13	2.31	2.23	2.05	1.27	1.51	1.88 ± 0.46	2.13	1.48	1.08	1.69	1.5	1.58 ± 0.38	2.06	1.57	1.54	1.68	1.78	1.73 ± 0.21	2.16	1.95	1.92	1.92	2.08	1.92	1.96 ± 0.08	1.43	1.7	1.38	1.5	1.93	1.39	1.55 ± 0.26	1.66	1.78	1.85	1.7	1.64
BcellWH2_04057	-1.04	-1.41	-0.63	-0.71	-1.27	-1.01 ± 0.34	0.63	0.22	-1.96	0.59	0.51	0 ± 1.11	0.38	-0.28	-0.36	-1.21	-0.92	-0.48 ± 0.62	-0.35	-1.04	-0.89	-0.81	-0.69	-0.76 ± 0.26	-1.07	-1.15	-0.85	-0.66	-0.67	-0.88 ± 0.22	-1.52	-0.9	-0.2	-0.04	-1.03	0.23	-0.26 ± 0.54	-1.26	0.66	-0.83	-1.03	-0.11	-0.79	-0.69 ± 0.4	-0.78	-0.94	-0.93	-1.29	-0.54
BcellWH2_04058	-0.93	-1.06	-0.97	-1.21	-1.34	-1.1 ± 0.17	-1.6	-1.22	-0.09	-1.28	-0.43	-0.92 ± 0.63	0.06	-1.15	-0.77	-0.02	-0.18	-0.41 ± 0.52	-0.91	-0.92	-0.69	-0.62	-0.62	-0.75 ± 0.15	-	-	-	-	-	-	-	-	-	-	-	-	-	-	-	-	-	-	-	-	-	-	-	-	-
BcellWH2_04059	-1.02	-1.02	1.03	-1	-0.36	-0.47 ± 0.89	0.2	1.01	0.32	0	-0.52	0.2 ± 0.56	0.27	-1.22	-0.4	-1.06	-0.78	-0.64 ± 0.6	-0.19	-0.88	-0.16	-0.54	-0.64	-0.48 ± 0.31	0.25	-1.01	0.4	0.85	-1.29	-0.16 ± 0.94	0.56	0.41	0.57	0.92	0.52	0.59	0.65 ± 0.18	-0.24	-1.24	-0.74	0.28	0.03	-0.29	-0.18 ± 0.44	0.21	0.53	0.17	0.28	0.59
BcellWH2_04060	-0.92	-0.04	-1.14	-0.65	-0.02	-0.55 ± 0.51	-0.51	-1.19	-1.03	-0.36	-0.42	-0.7 ± 0.38	-0.7	0.11	-0.89	0.25	-0.63	-0.37 ± 0.51	-0.71	-0.77	-1.04	-1.13	-0.86	-0.9 ± 0.18	-	-	-	-	-	-	-	-	-	-	-	-	-	-	-	-	-	-	-	-	-	-	-	-	-
BcellWH2_04061	-	-	-	-	-	-	-	-	-	-	-	-	-	-	-	-	-	-	-	-	-	-	-	-	-0.86	-0.73	-1.01	-0.99	-1.07	-0.93 ± 0.13	-0.59	-0.76	-0.78	-1.11	-0.73	-1.01	-0.91 ± 0.18	-0.77	-0.74	-0.96	-0.63	-0.67	-0.88	-0.79 ± 0.16	-0.67	-0.69	-0.62	-1.16	-0.43
BcellWH2_04062	-	-	-	-	-	-	-	-	-	-	-	-	-	-	-	-	-	-	-	-	-	-	-	-	-0.76	-1.06	-0.77	-1.37	-0.7	-0.93 ± 0.28	-0.74	-0.75	-0.55	-0.71	-0.56	-0.84	-0.66 ± 0.14	-1.3	-0.47	-0.92	-0.8	-1.13	-0.93	-0.94 ± 0.14	-0.79	-0.77	-1.14	-0.37	-0.72
BcellWH2_04067	1.16	0.97	0.53	0.59	0.94	0.84 ± 0.27	0.33	0.6	0.41	0.69	0.32	0.47 ± 0.17	0.35	0.1	-0.07	0.56	-0.02	0.18 ± 0.27	-0.05	0.28	0.27	0.47	0.68	0.33 ± 0.27	1.48	1.32	1.25	1.18	0.71	1.19 ± 0.29	0.65	0.87	0.85	0.8	1.01	0.96	0.9 ± 0.1	1.41	0.87	1.03	0.9	0.7	0.71	0.83 ± 0.16	1.04	1.18	1.02	0.94	0.85
BcellWH2_04068	-0.94	-1.22	-1.04	-0.43	-1.27	-0.98 ± 0.33	-0.28	0.35	-0.98	-1.33	0.14	-0.42 ± 0.72	-1.04	-0.85	-1.09	-0.35	-1.33	-0.93 ± 0.37	-0.61	-0.84	0.44	-0.72	-0.47	-0.44 ± 0.51	-0.52	-0.61	0.05	-0.44	-1.17	-0.54 ± 0.44	-0.76	-1.34	-0.96	-1.22	0.67	-1.14	-0.66 ± 0.89	-0.54	-0.98	-1	0.3	-1.51	-0.61	-0.7 ± 0.76	-0.72	-0.33	-0.99	-0.55	-0.46
BcellWH2_04077	-0.36	0.51	-0.07	0.74	0.18	0.2 ± 0.44	-2.32	-1.43	0.02	-0.35	-0.17	-0.85 ± 1	-1.42	0.93	0.74	-1.2	-0.87	-0.36 ± 1.11	-0.36	-0.19	-0.84	-0.68	-1.23	-0.66 ± 0.41	-0.6	-1.08	-0.87	-1.13	-0.85	-0.91 ± 0.21	-1.02	-0.85	-0.65	-1.27	-0.62	-1.59	-1.03 ± 0.48	-1	-0.86	-0.88	0.3	-1.01	-0.75	-0.59 ± 0.6	-0.73	-1.5	-0.66	0.69	0.26
BcellWH2_04078	-	-	-	-	-	-	-	-	-	-	-	-	-	-	-	-	-	-	-	-	-	-	-	-	-0.81	-0.9	-1.04	-0.7	-1.36	-0.96 ± 0.25	0.83	0.78	0.45	0.64	0.75	0.97	0.7 ± 0.22	1.89	1.14	-0.68	-1.84	0.34	0.85	-0.33 ± 1.19	-0.96	-1.14	-1.1	-1.7	1.52
BcellWH2_04086	-	-	-	-	-	-	-	-	-	-	-	-	-	-	-	-	-	-	-	-	-	-	-	-	-1.25	-0.78	-0.75	-0.35	-0.78	-0.78 ± 0.32	-1.04	-0.68	-0.34	-1.32	-0.87	-0.79	-0.83 ± 0.4	-0.91	-0.69	-1.58	-0.26	-0.87	-0.86	-0.89 ± 0.54	-0.71	-0.98	-0.5	-1.08	-0.51
BcellWH2_04088	1.86	1.66	1.47	1.54	1.64	1.63 ± 0.15	1.57	1.59	1.64	1.6	1.57	1.59 ± 0.03	1.5	1.56	1.54	1.62	1.36	1.52 ± 0.1	1.39	1.27	1.48	1.65	1.76	1.51 ± 0.2	1.92	1.93	1.68	1.56	1.81	1.78 ± 0.16	1.41	1.87	1.94	1.96	2.12	2.03	2.01 ± 0.08	2.15	2.02	2.35	1.58	2.01	1.96	1.98 ± 0.32	2.08	2.07	2.14	1.98	2.02
BcellWH2_04090	-	-	-	-	-	-	-	-	-	-	-	-	-	-	-	-	-	-	-	-	-	-	-	-	-0.91	-0.95	-0.45	-0.92	-0.89	-0.82 ± 0.21	-0.52	-0.64	-1.2	-1.26	-0.69	-0.16	-0.83 ± 0.52	-0.62	-0.56	-1.18	-0.99	-0.92	-0.53	-0.9 ± 0.27	-0.7	-1.21	-0.82	-0.67	-0.7
BcellWH2_04091	-0.04	-1.68	-1.57	-1.24	-1.27	-1.16 ± 0.65	0.25	0.54	0.72	0.36	0.52	0.48 ± 0.18	1.22	0.74	0.81	0.51	0.48	0.75 ± 0.3	0.2	-0.81	-0.21	-1.08	-0.81	-0.54 ± 0.52	-0.21	-0.94	-0.94	-0.35	-1.17	-0.72 ± 0.42	0.78	0.83	0.53	0.52	0.55	0.95	0.64 ± 0.21	1.61	0.49	-0.87	0.38	0.3	0.71	0.13 ± 0.69	-0.7	-0.88	-1.25	-1.47	-1.28
BcellWH2_04092	-0.77	-1.53	-1.62	-0.93	-0.96	-1.16 ± 0.38	0.58	0.31	0.58	0.5	0.72	0.54 ± 0.15	0.35	-0.01	-0.95	-1.18	0.8	-0.2 ± 0.85	-0.81	-1.03	-0.73	-0.38	-0.45	-0.68 ± 0.27	-0.09	-0.82	-0.32	-0.27	-0.7	-0.44 ± 0.3	0.56	1	0.38	0.38	0.91	1.01	0.67 ± 0.34	-0.39	-1.2	0.33	-1.79	-1.22	-0.91	-0.9 ± 0.9	-0.74	-0.91	-1.17	-0.73	-1.06
BcellWH2_04093	-0.65	-0.92	-0.71	-0.64	-0.85	-0.75 ± 0.12	-0.67	0.74	-1.14	0.18	0.65	-0.05 ± 0.83	0.31	-0.53	-0.76	-1.25	-0.6	-0.57 ± 0.56	-0.87	-0.88	-0.69	-0.96	-0.69	-0.82 ± 0.12	-0.62	-0.39	-0.58	-0.35	-1.66	-0.72 ± 0.54	0.62	0.85	0.16	-0.04	0.63	1.15	0.48 ± 0.53	0.18	0.15	0.2	-1.18	-0.64	-0.61	-0.56 ± 0.57	-0.96	-1.06	-0.92	-1.34	-0.47
BcellWH2_04095	-	-	-	-	-	-	-	-	-	-	-	-	-	-	-	-	-	-	-	-	-	-	-	-	-0.48	-0.47	-0.43	-1.03	0.12	-0.46 ± 0.41	-0.88	-1.01	-0.28	-0.19	-1.17	-1.02	-0.67 ± 0.5	-0.84	-1.06	-0.82	-0.16	-0.16	-0.05	-0.3 ± 0.35	-1.42	-0.09	-0.15	-0.3	-0.88
BcellWH2_04097	-0.67	-1.43	-0.96	-0.65	-0.73	-0.89 ± 0.33	-1.78	0.33	0.22	-0.52	-0.13	-0.37 ± 0.85	-0.03	-0.03	-1.03	-1.01	-1.13	-0.65 ± 0.57	-0.91	-0.57	-1.2	-0.68	-0.62	-0.8 ± 0.26	-0.62	-0.49	-0.75	-0.74	-1.08	-0.74 ± 0.22	-0.02	0.41	0.48	-0.03	0.51	0.44	0.35 ± 0.25	-0.62	-0.8	-0.4	-1.41	-0.63	-0.57	-0.75 ± 0.45	-0.89	-0.58	-1.06	-1.17	-0.74
BcellWH2_04098	-0.48	-1.19	-1.52	-0.99	-1.14	-1.06 ± 0.38	0.64	0.36	0.65	0.55	0.65	0.57 ± 0.13	0.91	0.62	0.46	-0.89	-0.81	0.06 ± 0.84	-0.26	-0.86	-0.85	-0.94	-0.83	-0.75 ± 0.28	-0.39	-0.64	-1.35	-0.28	-1.24	-0.78 ± 0.49	0.56	0.55	0.9	0.59	0.72	0.92	0.78 ± 0.16	-0.45	-0.16	-0.54	-0.55	-0.4	-0.2	-0.42 ± 0.16	-0.37	-0.72	-1.22	-1.33	-0.87
BcellWH2_04099	1.08	-1.45	-1.01	-1.69	-1.28	-0.87 ± 1.12	1.16	0.91	1.34	1.37	1.02	1.16 ± 0.2	0.06	-0.24	0.23	-1.47	0.38	-0.21 ± 0.74	0.11	-0.99	-0.74	-1	-0.3	-0.59 ± 0.48	0.56	0.18	-1.39	-0.52	-0.68	-0.37 ± 0.76	1.56	1.47	1.44	1.38	1.29	1.89	1.5 ± 0.27	1.57	0.7	0.9	0.48	0.69	0.82	0.72 ± 0.18	-0.36	0.05	-0.13	0.11	-1.3
BcellWH2_04101	-1.07	-0.71	-0.91	-0.92	-0.7	-0.86 ± 0.16	0.15	-0.95	-1.08	-1.04	-0.34	-0.65 ± 0.54	-0.9	-0.77	-1.46	-0.79	-0.97	-0.98 ± 0.28	-0.75	-0.63	-0.61	-0.89	-0.8	-0.73 ± 0.12	-0.88	-0.77	-0.69	-0.48	0.11	-0.54 ± 0.39	-0.61	-0.93	-1	-0.05	-0.86	-1.08	-0.75 ± 0.48	-1.31	-0.93	-0.65	-0.13	0.13	-0.14	-0.2 ± 0.33	-0.82	-0.97	-0.81	-0.56	-0.27
BcellWH2_04114	-0.84	0.36	-0.91	0.31	-0.62	-0.34 ± 0.63	-1.59	-0.6	-0.86	-1.48	-0.06	-0.92 ± 0.64	-0.36	-1.18	-0.8	-0.8	-1	-0.83 ± 0.31	-0.43	-0.12	-0.82	-0.75	-0.87	-0.6 ± 0.32	0.78	0.87	0.72	1.19	0.85	0.88 ± 0.18	0.77	-1.41	0.61	0.67	-1.39	0.29	0.04 ± 0.97	-0.24	-1.42	0.98	0.81	0.65	0.99	0.86 ± 0.16	1.09	0.38	-1.1	0.44	-1.42
BcellWH2_04115	-0.86	-1.37	-1.15	0.01	-0.31	-0.73 ± 0.57	-0.12	-0.18	-0.8	-0.79	-1.4	-0.66 ± 0.52	-0.8	-1.16	-0.62	-0.54	-0.52	-0.73 ± 0.27	-0.81	-0.86	-0.56	-1.09	-1.05	-0.87 ± 0.21	-0.54	-0.49	-1.38	-0.65	-1.17	-0.85 ± 0.4	0.21	-0.88	-1.59	-0.28	-0.96	-0.82	-0.91 ± 0.54	-0.85	0.23	-0.74	-0.36	0.19	-0.51	-0.35 ± 0.4	-0.75	0.28	-0.75	-1.22	0.3
BcellWH2_04116	-0.32	0.01	0.17	-0.73	-0.79	-0.33 ± 0.43	-0.19	-0.48	-1.13	-0.39	-0.56	-0.55 ± 0.35	-1.18	-1.32	0.32	0.01	0.31	-0.37 ± 0.81	-0.94	-1.25	0.45	0.76	0.47	-0.1 ± 0.92	-0.38	0.88	-1.03	0.78	-1.18	-0.19 ± 0.97	0.01	0.13	0	-0.01	-0.49	0.01	-0.12 ± 0.24	-0.31	-0.74	0.09	-0.65	-0.58	-1.21	-0.59 ± 0.53	0.45	0.05	0.05	-1.57	0.06
BcellWH2_04117	1.02	0.56	0.45	0.48	0.01	0.5 ± 0.36	0.11	0.45	0.08	0.18	0.14	0.19 ± 0.15	-0.14	0.13	-0.28	0.29	-0.11	-0.02 ± 0.23	-0.51	0.16	0.72	0.1	0.53	0.2 ± 0.47	0.66	0.67	0.58	1	0.29	0.64 ± 0.25	0.16	0.64	0.47	0.37	0.57	0.48	0.47 ± 0.08	0.36	0.01	0.39	-0.03	0.02	0.2	0.14 ± 0.19	0.7	0.22	0.45	0.38	0.23
BcellWH2_04121	-	-	-	-	-	-	-	-	-	-	-	-	-	-	-	-	-	-	-	-	-	-	-	-	-0.99	-0.69	-1.1	-0.86	-0.58	-0.84 ± 0.21	-0.52	-0.17	-1.36	-1.37	-1.2	-0.2	-1.03 ± 0.56	-0.73	-1.08	-0.76	-0.75	-0.82	-0.84	-0.79 ± 0.04	-0.92	-1.12	-1.04	-0.36	-0.68
BcellWH2_04122	-1.26	-0.61	-0.11	-0.83	-0.65	-0.69 ± 0.41	-0.18	0.23	-1.09	0.08	0.05	-0.18 ± 0.53	-0.99	-0.75	-1.01	-1.01	-0.92	-0.94 ± 0.11	-0.92	-1.39	-1.03	-0.49	-0.77	-0.92 ± 0.33	0.01	1.37	-0.28	-0.17	-1.31	-0.08 ± 0.96	0.04	-1.25	-0.87	-0.94	-0.09	0.26	-0.41 ± 0.59	0.12	-1.11	0.64	-0.5	-0.18	-1.02	-0.27 ± 0.7	0.39	-0.04	0.79	-1.63	-0.62
BcellWH2_04132	1.26	1.02	0.65	1.09	1.2	1.04 ± 0.24	0.79	0.68	0.67	0.84	0.78	0.75 ± 0.07	0.02	0.4	0.64	0.94	0.71	0.54 ± 0.35	-0.75	1.11	0.59	1.14	0.92	0.6 ± 0.79	0.39	0.67	0.78	0.77	1.11	0.74 ± 0.26	0.86	1.11	0.81	0.9	0.75	0.83	0.82 ± 0.06	0.89	0.9	1.03	0.92	1.18	1.07	1.05 ± 0.11	0.85	0.87	0.49	1.09	0.98
BcellWH2_04142	-0.8	-0.53	-0.04	0.78	0.55	-0.01 ± 0.68	-0.75	0.42	-0.46	0.34	-1.79	-0.45 ± 0.9	-0.82	-0.78	-0.72	-0.98	0.36	-0.59 ± 0.54	-0.2	-1.01	0.64	-0.53	-1.14	-0.45 ± 0.71	-0.36	-0.69	-0.48	-0.55	-1.09	-0.63 ± 0.28	-0.51	0.2	-1.74	0.32	-1.12	-1.04	-0.9 ± 0.87	-0.74	-0.17	0.25	0.4	0.64	0.09	0.34 ± 0.23	0.1	-0.73	-0.19	-1.39	-0.74
BcellWH2_04163	-1.05	-0.19	-0.91	0.51	-1.05	-0.54 ± 0.69	-0.55	-0.19	-0.37	-0.28	-0.68	-0.42 ± 0.2	-0.97	-0.67	-0.12	-0.09	-0.65	-0.5 ± 0.38	-0.84	-1.14	-0.93	-0.76	-0.74	-0.88 ± 0.17	-0.27	-0.75	-0.47	-0.39	-0.9	-0.55 ± 0.26	-0.62	-0.35	-0.21	-1.45	-1.19	0.01	-0.71 ± 0.72	0.08	-1.2	-0.73	0.19	-0.46	-0.78	-0.45 ± 0.45	0.41	-0.06	0.26	-0.23	-0.93
BcellWH2_04185	2.06	2.3	2.38	2.45	2.09	2.26 ± 0.17	2.23	2.46	2.28	2.4	2.43	2.36 ± 0.1	2.43	2.38	2.27	2.26	2.09	2.29 ± 0.14	2.28	2.26	2.35	2.4	2.52	2.36 ± 0.1	2.7	2.52	2.61	2.79	2.33	2.59 ± 0.18	2.47	2.22	2.22	2.32	2.51	2.52	2.39 ± 0.14	1.83	2.36	2.25	2.34	2.41	2.52	2.38 ± 0.12	2.53	2.53	2.3	2.12	2.37
BcellWH2_04197	-	-	-	-	-	-	-	-	-	-	-	-	-	-	-	-	-	-	-	-	-	-	-	-	-0.71	-0.88	0.52	-1.51	-0.35	-0.59 ± 0.75	-0.82	-0.51	-1.71	-0.47	-0.78	-1.04	-1 ± 0.52	-0.84	-0.87	-1.07	-1.06	-0.77	0.34	-0.64 ± 0.67	0.06	-0.49	-0.6	-1.2	-0.45
BcellWH2_04198	-0.5	0.48	0.1	-0.92	0.08	-0.15 ± 0.55	0.15	0.4	0.4	0.25	0.13	0.27 ± 0.13	0.36	0.35	-0.56	0.28	0.03	0.09 ± 0.39	1.03	0.32	-0.27	-1.37	0.84	0.11 ± 0.97	0.78	0.95	0.84	1.18	0.04	0.76 ± 0.43	0.73	0.63	0.87	0.68	0.52	0.81	0.72 ± 0.15	0.89	0.92	0.98	0.36	0.94	0.67	0.74 ± 0.29	0.9	-1.6	0.86	0.4	0.31
BcellWH2_04203	-0.6	-1.22	-0.87	-0.98	-0.56	-0.84 ± 0.27	-0.6	-1.05	-0.88	-0.3	-1.03	-0.77 ± 0.32	-0.72	-0.52	-1.31	-0.39	-0.74	-0.74 ± 0.35	-1.32	-1	-0.73	-1.17	-0.96	-1.04 ± 0.22	-0.57	-0.94	-0.01	-0.4	0.06	-0.37 ± 0.41	-0.11	-0.92	0.02	-0.49	-1.08	-1.25	-0.7 ± 0.58	-0.76	0.09	-0.57	-0.8	-0.1	-0.61	-0.52 ± 0.3	-0.95	-1.19	-0.83	-0.18	0.16
BcellWH2_04206	-1.07	-0.68	-0.79	-1.19	-0.07	-0.76 ± 0.44	-1.65	0.16	0.08	-0.58	-0.87	-0.57 ± 0.74	-1.16	-0.43	0.26	-0.23	-0.41	-0.4 ± 0.51	-0.51	-0.89	-0.76	-1.08	0.53	-0.54 ± 0.64	-0.35	-0.77	-0.57	-0.37	-0.34	-0.48 ± 0.19	0.17	0.09	0.36	-0.26	-0.72	-0.19	-0.2 ± 0.44	-0.38	-1.03	-0.57	0.08	-0.5	-0.22	-0.3 ± 0.29	-0.06	0.42	0.22	0.05	-0.92
BcellWH2_04207	2.58	2.67	3.19	2.96	2.65	2.81 ± 0.26	2.59	2.8	2.88	2.61	2.52	2.68 ± 0.15	2.51	2.76	2.89	2.71	2.76	2.73 ± 0.14	2.18	2.79	2.99	2.76	2.87	2.72 ± 0.31	2.63	2.5	2.65	2.46	2.65	2.58 ± 0.09	2.48	2.69	2.35	2.39	2.36	2.48	2.4 ± 0.06	2.56	2.61	2.63	2.51	2.51	2.54	2.55 ± 0.06	2.55	2.65	2.56	2.6	2.47
BcellWH2_04208	-0.64	-1.18	-0.85	-0.67	-0.49	-0.77 ± 0.26	-2.11	-0.07	-1.34	-1.88	-1.15	-1.31 ± 0.79	0.43	0.69	0.64	-1.33	0.41	0.17 ± 0.85	0.65	0.1	0.49	0.36	-0.72	0.18 ± 0.54	-0.64	-0.3	-1.06	0.15	-0.02	-0.37 ± 0.49	-0.75	-0.08	0.16	0.06	-0.36	-0.36	-0.13 ± 0.27	0.28	0.15	0.24	0.24	0.09	0.26	0.21 ± 0.08	-0.28	0.03	-0.29	0.08	0.23
BcellWH2_04209	-0.37	0.55	0.09	0.25	-0.04	0.1 ± 0.34	0.31	0.12	0.33	0.46	0.29	0.3 ± 0.12	0.43	0.3	0.66	-0.04	0.4	0.35 ± 0.26	-0.17	0.52	0.61	0.34	0.65	0.39 ± 0.34	0.71	0.47	0.96	0.37	0.92	0.69 ± 0.26	0.62	0.54	0.69	0.82	0.49	0.51	0.63 ± 0.16	-0.58	0.02	0.6	0.77	0.56	1	0.73 ± 0.2	0.59	0.75	0.92	0.82	0.7
BcellWH2_04227	1.06	0.26	-1.29	-1.3	-1.1	-0.47 ± 1.08	0.7	0.41	0.29	0.42	0.79	0.52 ± 0.21	1	0.43	0.62	0.17	-1.37	0.17 ± 0.91	1.36	1.01	1.11	1.31	1.31	1.22 ± 0.15	-1.14	-0.59	-1.34	0.76	-1.02	-0.66 ± 0.84	1.35	1.27	1.19	0.82	1	1.5	1.13 ± 0.29	1.43	1.19	0.77	1.08	0.67	0.83	0.84 ± 0.17	1.58	1.58	1.4	1.59	1.36
BcellWH2_04228	1.09	0.17	-0.77	-1.36	0.06	-0.16 ± 0.94	0.96	1.14	1.09	1.15	0.86	1.04 ± 0.12	1.06	1.09	0.85	0.94	0.74	0.94 ± 0.15	1.59	1.48	1.26	1.43	1.43	1.44 ± 0.12	-0.26	-0.96	-0.84	-0.35	-0.25	-0.53 ± 0.34	1.25	1.28	1.09	1.04	1.14	1.46	1.18 ± 0.19	0.9	1.28	0.92	1.1	0.98	0.89	0.97 ± 0.09	1.6	1.41	1.52	1.6	1.33
BcellWH2_04233	-	-	-	-	-	-	-	-	-	-	-	-	-	-	-	-	-	-	-	-	-	-	-	-	-0.87	-0.26	-0.58	-0.76	-0.9	-0.67 ± 0.26	0.84	-0.31	-1.26	-1.53	-0.72	-0.6	-1.03 ± 0.44	-1.1	-0.93	-0.58	-1.07	-1.29	-1.29	-1.06 ± 0.33	1.46	-1.03	-0.43	-0.92	-0.68
BcellWH2_04234	-	-	-	-	-	-	-	-	-	-	-	-	-	-	-	-	-	-	-	-	-	-	-	-	-1.1	-0.97	-0.53	-0.59	-1.02	-0.84 ± 0.26	-0.99	-0.79	-0.93	0.55	-0.93	-0.95	-0.56 ± 0.74	-0.64	-1.33	-0.35	-0.6	1.1	1.44	0.4 ± 1.02	-0.29	-0.01	-0.97	-1.22	-0.82
BcellWH2_04236	-	-	-	-	-	-	-	-	-	-	-	-	-	-	-	-	-	-	-	-	-	-	-	-	-0.03	0.67	-0.95	-0.85	0.13	-0.21 ± 0.69	-0.36	-0.67	-1.7	-0.84	-0.21	0.1	-0.66 ± 0.79	-0.46	-0.35	-0.02	-0.89	-0.92	-1.31	-0.78 ± 0.54	-0.97	-0.72	0.07	-0.06	-0.01
BcellWH2_04243	-0.52	0.89	0.34	0.36	1.19	0.45 ± 0.65	0.89	0.79	0.33	-0.14	0.44	0.46 ± 0.41	0.19	0.57	-1.17	1.01	-0.89	-0.06 ± 0.94	1.12	-0.88	-1.22	0.71	0.11	-0.03 ± 1.01	1.02	-1	1.6	-0.44	0.78	0.39 ± 1.08	0.79	1.08	0.77	0.52	0.48	1.42	0.8 ± 0.43	1.22	0.95	0.2	0.81	0.99	-0.73	0.32 ± 0.77	-1.04	0.43	0.93	-1.73	1.01
BcellWH2_04244	0.16	-0.04	0.48	0.08	0.28	0.19 ± 0.2	0.52	0.23	0.4	0.34	0.25	0.35 ± 0.12	0.85	0.34	-0.17	0.61	0.39	0.4 ± 0.38	-0.54	0.3	-0.58	0.48	0.38	0.01 ± 0.52	1.02	0.98	0.88	0.99	0.86	0.95 ± 0.07	-0.02	-1.3	0.79	0.76	0.79	0.76	0.78 ± 0.02	1	0.98	0.84	0.31	0.84	-0.05	0.49 ± 0.43	-0.49	0.92	0.71	0.75	0.97
BcellWH2_04245	0.93	1.14	0.84	0.92	0.78	0.92 ± 0.14	0.51	0.21	0.6	0.64	0.35	0.46 ± 0.18	-0.06	0.83	0.94	1.01	0.88	0.72 ± 0.44	1.41	1.22	0.64	0.55	0.71	0.91 ± 0.38	-1.59	1.11	0.6	0.96	1.04	0.42 ± 1.14	0.75	0.93	0.92	0.74	0.79	0.78	0.81 ± 0.08	0.96	1.02	1.28	1.09	0.86	1.14	1.09 ± 0.17	1.37	0.92	1.04	1.07	0.93
BcellWH2_04246	-0.35	0.12	-1.04	0.45	0.05	-0.15 ± 0.57	-0.51	0.27	-0.47	-0.61	-0.1	-0.28 ± 0.37	-0.33	-0.42	-0.91	-1.3	0.6	-0.47 ± 0.72	-0.83	-0.09	-0.7	0.32	0.01	-0.26 ± 0.49	0.69	1.05	0.26	-0.39	0.18	0.36 ± 0.55	-0.39	-1.08	0.08	0.27	0	-0.13	0.06 ± 0.17	0.34	0.12	0.45	0.32	-0.93	-0.04	-0.05 ± 0.62	0.74	0.15	-1.4	-0.05	-0.21
BcellWH2_04247	-1.43	0.23	-0.1	-0.46	-0.47	-0.45 ± 0.62	-0.33	-0.86	-1.26	-1.12	-0.1	-0.73 ± 0.5	-1.01	-0.84	-1.31	-0.79	-0.76	-0.94 ± 0.23	-0.6	-0.88	-0.58	-1.17	-0.93	-0.83 ± 0.24	-0.22	-1.07	-0.99	-0.07	0.73	-0.32 ± 0.74	-0.61	-0.87	-1.63	-0.07	-1.01	-0.1	-0.7 ± 0.76	-0.92	-0.78	-1.18	-1.28	0.26	-0.87	-0.77 ± 0.71	0.13	-0.95	-1.04	-1.17	-0.57
BcellWH2_04248	-0.57	-0.33	-1.35	-0.4	-0.72	-0.67 ± 0.41	0.06	-1.07	-0.82	-1.21	-0.34	-0.68 ± 0.53	-0.75	-0.97	-0.92	-0.77	-1	-0.88 ± 0.11	-0.37	-0.59	-0.87	-0.68	-0.59	-0.62 ± 0.18	-0.3	-0.05	-0.33	-0.59	0.09	-0.24 ± 0.26	-0.44	-0.2	-0.26	-0.47	-0.92	-0.1	-0.44 ± 0.35	-0.48	0.04	0.17	-0.39	-0.11	0.19	-0.04 ± 0.27	0	0.13	0.15	0.22	-0.07
BcellWH2_04250	-0.47	0.68	0.16	-0.92	0.55	0 ± 0.68	0.02	-0.2	-0.2	-0.22	-0.09	-0.14 ± 0.1	-0.11	0.38	0.28	0.48	0.54	0.31 ± 0.26	-0.29	-1.63	0.97	0.86	0.17	0.02 ± 1.06	0.55	0.6	0.63	-0.8	0.08	0.21 ± 0.61	0.37	0.58	0.42	0.43	0.43	0.55	0.46 ± 0.06	0.83	0.53	0.61	0.31	0.17	0.25	0.34 ± 0.19	0.19	0.23	0.43	0.29	0.29
BcellWH2_04252	-	-	-	-	-	-	-	-	-	-	-	-	-	-	-	-	-	-	-	-	-	-	-	-	-0.85	-0.87	-0.82	-0.51	-0.58	-0.73 ± 0.17	-0.62	-0.9	-0.21	-0.42	0.61	0.38	0.09 ± 0.49	0.88	0.05	-0.51	-1.36	-0.23	-0.39	-0.63 ± 0.51	0.14	-0.89	-1	-1.22	0.35
BcellWH2_04253	1.48	1.49	1.8	1.66	1.42	1.57 ± 0.16	1.36	1.59	1.62	1.61	1.66	1.57 ± 0.12	1.61	1.55	1.53	1.6	1.7	1.6 ± 0.06	1.41	1.62	1.41	1.72	1.68	1.57 ± 0.15	1.74	1.71	1.86	1.67	2.13	1.82 ± 0.19	1.81	1.61	1.99	2.01	1.69	1.9	1.9 ± 0.15	1.85	2.12	1.88	2.06	2	2.02	1.99 ± 0.08	2.09	1.97	1.94	2.05	2.21
BcellWH2_04255	-0.55	0.1	0.64	-1.46	0.29	-0.2 ± 0.83	-0.77	-0.26	-0.31	-0.56	-0.78	-0.54 ± 0.25	-0.99	-0.51	-0.4	-0.82	-0.45	-0.64 ± 0.26	-0.61	-0.66	-1.28	-1.02	-1.07	-0.93 ± 0.29	0.43	-0.31	-0.23	-0.73	0.13	-0.14 ± 0.44	-0.99	-1.08	-0.41	-0.75	-1.11	-1.19	-0.87 ± 0.36	-0.47	-0.05	-0.98	0.53	-0.15	-1.16	-0.44 ± 0.78	-0.68	0.15	-1.07	-1.14	0.09
BcellWH2_04258	-0.3	1.24	1.02	1.23	1.03	0.85 ± 0.65	0.12	0.1	0.04	0.26	-0.06	0.09 ± 0.12	0.47	0.29	0.08	0.34	-1.22	-0.01 ± 0.69	0.95	-0.16	0.97	-1.28	0.39	0.17 ± 0.94	1.79	1.53	1.48	1.33	1.15	1.46 ± 0.24	0.07	0.76	0.89	0.55	0.51	0.6	0.64 ± 0.17	1.06	0.62	0.67	1.17	0.98	0.66	0.87 ± 0.25	0.94	0.86	0.98	0.99	1.21
BcellWH2_04259	1.88	0.85	0.8	1.08	1.01	1.13 ± 0.44	-0.07	0.09	-1.14	-0.28	-0.45	-0.37 ± 0.47	-1.57	-0.05	-0.03	0.49	-0.59	-0.35 ± 0.78	-0.34	0.41	0.06	0.35	-0.19	0.06 ± 0.33	1.66	0.93	1.49	1.42	0.39	1.18 ± 0.52	-1.88	-1.39	-1.32	-1.2	-1.35	-1.5	-1.34 ± 0.13	-0.61	0.3	-1.11	-0.06	0.25	-0.4	-0.33 ± 0.58	-0.06	0.94	0.25	0.22	-0.29
BcellWH2_04260	2.18	1.08	1.12	0.89	0.95	1.24 ± 0.53	-0.27	-1.4	-0.93	-0.58	-0.18	-0.67 ± 0.5	-0.47	0.5	0.66	0.53	0.33	0.31 ± 0.45	0.95	0.44	0.03	-1.19	-1.24	-0.2 ± 0.98	1.42	1.07	1.14	0.33	0.79	0.95 ± 0.41	-1.25	-0.71	-0.63	-0.45	0.28	-0.83	-0.41 ± 0.48	-0.67	0.56	0.17	0.49	0.42	0.5	0.4 ± 0.16	0.68	0.34	-0.03	0.15	0.02
BcellWH2_04261	-0.83	0.69	0.36	0.84	-0.74	0.07 ± 0.8	-1.56	-1.28	-1.08	-1.77	-1.65	-1.47 ± 0.28	-1.1	0.17	-0.94	0.13	-0.44	-0.43 ± 0.59	-0.96	-1.13	-0.56	0.24	-0.79	-0.64 ± 0.54	1.81	0.98	1.04	-0.29	0.72	0.85 ± 0.75	-1.25	-1.21	-1.9	-2.17	-0.51	-1.56	-1.53 ± 0.73	-0.48	0.42	0.26	-0.03	-0.08	-0.58	-0.11 ± 0.35	0.01	0.45	0.23	-0.65	-1.06
BcellWH2_04262	0.86	0.81	0.57	1.12	0.55	0.78 ± 0.23	-0.66	-0.13	-1.69	-1.93	-1.92	-1.27 ± 0.82	-0.14	-0.02	-0.7	-0.94	-0.89	-0.54 ± 0.43	-0.12	0.45	-0.63	-1.05	0.38	-0.19 ± 0.65	1.48	1.38	1.37	1.52	1.1	1.37 ± 0.17	-1.49	-0.41	-1.1	-1.62	-0.74	-1.16	-1.15 ± 0.36	-0.37	0.56	0.23	0.39	0.5	-0.46	0.17 ± 0.43	-0.44	0.49	0.15	0.31	-1.07
BcellWH2_04263	0.32	0.89	-1.29	0.36	-0.3	0 ± 0.83	-0.64	-1.56	-1.71	-0.88	-0.98	-1.15 ± 0.46	-0.84	-0.34	-0.23	0.32	-1	-0.42 ± 0.53	-0.33	-0.94	-0.4	-0.73	0.45	-0.39 ± 0.53	0.81	0.68	1.2	1.62	0.22	0.91 ± 0.53	-2.16	-1.36	-0.39	-1.27	-1.15	-1.22	-1.01 ± 0.41	-0.4	-0.18	-0.53	-0.13	-0.44	-0.9	-0.5 ± 0.32	-0.49	0.05	0.1	0.39	-0.34
BcellWH2_04265	0.04	-0.18	-0.59	-0.05	-0.61	-0.28 ± 0.3	-1.51	-1.15	-0.96	-1.39	-2	-1.4 ± 0.4	-0.89	-0.83	-1	-0.79	-0.41	-0.78 ± 0.22	-1.07	-0.95	-0.91	-0.71	-0.6	-0.85 ± 0.19	-1.15	-1.08	-0.9	-0.9	-0.5	-0.91 ± 0.25	-0.59	-0.68	-0.99	-0.57	-0.87	-0.85	-0.82 ± 0.17	-0.77	-1.46	-1.13	-0.65	-0.8	-0.85	-0.86 ± 0.2	-0.9	-0.8	-0.46	-0.31	-0.6
BcellWH2_04281	-	-	-	-	-	-	-	-	-	-	-	-	-	-	-	-	-	-	-	-	-	-	-	-	-1.02	-1.03	-0.98	-0.95	-0.53	-0.9 ± 0.21	-0.76	-0.75	-0.92	-0.99	-0.5	-0.63	-0.76 ± 0.23	-0.92	-1.07	-1.14	-0.5	-0.95	-0.87	-0.87 ± 0.27	-0.87	-0.25	-0.98	-0.97	-0.91
BcellWH2_04286	-	-	-	-	-	-	-	-	-	-	-	-	-	-	-	-	-	-	-	-	-	-	-	-	-0.51	-0.72	-0.54	-0.74	-0.69	-0.64 ± 0.11	-1.13	0.27	-1.4	0.09	-0.09	-0.75	-0.54 ± 0.68	-0.71	-1.18	-0.32	-1.03	-1.05	-0.5	-0.72 ± 0.37	-0.93	-0.68	-0.65	-0.96	-1.03
BcellWH2_04288	1.13	0.69	1.14	1.22	1.21	1.08 ± 0.22	0.84	1.28	1.12	1.11	1.05	1.08 ± 0.16	0.68	0.78	1.14	0.74	1.31	0.93 ± 0.28	0.3	0.41	1.25	1.01	1.45	0.88 ± 0.51	0.72	0.17	0.5	-1.09	1.31	0.32 ± 0.89	0.69	0.66	1.03	0.81	0.56	0.42	0.71 ± 0.27	-0.9	1.17	0.64	1.07	0.93	0.81	0.86 ± 0.18	0.93	0.78	0.83	1.26	1.49
BcellWH2_04290	-	-	-	-	-	-	-	-	-	-	-	-	-	-	-	-	-	-	-	-	-	-	-	-	-0.74	-0.58	-1.21	-1.13	-0.9	-0.91 ± 0.26	-0.76	-0.84	-0.58	-1.12	-0.75	-1.04	-0.87 ± 0.25	-0.99	-0.6	-0.98	-0.38	-0.32	-1.02	-0.68 ± 0.37	-0.93	-0.9	-0.83	-1.04	-0.83
BcellWH2_04291	-0.55	0.16	-1.01	-0.71	-1.16	-0.65 ± 0.52	-1.54	-0.72	-0.43	-0.38	-1.47	-0.91 ± 0.56	-1.2	0.04	-0.82	-1.31	0.24	-0.61 ± 0.71	-0.44	0.31	-0.95	-0.76	-1.11	-0.59 ± 0.56	-0.99	-0.73	-0.81	-0.84	-1.38	-0.95 ± 0.26	-0.7	-0.87	-0.76	-0.98	-0.55	-0.75	-0.76 ± 0.18	-0.64	-1.05	-0.76	0.35	-0.96	-0.8	-0.54 ± 0.6	-0.37	-0.75	0.19	-0.93	-0.55
BcellWH2_04293	-	-	-	-	-	-	-	-	-	-	-	-	-	-	-	-	-	-	-	-	-	-	-	-	-1.19	-0.26	-0.95	-0.89	0.17	-0.62 ± 0.56	-0.95	-1.02	-0.62	-0.4	-1.1	-0.7	-0.7 ± 0.29	-0.95	-0.48	-0.57	-0.35	-0.18	0.07	-0.26 ± 0.27	-0.6	-0.92	-1.09	0	-1.15
BcellWH2_04294	-0.13	-0.07	-0.71	-1.18	-0.86	-0.59 ± 0.48	-0.22	-1.31	-0.73	-0.98	-0.51	-0.75 ± 0.42	-0.66	-0.79	-0.43	-0.32	-0.49	-0.54 ± 0.19	-1.04	-0.24	-1.14	-0.13	-0.68	-0.65 ± 0.46	-1.58	-0.89	0.21	-0.88	-1.18	-0.87 ± 0.66	-0.67	-0.66	-1.07	-0.91	-0.2	-0.99	-0.79 ± 0.4	-0.99	-1.28	-1	0.62	-0.54	-0.73	-0.41 ± 0.72	-0.99	-1.33	-0.7	-1.09	-0.66
BcellWH2_04295	-1.08	-0.37	-0.94	-1.03	0.42	-0.6 ± 0.64	-1.18	-0.78	-1.33	-0.67	-0.29	-0.85 ± 0.41	-0.71	-1.1	-0.81	-0.89	-0.66	-0.83 ± 0.17	-1.05	-0.97	-0.89	-1.03	-0.95	-0.98 ± 0.06	-1.1	-1	-0.96	-0.7	-0.74	-0.9 ± 0.17	-0.62	-0.86	-1.63	-0.65	-0.19	-0.46	-0.73 ± 0.63	-0.98	-1.08	-0.79	-0.5	-0.81	-1.12	-0.81 ± 0.25	-0.62	-0.66	-0.72	-0.82	-0.89
BcellWH2_04296	1.99	2.62	2.6	2.74	2.62	2.51 ± 0.3	2.18	2.13	2.11	2.07	1.92	2.08 ± 0.1	2.25	2.32	2.46	2.17	2.22	2.28 ± 0.11	1.85	2.29	2.33	2.62	2.28	2.27 ± 0.27	2.41	2.35	2.35	2.37	2.37	2.37 ± 0.03	1.89	1.7	1.66	1.79	1.83	1.9	1.79 ± 0.1	2.23	2.12	2.1	2.03	2.07	2.14	2.08 ± 0.05	2.19	2.37	2.34	2.15	2.08
BcellWH2_04297	1.26	2.03	2.16	2.15	2.06	1.93 ± 0.38	1.35	1.18	1.56	1.3	1.52	1.38 ± 0.16	1.56	1.34	1.81	1.64	1.79	1.63 ± 0.19	1.55	2	1.89	1.97	1.3	1.74 ± 0.31	2.41	2.15	2.14	1.87	2.15	2.14 ± 0.19	1.47	1.54	1.45	1.46	1.75	1.9	1.64 ± 0.22	2.04	1.84	2.09	1.58	1.75	1.88	1.83 ± 0.21	2.17	2.13	2	2.07	1.87
BcellWH2_04298	2.4	2.15	2.3	2.17	2.15	2.24 ± 0.11	1.61	1.82	1.74	1.55	1.57	1.66 ± 0.12	1.77	1.85	1.93	1.88	2	1.88 ± 0.09	1.49	1.94	2.01	1.93	1.8	1.83 ± 0.2	2.31	2.33	2.34	2.31	2.39	2.34 ± 0.03	1.85	1.55	1.7	2	1.7	1.76	1.79 ± 0.14	1.99	2.38	2.21	2.11	1.99	2.13	2.11 ± 0.09	2.33	2.24	2.11	2.14	2.21
BcellWH2_04299	2.03	2.12	2.25	2.36	2.26	2.2 ± 0.13	1.68	1.79	1.65	1.5	1.62	1.65 ± 0.1	1.78	1.88	2.09	1.87	2.22	1.97 ± 0.18	1.81	2.06	2.25	2.18	2.21	2.1 ± 0.18	2.68	2.19	2.42	2.14	2.54	2.39 ± 0.23	1.84	1.86	1.83	1.91	1.9	2.09	1.93 ± 0.11	2.23	2.29	2.2	2.16	2.18	2.16	2.18 ± 0.02	2.37	2.37	2.38	2.35	2.34
BcellWH2_04300	1.71	1.68	1.56	1.82	1.54	1.66 ± 0.11	1.22	1.11	0.99	1.11	1.19	1.12 ± 0.09	1.03	1.4	1.18	1.5	1.14	1.25 ± 0.2	-0.51	1.83	1.53	1.71	1.33	1.18 ± 0.96	1.87	1.41	1.53	1.66	1.74	1.64 ± 0.18	1.13	0.91	1.34	1.28	0.98	1.38	1.25 ± 0.18	1.73	1.65	1.59	1.67	1.56	1.66	1.62 ± 0.05	1.83	1.8	1.67	1.53	1.84
BcellWH2_04301	2.08	2.34	1.74	1.92	2.07	2.03 ± 0.22	1.25	1.54	2.11	2.16	1.19	1.65 ± 0.47	1.25	1.46	2.39	2.14	2.56	1.96 ± 0.58	1.37	1.89	1.8	2.11	1.84	1.8 ± 0.27	1.54	1.57	1.67	1.38	1.82	1.6 ± 0.16	0.97	1.28	0.98	1.38	1.38	0.92	1.16 ± 0.25	1.58	1.04	1.66	1.24	1.16	1.84	1.47 ± 0.33	2.11	1.83	1.82	1.29	1.41
BcellWH2_04302	1.08	0.8	1.08	0.77	1.04	0.95 ± 0.16	0.38	0.13	0.13	0	0.23	0.17 ± 0.14	0.07	0.41	0.56	0.83	0.73	0.52 ± 0.3	-0.37	0.78	1.02	0.83	0.49	0.55 ± 0.55	1.36	0.68	1.25	1.55	1.25	1.22 ± 0.32	0.53	0.38	0.41	0.11	0.52	0.69	0.43 ± 0.24	0.68	0.87	1.29	0.58	0.86	0.74	0.87 ± 0.3	1.04	0.87	1.13	0.8	1.06
BcellWH2_04304	-0.49	0.55	0.6	0.35	0.17	0.24 ± 0.44	-2.1	-1.44	-0.56	-0.82	-0.76	-1.14 ± 0.63	-1	-0.93	0.02	-0.15	-0.05	-0.42 ± 0.5	-0.11	-1.09	0.43	0.47	-0.77	-0.21 ± 0.7	-0.78	-0.91	-1.05	-1.02	-1.05	-0.96 ± 0.12	-0.3	-1.43	-1.11	-0.93	-0.51	-0.85	-0.85 ± 0.25	-0.47	-0.77	-0.99	-1.11	-0.43	-0.78	-0.83 ± 0.3	-1.01	-0.67	-0.69	-0.26	-0.42
BcellWH2_04305	-0.04	0.21	0.76	1.22	1.1	0.65 ± 0.55	-0.82	-0.02	-1	-1.32	-1.01	-0.84 ± 0.49	-1.1	-0.44	-1.42	0.13	-0.78	-0.72 ± 0.6	-0.34	0.91	0.28	0.24	0.45	0.31 ± 0.45	1.22	1.67	1	0.97	0.58	1.09 ± 0.4	0.21	0.2	-0.12	0.32	-0.52	0.44	0.03 ± 0.44	1.03	0.77	0.21	0.5	0.36	0.76	0.46 ± 0.23	0.69	0.8	0.54	0.76	0.55
BcellWH2_04306	-0.16	-1.2	-0.72	0.04	0.28	-0.35 ± 0.6	0.09	-0.93	-0.92	-1.53	-1.72	-1 ± 0.71	-1.49	-0.53	-0.69	0.07	0.08	-0.51 ± 0.65	-0.55	-0.64	-1.22	-0.66	-0.5	-0.72 ± 0.29	0.81	1.64	0.74	-0.56	-1.21	0.28 ± 1.15	-0.57	-0.9	-2.15	-1.78	-1.53	-1.04	-1.62 ± 0.46	-0.72	0.41	-0.63	0.02	-0.95	-1.06	-0.66 ± 0.48	-0.55	-0.26	0.21	-1.22	0.34
BcellWH2_04316	1.46	1.33	1.18	1.24	1.57	1.36 ± 0.16	0.78	1	1.49	0.6	0.68	0.91 ± 0.36	0.97	1.04	1.08	1.08	0.84	1 ± 0.1	1.43	1.07	1.04	1.21	1	1.15 ± 0.18	1.17	0.96	1.11	1.64	1.22	1.22 ± 0.26	1.15	1.18	0.91	1.16	1.19	1.21	1.12 ± 0.14	1.17	1.4	1.43	1.29	1.45	1.41	1.4 ± 0.07	1.59	1.65	1.52	1.45	1.16
BcellWH2_04317	-	-	-	-	-	-	-	-	-	-	-	-	-	-	-	-	-	-	-	-	-	-	-	-	-0.68	-0.78	-0.72	-0.84	-1.12	-0.83 ± 0.17	-0.44	-1.27	-0.5	-0.57	0.22	-0.96	-0.45 ± 0.49	-1.1	-0.23	-0.74	-0.68	-0.4	-0.84	-0.66 ± 0.19	-0.59	-0.84	-0.97	-1.08	-0.55
BcellWH2_04318	1.91	1.89	1.97	2.03	1.89	1.94 ± 0.06	1.54	1.5	1.5	1.54	1.45	1.51 ± 0.04	1.76	1.82	1.96	1.89	1.88	1.86 ± 0.07	1.79	1.97	2.17	1.89	2.13	1.99 ± 0.16	2.03	1.36	1.98	1.43	1.93	1.75 ± 0.33	1.45	1.83	1.39	1.62	1.61	1.7	1.58 ± 0.13	2	1.85	1.89	1.87	1.84	1.94	1.88 ± 0.04	1.92	1.9	1.89	1.82	1.99
BcellWH2_04319	1.66	1.58	1.35	1.51	1.3	1.48 ± 0.15	0.96	0.82	0.89	0.88	0.81	0.87 ± 0.06	0.79	0.9	1.2	1.26	1.33	1.1 ± 0.24	0.88	1.36	0.67	1.23	0.88	1.01 ± 0.28	1.66	1.51	1.3	1.69	1.52	1.54 ± 0.16	1.27	1.3	1.43	1.31	1.02	1.32	1.27 ± 0.18	1.55	1.68	1.55	1.55	1.45	1.67	1.56 ± 0.09	1.57	1.64	1.41	1.64	1.71
BcellWH2_04321	-	-	-	-	-	-	-	-	-	-	-	-	-	-	-	-	-	-	-	-	-	-	-	-	-1.22	-1.14	-0.92	-1.06	-1	-1.07 ± 0.12	-0.77	0.02	-1.05	-1.27	-0.85	-0.57	-0.93 ± 0.3	-0.99	-0.78	-1.16	-0.82	-0.71	-0.77	-0.86 ± 0.2	-1.07	-1.1	-0.61	-0.76	-0.96
BcellWH2_04322	1.27	0.27	0.75	0.15	0.6	0.61 ± 0.44	-1.79	0.26	-0.56	-1.82	-2.25	-1.23 ± 1.04	0.85	-0.59	0.48	-1.79	0.11	-0.19 ± 1.04	-0.12	0.5	1.2	0.1	0.61	0.46 ± 0.51	-0.52	-0.01	-0.83	-0.55	-0.78	-0.54 ± 0.32	-1.32	0.17	-0.66	-0.82	-1.07	-0.92	-0.87 ± 0.17	-0.32	0.16	-0.81	0.16	-0.06	0.13	-0.15 ± 0.45	-0.78	0.29	-0.07	-0.9	0.73
BcellWH2_04323	1.09	1.37	0.64	0.77	0.57	0.89 ± 0.34	1.37	0.82	1.23	1.34	1.32	1.21 ± 0.23	0.78	1.5	1.14	1.38	1.1	1.18 ± 0.28	-0.99	1.41	1.47	1.47	1.05	0.88 ± 1.06	1.51	0.46	1.37	1.23	0.52	1.02 ± 0.49	1.6	1.66	1.56	1.48	1.73	1.57	1.59 ± 0.1	1.14	1.67	1.72	1.56	1.43	1.69	1.6 ± 0.13	1.75	1.58	1.48	1.56	1.83
BcellWH2_04324	1.42	1.48	1.67	1.52	1.49	1.52 ± 0.09	1.82	1.56	1.71	1.75	1.56	1.68 ± 0.12	1.38	1.49	1.11	1.66	1.7	1.47 ± 0.24	1.2	1.7	1.46	1.66	1.59	1.52 ± 0.2	1.97	1.87	1.85	1.96	1.68	1.87 ± 0.12	1.83	1.86	1.74	1.72	1.84	1.82	1.78 ± 0.06	1.88	1.68	1.86	1.66	1.84	1.81	1.79 ± 0.09	1.94	1.98	1.83	1.7	1.97
BcellWH2_04325	1.41	1.03	0.86	0.87	0.84	1 ± 0.24	1.38	1.26	1.32	1.29	1.27	1.3 ± 0.05	1.05	1.2	0.93	1.11	0.89	1.04 ± 0.13	1.28	1.24	1.38	1.57	1.1	1.31 ± 0.17	1.26	0.96	1.29	0.57	0.95	1.01 ± 0.29	1.42	1.45	1.32	1.24	1.45	1.48	1.37 ± 0.11	0.92	1.3	1.17	1.3	1.34	1.21	1.26 ± 0.08	1.36	1.42	1.28	1.18	1.34
BcellWH2_04326	1.24	1.48	1.45	1.63	1.39	1.44 ± 0.14	2.06	1.78	1.61	1.82	1.8	1.81 ± 0.16	1.23	1.27	1.53	1.27	1.55	1.37 ± 0.15	1.07	1.55	1.39	1.87	1.55	1.49 ± 0.29	1.75	1.6	1.66	1.28	1.48	1.55 ± 0.18	1.66	2.03	1.7	1.85	1.86	1.86	1.82 ± 0.08	1.42	1.87	1.53	1.61	1.55	1.43	1.53 ± 0.07	1.89	1.81	1.81	1.56	1.74
BcellWH2_04331	-0.29	-1.32	-1.18	0.17	0.26	-0.47 ± 0.74	-0.39	0.18	-0.07	0.42	0.3	0.09 ± 0.32	-0.67	0.48	-0.81	-1.67	-1.08	-0.75 ± 0.78	-0.42	-1.05	0.74	0.18	0.45	-0.02 ± 0.72	-0.87	0.8	0.69	0.57	0.04	0.24 ± 0.69	0.9	0.47	0.73	0.63	0.33	0.85	0.64 ± 0.22	-0.94	0.21	-0.78	0.93	0.4	0.86	0.35 ± 0.79	0.51	0.4	0.66	0.81	0.66
BcellWH2_04335	-0.73	-0.02	-0.54	-0.93	-0.72	-0.59 ± 0.35	-1.04	0.39	-1.04	-1.01	-1.1	-0.76 ± 0.64	-1.46	-0.95	-1.44	-1.18	-0.82	-1.17 ± 0.29	-1.15	-1.17	-0.69	-1.01	-0.87	-0.98 ± 0.2	-0.46	-0.32	1.02	-0.13	-1.49	-0.28 ± 0.9	-0.56	-1.08	-0.53	-0.82	-0.43	-1.12	-0.73 ± 0.31	-0.31	0.22	-0.06	0.46	0.18	0.81	0.35 ± 0.37	-0.2	-0.34	-1.02	-0.43	-0.98
BcellWH2_04340	-	-	-	-	-	-	-	-	-	-	-	-	-	-	-	-	-	-	-	-	-	-	-	-	-0.38	-0.75	-0.17	-0.59	-1.02	-0.58 ± 0.33	-0.89	0.25	-0.44	-0.57	-0.38	-1.62	-0.75 ± 0.58	0.61	-1.45	-0.07	0.17	-0.16	-0.19	-0.06 ± 0.16	-0.53	0.06	-0.11	-0.35	0.45
BcellWH2_04344	-1.06	-0.87	-0.56	-1.12	0.54	-0.62 ± 0.68	-1.37	-1.28	-0.76	-1.14	0.15	-0.88 ± 0.62	-1.15	-0.97	-1.37	-0.4	-1.03	-0.98 ± 0.36	-1.32	-0.44	-1.13	-0.78	-0.83	-0.9 ± 0.34	-	-	-	-	-	-	-	-	-	-	-	-	-	-	-	-	-	-	-	-	-	-	-	-	-
BcellWH2_04345	-0.42	-0.83	0.18	-0.14	-1.32	-0.51 ± 0.59	0.22	-0.02	-0.2	0.35	0.35	0.14 ± 0.24	0.86	0.35	0.66	0.12	0.39	0.48 ± 0.29	1.57	0.24	0.62	-0.45	0.13	0.42 ± 0.75	0.02	-0.01	0.28	-0.17	0.17	0.06 ± 0.18	0.4	0.44	-0.16	1.57	-0.16	-1.52	-0.07 ± 1.27	-0.53	2.12	-1.06	0.26	0.06	0	-0.19 ± 0.59	0.16	-1.21	0.09	-0.01	-1.54
BcellWH2_04349	-	-	-	-	-	-	-	-	-	-	-	-	-	-	-	-	-	-	-	-	-	-	-	-	-0.47	-0.74	-1.31	-0.56	-0.71	-0.76 ± 0.33	-1.44	-0.76	-0.54	-0.16	-1.34	-1.26	-0.82 ± 0.57	-0.25	-1.11	-0.92	0.15	0.37	0.36	-0.01 ± 0.62	-0.79	-1.02	-0.74	0.4	0.29
BcellWH2_04351	-0.32	0.3	-1.02	-0.81	-0.93	-0.56 ± 0.55	-0.46	-1.21	0.2	-1.32	0.3	-0.5 ± 0.76	-0.91	-0.07	-0.76	-1.09	-0.69	-0.7 ± 0.39	-0.33	-1.04	-0.7	-0.72	-1.48	-0.86 ± 0.43	0	-1.03	-0.56	-0.7	-0.28	-0.51 ± 0.39	-1.24	-0.95	-1.1	-0.93	-1.35	-0.74	-1.03 ± 0.26	-0.86	-0.04	-0.93	-0.07	0.05	-1.02	-0.49 ± 0.56	-1.41	0.03	-1.24	-0.81	-0.6
BcellWH2_04353	-1.1	-1.35	-0.91	-0.79	-0.86	-1 ± 0.22	-0.3	-1.21	-0.79	-0.82	-0.32	-0.69 ± 0.38	-0.63	-0.45	-0.61	-0.7	-1.05	-0.69 ± 0.22	-0.81	-1.06	-0.99	-0.13	-0.69	-0.73 ± 0.37	0.23	-0.53	-0.64	-0.32	-0.2	-0.29 ± 0.34	-0.66	-0.82	-0.2	-0.42	-1.05	0.67	-0.25 ± 0.71	-1.08	-0.63	-0.44	-0.37	-0.86	-0.59	-0.56 ± 0.22	-0.73	-0.57	-0.81	-1.12	-0.7
BcellWH2_04356	-1.13	-0.98	-0.57	-0.56	-0.52	-0.76 ± 0.28	-1.13	-0.8	-1	-0.9	-0.96	-0.96 ± 0.12	-0.93	-0.93	-0.85	-0.9	-1.12	-0.95 ± 0.1	-1.11	-0.66	-0.55	-0.92	-1.53	-0.95 ± 0.39	-1.08	-0.76	-0.53	-1.28	-0.98	-0.93 ± 0.29	-0.8	-0.8	-0.34	-1.28	-0.87	-0.54	-0.76 ± 0.41	-0.68	-0.79	-0.74	-0.86	-0.72	-0.76	-0.77 ± 0.06	-1	-0.36	-0.79	-0.75	-0.68
BcellWH2_04357	-0.41	-0.97	-0.85	0	0.35	-0.38 ± 0.56	-0.43	0.41	0.12	-0.49	-0.68	-0.21 ± 0.46	0.35	0.06	0.24	-1	-0.93	-0.26 ± 0.66	-0.82	-1.04	-0.43	-0.98	-1	-0.85 ± 0.25	-0.5	0.88	0.65	-0.49	-1.45	-0.18 ± 0.95	0.07	0.31	0.19	-0.02	-0.2	-1.09	-0.28 ± 0.56	-0.49	-0.09	-0.76	0.27	-0.1	-1.2	-0.45 ± 0.66	-1.02	0.18	-0.07	-1.41	0.17
BcellWH2_04359	1.72	1.96	2.16	2.21	2	2.01 ± 0.2	1.91	2.12	2.08	1.97	1.96	2.01 ± 0.09	2.1	1.96	2.2	2.18	2.35	2.16 ± 0.14	2.14	1.95	2.02	1.97	1.98	2.01 ± 0.07	2.39	2.24	2.5	2.58	2.38	2.42 ± 0.13	2.52	2.37	2.3	2.37	2.35	2.33	2.34 ± 0.03	2.39	2.32	2.46	2.19	2.61	2.7	2.49 ± 0.22	2.44	2.38	2.2	2.38	2.29
BcellWH2_04361	-0.42	0.56	-1.36	0.88	0.9	0.11 ± 0.98	0.56	0.49	0.45	-0.15	0.56	0.38 ± 0.3	0.25	-0.12	0.22	0.66	-1.07	-0.01 ± 0.65	-0.69	-0.97	-0.92	-1.12	0.21	-0.7 ± 0.53	1.12	0.41	-1.47	-0.52	0.26	-0.04 ± 0.99	-1.79	-1.37	0.42	0.1	0.65	0.75	0.48 ± 0.29	-0.14	-1.35	1.21	0.5	-1.49	0.19	0.1 ± 1.14	-1.06	-1.28	-1.76	0.69	0.7
BcellWH2_04364	0.96	0.78	1.08	1.13	0.51	0.89 ± 0.25	0.77	0.81	0.8	0.73	0.79	0.78 ± 0.03	0.28	0.17	0.22	0.83	0.53	0.4 ± 0.28	0.75	0.73	0.74	0.68	0.82	0.74 ± 0.05	0.58	0.8	0.8	1.05	0.77	0.8 ± 0.17	0.97	1.17	1.04	0.74	0.86	1	0.91 ± 0.14	0.26	0.41	0.77	0.95	1.27	1.23	1.05 ± 0.24	0.69	0.73	0.81	0.96	0.86
BcellWH2_04365	-0.62	-0.57	-1.01	-0.75	-1.02	-0.8 ± 0.21	-0.04	-0.59	-1.48	-1.38	-0.65	-0.82 ± 0.6	-0.86	-1.19	-1.11	-0.78	-0.25	-0.84 ± 0.37	-0.85	-0.62	-0.89	-0.73	-1.16	-0.85 ± 0.2	-0.91	-0.57	-0.67	-0.71	-0.75	-0.72 ± 0.12	-1.53	0.5	0.2	-1.34	0.2	-0.99	-0.48 ± 0.8	-0.89	-1.1	-1.18	-1.23	-0.61	-0.68	-0.93 ± 0.32	-0.21	-0.86	-1.03	-1.05	-0.61
BcellWH2_04369	-0.35	0.83	0.63	-1.01	-1.47	-0.27 ± 1	0.43	0.31	0.62	0.47	0.22	0.41 ± 0.15	0.05	-1.11	0.54	0.58	-1.22	-0.23 ± 0.88	0.26	-1.1	-0.7	-1.08	-1.07	-0.74 ± 0.58	0.83	1.21	0.82	-0.83	1.11	0.63 ± 0.83	1.75	1.23	0.62	1.23	1.22	1.26	1.08 ± 0.31	1	0.32	0.95	1.08	0.87	1.66	1.14 ± 0.36	1.18	0.94	0.89	0.72	0.67
BcellWH2_04371	-	-	-	-	-	-	-	-	-	-	-	-	-	-	-	-	-	-	-	-	-	-	-	-	-0.25	0.13	-1.02	-0.35	-1.11	-0.52 ± 0.53	-0.27	-1.52	0.19	-0.58	0.33	0.35	0.07 ± 0.44	-0.94	-1.35	-0.82	-0.34	-0.35	-0.5	-0.5 ± 0.22	0.14	-0.15	-1.1	-0.43	-1.1
BcellWH2_04372	-	-	-	-	-	-	-	-	-	-	-	-	-	-	-	-	-	-	-	-	-	-	-	-	-0.46	-0.62	-0.7	-1.09	-1.19	-0.81 ± 0.31	-1.16	0.36	-1.62	0.21	-0.79	-0.69	-0.72 ± 0.75	-0.28	-0.79	-0.67	-0.92	0.54	-0.9	-0.49 ± 0.69	-0.37	-0.55	-1.23	-1.43	-0.86
BcellWH2_04373	-0.86	-0.59	-0.99	-0.4	-1.26	-0.82 ± 0.34	-0.06	-0.23	0.2	-0.24	-0.5	-0.17 ± 0.26	-0.92	-0.86	-0.48	-0.86	-0.47	-0.72 ± 0.22	-0.87	-0.79	-0.56	-1.19	-1.12	-0.91 ± 0.26	-0.66	-0.64	-1.21	-0.78	-0.83	-0.82 ± 0.23	-1.13	0.31	-0.09	0.23	-0.76	-1.39	-0.5 ± 0.72	-0.67	-0.47	-0.81	-0.06	-0.03	-0.57	-0.37 ± 0.39	-0.37	-0.81	-1.08	-1.29	-0.93
BcellWH2_04374	-0.28	0.02	0.41	-0.07	-0.35	-0.05 ± 0.3	0.23	0.33	0.33	0.53	0.4	0.36 ± 0.11	0.71	0.3	0.84	-0.25	0.63	0.44 ± 0.44	1.08	-0.18	0.75	-0.63	0	0.2 ± 0.7	0.32	-0.02	0.72	-0.64	-0.06	0.07 ± 0.5	0.22	0.54	0.24	0.48	-0.22	0.65	0.29 ± 0.38	0.64	-0.33	0.21	0.53	-0.58	-1.19	-0.26 ± 0.78	0.3	0.33	0.49	0.15	0.25
BcellWH2_04375	0.37	-1.38	-1.24	-1.3	1.14	-0.48 ± 1.16	-0.18	0.24	0.7	0.01	-0.24	0.11 ± 0.38	-0.52	-0.73	-0.96	-1.84	-0.98	-1.01 ± 0.5	-0.66	-0.48	-0.44	-0.73	-0.84	-0.63 ± 0.17	-1.18	-0.68	-0.96	-0.9	-0.83	-0.91 ± 0.18	-0.97	-0.67	-1.23	-0.67	0.96	-1.11	-0.51 ± 1.01	-1	-1	-1.04	-0.67	-1.02	-0.94	-0.92 ± 0.17	-0.98	-1.08	-0.63	-0.95	-0.82
BcellWH2_04376	-0.52	0.76	0.42	0.92	0.82	0.48 ± 0.59	0.32	0.3	0.5	0.37	0.26	0.35 ± 0.09	-0.21	0.66	0.65	0.61	0.44	0.43 ± 0.37	-0.63	0.53	1.14	0.7	0.5	0.45 ± 0.65	-	-	-	-	-	-	-	-	-	-	-	-	-	-	-	-	-	-	-	-	-	-	-	-	-
BcellWH2_04378	-	-	-	-	-	-	-	-	-	-	-	-	-	-	-	-	-	-	-	-	-	-	-	-	-0.65	-0.91	-0.6	-0.63	-0.75	-0.71 ± 0.12	-0.76	-1.13	0.02	-0.37	-1.22	-1.31	-0.72 ± 0.65	-0.72	-0.11	-0.68	-0.17	-0.39	-1.07	-0.58 ± 0.39	-1.14	-0.92	-0.95	-0.94	-0.19
BcellWH2_04381	1.57	1.1	0.89	0.95	0.48	1 ± 0.39	0.93	1	0.89	0.98	0.89	0.94 ± 0.05	0.77	0.69	0.65	0.78	0.95	0.77 ± 0.12	1.24	0.99	0.92	0.9	0.93	1 ± 0.14	-0.23	-0.57	0.15	0.8	0.71	0.17 ± 0.59	0.73	1.1	1.01	0.71	0.9	0.96	0.9 ± 0.13	1.26	0.69	0.55	0.88	0.03	0.89	0.59 ± 0.41	0.15	0.19	0.58	0.02	0.83
BcellWH2_04384	-0.51	0.33	-0.08	-0.48	-0.85	-0.32 ± 0.46	-0.35	-1.27	0	-0.37	-1.16	-0.63 ± 0.55	-0.93	-1.21	-0.09	-0.38	-0.8	-0.68 ± 0.44	-0.98	-0.84	-1.17	-0.57	-0.52	-0.82 ± 0.28	0.55	0.66	0.32	0.64	0.56	0.55 ± 0.14	0.14	-0.58	-1.24	-0.3	-0.06	0.01	-0.4 ± 0.58	-0.32	0.04	-0.93	0.12	-1.52	-1.16	-0.87 ± 0.71	-1.43	0.17	0.54	0.35	-1.03
BcellWH2_04385	-0.27	0.4	0.58	0.61	0.51	0.37 ± 0.36	-0.05	0.25	0.26	0.49	0.02	0.19 ± 0.22	0.38	0.23	0.52	-1.37	0.16	-0.01 ± 0.77	1.34	0.53	-1.03	0.85	0.56	0.45 ± 0.89	1.32	0.99	1.38	1.5	1.34	1.31 ± 0.19	0.92	0.85	0.99	0.91	0.76	0.82	0.87 ± 0.1	1.34	1.27	1.04	1.19	1.23	1.15	1.15 ± 0.08	1.15	1.32	0.85	1.04	1.31
BcellWH2_04386	-	-	-	-	-	-	-	-	-	-	-	-	-	-	-	-	-	-	-	-	-	-	-	-	-0.14	-0.93	-1.11	1.28	0.29	-0.12 ± 0.97	-0.25	-0.21	-0.02	-0.42	-1.8	-0.47	-0.67 ± 0.77	-0.68	0.68	0	0.27	-0.01	0.03	0.07 ± 0.13	-1.24	0.12	-0.31	0.04	0.33
BcellWH2_04387	-0.24	-1.27	0.33	-0.83	-0.88	-0.58 ± 0.63	-1.01	-0.64	-1.25	-0.9	-1.51	-1.06 ± 0.34	-1.26	-0.95	-0.87	-0.79	-0.86	-0.95 ± 0.19	-1.19	-0.65	-0.83	-0.62	-1.03	-0.86 ± 0.24	-	-	-	-	-	-	-	-	-	-	-	-	-	-	-	-	-	-	-	-	-	-	-	-	-
BcellWH2_04389	-0.84	-0.02	-0.76	-0.89	-0.94	-0.69 ± 0.38	-0.17	-1.06	-0.12	-0.13	-1.29	-0.55 ± 0.57	-0.84	-1.07	-0.65	-1.04	-0.88	-0.9 ± 0.17	-1.28	-0.6	-0.84	-0.56	-0.8	-0.82 ± 0.29	0	-1.1	-0.16	-0.67	-1.16	-0.62 ± 0.53	-0.06	-1.54	-0.86	-1.03	-0.16	-0.13	-0.54 ± 0.47	-0.96	0.26	-0.77	-1.19	-1	0.01	-0.74 ± 0.53	0.23	-0.53	-0.96	-1.08	0.02
BcellWH2_04390	1.92	2.24	2.2	2.28	2.19	2.17 ± 0.14	2.21	2.1	2.08	2.15	2.14	2.14 ± 0.05	2.36	2.06	2.13	2.3	2.09	2.19 ± 0.14	1.7	2.22	2.06	2.14	2.15	2.05 ± 0.2	2.06	2.37	2.34	2.29	2.59	2.33 ± 0.19	2.55	2.43	2.17	2.69	2.56	2.24	2.42 ± 0.25	2.38	2.4	2.68	2.31	2.57	2.54	2.53 ± 0.16	2.51	2.1	2.36	2.35	2.24
BcellWH2_04423	1.92	2.48	2.46	2.62	2.51	2.4 ± 0.28	2.12	2.41	2.2	2.3	2.39	2.28 ± 0.12	2.38	2.35	2.45	2.56	2.53	2.46 ± 0.09	2.1	2.4	2.58	2.69	2.43	2.44 ± 0.22	2.76	2.57	2.81	2.57	2.67	2.67 ± 0.11	2.67	2.39	2.43	2.48	2.44	2.54	2.47 ± 0.05	2.66	2.64	2.69	2.56	2.61	2.75	2.65 ± 0.08	2.59	2.55	2.53	2.55	2.47
BcellWH2_04446	1	-0.2	0.01	0.18	-0.11	0.18 ± 0.48	-0.08	0.08	0.25	-0.14	0.04	0.03 ± 0.15	0.29	0.14	-0.03	-0.03	-0.42	-0.01 ± 0.27	1.39	-0.27	-1.09	0.17	-1.29	-0.22 ± 1.08	0.36	0.57	0.9	1.39	1.35	0.91 ± 0.46	0.01	0.49	0.91	0.86	0.75	0.74	0.81 ± 0.09	-0.62	1.11	0.64	1.12	1.14	1.13	1.01 ± 0.25	1	0.78	0.63	0.99	1.22
BcellWH2_04447	-0.52	-1.59	-0.69	-0.05	0.18	-0.53 ± 0.68	-0.29	-1.71	-1.44	0.04	-0.54	-0.79 ± 0.75	0.22	-0.92	-0.76	-0.17	-0.8	-0.49 ± 0.49	0.56	0.17	-0.41	0.18	0.2	0.14 ± 0.35	-0.57	-0.77	1.05	1.44	0.23	0.28 ± 0.97	0.1	-0.33	-0.09	-0.94	-1.62	-0.09	-0.69 ± 0.74	-0.46	-0.1	-0.95	0.05	0.17	0.29	-0.11 ± 0.57	0.18	0.19	0.28	0.15	0.07
BcellWH2_04449	0.69	0.68	0.7	0.43	0.23	0.55 ± 0.21	0.18	0.61	0.1	0.27	0.44	0.32 ± 0.21	0.3	-0.14	0.21	-0.2	-1.15	-0.2 ± 0.57	-0.49	0.66	0.65	1.02	0.66	0.5 ± 0.57	0.86	0.88	0.87	1.15	0.6	0.87 ± 0.2	0.63	0.47	0.42	0.41	0.86	0.51	0.55 ± 0.21	0.83	0.58	0.07	0.66	0.48	0.5	0.43 ± 0.25	0.62	0.61	0.72	0.41	0.67
BcellWH2_04465	-0.39	0.55	-0.14	-0.15	-1.53	-0.33 ± 0.75	-1.78	-0.2	-1.54	-1.79	-2.16	-1.49 ± 0.76	0.72	0.62	0.25	0.61	0.42	0.52 ± 0.19	1.35	-0.62	-0.54	0.92	-0.32	0.16 ± 0.91	0.97	0.01	-0.09	0.1	0.35	0.27 ± 0.42	0.63	-0.95	0.5	0.51	0.38	-1.46	-0.02 ± 0.96	0.37	0.5	0.61	0.39	0.17	0.24	0.35 ± 0.19	0.65	0.94	0.35	0.75	0.46
BcellWH2_04466	1.66	1.87	1.88	2.01	2.01	1.89 ± 0.14	1.84	1.85	1.79	1.75	1.72	1.79 ± 0.06	1.89	1.74	1.88	1.57	1.92	1.8 ± 0.15	1.95	1.85	1.94	1.97	2.09	1.96 ± 0.08	1.98	2.18	1.96	1.95	1.93	2 ± 0.1	1.88	1.98	1.74	2	2.04	1.95	1.93 ± 0.13	1.68	1.96	1.95	1.96	1.95	1.85	1.93 ± 0.05	1.83	1.76	2.16	1.95	1.85
BcellWH2_04469	1.41	1.39	1.48	1.46	1.55	1.46 ± 0.06	1.61	1.47	1.48	1.49	1.51	1.51 ± 0.06	1.42	1.22	1.45	1.57	1.25	1.38 ± 0.15	1.79	1.59	1.41	0.82	1.31	1.38 ± 0.37	1.18	1.57	1.39	1.36	1.53	1.41 ± 0.16	1.43	1.56	1.26	1.69	1.7	1.58	1.56 ± 0.21	1.58	1.23	1.42	1.48	1.7	1.71	1.57 ± 0.15	1.31	1.37	1.54	1.52	1.47
BcellWH2_04471	-0.77	-0.07	0.07	0.23	0.06	-0.1 ± 0.39	-0.6	-0.49	-0.26	-1.56	-0.68	-0.72 ± 0.5	-0.67	-1.02	-0.59	-1.25	0.33	-0.64 ± 0.6	-0.51	-0.65	0.46	0.52	-0.85	-0.2 ± 0.65	-1	-0.78	-1.41	-0.32	-0.5	-0.8 ± 0.43	0.01	-1.14	-0.8	-0.24	-0.93	-1.25	-0.81 ± 0.42	-0.86	-0.86	-0.93	0.14	-1.2	-0.58	-0.64 ± 0.58	-0.74	-0.96	-0.72	-0.96	-0.7
BcellWH2_04472	-0.21	-0.02	-0.14	-0.17	-0.52	-0.21 ± 0.19	-0.3	-0.31	-0.92	-0.51	-0.37	-0.48 ± 0.26	0.87	0.17	-1.16	-0.79	-0.56	-0.29 ± 0.81	1.54	-0.01	-0.26	-0.82	-0.88	-0.09 ± 0.98	0.55	0.73	0.08	0.62	0.2	0.44 ± 0.28	0.08	-0.01	-0.27	-0.45	-0.06	0.28	-0.13 ± 0.31	0.07	0.49	1.15	0.09	0.09	0.04	0.34 ± 0.54	0.09	0.25	0.82	0.2	0.05
BcellWH2_04474	-	-	-	-	-	-	-	-	-	-	-	-	-	-	-	-	-	-	-	-	-	-	-	-	-1.01	-0.44	-0.63	-1	-0.24	-0.66 ± 0.34	-1.15	-0.8	-1.14	-0.95	-0.87	-0.89	-0.96 ± 0.13	-1.13	-0.71	-0.6	-0.43	-0.98	-0.44	-0.61 ± 0.26	-0.64	-0.58	-0.37	-0.53	-0.81
BcellWH2_04476	-0.56	-0.96	0.82	0.41	0.4	0.02 ± 0.75	-1.71	0.49	0.04	-0.33	-2.26	-0.75 ± 1.18	-0.58	0.49	0.79	-1.56	0.62	-0.05 ± 1	-0.94	-0.4	-0.75	-0.48	-0.43	-0.6 ± 0.23	-	-	-	-	-	-	-	-	-	-	-	-	-	-	-	-	-	-	-	-	-	-	-	-	-
BcellWH2_04477	-	-	-	-	-	-	-	-	-	-	-	-	-	-	-	-	-	-	-	-	-	-	-	-	-0.71	-1.12	-0.84	-0.85	-0.96	-0.9 ± 0.16	-0.13	-1.08	0.24	-0.07	-0.94	-0.83	-0.4 ± 0.57	-0.83	-1.05	-1.02	-1.39	0.45	-0.26	-0.55 ± 0.82	-0.33	-0.44	-0.66	-0.95	-0.87
BcellWH2_04480	-1.01	-1.17	-1.26	-0.97	-0.56	-0.99 ± 0.27	-1.44	-1.07	0.86	-1.32	-0.93	-0.78 ± 0.94	0.71	-0.74	-0.74	-1.18	-1.19	-0.63 ± 0.78	0.74	-0.78	-0.79	-1.2	-1.11	-0.63 ± 0.79	-0.74	-1.11	-0.94	-0.82	-1.09	-0.94 ± 0.17	-0.21	-1.13	-0.59	-0.78	-1.11	-0.84	-0.83 ± 0.22	-1.03	-1.06	-1.05	-1.16	-0.57	-1.06	-0.96 ± 0.26	-1.36	-0.98	-0.46	-0.77	-0.83
BcellWH2_04518	-1.27	-0.86	-1.09	-0.79	-0.84	-0.97 ± 0.2	-0.1	-1.7	-0.92	-0.68	-1.36	-0.95 ± 0.62	-0.59	-1.29	-1.07	-0.98	-1.17	-1.02 ± 0.27	-0.78	-0.93	-1.25	-0.02	-0.72	-0.74 ± 0.45	-0.65	-0.66	-0.43	-0.71	-0.56	-0.6 ± 0.11	-0.85	-1.17	-0.37	-0.38	-1.41	-1.02	-0.8 ± 0.51	-1.3	-1.12	-0.78	-0.04	-0.3	-0.5	-0.4 ± 0.31	-0.6	-0.77	-0.7	-0.94	-0.87
BcellWH2_04520	-	-	-	-	-	-	-	-	-	-	-	-	-	-	-	-	-	-	-	-	-	-	-	-	-0.68	-0.77	-0.78	-0.99	-0.99	-0.84 ± 0.14	-0.85	-0.78	0.21	-0.17	-0.73	-0.82	-0.38 ± 0.49	-1.27	-0.73	-0.74	-0.85	-1.06	-0.64	-0.82 ± 0.18	-1.1	-0.6	-0.79	-0.86	-0.88
BcellWH2_04546	-	-	-	-	-	-	-	-	-	-	-	-	-	-	-	-	-	-	-	-	-	-	-	-	1.44	1.36	1.67	1.58	1.57	1.52 ± 0.12	1.41	1.05	1.23	0.53	0.86	1.07	0.92 ± 0.3	1.47	1.29	1.22	1.03	1.23	1.01	1.12 ± 0.12	1.18	1.21	1.1	0.81	1.31
BcellWH2_04553	-	-	-	-	-	-	-	-	-	-	-	-	-	-	-	-	-	-	-	-	-	-	-	-	-0.79	-0.63	-0.07	-0.54	-1.13	-0.63 ± 0.39	-0.73	-0.41	-0.28	-0.99	-0.38	-1.2	-0.71 ± 0.45	-0.97	-0.82	-0.79	-1.65	-0.82	-0.19	-0.86 ± 0.6	0.17	0.23	-0.43	0	-0.77
BcellWH2_04557	0.31	0.13	-0.13	-0.19	-0.16	-0.01 ± 0.22	-1.45	-0.32	-1.38	-1.7	-1.45	-1.26 ± 0.54	-0.96	-0.07	-0.86	0.19	0.11	-0.32 ± 0.55	-0.26	0.34	-1.05	-0.96	-0.48	-0.48 ± 0.57	-0.9	-0.17	-0.75	0.21	-1.03	-0.53 ± 0.53	-1.28	-0.9	-0.17	-1.72	-0.01	-0.59	-0.62 ± 0.77	-0.22	-0.5	-1.14	-1.19	-1.02	-1.18	-1.13 ± 0.08	-0.99	-0.68	0.53	-1.08	-0.52
BcellWH2_04572	-0.74	-1.23	-0.74	-0.72	-1.15	-0.92 ± 0.25	-0.52	-1.24	0.13	-0.4	-0.25	-0.46 ± 0.5	0.95	0.76	0.9	-0.14	0.42	0.58 ± 0.45	-0.51	-0.58	-0.66	-1.03	-0.89	-0.73 ± 0.22	-0.76	-0.89	0.45	1.02	0.85	0.13 ± 0.9	0.7	-1.29	0.5	0.3	0.53	0.29	0.4 ± 0.13	-0.84	0.59	0.76	0.55	0.64	0.6	0.64 ± 0.09	0.48	0.8	0.59	1.11	0.99
BcellWH2_04582	-	-	-	-	-	-	-	-	-	-	-	-	-	-	-	-	-	-	-	-	-	-	-	-	-1.51	-1.04	-1.41	-0.5	-0.62	-1.02 ± 0.45	-0.62	-0.74	-0.3	-1.22	-0.85	-0.69	-0.77 ± 0.38	-1.28	-0.67	-0.78	-0.42	-1.05	-0.76	-0.75 ± 0.26	-1.02	-1.28	-0.55	-1.07	-0.54
BcellWH2_04600	-0.87	0.39	-0.89	-0.15	-0.24	-0.35 ± 0.54	-0.76	-0.9	-0.82	-1.09	-0.61	-0.84 ± 0.17	-0.94	-1.09	-1.08	0.26	-1.54	-0.88 ± 0.67	-0.78	-1.13	-1.1	-1.12	-0.84	-0.99 ± 0.17	-0.49	-0.67	-0.46	-0.42	-1.27	-0.66 ± 0.35	-0.1	0.7	-0.69	-0.51	-1.26	-0.98	-0.86 ± 0.33	-0.82	0.15	-0.58	0.2	0.2	0.47	0.07 ± 0.45	-0.85	-0.66	-0.93	0.13	0.47
BcellWH2_04607	1.24	0.61	0.55	0.4	0.73	0.71 ± 0.32	0.05	0.54	-0.01	-1.94	-0.09	-0.29 ± 0.95	0.33	-0.83	0.64	-1.8	0.22	-0.29 ± 1.01	-0.57	-0.96	-0.41	-1.13	-1.01	-0.82 ± 0.31	0.8	0.61	0.13	-0.18	0.44	0.36 ± 0.39	0.19	-0.01	-2.03	-0.01	0.09	0.34	-0.4 ± 1.1	-0.37	-1.17	-0.06	-1.66	0.07	0.35	-0.33 ± 0.91	0.3	-0.98	-1.37	0.64	-1.18
BcellWH2_04609	-0.55	-0.13	-0.37	-0.55	-1.29	-0.58 ± 0.44	-1.18	-0.89	-0.97	-0.81	-1.07	-0.98 ± 0.15	-0.26	-0.84	-0.51	-0.92	-0.57	-0.62 ± 0.27	-0.66	-0.78	-0.7	-0.54	-0.84	-0.7 ± 0.12	-	-	-	-	-	-	-	-	-	-	-	-	-	-	-	-	-	-	-	-	-	-	-	-	-
BcellWH2_04616	-0.07	0.1	-1.04	-0.71	-0.09	-0.36 ± 0.49	-0.3	0.03	-0.05	-0.17	-0.45	-0.19 ± 0.19	-0.79	-0.08	-1.34	-0.86	-0.91	-0.8 ± 0.45	-0.83	-0.88	-0.69	-0.58	-1.49	-0.89 ± 0.35	-0.62	-0.43	-0.05	-0.41	-0.59	-0.42 ± 0.22	-0.88	-0.1	-0.75	-1.33	-0.94	-0.75	-0.94 ± 0.27	-0.67	-0.87	-0.25	-1.04	-0.8	-0.52	-0.65 ± 0.34	-0.87	-0.92	-0.26	-0.02	-1
BcellWH2_04628	0.6	1.1	0.89	1.17	0.67	0.89 ± 0.25	1.12	1.17	0.9	0.71	1.02	0.99 ± 0.19	0.91	0.84	0.68	0.76	0.78	0.79 ± 0.09	1.39	0.34	1.2	0.92	1.22	1.01 ± 0.41	1.51	1.45	1.25	-0.44	-0.19	0.71 ± 0.95	-0.07	0.83	0.3	-0.03	0.88	-1.1	0.01 ± 0.83	1.81	0.27	1.27	-1.36	0.03	0.06	0 ± 1.07	0.12	1.34	-1.37	-0.49	-0.15
BcellWH2_04632	-0.42	0.55	-1.06	0.66	0.1	-0.04 ± 0.71	0	-0.22	-1.96	0.38	-0.68	-0.5 ± 0.9	-1.04	-1.2	0.55	-1.46	-0.97	-0.83 ± 0.79	2.05	-0.9	-0.73	0.66	0.21	0.26 ± 1.19	-0.72	-0.74	0.94	-0.91	0.49	-0.19 ± 0.84	0.52	0.3	0.4	0.43	0.02	-0.02	0.21 ± 0.24	-0.56	1.08	1.05	0.63	0.63	0.58	0.72 ± 0.22	0.71	0.98	0.94	0.82	1.26
BcellWH2_04635	-	-	-	-	-	-	-	-	-	-	-	-	-	-	-	-	-	-	-	-	-	-	-	-	-0.21	-0.21	-0.47	0.89	0.56	0.11 ± 0.58	0.29	-1.66	-1.97	0.24	-1.08	-1.11	-0.98 ± 0.91	-0.77	-0.96	-0.69	0.19	-1.48	0.65	-0.33 ± 0.94	-0.69	-0.43	-1.27	0.26	-0.64
BcellWH2_04636	-1.07	1.19	0.71	1.13	1.56	0.7 ± 1.04	1.31	1.26	1.37	1.41	1.28	1.33 ± 0.06	1.8	1.48	1.35	1.37	0.96	1.39 ± 0.3	1.66	1.12	1.26	1.25	1.33	1.32 ± 0.2	1.73	2.15	2.16	1.26	1.99	1.86 ± 0.38	1.26	1.92	1.27	1.07	1.75	1.44	1.38 ± 0.29	1.8	1.65	1.47	1.62	1.56	2.1	1.69 ± 0.28	2.13	1.8	2.03	1.89	1.52
BcellWH2_04639	-1.02	0.74	0.9	0.73	0.37	0.34 ± 0.79	0.34	0.71	0.77	0.55	0.62	0.6 ± 0.17	0.67	0.54	0.58	0.72	0.77	0.65 ± 0.1	-0.21	0.96	0.86	0.84	0.76	0.64 ± 0.48	0.77	0.61	0.39	1.08	0.49	0.67 ± 0.27	0.2	0.61	0.23	0.23	0.22	0.58	0.31 ± 0.17	-0.74	0.12	0.35	0.7	0.39	-1.01	0.11 ± 0.76	0.53	0.44	0.37	0.45	0.44
BcellWH2_04642	-	-	-	-	-	-	-	-	-	-	-	-	-	-	-	-	-	-	-	-	-	-	-	-	-0.46	-0.52	-1.22	-0.73	-1.1	-0.81 ± 0.34	-0.73	-0.79	-1.06	-1.06	-0.82	-0.66	-0.9 ± 0.2	-1.19	-0.73	-1.04	-1.08	-0.18	-0.74	-0.76 ± 0.42	-0.53	-0.82	-0.67	-0.96	-1.26
BcellWH2_04650	-	-	-	-	-	-	-	-	-	-	-	-	-	-	-	-	-	-	-	-	-	-	-	-	-0.58	0.18	-0.81	-0.85	0.33	-0.34 ± 0.56	-1.22	-0.41	-0.7	0.17	-0.07	0.01	-0.15 ± 0.38	-1.29	-0.86	-0.59	-0.98	-0.82	-1.06	-0.87 ± 0.2	-0.55	-0.53	-1.02	-0.33	-1.12
BcellWH2_04651	-0.43	0.26	0.63	-0.11	0.97	0.27 ± 0.56	0.65	0.71	0.67	0.7	0.76	0.7 ± 0.04	0.99	0.67	0.79	-0.13	0.9	0.64 ± 0.45	1.75	0.65	1.28	0.92	1.29	1.18 ± 0.42	1.27	1.47	1.24	0.03	1.21	1.05 ± 0.58	0.72	1.48	1.43	1.06	0.9	1.03	1.1 ± 0.23	-1.09	1.29	1.27	1.35	1.23	1.28	1.28 ± 0.05	0.89	1.18	0.91	1	1.46
BcellWH2_04657	1.28	1.16	1.08	1.1	1.03	1.13 ± 0.1	1.11	1.03	1.04	1.05	1.11	1.07 ± 0.04	1.03	0.96	1.41	1.06	1.3	1.15 ± 0.19	0.95	1.25	1.32	1.46	1.44	1.28 ± 0.21	1.32	1.39	1.74	1.34	1.49	1.46 ± 0.17	1.51	1.16	1.31	1.32	1.35	1.48	1.36 ± 0.08	1.6	1.45	1.5	1.4	1.5	1.47	1.47 ± 0.04	1.46	1.5	1.39	1.35	1.59
BcellWH2_04678	-0.64	-1.01	-0.6	-0.59	-0.63	-0.69 ± 0.18	-0.68	-0.1	0.73	-1.57	-1.19	-0.56 ± 0.91	-1.43	-0.51	-0.14	-0.91	-0.8	-0.76 ± 0.48	1.11	1.26	-0.89	-0.93	-0.77	-0.04 ± 1.12	1.02	-0.75	-0.81	0.23	-0.06	-0.07 ± 0.76	0.09	-0.28	-0.95	-0.43	-1.01	-0.34	-0.69 ± 0.35	-0.48	-0.93	-0.58	-0.6	0.08	-0.33	-0.36 ± 0.31	0.13	-0.59	-1.15	-0.42	0.21
BcellWH2_04682	-1.08	-0.17	0.06	0.54	-0.21	-0.17 ± 0.59	0.11	0.07	0.25	-1.2	-0.1	-0.17 ± 0.59	-1.56	-0.72	-0.66	-1.19	-1.49	-1.12 ± 0.42	-1.2	-0.02	-0.85	-0.76	-0.86	-0.74 ± 0.44	-0.1	-0.28	-1.05	-0.66	-0.24	-0.47 ± 0.39	0.22	-0.08	0.37	-0.39	0.27	-1.03	-0.2 ± 0.65	-0.38	-1.59	0.52	0.14	-0.04	0.03	0.16 ± 0.25	0.51	-0.39	-0.96	-0.28	0.24
BcellWH2_04683	-1.07	-1.09	-0.59	-0.34	-0.25	-0.67 ± 0.4	0.08	-1.02	-1.04	0.27	-1.68	-0.68 ± 0.82	-0.72	-0.75	-1.28	-1.43	-0.85	-1.01 ± 0.33	-1.23	-0.89	-0.49	-0.97	-0.8	-0.88 ± 0.27	-	-	-	-	-	-	-	-	-	-	-	-	-	-	-	-	-	-	-	-	-	-	-	-	-
BcellWH2_04689	0.25	0.18	-1	-1.2	-1.38	-0.63 ± 0.79	-0.08	0.23	0.56	-1.61	-1.29	-0.44 ± 0.96	-1.35	-1.02	-0.38	0.09	-0.34	-0.6 ± 0.58	-0.54	0.5	0.8	-1.07	-0.85	-0.23 ± 0.83	-0.33	-0.27	-0.57	-0.72	-1.18	-0.62 ± 0.36	-1.12	-1.13	0.12	0.27	-0.23	-0.67	-0.13 ± 0.42	-0.59	0.28	-0.62	-1.25	0.05	-0.9	-0.68 ± 0.55	-0.37	-0.91	-0.81	-0.95	-1.23
BcellWH2_04691	-1.35	-1.07	-1.02	-0.7	-0.53	-0.93 ± 0.32	-0.85	-1.3	0.13	-0.91	-0.2	-0.62 ± 0.58	-1.38	-1.01	-0.88	-0.93	-1.04	-1.05 ± 0.2	-1.42	-1.34	-0.98	-0.41	-0.54	-0.94 ± 0.46	-	-	-	-	-	-	-	-	-	-	-	-	-	-	-	-	-	-	-	-	-	-	-	-	-
BcellWH2_04702	-	-	-	-	-	-	-	-	-	-	-	-	-	-	-	-	-	-	-	-	-	-	-	-	-0.77	-0.82	-0.99	-0.83	-0.51	-0.78 ± 0.17	-0.72	-0.65	-1.25	-1.32	-0.62	-0.73	-0.98 ± 0.36	-0.6	-0.88	-1.16	-0.39	-1.2	-0.78	-0.88 ± 0.38	-0.28	-1.04	-0.57	-0.11	-0.79
BcellWH2_04703	-	-	-	-	-	-	-	-	-	-	-	-	-	-	-	-	-	-	-	-	-	-	-	-	-0.93	-0.73	-0.46	-1.05	-0.35	-0.7 ± 0.3	-0.24	-0.92	-0.44	-0.44	-1.35	-0.88	-0.78 ± 0.43	-0.67	-0.01	-1.1	-1.2	-0.12	-0.44	-0.72 ± 0.52	-0.67	-1.07	-0.26	-0.39	-1
BcellWH2_04740	1.11	1.32	1.43	1.42	1.31	1.32 ± 0.13	1.11	1.06	0.94	1.01	1.12	1.05 ± 0.07	1.09	0.84	0.87	1.14	1.06	1 ± 0.14	-0.19	1.4	1.17	0.59	-0.87	0.42 ± 0.95	1.62	1.64	1.48	1.8	1.53	1.62 ± 0.12	1.54	1.45	1.14	1.3	1.45	1.27	1.29 ± 0.13	1.51	0.8	1.49	1.28	1.15	1.3	1.31 ± 0.14	1.48	1.36	1.53	1.32	1.15
BcellWH2_04742	-0.59	-0.01	0.04	0.3	-0.92	-0.24 ± 0.5	-0.42	-0.09	0.11	-0.03	-0.31	-0.15 ± 0.22	0.07	0.18	-1.51	0.39	0.57	-0.06 ± 0.83	-0.09	-1.09	-0.42	0.59	0.4	-0.12 ± 0.67	-1.07	-0.38	0.27	-0.54	-0.11	-0.37 ± 0.5	0.13	-0.05	-0.25	-1.86	-0.61	-0.57	-0.82 ± 0.71	-0.13	-1.14	-0.77	-1.14	-1.5	-0.57	-0.99 ± 0.41	-0.62	-1.08	-0.62	-0.92	-0.98
BcellWH2_04744	-1.16	-0.08	-0.67	-0.95	-0.7	-0.71 ± 0.41	-1.45	-1.03	-0.79	-0.95	-1.3	-1.1 ± 0.27	-0.64	-1.23	-0.77	-1.05	-0.88	-0.91 ± 0.23	-0.83	-0.2	-0.79	-0.74	-0.33	-0.58 ± 0.29	0.9	-0.59	-0.1	-0.53	0.29	-0.01 ± 0.62	-0.35	-1.22	-1.96	-0.76	-1.38	-0.06	-1.04 ± 0.81	-0.86	0.05	-0.22	-0.86	-0.41	-1.03	-0.63 ± 0.38	-0.44	0.82	-0.46	-0.41	-0.03
BcellWH2_04757	-0.71	-0.97	-0.63	-0.74	-1.04	-0.82 ± 0.18	-1.25	-1.56	-1.25	-0.83	-0.99	-1.18 ± 0.28	-0.97	0.27	-1.05	0.18	0.44	-0.23 ± 0.72	-0.9	-1.37	-0.02	-0.79	-0.95	-0.81 ± 0.49	-0.22	-0.36	-0.26	0.54	0.65	0.07 ± 0.49	0.1	-1.56	-0.03	-0.12	-0.56	-0.72	-0.36 ± 0.33	-0.41	0.2	-0.15	0.3	0.21	-0.47	-0.03 ± 0.35	-1.28	0.64	-0.69	0.11	0.35
BcellWH2_04759	-0.27	0.29	-0.76	0.26	0.29	-0.04 ± 0.47	-1.41	-0.17	-1.2	-1.59	-1.97	-1.27 ± 0.68	-0.79	-0.52	-1.08	0.15	-0.25	-0.5 ± 0.48	-0.7	-1.05	-0.72	-0.73	-0.21	-0.68 ± 0.3	0.99	-0.63	0.84	-1.14	-1.04	-0.2 ± 1.03	-1.17	-1.29	-1.71	-1.92	-1.16	-0.11	-1.23 ± 0.81	0.21	-0.51	-0.57	-0.15	0.12	0.18	-0.1 ± 0.34	0.33	0.67	-1.09	0.06	-1.03
BcellWH2_04761	-0.76	-0.92	-1.07	-0.66	-1.31	-0.94 ± 0.26	-0.15	-0.8	0.01	0.61	0.45	0.02 ± 0.56	-1.06	-0.56	-0.9	-1.25	-0.88	-0.93 ± 0.26	-1.02	-1.19	-0.86	-1.05	-1.23	-1.07 ± 0.15	-0.94	-0.85	-0.98	-0.73	-0.88	-0.88 ± 0.1	-0.71	-0.59	0.69	-0.85	-0.65	-0.84	-0.41 ± 0.74	-1.12	0.32	-0.98	-1.13	-1.25	-1.12	-1.12 ± 0.11	-0.79	-0.41	-0.67	-1	0.34
BcellWH2_04773	-	-	-	-	-	-	-	-	-	-	-	-	-	-	-	-	-	-	-	-	-	-	-	-	-1.1	-1.12	-1.31	-0.92	-0.89	-1.07 ± 0.17	-0.98	-0.61	-1.16	-1.18	-0.66	-0.5	-0.87 ± 0.35	-0.5	-0.49	-0.7	0.05	-0.88	-0.81	-0.58 ± 0.43	-1.08	-0.35	-1.25	-0.55	-1.04
BcellWH2_04781	-0.21	0.85	0.63	0.62	0.44	0.46 ± 0.41	0.28	0.28	0.37	0.12	-0.24	0.17 ± 0.24	0.23	0.63	0.57	0.68	0.76	0.57 ± 0.2	1.17	0.81	0.29	-0.19	0.15	0.45 ± 0.54	0.83	0.59	0.65	1.18	0.35	0.72 ± 0.31	0.12	0.49	-0.24	-0.71	-0.44	-0.5	-0.47 ± 0.19	-0.62	1.16	0.35	0.94	-1.43	-0.54	-0.17 ± 1.04	-1.02	-0.68	-0.27	-0.57	-1.07
BcellWH2_04791	-	-	-	-	-	-	-	-	-	-	-	-	-	-	-	-	-	-	-	-	-	-	-	-	0.06	-0.63	0.7	0.98	-0.77	0.07 ± 0.78	-1.27	-0.54	-1.36	-1.33	-1.24	-0.08	-1 ± 0.62	-0.11	-1.22	0.25	-0.94	-0.27	-1.17	-0.53 ± 0.65	0.4	0.28	0.32	-0.96	-0.99
BcellWH2_04798	-1.35	-0.92	-1.45	-0.79	-0.77	-1.06 ± 0.32	-0.31	-0.88	-0.7	-1.47	-0.29	-0.73 ± 0.48	-1.17	-0.72	-0.94	-1.06	-1.19	-1.01 ± 0.19	-1.02	-1.03	-0.63	-0.75	-0.87	-0.86 ± 0.17	-	-	-	-	-	-	-	-	-	-	-	-	-	-	-	-	-	-	-	-	-	-	-	-	-
BcellWH2_04803	-	-	-	-	-	-	-	-	-	-	-	-	-	-	-	-	-	-	-	-	-	-	-	-	-0.62	-0.66	-0.5	-0.81	-0.56	-0.63 ± 0.12	-1.15	-0.68	-1.38	-0.97	-1.17	-0.17	-0.92 ± 0.53	-0.87	-0.64	-0.81	-0.96	-0.33	-0.94	-0.76 ± 0.29	-0.89	-0.39	-0.91	-0.61	-0.93
BcellWH2_04808	-	-	-	-	-	-	-	-	-	-	-	-	-	-	-	-	-	-	-	-	-	-	-	-	-1.24	-0.71	-0.6	-0.82	-0.78	-0.83 ± 0.25	-0.93	-0.59	-0.05	-0.41	-0.82	-0.7	-0.5 ± 0.34	-0.68	-0.14	-0.55	-1.23	-1.42	-0.75	-0.99 ± 0.41	-1.54	-0.65	-0.64	-0.9	-0.94
BcellWH2_04809	-0.37	0.25	0.33	0.51	0.78	0.3 ± 0.42	-0.06	-0.21	-0.31	0.31	0.29	0.01 ± 0.29	-0.12	-1.28	0.25	-0.23	0.6	-0.16 ± 0.71	1.25	0.55	-0.57	-0.12	-0.86	0.05 ± 0.86	1.18	-0.35	0.8	0.95	0.66	0.65 ± 0.59	0.49	-0.01	-0.41	-0.35	0.2	0.51	-0.01 ± 0.44	1.06	0.65	0.64	0.33	0.38	-1.34	0 ± 0.9	0.75	0.82	0.53	0.81	0.62
BcellWH2_04811	0.9	0.05	-0.9	-1.15	-0.49	-0.32 ± 0.82	-1.35	-1.06	-0.95	-1.6	-1.39	-1.27 ± 0.26	-0.63	-0.95	-0.48	-0.89	-0.19	-0.63 ± 0.31	-1.04	-0.82	-1.24	-0.76	-1.08	-0.99 ± 0.2	-	-	-	-	-	-	-	-	-	-	-	-	-	-	-	-	-	-	-	-	-	-	-	-	-
BcellWH2_04814	-0.16	-0.02	-0.34	0.22	-0.11	-0.08 ± 0.21	0.19	0.18	-0.18	0	0.03	0.05 ± 0.15	0.03	-1.27	-0.91	0.34	0.44	-0.27 ± 0.77	-0.55	-1.08	-0.01	0.39	0.07	-0.23 ± 0.58	0.41	0.29	-0.3	0.04	-0.82	-0.07 ± 0.5	-0.89	0.15	0.15	-0.05	-0.42	0.21	-0.03 ± 0.29	0.85	0.13	-0.31	-1.53	0.13	0.21	-0.38 ± 0.8	0.25	0.42	0.04	0.25	0.15
BcellWH2_04873	-	-	-	-	-	-	-	-	-	-	-	-	-	-	-	-	-	-	-	-	-	-	-	-	-0.46	-0.89	-0.67	-0.58	-1.43	-0.81 ± 0.38	-0.51	-0.52	-0.61	-0.89	-0.87	-0.46	-0.71 ± 0.21	-0.62	-0.9	-1.24	-0.74	-0.7	-0.74	-0.86 ± 0.26	-0.78	-0.91	-0.85	-0.83	-0.99
BcellWH2_04922	-	-	-	-	-	-	-	-	-	-	-	-	-	-	-	-	-	-	-	-	-	-	-	-	-1.14	-0.81	-0.77	-1	-0.66	-0.88 ± 0.19	-1.07	-0.92	-0.1	-0.95	-0.62	-1.02	-0.67 ± 0.42	-0.78	-0.89	-1.25	-0.82	-1.04	-0.39	-0.88 ± 0.37	-0.36	-1.61	-0.67	-0.6	-0.64
BcellWH2_04943	-	-	-	-	-	-	-	-	-	-	-	-	-	-	-	-	-	-	-	-	-	-	-	-	-0.42	-0.53	-0.51	-1.1	-1.11	-0.74 ± 0.34	-1.21	0.73	-1.56	-0.34	0.1	0.25	-0.39 ± 0.82	-0.67	-1.15	-1.06	-1.06	-1.03	-0.91	-1.01 ± 0.07	-1.14	-0.73	-0.78	-0.31	-0.72
BcellWH2_04946	-	-	-	-	-	-	-	-	-	-	-	-	-	-	-	-	-	-	-	-	-	-	-	-	-0.92	-1	-1.27	-1.29	-1.18	-1.13 ± 0.16	-0.85	0.41	-0.08	-0.01	0.49	-1.11	-0.18 ± 0.67	-0.52	-0.55	-0.6	-0.81	-0.7	-1.06	-0.79 ± 0.2	-1.03	-0.96	-0.83	-1.32	-0.83
BcellWH2_04948	-0.36	0.37	0.17	-0.63	-0.66	-0.22 ± 0.47	-1.62	-1.21	-1.18	-1.57	-0.41	-1.2 ± 0.48	-0.27	-1.06	-0.82	-0.79	-0.77	-0.74 ± 0.29	-0.7	-0.58	-0.91	-0.97	-0.9	-0.81 ± 0.17	-	-	-	-	-	-	-	-	-	-	-	-	-	-	-	-	-	-	-	-	-	-	-	-	-
BcellWH2_04949	-0.87	0.51	-1.26	-1.14	-1.25	-0.8 ± 0.75	0.08	-1.1	0.21	-0.04	0.12	-0.14 ± 0.54	-0.81	-0.75	-0.91	-0.55	-0.57	-0.72 ± 0.16	-0.83	-1.1	-1.11	-0.86	-1.06	-0.99 ± 0.13	-0.46	-0.31	-0.67	-0.77	-0.61	-0.56 ± 0.18	-1.16	0.22	-0.08	0.53	-0.76	-0.55	-0.22 ± 0.57	-1.29	-1.02	-1.32	-1.24	-0.93	-1.02	-1.13 ± 0.18	-0.44	-0.86	-1.65	-0.8	-1.12
BcellWH2_04986	-	-	-	-	-	-	-	-	-	-	-	-	-	-	-	-	-	-	-	-	-	-	-	-	-1.01	-0.2	-0.71	-0.81	-0.74	-0.69 ± 0.3	-0.48	-0.9	-1.45	-0.21	-0.67	-0.85	-0.8 ± 0.52	-1.23	-0.82	-0.68	-0.95	-0.95	-0.76	-0.84 ± 0.13	-1.1	-0.44	-1.02	-0.5	-0.42
BcellWH2_04989	-0.41	0.42	-1.13	-0.89	-0.29	-0.46 ± 0.6	-1.02	-1.2	-1.06	-0.94	-1.71	-1.19 ± 0.31	-0.66	-0.6	-1.04	0.21	-1.16	-0.65 ± 0.54	-0.93	0.64	-0.77	-0.56	-0.62	-0.45 ± 0.62	-0.78	-0.85	-1.35	-0.12	0.39	-0.54 ± 0.68	-0.59	-1.19	-1.69	-0.69	-1.6	-1.26	-1.31 ± 0.45	-0.77	0.62	0.1	0.12	-0.11	0.12	0.06 ± 0.11	0.43	-0.62	0.14	0.45	0.42
BcellWH2_04996	-	-	-	-	-	-	-	-	-	-	-	-	-	-	-	-	-	-	-	-	-	-	-	-	-0.81	-1.06	-0.74	-0.29	0.38	-0.5 ± 0.57	-0.03	0.41	-0.08	0.23	0.34	0.11	0.15 ± 0.18	1.85	-0.34	0.67	0.02	-0.49	0.24	0.11 ± 0.48	0.65	-0.98	0.41	0.41	-1.11
BcellWH2_05025	0.7	1.26	1.29	1.07	0.81	1.03 ± 0.27	0.98	0.5	0.34	0.82	0.92	0.71 ± 0.28	0.61	0.15	1.01	0.32	-0.36	0.35 ± 0.51	0.99	0.59	0.99	0.73	-0.06	0.65 ± 0.43	1.92	1.82	1.56	1.96	1.89	1.83 ± 0.16	1.65	1.73	1.7	1.78	1.89	1.87	1.81 ± 0.09	1.71	1.94	1.85	1.66	1.7	1.63	1.71 ± 0.1	1.86	1.91	1.93	1.73	1.86
BcellWH2_05039	-0.81	-1.21	-0.95	0.11	-1.37	-0.84 ± 0.58	-0.07	0.36	0.12	-1.48	-0.35	-0.28 ± 0.72	-1	-0.66	-0.75	-0.24	-1.26	-0.78 ± 0.38	-0.8	-0.88	-0.53	-1.03	-0.5	-0.75 ± 0.23	-	-	-	-	-	-	-	-	-	-	-	-	-	-	-	-	-	-	-	-	-	-	-	-	-
BcellWH2_05049	-0.99	-0.62	-0.77	-0.62	-0.78	-0.76 ± 0.15	-1.05	-0.9	-0.86	-0.34	-1.56	-0.94 ± 0.44	-0.85	-0.7	-0.45	-1.07	-1.1	-0.83 ± 0.27	-1.06	-0.58	-0.85	-1.07	-0.8	-0.87 ± 0.21	-	-	-	-	-	-	-	-	-	-	-	-	-	-	-	-	-	-	-	-	-	-	-	-	-
BcellWH2_05052	-	-	-	-	-	-	-	-	-	-	-	-	-	-	-	-	-	-	-	-	-	-	-	-	-0.74	-0.68	-0.65	-0.68	-0.41	-0.63 ± 0.13	0.25	-1.1	0.41	-0.14	-1.4	0.25	-0.22 ± 0.82	-0.69	-0.66	-1.12	-1.44	-1.17	-0.88	-1.15 ± 0.23	-1.01	-0.67	-0.46	0.52	-0.44
BcellWH2_05053	-0.98	-0.02	-0.67	-0.82	-1.15	-0.72 ± 0.43	0.46	-0.65	-1.25	0.41	0.23	-0.16 ± 0.76	-0.79	-1.08	-0.59	-0.87	-0.94	-0.85 ± 0.18	-0.58	-0.58	-0.33	0.95	-0.35	-0.18 ± 0.64	-0.48	-0.86	-0.75	-0.61	-1.05	-0.75 ± 0.22	-0.72	-0.23	0.27	-1.3	-1.09	-1.16	-0.82 ± 0.73	-0.71	-0.62	-0.77	-0.98	-0.72	-0.84	-0.83 ± 0.11	-0.79	-0.97	-0.53	-0.87	-0.85
BcellWH2_05055	-0.81	-0.41	-1.34	-0.34	-0.95	-0.77 ± 0.41	0.33	-0.06	0.01	-0.41	-0.04	-0.03 ± 0.26	-0.52	-0.95	-0.56	-0.94	-0.66	-0.73 ± 0.21	-0.47	-0.79	-0.85	-0.75	-0.88	-0.75 ± 0.16	-0.57	-0.14	-0.64	-0.24	-1.18	-0.55 ± 0.41	0.39	0.44	0.32	0.19	-1.43	-0.67	-0.4 ± 0.82	-0.69	-1.23	-0.4	0.57	-1.33	-1.48	-0.66 ± 0.95	-0.62	-0.33	0.24	0.26	-1.02
BcellWH2_05056	-	-	-	-	-	-	-	-	-	-	-	-	-	-	-	-	-	-	-	-	-	-	-	-	-0.78	-0.32	-0.96	-0.78	-0.48	-0.66 ± 0.26	-0.58	-0.97	0.78	-0.43	-1.02	-1.01	-0.42 ± 0.84	-0.17	0.2	-1.1	-0.72	-1.01	-0.82	-0.91 ± 0.17	-1.14	-0.93	-1.06	-0.67	-0.94
BcellWH2_05057	0.42	0.48	1.63	1.39	1.27	1.04 ± 0.55	0.69	1.3	1.19	1.21	1.22	1.12 ± 0.24	1.48	1.21	1.5	1.35	1.61	1.43 ± 0.15	1.37	1.06	1.55	1.06	1.44	1.3 ± 0.23	1.21	1.57	1.37	1.51	1.6	1.45 ± 0.16	1.46	1.68	2.12	1.9	1.93	1.52	1.87 ± 0.25	2.12	1.92	2	1.93	1.77	1.86	1.89 ± 0.1	1.05	1.26	1.41	1.33	1.88
BcellWH2_05059	0.9	0.58	0.26	-0.21	-0.53	0.2 ± 0.58	-0.02	-0.68	-0.64	-0.71	-0.07	-0.42 ± 0.35	-0.77	-0.53	0.12	0.11	-0.9	-0.39 ± 0.48	0.09	-0.6	-0.97	0.32	-1.07	-0.45 ± 0.63	1.35	0.95	0.93	1.45	0.99	1.13 ± 0.25	0.21	-0.21	0.73	0.25	0.43	0.35	0.44 ± 0.21	0.98	0.86	0.32	0.67	0.59	0.79	0.59 ± 0.2	0.73	1.16	0.62	0.57	0.76
BcellWH2_05060	-	-	-	-	-	-	-	-	-	-	-	-	-	-	-	-	-	-	-	-	-	-	-	-	-0.43	-0.51	-0.61	-0.58	-1.11	-0.65 ± 0.27	-1.06	-1.26	-0.2	-0.29	-0.98	-0.98	-0.61 ± 0.43	-0.82	-0.74	-0.88	0.16	0.33	0.22	-0.04 ± 0.57	-0.75	-0.71	-0.47	-1.4	-1.01
BcellWH2_05065	-	-	-	-	-	-	-	-	-	-	-	-	-	-	-	-	-	-	-	-	-	-	-	-	-1.11	0.45	0.42	0.15	0.16	0.01 ± 0.65	0.15	-0.13	0.19	-0.04	-0.1	0.11	0.04 ± 0.13	0.97	0.06	0.04	-0.11	-0.07	-0.02	-0.04 ± 0.06	-0.1	0.56	0.08	0.08	0.47
BcellWH2_05066	0.87	0.43	0.61	0.31	0.65	0.57 ± 0.22	0.35	0.55	0.79	0.77	0.69	0.63 ± 0.18	-0.14	0.65	0.35	0.16	-1.32	-0.06 ± 0.76	0.63	0.44	0.52	-0.22	0.49	0.37 ± 0.34	0.58	1.13	0.09	0.39	-0.06	0.43 ± 0.47	0.11	1.05	0.18	0.2	0.77	0.7	0.46 ± 0.31	-0.45	-0.83	1.09	-0.8	-1.19	-0.71	-0.4 ± 1.01	0.26	-1.22	0.79	0.58	-1.21
BcellWH2_05070	0.07	-0.52	0.23	-0.05	0	-0.05 ± 0.28	-0.72	0	-1.01	-0.97	-0.84	-0.71 ± 0.41	0.2	-0.95	-0.7	-1.37	-0.67	-0.7 ± 0.57	-0.52	-0.21	-0.64	-0.33	-0.25	-0.39 ± 0.19	-1.13	-1.26	-0.9	-0.68	-0.35	-0.86 ± 0.36	-0.09	-0.83	-0.35	-0.53	-1.39	-0.69	-0.74 ± 0.46	-0.85	-0.62	-0.91	-0.08	-0.59	-0.89	-0.61 ± 0.39	-0.66	-0.8	-0.69	-0.17	-0.79
BcellWH2_05072	-	-	-	-	-	-	-	-	-	-	-	-	-	-	-	-	-	-	-	-	-	-	-	-	-0.79	-0.35	0.09	-0.75	-0.52	-0.47 ± 0.36	-1.14	-0.2	-0.79	-0.46	-0.91	-0.79	-0.74 ± 0.19	-0.91	-1.23	-1.45	-0.43	-0.69	-0.89	-0.87 ± 0.43	-1.03	-0.71	0.25	0.04	-0.83
BcellWH2_05073	1.08	-1.77	0.19	-0.89	-0.59	-0.4 ± 1.08	-0.46	-0.84	0.28	0.13	0.08	-0.16 ± 0.47	1.2	0.09	-1.12	-0.06	0.63	0.15 ± 0.87	2.12	-0.46	0.03	0.24	0.51	0.49 ± 0.98	0.63	0.13	0.48	0.67	0.16	0.41 ± 0.26	0.07	0.32	0.61	0.56	0.38	0.16	0.43 ± 0.2	-0.51	0.53	1.18	0.03	0.48	0.37	0.51 ± 0.48	0.39	0.37	0.14	0.31	0.71
BcellWH2_05075	1.3	0.66	1.51	1.21	1.15	1.17 ± 0.31	0.86	0.79	1.07	0.89	0.72	0.87 ± 0.13	0.86	0.64	0.95	0.42	0.84	0.74 ± 0.21	0.08	-0.08	1.45	0.67	0.94	0.61 ± 0.63	1.3	1.73	1.79	2.01	2.1	1.79 ± 0.31	1.7	1.23	1.54	1.6	1.57	1.58	1.58 ± 0.03	0.79	1.9	1.93	1.78	1.77	1.86	1.84 ± 0.08	1.86	1.66	1.77	1.66	1.84
BcellWH2_05076	-0.43	-0.22	-0.02	0.36	0	-0.06 ± 0.29	0.72	0.48	0.28	0.55	0.48	0.5 ± 0.16	0.92	0.49	0.2	0.58	0.42	0.52 ± 0.26	0.75	0.37	0.34	-1.13	-1.49	-0.23 ± 1.01	0.56	1.09	1.18	-0.77	0.85	0.58 ± 0.79	0.49	0.25	0.56	0.81	0.8	0.65	0.7 ± 0.13	-0.31	0.76	0.08	0.8	0.54	0.54	0.49 ± 0.3	0.59	0.53	0.73	0.37	0.51
BcellWH2_05077	0.14	1.48	1.89	1.93	1.74	1.44 ± 0.74	1.54	1.67	1.42	1.52	1.43	1.52 ± 0.1	1.93	1.14	1.35	1.12	1.09	1.32 ± 0.35	1.43	1.71	1.62	1.05	1.33	1.43 ± 0.26	1.31	2	1.92	1.86	2.07	1.83 ± 0.3	1.73	1.68	1.81	1.83	1.41	1.9	1.74 ± 0.22	1.53	1.85	1.74	1.9	1.3	1.24	1.55 ± 0.33	1.38	1.71	1.69	1.87	1.9
BcellWH2_05083	1.24	1.79	1.56	1.96	1.73	1.66 ± 0.27	1.48	1.16	1.28	1.43	1.31	1.33 ± 0.13	1.08	1.2	0.98	0.77	1.02	1.01 ± 0.16	1.4	1.38	1.05	1.26	1.11	1.24 ± 0.16	1.63	1.79	1.83	1.59	2.19	1.81 ± 0.24	1.51	1.75	1.36	1.67	1.4	1.65	1.52 ± 0.16	1.56	1.3	1.6	1.69	1.54	1.84	1.67 ± 0.13	1.82	1.36	1.4	1.65	1.56
BcellWH2_05086	-	-	-	-	-	-	-	-	-	-	-	-	-	-	-	-	-	-	-	-	-	-	-	-	-0.58	-0.62	-0.92	-1.12	-0.87	-0.82 ± 0.22	0.12	-0.39	-1.27	-0.16	-0.75	-0.44	-0.66 ± 0.48	-0.68	-0.94	-0.59	0.15	-0.92	-0.67	-0.51 ± 0.46	-0.93	-0.86	-0.04	-1.08	-0.83
BcellWH2_05091	-	-	-	-	-	-	-	-	-	-	-	-	-	-	-	-	-	-	-	-	-	-	-	-	-0.25	-0.5	-0.1	-0.5	-1.23	-0.52 ± 0.43	-1.11	-1.42	-2.1	0.09	0.78	-0.83	-0.51 ± 1.25	-0.23	-1.25	1.18	-1.29	0.79	0.92	0.4 ± 1.14	0.71	1.01	-0.91	-1.03	-0.62
BcellWH2_05102	-0.1	-1.42	-1.37	-0.62	-1.38	-0.98 ± 0.59	-0.73	-1.61	-0.05	0.17	0.08	-0.43 ± 0.75	0.66	0.42	0.53	0.18	0.5	0.46 ± 0.18	1.37	-0.75	-0.61	-0.15	-0.88	-0.21 ± 0.92	0.24	0.54	0.11	-0.77	0.52	0.13 ± 0.54	0.48	0.25	0.4	0.82	0.8	0.56	0.64 ± 0.2	-0.49	-1.24	0.04	0.56	0.68	0.3	0.4 ± 0.29	-0.78	-1.03	0.54	-0.8	0.49
BcellWH2_05105	-0.92	0.53	-1	-0.5	0.24	-0.33 ± 0.69	-1.74	-1.26	-1.04	0.43	-0.15	-0.75 ± 0.88	-0.79	0.38	-0.4	-0.89	-0.65	-0.47 ± 0.51	-0.29	-0.69	-0.56	-0.64	-1.22	-0.68 ± 0.34	0.65	0.66	0.43	1.02	0.35	0.62 ± 0.26	0.23	-1.81	-1.79	0.15	0.43	0.19	-0.25 ± 1.03	0.72	-0.01	0.59	-0.55	0.05	0.31	0.1 ± 0.49	0.52	0.3	0.26	0.21	-1.55
BcellWH2_05106	-	-	-	-	-	-	-	-	-	-	-	-	-	-	-	-	-	-	-	-	-	-	-	-	-0.57	-1.09	-1.27	-0.49	-0.57	-0.8 ± 0.36	-0.28	-0.52	-0.47	0.04	-0.4	-0.95	-0.45 ± 0.41	-0.42	-0.82	-0.42	-0.33	-1.2	0	-0.49 ± 0.51	-0.51	-0.58	-0.84	-0.96	-0.87
BcellWH2_05112	0.97	1.14	1.72	1.57	1.45	1.37 ± 0.31	1.14	0.87	1.1	0.74	1.04	0.98 ± 0.17	0.67	0.53	0.93	1.14	0.71	0.8 ± 0.24	0.13	0.91	0.47	1.04	0.95	0.7 ± 0.39	1.61	1.78	1.47	2.08	1.86	1.76 ± 0.23	2.08	1.61	1.48	1.64	1.47	1.31	1.48 ± 0.13	1.27	1.67	1.62	1.71	1.58	1.69	1.65 ± 0.06	1.73	1.57	1.78	1.57	1.64
BcellWH2_05115	-0.41	-1.21	-0.7	-1.07	-0.94	-0.87 ± 0.32	0.03	-1.53	0.59	-0.19	-0.48	-0.31 ± 0.78	-0.83	-0.67	-1.43	-1.03	-1.21	-1.04 ± 0.3	-0.9	-0.77	-0.89	-0.33	-0.93	-0.76 ± 0.25	-1.04	-0.9	-1.16	-0.73	-0.65	-0.9 ± 0.21	0.31	-0.77	0.23	-1.16	-0.93	-0.74	-0.65 ± 0.61	-0.96	-0.95	-0.84	-1.03	-0.8	-0.66	-0.83 ± 0.16	-1.02	-0.7	-0.97	-0.56	-1.35
BcellWH2_05116	0.56	0.19	-1.37	-0.44	0.26	-0.16 ± 0.77	-0.25	0.01	-0.52	0.05	-0.45	-0.23 ± 0.26	0.24	-1.27	-0.99	0.56	-0.71	-0.43 ± 0.79	-0.23	-0.78	0.79	-1.25	0.42	-0.21 ± 0.84	0.26	0.52	-0.14	-0.59	-0.76	-0.14 ± 0.54	-0.98	-0.21	-0.41	-0.06	0.22	-0.09	-0.08 ± 0.26	-0.14	-0.44	-0.02	0.06	-0.08	-0.04	-0.02 ± 0.06	0.22	-0.82	0.23	0.08	-0.92
BcellWH2_05118	-1.33	-1.12	-1.03	-0.78	-1.13	-1.08 ± 0.2	-0.26	-0.14	-0.64	-1.1	-0.51	-0.53 ± 0.37	-0.98	-0.62	-0.73	-0.87	-0.66	-0.77 ± 0.15	-1.54	-0.98	-1.06	-1.07	-0.59	-1.05 ± 0.34	-	-	-	-	-	-	-	-	-	-	-	-	-	-	-	-	-	-	-	-	-	-	-	-	-
BcellWH2_05121	-	-	-	-	-	-	-	-	-	-	-	-	-	-	-	-	-	-	-	-	-	-	-	-	-0.48	-0.77	-1.37	-0.22	-0.94	-0.75 ± 0.44	0.97	-0.23	-2.07	0.29	-1.31	-0.2	-0.82 ± 1.07	-0.39	0.74	0.12	-1.16	-1.3	-1.52	-0.96 ± 0.74	-0.79	-0.44	0.13	0.78	0.86
BcellWH2_05126	-	-	-	-	-	-	-	-	-	-	-	-	-	-	-	-	-	-	-	-	-	-	-	-	-0.51	-0.66	-1.17	-1.33	-0.62	-0.86 ± 0.37	-0.41	-0.84	-1.53	-0.02	-0.47	-1.01	-0.76 ± 0.66	-0.8	-0.86	-0.91	-0.77	-0.9	-0.02	-0.65 ± 0.42	-0.6	-1.1	-0.88	-0.84	-1.06
BcellWH2_05131	-0.85	-0.69	-0.39	-1.12	-1.36	-0.88 ± 0.38	0.1	0.03	-0.06	0.02	-0.18	-0.02 ± 0.11	-1.04	-1.18	-0.76	-0.99	-0.21	-0.84 ± 0.38	-1	-0.47	-0.63	-0.6	-0.53	-0.65 ± 0.21	-0.4	-0.4	-0.74	-0.38	-0.67	-0.52 ± 0.17	0.7	0.63	0.53	-0.24	0.32	-1.43	-0.21 ± 0.88	-0.8	-1.06	-0.53	-1.11	-0.91	-1.16	-0.93 ± 0.28	-0.79	-0.75	-0.95	-0.73	-0.66
BcellWH2_05134	-0.23	0.46	-0.12	0.4	0.23	0.15 ± 0.31	-0.11	-0.52	-1.04	-0.05	0.13	-0.32 ± 0.47	-1.09	-0.97	-0.35	-1.22	-1.04	-0.93 ± 0.34	-0.24	0.54	-0.74	-1	-0.8	-0.45 ± 0.62	-0.03	-0.6	-1.26	0.22	-0.13	-0.36 ± 0.58	-0.19	0.01	-0.15	-0.54	-0.53	-0.03	-0.31 ± 0.26	0.6	0.29	0.34	-0.35	-0.33	-0.4	-0.19 ± 0.35	-0.01	0.33	0.01	-0.24	-0.73
BcellWH2_05136	-0.31	0.61	-1.46	0.44	1.23	0.1 ± 1.03	0.32	0.29	0.26	-0.63	-0.02	0.04 ± 0.4	0.07	0.92	-1.34	0.54	1.08	0.25 ± 0.97	-0.76	0.86	-0.92	0.51	-0.62	-0.18 ± 0.81	1.36	-0.82	-1.27	-0.25	-0.51	-0.3 ± 1	0.12	0.12	-0.16	-0.14	-0.93	0.47	-0.19 ± 0.57	-0.28	-1	-0.69	-0.17	0.38	0.24	-0.06 ± 0.48	-0.76	-0.77	-1.39	-0.48	-0.24
BcellWH2_05137	-0.49	-0.59	1.02	1.06	0.47	0.3 ± 0.8	0.53	0.7	0.82	-0.64	0.26	0.33 ± 0.58	-0.73	0.85	0.49	-1.59	-0.89	-0.37 ± 1.02	-0.5	-1.15	0.09	-1.16	-1.35	-0.81 ± 0.6	0.99	1.48	1	0.94	0.68	1.02 ± 0.29	0.61	1.14	0.56	1	0.9	-0.19	0.57 ± 0.54	-0.9	0.33	0.04	0.83	0.77	0.8	0.61 ± 0.38	-0.35	0.74	-0.06	0.18	0.36
BcellWH2_05149	1.4	0.4	0.84	-1.18	-1.05	0.08 ± 1.15	-0.34	-0.06	-1.08	-0.4	-0.79	-0.53 ± 0.4	0.28	-0.54	0.25	-0.16	0.12	-0.01 ± 0.34	0.64	-0.18	-0.93	-0.97	-1	-0.49 ± 0.72	1.14	0.97	-1.78	-0.27	0.5	0.11 ± 1.19	0.23	-0.4	0.07	0.06	0.41	-1.75	-0.3 ± 0.98	1.31	-1.11	0.79	0.08	0.51	0.39	0.44 ± 0.29	0.54	0.53	-0.11	-1.38	-0.69
BcellWH2_05175	-	-	-	-	-	-	-	-	-	-	-	-	-	-	-	-	-	-	-	-	-	-	-	-	-0.76	-1.22	-1.01	-1.08	-0.59	-0.93 ± 0.26	0.72	-0.54	-1.27	-0.06	-0.81	-0.64	-0.69 ± 0.5	-1.56	-0.59	-0.47	-0.96	-0.5	-0.42	-0.59 ± 0.25	-0.67	-1.11	-0.86	-0.57	-1.23
[truncated: 93 more rows]
[truncated: 19 more columns]

## Sheet: Table 3c
Supplementary File 3: Meta-proteomic analysis of the effects of pea fiber, PFABN and SBABN supplementation of the HiSF-LoFV diet on gene expression in members of the defined community (related to Fig. 2).
[truncated: 4 more rows]
[truncated: 19 more columns]

[truncated: 10 more sheets: Table 3d, Table 3e, Table 3f, Table 3g, Table 3h, Table 3i, Table 3j, Table 3k, Table 3l, Table 3m]
