# Supplementary material for: Microbiota functional activity biosensors for characterizing nutrient metabolism in vivo
Source: eLife. 2021 Mar 8;10:e64478. doi: 10.7554/eLife.64478 (PMC7939548; doi:10.7554/eLife.64478)
Supplement: Supplementary file 4. — Summary statistics from linear models of gene fitness during (A) pea fiber, (B) PFABN, and (C) SBABN supplementation in (1) Bacteroides cellulosilyticus WH2, (2) Bacteroides ovatus ATCC8483, (3) Bacteroides thetaiotaomicron VPI-5482, and (4) Bacteroides vulgatus ATCC8482. [file elife-64478-supp4.xlsx]

## Sheet: Table 4a-i
Supplementary File 4: INSeq analysis of fitness determinants in diet-responsive Bacteroides represented in the defined community as a function of pea fiber, PFABN and SBABN supplementation of the HiSF-LoFV diet (related to Fig. 2).
(a) Summary statistics from linear models of gene fitness during pea fiber supplementation (Experiment 1)
(i) Bacteroides cellulosilyticus WH2
Locus_Tag	Log2 fold-change (Pea fiber relative to HiSF-LoFV)	Log 2 average counts	P value	Adjusted P value (BH)	Protein accession number	Protein annotation	EC Annotation	CAZy module	Predicted PUL number	Literature PUL number
BcellWH2_04297	2.26	8.59	8.58942e-14	2.04085e-10	ALJ61514.1	SusD family protein	NOT DEFINED		BcellWH2:87	BcellWH2:102
BcellWH2_00923	-2.9	8.69	7.73715e-14	2.04085e-10	ALJ58185.1	Sensor histidine kinase TmoS	Unknown		BcellWH2:5	BcellWH2:5
BcellWH2_04327	2.3	8.69	7.06668e-12	1.11936e-08	ALJ61544.1	Sensor histidine kinase TmoS	Unknown		BcellWH2:87	BcellWH2:104
BcellWH2_04296	2.85	8.02	5.81724e-11	6.91089e-08	ALJ61513.1	TonB-dependent Receptor Plug Domain protein	Unknown		BcellWH2:87	BcellWH2:102
BcellWH2_04307	1.58	9.12	2.01231e-10	1.9125e-07	ALJ61524.1	Sensor histidine kinase TmoS	Unknown		BcellWH2:87	BcellWH2:102
BcellWH2_03480	-1.57	9.37	2.04097e-09	1.5258e-06	ALJ60709.1	hypothetical protein	Unknown
BcellWH2_02912	1.34	9.9	2.24761e-09	1.5258e-06	ALJ60151.1	TonB dependent receptor	NOT DEFINED		BcellWH2:54	BcellWH2:63
BcellWH2_00922	2.11	8.71	4.71254e-09	2.79925e-06	ALJ58184.1	Extracellular endo-alpha-(1->5)-L-arabinanase precursor	EC3.2.1.99	GH43_4	BcellWH2:5	BcellWH2:5
BcellWH2_04060	2.01	8.19	2.01495e-08	1.06389e-05	ALJ61280.1	hypothetical protein	EC3.1.1.11		BcellWH2:83
BcellWH2_01244	-3.25	7.57	2.52554e-08	1.20014e-05	ALJ58506.1	Lipoteichoic acid synthase 2	EC2.7.8.20
BcellWH2_04298	1.44	8.54	6.9512e-08	2.62253e-05	ALJ61515.1	hypothetical protein	Unknown		BcellWH2:87	BcellWH2:102
BcellWH2_00808	1.75	8.2	7.17444e-08	2.62253e-05	ALJ58071.1	hypothetical protein	Unknown
BcellWH2_03347	-2.53	7.76	6.63937e-08	2.62253e-05	ALJ60580.1	Evolved beta-galactosidase subunit alpha	EC3.2.1.23	GH2
BcellWH2_01329	1.81	7.94	1.91787e-07	6.07582e-05	ALJ58590.1	fructoselysine 6-kinase	EC2.7.1.213
BcellWH2_00433	-1.26	9.1	3.45636e-07	0.000102565	ALJ57708.1	hypothetical protein	Unknown
BcellWH2_00924	-2.74	7.72	3.66921e-07	0.000102565	ALJ58186.1	TonB-dependent Receptor Plug Domain protein	NOT DEFINED		BcellWH2:5	BcellWH2:5
BcellWH2_05465	-0.96	9.89	6.8368e-07	0.000180492	ALJ62663.1	Outer membrane protein assembly factor BamA precursor	NOT DEFINED
BcellWH2_04299	3.15	6.94	1.21672e-06	0.000304307	ALJ61516.1	SusD family protein	NOT DEFINED		BcellWH2:87	BcellWH2:102
BcellWH2_01346	1.55	7.8	1.75062e-06	0.000396141	ALJ58607.1	Sensor histidine kinase YehU	Unknown
BcellWH2_00695	1.31	8.67	1.55876e-06	0.000370361	ALJ57959.1	putative undecaprenyl-phosphate N-acetylglucosaminyl 1-phosphate transferase	EC2.4.1.-
BcellWH2_00621	-1.66	8.05	2.18865e-06	0.000452193	ALJ57889.1	Poly-beta-1,6-N-acetyl-D-glucosamine synthase	EC2.4.1.336	GT2
BcellWH2_05447	-6.61	6.25	1.46548e-07	4.97426e-05	ALJ62646.1	Altronate oxidoreductase	EC1.1.1.58
BcellWH2_04836	-1.17	8.66	2.09892e-06	0.000452193	ALJ62045.1	Retaining alpha-galactosidase precursor	EC3.2.1.20	GH97	BcellWH2:90	BcellWH2:108
BcellWH2_03959	-2.39	8	2.67665e-06	0.000529977	ALJ61179.1	UDP-Galalpha-D-GlcNAc-diphosphoundecaprenol beta-1,3-galactosyltransferase	EC2.4.1.303	GT2
BcellWH2_04949	1.67	7.69	4.95061e-06	0.000840189	ALJ62158.1	Aspartate/alanine antiporter	NOT DEFINED
BcellWH2_02645	-1.17	9.01	4.36108e-06	0.000797071	ALJ59884.1	hypothetical protein	Unknown	GH115	BcellWH2:47	BcellWH2:53
BcellWH2_01491	1.04	9.18	4.7327e-06	0.000832955	ALJ58746.1	Helicase IV	EC3.6.4.12
BcellWH2_01577	2.02	7.21	6.98231e-06	0.00114414	ALJ58831.1	hypothetical protein	EC3.1.1.11		BcellWH2:15	BcellWH2:16
BcellWH2_02914	2.44	6.8	9.00028e-06	0.00142564	ALJ60153.1	hypothetical protein	Unknown		BcellWH2:54	BcellWH2:63
BcellWH2_04602	1.11	8.81	1.45411e-05	0.00215936	ALJ61817.1	putative zinc-type alcohol dehydrogenase-like protein YjmD	EC1.1.1.-
BcellWH2_03181	1.41	8.06	1.75642e-05	0.00252924	ALJ60418.1	Alpha-xylosidase	EC3.2.1.177	GH31	BcellWH2:65	BcellWH2:74
BcellWH2_00925	-2.18	7.27	1.90976e-05	0.00266917	ALJ58187.1	SusD family protein	NOT DEFINED		BcellWH2:5	BcellWH2:5
BcellWH2_02616	-1.27	8.14	2.0573e-05	0.00271564	ALJ59855.1	Peptidase S46	Unknown
BcellWH2_04950	-1.5	7.94	2.67574e-05	0.00317878	ALJ62159.1	Pyridoxine kinase	EC2.7.1.35
BcellWH2_02137	1.09	8.55	2.31193e-05	0.00289113	ALJ59380.1	hypothetical protein	Unknown
BcellWH2_04325	1.09	8.51	2.37353e-05	0.00289205	ALJ61542.1	SusD family protein	NOT DEFINED		BcellWH2:87	BcellWH2:104
BcellWH2_04287	1.28	7.87	2.83973e-05	0.00329132	ALJ61504.1	hypothetical protein	Unknown
BcellWH2_01162	-0.82	9.36	2.00658e-05	0.00271564	ALJ58424.1	Beta-galactosidase	EC3.2.1.23	GH2	BcellWH2:11	BcellWH2:11
BcellWH2_04319	1.33	8.3	3.20707e-05	0.00362857	ALJ61536.1	Endo-1,4-beta-xylanase A precursor	EC3.2.1.37|EC3.2.1.55	GH10-GH43_12	BcellWH2:87
BcellWH2_04051	-0.76	9.78	2.25927e-05	0.00289113	ALJ61271.1	Sensor histidine kinase TodS	Unknown		BcellWH2:83	BcellWH2:95
BcellWH2_00880	1.33	7.68	3.94477e-05	0.00426035	ALJ58142.1	Outer membrane protein 40 precursor	NOT DEFINED
BcellWH2_05449	-5.91	5.05	3.75845e-06	0.000714406	ALJ62648.1	Uronate isomerase	EC5.3.1.12
BcellWH2_02874	1.73	7.55	5.13303e-05	0.0050817	ALJ60113.1	hypothetical protein	Unknown
BcellWH2_02727	-1.1	8.27	4.58809e-05	0.00473969	ALJ59966.1	O-Glycosyl hydrolase family 30	EC3.2.1.136	GH30_4	BcellWH2:49	BcellWH2:58
BcellWH2_02691	1.54	7.4	5.39378e-05	0.00519382	ALJ59930.1	Ribokinase	EC2.7.1.15			BcellWH2:55
BcellWH2_02022	1.03	8.68	4.44334e-05	0.00469217	ALJ59267.1	Inner membrane symporter YicJ	NOT DEFINED		BcellWH2:28	BcellWH2:32
BcellWH2_03247	-1.51	7.42	6.19094e-05	0.0057685	ALJ60481.1	hypothetical protein	Unknown
BcellWH2_02056	0.88	9.14	4.94491e-05	0.00499962	ALJ59301.1	hypothetical protein	Unknown
BcellWH2_04091	0.96	9.01	5.46488e-05	0.00519382	ALJ61311.1	TonB-dependent Receptor Plug Domain protein	NOT DEFINED		BcellWH2:84	BcellWH2:96
BcellWH2_04244	-5.9	4.35	9.6599e-06	0.00148077	ALJ61461.1	D-inositol 3-phosphate glycosyltransferase	EC2.4.1.11	GT4
BcellWH2_04234	2.09	7.13	9.27769e-05	0.00722747	ALJ61451.1	Unsaturated rhamnogalacturonyl hydrolase YteR	EC3.2.1.172	GH105
BcellWH2_00927	-1.32	8.22	8.08222e-05	0.00678049	ALJ58189.1	Intracellular endo-alpha-(1->5)-L-arabinanase	EC3.2.1.99	GH43_4	BcellWH2:5	BcellWH2:5
BcellWH2_03690	-1.22	8.02	8.07566e-05	0.00678049	ALJ60913.1	Phage integrase family protein	Unknown
BcellWH2_00505	1.1	8.1	8.30584e-05	0.00680506	ALJ57773.1	hypothetical protein	Unknown
BcellWH2_03395	0.95	8.63	8.13316e-05	0.00678049	ALJ60628.1	putative peptidase	EC3.4.11.9
BcellWH2_00978	1.52	7.77	0.000114	0.00820801	ALJ58240.1	UDP-N-acetyl-D-glucosamine 6-dehydrogenase	EC1.1.1.-
BcellWH2_01536	1.63	7.23	0.000119135	0.00844971	ALJ58790.1	hypothetical protein	Unknown
BcellWH2_02843	-1.07	9.61	7.24424e-05	0.00640004	ALJ60082.1	Beta-xylosidase	EC3.2.1.55	GH43_10
BcellWH2_01120	-1.05	8.5	9.91367e-05	0.00757148	ALJ58382.1	hypothetical protein	EC4.2.2.2	PL1_2	BcellWH2:9	BcellWH2:9
BcellWH2_05076	-5.74	7.8	0.000100379	0.00757148	ALJ62284.1	UDP-N-acetyl-alpha-D-glucosamine C6 dehydratase	NOT DEFINED
BcellWH2_02316	0.73	9.76	7.27277e-05	0.00640004	ALJ59556.1	Sensor histidine kinase TmoS	Unknown		BcellWH2:38	BcellWH2:42
BcellWH2_02363	0.79	9.38	8.96888e-05	0.00710335	ALJ59603.1	TonB-dependent Receptor Plug Domain protein	Unknown		BcellWH2:41	BcellWH2:46
BcellWH2_02087	-4.07	5.59	7.05279e-05	0.00640004	ALJ59330.1	Rhamnulokinase	EC2.7.1.5			BcellWH2:33
BcellWH2_01408	3.37	5.99	0.000110807	0.00810082	ALJ58669.1	NAD-specific glutamate dehydrogenase	EC1.4.1.4
BcellWH2_05332	-0.7	9.9	8.64827e-05	0.00696552	ALJ62534.1	hypothetical protein	Unknown
BcellWH2_03166	-0.9	8.68	0.000134681	0.00927231	ALJ60403.1	SusD family protein	NOT DEFINED		BcellWH2:64	BcellWH2:73
BcellWH2_02346	0.98	8.66	0.000136587	0.00927231	ALJ59586.1	Neopullulanase	EC3.2.1.135	GH13	BcellWH2:40	BcellWH2:44
BcellWH2_00928	-5.46	5.09	3.65802e-05	0.00404254	ALJ58190.1	Aldose 1-epimerase precursor	EC5.1.3.3		BcellWH2:5	BcellWH2:5
BcellWH2_04820	-1.18	8.49	0.00015143	0.00999438	ALJ62029.1	Signal transduction histidine-protein kinase BarA	EC2.1.1.80:EC3.1.1.61
BcellWH2_02297	0.74	9.78	0.000103676	0.00769795	ALJ59537.1	TonB dependent receptor	Unknown
BcellWH2_01875	1.28	7.53	0.000200246	0.0123035	ALJ59128.1	hypothetical protein	Unknown
BcellWH2_02753	1.09	8.42	0.000163726	0.0106579	ALJ59992.1	hypothetical protein	Unknown
BcellWH2_04014	1.59	7.16	0.000217653	0.0126132	ALJ61234.1	hypothetical protein	Unknown
BcellWH2_04067	1.05	8.36	0.000179295	0.0115137	ALJ61287.1	Prolyl tripeptidyl peptidase precursor	EC3.4.14.5
BcellWH2_05320	1.14	7.94	0.000211702	0.0124822	ALJ62522.1	ISXO2-like transposase domain protein	Unknown
BcellWH2_05554	2.42	6.02	0.000230037	0.0127109	ALJ62752.1	hypothetical protein	Unknown
BcellWH2_01355	1.15	8.16	0.000203957	0.0123035	ALJ58616.1	Curved DNA-binding protein	NOT DEFINED
BcellWH2_05248	1.38	7.59	0.000235784	0.0128787	ALJ62450.1	Aminodeoxychorismate synthase component 2	EC4.1.3.27
BcellWH2_00288	-1.77	7.01	0.000262347	0.0138519	ALJ57564.1	hypothetical protein	Unknown
BcellWH2_03116	-1.55	6.95	0.000266742	0.0139292	ALJ60353.1	flavin mononucleotide phosphatase	NOT DEFINED
BcellWH2_05041	1.11	7.91	0.000228621	0.0127109	ALJ62250.1	Right origin-binding protein	NOT DEFINED
BcellWH2_02127	1.25	8.09	0.000226875	0.0127109	ALJ59370.1	hypothetical protein	Unknown
BcellWH2_02823	0.92	8.56	0.000204541	0.0123035	ALJ60062.1	hypothetical protein	Unknown		BcellWH2:52	BcellWH2:61
BcellWH2_04458	2.06	6.46	0.000294261	0.0147192	ALJ61675.1	N-acetylmuramoyl-L-alanine amidase	EC3.5.1.28
BcellWH2_02959	-0.61	10.08	0.000145929	0.009767	ALJ60197.1	hypothetical protein	EC3.4.21.96
BcellWH2_01169	-1.17	9.59	0.000183748	0.0116423	ALJ58431.1	Vitamin B12 transporter BtuB	Unknown		BcellWH2:11	BcellWH2:12
BcellWH2_02782	1.84	6.46	0.000370071	0.017241	ALJ60021.1	LemA family protein	NOT DEFINED
BcellWH2_03498	1.4	7.24	0.00035986	0.0171005	ALJ60722.1	transport protein TonB	NOT DEFINED
BcellWH2_00268	3.55	5.45	0.000251328	0.0134192	ALJ57544.1	hypothetical protein
BcellWH2_04973	-1.98	6.31	0.000399516	0.0179104	ALJ62182.1	dTDP-4-dehydrorhamnose 3,5-epimerase	EC5.1.3.13
BcellWH2_02515	-1.51	6.9	0.000423243	0.018508	ALJ59754.1	hypothetical protein	Unknown
BcellWH2_00926	-2.56	6.22	0.000367555	0.017241	ALJ58188.1	hypothetical protein	Unknown		BcellWH2:5	BcellWH2:5
BcellWH2_05224	-2.15	6.34	0.000433409	0.0187233	ALJ62426.1	putative AAA-ATPase	Unknown
BcellWH2_05159	0.66	9.57	0.000220906	0.0126475	ALJ62367.1	MMPL family protein	NOT DEFINED
BcellWH2_02998	0.8	9.89	0.000212765	0.0124822	ALJ60236.1	Sensor histidine kinase TmoS	Unknown		BcellWH2:58	BcellWH2:67
BcellWH2_02642	0.66	9.43	0.000239198	0.0129167	ALJ59881.1	TonB dependent receptor	NOT DEFINED		BcellWH2:47	BcellWH2:53
BcellWH2_02725	0.66	9.39	0.000291612	0.0147192	ALJ59964.1	TonB dependent receptor	NOT DEFINED		BcellWH2:49	BcellWH2:58
BcellWH2_00985	1.36	7.09	0.000540248	0.0217564	ALJ58247.1	putative AAA-ATPase	Unknown
BcellWH2_01857	1.03	8.43	0.000390854	0.0176889	ALJ59110.1	hypothetical protein	Unknown
BcellWH2_04506	-0.81	8.9	0.000349923	0.0167963	ALJ61722.1	hypothetical protein	Unknown
BcellWH2_04350	1.33	7.68	0.000556406	0.0222188	ALJ61567.1	hypothetical protein	Unknown
BcellWH2_00670	-1	8.33	0.000424531	0.018508	ALJ57937.1	Inner membrane protein YhiM	Unknown
BcellWH2_01790	-1.44	6.86	0.00057362	0.022343	ALJ59043.1	Polysaccharide pyruvyl transferase	Unknown
BcellWH2_03346	-3.19	6.46	0.000389531	0.0176889	ALJ60579.1	Alpha-xylosidase	EC3.2.1.177	GH31
BcellWH2_04041	-2.01	6.87	0.000616482	0.0236252	ALJ61261.1	Hexuronate transporter	NOT DEFINED
BcellWH2_05135	0.74	9.48	0.000326304	0.0159855	ALJ62343.1	Glycyl-glycine endopeptidase ALE-1 precursor	EC3.4.-.-
BcellWH2_02979	0.73	9.33	0.00033203	0.0161001	ALJ60217.1	TonB dependent receptor	NOT DEFINED		BcellWH2:56	BcellWH2:65
BcellWH2_05073	1.6	6.64	0.000657118	0.0245876	ALJ62281.1	Enamine/imine deaminase	EC3.5.99.10
BcellWH2_01513	1.2	8.29	0.00050073	0.020691	ALJ58768.1	Periplasmic binding protein	NOT DEFINED
BcellWH2_04783	0.92	8.14	0.000488578	0.0204437	ALJ61994.1	Sensory/regulatory protein RpfC	EC2.7.13.3
BcellWH2_04998	-1.54	7.63	0.000564695	0.022343	ALJ62207.1	VIT family protein	Unknown
BcellWH2_00754	-7.95	5.93	0.000190178	0.0118911	ALJ58018.1	Polysialic acid transport protein KpsD precursor	NOT DEFINED
BcellWH2_04507	-4.38	7.76	0.000702895	0.0256935	ALJ61723.1	hypothetical protein	Unknown
BcellWH2_04194	0.94	8.2	0.000533831	0.0216817	ALJ61413.1	Tyrosine recombinase XerD	Unknown
BcellWH2_02633	1.23	7.44	0.000648705	0.0244654	ALJ59872.1	Glycosyl hydrolases family 2, sugar binding domain	EC3.1.1.53
BcellWH2_02913	1.02	8.65	0.000512746	0.0210049	ALJ60152.1	Intracellular endo-alpha-(1->5)-L-arabinanase	EC3.2.1.99	GH43_7-CBM13	BcellWH2:54	BcellWH2:63
BcellWH2_01377	0.93	8.58	0.000490442	0.0204437	ALJ58638.1	Methionine gamma-lyase	EC2.5.1.49
BcellWH2_04804	1.07	8.12	0.000568988	0.022343	ALJ62013.1	Sodium-dependent dicarboxylate transporter SdcS	Unknown
BcellWH2_02182	-2.43	5.51	0.000667539	0.0247573	ALJ59423.1	NigD-like protein	Unknown
BcellWH2_02339	1.58	7.14	0.000744547	0.0260154	ALJ59579.1	ECF RNA polymerase sigma factor SigR	NOT DEFINED		BcellWH2:40	BcellWH2:44
BcellWH2_00337	0.72	9.31	0.000420437	0.018508	ALJ57612.1	Inner membrane transport permease YbhR	NOT DEFINED
BcellWH2_03511	-0.58	9.64	0.000385782	0.0176889	ALJ60734.1	TonB-dependent Receptor Plug Domain protein	NOT DEFINED		BcellWH2:74	BcellWH2:83
BcellWH2_05437	-0.77	9.22	0.000460126	0.0196984	ALJ62636.1	Tyrosine-protein kinase ptk	EC2.7.10.-
BcellWH2_04072	0.58	10.29	0.000310702	0.0153798	ALJ61292.1	hypothetical protein
BcellWH2_02867	3.04	5.79	0.000718007	0.0260154	ALJ60106.1	hypothetical protein	Unknown
BcellWH2_03541	-1.22	7.86	0.000726038	0.0260154	ALJ60764.1	Alpha-hemolysin translocation ATP-binding protein HlyB	NOT DEFINED
BcellWH2_01700	1.32	7.41	0.000824187	0.0275812	ALJ58953.1	Aldose 1-epimerase precursor	EC5.1.3.3		BcellWH2:19	BcellWH2:23
BcellWH2_01331	1.02	8.19	0.000672072	0.0247573	ALJ58592.1	Alpha-galactosidase	EC3.2.1.22	GH36
BcellWH2_03514	0.77	8.69	0.000592828	0.0229034	ALJ60737.1	Glycosyl hydrolases family 2, sugar binding domain	Unknown	GH106	BcellWH2:74	BcellWH2:83
BcellWH2_02976	-1.64	7.38	0.000907983	0.0295571	ALJ60214.1	Extracellular exo-alpha-L-arabinofuranosidase precursor	EC3.2.1.55	GH51	BcellWH2:55	BcellWH2:64
BcellWH2_02639	-0.98	7.99	0.000764869	0.0263381	ALJ59878.1	Extracellular endo-alpha-(1->5)-L-arabinanase 1 precursor	EC3.2.1.99	GH43_3	BcellWH2:47	BcellWH2:53
BcellWH2_03213	-0.69	9.48	0.000483656	0.0204437	ALJ60449.1	tol-pal system protein YbgF	EC4.2.2.-
BcellWH2_00761	1.67	6.82	0.00102306	0.0321959	ALJ58024.1	Putative SOS response-associated peptidase YedK	Unknown
BcellWH2_04098	0.94	8.16	0.00074336	0.0260154	ALJ61318.1	SusD family protein	NOT DEFINED		BcellWH2:84	BcellWH2:97
BcellWH2_00541	-1.1	8.14	0.000762449	0.0263381	ALJ57809.1	hypothetical protein	Unknown
BcellWH2_00929	-4.98	4.16	0.00028884	0.0147192	ALJ58191.1	Sodium/glucose cotransporter	NOT DEFINED		BcellWH2:5	BcellWH2:5
BcellWH2_02812	1.35	6.94	0.00101589	0.0321833	ALJ60051.1	hypothetical protein	Unknown
BcellWH2_00836	6.22	3.15	0.000129354	0.00903954	ALJ58099.1	antitoxin HipB	NOT DEFINED
BcellWH2_01181	1.04	7.98	0.000801953	0.0272206	ALJ58443.1	SusD family protein	NOT DEFINED		BcellWH2:12	BcellWH2:13
BcellWH2_04571	1.43	7.07	0.00103597	0.0323878	ALJ61786.1	hypothetical protein
BcellWH2_00787	1.48	7.02	0.00105768	0.0326371	ALJ58050.1	hypothetical protein	Unknown
BcellWH2_02111	2.17	6.07	0.00111013	0.0338163	ALJ59354.1	hypothetical protein	Unknown
BcellWH2_03957	-1.34	6.97	0.00113354	0.0340923	ALJ61177.1	Putative glycosyltransferase EpsH	EC2.4.-.-	GT2
BcellWH2_00377	0.83	8.54	0.000778803	0.026625	ALJ57652.1	OPT oligopeptide transporter protein	Unknown
BcellWH2_01787	2.58	5.81	0.00120423	0.0355262	ALJ59040.1	GDP-mannose-dependent alpha-(1-6)-phosphatidylinositol monomannoside mannosyltransferase	EC2.4.1.11	GT4
BcellWH2_04835	0.84	8.44	0.000894745	0.0295266	ALJ62044.1	Glycosyl hydrolases family 28	Unknown	GH28	BcellWH2:90	BcellWH2:108
BcellWH2_00424	-1.42	6.8	0.00127566	0.036739	ALJ57699.1	Putative 5'(3')-deoxyribonucleotidase	EC3.1.3.5
BcellWH2_01612	1.37	6.84	0.00132223	0.0369601	ALJ58865.1	Ribonucleoside-diphosphate reductase NrdZ	EC1.17.4.1
BcellWH2_02439	0.77	8.77	0.000866368	0.0287901	ALJ59678.1	SusD family protein	NOT DEFINED		BcellWH2:43	BcellWH2:48
BcellWH2_00058	-4.13	4.37	0.0007361	0.0260154	ALJ57334.1	Flavoredoxin	Unknown
BcellWH2_03291	2.01	6.41	0.00153117	0.0404229	ALJ60525.1	putative RNA polymerase sigma factor FecI	NOT DEFINED		BcellWH2:68	BcellWH2:77
BcellWH2_03192	0.9	8.68	0.000989974	0.0315729	ALJ60429.1	hypothetical protein	Unknown
BcellWH2_00745	-0.65	9.32	0.000822362	0.0275812	ALJ58009.1	TonB dependent receptor	Unknown		BcellWH2:3	BcellWH2:3
BcellWH2_00562	-5.74	3.28	0.000279473	0.0144354	ALJ57830.1	Electron transport complex protein rnfB	NOT DEFINED
BcellWH2_02045	-1.04	7.83	0.00129419	0.036884	ALJ59290.1	Endo-1,4-beta-xylanase/feruloyl esterase precursor	EC3.2.1.37|EC3.2.1.55	GH43_12-GH10
BcellWH2_02529	-1.1	7.62	0.00147742	0.0394421	ALJ59768.1	hypothetical protein	EC4.2.2.23		BcellWH2:44
BcellWH2_02578	0.91	7.65	0.00138055	0.0373038	ALJ59817.1	hypothetical protein	Unknown
BcellWH2_04305	0.6	9.79	0.000744462	0.0260154	ALJ61522.1	Carbohydrate acetyl esterase/feruloyl esterase precursor	EC3.2.1.51	CE6-GH95	BcellWH2:87	BcellWH2:102
BcellWH2_03096	-1.39	7.34	0.00161324	0.0421214	ALJ60333.1	Glycosyl transferase family 2	Unknown	GT2
BcellWH2_01798	2.95	5.41	0.0013737	0.0373038	ALJ59051.1	hypothetical protein	Unknown
BcellWH2_00705	-0.99	8.02	0.00133632	0.0371356	ALJ57969.1	Streptogramin A acetyltransferase	EC2.3.1.79
BcellWH2_00007	-0.91	9	0.00104446	0.0324398	ALJ57284.1	hypothetical protein
BcellWH2_02557	0.94	7.97	0.00144125	0.0386939	ALJ59796.1	Thermostable beta-glucosidase B	EC3.2.1.21	GH3
BcellWH2_02700	-1.85	6.55	0.00197711	0.0497103	ALJ59939.1	Cellobiose 2-epimerase	Unknown	GH76	BcellWH2:48	BcellWH2:56
BcellWH2_01738	-0.73	8.88	0.00110691	0.0338163	ALJ58991.1	Exo-beta-D-glucosaminidase precursor	EC3.2.1.165	GH2	BcellWH2:20	BcellWH2:24
BcellWH2_03235	-0.6	9.54	0.000914343	0.0295575	ALJ60469.1	Vitamin B12 transporter BtuB	NOT DEFINED		BcellWH2:66	BcellWH2:75
BcellWH2_02055	3.87	4.58	0.00114089	0.0340975	ALJ59300.1	hypothetical protein
BcellWH2_02221	-3.81	5.61	0.00129622	0.036884	ALJ59462.1	Inner membrane protein YbaL	NOT DEFINED
BcellWH2_04092	0.6	9.65	0.000908108	0.0295571	ALJ61312.1	SusD family protein	NOT DEFINED		BcellWH2:84	BcellWH2:96
BcellWH2_02347	-0.71	8.89	0.00121365	0.0355262	ALJ59587.1	hypothetical protein	NOT DEFINED		BcellWH2:40	BcellWH2:44
BcellWH2_01293	-1.64	6.97	0.00210449	0.0520861	ALJ58554.1	Arabinogalactan endo-1,4-beta-galactosidase precursor	EC3.2.1.89	GH53	BcellWH2:13	BcellWH2:14
BcellWH2_03883	4.12	4.55	0.00116366	0.0345608	ALJ61104.1	Bacterial DNA-binding protein	Unknown
BcellWH2_01721	0.84	8.64	0.00130658	0.0369575	ALJ58974.1	hypothetical protein	Unknown	CBM62
BcellWH2_05496	3.17	5.22	0.00172878	0.0444063	ALJ62694.1	hypothetical protein	Unknown
BcellWH2_03792	-2.12	5.5	0.00219342	0.0534519	ALJ61014.1	hypothetical protein	EC3.5.2.6
BcellWH2_05133	1.76	6.63	0.00225013	0.0540842	ALJ62341.1	putative transporter	NOT DEFINED
BcellWH2_04374	-5.53	5.32	0.00111836	0.03385	ALJ61591.1	Tyrocidine synthase 3	EC6.1.1.13
BcellWH2_05484	0.78	8.62	0.00137514	0.0373038	ALJ62682.1	D-xylose-proton symporter	NOT DEFINED
BcellWH2_05525	-1.37	6.42	0.00234599	0.0551889	ALJ62723.1	hypothetical protein	NOT DEFINED
BcellWH2_02207	0.64	9.78	0.000960955	0.0308544	ALJ59448.1	protease TldD	NOT DEFINED
BcellWH2_00405	1.6	6.96	0.00238248	0.0554977	ALJ57680.1	hypothetical protein	Unknown
BcellWH2_02972	-0.62	9.14	0.0012186	0.0355262	ALJ60210.1	TonB dependent receptor	Unknown		BcellWH2:55	BcellWH2:64
BcellWH2_05144	1.21	7.16	0.00215065	0.0526798	ALJ62352.1	Histidine kinase	EC2.7.13.3
BcellWH2_04859	-1.1	7.67	0.00197602	0.0497103	ALJ62068.1	Alginate lyase	Unknown		BcellWH2:92	BcellWH2:110
BcellWH2_05412	2.91	5.52	0.00230595	0.0545579	ALJ62612.1	putative ABC transporter ATP-binding protein YxlF	NOT DEFINED
BcellWH2_05087	1.08	7.74	0.00200953	0.0502595	ALJ62295.1	Phosphate-binding protein PstS precursor	NOT DEFINED
BcellWH2_03362	-3.86	6.22	0.00257936	0.0580905	ALJ60595.1	hypothetical protein	Unknown
BcellWH2_03017	0.83	8.45	0.00167969	0.0436168	ALJ60255.1	hypothetical protein	Unknown
BcellWH2_03626	1.95	6.3	0.00286424	0.0610352	ALJ60849.1	hypothetical protein	Unknown		BcellWH2:76
BcellWH2_05197	-3.72	4.27	0.00156727	0.0411474	ALJ62400.1	V-type sodium ATPase subunit K	NOT DEFINED
BcellWH2_05287	2.06	6.14	0.00293882	0.0615211	ALJ62489.1	putative ABC transporter ATP-binding protein YbhF	NOT DEFINED
BcellWH2_04301	1.26	7.29	0.00250493	0.0575045	ALJ61518.1	Endo-beta-1,4-xylanase Xyn10C precursor	EC3.2.1.8	GH10	BcellWH2:87	BcellWH2:102
BcellWH2_04511	1.22	6.82	0.00276518	0.0594576	ALJ61727.1	HTH-type transcriptional activator Btr	NOT DEFINED
BcellWH2_00749	1.16	7.69	0.00230769	0.0545579	ALJ58013.1	hypothetical protein	Unknown		BcellWH2:3	BcellWH2:3
BcellWH2_00193	1.05	7.6	0.00241595	0.0557311	ALJ57469.1	hypothetical protein		GT4
BcellWH2_04528	1.31	7.18	0.00261659	0.0585422	ALJ61744.1	hypothetical protein	Unknown
BcellWH2_02161	-1.01	7.79	0.0023662	0.05539	ALJ59402.1	Xylosidase/arabinosidase	EC3.2.1.55	GH43_2	BcellWH2:31	BcellWH2:35
BcellWH2_05401	-0.65	9.28	0.00150695	0.0400057	ALJ62601.1	FtsX-like permease family protein	NOT DEFINED
BcellWH2_04856	1.58	6.3	0.00318962	0.0640377	ALJ62065.1	putative RNA polymerase sigma factor FecI	NOT DEFINED		BcellWH2:91	BcellWH2:109
BcellWH2_04255	0.8	8.7	0.00183395	0.0468545	ALJ61472.1	Glycosyl hydrolase family 92	Unknown	GH92		BcellWH2:101
BcellWH2_02717	0.56	9.7	0.00132122	0.0369601	ALJ59956.1	Sensor histidine kinase TodS	Unknown		BcellWH2:49	BcellWH2:57
BcellWH2_04478	1.32	7.08	0.00311041	0.0636011	ALJ61695.1	Coenzyme PQQ synthesis protein D	Unknown
BcellWH2_04922	-1.22	7.25	0.00288861	0.0610675	ALJ62131.1	Type-1 restriction enzyme R protein	EC3.1.21.3
BcellWH2_02808	-3.62	4.58	0.00209913	0.0520861	ALJ60047.1	Flavin reductase like domain protein	Unknown
BcellWH2_03591	-1.27	7.09	0.00314526	0.0636011	ALJ60814.1	hypothetical protein	Unknown
BcellWH2_04837	-0.83	8.16	0.00226489	0.0540842	ALJ62046.1	hypothetical protein	Unknown		BcellWH2:90	BcellWH2:108
BcellWH2_01639	-0.54	9.89	0.00126128	0.0365464	ALJ58892.1	Ferrienterobactin receptor precursor	Unknown		BcellWH2:16	BcellWH2:17
BcellWH2_00592	1.04	7.81	0.00253079	0.0575422	ALJ57860.1	putative type I restriction enzymeP M protein	EC2.1.1.72
BcellWH2_01653	-1.14	7.29	0.00312674	0.0636011	ALJ58906.1	Unsaturated rhamnogalacturonyl hydrolase YteR	EC3.2.1.172	GH105	BcellWH2:17	BcellWH2:18
BcellWH2_00561	-4.55	4.44	0.00195173	0.0495969	ALJ57829.1	Electron transport complex protein RnfC	NOT DEFINED
BcellWH2_05023	3.57	5.19	0.0031938	0.0640377	ALJ62232.1	hypothetical protein	Unknown
BcellWH2_00279	-1.08	7.48	0.00292962	0.0615211	ALJ57555.1	PP2C-family Ser/Thr phosphatase	EC3.1.3.16
BcellWH2_02930	-1.67	6.18	0.00377024	0.069995	ALJ60168.1	Caspase domain protein	NOT DEFINED
BcellWH2_03107	0.99	7.74	0.00271917	0.0594576	ALJ60344.1	hypothetical protein	NOT DEFINED
BcellWH2_02191	0.93	7.74	0.00274513	0.0594576	ALJ59432.1	6-aminohexanoate-dimer hydrolase	EC3.5.1.105
BcellWH2_00895	-3.35	5.06	0.00269279	0.0594576	ALJ58157.1	Sulfate adenylyltransferase subunit 1	EC2.7.7.4
BcellWH2_04685	0.96	7.84	0.00271086	0.0594576	ALJ61899.1	Leucine carboxyl methyltransferase	EC2.1.1.-
BcellWH2_01918	1.41	6.37	0.00379109	0.069995	ALJ59169.1	Sporulation kinase D	EC2.7.13.3
BcellWH2_02989	-3.7	4.52	0.00262405	0.0585422	ALJ60227.1	fec operon regulator FecR	Unknown		BcellWH2:57	BcellWH2:66
BcellWH2_02767	0.97	7.58	0.00307213	0.0634729	ALJ60006.1	MORN repeat variant	NOT DEFINED
BcellWH2_02402	0.64	8.81	0.00220487	0.0534569	ALJ59641.1	Vitamin B12 transporter BtuB	NOT DEFINED		BcellWH2:42	BcellWH2:47
BcellWH2_03774	3.24	4.83	0.00330804	0.065098	ALJ60996.1	hypothetical protein	Unknown
BcellWH2_01826	-0.7	8.26	0.00264741	0.0587873	ALJ59079.1	hypothetical protein	Unknown		BcellWH2:21	BcellWH2:25
BcellWH2_02956	1.47	6.45	0.00423689	0.0749509	ALJ60194.1	PAP2 superfamily protein	Unknown
BcellWH2_03237	0.84	7.56	0.00331095	0.065098	ALJ60471.1	hypothetical protein	EC3.2.1.99		BcellWH2:66	BcellWH2:75
BcellWH2_03200	6.59	2.31	0.000641378	0.0243826	ALJ60437.1	2-oxoglutarate oxidoreductase subunit KorB	EC1.2.7.3:EC1.2.7.11
BcellWH2_02936	-2.53	5.48	0.00435727	0.0756422	ALJ60174.1	hypothetical protein	Unknown
BcellWH2_03977	-2.02	5.99	0.00461455	0.0769416	ALJ61197.1	Gene 25-like lysozyme	NOT DEFINED
BcellWH2_02724	0.86	8.02	0.00302196	0.0627089	ALJ59963.1	hypothetical protein	Unknown		BcellWH2:49	BcellWH2:58
BcellWH2_01470	-3.04	5.06	0.00380023	0.069995	ALJ58731.1	2-isopropylmalate synthase	EC2.3.3.13
BcellWH2_00199	-1.51	6.61	0.00446569	0.0757891	ALJ57475.1	UDP-N-acetyl-D-glucosamine 6-dehydrogenase	EC1.1.1.-
BcellWH2_04045	3.74	4.52	0.00323707	0.0646327	ALJ61265.1	Rhamnogalacturonan acetylesterase RhgT	EC3.1.1.11	CE12-CE8	BcellWH2:83
BcellWH2_03016	0.78	8.88	0.00239873	0.0556036	ALJ60254.1	Miniconductance mechanosensitive channel MscM precursor	NOT DEFINED
BcellWH2_01277	1.36	7.01	0.00413104	0.0741163	ALJ58538.1	Thermolabile glutaminase	EC3.5.1.2
BcellWH2_03161	0.89	8.66	0.0025675	0.0580905	ALJ60398.1	Heparinase II/III-like protein	EC4.2.2.26	PL17	BcellWH2:64	BcellWH2:73
BcellWH2_02602	0.68	9.22	0.0021314	0.0524789	ALJ59841.1	RHS Repeat protein	NOT DEFINED
BcellWH2_03384	-1.28	7.1	0.00413317	0.0741163	ALJ60617.1	hypothetical protein	Unknown
BcellWH2_02359	1.11	7.47	0.00379122	0.069995	ALJ59599.1	hypothetical protein	EC3.2.1.81	GH50	BcellWH2:41	BcellWH2:46
BcellWH2_01883	1.62	6.37	0.00483753	0.0787259	ALJ59134.1	hypothetical protein	Unknown
BcellWH2_02174	-1.03	7.67	0.00364346	0.0687052	ALJ59415.1	Integrase core domain protein	Unknown
BcellWH2_03865	0.92	7.81	0.00331518	0.065098	ALJ61087.1	Outer membrane efflux protein	NOT DEFINED
BcellWH2_04662	0.68	8.52	0.00272961	0.0594576	ALJ61876.1	Divergent AAA domain protein
BcellWH2_01490	-3.62	4.84	0.00337345	0.0659359	ALJ58745.1	hypothetical protein	Unknown
BcellWH2_04040	-0.62	9.22	0.00225838	0.0540842	ALJ61260.1	hypothetical protein	EC3.6.4.12
BcellWH2_04880	-0.8	8.29	0.00301745	0.0627089	ALJ62089.1	Cytochrome c	Unknown
BcellWH2_03921	-1.05	8.05	0.00353204	0.0682287	ALJ61142.1	hypothetical protein	Unknown
BcellWH2_00877	1.76	5.99	0.00505474	0.080067	ALJ58139.1	lipoprotein NlpI	EC2.7.11.1
BcellWH2_02307	2.05	5.68	0.00507271	0.0800847	ALJ59547.1	hypothetical protein	Unknown
BcellWH2_02436	1.3	6.9	0.00441161	0.0757891	ALJ59675.1	Neopullulanase	EC3.2.1.1	GH13	BcellWH2:43	BcellWH2:48
BcellWH2_05256	-5.62	2.39	0.00138162	0.0373038	ALJ62458.1	Nitrogen regulatory protein P-II	NOT DEFINED
BcellWH2_01699	-0.46	10.47	0.00137382	0.0373038	ALJ58952.1	Sensor histidine kinase TmoS	Unknown		BcellWH2:19	BcellWH2:23
BcellWH2_00221	2.18	5.69	0.00517339	0.0808682	ALJ57497.1	hypothetical protein	Unknown
BcellWH2_01687	-0.78	8.21	0.00331103	0.065098	ALJ58940.1	Sensor histidine kinase YpdA	EC2.7.13.3
BcellWH2_02312	0.73	8.68	0.00289145	0.0610675	ALJ59552.1	Xylan 1,4-beta-xylosidase precursor	EC3.2.1.21	GH3	BcellWH2:38	BcellWH2:42
BcellWH2_03234	-0.74	8.01	0.00355674	0.0683474	ALJ60468.1	Periplasmic beta-glucosidase precursor	EC3.2.1.21	GH3	BcellWH2:66	BcellWH2:75
BcellWH2_03831	0.91	7.99	0.00362725	0.068672	ALJ61053.1	DNA-damage-inducible protein F	NOT DEFINED
BcellWH2_01174	2.07	6.22	0.00563312	0.0847108	ALJ58436.1	hypothetical protein			BcellWH2:12	BcellWH2:13
BcellWH2_05487	-1.5	6.4	0.00559594	0.0844187	ALJ62685.1	NUDIX domain protein	EC3.6.1.55
BcellWH2_03551	0.76	8.17	0.00340039	0.0659536	ALJ60774.1	Transglutaminase-like superfamily protein	Unknown
BcellWH2_03073	4.03	3.89	0.00314441	0.0636011	ALJ60311.1	hypothetical protein
BcellWH2_00072	1.1	6.99	0.00471282	0.0777616	ALJ57348.1	Alkaline phosphatase synthesis sensor protein PhoR	EC2.7.13.3
BcellWH2_05201	-1.74	6.73	0.00548198	0.0834948	ALJ62404.1	hypothetical protein	Unknown
BcellWH2_04094	0.99	7.94	0.00361817	0.068672	ALJ61314.1	Xylan 1,4-beta-xylosidase precursor	EC3.2.1.21	GH3	BcellWH2:84	BcellWH2:96
BcellWH2_03719	2.24	5.48	0.00576222	0.0850374	ALJ60941.1	Phosphoribosyl transferase domain protein	EC3.6.4.12
BcellWH2_02558	1	7.56	0.0042428	0.0749509	ALJ59797.1	Endoglucanase C307 precursor	EC3.2.1.4	GH5_46
BcellWH2_04577	1.08	7.1	0.00479382	0.0785525	ALJ61792.1	Ribosomal-protein-serine acetyltransferase	EC2.3.1.-
BcellWH2_00161	1.69	6.07	0.00595771	0.0868404	ALJ57437.1	DNA topoisomerase 3	EC5.99.1.2
BcellWH2_02599	3.79	4.58	0.00359504	0.0686089	ALJ59838.1	hypothetical protein	Unknown
BcellWH2_02712	4.88	3.77	0.00275504	0.0594576	ALJ59951.1	Toxin YoeB	EC3.1.-.-
BcellWH2_02865	-0.79	8.31	0.0036614	0.0687706	ALJ60104.1	D-alanyl-D-alanine carboxypeptidase precursor	EC3.4.16.4:EC3.4.21.-
BcellWH2_00397	-2.68	4.96	0.00544824	0.0833982	ALJ57672.1	transcriptional activator RfaH	NOT DEFINED
BcellWH2_02535	-2.01	6.28	0.00617439	0.0882276	ALJ59774.1	WbqC-like protein family protein	Unknown
BcellWH2_03730	2	5.51	0.00620259	0.0882288	ALJ60952.1	hypothetical protein	Unknown
BcellWH2_00326	-3.28	4.16	0.0049754	0.0798754	ALJ57601.1	Bifunctional adenosylcobalamin biosynthesis protein CobP	EC2.7.1.156:EC2.7.7.62
BcellWH2_03485	-0.83	8.1	0.0039105	0.071198	ALJ60714.1	Alpha-galactosidase	EC3.2.1.22	GH36	BcellWH2:73	BcellWH2:82
BcellWH2_01164	0.55	9.38	0.00251729	0.0575104	ALJ58426.1	TonB-dependent Receptor Plug Domain protein	NOT DEFINED		BcellWH2:11	BcellWH2:11
BcellWH2_04775	-0.94	7.68	0.00441857	0.0757891	ALJ61986.1	Zinc-transporting ATPase	EC3.6.3.3:EC3.6.3.5
BcellWH2_03120	1.05	7.87	0.00415706	0.0742645	ALJ60357.1	succinyl-CoA synthetase subunit alpha	NOT DEFINED
BcellWH2_01862	-0.63	8.77	0.00311513	0.0636011	ALJ59115.1	SusD family protein	NOT DEFINED		BcellWH2:23	BcellWH2:27
BcellWH2_01630	-0.87	7.78	0.00433237	0.0756422	ALJ58883.1	Putative glutamine amidotransferase	NOT DEFINED
BcellWH2_05046	-0.93	7.25	0.00501688	0.080067	ALJ62255.1	hypothetical protein	Unknown
BcellWH2_05119	1.47	6.33	0.00618262	0.0882276	ALJ62327.1	Ribosomal RNA large subunit methyltransferase H	EC2.1.1.177
BcellWH2_04295	-0.9	7.72	0.0044637	0.0757891	ALJ61512.1	Glycosyl hydrolases family 2, sugar binding domain	EC3.1.1.53		BcellWH2:87
BcellWH2_03953	0.79	8.35	0.00388548	0.0710147	ALJ61173.1	hypothetical protein	Unknown
BcellWH2_00589	-2.64	5.43	0.0062958	0.0883065	ALJ57857.1	Iron-binding zinc finger CDGSH type	NOT DEFINED
BcellWH2_02500	1.04	7.23	0.00513998	0.0806112	ALJ59739.1	Anaerobic sulfatase-maturating enzyme	NOT DEFINED
BcellWH2_02855	2.64	5.09	0.00573288	0.0850374	ALJ60094.1	Transcriptional regulatory protein YehT	NOT DEFINED
BcellWH2_01230	-1.88	6.06	0.0067885	0.093776	ALJ58492.1	hypothetical protein	Unknown
BcellWH2_01168	0.97	7.47	0.0049203	0.0792585	ALJ58430.1	TonB-dependent Receptor Plug Domain protein	NOT DEFINED		BcellWH2:11	BcellWH2:11
BcellWH2_05205	0.82	8.28	0.00397278	0.071782	ALJ62408.1	Anaerobic ribonucleoside-triphosphate reductase	EC1.1.98.6
BcellWH2_05221	-1.1	8.34	0.00436152	0.0756422	ALJ62423.1	Putative pyruvyl transferase EpsO	EC2.-.-.-
BcellWH2_05148	0.72	8.72	0.0033856	0.0659359	ALJ62356.1	Sensor protein EvgS precursor	EC2.7.13.3
BcellWH2_02485	0.96	7.26	0.00529704	0.0817258	ALJ59724.1	hypothetical protein	Unknown
BcellWH2_05091	-0.88	8.18	0.00443117	0.0757891	ALJ62299.1	hypothetical protein	NOT DEFINED
BcellWH2_02283	-0.68	8.59	0.00356695	0.0683474	ALJ59523.1	Bacterial alpha-L-rhamnosidase	EC3.2.1.40	GH78	BcellWH2:36
BcellWH2_00283	1.22	6.89	0.00605913	0.0872515	ALJ57559.1	hypothetical protein
BcellWH2_02810	0.79	8.53	0.00385328	0.070698	ALJ60049.1	hypothetical protein	Unknown
BcellWH2_01806	1.96	6.66	0.00710366	0.0972813	ALJ59059.1	hypothetical protein	NOT DEFINED
BcellWH2_04086	0.77	7.96	0.00458758	0.0768603	ALJ61306.1	Cystathionine beta-lyase PatB	EC4.4.1.8
BcellWH2_02265	-0.96	7.69	0.00511493	0.0804839	ALJ59506.1	hypothetical protein	Unknown
BcellWH2_02911	0.87	8.15	0.00443997	0.0757891	ALJ60150.1	SusD family protein	NOT DEFINED		BcellWH2:54	BcellWH2:63
BcellWH2_04937	-0.64	8.83	0.00368427	0.0689278	ALJ62146.1	Bacterial alpha-L-rhamnosidase	EC3.2.1.40	GH78
BcellWH2_01214	-0.93	8.3	0.00422251	0.0749509	ALJ58476.1	Chondroitinase-B precursor	EC4.2.2.3	PL6
BcellWH2_05324	0.8	8.04	0.0045935	0.0768603	ALJ62526.1	Long-chain-fatty-acid--CoA ligase FadD15	EC6.2.1.3
BcellWH2_04714	1.86	5.64	0.00762976	0.10242	ALJ61927.1	RteC protein	Unknown
BcellWH2_04371	-5.41	5.62	0.00597576	0.0868404	ALJ61588.1	Glycosyl transferases group 1	EC2.4.-.-	GT4
BcellWH2_04164	1.08	6.97	0.00628964	0.0883065	ALJ61384.1	Free methionine-R-sulfoxide reductase	EC1.8.4.14
BcellWH2_00241	-1.46	6.51	0.00717568	0.0977044	ALJ57517.1	Type IV secretion system protein virB4	NOT DEFINED
BcellWH2_03534	1.25	6.9	0.00660118	0.0919906	ALJ60757.1	hypothetical protein	Unknown
BcellWH2_05101	2.29	5.2	0.00756457	0.101832	ALJ62309.1	hypothetical protein	Unknown
BcellWH2_03947	2.44	5.32	0.00800447	0.105953	ALJ61167.1	hypothetical protein	Unknown
BcellWH2_03773	0.94	7.49	0.00574898	0.0850374	ALJ60995.1	hypothetical protein	Unknown
BcellWH2_00560	-4.27	3.92	0.00428899	0.0754146	ALJ57828.1	Electron transport complex protein RnfD	NOT DEFINED
BcellWH2_03279	3.24	4.35	0.00622176	0.0882288	ALJ60513.1	Alpha-D-glucose-1-phosphate phosphatase YihX	EC3.1.3.10
BcellWH2_04443	-1.87	5.93	0.0082086	0.107458	ALJ61660.1	Nucleoside triphosphate pyrophosphohydrolase	EC3.6.1.66
BcellWH2_04670	4.27	4.06	0.00473148	0.0777993	ALJ61884.1	hypothetical protein	Unknown
BcellWH2_02665	0.98	7.78	0.00555246	0.0842545	ALJ59904.1	hypothetical protein	Unknown
BcellWH2_01279	5.46	3.26	0.002837	0.0607272	ALJ58540.1	Aminopeptidase S	Unknown
BcellWH2_02595	3.38	4.24	0.00665966	0.0922645	ALJ59834.1	hypothetical protein	Unknown
BcellWH2_02084	-0.9	7.78	0.00590691	0.0868404	ALJ59327.1	Rhamnulose-1-phosphate aldolase	EC4.1.2.19			BcellWH2:33
BcellWH2_01811	-0.77	7.95	0.00529585	0.0817258	ALJ59064.1	Beta-hexosaminidase	EC3.2.1.52	GH20
BcellWH2_05063	0.76	7.79	0.00556732	0.0842545	ALJ62271.1	Phosphoribosyl 1,2-cyclic phosphodiesterase	EC3.1.4.55
BcellWH2_03311	0.86	8.32	0.00489463	0.0791131	ALJ60544.1	Bacterial alpha-L-rhamnosidase	EC3.2.1.40	GH78	BcellWH2:70	BcellWH2:79
BcellWH2_01907	3.47	4.15	0.00604757	0.0872515	ALJ59158.1	hypothetical protein	Unknown
BcellWH2_02986	0.96	7.67	0.00601633	0.0871634	ALJ60224.1	putative glycerophosphoryl diester phosphodiesterase 1	EC3.1.4.46		BcellWH2:57	BcellWH2:66
BcellWH2_05276	4.78	3.39	0.00430079	0.0754146	ALJ62478.1	hypothetical protein	Unknown
BcellWH2_04765	-1.29	6.69	0.00809895	0.10661	ALJ61976.1	Signal transduction histidine-protein kinase ArlS	EC2.7.13.3
BcellWH2_04293	-0.66	8.6	0.00468285	0.0775363	ALJ61510.1	Alpha-xylosidase	EC3.2.1.177	GH31	BcellWH2:87
BcellWH2_05288	-0.8	8.14	0.00532815	0.0819398	ALJ62490.1	Inner membrane transport permease YbhS	NOT DEFINED
BcellWH2_00421	-2	6.3	0.00921699	0.116487	ALJ57696.1	Phenylacetate-coenzyme A ligase	EC6.2.1.30
BcellWH2_04185	-2.76	5.15	0.00842318	0.109031	ALJ61404.1	hypothetical protein	Unknown
BcellWH2_01211	0.8	7.98	0.00545809	0.0833982	ALJ58473.1	hypothetical protein	Unknown
BcellWH2_00299	-1.6	6.31	0.00895015	0.11372	ALJ57575.1	DnaJ domain protein	Unknown
BcellWH2_04720	-1.14	6.75	0.0082327	0.107477	ALJ61933.1	hypothetical protein	Unknown
BcellWH2_00296	1.4	6.47	0.00884314	0.112661	ALJ57572.1	hypothetical protein
BcellWH2_01125	2.73	4.79	0.00839268	0.108967	ALJ58387.1	ECF RNA polymerase sigma factor RpoE	NOT DEFINED		BcellWH2:9	BcellWH2:9
BcellWH2_05420	3.59	4.76	0.00836576	0.108915	ALJ62619.1	thiol-disulfide oxidoreductase	Unknown
BcellWH2_05400	0.64	8.7	0.00468141	0.0775363	ALJ62600.1	FtsX-like permease family protein	NOT DEFINED
BcellWH2_01611	1.43	6.3	0.00934104	0.116821	ALJ58864.1	FMN reductase [NAD(P)H]	EC1.5.1.38
BcellWH2_02024	-0.69	8.63	0.00520896	0.0811573	ALJ59269.1	Mannan endo-1,4-beta-mannosidase precursor	EC3.2.1.78	GH26	BcellWH2:28	BcellWH2:32
BcellWH2_03233	-0.61	8.71	0.00481549	0.0786365	ALJ60467.1	Two component regulator propeller	NOT DEFINED
BcellWH2_04708	5.67	1.58	0.00172606	0.0444063	ALJ61921.1	hypothetical protein	Unknown
BcellWH2_04574	0.89	7.77	0.00629964	0.0883065	ALJ61789.1	Polygalacturonase	EC3.2.1.40	GH28
BcellWH2_02460	-1.07	7.46	0.00755127	0.101832	ALJ59699.1	PGL/p-HBAD biosynthesis glycosyltransferase	EC2.4.-.-	GT2
BcellWH2_01966	-0.74	8.04	0.0062384	0.0882288	ALJ59211.1	hypothetical protein	Unknown
BcellWH2_00254	0.53	9.08	0.00453551	0.0764415	ALJ57530.1	Tyrosine recombinase XerD	NOT DEFINED
BcellWH2_05376	-3.57	3.91	0.00776909	0.103996	ALJ62576.1	hypothetical protein	Unknown
BcellWH2_02407	0.66	8.57	0.00526278	0.0817258	ALJ59646.1	Glucosidase YgjK precursor	NOT DEFINED	GH63	BcellWH2:42	BcellWH2:47
BcellWH2_02258	-0.73	8.98	0.00485492	0.0787391	ALJ59499.1	Macrolide export ATP-binding/permease protein MacB	NOT DEFINED
BcellWH2_03521	0.65	8.48	0.00566808	0.0849358	ALJ60744.1	hypothetical protein	Unknown
BcellWH2_01706	1.08	7.3	0.00817668	0.107336	ALJ58959.1	hypothetical protein	Unknown		BcellWH2:19	BcellWH2:23
BcellWH2_02970	0.69	8.34	0.00594366	0.0868404	ALJ60208.1	Ricin-type beta-trefoil lectin domain protein	EC3.2.1.99	CBM13	BcellWH2:55	BcellWH2:64
BcellWH2_03769	-1.13	6.75	0.00955813	0.118591	ALJ60991.1	hypothetical protein	Unknown
BcellWH2_02328	0.68	8.4	0.00613888	0.0881328	ALJ59568.1	SusD family protein	NOT DEFINED		BcellWH2:39	BcellWH2:43
BcellWH2_01177	-0.54	9.27	0.0045363	0.0764415	ALJ58439.1	MG2 domain protein	Unknown		BcellWH2:12	BcellWH2:13
BcellWH2_00587	-1.69	6.34	0.0113344	0.13299	ALJ57855.1	FMN reductase [NAD(P)H]	Unknown
BcellWH2_01139	1.14	6.79	0.00982118	0.120907	ALJ58401.1	fec operon regulator FecR	Unknown		BcellWH2:10
BcellWH2_00420	1.5	5.62	0.0117887	0.134664	ALJ57695.1	ACT domain protein	Unknown
BcellWH2_02239	0.67	9.02	0.00504787	0.080067	ALJ59480.1	hypothetical protein	EC3.2.1.4
BcellWH2_02123	3.31	4.08	0.00929103	0.116802	ALJ59366.1	hypothetical protein
BcellWH2_00796	-2.3	6.03	0.0123834	0.136533	ALJ58059.1	KilA-N domain protein	Unknown
BcellWH2_02246	-1.69	6.6	0.0122777	0.136533	ALJ59487.1	putative FAD-linked oxidoreductase	NOT DEFINED
BcellWH2_01376	-1.01	7.07	0.00980392	0.120907	ALJ58637.1	N-acetylmuramoyl-L-alanine amidase	EC3.5.1.28
BcellWH2_00822	-2.61	4.71	0.0117504	0.134664	ALJ58085.1	hypothetical protein	Unknown
BcellWH2_01205	-0.86	7.94	0.00790574	0.105233	ALJ58467.1	hypothetical protein	Unknown
BcellWH2_05077	-1.13	7.4	0.00938244	0.117022	ALJ62285.1	NAD-dependent dihydropyrimidine dehydrogenase subunit PreA	EC1.3.98.1
BcellWH2_03022	-0.65	8.27	0.00705752	0.0969287	ALJ60260.1	hypothetical protein	Unknown	GH141
BcellWH2_02781	0.91	7.59	0.00878937	0.112277	ALJ60020.1	hypothetical protein	Unknown
BcellWH2_04084	-0.66	8.95	0.00568384	0.0849358	ALJ61304.1	1,4-dihydroxy-2-naphthoate octaprenyltransferase	EC2.5.1.74:EC2.5.1.-
BcellWH2_04206	-1.03	8.02	0.00793717	0.105356	ALJ61423.1	Oligopeptidase A	EC3.4.15.5
BcellWH2_03275	3.52	4.45	0.0121663	0.13648	ALJ60509.1	Na+/Pi-cotransporter	NOT DEFINED
BcellWH2_00388	2.7	5.33	0.0137354	0.145046	ALJ57663.1	Acyltransferase family protein	Unknown
BcellWH2_04170	3.01	4.79	0.0129736	0.140321	ALJ61389.1	Nucleotidyltransferase domain protein	NOT DEFINED
BcellWH2_00174	-1.24	6.68	0.0121584	0.13648	ALJ57450.1	hypothetical protein	Unknown
BcellWH2_00311	1.14	6.9	0.0114435	0.133384	ALJ57587.1	hypothetical protein	Unknown
BcellWH2_05198	-1.21	6.63	0.0130018	0.140321	ALJ62401.1	glycogen synthase	EC2.4.1.1:EC2.4.1.11	GT3
BcellWH2_02177	-5.7	1.46	0.00396186	0.071782	ALJ59418.1	N-acetylornithine carbamoyltransferase	EC2.1.3.11
BcellWH2_05155	-0.67	8.57	0.00692912	0.095441	ALJ62363.1	hypothetical protein	NOT DEFINED
BcellWH2_03008	3.14	4.96	0.0138636	0.14511	ALJ60246.1	transcriptional activator FtrA	NOT DEFINED
BcellWH2_00251	2.46	5.16	0.0150437	0.150818	ALJ57527.1	hypothetical protein	Unknown
BcellWH2_00889	-5.45	7.62	0.0151328	0.151392	ALJ58151.1	hypothetical protein	Unknown
BcellWH2_05170	0.76	8.04	0.00848937	0.109031	ALJ62378.1	Macrolide export ATP-binding/permease protein MacB	NOT DEFINED
BcellWH2_03297	2.55	4.83	0.0154418	0.153363	ALJ60531.1	fec operon regulator FecR	Unknown		BcellWH2:69	BcellWH2:78
BcellWH2_03222	2.99	4.06	0.0134669	0.143405	ALJ60458.1	hypothetical protein
BcellWH2_00890	-4.15	7.46	0.0151912	0.151656	ALJ58152.1	hypothetical protein	Unknown
BcellWH2_02071	-1.63	5.64	0.0159636	0.156088	ALJ59314.1	hypothetical protein	Unknown
BcellWH2_05422	0.63	8.53	0.00755294	0.101832	ALJ62621.1	TonB dependent receptor	NOT DEFINED		BcellWH2:95	BcellWH2:113
BcellWH2_02134	3.55	4.46	0.0134895	0.143405	ALJ59377.1	hypothetical protein	Unknown
BcellWH2_02466	-2.57	5.03	0.0146721	0.148674	ALJ59705.1	putative glycosyltransferase EpsJ	EC2.4.-.-	GT2
BcellWH2_02910	-1.27	7.05	0.0140552	0.145831	ALJ60149.1	hypothetical protein	EC3.2.1.4	GH9	BcellWH2:54	BcellWH2:63
BcellWH2_04354	0.97	7.35	0.01119	0.132276	ALJ61571.1	Beta-glucanase precursor	EC3.2.1.73	GH16	BcellWH2:88	BcellWH2:105
BcellWH2_01800	3.59	4.05	0.013584	0.144088	ALJ59053.1	hypothetical protein	Unknown
BcellWH2_02677	-2.73	5.08	0.01592	0.155983	ALJ59916.1	D-tyrosyl-tRNA(Tyr) deacylase	EC3.1.-.-
BcellWH2_04329	-0.83	7.7	0.0105458	0.126566	ALJ61546.1	hypothetical protein	Unknown
BcellWH2_04077	1.33	6.35	0.0155949	0.154389	ALJ61297.1	Nitric oxide reductase	NOT DEFINED
BcellWH2_04738	-0.99	7.32	0.0117038	0.134664	ALJ61950.1	L-fucose-proton symporter	NOT DEFINED
BcellWH2_04280	-0.98	7.66	0.0102463	0.12549	ALJ61497.1	muropeptide transporter	NOT DEFINED
BcellWH2_03802	0.87	7.5	0.0109874	0.13053	ALJ61024.1	hypothetical protein			BcellWH2:81	BcellWH2:90
BcellWH2_01461	-3.57	3.57	0.0122367	0.136533	ALJ58722.1	Melibiose operon regulatory protein	NOT DEFINED
BcellWH2_05387	-0.72	8.34	0.0084717	0.109031	ALJ62587.1	Acyltransferase family protein	NOT DEFINED
BcellWH2_02323	-0.63	8.61	0.00790361	0.105233	ALJ59563.1	Exo-poly-alpha-D-galacturonosidase precursor	EC3.2.1.67	GH28	BcellWH2:39	BcellWH2:43
BcellWH2_04048	-0.74	8.1	0.00924502	0.116531	ALJ61268.1	SusD family protein	NOT DEFINED		BcellWH2:83	BcellWH2:94
BcellWH2_03987	-0.48	9.45	0.00595419	0.0868404	ALJ61207.1	Chromosome partition protein Smc	NOT DEFINED
BcellWH2_01664	0.63	8.95	0.00712643	0.0973126	ALJ58917.1	TonB-dependent Receptor Plug Domain protein	Unknown		BcellWH2:17	BcellWH2:19
BcellWH2_01939	5.56	1.73	0.00574915	0.0850374	ALJ59185.1	hypothetical protein	Unknown
BcellWH2_05218	1.08	7.07	0.0138077	0.14511	ALJ62421.1	Beta-monoglucosyldiacylglycerol synthase	EC2.4.1.336	GT2
BcellWH2_02768	-0.96	7.28	0.0123547	0.136533	ALJ60007.1	hypothetical protein	Unknown
BcellWH2_05211	-1.34	6.87	0.0141434	0.146426	ALJ62414.1	Catabolite control protein A	NOT DEFINED
BcellWH2_00647	0.95	7.57	0.0121775	0.13648	ALJ57914.1	hypothetical protein	Unknown
BcellWH2_00119	2.49	4.52	0.0176201	0.166133	ALJ57395.1	hypothetical protein	Unknown
BcellWH2_01789	-0.77	7.71	0.0109358	0.130243	ALJ59042.1	GDP-mannose-dependent alpha-(1-2)-phosphatidylinositol mannosyltransferase	EC2.4.1.345	GT4
BcellWH2_00350	1.69	6.09	0.0177836	0.166629	ALJ57625.1	Sirohydrochlorin cobaltochelatase	EC4.99.1.3
BcellWH2_02200	-1.15	6.9	0.0145024	0.148205	ALJ59441.1	Inner membrane protein YohK	Unknown
BcellWH2_00313	-2.2	5.19	0.0188719	0.170552	ALJ57589.1	Undecaprenol kinase	EC2.7.1.107
BcellWH2_04235	-3.33	4.19	0.0164762	0.160056	ALJ61452.1	Rhamnogalacturonan acetylesterase RhgT	NOT DEFINED	CE12
BcellWH2_04547	4.56	3.11	0.0104963	0.126566	ALJ61762.1	hypothetical protein	Unknown
BcellWH2_01851	-1.62	5.89	0.0188851	0.170552	ALJ59104.1	hypothetical protein
BcellWH2_02503	0.83	7.62	0.011562	0.134157	ALJ59742.1	Hemolysin secretion protein D, chromosomal	NOT DEFINED
BcellWH2_05005	-1.03	6.89	0.0146384	0.148674	ALJ62214.1	General stress protein 69	NOT DEFINED
BcellWH2_02250	0.71	8.27	0.00946471	0.117739	ALJ59491.1	Beta-lactamase	EC3.4.16.4
BcellWH2_02036	-0.78	7.87	0.0106803	0.12752	ALJ59281.1	L-glyceraldehyde 3-phosphate reductase	EC1.1.1.-
BcellWH2_04000	4.74	2.71	0.0118519	0.134737	ALJ61220.1	hypothetical protein
BcellWH2_01458	5.12	0.53	0.00504823	0.080067	ALJ58719.1	Ferric uptake regulation protein	NOT DEFINED
BcellWH2_00995	0.99	7.1	0.0139932	0.145767	ALJ58257.1	hypothetical protein	Unknown
BcellWH2_00548	-1.44	8.17	0.0117671	0.134664	ALJ57816.1	LPS O-antigen length regulator	Unknown
BcellWH2_02638	-0.71	8.48	0.00934174	0.116821	ALJ59877.1	hypothetical protein	Unknown		BcellWH2:47	BcellWH2:53
BcellWH2_02577	1.42	6.43	0.0172048	0.163515	ALJ59816.1	hypothetical protein	Unknown
BcellWH2_05040	-0.62	8.62	0.00873583	0.111894	ALJ62249.1	hypothetical protein	Unknown
BcellWH2_03088	-2.47	5.4	0.01973	0.174919	ALJ60325.1	Mannosylfructose-phosphate synthase	EC2.4.1.-	GT4
BcellWH2_04570	0.81	7.64	0.0118417	0.134737	ALJ61785.1	hypothetical protein	NOT DEFINED
BcellWH2_03974	-1.6	6.02	0.0187164	0.170478	ALJ61194.1	hypothetical protein	Unknown
BcellWH2_01526	2.37	4.98	0.0196156	0.174884	ALJ58781.1	Acetyltransferase (GNAT) family protein	Unknown
BcellWH2_05386	1.03	6.86	0.0149006	0.1497	ALJ62586.1	Cyclic nucleotide-binding domain protein	Unknown
BcellWH2_04079	1.43	7.11	0.0177461	0.166629	ALJ61299.1	hypothetical protein	Unknown
BcellWH2_05460	0.77	8.41	0.0104076	0.126166	ALJ62658.1	Phosphoethanolamine transferase EptA	EC2.7.8.43
BcellWH2_03966	1.51	6.17	0.0191568	0.172085	ALJ61186.1	hypothetical protein		GH108
BcellWH2_00520	-3.18	4.01	0.0174837	0.165834	ALJ57788.1	Putative redox-active protein (C_GCAxxG_C_C)	EC1.5.1.3
BcellWH2_03509	0.65	8.6	0.00904179	0.114578	ALJ60732.1	Non-reducing end beta-L-arabinofuranosidase	NOT DEFINED
BcellWH2_04594	-2.72	4.84	0.0196634	0.174919	ALJ61809.1	Fimbrillin-A associated anchor proteins Mfa1 and Mfa2	Unknown
BcellWH2_00182	1.61	5.94	0.0195016	0.174522	ALJ57458.1	Lipopolysaccharide export system ATP-binding protein LptB	NOT DEFINED
BcellWH2_04985	-0.5	9.48	0.00639869	0.0894311	ALJ62194.1	Fibrobacter succinogenes major domain (Fib_succ_major)	Unknown
BcellWH2_04065	-2.98	4.86	0.019225	0.172372	ALJ61285.1	hypothetical protein	Unknown
BcellWH2_00636	1.86	6.34	0.0201973	0.17708	ALJ57904.1	hypothetical protein
BcellWH2_02428	0.91	7.13	0.0146381	0.148674	ALJ59667.1	hypothetical protein	Unknown
BcellWH2_02876	1.03	7.28	0.0139512	0.145706	ALJ60115.1	Transglutaminase-like superfamily protein	Unknown
BcellWH2_01290	0.95	7.53	0.0128492	0.140321	ALJ58551.1	SusD family protein	NOT DEFINED		BcellWH2:13	BcellWH2:14
BcellWH2_03612	1.04	6.93	0.0154589	0.153363	ALJ60835.1	hypothetical protein	Unknown
BcellWH2_04054	0.71	8.11	0.0112968	0.132877	ALJ61274.1	Fibronectin type III domain protein	Unknown		BcellWH2:83	BcellWH2:95
BcellWH2_01317	-0.9	7.32	0.0144918	0.148205	ALJ58578.1	putative chromate transport protein	NOT DEFINED
BcellWH2_01654	-0.96	7.04	0.0158714	0.155828	ALJ58907.1	hypothetical protein	Unknown	GH145	BcellWH2:17	BcellWH2:18
BcellWH2_04444	0.75	7.92	0.0117494	0.134664	ALJ61661.1	hypothetical protein	Unknown
BcellWH2_04584	0.92	7.46	0.0131229	0.140768	ALJ61799.1	Transposase, Mutator family	NOT DEFINED
BcellWH2_02326	-0.55	9.27	0.00745298	0.10119	ALJ59566.1	alpha-glucosidase	NOT DEFINED	GH63	BcellWH2:39	BcellWH2:43
BcellWH2_00533	0.77	7.89	0.0124272	0.136699	ALJ57801.1	3-oxoacyl-[acyl-carrier-protein] synthase 3	EC2.3.1.180
BcellWH2_02437	0.84	7.42	0.0138446	0.14511	ALJ59676.1	Neopullulanase	EC3.2.1.1	GH13	BcellWH2:43	BcellWH2:48
BcellWH2_04308	-0.8	7.72	0.0127382	0.139474	ALJ61525.1	Alpha/beta hydrolase family protein	EC3.1.1.1		BcellWH2:87
BcellWH2_00997	-0.95	7.52	0.013822	0.14511	ALJ58259.1	Tyrocidine synthase 3	EC6.1.1.13
BcellWH2_01121	0.91	7.68	0.0132347	0.141329	ALJ58383.1	Fibronectin type III domain protein	Unknown		BcellWH2:9	BcellWH2:9
BcellWH2_01659	-0.58	9.06	0.00846058	0.109031	ALJ58912.1	Sensor histidine kinase TodS	Unknown		BcellWH2:17	BcellWH2:18
BcellWH2_01686	-3.71	3.64	0.0180356	0.16772	ALJ58939.1	Transcriptional regulatory protein YehT	NOT DEFINED
BcellWH2_01315	2.64	4.78	0.0228986	0.190979	ALJ58576.1	Sensor histidine kinase TmoS	Unknown
BcellWH2_05255	-2.63	5.94	0.0230243	0.191279	ALJ62457.1	Ammonia channel precursor	NOT DEFINED
BcellWH2_00195	-0.59	8.4	0.0103131	0.125984	ALJ57471.1	hypothetical protein	Unknown
BcellWH2_00211	-4.71	2.34	0.0123596	0.136533	ALJ57487.1	thiamine biosynthesis protein ThiF	EC2.7.7.80:EC2.7.7.-:EC2.8.1.11:EC2.8.1.-
BcellWH2_03058	-0.71	8.12	0.0114522	0.133384	ALJ60296.1	hypothetical protein	NOT DEFINED		BcellWH2:60	BcellWH2:69
BcellWH2_05531	-4.45	2.61	0.0131987	0.141262	ALJ62729.1	hypothetical protein	Unknown
BcellWH2_05413	1.34	6.84	0.0189143	0.170552	ALJ62613.1	ABC-2 family transporter protein	NOT DEFINED
BcellWH2_00655	-0.9	7.36	0.0147673	0.148674	ALJ57922.1	Multidrug export protein MepA	NOT DEFINED
BcellWH2_02193	1	6.8	0.0175627	0.165921	ALJ59434.1	Alkaline phosphatase 3 precursor	EC3.1.3.1
BcellWH2_04365	-3.09	5.28	0.0229079	0.190979	ALJ61582.1	D-inositol 3-phosphate glycosyltransferase	EC2.4.1.346	GT4
BcellWH2_04629	-0.69	8	0.012348	0.136533	ALJ61843.1	1,5-anhydro-D-fructose reductase	EC1.1.1.335
BcellWH2_01425	-1.2	6.87	0.0189853	0.170868	ALJ58686.1	hypothetical protein	Unknown
BcellWH2_02773	-1.87	6.24	0.0235283	0.193611	ALJ60012.1	hypothetical protein	Unknown
BcellWH2_00559	-3.44	3.73	0.0185492	0.170478	ALJ57827.1	Electron transport complex protein RnfG	NOT DEFINED
BcellWH2_03952	0.67	8.31	0.0110401	0.13083	ALJ61172.1	hypothetical protein	Unknown
BcellWH2_02269	0.48	9.23	0.00803351	0.106042	ALJ59509.1	TonB dependent receptor	NOT DEFINED		BcellWH2:35	BcellWH2:39
BcellWH2_02964	4.19	3.08	0.0147592	0.148674	ALJ60202.1	putative protease YhbU precursor	EC3.4.-.-
BcellWH2_01308	-3.07	4.3	0.0220027	0.186709	ALJ58569.1	oxaloacetate decarboxylase subunit gamma	EC4.1.1.3
BcellWH2_02807	-0.88	6.98	0.0171914	0.163515	ALJ60046.1	hypothetical protein	NOT DEFINED
BcellWH2_01691	-1.35	5.9	0.0238131	0.194547	ALJ58944.1	ORF6N domain protein	Unknown
BcellWH2_00965	4.26	3.08	0.0161431	0.15752	ALJ58227.1	Nucleotidyltransferase domain protein	NOT DEFINED
BcellWH2_03652	0.72	8.06	0.0130211	0.140321	ALJ60875.1	Choline-sulfatase	EC3.1.6.-		BcellWH2:77	BcellWH2:86
BcellWH2_04457	-3.84	3.1	0.0188641	0.170552	ALJ61674.1	hypothetical protein	Unknown
BcellWH2_04931	0.63	8.73	0.0103813	0.126166	ALJ62140.1	Sialidase B precursor	EC3.2.1.40	GH78-GH33
BcellWH2_02654	-0.72	8.23	0.0127317	0.139474	ALJ59893.1	SusD family protein	NOT DEFINED		BcellWH2:47	BcellWH2:54
BcellWH2_02538	0.9	7.3	0.0166099	0.160297	ALJ59777.1	hypothetical protein	Unknown		BcellWH2:45	BcellWH2:51
BcellWH2_01160	1.25	6.06	0.0228573	0.190979	ALJ58422.1	lipoprotein involved with copper homeostasis and adhesion	NOT DEFINED
BcellWH2_05025	1.95	5.74	0.0263544	0.20538	ALJ62234.1	Outer membrane protein 41 precursor	NOT DEFINED
BcellWH2_00830	2.38	4.86	0.0261954	0.204738	ALJ58093.1	hypothetical protein	Unknown
BcellWH2_05511	1.52	5.81	0.0257078	0.20416	ALJ62709.1	ECF RNA polymerase sigma factor SigW	NOT DEFINED
BcellWH2_05254	-4.2	3.06	0.0178481	0.166629	ALJ62456.1	Glutamine synthetase	EC6.3.1.2
BcellWH2_02070	1.7	5.49	0.0267018	0.20665	ALJ59313.1	hypothetical protein	Unknown
BcellWH2_04593	-2.94	4.54	0.0264464	0.205675	ALJ61808.1	Major fimbrial subunit protein (FimA)	Unknown
BcellWH2_03376	-1.5	6.01	0.0259804	0.20416	ALJ60609.1	hypothetical protein	Unknown
BcellWH2_01680	2.92	4.22	0.025072	0.201254	ALJ58933.1	RNA polymerase sigma factor	NOT DEFINED		BcellWH2:18	BcellWH2:22
BcellWH2_05127	1.11	6.51	0.0222809	0.188156	ALJ62335.1	hypothetical protein	Unknown
BcellWH2_03643	0.54	8.97	0.00986946	0.121188	ALJ60866.1	Glycosyl hydrolase family 92	Unknown	GH92	BcellWH2:77
BcellWH2_02060	0.74	7.82	0.0147229	0.148674	ALJ59305.1	Malate dehydrogenase	EC1.1.1.37
BcellWH2_04616	1.26	6.2	0.0246308	0.199057	ALJ61831.1	hypothetical protein	Unknown
BcellWH2_02789	1.06	7.03	0.020123	0.176755	ALJ60028.1	putative amino-acid metabolite efflux pump	NOT DEFINED
BcellWH2_03525	3.69	3.3	0.022388	0.188246	ALJ60748.1	hypothetical protein	Unknown
BcellWH2_02273	-0.62	8.68	0.0112641	0.132822	ALJ59513.1	Alpha-L-fucosidase	EC3.2.1.51	GH29	BcellWH2:36	BcellWH2:40
BcellWH2_02946	3.01	4.01	0.0256778	0.20416	ALJ60184.1	ORF6N domain protein	Unknown
BcellWH2_01281	2.52	4.39	0.0282865	0.211993	ALJ58542.1	3-deoxy-D-manno-octulosonate 8-phosphate phosphatase KdsC	EC3.1.3.45
BcellWH2_00810	1.19	6.74	0.0224216	0.188246	ALJ58073.1	hypothetical protein
BcellWH2_01580	0.55	8.44	0.0121486	0.13648	ALJ58834.1	Unsaturated rhamnogalacturonyl hydrolase YteR	EC3.2.1.172	GH105	BcellWH2:15	BcellWH2:16
BcellWH2_02836	0.76	8.41	0.0122453	0.136533	ALJ60075.1	Xylosidase/arabinosidase	EC3.2.1.55	GH43_35
BcellWH2_00504	-2.15	5.14	0.0291205	0.216897	ALJ57772.1	hypothetical protein	Unknown
BcellWH2_03757	-1.21	6.56	0.0233041	0.192594	ALJ60979.1	Relaxase/mobilization nuclease domain protein	Unknown
BcellWH2_00662	0.96	6.74	0.0218118	0.185752	ALJ57929.1	Outer membrane protein OprM precursor	NOT DEFINED
BcellWH2_04887	4.35	2.24	0.0165041	0.160056	ALJ62096.1	hypothetical protein	Unknown
BcellWH2_01831	-0.42	10.14	0.00662892	0.0921071	ALJ59084.1	Sensor histidine kinase TodS	Unknown
BcellWH2_04743	0.76	7.7	0.0158492	0.155828	ALJ61955.1	Pyruvate formate-lyase 1-activating enzyme	EC1.97.1.4
BcellWH2_00312	-1.23	6.78	0.0211308	0.181363	ALJ57588.1	GTP pyrophosphokinase	EC2.7.6.5
BcellWH2_00947	-0.73	8.1	0.0144943	0.148205	ALJ58209.1	Arginine-binding extracellular protein ArtP precursor	EC4.2.2.-
BcellWH2_04905	4.25	2.37	0.0199587	0.175963	ALJ62114.1	hypothetical protein	Unknown		BcellWH2:93	BcellWH2:111
BcellWH2_00471	1.77	5.51	0.0303437	0.221093	ALJ57739.1	Superoxide dismutase [Mn/Fe]	EC1.15.1.1
BcellWH2_02816	-1.37	6.2	0.026788	0.20665	ALJ60055.1	Transcriptional regulatory protein YehT	NOT DEFINED
BcellWH2_04302	0.65	8.66	0.0117802	0.134664	ALJ61519.1	Endo-1,4-beta-xylanase A precursor	EC3.2.1.8	GH10	BcellWH2:87	BcellWH2:102
BcellWH2_03581	1.3	6.1	0.0259247	0.20416	ALJ60804.1	hypothetical protein	Unknown
BcellWH2_01007	-0.54	9.09	0.0104979	0.126566	ALJ58269.1	Penicillin-binding protein 4 precursor	EC2.4.1.129	GT51
BcellWH2_05176	-4.5	1.56	0.0170512	0.163362	ALJ62384.1	Aspartate aminotransferase	EC2.6.1.1
BcellWH2_04615	3.35	2.78	0.02298	0.191245	ALJ61830.1	hypothetical protein	Unknown
BcellWH2_05136	0.71	8.47	0.0129433	0.140321	ALJ62344.1	Dipeptidase A	EC3.4.-.-
BcellWH2_04243	-1.71	6.21	0.0285992	0.213684	ALJ61460.1	hypothetical protein	EC2.4.1.25	GH133
BcellWH2_03972	-2	5.43	0.0313645	0.223499	ALJ61192.1	T4-like virus tail tube protein gp19	Unknown
BcellWH2_04493	0.64	8.25	0.0142334	0.146718	ALJ61709.1	Retaining alpha-galactosidase precursor	EC3.2.1.20	GH97	BcellWH2:89	BcellWH2:106
BcellWH2_00340	-0.88	7.68	0.0170494	0.163362	ALJ57615.1	glmZ(sRNA)-inactivating NTPase	EC2.7.1.-
BcellWH2_02242	-2.7	4.87	0.0312368	0.223499	ALJ59483.1	hypothetical protein	Unknown
BcellWH2_02907	0.97	7.15	0.0200925	0.176755	ALJ60146.1	Xylosidase/arabinosidase	EC3.2.1.55	GH43_2-CBM6	BcellWH2:54	BcellWH2:63
BcellWH2_01083	1.62	5.68	0.0303422	0.221093	ALJ58345.1	putative AAA-ATPase	Unknown
BcellWH2_03712	-3.37	3.85	0.0275927	0.210712	ALJ60934.1	Pyrimidine 5'-nucleotidase YjjG	NOT DEFINED
BcellWH2_01142	-0.65	8.34	0.0136927	0.144917	ALJ58404.1	hypothetical protein	EC4.2.2.2	PL1_2
BcellWH2_03928	-2.82	4.39	0.0297345	0.220091	ALJ61149.1	hypothetical protein
BcellWH2_02915	1.07	6.93	0.0217349	0.185429	ALJ60154.1	Carbohydrate acetyl esterase/feruloyl esterase precursor	NOT DEFINED	CE1	BcellWH2:54	BcellWH2:63
BcellWH2_01749	-1.18	6.37	0.0254646	0.203375	ALJ59002.1	Metalloprotease LoiP precursor	EC3.4.24.-
BcellWH2_05129	1.85	6.06	0.0315816	0.223499	ALJ62337.1	Glutamate/gamma-aminobutyrate antiporter	NOT DEFINED
BcellWH2_00557	-2.57	4.92	0.0321116	0.225398	ALJ57825.1	Electron transport complex protein RnfA	NOT DEFINED
BcellWH2_02685	-1.59	5.94	0.030083	0.220269	ALJ59924.1	putative hydrolase	NOT DEFINED
BcellWH2_03582	-3.61	4.54	0.0281112	0.211703	ALJ60805.1	Pesticin receptor precursor	NOT DEFINED
BcellWH2_00316	1.43	6.35	0.0278733	0.210712	ALJ57592.1	Beta-phosphoglucomutase	EC3.1.3.23
BcellWH2_00632	-0.88	7.17	0.0199235	0.175963	ALJ57900.1	hypothetical protein	NOT DEFINED
BcellWH2_03566	0.76	7.56	0.018151	0.168284	ALJ60789.1	putative ABC transporter ATP-binding protein YheS	NOT DEFINED
BcellWH2_03736	2.69	3.68	0.0314115	0.223499	ALJ60958.1	hypothetical protein	Unknown
BcellWH2_01243	3.48	3.84	0.0277157	0.210712	ALJ58505.1	Putative undecaprenyl-diphosphatase YbjG	EC3.6.1.27
BcellWH2_00786	-1.45	6.74	0.0281864	0.211933	ALJ58049.1	hypothetical protein	Unknown
BcellWH2_03496	3.38	3.66	0.0271414	0.208362	ALJ60720.1	Biopolymer transport protein ExbD/TolR	NOT DEFINED
BcellWH2_03180	0.57	8.83	0.0121128	0.13648	ALJ60417.1	Retaining alpha-galactosidase precursor	EC3.2.1.20	GH97	BcellWH2:65	BcellWH2:74
BcellWH2_03033	-0.82	7.95	0.0165039	0.160056	ALJ60271.1	Sodium/glucose cotransporter	NOT DEFINED		BcellWH2:59	BcellWH2:68
BcellWH2_05210	-3.41	3.44	0.027891	0.210712	ALJ62413.1	Altronate dehydratase	EC4.2.1.7
BcellWH2_02721	-1	6.85	0.0237963	0.194547	ALJ59960.1	hypothetical protein	Unknown		BcellWH2:49	BcellWH2:57
BcellWH2_05080	2.79	4.03	0.0306087	0.221688	ALJ62288.1	Putative DNA-invertase from lambdoid prophage Rac	NOT DEFINED
BcellWH2_00767	3.27	3.61	0.0293821	0.218504	ALJ58030.1	hypothetical protein	Unknown
BcellWH2_03163	-4.51	2.42	0.0205488	0.178566	ALJ60400.1	hypothetical protein			BcellWH2:64
BcellWH2_01571	0.84	7.27	0.0205547	0.178566	ALJ58825.1	SusD family protein	NOT DEFINED		BcellWH2:15	BcellWH2:16
BcellWH2_02676	-0.79	7.61	0.018167	0.168284	ALJ59915.1	UvrABC system protein C	NOT DEFINED
BcellWH2_03239	-0.56	8.72	0.0129214	0.140321	ALJ60473.1	hypothetical protein	Unknown	GH144	BcellWH2:66	BcellWH2:75
BcellWH2_03143	0.52	9.3	0.0103465	0.126068	ALJ60380.1	hypothetical protein	Unknown	GH106	BcellWH2:63
BcellWH2_00852	4.36	1.36	0.0186552	0.170478	ALJ58115.1	hypothetical protein	Unknown
BcellWH2_00918	-2.72	4.97	0.0336669	0.231527	ALJ58180.1	L-fucose-proton symporter	NOT DEFINED
BcellWH2_03071	-4.6	1.32	0.0183236	0.169075	ALJ60309.1	hypothetical protein	Unknown
BcellWH2_01273	-1.15	6.36	0.0298647	0.220269	ALJ58534.1	Bacillibactin exporter	Unknown
BcellWH2_02014	-3.23	4.1	0.0317	0.223499	ALJ59259.1	Potassium-transporting ATPase C chain	EC3.6.3.12
BcellWH2_00127	4.06	2.78	0.0260356	0.20416	ALJ57403.1	hypothetical protein	Unknown
BcellWH2_02308	4.58	1.06	0.0169426	0.162979	ALJ59548.1	Peptide chain release factor 2	NOT DEFINED
BcellWH2_01546	0.85	7.56	0.0198062	0.175269	ALJ58800.1	ATP-dependent RecD-like DNA helicase	EC3.6.4.12:EC3.6.4.13
BcellWH2_05126	-1.72	5.57	0.0358312	0.23991	ALJ62334.1	hypothetical protein	Unknown
BcellWH2_03746	-3.95	1.82	0.024955	0.200994	ALJ60968.1	hypothetical protein	Unknown
BcellWH2_03277	-0.72	8.39	0.0152605	0.152029	ALJ60511.1	Autoinducer 2 sensor kinase/phosphatase LuxQ	EC2.1.1.80:EC3.1.1.61
BcellWH2_01302	0.56	9.23	0.0113898	0.133312	ALJ58563.1	Maltose phosphorylase	EC2.4.1.8	GH65
BcellWH2_03321	1.71	5.5	0.0350281	0.236439	ALJ60554.1	hypothetical protein
BcellWH2_01719	-2.69	3.71	0.0346978	0.235548	ALJ58972.1	hypothetical protein	Unknown
BcellWH2_00753	-4.05	3.86	0.0303941	0.221093	ALJ58017.1	LPS O-antigen length regulator	Unknown
BcellWH2_04936	-0.83	7.9	0.0178461	0.166629	ALJ62145.1	hypothetical protein	EC3.2.1.31	GH141
BcellWH2_04711	3.46	2.88	0.0299488	0.220269	ALJ61924.1	hypothetical protein	EC1.5.1.3
BcellWH2_02218	0.58	8.97	0.0120596	0.13648	ALJ59459.1	hypothetical protein	NOT DEFINED
BcellWH2_05147	-0.71	8.04	0.0171063	0.163487	ALJ62355.1	putative ABC transporter ATP-binding protein YheS	EC3.6.3.25|EC3.6.3.41
BcellWH2_05184	3.37	4.28	0.0339296	0.231991	ALJ62392.1	Adenosylmethionine-8-amino-7-oxononanoate aminotransferase	EC2.6.1.62
BcellWH2_01011	-3.2	3.99	0.0338131	0.231734	ALJ58273.1	hypothetical protein	Unknown
BcellWH2_01613	-3.55	4.86	0.0327153	0.227952	ALJ58866.1	4-alpha-glucanotransferase	EC2.4.1.25	CBM20-CBM20-GH77
BcellWH2_02396	-4.05	2.99	0.0268785	0.207013	ALJ59635.1	2,3-bisphosphoglycerate-independent phosphoglycerate mutase	EC5.4.2.12
BcellWH2_00856	2.86	4.4	0.0356582	0.239671	ALJ58119.1	hypothetical protein	Unknown
BcellWH2_02604	2.81	3.91	0.0367602	0.242998	ALJ59843.1	hypothetical protein
BcellWH2_04878	-2.23	5.08	0.0379797	0.245855	ALJ62087.1	hypothetical protein	Unknown
BcellWH2_04241	-2.3	5.2	0.0382426	0.246113	ALJ61458.1	Rhomboid family protein	Unknown
BcellWH2_00259	0.63	8	0.0175536	0.165921	ALJ57535.1	hypothetical protein	Unknown
BcellWH2_03669	3.06	4.21	0.0358211	0.23991	ALJ60892.1	HTH-type transcriptional activator RhaS	Unknown		BcellWH2:78
BcellWH2_00169	2.69	3.83	0.0365065	0.242342	ALJ57445.1	IS66 Orf2 like protein	NOT DEFINED
BcellWH2_01722	0.71	7.59	0.0208796	0.180728	ALJ58975.1	hypothetical protein	Unknown
BcellWH2_01027	1.36	7.02	0.03065	0.221688	ALJ58289.1	Undecaprenyl-phosphate mannosyltransferase	EC2.4.1.83	GT2
BcellWH2_00153	-1.96	4.91	0.0391595	0.24978	ALJ57429.1	hypothetical protein	Unknown
BcellWH2_04818	-1.05	6.59	0.0294526	0.218686	ALJ62027.1	NADPH-dependent 7-cyano-7-deazaguanine reductase	EC1.7.1.13
BcellWH2_00704	-1.11	6.78	0.0280624	0.211671	ALJ57968.1	Teichuronic acid biosynthesis protein TuaB	NOT DEFINED
BcellWH2_03796	-3.15	3.91	0.0346357	0.235463	ALJ61018.1	hypothetical protein
BcellWH2_02080	0.69	8.14	0.0177371	0.166629	ALJ59323.1	Arylsulfatase	EC3.1.6.1		BcellWH2:29	BcellWH2:33
BcellWH2_01898	-1.69	5.78	0.0370424	0.243589	ALJ59149.1	hypothetical protein	Unknown		BcellWH2:24	BcellWH2:28
BcellWH2_00141	3.07	4.35	0.0373218	0.243617	ALJ57417.1	hypothetical protein	Unknown
BcellWH2_04360	4.79	0.71	0.0186276	0.170478	ALJ61577.1	Transcription antitermination protein RfaH	NOT DEFINED
BcellWH2_02924	-2.29	4.69	0.0402421	0.251619	ALJ60162.1	4-deoxy-L-threo-5-hexosulose-uronate ketol-isomerase	EC5.3.1.17
BcellWH2_05394	0.7	7.68	0.020552	0.178566	ALJ62594.1	Aminodeoxychorismate synthase component 1	EC2.6.1.85
BcellWH2_00232	-1	6.5	0.0301863	0.220685	ALJ57508.1	Relaxase/mobilization nuclease domain protein	Unknown
BcellWH2_01264	4.28	1.88	0.0251868	0.201834	ALJ58526.1	hypothetical protein	Unknown
BcellWH2_04489	0.76	8.05	0.0186349	0.170478	ALJ61705.1	Putative penicillin-binding protein PbpX	EC3.4.16.4
BcellWH2_03630	-0.51	9.38	0.011575	0.134157	ALJ60853.1	hypothetical protein	Unknown		BcellWH2:76	BcellWH2:85
BcellWH2_00698	0.8	7.43	0.0231709	0.191826	ALJ57962.1	Putative teichuronic acid biosynthesis glycosyltransferase TuaH	EC2.-.-.-	GT4
BcellWH2_00485	4.41	0.61	0.020478	0.178566	ALJ57753.1	Putative pyridoxal phosphate-dependent aminotransferase EpsN	EC2.6.1.-
BcellWH2_02275	2.7	4.24	0.0407703	0.253204	ALJ59515.1	L-fucose mutarotase	EC5.1.3.32		BcellWH2:36	BcellWH2:40
BcellWH2_03724	3.03	3.74	0.0405053	0.252691	ALJ60946.1	hypothetical protein	Unknown
BcellWH2_05390	1.16	6.34	0.033776	0.231734	ALJ62590.1	Phosphonoacetaldehyde hydrolase	EC3.11.1.1
BcellWH2_02827	1.43	6.44	0.0324938	0.227409	ALJ60066.1	ECF RNA polymerase sigma-E factor	NOT DEFINED		BcellWH2:52
BcellWH2_01025	-1	6.86	0.0311513	0.223499	ALJ58287.1	hypothetical protein	Unknown
BcellWH2_05328	2.25	4.76	0.0434037	0.261211	ALJ62530.1	UDP-2,3-diacylglucosamine hydrolase	Unknown
BcellWH2_01866	-0.45	9.72	0.0105472	0.126566	ALJ59119.1	Peptidase family C25	Unknown
BcellWH2_02408	-0.62	8.11	0.0187626	0.170478	ALJ59647.1	Putative K(+)-stimulated pyrophosphate-energized sodium pump	EC3.6.1.1
BcellWH2_04378	-4.15	2.52	0.0300692	0.220269	ALJ61595.1	Short-chain reductase protein NovJ	EC1.3.1.28
BcellWH2_04674	3.84	1.59	0.0314648	0.223499	ALJ61888.1	hypothetical protein	Unknown
BcellWH2_04906	0.77	7.44	0.0235495	0.193611	ALJ62115.1	Glycosyl hydrolases family 43	EC3.2.1.23	GH43_18	BcellWH2:93	BcellWH2:111
BcellWH2_04135	3.65	3	0.0372134	0.243617	ALJ61355.1	B3/4 domain protein	EC6.1.1.6
BcellWH2_00248	1.03	6.79	0.0299819	0.220269	ALJ57524.1	hypothetical protein	Unknown
BcellWH2_05140	3.62	2.92	0.0354635	0.238701	ALJ62348.1	hypothetical protein
BcellWH2_02021	-2.67	5.47	0.044582	0.265481	ALJ59266.1	Cellobiose 2-epimerase	EC5.1.3.11			BcellWH2:32
BcellWH2_00975	1.1	6.83	0.0326906	0.227952	ALJ58237.1	PGL/p-HBAD biosynthesis glycosyltransferase	EC2.4.1.-	GT2
BcellWH2_04403	-3.81	3.08	0.0370612	0.243589	ALJ61620.1	hypothetical protein	Unknown
BcellWH2_04988	-0.85	7.5	0.02487	0.200649	ALJ62197.1	NADP-reducing hydrogenase subunit HndC	EC1.6.5.3
BcellWH2_03356	4.03	2.81	0.035904	0.239931	ALJ60589.1	hypothetical protein	Unknown
BcellWH2_04729	4.67	1.62	0.0267644	0.20665	ALJ61942.1	hypothetical protein	Unknown
BcellWH2_00883	-1.37	8.07	0.0221884	0.187949	ALJ58145.1	hypothetical protein	Unknown
BcellWH2_02603	-0.46	9.29	0.0130222	0.140321	ALJ59842.1	hypothetical protein	Unknown
BcellWH2_00351	-0.75	7.84	0.0223891	0.188246	ALJ57626.1	hypothetical protein	Unknown
BcellWH2_05281	0.72	7.99	0.0208158	0.180505	ALJ62483.1	L-fucose mutarotase	EC5.1.3.32
BcellWH2_02388	-0.76	7.79	0.0225515	0.189003	ALJ59628.1	Lipid A 3-O-deacylase (PagL)	Unknown
BcellWH2_04958	-0.76	7.53	0.0240093	0.195364	ALJ62167.1	hypothetical protein	NOT DEFINED
BcellWH2_02841	0.6	8.62	0.0165779	0.160297	ALJ60080.1	Beta-galactosidase	EC3.2.1.23	GH2
BcellWH2_03066	4.03	2.5	0.0367979	0.242998	ALJ60304.1	hypothetical protein	Unknown
BcellWH2_02672	-0.62	8.2	0.0197215	0.174919	ALJ59911.1	Serine/threonine-protein kinase PknB	EC2.7.11.1
BcellWH2_02663	1.13	6.28	0.037288	0.243617	ALJ59902.1	hypothetical protein	Unknown
BcellWH2_03458	0.52	9.16	0.0141787	0.146472	ALJ60687.1	Multidrug resistance protein MdtC	NOT DEFINED
BcellWH2_04534	-0.69	7.99	0.0211024	0.181363	ALJ61750.1	5'-methylthioadenosine/S-adenosylhomocysteine nucleosidase	EC3.2.2.9
BcellWH2_04274	-0.44	9.86	0.0106404	0.127363	ALJ61491.1	hypothetical protein
BcellWH2_02410	1.43	5.68	0.0438712	0.262564	ALJ59649.1	ECF RNA polymerase sigma factor SigL	NOT DEFINED
BcellWH2_05507	1.72	5.33	0.0474334	0.274111	ALJ62705.1	flavodoxin	Unknown
BcellWH2_04284	0.87	6.97	0.0297889	0.220151	ALJ61501.1	TraB family protein	NOT DEFINED
BcellWH2_04491	1.03	6.06	0.039407	0.250018	ALJ61707.1	hypothetical protein	Unknown
BcellWH2_00432	-2.48	4.96	0.0492086	0.277226	ALJ57707.1	ParB-like nuclease domain protein	Unknown
BcellWH2_04011	-1.39	6.02	0.0431157	0.261001	ALJ61231.1	hypothetical protein	Unknown
BcellWH2_02973	-0.61	8.99	0.0157253	0.155356	ALJ60211.1	SusD family protein	NOT DEFINED		BcellWH2:55	BcellWH2:64
BcellWH2_04946	1.61	5.24	0.0466226	0.271085	ALJ62155.1	Biotin carboxylase	EC6.4.1.2:EC6.3.4.14
BcellWH2_02234	-0.52	9.19	0.0140184	0.145767	ALJ59475.1	Susd and RagB outer membrane lipoprotein	Unknown		BcellWH2:34	BcellWH2:38
BcellWH2_02649	-0.55	8.6	0.0178833	0.16663	ALJ59888.1	Exo-beta-D-glucosaminidase precursor	EC3.2.1.165	GH2	BcellWH2:47	BcellWH2:53
BcellWH2_03664	2.48	4.38	0.0494131	0.277226	ALJ60887.1	HTH-type transcriptional activator Btr	NOT DEFINED
BcellWH2_04819	-1.53	5.56	0.046418	0.271022	ALJ62028.1	hypothetical protein	Unknown
BcellWH2_05072	0.89	7.03	0.0305019	0.22129	ALJ62280.1	Tetratricopeptide repeat protein	EC3.4.21.107
BcellWH2_02444	-3.13	3	0.045655	0.269194	ALJ59683.1	Acetylglutamate kinase	EC2.7.2.8
BcellWH2_03354	4.14	0.88	0.0328978	0.228277	ALJ60587.1	hypothetical protein	Unknown
BcellWH2_01336	-2.41	5.35	0.0513727	0.284526	ALJ58597.1	putative transporter	NOT DEFINED			BcellWH2:15
BcellWH2_04572	-0.8	7.58	0.0259713	0.20416	ALJ61787.1	Endonuclease 4	EC3.1.21.2
BcellWH2_03750	4	1.49	0.0374499	0.244118	ALJ60972.1	hypothetical protein
BcellWH2_03879	-0.81	7.65	0.0259993	0.20416	ALJ61100.1	hypothetical protein	Unknown
BcellWH2_02543	0.79	7.34	0.0278324	0.210712	ALJ59782.1	putative oxidoreductase UxuB	EC4.2.1.8
BcellWH2_00203	-3.64	1.98	0.0421117	0.257635	ALJ57479.1	hypothetical protein	Unknown
BcellWH2_00894	-2.31	4.57	0.0534454	0.292259	ALJ58156.1	Sulfotransferase domain protein	Unknown
BcellWH2_04978	-1.16	6.63	0.037896	0.245733	ALJ62187.1	NAD dependent epimerase/dehydratase family protein	EC1.1.1.367
BcellWH2_03389	2.82	3.72	0.0506186	0.281662	ALJ60622.1	Low molecular weight protein-tyrosine-phosphatase YfkJ	EC3.1.3.48
BcellWH2_02341	0.48	9.52	0.0131036	0.140768	ALJ59581.1	SusD family protein	NOT DEFINED		BcellWH2:40	BcellWH2:44
BcellWH2_00529	-3.14	4.34	0.0523354	0.288178	ALJ57797.1	PGL/p-HBAD biosynthesis glycosyltransferase	EC2.4.1.-	GT2
BcellWH2_04612	-1.48	6.1	0.0477723	0.274463	ALJ61827.1	hypothetical protein	NOT DEFINED
BcellWH2_02777	1.31	5.97	0.0447239	0.265651	ALJ60016.1	hypothetical protein	Unknown
BcellWH2_00980	0.71	7.68	0.0258966	0.20416	ALJ58242.1	putative glycosyltransferase EpsJ	EC2.4.-.-	GT2
BcellWH2_01286	-0.66	7.61	0.026364	0.20538	ALJ58547.1	Amylo-alpha-1,6-glucosidase	EC3.2.1.41	GH	BcellWH2:13	BcellWH2:14
BcellWH2_01195	0.42	10.22	0.00980525	0.120907	ALJ58457.1	Formylglycine-generating sulfatase enzyme	EC2.7.11.1	CBM51
BcellWH2_05448	-1.52	5.83	0.0498582	0.278595	ALJ62647.1	HTH-type transcriptional regulator DegA	NOT DEFINED
BcellWH2_01801	-1.21	6.19	0.0429706	0.260454	ALJ59054.1	hypothetical protein	Unknown
BcellWH2_05416	-1.91	5.16	0.0549551	0.297095	ALJ62615.1	tRNA1(Val) (adenine(37)-N6)-methyltransferase	EC2.1.1.223
BcellWH2_05079	1.27	6.06	0.0469281	0.271954	ALJ62287.1	hypothetical protein	Unknown
BcellWH2_04129	-0.8	7.95	0.0258808	0.20416	ALJ61349.1	Alpha/beta hydrolase family protein	NOT DEFINED
BcellWH2_04655	2.52	4.14	0.0562448	0.299716	ALJ61869.1	Cyclic nucleotide-binding domain protein	Unknown
BcellWH2_05517	4.12	0.05	0.0316117	0.223499	ALJ62715.1	hypothetical protein	Unknown
BcellWH2_00831	3.92	2.55	0.0471744	0.273049	ALJ58094.1	hypothetical protein
BcellWH2_04058	2.07	4.79	0.0568318	0.300805	ALJ61278.1	Phosphoglycolate phosphatase	EC3.1.3.18		BcellWH2:83
BcellWH2_02715	-0.44	9.4	0.0143426	0.147524	ALJ59954.1	Sensor histidine kinase TmoS	Unknown		BcellWH2:49
BcellWH2_01159	-0.84	8.38	0.0214072	0.182962	ALJ58421.1	Magnesium and cobalt efflux protein CorC	NOT DEFINED
BcellWH2_04712	-0.71	7.76	0.0278064	0.210712	ALJ61925.1	hypothetical protein	Unknown
BcellWH2_02969	-0.49	9.46	0.0147561	0.148674	ALJ60207.1	Sensor histidine kinase TmoS	Unknown		BcellWH2:55	BcellWH2:64
BcellWH2_02917	2.56	4.37	0.0580528	0.30315	ALJ60156.1	LOG family protein YvdD	NOT DEFINED
BcellWH2_04715	2.06	4.71	0.058422	0.303785	ALJ61928.1	transcriptional activator FtrA	NOT DEFINED
BcellWH2_02409	-0.62	8.74	0.0183103	0.169075	ALJ59648.1	hypothetical protein	Unknown
BcellWH2_01074	-2.05	4.76	0.0585929	0.304299	ALJ58336.1	Histidinol dehydrogenase	EC1.1.1.23
BcellWH2_01602	3.58	1.96	0.0478288	0.274463	ALJ58855.1	hypothetical protein	NOT DEFINED
BcellWH2_00180	0.64	7.79	0.0259739	0.20416	ALJ57456.1	hypothetical protein	NOT DEFINED
BcellWH2_05377	-0.78	7.24	0.0321046	0.225398	ALJ62577.1	hypothetical protein	NOT DEFINED
BcellWH2_04286	-0.91	7.48	0.0316593	0.223499	ALJ61503.1	putative ABC transporter ATP-binding protein YxlF	NOT DEFINED
BcellWH2_02018	-1.44	6.07	0.0530326	0.291006	ALJ59263.1	Nitrogen regulation protein NR(I)	NOT DEFINED
BcellWH2_02197	-0.9	7.18	0.0322397	0.225963	ALJ59438.1	hypothetical protein	Unknown
BcellWH2_05534	-3.01	3.71	0.0562294	0.299716	ALJ62732.1	1,4-alpha-glucan branching enzyme GlgB	EC2.4.1.18	GH13_8
BcellWH2_02985	1.33	6.43	0.0429688	0.260454	ALJ60223.1	putative glycerophosphoryl diester phosphodiesterase 1	EC3.1.4.46		BcellWH2:57	BcellWH2:66
BcellWH2_02294	0.53	8.49	0.0209296	0.180831	ALJ59534.1	Y_Y_Y domain protein	NOT DEFINED		BcellWH2:37	BcellWH2:41
BcellWH2_04042	-0.88	7.11	0.0354251	0.238701	ALJ61262.1	Unsaturated rhamnogalacturonyl hydrolase YteR	EC3.2.1.172	GH105	BcellWH2:83
BcellWH2_04542	1.02	7.28	0.032864	0.228277	ALJ61757.1	Glutamate 2,3-aminomutase	EC5.4.3.2
BcellWH2_00984	-2.1	4.85	0.0618581	0.311606	ALJ58246.1	hypothetical protein	Unknown
BcellWH2_01393	-1.65	5.08	0.0612534	0.310088	ALJ58654.1	hypothetical protein	Unknown
BcellWH2_01514	-1.13	6.35	0.0457154	0.269194	ALJ58769.1	Vitamin B12 import system permease protein BtuC	NOT DEFINED
BcellWH2_02069	-2.2	4.77	0.0624528	0.313	ALJ59312.1	hypothetical protein	Unknown
BcellWH2_02427	-2.21	4.49	0.0626395	0.313	ALJ59666.1	hypothetical protein	Unknown
BcellWH2_01770	2.36	5.28	0.0625754	0.313	ALJ59023.1	Pyridoxine 5'-phosphate synthase	EC2.6.99.2
BcellWH2_00047	1.71	6.55	0.0492118	0.277226	ALJ57323.1	transcriptional regulator NarL	NOT DEFINED
BcellWH2_04013	1.32	6.27	0.0515134	0.284642	ALJ61233.1	recombination protein F	Unknown
BcellWH2_03461	0.95	7.42	0.0310762	0.223499	ALJ60690.1	hypothetical protein	Unknown
BcellWH2_03825	-1.12	6.08	0.0491946	0.277226	ALJ61047.1	Outer membrane protein TolC precursor	NOT DEFINED
BcellWH2_00383	1.68	5.96	0.0600953	0.308727	ALJ57658.1	hypothetical protein
BcellWH2_02992	3.91	0.42	0.039986	0.25134	ALJ60230.1	hypothetical protein	Unknown
BcellWH2_03639	-0.52	8.89	0.0185955	0.170478	ALJ60862.1	Pectate lyase superfamily protein	Unknown			BcellWH2:85
BcellWH2_01561	-3.47	2.11	0.0558119	0.299716	ALJ58815.1	hypothetical protein
BcellWH2_05552	-4.07	0.97	0.0448535	0.265765	ALJ62750.1	hypothetical protein	Unknown
BcellWH2_02600	1.48	5.58	0.0596918	0.307987	ALJ59839.1	hypothetical protein	Unknown
BcellWH2_03954	-0.81	7.26	0.0347695	0.235663	ALJ61174.1	GDP-mannose-dependent alpha-(1-6)-phosphatidylinositol monomannoside mannosyltransferase	EC2.4.1.52	GT4
BcellWH2_02934	-0.57	8.78	0.0204849	0.178566	ALJ60172.1	hypothetical protein	Unknown
BcellWH2_02015	0.58	8.26	0.0238271	0.194547	ALJ59260.1	Potassium-transporting ATPase B chain	EC3.6.3.12
BcellWH2_03760	3.22	2.75	0.0573514	0.301475	ALJ60982.1	hypothetical protein	Unknown
BcellWH2_02868	-1.11	6.7	0.0481118	0.274463	ALJ60107.1	(Dimethylallyl)adenosine tRNA methylthiotransferase MiaB	EC2.8.4.3
BcellWH2_02412	3.44	2.39	0.0568212	0.300805	ALJ59651.1	hypothetical protein	Unknown
BcellWH2_02728	-0.84	7.3	0.0335246	0.231217	ALJ59967.1	Evolved beta-galactosidase subunit alpha	EC3.2.1.23	GH2	BcellWH2:49
BcellWH2_05271	-1	7.02	0.0396983	0.250497	ALJ62473.1	Ferredoxin-dependent glutamate synthase 1	EC1.4.1.13:EC1.4.1.14
BcellWH2_04833	-1.95	4.93	0.0649787	0.319955	ALJ62042.1	hypothetical protein			BcellWH2:90
BcellWH2_02136	-1.75	5.47	0.0631978	0.314633	ALJ59379.1	hypothetical protein
BcellWH2_04909	-3.62	2.44	0.0582019	0.303419	ALJ62118.1	Helix-turn-helix domain protein	Unknown
BcellWH2_01333	0.62	8.66	0.0210552	0.181363	ALJ58594.1	hypothetical protein	NOT DEFINED
BcellWH2_03621	-0.56	8.28	0.0236191	0.193848	ALJ60844.1	Neutral/alkaline non-lysosomal ceramidase	EC3.5.1.23
BcellWH2_03481	0.46	8.93	0.0187378	0.170478	ALJ60710.1	DNA-binding transcriptional regulator AraC	Unknown		BcellWH2:73
BcellWH2_05181	3.64	2.32	0.059238	0.306818	ALJ62389.1	Malonyl-[acyl-carrier protein] O-methyltransferase	EC2.1.1.197
BcellWH2_02040	-0.68	7.97	0.0278517	0.210712	ALJ59285.1	putative lipoprotein YbbD precursor	EC3.2.1.52	GH3
BcellWH2_04642	2.18	5.22	0.066988	0.325345	ALJ61856.1	hypothetical protein	Unknown
BcellWH2_05130	0.56	8.25	0.0252411	0.201929	ALJ62338.1	hypothetical protein	NOT DEFINED
BcellWH2_01212	-1.02	6.82	0.0421058	0.257635	ALJ58474.1	hypothetical protein	Unknown
BcellWH2_03889	1.15	6.54	0.0483632	0.275353	ALJ61110.1	Major cardiolipin synthase ClsA	EC2.7.8.-
BcellWH2_01385	1.12	6.36	0.0491644	0.277226	ALJ58646.1	hypothetical protein	Unknown
BcellWH2_04924	2.14	4.77	0.0694205	0.331211	ALJ62133.1	hypothetical protein
BcellWH2_02730	0.67	8	0.0266846	0.20665	ALJ59969.1	Suppressor of fused protein (SUFU)	EC3.4.21.105		BcellWH2:50
BcellWH2_02757	0.84	6.85	0.0395945	0.250497	ALJ59996.1	Periplasmic beta-glucosidase precursor	EC3.2.1.21	GH3	BcellWH2:51	BcellWH2:60
BcellWH2_03911	0.59	8.26	0.0243081	0.19712	ALJ61132.1	3-oxoacyl-[acyl-carrier-protein] synthase 2	EC2.3.1.41
BcellWH2_02926	0.95	7.04	0.0401463	0.251351	ALJ60164.1	hypothetical protein	EC3.1.1.11
BcellWH2_05363	-3.63	2.26	0.0605384	0.309332	ALJ62563.1	tRNA (guanine-N(1)-)-methyltransferase	EC2.1.1.228
BcellWH2_00305	1.82	5.11	0.0670806	0.325345	ALJ57581.1	hypothetical protein	Unknown
BcellWH2_00972	-0.97	7.2	0.0406262	0.252691	ALJ58234.1	putative undecaprenyl-phosphate N-acetylglucosaminyl 1-phosphate transferase	EC2.4.1.-
BcellWH2_03946	0.95	6.72	0.0438022	0.262482	ALJ61166.1	hypothetical protein	Unknown
BcellWH2_02261	-0.79	7.36	0.0342074	0.233219	ALJ59502.1	hypothetical protein	Unknown
BcellWH2_01667	0.82	6.76	0.0425474	0.258588	ALJ58920.1	hypothetical protein	Unknown		BcellWH2:17	BcellWH2:19
BcellWH2_01668	-0.44	9.52	0.0158321	0.155828	ALJ58921.1	Sensor histidine kinase TodS	Unknown		BcellWH2:17	BcellWH2:19
BcellWH2_03823	0.91	7.35	0.0368679	0.242998	ALJ61045.1	Helix-turn-helix domain protein	Unknown
BcellWH2_05282	0.6	7.82	0.0304283	0.221093	ALJ62484.1	L-fucose-proton symporter	NOT DEFINED
BcellWH2_01710	-0.68	7.66	0.0327078	0.227952	ALJ58963.1	Arylsulfatase	EC3.5.99.6		BcellWH2:19	BcellWH2:23
BcellWH2_03470	-1.07	6.49	0.0554661	0.299177	ALJ60699.1	hypothetical protein	Unknown		BcellWH2:72	BcellWH2:81
BcellWH2_04735	-0.96	6.9	0.0415882	0.256659	ALJ61947.1	HTH-type transcriptional repressor CytR	NOT DEFINED
BcellWH2_05516	1.78	5.36	0.0693672	0.331211	ALJ62714.1	HTH-type transcriptional activator Btr	NOT DEFINED
BcellWH2_03964	0.78	7.3	0.036869	0.242998	ALJ61184.1	hypothetical protein	Unknown
BcellWH2_01563	0.45	9.48	0.0166301	0.160297	ALJ58817.1	Pectate lyase superfamily protein	EC3.2.1.45
BcellWH2_02321	-3.68	1.29	0.0579631	0.303015	ALJ59561.1	Acetylornithine deacetylase	EC3.5.1.16
BcellWH2_00157	0.7	7.94	0.03092	0.222962	ALJ57433.1	Tyrosine recombinase XerD	NOT DEFINED
BcellWH2_00681	0.8	7	0.0415033	0.256468	ALJ57948.1	Aspartate/alanine antiporter	NOT DEFINED
BcellWH2_05298	3.31	2.86	0.0698005	0.331692	ALJ62500.1	hypothetical protein
BcellWH2_02005	0.7	8.17	0.0277669	0.210712	ALJ59250.1	Prolyl tripeptidyl peptidase precursor	EC3.4.14.5		BcellWH2:27
BcellWH2_02732	1.5	5.52	0.0656073	0.320747	ALJ59971.1	hypothetical protein			BcellWH2:50
BcellWH2_00721	3.76	0.55	0.0562295	0.299716	ALJ57985.1	antitoxin HipB	NOT DEFINED
BcellWH2_00911	-2.43	4.18	0.0775399	0.351593	ALJ58173.1	Sporulation related domain protein	Unknown
BcellWH2_01365	-1.29	5.76	0.0634277	0.315281	ALJ58626.1	hypothetical protein	Unknown
BcellWH2_03486	3	3.27	0.0748069	0.345075	ALJ60715.1	Bacterial DNA-binding protein	Unknown
BcellWH2_05049	-0.8	7.29	0.039333	0.250018	ALJ62257.1	Formyltetrahydrofolate deformylase	EC3.5.1.10
BcellWH2_04861	0.6	8.34	0.0260148	0.20416	ALJ62070.1	SusD family protein	NOT DEFINED		BcellWH2:92	BcellWH2:110
BcellWH2_02847	-0.51	8.73	0.0218831	0.186026	ALJ60086.1	Alpha-galactosidase A precursor	EC3.2.1.22	CBM51-GH27
BcellWH2_01378	1.28	5.97	0.0595975	0.307987	ALJ58639.1	Motility protein B	NOT DEFINED
BcellWH2_00227	3.74	0.97	0.0603627	0.308766	ALJ57503.1	hypothetical protein	Unknown
BcellWH2_03394	3.21	3	0.0748606	0.345075	ALJ60627.1	UDP-3-O-[3-hydroxymyristoyl] glucosamine N-acyltransferase	Unknown
BcellWH2_02574	-1.09	6.3	0.0544914	0.295935	ALJ59813.1	O-Antigen ligase	EC2.4.1.-
BcellWH2_02291	0.58	7.93	0.0300631	0.220269	ALJ59531.1	Periplasmic beta-glucosidase precursor	EC3.2.1.21	GH3	BcellWH2:37	BcellWH2:41
BcellWH2_01991	1.18	5.69	0.064234	0.31829	ALJ59236.1	NigD-like protein	Unknown
BcellWH2_05464	1.56	5.74	0.0722667	0.338877	ALJ62662.1	hypothetical protein	Unknown
BcellWH2_03438	-2.88	3.14	0.0777511	0.351865	ALJ60667.1	Methionine aminopeptidase 1	EC3.4.11.18
BcellWH2_01974	0.7	7.78	0.0315958	0.223499	ALJ59219.1	Penicillin-binding protein 2B	EC3.4.16.4
BcellWH2_00339	1.87	5.06	0.0754674	0.346494	ALJ57614.1	Cobyrinic acid A,C-diamide synthase	EC6.3.5.9:EC6.3.5.11
BcellWH2_04223	-1.16	6.14	0.0592716	0.306818	ALJ61440.1	L-rhamnose mutarotase	EC5.1.3.32		BcellWH2:85	BcellWH2:100
BcellWH2_03153	-0.58	8.67	0.023972	0.195364	ALJ60390.1	Exo-poly-alpha-D-galacturonosidase precursor	EC3.2.1.67	GH28	BcellWH2:63	BcellWH2:72
BcellWH2_02399	-0.54	8.71	0.0231446	0.191826	ALJ59638.1	hypothetical protein	Unknown
BcellWH2_01967	-1.64	5.14	0.0760783	0.348289	ALJ59212.1	hypothetical protein	Unknown
BcellWH2_02643	-0.43	9.56	0.0171331	0.163487	ALJ59882.1	alpha-glucosidase	NOT DEFINED	GH63	BcellWH2:47	BcellWH2:53
BcellWH2_03231	-1.03	6.72	0.0501762	0.279856	ALJ60465.1	putative sugar kinase YdjH	EC2.7.1.4
BcellWH2_01067	0.49	8.46	0.0250455	0.201254	ALJ58329.1	Aspartate/alanine antiporter	NOT DEFINED
BcellWH2_05542	-2.15	4.63	0.0816289	0.359834	ALJ62740.1	hypothetical protein	Unknown
BcellWH2_01061	1.98	5.99	0.0781759	0.351865	ALJ58323.1	PAP2 superfamily protein	Unknown
BcellWH2_01648	0.51	8.82	0.0222921	0.188156	ALJ58901.1	Beta-galactosidase	EC3.2.1.23	GH2	BcellWH2:17	BcellWH2:18
BcellWH2_04549	-0.64	7.95	0.0316003	0.223499	ALJ61764.1	Radical SAM superfamily protein	Unknown
BcellWH2_02306	0.67	7.65	0.0359997	0.239931	ALJ59546.1	hypothetical protein	Unknown
BcellWH2_04377	-3.43	2.41	0.0709393	0.334313	ALJ61594.1	putative NAD-dependent oxidoreductase	EC1.1.1.100
BcellWH2_04332	-0.92	6.67	0.0509511	0.282731	ALJ61549.1	Ribosomal RNA small subunit methyltransferase E	EC2.1.1.193
BcellWH2_03023	-0.55	8.48	0.0261032	0.204354	ALJ60261.1	Alpha-L-fucosidase	EC3.2.1.51	GH29
BcellWH2_05227	3.44	1.25	0.0687323	0.32925	ALJ62429.1	hypothetical protein	Unknown
BcellWH2_02108	-2.87	3.33	0.0833482	0.363025	ALJ59351.1	Pyrroline-5-carboxylate reductase	EC1.5.1.2
BcellWH2_04424	0.71	7.68	0.0358451	0.23991	ALJ61641.1	Tetratricopeptide repeat protein	Unknown
BcellWH2_00409	2.72	3.06	0.081089	0.359244	ALJ57684.1	lineage-specific thermal regulator protein	NOT DEFINED
BcellWH2_05485	3.01	2.71	0.0803636	0.357573	ALJ62683.1	Xylose isomerase	EC5.3.1.5
BcellWH2_04146	-0.83	7.95	0.0331026	0.229305	ALJ61366.1	metallo-beta-lactamase/flavodoxin domain-containing protein	EC2.5.1.105
BcellWH2_00215	1.44	5.42	0.072832	0.340647	ALJ57491.1	hypothetical protein	Unknown
BcellWH2_01570	0.51	9.04	0.021182	0.181363	ALJ58824.1	TonB dependent receptor	Unknown		BcellWH2:15	BcellWH2:16
BcellWH2_00225	-3.97	1.41	0.0674814	0.326297	ALJ57501.1	hypothetical protein	Unknown
BcellWH2_04239	-3.72	0.71	0.0670956	0.325345	ALJ61456.1	hypothetical protein	Unknown
BcellWH2_00082	-3.62	0.03	0.0660192	0.321767	ALJ57358.1	ATP synthase subunit b	NOT DEFINED
BcellWH2_05270	-1.74	5.44	0.0775219	0.351593	ALJ62472.1	Glutamate synthase [NADPH] small chain	EC1.4.1.13:EC1.4.1.14
BcellWH2_02634	-3.63	0.66	0.0682674	0.327897	ALJ59873.1	hypothetical protein
BcellWH2_01247	-1.68	4.91	0.0823083	0.360488	ALJ58509.1	Anaerobic sulfite reductase subunit A	EC1.12.98.4
BcellWH2_04381	-3.32	2.83	0.0816015	0.359834	ALJ61598.1	UDP-4-amino-4-deoxy-L-arabinose--oxoglutarate aminotransferase	EC2.6.1.102
BcellWH2_00427	2.39	3.74	0.0878278	0.373264	ALJ57702.1	Gram-negative bacterial tonB protein	NOT DEFINED
BcellWH2_04774	1.05	6.07	0.0619114	0.311606	ALJ61985.1	3 beta-hydroxysteroid dehydrogenase/Delta 5-->4-isomerase	NOT DEFINED
BcellWH2_02559	-2.55	3.56	0.0877711	0.373264	ALJ59798.1	Glucuronoxylanase XynC precursor	EC3.2.1.45	GH30_3
BcellWH2_03891	3.02	3.37	0.0877977	0.373264	ALJ61112.1	hypothetical protein	Unknown
BcellWH2_00473	-0.8	7.12	0.0456992	0.269194	ALJ57741.1	Signal transduction histidine-protein kinase BarA	EC2.7.13.3
BcellWH2_03994	-1.07	6.26	0.057221	0.301123	ALJ61214.1	putative DMT superfamily transporter inner membrane protein	Unknown
BcellWH2_03555	-0.85	7.16	0.046425	0.271022	ALJ60778.1	putative ABC transporter ATP-binding protein	NOT DEFINED
BcellWH2_02790	3.46	1.25	0.0749406	0.345075	ALJ60029.1	hypothetical protein
BcellWH2_03463	0.56	8.4	0.0275589	0.210712	ALJ60692.1	Beta-hexosaminidase	EC3.2.1.52	GH20	BcellWH2:72
BcellWH2_05299	1.24	5.98	0.0697225	0.331653	ALJ62501.1	hypothetical protein	Unknown
BcellWH2_03021	3.37	2.12	0.0874425	0.373264	ALJ60259.1	L-fucose mutarotase	EC5.1.3.32
BcellWH2_00652	0.75	7.46	0.0393395	0.250018	ALJ57919.1	hypothetical protein	Unknown
BcellWH2_03337	-0.73	7.17	0.0447784	0.265651	ALJ60570.1	hypothetical protein	NOT DEFINED
BcellWH2_00476	1.52	5.91	0.0735726	0.342426	ALJ57744.1	Ribosomal large subunit pseudouridine synthase D	EC5.4.99.23
BcellWH2_01157	-0.59	8.3	0.0296399	0.219733	ALJ58419.1	hypothetical protein	Unknown
BcellWH2_03026	-0.57	8.67	0.0264884	0.205675	ALJ60264.1	Xylan 1,4-beta-xylosidase precursor	EC3.2.1.21	GH3
BcellWH2_00256	0.89	6.98	0.0474733	0.274111	ALJ57532.1	site-specific tyrosine recombinase XerD	Unknown
BcellWH2_04431	1.94	4.42	0.0918584	0.382234	ALJ61648.1	hypothetical protein	Unknown
BcellWH2_03578	0.39	9.37	0.0195984	0.174884	ALJ60801.1	Fibrobacter succinogenes major domain (Fib_succ_major)	Unknown
BcellWH2_01949	-2.95	3.25	0.0933637	0.38546	ALJ59195.1	hypothetical protein	Unknown
BcellWH2_00998	1.75	4.89	0.090391	0.378987	ALJ58260.1	Phosphopantetheine attachment site	NOT DEFINED
BcellWH2_05527	1.01	7.04	0.0537691	0.293353	ALJ62725.1	hypothetical protein	Unknown
BcellWH2_05410	-0.57	8.5	0.0283224	0.211993	ALJ62610.1	Sensor protein ZraS	EC2.7.13.3
BcellWH2_04171	2.25	4.06	0.0955596	0.389785	ALJ61390.1	HEPN domain protein	NOT DEFINED
BcellWH2_00177	0.82	6.64	0.0537209	0.293353	ALJ57453.1	hypothetical protein	Unknown
BcellWH2_00585	3.75	1.15	0.0782662	0.351865	ALJ57853.1	hypothetical protein
BcellWH2_00874	-3.31	1.79	0.0892047	0.375739	ALJ58136.1	50S ribosomal protein L35	NOT DEFINED
BcellWH2_01137	0.65	7.31	0.0408153	0.253204	ALJ58399.1	SusD family protein	NOT DEFINED		BcellWH2:10	BcellWH2:10
BcellWH2_02393	1.89	4.68	0.093942	0.386297	ALJ59632.1	hypothetical protein	Unknown
BcellWH2_05355	3.61	1.64	0.0851522	0.369875	ALJ62557.1	ATP-dependent Clp protease ATP-binding subunit ClpC	NOT DEFINED
BcellWH2_00600	2.81	2.69	0.0950362	0.388651	ALJ57868.1	Iron-sulfur flavoprotein	Unknown
BcellWH2_00023	1.92	4.93	0.0912595	0.380408	ALJ57300.1	hypothetical protein	Unknown
BcellWH2_00245	-2.79	3.26	0.0979851	0.394037	ALJ57521.1	hypothetical protein	Unknown
BcellWH2_04871	0.92	6.78	0.0541992	0.294685	ALJ62080.1	transcriptional activator FtrB	NOT DEFINED
BcellWH2_03967	1.12	6.09	0.0614829	0.310485	ALJ61187.1	hypothetical protein	Unknown
BcellWH2_05370	1.43	5.21	0.089078	0.375636	ALJ62570.1	hypothetical protein	EC2.1.1.72
BcellWH2_04278	2.63	3.52	0.0992918	0.396244	ALJ61495.1	hypothetical protein
BcellWH2_01629	-1.51	7	0.0768319	0.349717	ALJ58882.1	Elongation factor G	NOT DEFINED
BcellWH2_05379	-2.66	3.09	0.0993419	0.396244	ALJ62579.1	hypothetical protein	Unknown
BcellWH2_00660	-0.92	6.86	0.0527248	0.289651	ALJ57927.1	Cytochrome bd ubiquinol oxidase subunit 1	EC1.10.3.14
BcellWH2_05319	2.97	-0.06	0.0819727	0.360274	ALJ62521.1	hypothetical protein	Unknown
BcellWH2_05055	-3	1.71	0.0946464	0.388058	ALJ62263.1	Lysine-sensitive aspartokinase 3	EC2.7.2.4
BcellWH2_02117	0.73	7.4	0.0425538	0.258588	ALJ59360.1	Unsaturated rhamnogalacturonyl hydrolase YesR	EC3.2.1.172	GH105	BcellWH2:30	BcellWH2:34
BcellWH2_04073	-0.48	8.89	0.0243892	0.197441	ALJ61293.1	O-Antigen ligase	EC2.4.1.-
BcellWH2_02670	2.45	3.83	0.100719	0.399845	ALJ59909.1	FHA domain protein	EC4.6.1.1
BcellWH2_00317	-0.58	8.07	0.03445	0.234536	ALJ57593.1	Multidrug export protein MepA	Unknown
BcellWH2_01959	-0.76	7.23	0.048111	0.274463	ALJ59205.1	hypothetical protein	Unknown
BcellWH2_04076	-1.52	5.75	0.0876583	0.373264	ALJ61296.1	coproporphyrinogen III oxidase	NOT DEFINED
BcellWH2_02735	0.59	9.23	0.0211732	0.181363	ALJ59974.1	hypothetical protein	EC3.2.1.51	GH95	BcellWH2:50	BcellWH2:59
BcellWH2_01973	-2.87	3.43	0.101676	0.4023	ALJ59218.1	hypothetical protein	Unknown
BcellWH2_05382	2.49	3.86	0.102094	0.402371	ALJ62582.1	GtrA-like protein	EC2.4.1.83
BcellWH2_04852	-1.19	6.24	0.0782055	0.351865	ALJ62061.1	hypothetical protein	Unknown		BcellWH2:91	BcellWH2:109
BcellWH2_02900	-3.12	0.9	0.0913786	0.380571	ALJ60139.1	hypothetical protein	Unknown
BcellWH2_04093	-0.71	7.55	0.0410248	0.254172	ALJ61313.1	Fibronectin type III domain protein	Unknown		BcellWH2:84	BcellWH2:96
BcellWH2_01155	1.97	4.77	0.0941652	0.386419	ALJ58417.1	Methionine gamma-lyase	EC2.5.1.49
BcellWH2_04225	-0.95	6.77	0.0546308	0.296015	ALJ61442.1	Rhamnogalacturonan endolyase YesW precursor	EC4.2.2.23	PL11_1	BcellWH2:85	BcellWH2:100
BcellWH2_02493	2.04	4.54	0.102078	0.402371	ALJ59732.1	hypothetical protein	Unknown
BcellWH2_00343	-0.68	7.72	0.0387944	0.248787	ALJ57618.1	hypothetical protein	NOT DEFINED
BcellWH2_04158	0.94	6.79	0.0596604	0.307987	ALJ61378.1	Bifunctional NAD(P)H-hydrate repair enzyme Nnr	EC4.2.1.136|EC5.1.99.6
BcellWH2_03813	-0.59	8.14	0.0334381	0.231217	ALJ61035.1	Streptopain precursor	EC3.4.22.10
BcellWH2_00518	0.87	6.76	0.0548307	0.29676	ALJ57786.1	Pyridoxine/pyridoxamine 5'-phosphate oxidase	EC1.4.3.5
BcellWH2_00238	1.12	6.08	0.0709732	0.334313	ALJ57514.1	hypothetical protein	Unknown
BcellWH2_00611	-2.28	4.67	0.0948647	0.388419	ALJ57879.1	Phosphoserine aminotransferase	EC2.6.1.52
BcellWH2_04085	-1.16	5.98	0.0780623	0.351865	ALJ61305.1	CAAX amino terminal protease self- immunity	NOT DEFINED
BcellWH2_01963	1.54	5.06	0.0975788	0.393317	ALJ59208.1	hypothetical protein	Unknown
BcellWH2_02849	-0.51	8.71	0.0283281	0.211993	ALJ60088.1	Arabinoxylan arabinofuranohydrolase precursor	EC3.2.1.55	GH27-GH43_29-CBM6
BcellWH2_02206	-0.59	8.38	0.031279	0.223499	ALJ59447.1	peptidase PmbA	NOT DEFINED
BcellWH2_00710	-2.97	2.85	0.106253	0.407846	ALJ57974.1	hypothetical protein	Unknown
BcellWH2_03523	0.73	7.88	0.0375301	0.244306	ALJ60746.1	putative ABC transporter ATP-binding protein YbhF	NOT DEFINED
BcellWH2_02780	0.63	8.19	0.033587	0.231312	ALJ60019.1	hypothetical protein	Unknown
BcellWH2_03949	1.88	4.58	0.103968	0.404631	ALJ61169.1	hypothetical protein	Unknown
BcellWH2_02510	-1.2	6.09	0.0795339	0.355212	ALJ59749.1	Multidrug resistance protein MdtE precursor	NOT DEFINED
BcellWH2_00286	1.43	5.18	0.08537	0.370144	ALJ57562.1	hypothetical protein	Unknown
BcellWH2_02035	-0.78	7.12	0.0541353	0.294674	ALJ59280.1	hypothetical protein
BcellWH2_00525	3.3	0.08	0.0904401	0.378987	ALJ57793.1	putative transcriptional regulatory protein	Unknown
BcellWH2_01344	1.24	5.94	0.0781232	0.351865	ALJ58605.1	Aminopeptidase E	EC3.4.22.40
BcellWH2_02424	0.58	8.12	0.0348318	0.235663	ALJ59663.1	Periplasmic beta-glucosidase precursor	EC3.2.1.21	GH3
BcellWH2_01727	0.62	8.1	0.0365145	0.242342	ALJ58980.1	hypothetical protein	Unknown
BcellWH2_04921	-0.8	7.38	0.0478182	0.274463	ALJ62130.1	hypothetical protein	Unknown
BcellWH2_05180	3.4	1.78	0.102228	0.402475	ALJ62388.1	ATP-dependent dethiobiotin synthetase BioD	EC6.3.3.3
BcellWH2_04933	-0.63	7.64	0.0397491	0.250497	ALJ62142.1	Unsaturated rhamnogalacturonyl hydrolase YteR	EC3.2.1.172	GH105
BcellWH2_02778	-2.6	3.26	0.10991	0.414516	ALJ60017.1	hypothetical protein	Unknown
BcellWH2_03729	2.69	2.66	0.106875	0.408608	ALJ60951.1	DNA primase TraC	NOT DEFINED
BcellWH2_00117	1.16	6.47	0.0781152	0.351865	ALJ57393.1	hypothetical protein	Unknown
BcellWH2_04318	-2.19	4.64	0.106815	0.408608	ALJ61535.1	Xylosidase/arabinosidase	EC3.2.1.55	GH43_1	BcellWH2:87
BcellWH2_04328	-0.7	7.93	0.0389304	0.249323	ALJ61545.1	Penicillin-binding protein 1F	EC2.4.1.129	GT51
BcellWH2_00598	0.73	6.93	0.0522125	0.287835	ALJ57866.1	hypothetical protein	Unknown
BcellWH2_02572	2.33	3.63	0.111186	0.41584	ALJ59811.1	hypothetical protein	Unknown
BcellWH2_02132	2.92	2.48	0.110888	0.41584	ALJ59375.1	ORF6N domain protein	Unknown
BcellWH2_04342	-1.85	4.77	0.105081	0.405973	ALJ61559.1	hypothetical protein	Unknown
BcellWH2_00265	-0.89	6.54	0.0675666	0.326297	ALJ57541.1	hypothetical protein	Unknown
BcellWH2_03488	3.06	0.08	0.0980946	0.394037	ALJ60717.1	hypothetical protein	Unknown
BcellWH2_01725	-3.58	1.49	0.105442	0.406046	ALJ58978.1	hypothetical protein
BcellWH2_01615	1.57	5.92	0.087119	0.373264	ALJ58868.1	Methylglyoxal synthase	EC4.2.3.3
BcellWH2_03585	1.3	5.83	0.0811173	0.359244	ALJ60808.1	Lipoate-protein ligase LplJ	EC6.3.1.20
BcellWH2_04745	2.85	3	0.11389	0.420492	ALJ61957.1	hypothetical protein
BcellWH2_03727	-2.04	4.22	0.113972	0.420492	ALJ60949.1	hypothetical protein	Unknown
BcellWH2_00903	0.84	6.61	0.0601706	0.308766	ALJ58165.1	Unsaturated chondroitin disaccharide hydrolase	EC4.2.2.5	GH88	BcellWH2:4	BcellWH2:4
BcellWH2_04205	-3.07	1.94	0.111539	0.41584	ALJ61422.1	hypothetical protein	Unknown
BcellWH2_01150	0.5	8.75	0.0269474	0.207207	ALJ58412.1	2-dehydro-3-deoxygluconokinase	EC2.7.1.45
BcellWH2_04999	-2.95	1.87	0.109429	0.414017	ALJ62208.1	hypothetical protein	Unknown
BcellWH2_03265	-0.64	7.97	0.0380268	0.245855	ALJ60499.1	FAD dependent oxidoreductase	Unknown			BcellWH2:76
BcellWH2_03254	-1.71	4.76	0.103832	0.404631	ALJ60488.1	hypothetical protein	Unknown		BcellWH2:67	BcellWH2:76
BcellWH2_00846	1.26	5.73	0.0872975	0.373264	ALJ58109.1	hypothetical protein	Unknown
BcellWH2_02820	0.56	8.13	0.0359624	0.239931	ALJ60059.1	NHL repeat protein	Unknown		BcellWH2:52	BcellWH2:61
BcellWH2_03701	0.75	7.2	0.0509892	0.282731	ALJ60924.1	HTH-type transcriptional activator RhaR	NOT DEFINED
BcellWH2_00500	3.19	0.59	0.104522	0.405461	ALJ57768.1	Transcription antitermination protein RfaH	NOT DEFINED
BcellWH2_05003	-0.66	7.68	0.0424891	0.258588	ALJ62212.1	hypothetical protein	Unknown
BcellWH2_04273	-0.4	9.24	0.0234825	0.193611	ALJ61490.1	hypothetical protein	Unknown
BcellWH2_04154	-0.61	7.63	0.0436146	0.261687	ALJ61374.1	hypothetical protein	Unknown
BcellWH2_01897	-0.6	7.83	0.0401083	0.251351	ALJ59148.1	hypothetical protein	Unknown		BcellWH2:24	BcellWH2:28
BcellWH2_05200	0.81	6.82	0.057644	0.301986	ALJ62403.1	2,3-bisphosphoglycerate-dependent phosphoglycerate mutase	EC5.4.2.11
BcellWH2_03747	-3.27	1.06	0.111344	0.41584	ALJ60969.1	Type IV secretion system protein virB4	NOT DEFINED
BcellWH2_01466	-3.29	1.94	0.116711	0.425579	ALJ58727.1	3-isopropylmalate dehydrogenase	EC1.1.1.85
BcellWH2_02318	-1.82	4.8	0.107053	0.408608	ALJ59558.1	Long-chain-fatty-acid--CoA ligase FadD15	EC6.2.1.3
BcellWH2_04564	2.28	3.95	0.119808	0.431637	ALJ61779.1	Methylated-DNA--protein-cysteine methyltransferase	NOT DEFINED
BcellWH2_01930	-3.23	1.35	0.116817	0.425579	ALJ59176.1	hypothetical protein			BcellWH2:25
BcellWH2_00360	-0.99	6.56	0.0671715	0.325381	ALJ57635.1	Cobalt-precorrin-4 C(11)-methyltransferase	EC2.1.1.133:EC2.1.1.271
BcellWH2_04661	2.69	3.03	0.121245	0.435069	ALJ61875.1	hypothetical protein
BcellWH2_04264	0.42	9.23	0.0241594	0.196249	ALJ61481.1	Retaining alpha-galactosidase precursor	EC3.2.1.20	GH97	BcellWH2:86	BcellWH2:101
BcellWH2_03789	0.84	6.68	0.0599348	0.308388	ALJ61011.1	RteC protein	Unknown
BcellWH2_03388	-2.47	2.6	0.122619	0.43732	ALJ60621.1	hypothetical protein	Unknown
BcellWH2_00176	1.04	6.09	0.0790074	0.354462	ALJ57452.1	hypothetical protein	Unknown
BcellWH2_03858	-2.76	3.06	0.123636	0.438773	ALJ61080.1	Transcriptional regulatory protein ZraR	NOT DEFINED
BcellWH2_05304	1	6.47	0.0654724	0.320747	ALJ62506.1	Vitamin K epoxide reductase family protein	Unknown
BcellWH2_00968	2.66	4.11	0.123821	0.439001	ALJ58230.1	Outer membrane protein transport protein (OMPP1/FadL/TodX)	Unknown
BcellWH2_04991	1.11	6.42	0.0731631	0.341188	ALJ62200.1	tRNA modification GTPase MnmE	EC4.1.99.19
BcellWH2_05481	1.41	5.44	0.101096	0.400353	ALJ62679.1	oxidative stress defense protein	NOT DEFINED
BcellWH2_04217	-2.82	2.19	0.123338	0.438043	ALJ61434.1	hypothetical protein			BcellWH2:85
BcellWH2_01819	1.51	4.73	0.114668	0.421427	ALJ59072.1	exodeoxyribonuclease VII small subunit	EC3.1.11.6
BcellWH2_01048	-0.64	7.49	0.0464935	0.271085	ALJ58310.1	Transcriptional regulatory protein SrrA	NOT DEFINED
BcellWH2_03713	1.76	5.57	0.111613	0.41584	ALJ60935.1	hypothetical protein	NOT DEFINED
BcellWH2_00018	-1.36	5.74	0.093973	0.386297	ALJ57295.1	Phage gp6-like head-tail connector protein	Unknown
BcellWH2_04516	-0.48	8.58	0.0316558	0.223499	ALJ61732.1	TonB-dependent Receptor Plug Domain protein	Unknown
BcellWH2_04934	0.65	8.15	0.037245	0.243617	ALJ62143.1	hypothetical protein	EC3.2.1.51	GH95
BcellWH2_05171	1.01	6.83	0.0612621	0.310088	ALJ62379.1	FtsX-like permease family protein	NOT DEFINED
BcellWH2_04971	-0.73	8.07	0.0406102	0.252691	ALJ62180.1	Capsule biosynthesis protein CapA	NOT DEFINED
BcellWH2_03738	3.06	0.98	0.121402	0.435069	ALJ60960.1	hypothetical protein	Unknown
BcellWH2_03538	-0.73	7.24	0.0506847	0.2817	ALJ60761.1	Thiol-disulfide oxidoreductase ResA	Unknown
BcellWH2_04687	-0.65	7.78	0.042126	0.257635	ALJ61901.1	Sensor histidine kinase YehU	EC2.7.13.3
BcellWH2_02278	-0.49	8.7	0.0308692	0.222934	ALJ59518.1	SusD family protein	NOT DEFINED		BcellWH2:36	BcellWH2:40
BcellWH2_01373	2.08	3.81	0.125561	0.44116	ALJ58634.1	hypothetical protein	Unknown
BcellWH2_05456	-0.6	7.88	0.0420267	0.257635	ALJ62655.1	Dipeptide permease D	NOT DEFINED
BcellWH2_00717	-0.6	8.01	0.0390734	0.249566	ALJ57981.1	Ribonucleoside-diphosphate reductase 1 subunit alpha	EC1.17.4.1
BcellWH2_03846	-2.23	3.92	0.123097	0.437842	ALJ61068.1	hypothetical protein	Unknown
BcellWH2_00142	-2.35	3.33	0.128191	0.44497	ALJ57418.1	hypothetical protein	Unknown
BcellWH2_05166	-2.18	4.39	0.125608	0.44116	ALJ62374.1	ABC transporter ATP-binding protein YtrE	NOT DEFINED
BcellWH2_01133	3.06	0.82	0.122945	0.437627	ALJ58395.1	Yip1 domain protein	Unknown
BcellWH2_03568	-2.77	2.85	0.130819	0.448523	ALJ60791.1	Bifunctional purine biosynthesis protein PurH	EC2.1.2.3:EC3.5.4.10
BcellWH2_04770	-1.27	5.74	0.098318	0.394601	ALJ61981.1	N-acyltransferase YncA	EC2.3.1.183
BcellWH2_01681	3.23	0.99	0.122269	0.436531	ALJ58934.1	hypothetical protein	Unknown		BcellWH2:18	BcellWH2:22
BcellWH2_02243	-0.87	6.7	0.0712532	0.335243	ALJ59484.1	Amidase enhancer precursor	NOT DEFINED
BcellWH2_03787	0.81	6.96	0.0561837	0.299716	ALJ61009.1	hypothetical protein	Unknown
BcellWH2_05026	-1.73	4.95	0.118746	0.429076	ALJ62235.1	Bacterial DNA-binding protein	Unknown
BcellWH2_04914	-1.61	5.25	0.112147	0.416609	ALJ62123.1	hypothetical protein	Unknown
BcellWH2_05143	-0.95	6.46	0.0748528	0.345075	ALJ62351.1	Sensor histidine kinase YehU	Unknown
BcellWH2_03765	-0.83	7.68	0.0483838	0.275353	ALJ60987.1	hypothetical protein	Unknown
BcellWH2_00605	-3.1	0.92	0.126761	0.443244	ALJ57873.1	hypothetical protein
BcellWH2_02338	-2.73	2.67	0.132621	0.450476	ALJ59578.1	ECF RNA polymerase sigma factor SigR	NOT DEFINED		BcellWH2:40	BcellWH2:44
BcellWH2_03804	2.78	0.43	0.126736	0.443244	ALJ61026.1	hypothetical protein
BcellWH2_04369	-2.89	0.19	0.125052	0.440184	ALJ61586.1	dTDP-3-amino-3,6-dideoxy-alpha-D-galactopyranose transaminase	EC2.6.1.90
BcellWH2_02305	3.1	1.89	0.132177	0.449931	ALJ59545.1	hypothetical protein	Unknown
BcellWH2_04497	-0.45	8.96	0.0290582	0.216773	ALJ61713.1	SusD family protein	NOT DEFINED		BcellWH2:89	BcellWH2:106
BcellWH2_05030	2.75	1.69	0.133579	0.453081	ALJ62239.1	Putative oxidoreductase YdbC
BcellWH2_02277	-0.65	7.53	0.0493526	0.277226	ALJ59517.1	Exo-poly-alpha-D-galacturonosidase precursor	EC3.2.1.67	GH28	BcellWH2:36	BcellWH2:40
BcellWH2_03267	0.52	8.01	0.0400805	0.251351	ALJ60501.1	hypothetical protein	Unknown
BcellWH2_03941	-1.63	5.4	0.116614	0.425579	ALJ61161.1	hypothetical protein	Unknown
BcellWH2_03596	-0.54	8.13	0.0394073	0.250018	ALJ60819.1	hypothetical protein	Unknown		BcellWH2:75
BcellWH2_01089	-0.76	7.1	0.0575721	0.301986	ALJ58351.1	HTH-type transcriptional activator Btr	NOT DEFINED		BcellWH2:7
BcellWH2_00530	2.24	4.06	0.129729	0.446841	ALJ57798.1	putative metallo-hydrolase	EC3.1.2.6
BcellWH2_03091	3.02	1.28	0.129106	0.446516	ALJ60328.1	3-deoxy-manno-octulosonate cytidylyltransferase	NOT DEFINED
BcellWH2_00008	2.88	1.88	0.134423	0.454645	ALJ57285.1	hypothetical protein	Unknown
BcellWH2_03322	0.97	6.35	0.0792523	0.354948	ALJ60555.1	hypothetical protein	Unknown
BcellWH2_02431	0.58	7.9	0.0419143	0.257635	ALJ59670.1	hypothetical protein	Unknown
BcellWH2_04142	-2.68	0.94	0.134803	0.455606	ALJ61362.1	Hypoxanthine phosphoribosyltransferase	EC2.4.2.8
BcellWH2_01518	-2.19	3.87	0.132617	0.450476	ALJ58773.1	hypothetical protein	Unknown
BcellWH2_03676	-1.61	5.53	0.107167	0.408712	ALJ60899.1	Putative ribosome biogenesis GTPase RsgA	EC3.6.1.-:EC3.1.3.100
BcellWH2_00333	-0.97	6.61	0.0719297	0.337757	ALJ57608.1	Threonine-phosphate decarboxylase	EC4.1.1.81
BcellWH2_04242	3.01	2.3	0.137495	0.460199	ALJ61459.1	hypothetical protein
BcellWH2_04448	-1.37	5.38	0.103045	0.404019	ALJ61665.1	hypothetical protein	Unknown
BcellWH2_04608	0.81	6.96	0.0610722	0.310088	ALJ61823.1	SigmaW regulon antibacterial	Unknown
BcellWH2_01492	2.86	2.03	0.135845	0.457825	ALJ58747.1	Beta-carbonic anhydrase 1	EC4.2.1.1
BcellWH2_05425	-0.82	7	0.061877	0.311606	ALJ62624.1	hypothetical protein	Unknown
BcellWH2_02192	2.85	0.24	0.131434	0.448691	ALJ59433.1	hypothetical protein	Unknown
BcellWH2_03460	1.34	5.98	0.0906624	0.379584	ALJ60689.1	hypothetical protein	Unknown
BcellWH2_03929	-0.54	8.58	0.0340924	0.232769	ALJ61150.1	putative TonB-dependent receptor precursor	NOT DEFINED
BcellWH2_05381	2.71	-0.26	0.131403	0.448691	ALJ62581.1	N-carbamoyl-D-amino acid hydrolase	EC3.5.1.53
BcellWH2_03975	-0.72	7.52	0.0504683	0.281155	ALJ61195.1	Phage late control gene D protein (GPD)	NOT DEFINED
BcellWH2_03776	-2.71	1.21	0.141265	0.467114	ALJ60998.1	hypothetical protein	Unknown
BcellWH2_01072	-3.07	0.85	0.13541	0.456725	ALJ58334.1	Histidine biosynthesis bifunctional protein HisB	EC4.2.1.19:EC3.1.3.15
BcellWH2_03822	1.34	5.22	0.104639	0.405583	ALJ61044.1	Putative anti-sigma factor antagonist BtrV	EC2.7.11.1
BcellWH2_03284	1.69	4.86	0.123268	0.438043	ALJ60518.1	hypothetical protein	Unknown
BcellWH2_03084	1.03	6.21	0.0903207	0.378987	ALJ60321.1	FKBP-type 22 kDa peptidyl-prolyl cis-trans isomerase	EC5.2.1.8
BcellWH2_01957	0.68	7.47	0.0480688	0.274463	ALJ59203.1	hypothetical protein	Unknown
BcellWH2_05265	2.71	-0.07	0.136904	0.459441	ALJ62467.1	putative AAA-ATPase	Unknown
BcellWH2_01962	-1.23	5.69	0.109891	0.414516	ALJ59207.1	hypothetical protein	Unknown
BcellWH2_03375	-0.54	8.5	0.0371518	0.243617	ALJ60608.1	ATP-dependent DNA helicase RecQ	EC3.6.4.12
BcellWH2_03636	0.73	7.72	0.04794	0.274463	ALJ60859.1	hypothetical protein	Unknown		BcellWH2:76	BcellWH2:85
BcellWH2_01437	-0.73	7.44	0.0570703	0.300997	ALJ58698.1	Polysaccharide pyruvyl transferase	EC2.2.1.9
BcellWH2_04082	0.47	8.86	0.0311226	0.223499	ALJ61302.1	ATP-dependent RecD-like DNA helicase	EC3.6.4.12
BcellWH2_00816	-2.19	3.64	0.14358	0.469575	ALJ58079.1	hypothetical protein	Unknown
BcellWH2_00005	2.83	0.1	0.140786	0.466214	ALJ57282.1	hypothetical protein	Unknown
BcellWH2_04876	2.4	3.67	0.145203	0.472606	ALJ62085.1	Fatty acid metabolism regulator protein	NOT DEFINED
BcellWH2_03906	-0.65	7.43	0.0539657	0.294088	ALJ61127.1	lipoprotein chaperone	NOT DEFINED
BcellWH2_02142	2.89	0.77	0.14249	0.467941	ALJ59383.1	Argininosuccinate lyase	EC4.3.2.1
BcellWH2_05522	2.89	0.26	0.139816	0.46397	ALJ62720.1	hypothetical protein
BcellWH2_03368	2.43	2.68	0.14893	0.477869	ALJ60601.1	hypothetical protein	Unknown
BcellWH2_01257	-1.08	5.65	0.104371	0.405204	ALJ58519.1	Inner membrane protein YqjA	NOT DEFINED
BcellWH2_03085	-2.37	3.04	0.147539	0.476295	ALJ60322.1	FKBP-type 22 kDa peptidyl-prolyl cis-trans isomerase	EC5.2.1.8
BcellWH2_00084	-2.77	2.44	0.150606	0.478716	ALJ57360.1	ATP synthase subunit a	NOT DEFINED
BcellWH2_03910	2.27	3.72	0.145709	0.472958	ALJ61131.1	acyl carrier protein	NOT DEFINED
BcellWH2_01188	-0.52	8.29	0.0390001	0.249433	ALJ58450.1	Beta-galactosidase	EC3.2.1.23	GH2	BcellWH2:12
BcellWH2_05357	1.69	5.35	0.129725	0.446841	ALJ62559.1	NTE family protein RssA	NOT DEFINED
BcellWH2_01936	1.03	6.08	0.0878436	0.373264	ALJ59182.1	Efflux pump periplasmic linker BepF	NOT DEFINED
BcellWH2_03770	1.06	5.74	0.0996623	0.396646	ALJ60992.1	hypothetical protein	Unknown
BcellWH2_03536	-2.56	2.6	0.151134	0.479186	ALJ60759.1	hypothetical protein	Unknown
BcellWH2_00043	-0.71	7.7	0.0494992	0.277382	ALJ57320.1	hypothetical protein	Unknown
BcellWH2_03887	0.51	8.45	0.0368013	0.242998	ALJ61108.1	hypothetical protein	Unknown
BcellWH2_01587	-1.78	4.23	0.142147	0.46765	ALJ58841.1	Transcription antitermination protein RfaH	Unknown
BcellWH2_05543	1.44	5.3	0.122245	0.436531	ALJ62741.1	hypothetical protein	Unknown
BcellWH2_02146	2.31	3.43	0.149961	0.478716	ALJ59387.1	Release factor glutamine methyltransferase	EC2.1.1.297
BcellWH2_00519	2.62	2.67	0.155292	0.485173	ALJ57787.1	hypothetical protein	Unknown
BcellWH2_04938	-0.65	8	0.0434901	0.26127	ALJ62147.1	hypothetical protein	Unknown	GH138
BcellWH2_01782	0.59	7.71	0.0453206	0.268154	ALJ59035.1	3-oxoacyl-[acyl-carrier-protein] synthase 3	EC2.3.1.180
BcellWH2_05519	0.74	6.67	0.0696036	0.331419	ALJ62717.1	flavodoxin	Unknown
BcellWH2_05015	1.1	6.01	0.0881742	0.373777	ALJ62224.1	Bifunctional transcriptional activator/DNA repair enzyme AdaA	EC2.1.1.-
BcellWH2_03025	-0.78	7.28	0.0577026	0.301986	ALJ60263.1	Reducing end xylose-releasing exo-oligoxylanase	EC3.2.1.156	GH8
BcellWH2_00430	-0.87	6.68	0.0790676	0.354462	ALJ57705.1	Response regulator PleD	EC2.7.13.3
BcellWH2_03721	-1.12	6.5	0.0815757	0.359834	ALJ60943.1	hypothetical protein	Unknown
BcellWH2_03728	-0.71	7.35	0.0565461	0.300567	ALJ60950.1	Macro domain protein	Unknown
BcellWH2_02516	-1.02	6.57	0.0856164	0.370537	ALJ59755.1	N-acetylhexosamine 1-kinase	EC2.7.1.162
BcellWH2_05032	2.3	3.74	0.153539	0.481426	ALJ62241.1	hypothetical protein	Unknown
BcellWH2_04995	-0.62	7.81	0.0494017	0.277226	ALJ62204.1	NADH-dependent butanol dehydrogenase A	EC1.1.1.-
BcellWH2_03202	-2.59	1.88	0.160929	0.496075	ALJ60439.1	hypothetical protein	Unknown
BcellWH2_03934	0.55	8.2	0.0418717	0.257635	ALJ61155.1	NigD-like protein	Unknown
BcellWH2_00262	1.73	4.57	0.140308	0.465278	ALJ57538.1	Proteasome-associated ATPase	EC3.6.4.6
BcellWH2_04003	-1.86	3.76	0.153415	0.481426	ALJ61223.1	hypothetical protein	Unknown
BcellWH2_02008	-0.55	8.12	0.0441478	0.263887	ALJ59253.1	SusD family protein	NOT DEFINED		BcellWH2:27	BcellWH2:31
BcellWH2_04972	-1.09	5.84	0.105234	0.406046	ALJ62181.1	Putative glycosyltransferase EpsE	EC2.4.1.-	GT2
BcellWH2_01841	-1.37	6.01	0.0970813	0.392288	ALJ59094.1	DNA mismatch repair protein MutS	Unknown
BcellWH2_00694	-0.75	7.32	0.0607025	0.309504	ALJ57958.1	Sensory/regulatory protein RpfC	EC2.1.1.80:EC3.1.1.61
BcellWH2_02550	-0.74	7.39	0.0559591	0.299716	ALJ59789.1	hypothetical protein	Unknown
BcellWH2_00170	-2.6	2.1	0.165915	0.502294	ALJ57446.1	hypothetical protein	Unknown
BcellWH2_00707	-2.5	3.44	0.162291	0.496563	ALJ57971.1	Transcription antitermination protein RfaH	NOT DEFINED
BcellWH2_02023	-1.02	6.92	0.0834225	0.363025	ALJ59268.1	4-O-beta-D-mannosyl-D-glucose phosphorylase	EC2.4.1.281	GH130	BcellWH2:28	BcellWH2:32
BcellWH2_02949	2.87	1.76	0.167797	0.505077	ALJ60187.1	Cysteine synthase	EC2.5.1.47
BcellWH2_03615	-2.12	3.75	0.150394	0.478716	ALJ60838.1	Thiamine pyrophosphokinase	EC2.7.6.2
BcellWH2_05539	2.52	1.79	0.167828	0.505077	ALJ62737.1	Phage antirepressor protein KilAC domain protein	NOT DEFINED
BcellWH2_03598	-2.67	2.04	0.168568	0.506024	ALJ60821.1	hypothetical protein			BcellWH2:75
BcellWH2_04969	-0.78	7.11	0.0651364	0.319955	ALJ62178.1	hypothetical protein	EC6.2.1.30
BcellWH2_00155	-2.09	3.12	0.165271	0.501513	ALJ57431.1	hypothetical protein	Unknown
BcellWH2_02821	-0.39	9.37	0.0274417	0.210327	ALJ60060.1	TonB dependent receptor	Unknown		BcellWH2:52	BcellWH2:61
BcellWH2_04886	2.07	3.32	0.166077	0.502294	ALJ62095.1	Flavodoxin	NOT DEFINED
BcellWH2_04719	-0.95	6.19	0.091249	0.380408	ALJ61932.1	hypothetical protein	Unknown
BcellWH2_01564	1.64	4.96	0.141353	0.467114	ALJ58818.1	Methylmalonyl-CoA mutase large subunit	EC5.4.99.2
BcellWH2_02357	-0.55	8.29	0.0397061	0.250497	ALJ59597.1	hypothetical protein	Unknown		BcellWH2:41	BcellWH2:46
BcellWH2_01901	-0.46	8.89	0.0334803	0.231217	ALJ59152.1	hypothetical protein	EC3.2.1.45	GH116	BcellWH2:24	BcellWH2:28
BcellWH2_03223	1.72	4.49	0.150517	0.478716	ALJ60459.1	hypothetical protein	Unknown
BcellWH2_03997	-2.56	0.38	0.172446	0.509693	ALJ61217.1	hypothetical protein
BcellWH2_03782	1.54	5.2	0.135422	0.456725	ALJ61004.1	hypothetical protein	Unknown
BcellWH2_04320	-1.44	5.85	0.129101	0.446516	ALJ61537.1	Inner membrane symporter YicJ	NOT DEFINED		BcellWH2:87
BcellWH2_03465	1.08	5.76	0.0980679	0.394037	ALJ60694.1	Glucosamine-6-phosphate deaminase	EC3.5.99.6		BcellWH2:72	BcellWH2:81
BcellWH2_01934	-1.76	4.36	0.153588	0.481426	ALJ59180.1	hypothetical protein
BcellWH2_03917	-1.08	5.88	0.100052	0.397865	ALJ61138.1	3-oxoacyl-[acyl-carrier-protein] synthase 1	EC2.3.1.41
BcellWH2_01911	-0.85	6.44	0.0854993	0.370367	ALJ59162.1	Transcriptional regulatory protein UhpA	NOT DEFINED
BcellWH2_03800	-1.06	6.02	0.102117	0.402371	ALJ61022.1	TonB-dependent Receptor Plug Domain protein	NOT DEFINED		BcellWH2:81	BcellWH2:90
BcellWH2_02093	1.36	4.82	0.139368	0.463779	ALJ59336.1	hypothetical protein
BcellWH2_02019	0.58	7.78	0.0493019	0.277226	ALJ59264.1	Lysine-sensitive aspartokinase 3	EC2.7.2.4
BcellWH2_00089	-2.77	2.58	0.178549	0.517898	ALJ57365.1	hypothetical protein
BcellWH2_02746	-1.4	5.78	0.128107	0.44497	ALJ59985.1	hypothetical protein	Unknown
BcellWH2_02403	0.55	8.2	0.0422892	0.258301	ALJ59642.1	SusD family protein	NOT DEFINED		BcellWH2:42	BcellWH2:47
BcellWH2_03004	0.48	8.67	0.0364498	0.242342	ALJ60242.1	Periplasmic beta-glucosidase precursor	EC3.2.1.21	GH3	BcellWH2:58	BcellWH2:67
BcellWH2_02143	-1.59	4.8	0.149522	0.478716	ALJ59384.1	hypothetical protein	Unknown
BcellWH2_00671	-2.89	1.96	0.181755	0.519988	ALJ57938.1	6-phosphogluconolactonase	EC3.1.1.31
BcellWH2_01912	-0.51	8.64	0.0382624	0.246113	ALJ59163.1	Sensor histidine kinase LiaS	EC2.7.13.3
BcellWH2_04366	-2.98	3.62	0.180503	0.518592	ALJ61583.1	TDP-4-oxo-6-deoxy-alpha-D-glucose-3, 4-oxoisomerase	EC5.3.2.3
BcellWH2_02148	2.56	1.3	0.183713	0.523166	ALJ59389.1	hypothetical protein	Unknown
BcellWH2_05257	-0.9	6.66	0.0802982	0.357573	ALJ62459.1	hypothetical protein	Unknown
BcellWH2_00801	2.17	2.99	0.179378	0.518049	ALJ58064.1	hypothetical protein	Unknown
BcellWH2_00613	2.41	-0.27	0.184488	0.523166	ALJ57881.1	Na(+)-translocating NADH-quinone reductase subunit F	EC1.6.5.8
BcellWH2_01716	-0.49	8.54	0.0386071	0.24792	ALJ58969.1	signal peptidase I	EC3.4.21.89
BcellWH2_02652	0.71	6.84	0.0729434	0.340833	ALJ59891.1	Intracellular endo-alpha-(1->5)-L-arabinanase	EC3.2.1.99	GH43_31	BcellWH2:47	BcellWH2:54
BcellWH2_05153	-0.41	8.9	0.0348634	0.235663	ALJ62361.1	Colicin I receptor precursor	NOT DEFINED
BcellWH2_03032	-0.82	6.67	0.082108	0.360274	ALJ60270.1	HTH-type transcriptional activator Btr	Unknown			BcellWH2:68
BcellWH2_03791	2.55	-0.02	0.188489	0.529059	ALJ61013.1	hypothetical protein	Unknown
BcellWH2_01558	2.44	1.17	0.189042	0.529379	ALJ58812.1	Chorismate synthase	EC4.2.3.5
BcellWH2_03178	-1.11	6.61	0.0968759	0.391791	ALJ60415.1	putative glycerophosphoryl diester phosphodiesterase 1	EC3.1.4.46		BcellWH2:65	BcellWH2:74
BcellWH2_00552	2.56	0.04	0.189256	0.529651	ALJ57820.1	hypothetical protein
BcellWH2_03613	2.53	0.99	0.189646	0.530116	ALJ60836.1	hypothetical protein	Unknown
BcellWH2_04622	0.48	8.53	0.038274	0.246113	ALJ61836.1	Chromosome partition protein Smc	NOT DEFINED|NOT DEFINED
BcellWH2_01370	1.58	5.14	0.140995	0.466578	ALJ58631.1	hypothetical protein
BcellWH2_02420	2.52	2.89	0.186133	0.525928	ALJ59659.1	colicin V production protein	NOT DEFINED
BcellWH2_02126	2.87	1.45	0.19269	0.535288	ALJ59369.1	Helix-turn-helix domain protein	Unknown
BcellWH2_04870	-0.58	8.01	0.0462173	0.270807	ALJ62079.1	hypothetical protein	Unknown
BcellWH2_01541	-0.5	8.4	0.0412438	0.255196	ALJ58795.1	NADPH dehydrogenase	EC1.3.1.34
BcellWH2_03614	-0.9	6.6	0.0862184	0.372139	ALJ60837.1	EamA-like transporter family protein	NOT DEFINED
BcellWH2_05426	1.32	5.64	0.126933	0.443254	ALJ62625.1	UDP-glucose 6-dehydrogenase TuaD	EC1.1.1.22
BcellWH2_05103	-0.63	7.93	0.053113	0.291111	ALJ62311.1	hypothetical protein	Unknown
BcellWH2_01434	-2.56	1.58	0.192735	0.535288	ALJ58695.1	hypothetical protein
BcellWH2_02831	1.94	4.15	0.170021	0.507186	ALJ60070.1	hypothetical protein
BcellWH2_01797	-2.32	3.61	0.188292	0.528821	ALJ59050.1	hypothetical protein	Unknown
BcellWH2_02445	1.94	2.87	0.180347	0.518592	ALJ59684.1	Biosynthetic arginine decarboxylase	EC4.1.1.19
BcellWH2_01076	-1.12	5.93	0.110493	0.41584	ALJ58338.1	Thioesterase superfamily protein	Unknown
BcellWH2_02571	-1.04	6.15	0.106985	0.408608	ALJ59810.1	hypothetical protein	Unknown
BcellWH2_00584	-2.41	-0.07	0.200666	0.544272	ALJ57852.1	HTH-type transcriptional repressor YtrA	NOT DEFINED
BcellWH2_02464	-2.05	3.9	0.180302	0.518592	ALJ59703.1	hypothetical protein	EC2.4.1.-
BcellWH2_05371	0.52	8.21	0.0453696	0.268154	ALJ62571.1	Efflux pump membrane transporter BepE	NOT DEFINED
BcellWH2_02738	0.49	8.7	0.0377985	0.245716	ALJ59977.1	O-Antigen ligase	Unknown
BcellWH2_00120	2.2	0.86	0.198917	0.541693	ALJ57396.1	Conjugative transposon protein TraO	Unknown
BcellWH2_00537	1.01	6.28	0.096578	0.391791	ALJ57805.1	3-oxoacyl-[acyl-carrier-protein] reductase FabG	EC1.1.1.100
BcellWH2_04245	-1.81	4.52	0.168454	0.506001	ALJ61462.1	Glycosyl hydrolase family 57	EC3.2.1.1	GH57
BcellWH2_04187	-1.06	5.71	0.12484	0.440104	ALJ61406.1	hypothetical protein	Unknown
BcellWH2_05196	-0.92	6.75	0.0927031	0.383733	ALJ62399.1	V-type ATP synthase subunit I	NOT DEFINED
BcellWH2_02105	2.33	-0.26	0.204685	0.55158	ALJ59348.1	DNA-binding transcriptional activator PspC	NOT DEFINED
BcellWH2_02660	0.69	7.39	0.0603096	0.308766	ALJ59899.1	Inositol 2-dehydrogenase	EC1.1.1.18:EC1.1.1.369
BcellWH2_03743	-2.05	2.84	0.19122	0.532948	ALJ60965.1	hypothetical protein	Unknown
BcellWH2_04036	-2.55	0.27	0.207207	0.554731	ALJ61256.1	GSCFA family protein	Unknown
BcellWH2_01037	-2.57	1.36	0.20384	0.550368	ALJ58299.1	1-acyl-sn-glycerol-3-phosphate acyltransferase	EC2.3.1.51
BcellWH2_03020	0.51	8.09	0.0466641	0.271085	ALJ60258.1	Alpha-L-fucosidase	EC3.2.1.51	GH29
BcellWH2_02588	-1.54	5.19	0.148299	0.47745	ALJ59827.1	Tyrosine-protein phosphatase precursor	EC3.1.3.48
BcellWH2_00354	0.94	6.31	0.0948978	0.388419	ALJ57629.1	MotA/TolQ/ExbB proton channel family protein	Unknown
BcellWH2_00866	0.54	8.01	0.0493606	0.277226	ALJ58128.1	hypothetical protein	Unknown
BcellWH2_02507	1.42	5.17	0.150526	0.478716	ALJ59746.1	Acyl-coenzyme A thioesterase PaaI	EC3.1.2.-
BcellWH2_00206	-2.3	3.26	0.19549	0.537284	ALJ57482.1	Polysaccharide biosynthesis/export protein	NOT DEFINED
BcellWH2_01452	1.52	4.36	0.161233	0.496184	ALJ58713.1	phosphodiesterase	NOT DEFINED
BcellWH2_03527	-0.56	8.38	0.0434253	0.261211	ALJ60750.1	hypothetical protein	Unknown
BcellWH2_04913	0.81	7.21	0.0753494	0.346287	ALJ62122.1	Relaxase/mobilization nuclease domain protein	Unknown
BcellWH2_00129	0.84	6.84	0.0765045	0.348908	ALJ57405.1	Group II intron-encoded protein LtrA	EC2.7.7.49
BcellWH2_02901	1.4	4.82	0.146687	0.474834	ALJ60140.1	hypothetical protein	Unknown
BcellWH2_02942	-2.57	2.32	0.204487	0.55158	ALJ60180.1	Inner membrane protein YqaA	Unknown
BcellWH2_03327	0.52	8.19	0.0443072	0.264508	ALJ60560.1	Cobalt-zinc-cadmium resistance protein CzcA	NOT DEFINED
BcellWH2_05513	1.63	4.95	0.162098	0.496563	ALJ62711.1	hypothetical protein	Unknown
BcellWH2_05315	-2.04	4.14	0.185736	0.525369	ALJ62517.1	hypothetical protein	Unknown
BcellWH2_01780	2.5	1.47	0.21557	0.565083	ALJ59033.1	hypothetical protein
BcellWH2_02895	-1.86	4.33	0.181417	0.519335	ALJ60134.1	hypothetical protein	Unknown
BcellWH2_05515	1.35	4.67	0.160974	0.496075	ALJ62713.1	Putative NAD(P)H nitroreductase MhqN	EC1.-.-.-
BcellWH2_00769	1.42	3.97	0.170467	0.507556	ALJ58032.1	hypothetical protein	Unknown
BcellWH2_03506	-2.44	0.37	0.220871	0.571355	ALJ60729.1	HTH-type transcriptional repressor KstR2	NOT DEFINED
BcellWH2_00987	-0.64	7.29	0.0675385	0.326297	ALJ58249.1	hypothetical protein	Unknown
BcellWH2_04353	-0.68	7.81	0.0568441	0.300805	ALJ61570.1	hypothetical protein	Unknown		BcellWH2:88	BcellWH2:105
BcellWH2_02497	-1.85	4.55	0.170265	0.507274	ALJ59736.1	Protein of unknown function (Porph_ging)	Unknown
BcellWH2_04363	-2.72	1.88	0.218682	0.568754	ALJ61580.1	hypothetical protein	Unknown
BcellWH2_00291	-1.92	3.84	0.198296	0.540621	ALJ57567.1	hypothetical protein	Unknown
BcellWH2_00076	-0.67	7.53	0.0614724	0.310485	ALJ57352.1	hypothetical protein	Unknown
BcellWH2_05273	-2.45	0.73	0.224097	0.576351	ALJ62475.1	Amidophosphoribosyltransferase	EC2.4.2.14
BcellWH2_03508	-2.44	1.45	0.217759	0.567321	ALJ60731.1	tRNA pseudouridine synthase C	EC5.4.99.23
BcellWH2_00065	-1.06	5.93	0.114653	0.421427	ALJ57341.1	Lipoprotein-releasing system ATP-binding protein LolD	NOT DEFINED
BcellWH2_00819	-1.02	6.01	0.121989	0.436513	ALJ58082.1	hypothetical protein	Unknown
BcellWH2_05472	1.4	5.45	0.155916	0.485846	ALJ62670.1	Nucleotidyltransferase domain protein	NOT DEFINED
BcellWH2_00214	-2.42	0.73	0.226253	0.578041	ALJ57490.1	hypothetical protein	Unknown
BcellWH2_00346	0.72	7.38	0.0649681	0.319955	ALJ57621.1	Sirohydrochlorin cobaltochelatase CbiKP precursor	EC4.99.1.3
BcellWH2_03640	-0.45	8.74	0.0381987	0.246113	ALJ60863.1	hypothetical protein	EC3.1.1.53
BcellWH2_04161	-1.5	4.89	0.160015	0.494639	ALJ61381.1	EamA-like transporter family protein	NOT DEFINED
BcellWH2_01832	-0.52	8.24	0.0461555	0.270779	ALJ59085.1	Endo-1,4-beta-xylanase/feruloyl esterase precursor	EC3.2.1.37|EC3.2.1.55	GH10-CE1
BcellWH2_04027	1.01	5.73	0.118183	0.428052	ALJ61247.1	NADH-quinone oxidoreductase subunit 6	EC1.6.5.3
BcellWH2_04322	-0.52	8.18	0.0488362	0.277226	ALJ61539.1	Beta-galactosidase precursor	EC3.2.1.23	GH35	BcellWH2:87
BcellWH2_05343	2.38	0.63	0.230662	0.583346	ALJ62545.1	ATPase RavA	EC3.6.3.-
BcellWH2_02631	-2.15	-0.3	0.234013	0.587457	ALJ59870.1	DNA alkylation repair enzyme	Unknown
BcellWH2_01134	-2.38	2	0.225678	0.577766	ALJ58396.1	NigD-like protein	Unknown
BcellWH2_02565	1	6.25	0.0989996	0.396006	ALJ59804.1	hypothetical protein	Unknown
BcellWH2_03886	2.2	-0.24	0.235914	0.58837	ALJ61107.1	hypothetical protein	Unknown
BcellWH2_02232	-1.89	3.71	0.191502	0.533027	ALJ59473.1	hypothetical protein
BcellWH2_00024	-2.27	0.99	0.230847	0.583502	ALJ57301.1	GIY-YIG catalytic domain protein	Unknown
BcellWH2_01766	1.64	4.43	0.172192	0.509693	ALJ59019.1	Chaperone protein YajL	EC3.5.1.124
BcellWH2_04920	0.64	7.58	0.0610869	0.310088	ALJ62129.1	putative type I restriction enzymeP M protein	EC2.1.1.72
BcellWH2_03559	-0.74	6.69	0.0859496	0.37164	ALJ60782.1	hypothetical protein	Unknown
BcellWH2_02099	-0.41	9.22	0.0319183	0.224705	ALJ59342.1	Arabinoxylan arabinofuranohydrolase precursor	EC3.2.1.55	GH43_29-CBM6
BcellWH2_04438	0.66	7.51	0.0650075	0.319955	ALJ61655.1	Ribonuclease Z	EC3.1.26.11
BcellWH2_04368	-2.68	2.08	0.231506	0.584241	ALJ61585.1	dTDP-3-amino-3,6-dideoxy-alpha-D-galactopyranose 3-N-acetyltransferase	EC2.3.1.197
BcellWH2_00105	1.43	4.67	0.176849	0.516208	ALJ57381.1	Helix-turn-helix domain protein	Unknown
BcellWH2_01201	-1.2	5.18	0.138731	0.462612	ALJ58463.1	D-lyxose ketol-isomerase	Unknown
BcellWH2_00098	2.44	1.96	0.228992	0.581288	ALJ57374.1	hypothetical protein	Unknown
BcellWH2_01783	-0.73	7.38	0.0658998	0.321515	ALJ59036.1	Long-chain-fatty-acid--CoA ligase	EC6.2.1.3
BcellWH2_03236	-0.8	7.08	0.0739843	0.343908	ALJ60470.1	SusD family protein	NOT DEFINED		BcellWH2:66	BcellWH2:75
BcellWH2_02152	1.91	4.31	0.19321	0.535356	ALJ59393.1	periplasmic chaperone	NOT DEFINED
BcellWH2_01823	1.07	5.84	0.132049	0.449817	ALJ59076.1	hypothetical protein
BcellWH2_02168	2.17	3.53	0.216357	0.56568	ALJ59409.1	hypothetical protein	Unknown
BcellWH2_03754	-2.32	0.47	0.24431	0.589651	ALJ60976.1	hypothetical protein	Unknown
BcellWH2_01989	2.32	3.22	0.220361	0.57091	ALJ59234.1	hypothetical protein
BcellWH2_01642	-0.44	9.1	0.0338434	0.231734	ALJ58895.1	Sensor histidine kinase TodS	Unknown		BcellWH2:16
BcellWH2_02897	-1.7	3.53	0.201536	0.546009	ALJ60136.1	hypothetical protein	Unknown
BcellWH2_01154	2.12	0.14	0.245675	0.591712	ALJ58416.1	tRNA-specific 2-thiouridylase MnmA	EC2.8.1.13
BcellWH2_05294	1.13	5.49	0.141602	0.467613	ALJ62496.1	Acid shock protein	NOT DEFINED
BcellWH2_00844	1.97	-0.33	0.253549	0.5996	ALJ58107.1	hypothetical protein	Unknown
BcellWH2_00881	-2.52	1.45	0.244323	0.589651	ALJ58143.1	hypothetical protein	Unknown
BcellWH2_03876	-1.09	6.41	0.112291	0.416609	ALJ61098.1	hypothetical protein	Unknown
BcellWH2_00159	-0.93	6.48	0.0995846	0.396646	ALJ57435.1	hypothetical protein	Unknown
BcellWH2_01340	-0.88	7.05	0.0745453	0.345075	ALJ58601.1	SusD family protein	NOT DEFINED		BcellWH2:14	BcellWH2:15
BcellWH2_02160	-0.59	8.15	0.0496299	0.277787	ALJ59401.1	Glycosyl hydrolase family 92	Unknown	GH92	BcellWH2:31	BcellWH2:35
BcellWH2_05277	-1.38	4.4	0.184156	0.523166	ALJ62479.1	Trehalose operon transcriptional repressor	NOT DEFINED
BcellWH2_00607	-1.54	5.03	0.179238	0.518049	ALJ57875.1	ECF RNA polymerase sigma factor SigW	NOT DEFINED
BcellWH2_05545	2.32	2.44	0.237069	0.589456	ALJ62743.1	hypothetical protein
BcellWH2_03872	0.74	7.07	0.0774679	0.351593	ALJ61094.1	Pyruvate formate-lyase 1-activating enzyme	EC1.97.1.4
BcellWH2_03992	2.32	1	0.251386	0.597855	ALJ61212.1	hypothetical protein	Unknown
BcellWH2_01565	2.25	2.46	0.234147	0.587457	ALJ58819.1	Methylmalonyl-CoA mutase small subunit	EC5.4.99.2
BcellWH2_00361	2.25	2.83	0.218229	0.56792	ALJ57636.1	cobalt-precorrin-6A synthase	EC2.1.1.195
BcellWH2_03799	-2.06	1.91	0.23745	0.589456	ALJ61021.1	hypothetical protein
BcellWH2_01516	-0.85	7.12	0.0797112	0.355336	ALJ58771.1	Ribosomal RNA small subunit methyltransferase F	EC2.1.1.178
BcellWH2_02606	-2.02	-0.14	0.259096	0.60562	ALJ59845.1	integration host factor subunit alpha	Unknown
BcellWH2_02684	-0.59	7.87	0.0559798	0.299716	ALJ59923.1	hypothetical protein	Unknown
BcellWH2_04587	-1.74	4.43	0.194396	0.536452	ALJ61802.1	hypothetical protein	Unknown
BcellWH2_05285	-0.56	7.89	0.0564516	0.300401	ALJ62487.1	Outer membrane efflux protein	Unknown
BcellWH2_01478	1.93	3.81	0.215661	0.565083	ALJ58734.1	DNA-binding protein HU	Unknown
BcellWH2_02179	0.84	6.78	0.0828929	0.361866	ALJ59420.1	Ribosomal large subunit pseudouridine synthase D	EC5.4.99.23
BcellWH2_00971	1.32	4.97	0.164297	0.500475	ALJ58233.1	Ribosomal protein L11 methyltransferase	EC2.1.1.-
BcellWH2_05031	1.87	4.19	0.20617	0.552831	ALJ62240.1	AraC-like ligand binding domain protein	Unknown
BcellWH2_03877	-1.78	3.79	0.225762	0.577766	ALJ61099.1	hypothetical protein
BcellWH2_03609	-2.5	2.55	0.247883	0.592961	ALJ60832.1	cofactor-independent phosphoglycerate mutase	EC5.4.2.12
BcellWH2_02690	-0.68	7.24	0.0725562	0.339692	ALJ59929.1	hypothetical protein	Unknown
BcellWH2_04395	2.22	2.24	0.251498	0.597855	ALJ61612.1	hypothetical protein	Unknown
BcellWH2_02413	-0.85	6.28	0.109628	0.414439	ALJ59652.1	hypothetical protein	Unknown
BcellWH2_01964	-1.41	4.66	0.177554	0.51706	ALJ59209.1	hypothetical protein	Unknown
BcellWH2_01411	-0.94	6.34	0.115649	0.42372	ALJ58672.1	Trehalose utilization	NOT DEFINED
BcellWH2_04167	0.66	7.17	0.0746473	0.345075	ALJ61387.1	Transcriptional regulatory protein YehT	NOT DEFINED
BcellWH2_04393	-0.71	6.96	0.0831015	0.362292	ALJ61610.1	hypothetical protein	NOT DEFINED
BcellWH2_01109	-0.52	8.42	0.0457882	0.269289	ALJ58371.1	hypothetical protein	NOT DEFINED		BcellWH2:8
BcellWH2_02400	-1.36	5.42	0.152254	0.480195	ALJ59639.1	Ribonuclease HII	EC3.1.26.4
BcellWH2_02170	1.09	5.86	0.132027	0.449817	ALJ59411.1	hypothetical protein
BcellWH2_00298	2.13	2.76	0.235206	0.588262	ALJ57574.1	hypothetical protein	Unknown
BcellWH2_05128	-1.78	3.92	0.210784	0.561146	ALJ62336.1	Nitronate monooxygenase	EC1.3.1.9
BcellWH2_03775	1.12	5.86	0.124667	0.440104	ALJ60997.1	SMI1 / KNR4 family protein	NOT DEFINED
BcellWH2_04136	1	6.38	0.103265	0.404547	ALJ61356.1	lipoprotein signal peptidase	EC3.4.23.36
BcellWH2_01424	1.4	5.34	0.169326	0.506707	ALJ58685.1	hypothetical protein	Unknown
BcellWH2_01979	-2.19	0.55	0.27559	0.620077	ALJ59224.1	hypothetical protein
BcellWH2_01335	1.91	3.71	0.218082	0.56785	ALJ58596.1	putative sugar kinase YdjH	EC2.7.1.4			BcellWH2:15
BcellWH2_01018	1.95	3.66	0.232968	0.585814	ALJ58280.1	hypothetical protein	Unknown
BcellWH2_01054	-2.13	2.47	0.251586	0.597855	ALJ58316.1	holo-(acyl carrier protein) synthase 2	EC2.7.8.-
BcellWH2_00581	2.2	0.55	0.288463	0.633446	ALJ57849.1	hypothetical protein	Unknown
BcellWH2_02116	0.67	7.23	0.072311	0.338877	ALJ59359.1	Alpha-L-fucosidase	EC3.2.1.51	GH29	BcellWH2:30	BcellWH2:34
BcellWH2_01418	0.54	8.27	0.0527209	0.289651	ALJ58679.1	Tyrosine-protein kinase ptk	EC2.7.10.-
BcellWH2_05258	-2.43	2.06	0.263836	0.608026	ALJ62460.1	LL-diaminopimelate aminotransferase	EC2.6.1.83
BcellWH2_01830	0.56	7.82	0.0591587	0.306818	ALJ59083.1	Alkaline phosphatase 3 precursor	EC3.1.3.1
BcellWH2_04690	1.57	4.32	0.206404	0.552892	ALJ61904.1	hypothetical protein	Unknown
BcellWH2_03918	-2.21	2.97	0.262325	0.607194	ALJ61139.1	3-oxoacyl-[acyl-carrier-protein] reductase FabG	EC1.1.1.100
BcellWH2_01417	-0.5	8.04	0.0556968	0.299716	ALJ58678.1	Polysaccharide biosynthesis/export protein	NOT DEFINED
BcellWH2_05312	0.76	6.94	0.082568	0.36096	ALJ62514.1	Cycloisomaltooligosaccharide glucanotransferase precursor	EC3.2.1.11	GH66	BcellWH2:94	BcellWH2:112
BcellWH2_02183	2.05	2.04	0.268711	0.613606	ALJ59424.1	Thiosulfate sulfurtransferase GlpE	NOT DEFINED
BcellWH2_05125	1.63	4.22	0.205095	0.55158	ALJ62333.1	hypothetical protein	NOT DEFINED
BcellWH2_00988	-0.61	8.24	0.0534199	0.292259	ALJ58250.1	hypothetical protein	EC3.6.4.12
BcellWH2_04246	2.26	0.71	0.286117	0.631212	ALJ61463.1	hypothetical protein	Unknown
BcellWH2_03968	-0.75	7	0.0815417	0.359834	ALJ61188.1	hypothetical protein	Unknown
BcellWH2_00244	-2.24	2.83	0.246411	0.591849	ALJ57520.1	hypothetical protein	Unknown
BcellWH2_01222	0.44	9.35	0.032906	0.228277	ALJ58484.1	Multidrug resistance protein MexB	NOT DEFINED
BcellWH2_05436	0.5	8.81	0.0405918	0.252691	ALJ62635.1	Polysaccharide biosynthesis protein	Unknown
BcellWH2_05495	-1.28	5.23	0.169194	0.506707	ALJ62693.1	DNA-3-methyladenine glycosylase 1	EC3.2.2.20
BcellWH2_04437	-1.68	3.35	0.22346	0.575858	ALJ61654.1	hypothetical protein	Unknown
BcellWH2_00179	-1.8	3.47	0.240856	0.589456	ALJ57455.1	cyclopropane fatty acyl phospholipid synthase	EC2.1.1.79
BcellWH2_03325	1.39	5.49	0.161668	0.496355	ALJ60558.1	Cobalt-zinc-cadmium resistance protein CzcC precursor	NOT DEFINED
BcellWH2_05203	-2.03	0.5	0.309304	0.653313	ALJ62406.1	Inner membrane protein YjjP	Unknown
BcellWH2_05455	-0.85	6.54	0.0993944	0.396244	ALJ62654.1	hypothetical protein	Unknown
BcellWH2_03756	-1.89	2.6	0.267585	0.612708	ALJ60978.1	hypothetical protein	Unknown
BcellWH2_04791	2.11	1.03	0.300617	0.646394	ALJ62001.1	hypothetical protein	NOT DEFINED
BcellWH2_01386	-1.15	5.54	0.155521	0.485411	ALJ58647.1	hypothetical protein	Unknown
BcellWH2_00028	-1.33	4.99	0.184145	0.523166	ALJ57305.1	hypothetical protein	Unknown
BcellWH2_04282	0.49	8.37	0.047908	0.274463	ALJ61499.1	Glycosyl hydrolase family 92	Unknown	GH92
BcellWH2_01312	0.83	6.4	0.116873	0.425579	ALJ58573.1	hypothetical protein	Unknown
BcellWH2_00814	1.96	2.95	0.270724	0.614658	ALJ58077.1	hypothetical protein	Unknown
BcellWH2_03272	2.03	2.29	0.281606	0.62642	ALJ60506.1	hypothetical protein
BcellWH2_02916	-1.54	4.74	0.201432	0.546009	ALJ60155.1	hypothetical protein	Unknown
BcellWH2_03136	-1.77	-0.31	0.329694	0.671598	ALJ60373.1	3-dehydroquinate dehydratase	EC4.2.1.10
BcellWH2_01707	1.42	3.87	0.217399	0.567321	ALJ58960.1	Glucokinase	EC2.7.1.2		BcellWH2:19	BcellWH2:23
BcellWH2_04677	0.65	7.37	0.0740356	0.343908	ALJ61891.1	H(+)/Cl(-) exchange transporter ClcA	NOT DEFINED
BcellWH2_01451	1.51	4.59	0.220556	0.57091	ALJ58712.1	Glucose-1-phosphate thymidylyltransferase 2	EC2.7.7.24
BcellWH2_00678	0.62	7.71	0.0651097	0.319955	ALJ57945.1	Arylsulfatase precursor	EC3.2.1.23
BcellWH2_00362	-2.02	0.94	0.313525	0.656537	ALJ57637.1	3-oxoacyl-[acyl-carrier-protein] reductase FabG	EC2.5.1.19
BcellWH2_01180	0.57	7.69	0.0625562	0.313	ALJ58442.1	Fasciclin domain protein	Unknown		BcellWH2:12	BcellWH2:13
BcellWH2_00456	0.77	7.02	0.095802	0.390438	ALJ57730.1	hypothetical protein	Unknown
BcellWH2_03826	-0.43	8.95	0.0397321	0.250497	ALJ61048.1	Efflux pump membrane transporter BepE	NOT DEFINED
BcellWH2_05512	-1.04	5.31	0.161323	0.496184	ALJ62710.1	hypothetical protein	Unknown
BcellWH2_03956	-0.85	6.31	0.11786	0.427833	ALJ61176.1	UDP-D-galactose(glucosyl)lipopolysaccharide-1, 6-D-galactosyltransferase	EC2.4.1.11	GT4
BcellWH2_04782	-1.54	5.36	0.184554	0.523166	ALJ61993.1	Maltose O-acetyltransferase	EC2.3.1.79
BcellWH2_00604	1.91	1.59	0.2851	0.629845	ALJ57872.1	hypothetical protein	Unknown
BcellWH2_00267	1.94	3.53	0.260472	0.606746	ALJ57543.1	hypothetical protein	Unknown
BcellWH2_02526	-0.66	7.32	0.0782083	0.351865	ALJ59765.1	tRNA-dihydrouridine synthase C	EC1.-.-.-		BcellWH2:44
BcellWH2_02513	0.93	6.18	0.117705	0.427624	ALJ59752.1	Acyl-[acyl-carrier-protein]--UDP-N- acetylglucosamine O-acyltransferase	EC2.3.1.129
BcellWH2_00861	-1.9	2.85	0.272677	0.617632	ALJ58123.1	hypothetical protein	Unknown
BcellWH2_02106	-1.86	0.57	0.326619	0.668936	ALJ59349.1	N-acetyl-gamma-glutamyl-phosphate reductase	EC1.2.1.38
BcellWH2_04668	1.92	2.39	0.295289	0.64033	ALJ61882.1	fec operon regulator FecR	NOT DEFINED
BcellWH2_04152	-0.8	6.43	0.10782	0.410876	ALJ61372.1	transcriptional activator FtrA	EC2.7.1.49:EC2.7.4.7
BcellWH2_02756	-0.84	6.57	0.103771	0.404631	ALJ59995.1	Extracellular exo-alpha-(1->5)-L-arabinofuranosidase ArbA precursor	EC3.2.1.99	GH43_3	BcellWH2:51	BcellWH2:60
BcellWH2_00893	-1.28	4.77	0.178059	0.517515	ALJ58155.1	hypothetical protein	Unknown
BcellWH2_04994	0.63	7.61	0.0702721	0.332602	ALJ62203.1	Iron hydrogenase 1	EC1.12.7.2
BcellWH2_00087	-1.92	2.72	0.287795	0.633149	ALJ57363.1	ATP synthase subunit beta	EC3.6.3.14
BcellWH2_01702	-1.01	6.12	0.125947	0.441696	ALJ58955.1	SusD family protein	NOT DEFINED		BcellWH2:19	BcellWH2:23
BcellWH2_00782	1.41	5.83	0.189048	0.529379	ALJ58045.1	hypothetical protein
BcellWH2_03839	-0.68	7.02	0.08775	0.373264	ALJ61061.1	hypothetical protein	Unknown
BcellWH2_00575	0.67	7.43	0.0708003	0.334313	ALJ57843.1	hypothetical protein	Unknown
BcellWH2_05217	1.81	0.51	0.352218	0.690202	ALJ62420.1	Nucleotidyltransferase domain protein	EC3.1.21.3
BcellWH2_04591	-1.7	3.8	0.24362	0.589456	ALJ61806.1	hypothetical protein	Unknown
BcellWH2_05007	1.3	4.73	0.21546	0.565083	ALJ62216.1	hypothetical protein	Unknown
BcellWH2_05175	-1.47	4.01	0.240613	0.589456	ALJ62383.1	hypothetical protein	Unknown
BcellWH2_05071	-0.83	6.98	0.0984651	0.394857	ALJ62279.1	Putative TrmH family tRNA/rRNA methyltransferase	EC2.1.1.185
BcellWH2_03766	1.27	4.89	0.179864	0.518324	ALJ60988.1	hypothetical protein	Unknown
BcellWH2_04088	-0.52	8.85	0.0418789	0.257635	ALJ61308.1	hypothetical protein	Unknown		BcellWH2:84
BcellWH2_03771	1.91	3.05	0.261712	0.606958	ALJ60993.1	hypothetical protein	Unknown
BcellWH2_02860	-2.07	2.14	0.322129	0.663526	ALJ60099.1	hypothetical protein	Unknown
BcellWH2_04527	1	6.1	0.134126	0.454289	ALJ61743.1	hypothetical protein	Unknown
BcellWH2_00138	-1.45	4.34	0.228424	0.580465	ALJ57414.1	Relaxase/mobilization nuclease domain protein	Unknown
BcellWH2_02770	-1.98	1.29	0.34153	0.682131	ALJ60009.1	hypothetical protein	Unknown
BcellWH2_03833	0.75	7.12	0.0820771	0.360274	ALJ61055.1	Beta-1,6-galactofuranosyltransferase WbbI	Unknown
BcellWH2_04605	-1.6	-0.16	0.374829	0.708801	ALJ61820.1	tRNA modification GTPase MnmE	EC3.6.-.-
BcellWH2_04776	-0.72	6.8	0.0965812	0.391791	ALJ61987.1	Ferric uptake regulator family protein	NOT DEFINED
BcellWH2_03546	-1.59	-0.06	0.383757	0.713305	ALJ60769.1	Transcriptional regulatory protein ZraR	NOT DEFINED
BcellWH2_04956	1.86	1.27	0.350045	0.688307	ALJ62165.1	Bacterial DNA-binding protein	Unknown
BcellWH2_00676	1.67	-0.04	0.369665	0.704112	ALJ57943.1	GDP-L-fucose synthase	EC1.1.1.271
BcellWH2_01021	0.9	6.33	0.116124	0.424804	ALJ58283.1	hypothetical protein	Unknown
BcellWH2_03355	1.64	4.68	0.219447	0.569321	ALJ60588.1	hypothetical protein	Unknown
BcellWH2_05267	1.7	3.22	0.275324	0.620077	ALJ62469.1	hypothetical protein	Unknown
BcellWH2_00750	1.66	3.16	0.292957	0.638299	ALJ58014.1	N-acetylglucosamine repressor	NOT DEFINED			BcellWH2:3
BcellWH2_00364	-1.57	0.21	0.386141	0.714115	ALJ57639.1	hypothetical protein
BcellWH2_01781	-1.9	3.09	0.290991	0.635474	ALJ59034.1	2,5-dichloro-2,5-cyclohexadiene-1,4-diol dehydrogenase	EC1.1.1.100
BcellWH2_00147	1.62	0.1	0.386755	0.714292	ALJ57423.1	hypothetical protein	Unknown
BcellWH2_05300	0.51	7.95	0.0609786	0.310088	ALJ62502.1	hypothetical protein	NOT DEFINED
BcellWH2_02480	1.81	0.5	0.394206	0.714859	ALJ59719.1	GH3 auxin-responsive promoter	Unknown
BcellWH2_02249	-1.75	1.01	0.375626	0.709235	ALJ59490.1	N-acetylmuramic acid 6-phosphate etherase	EC4.2.1.126
BcellWH2_00938	1.57	0.27	0.382108	0.713305	ALJ58200.1	Ribose-5-phosphate isomerase B	EC5.3.1.6
BcellWH2_04277	0.78	6.52	0.116479	0.425579	ALJ61494.1	putative AAA-ATPase
BcellWH2_02076	-0.42	8.83	0.0443893	0.264665	ALJ59319.1	hypothetical protein	EC4.2.2.2	PL1_2	BcellWH2:29	BcellWH2:33
BcellWH2_01304	-0.42	8.91	0.0424408	0.258588	ALJ58565.1	Multidrug resistance protein MexB	NOT DEFINED
BcellWH2_01551	-1.37	4.68	0.197759	0.540434	ALJ58805.1	Dihydroxy-acid dehydratase	EC4.2.1.9
BcellWH2_02524	-0.52	8.18	0.0562598	0.299716	ALJ59763.1	Chondroitinase-AC precursor	EC4.2.2.5	PL	BcellWH2:44
BcellWH2_02494	1.55	-0.2	0.407312	0.723172	ALJ59733.1	hypothetical protein	Unknown
BcellWH2_00001	-1.7	3.8	0.258235	0.60412	ALJ57278.1	hypothetical protein
BcellWH2_03749	-1.21	4.84	0.213948	0.564711	ALJ60971.1	hypothetical protein	Unknown
BcellWH2_00223	1.8	3.22	0.281355	0.62642	ALJ57499.1	hypothetical protein	Unknown
BcellWH2_03294	-0.55	8.56	0.0491292	0.277226	ALJ60528.1	SusD family protein	NOT DEFINED		BcellWH2:68	BcellWH2:77
BcellWH2_00719	0.57	8.39	0.0576433	0.301986	ALJ57983.1	CAAX amino terminal protease self- immunity	NOT DEFINED
BcellWH2_01785	-1.41	5.02	0.199868	0.54297	ALJ59038.1	hypothetical protein	NOT DEFINED
BcellWH2_01400	1.64	0.04	0.39872	0.717108	ALJ58661.1	Murein hydrolase activator NlpD precursor	NOT DEFINED
BcellWH2_00845	1.84	1.16	0.367824	0.702249	ALJ58108.1	hypothetical protein	Unknown
BcellWH2_04425	1.23	5.28	0.170889	0.508062	ALJ61642.1	Glutaconyl-CoA decarboxylase subunit beta	EC4.1.1.3
BcellWH2_02068	1.69	0.58	0.384446	0.713305	ALJ59311.1	hypothetical protein	Unknown
BcellWH2_05533	1.57	4.12	0.237228	0.589456	ALJ62731.1	Toxin-antitoxin biofilm protein TabA	NOT DEFINED
BcellWH2_00010	1.81	4.13	0.263339	0.607655	ALJ57287.1	HNH endonuclease	EC3.1.21.-
BcellWH2_02564	-1.36	4.81	0.212129	0.562735	ALJ59803.1	hypothetical protein	Unknown
BcellWH2_02506	1.59	1.82	0.348337	0.688307	ALJ59745.1	Unsaturated chondroitin disaccharide hydrolase	EC4.2.2.5	GH88
BcellWH2_03208	1.58	0	0.398997	0.717108	ALJ60444.1	intramembrane serine protease GlpG	EC3.4.21.105
BcellWH2_01547	1.66	3.89	0.268189	0.612708	ALJ58801.1	Ketol-acid reductoisomerase	EC1.1.1.86
BcellWH2_03098	-0.55	7.92	0.0651759	0.319955	ALJ60335.1	Divergent AAA domain protein	EC3.6.4.12
BcellWH2_00261	-1.76	3.71	0.266635	0.611805	ALJ57537.1	hypothetical protein	Unknown
BcellWH2_04645	-1.83	1.49	0.359747	0.696341	ALJ61859.1	ECF RNA polymerase sigma factor SigJ	NOT DEFINED
BcellWH2_02547	-1.65	4.3	0.269267	0.61424	ALJ59786.1	hypothetical protein	Unknown
BcellWH2_03881	-1.63	3.46	0.27843	0.622927	ALJ61102.1	hypothetical protein
BcellWH2_04810	-1.71	3.21	0.295371	0.64033	ALJ62019.1	Beta-lactamase superfamily domain protein	Unknown
BcellWH2_05326	0.62	7.69	0.0709852	0.334313	ALJ62528.1	C4-dicarboxylate transport sensor protein DctB	EC2.7.13.3
BcellWH2_05292	-1.63	3.88	0.25821	0.60412	ALJ62494.1	hypothetical protein	Unknown
BcellWH2_00590	-0.92	6.34	0.122674	0.43732	ALJ57858.1	IMPACT family member YigZ	Unknown
BcellWH2_04798	-1.9	1.67	0.343173	0.682896	ALJ62008.1	Ferrous iron transport protein B	NOT DEFINED
BcellWH2_03531	-1.6	0.37	0.411416	0.727595	ALJ60754.1	hypothetical protein	Unknown
BcellWH2_04957	1.62	0.59	0.379257	0.712071	ALJ62166.1	hypothetical protein	Unknown
BcellWH2_01259	1.42	-0.24	0.440117	0.742961	ALJ58521.1	hypothetical protein	Unknown
BcellWH2_01301	0.64	7.52	0.0734863	0.34236	ALJ58562.1	Major Facilitator Superfamily protein	NOT DEFINED
BcellWH2_03955	-0.51	8.37	0.0552704	0.29846	ALJ61175.1	hypothetical protein	EC2.4.1.-
BcellWH2_00799	-1.61	3.85	0.25948	0.605834	ALJ58062.1	hypothetical protein	Unknown
BcellWH2_04236	-1.75	1.44	0.355147	0.692642	ALJ61453.1	hypothetical protein	NOT DEFINED
BcellWH2_03197	0.98	5.56	0.178954	0.517898	ALJ60434.1	hypothetical protein	Unknown
BcellWH2_01260	-0.4	8.78	0.0468459	0.271809	ALJ58522.1	hypothetical protein	Unknown
BcellWH2_03352	-1.58	1.97	0.353299	0.691619	ALJ60585.1	hypothetical protein	Unknown
BcellWH2_05058	-0.39	8.97	0.0446567	0.265593	ALJ62266.1	Sensor histidine kinase RcsC	EC2.7.13.1
BcellWH2_05490	0.89	6.7	0.108536	0.412611	ALJ62688.1	hypothetical protein	Unknown
BcellWH2_00321	0.74	6.75	0.102734	0.403132	ALJ57597.1	Calcineurin-like phosphoesterase	EC3.1.4.53
BcellWH2_01703	-0.87	6.57	0.121278	0.435069	ALJ58956.1	Unsaturated chondroitin disaccharide hydrolase	EC3.2.1.180	GH88	BcellWH2:19	BcellWH2:23
BcellWH2_02764	-0.57	8.22	0.0571475	0.30107	ALJ60003.1	hypothetical protein	Unknown
BcellWH2_03702	1.78	1.57	0.355838	0.693008	ALJ60925.1	Helix-turn-helix domain protein	Unknown
BcellWH2_02404	1.41	0.14	0.450564	0.753371	ALJ59643.1	hypothetical protein	Unknown		BcellWH2:42	BcellWH2:47
BcellWH2_03283	-1.78	3.79	0.309508	0.653385	ALJ60517.1	hypothetical protein	Unknown
BcellWH2_01064	1.56	1.13	0.410526	0.726833	ALJ58326.1	Phosphatidylglycerophosphatase A	EC3.1.3.27
BcellWH2_04603	-1.47	4.12	0.257977	0.60412	ALJ61818.1	Putative TrmH family tRNA/rRNA methyltransferase	Unknown
BcellWH2_05375	-1.56	0.44	0.42967	0.738503	ALJ62575.1	Putative GTP cyclohydrolase 1 type 2	Unknown
BcellWH2_03862	-1.61	0.68	0.425607	0.736252	ALJ61084.1	3-phosphoshikimate 1-carboxyvinyltransferase	EC2.5.1.19
BcellWH2_05081	1.1	5.26	0.188833	0.529379	ALJ62289.1	acid-resistance membrane protein	Unknown
BcellWH2_05020	0.94	5.91	0.151158	0.479186	ALJ62229.1	hypothetical protein	Unknown
BcellWH2_01944	0.5	7.94	0.0637737	0.316636	ALJ59190.1	hypothetical protein	Unknown
BcellWH2_01250	1.75	2.45	0.338461	0.67859	ALJ58512.1	NADH dehydrogenase subunit I
BcellWH2_04442	1.3	-0.31	0.469898	0.76267	ALJ61659.1	hypothetical protein	Unknown
BcellWH2_03890	1.4	-0.08	0.456734	0.756765	ALJ61111.1	Ribosomal RNA small subunit methyltransferase D	EC2.1.1.171
BcellWH2_03710	-1.48	-0.01	0.457737	0.757616	ALJ60932.1	Ribosomal RNA small subunit methyltransferase I	EC2.1.1.198
BcellWH2_01634	1.1	4.98	0.195589	0.537284	ALJ58887.1	Rhamnogalacturonan acetylesterase RhgT	EC3.1.1.11	CE12	BcellWH2:16	BcellWH2:17
BcellWH2_04323	-0.48	8.58	0.0515099	0.284642	ALJ61540.1	Endo-1,4-beta-xylanase A precursor	EC3.2.1.8	GH10-CBM22-CBM22	BcellWH2:87	BcellWH2:104
BcellWH2_04114	1.57	3.35	0.310737	0.654875	ALJ61334.1	Plasmid pRiA4b ORF-3-like protein	Unknown
BcellWH2_03137	1.41	4.59	0.25261	0.599302	ALJ60374.1	Pyruvate kinase	EC2.7.1.40
BcellWH2_03824	-0.64	7.16	0.0878962	0.373264	ALJ61046.1	Pectic acid lyase	EC3.1.1.11	PL10_1
BcellWH2_00051	-0.52	7.89	0.0683808	0.327897	ALJ57327.1	Peptidase M16 inactive domain protein	EC3.4.24.-
BcellWH2_03805	0.43	9.06	0.0432496	0.261146	ALJ61027.1	TonB-dependent Receptor Plug Domain protein	NOT DEFINED		BcellWH2:82	BcellWH2:91
BcellWH2_04367	1.65	0.92	0.470205	0.76267	ALJ61584.1	TDP-4-oxo-6-deoxy-alpha-D-glucose-3, 4-oxoisomerase	EC5.3.2.3
BcellWH2_01235	-1.59	3.34	0.287002	0.632283	ALJ58497.1	hypothetical protein	Unknown
BcellWH2_01815	0.68	7.02	0.092432	0.383464	ALJ59068.1	transport protein TonB	NOT DEFINED
BcellWH2_02763	-1.35	4.19	0.25734	0.603594	ALJ60002.1	hypothetical protein	Unknown
BcellWH2_01861	-0.8	6.56	0.108014	0.411284	ALJ59114.1	Histidine phosphatase superfamily (branch 2)	Unknown
BcellWH2_02130	-1.47	0.97	0.444667	0.747455	ALJ59373.1	hypothetical protein
BcellWH2_02301	0.55	8.06	0.0623262	0.31275	ALJ59541.1	Tetratricopeptide repeat protein	NOT DEFINED
BcellWH2_00384	-1.68	2.2	0.367631	0.702249	ALJ57659.1	Putative pyridoxal phosphate-dependent aminotransferase EpsN	EC2.6.1.-
BcellWH2_00013	-1.34	5.05	0.235936	0.58837	ALJ57290.1	Phage terminase, small subunit	Unknown
BcellWH2_01817	1.27	4.52	0.234386	0.587457	ALJ59070.1	tRNA (guanine-N(7)-)-methyltransferase
BcellWH2_00226	1.28	-0.13	0.48909	0.773942	ALJ57502.1	hypothetical protein	Unknown
BcellWH2_03586	-0.94	6.54	0.115799	0.423944	ALJ60809.1	Dihydrolipoyllysine-residue acetyltransferase component of pyruvate dehydrogenase complex	EC2.3.1.61
BcellWH2_04059	0.43	9.34	0.0379045	0.245733	ALJ61279.1	Beta-xylosidase	EC3.2.1.37|EC3.2.1.55	GH43_10	BcellWH2:83
BcellWH2_04959	-1.16	5.27	0.205281	0.55175	ALJ62168.1	hypothetical protein	Unknown
BcellWH2_02470	-1.25	-0.02	0.49578	0.778053	ALJ59709.1	CDP-GlycerolPoly(glycerophosphate) glycerophosphotransferase	EC2.7.8.12
BcellWH2_04447	0.85	5.95	0.141772	0.46765	ALJ61664.1	hypothetical protein	Unknown
BcellWH2_05450	1.62	1.43	0.402434	0.719326	ALJ62649.1	hypothetical protein
BcellWH2_04558	-0.92	6.04	0.148712	0.477869	ALJ61773.1	putative enoyl-CoA hydratase 1	Unknown
BcellWH2_01280	1.38	4.32	0.245256	0.591236	ALJ58541.1	Septum formation protein Maf	NOT DEFINED
BcellWH2_04648	-1.72	1.56	0.401187	0.719136	ALJ61862.1	recombinase A	NOT DEFINED
BcellWH2_01219	-0.56	7.79	0.0676378	0.326309	ALJ58481.1	Endonuclease/Exonuclease/phosphatase family protein	Unknown
BcellWH2_00196	1.47	3.64	0.326127	0.668286	ALJ57472.1	hypothetical protein	Unknown
BcellWH2_04429	1.45	0.55	0.473189	0.764498	ALJ61646.1	Glyoxalase/Bleomycin resistance protein/Dioxygenase superfamily protein	EC5.1.99.1
BcellWH2_00050	-1.3	0.07	0.484773	0.769311	ALJ57326.1	MORN repeat protein	EC2.7.11.1
BcellWH2_01568	-0.66	7.24	0.0901554	0.378987	ALJ58822.1	Multidrug export protein MepA	Unknown
BcellWH2_01695	-1.36	0.86	0.479872	0.768282	ALJ58948.1	Bifunctional oligoribonuclease and PAP phosphatase NrnA	EC3.1.3.7:EC3.1.13.3
BcellWH2_00917	-1.1	6.35	0.154324	0.482784	ALJ58179.1	Aldose 1-epimerase precursor	EC5.1.3.3
BcellWH2_01094	0.65	7.23	0.0877835	0.373264	ALJ58356.1	hypothetical protein	Unknown		BcellWH2:7
BcellWH2_03852	1.4	2.08	0.358652	0.695771	ALJ61074.1	hypothetical protein	Unknown
BcellWH2_05000	1.55	5.44	0.232291	0.585595	ALJ62209.1	inosine 5'-monophosphate dehydrogenase	EC1.13.12.16
BcellWH2_00675	-1.09	-0.23	0.540623	0.805342	ALJ57942.1	GDP-mannose 4,6-dehydratase	EC4.2.1.47
BcellWH2_00817	0.98	6.06	0.143122	0.468843	ALJ58080.1	hypothetical protein	Unknown
BcellWH2_05497	1.56	1.84	0.413196	0.728304	ALJ62695.1	hypothetical protein
BcellWH2_00269	1.26	0.42	0.543175	0.807212	ALJ57545.1	hypothetical protein	Unknown
BcellWH2_01855	0.68	7.02	0.0975844	0.393317	ALJ59108.1	Hydroxymethylpyrimidine/phosphomethylpyrimidine kinase	EC2.7.1.49:EC2.7.4.7
BcellWH2_01662	0.84	6.06	0.142344	0.467786	ALJ58915.1	O-GlcNAcase NagJ precursor	EC3.2.1.97	CBM	BcellWH2:17	BcellWH2:19
BcellWH2_03718	-1.19	0.03	0.511609	0.788616	ALJ60940.1	Helix-turn-helix domain protein	Unknown
BcellWH2_01216	1.21	0.24	0.511823	0.788616	ALJ58478.1	hypothetical protein	Unknown
BcellWH2_04409	-0.8	6.74	0.109118	0.413538	ALJ61626.1	site-specific tyrosine recombinase XerC	Unknown
BcellWH2_02124	0.48	8.51	0.0598341	0.308386	ALJ59367.1	Tyrosine recombinase XerC	NOT DEFINED
BcellWH2_02276	-0.49	9.11	0.0431935	0.261139	ALJ59516.1	Glycosyl hydrolases family 2, sugar binding domain	Unknown	GH106	BcellWH2:36	BcellWH2:40
BcellWH2_00122	1.49	1.37	0.452044	0.754049	ALJ57398.1	hypothetical protein	Unknown
BcellWH2_04664	-1.47	1.11	0.520555	0.794046	ALJ61878.1	N-acetylmuramoyl-L-alanine amidase	EC3.5.1.28
BcellWH2_05204	1.34	4.64	0.230648	0.583346	ALJ62407.1	Pyruvate formate-lyase 1-activating enzyme	EC1.97.1.4
BcellWH2_01548	1.63	1.49	0.450171	0.752979	ALJ58802.1	Acyl-ACP thioesterase	EC3.1.2.21
BcellWH2_02635	0.67	6.89	0.0954665	0.389785	ALJ59874.1	Spore maturation protein A	NOT DEFINED
BcellWH2_02149	1.35	3.51	0.304612	0.649695	ALJ59390.1	hypothetical protein	Unknown
BcellWH2_00198	-1.38	0.9	0.489296	0.773942	ALJ57474.1	Acyltransferase family protein	EC2.3.1.-
BcellWH2_00827	-0.5	8.3	0.0602848	0.308766	ALJ58090.1	ParB-like nuclease domain protein	Unknown
BcellWH2_05334	1.33	0.66	0.511807	0.788616	ALJ62536.1	Nicotinamide-nucleotide amidohydrolase PncC	EC3.5.1.42
BcellWH2_05160	-1.55	3.5	0.311805	0.65649	ALJ62368.1	Acyl carrier protein	NOT DEFINED
BcellWH2_00550	-1.26	0.51	0.531399	0.800383	ALJ57818.1	hypothetical protein	Unknown
BcellWH2_05216	1.45	1.07	0.479195	0.768004	ALJ62419.1	Nucleotidyltransferase substrate binding protein like protein	Unknown
BcellWH2_00401	-1.42	1.21	0.429975	0.738503	ALJ57676.1	hypothetical protein	Unknown
BcellWH2_01753	-1.09	0.19	0.578532	0.828567	ALJ59006.1	P-protein	EC4.2.1.51
BcellWH2_03814	-1.04	5.88	0.189586	0.530116	ALJ61036.1	hypothetical protein	Unknown
BcellWH2_05345	0.99	-0.01	0.57822	0.82837	ALJ62547.1	hypothetical protein	Unknown
BcellWH2_04182	1.2	4.36	0.270663	0.614658	ALJ61401.1	hypothetical protein
BcellWH2_04022	1.21	0.41	0.542652	0.8071	ALJ61242.1	NADH-quinone oxidoreductase subunit K	EC1.6.5.3
BcellWH2_04379	-1.3	1.06	0.520626	0.794046	ALJ61596.1	acyl carrier protein	NOT DEFINED
BcellWH2_00595	1.47	3.96	0.331656	0.672943	ALJ57863.1	Type I restriction modification DNA specificity domain protein	EC3.1.21.3
BcellWH2_01603	1.21	6.04	0.195282	0.537284	ALJ58856.1	tRNA 2'-O-methylase	NOT DEFINED
BcellWH2_00426	-1.01	0.13	0.594021	0.837818	ALJ57701.1	ATP-dependent helicase/nuclease subunit A	EC3.1.-.-:EC3.6.4.12
BcellWH2_01917	1.63	2.76	0.362378	0.698022	ALJ59168.1	hypothetical protein	Unknown
BcellWH2_00872	1.05	0.22	0.559454	0.817983	ALJ58134.1	hypothetical protein
BcellWH2_02687	1.48	1.71	0.458156	0.757616	ALJ59926.1	Ribosome-binding ATPase YchF	NOT DEFINED
BcellWH2_02496	-1.56	2.76	0.362313	0.698022	ALJ59735.1	hypothetical protein	Unknown
BcellWH2_01978	-0.81	6.48	0.126691	0.443244	ALJ59223.1	hypothetical protein	Unknown
BcellWH2_03363	1.48	1.91	0.454178	0.754899	ALJ60596.1	hypothetical protein	Unknown
BcellWH2_04533	-1.42	1.94	0.464006	0.760552	ALJ61749.1	hypothetical protein	Unknown
BcellWH2_00610	-0.88	6.51	0.145381	0.472861	ALJ57878.1	D-3-phosphoglycerate dehydrogenase	EC1.1.1.95:EC1.1.1.399
BcellWH2_05317	-1.02	-0.01	0.580629	0.830041	ALJ62519.1	hypothetical protein	EC3.2.1.107
BcellWH2_05427	-1.05	0.12	0.592749	0.836822	ALJ62626.1	dTDP-4-dehydrorhamnose 3,5-epimerase	EC5.1.3.13
BcellWH2_01828	0.39	9.37	0.0397992	0.250497	ALJ59081.1	TonB dependent receptor	Unknown		BcellWH2:21	BcellWH2:25
BcellWH2_05346	0.98	0.07	0.635496	0.859873	ALJ62548.1	von Willebrand factor type A domain protein	NOT DEFINED
BcellWH2_00999	-0.44	8.46	0.0567632	0.300805	ALJ58261.1	Peptidoglycan O-acetyltransferase	NOT DEFINED
BcellWH2_04337	-1.29	1.49	0.511455	0.788616	ALJ61554.1	putative HTH-type transcriptional regulator YddM	NOT DEFINED
BcellWH2_00896	1.12	0.61	0.554158	0.815894	ALJ58158.1	Sulfate adenylyltransferase subunit 2	EC2.7.7.4
BcellWH2_02397	-1.23	5.19	0.238326	0.589456	ALJ59636.1	Magnesium transport protein CorA	NOT DEFINED
BcellWH2_04512	0.48	8.44	0.05843	0.303785	ALJ61728.1	Heparinase II/III-like protein	Unknown	PL
BcellWH2_04713	-1.5	1.74	0.455079	0.755391	ALJ61926.1	Helix-turn-helix domain protein	Unknown
BcellWH2_03471	0.59	7.48	0.0822305	0.360479	ALJ60700.1	Starch-binding associating with outer membrane	Unknown		BcellWH2:72	BcellWH2:81
BcellWH2_03896	1.16	5.09	0.232936	0.585814	ALJ61117.1	Murein DD-endopeptidase MepM	EC3.4.-.-
BcellWH2_04874	0.49	8.32	0.0606925	0.309504	ALJ62083.1	Putative multidrug export ATP-binding/permease protein	NOT DEFINED
BcellWH2_00789	1.16	4.92	0.243148	0.589456	ALJ58052.1	Phage antirepressor protein KilAC domain protein	NOT DEFINED
BcellWH2_05498	-0.95	6.15	0.168097	0.505568	ALJ62696.1	Regulatory protein PchR	Unknown
BcellWH2_01620	-1.31	4.11	0.301426	0.647225	ALJ58873.1	hypothetical protein	Unknown
BcellWH2_00126	1.22	0.81	0.551426	0.813324	ALJ57402.1	hypothetical protein	Unknown
BcellWH2_01448	0.91	5.86	0.150446	0.478716	ALJ58709.1	putative metallophosphoesterase	NOT DEFINED
BcellWH2_05454	0.63	7.69	0.0751555	0.34573	ALJ62653.1	Tyrosine-protein kinase etk	EC2.7.10.-
BcellWH2_05208	-1.4	3.13	0.389277	0.714859	ALJ62411.1	hypothetical protein	Unknown
BcellWH2_03832	-1.54	3.4	0.345687	0.685697	ALJ61054.1	Tetratricopeptide repeat protein	Unknown
BcellWH2_03971	-1.11	5.51	0.224919	0.577113	ALJ61191.1	T4-like virus tail tube protein gp19	Unknown
BcellWH2_04980	0.72	7.03	0.106074	0.407755	ALJ62189.1	putative glycosyl transferase	NOT DEFINED	GT4
BcellWH2_02903	1.52	1.88	0.446072	0.748626	ALJ60142.1	hypothetical protein	Unknown
BcellWH2_05156	1.33	4.66	0.261523	0.606872	ALJ62364.1	hypothetical protein	Unknown
BcellWH2_01886	-1.32	2	0.479535	0.768282	ALJ59137.1	hypothetical protein	Unknown
BcellWH2_03112	-1.65	2.72	0.414854	0.730398	ALJ60349.1	Tetratricopeptide repeat protein	NOT DEFINED
BcellWH2_03140	-0.73	6.8	0.118032	0.427833	ALJ60377.1	Sensory/regulatory protein RpfC	EC2.1.1.80:EC3.1.1.61
BcellWH2_04875	-0.6	7.78	0.0749365	0.345075	ALJ62084.1	Iron import ATP-binding/permease protein IrtA	NOT DEFINED
BcellWH2_04550	1.52	3.76	0.319409	0.660303	ALJ61765.1	hypothetical protein	EC3.2.2.27
BcellWH2_04434	0.53	8.1	0.0707202	0.334313	ALJ61651.1	hypothetical protein	NOT DEFINED
BcellWH2_02004	-0.47	8.97	0.0478149	0.274463	ALJ59249.1	Non-reducing end beta-L-arabinofuranosidase	NOT DEFINED	GH127	BcellWH2:27
BcellWH2_01609	1.23	1.55	0.536015	0.803256	ALJ58862.1	mce related protein	NOT DEFINED
BcellWH2_01326	1.41	4.59	0.299226	0.645155	ALJ58587.1	hypothetical protein	NOT DEFINED
BcellWH2_04784	0.84	0.01	0.657507	0.870825	ALJ61995.1	hypothetical protein
BcellWH2_01426	-0.8	-0.14	0.674808	0.877659	ALJ58687.1	hypothetical protein	Unknown
BcellWH2_01515	-0.73	6.85	0.112243	0.416609	ALJ58770.1	Iron(3+)-hydroxamate import ATP-binding protein FhuC	EC3.6.3.34
BcellWH2_00035	-0.89	0.09	0.646148	0.865172	ALJ57312.1	hypothetical protein	Unknown
BcellWH2_01651	-0.42	8.99	0.0466125	0.271085	ALJ58904.1	Retaining alpha-galactosidase precursor	EC3.2.1.20	GH97-GH43_19	BcellWH2:17	BcellWH2:18
BcellWH2_01893	0.95	5.37	0.193878	0.535466	ALJ59144.1	hypothetical protein	Unknown
BcellWH2_04984	0.49	8.15	0.0653171	0.320317	ALJ62193.1	hypothetical protein	Unknown
BcellWH2_00528	-1.26	1.45	0.507381	0.785878	ALJ57796.1	Putative pyridoxal phosphate-dependent aminotransferase EpsN	EC2.6.1.-
BcellWH2_03364	0.91	5.34	0.202093	0.546894	ALJ60597.1	hypothetical protein	Unknown
BcellWH2_03893	-0.78	7.05	0.102624	0.403132	ALJ61114.1	ATP-dependent RecD-like DNA helicase	EC3.1.11.5
BcellWH2_02047	0.61	7.7	0.0764363	0.348908	ALJ59292.1	hypothetical protein	Unknown
BcellWH2_04464	-1.16	1.25	0.572991	0.824912	ALJ61681.1	Type III pantothenate kinase	EC2.7.1.33
BcellWH2_03755	0.81	-0.11	0.669839	0.876398	ALJ60977.1	Chromosome-partitioning ATPase Soj	NOT DEFINED
BcellWH2_02769	1.4	1.82	0.466426	0.76193	ALJ60008.1	hypothetical protein
BcellWH2_00237	0.88	5.7	0.193177	0.535356	ALJ57513.1	hypothetical protein	Unknown
BcellWH2_00080	-0.68	0.06	0.712159	0.896073	ALJ57356.1	ATP synthase subunit alpha	EC3.6.3.14
BcellWH2_04300	1.3	5.22	0.25293	0.599388	ALJ61517.1	hypothetical protein	Unknown		BcellWH2:87	BcellWH2:102
BcellWH2_03323	1	5.43	0.205101	0.55158	ALJ60556.1	hypothetical protein	Unknown
BcellWH2_02879	1.28	3.48	0.298196	0.643924	ALJ60118.1	Cell division protein FtsX	NOT DEFINED
BcellWH2_03478	-0.69	6.84	0.112194	0.416609	ALJ60707.1	Thiol-disulfide oxidoreductase ResA	Unknown
BcellWH2_04405	-0.78	0.06	0.700679	0.890361	ALJ61622.1	hypothetical protein	Unknown
BcellWH2_00878	1.6	4.19	0.306133	0.650892	ALJ58140.1	Peptide deformylase	EC3.5.1.88
BcellWH2_03447	1.28	4.89	0.242462	0.589456	ALJ60676.1	hypothetical protein	Unknown
BcellWH2_04928	-1.26	3.64	0.304811	0.649695	ALJ62137.1	Bacterial alpha-L-rhamnosidase	EC3.2.1.40	GH78
BcellWH2_00617	-0.63	-0.26	0.72485	0.902643	ALJ57885.1	Na(+)-translocating NADH-quinone reductase subunit B	EC1.6.5.8
BcellWH2_03253	0.55	7.76	0.0771502	0.35083	ALJ60487.1	SusD family protein	NOT DEFINED		BcellWH2:67	BcellWH2:76
BcellWH2_05369	1.14	1.44	0.545404	0.807654	ALJ62569.1	AMP nucleosidase	EC3.2.2.4
BcellWH2_01223	0.5	7.94	0.0695701	0.331419	ALJ58485.1	Outer membrane efflux protein	NOT DEFINED
BcellWH2_01112	0.81	0.02	0.668756	0.875846	ALJ58374.1	Toxin HigB	Unknown
BcellWH2_04885	-0.62	7.21	0.0922959	0.383383	ALJ62094.1	hypothetical protein	Unknown
BcellWH2_03186	0.73	7.17	0.102673	0.403132	ALJ60423.1	fec operon regulator FecR	Unknown		BcellWH2:65	BcellWH2:74
BcellWH2_04340	-1.48	3.51	0.355598	0.692826	ALJ61557.1	hypothetical protein	Unknown
BcellWH2_01730	0.78	0.03	0.689952	0.88739	ALJ58983.1	hypothetical protein	Unknown
BcellWH2_03577	-0.71	0	0.702722	0.891679	ALJ60800.1	5,10-methylenetetrahydrofolate reductase	EC1.5.1.20
BcellWH2_03976	-1.39	2.39	0.444906	0.747594	ALJ61196.1	PAAR motif protein	Unknown
BcellWH2_04209	-0.55	-0.12	0.774602	0.914853	ALJ61426.1	GMP synthase [glutamine-hydrolyzing]	EC6.3.5.2
BcellWH2_05526	1.13	0.74	0.567917	0.822035	ALJ62724.1	xanthine-guanine phosphoribosyltransferase	NOT DEFINED
BcellWH2_04208	0.5	0.58	0.793535	0.922877	ALJ61425.1	Large-conductance mechanosensitive channel	NOT DEFINED
BcellWH2_04204	0.64	0	0.749389	0.912493	ALJ61421.1	tRNA-specific adenosine deaminase	EC3.5.4.12
BcellWH2_02189	-0.69	0.71	0.730854	0.905699	ALJ59430.1	Putative 1,2-phenylacetyl-CoA epoxidase, subunit D	Unknown
BcellWH2_01149	1.44	4.24	0.336486	0.677005	ALJ58411.1	hypothetical protein	Unknown
BcellWH2_02835	0.58	-0.16	0.764987	0.914853	ALJ60074.1	hypothetical protein	Unknown
BcellWH2_05033	-1.27	4.43	0.302047	0.647966	ALJ62242.1	Pyridoxamine 5'-phosphate oxidase	Unknown
BcellWH2_00932	-1.3	2.84	0.443328	0.746526	ALJ58194.1	L-arabinose isomerase	EC5.3.1.4		BcellWH2:5	BcellWH2:5
BcellWH2_04781	0.6	0.11	0.749677	0.912493	ALJ61992.1	hypothetical protein	Unknown
BcellWH2_04560	-1.12	1.43	0.573897	0.824912	ALJ61775.1	hypothetical protein
BcellWH2_01772	0.72	-0.01	0.696198	0.887915	ALJ59025.1	hypothetical protein
BcellWH2_03806	0.49	8.37	0.0622341	0.312618	ALJ61028.1	SusD family protein	NOT DEFINED		BcellWH2:82	BcellWH2:91
BcellWH2_03024	-0.61	7.59	0.0818061	0.360164	ALJ60262.1	Aldose 1-epimerase precursor	EC5.1.3.3
BcellWH2_00614	0.37	-0.21	0.840821	0.944634	ALJ57882.1	Na(+)-translocating NADH-quinone reductase subunit E	EC1.6.5.8
BcellWH2_02664	1.41	3.45	0.380188	0.712964	ALJ59903.1	hypothetical protein	Unknown
BcellWH2_00258	-0.61	-0.22	0.735701	0.908066	ALJ57534.1	hypothetical protein	Unknown
BcellWH2_02299	-1.33	3.99	0.339705	0.679982	ALJ59539.1	CYTH domain protein	EC4.6.1.1
BcellWH2_00070	-0.65	7.3	0.0910121	0.380044	ALJ57346.1	Lactaldehyde reductase	EC1.1.1.77
BcellWH2_02829	0.86	0.41	0.672687	0.87744	ALJ60068.1	hypothetical protein	Unknown		BcellWH2:52
BcellWH2_00746	-1.21	2.41	0.501008	0.781649	ALJ58010.1	Cellobiose 2-epimerase	EC5.1.3.8		BcellWH2:3	BcellWH2:3
BcellWH2_03943	1.42	3.1	0.3642	0.699883	ALJ61163.1	Ribosomal RNA small subunit methyltransferase A	EC2.1.1.182
BcellWH2_01309	-1.22	1.41	0.520779	0.794046	ALJ58570.1	hypothetical protein	Unknown
BcellWH2_00839	-0.55	0.22	0.775713	0.915595	ALJ58102.1	hypothetical protein	Unknown
BcellWH2_01322	1.38	2.42	0.466039	0.76193	ALJ58583.1	hypothetical protein	Unknown
BcellWH2_01816	-1.46	3.42	0.375662	0.709235	ALJ59069.1	Septum site-determining protein MinD	NOT DEFINED
BcellWH2_04613	-0.27	-0.13	0.885893	0.960373	ALJ61828.1	Thiamine biosynthesis lipoprotein ApbE precursor	EC2.7.1.180
BcellWH2_00329	-1.45	2.82	0.420535	0.73304	ALJ57604.1	Putative phosphoserine phosphatase 2	EC3.1.3.73
BcellWH2_01087	0.14	-0.17	0.935605	0.97649	ALJ58349.1	hypothetical protein
BcellWH2_03398	1.28	4.04	0.33894	0.679024	ALJ60631.1	Ribosome hibernation promoting factor	NOT DEFINED
BcellWH2_03082	-1.44	3.08	0.396665	0.716415	ALJ60319.1	hypothetical protein	EC2.3.1.-
BcellWH2_01567	-0.35	-0.1	0.849779	0.947757	ALJ58821.1	cytidylate kinase	EC2.7.4.25
BcellWH2_02411	1.6	3	0.385055	0.71331	ALJ59650.1	fec operon regulator FecR	Unknown
BcellWH2_00242	-0.78	0.39	0.686748	0.886521	ALJ57518.1	hypothetical protein	Unknown
BcellWH2_01056	0.6	-0.01	0.744765	0.912493	ALJ58318.1	Single-stranded DNA-binding protein	NOT DEFINED
BcellWH2_04007	0.51	7.47	0.0873367	0.373264	ALJ61227.1	hypothetical protein	Unknown
BcellWH2_00131	0.13	-0.27	0.941164	0.978646	ALJ57407.1	hypothetical protein	Unknown
BcellWH2_01268	-1.01	1.49	0.62266	0.852668	ALJ58530.1	hypothetical protein	Unknown
BcellWH2_01328	1.43	3.33	0.364232	0.699883	ALJ58589.1	hypothetical protein	Unknown
BcellWH2_04918	0.56	7.79	0.0756658	0.347069	ALJ62127.1	Type I restriction modification DNA specificity domain protein	EC3.1.21.3
BcellWH2_02711	1.4	2.09	0.491564	0.776309	ALJ59950.1	Antitoxin YefM	NOT DEFINED
BcellWH2_04033	1.3	1.83	0.522775	0.795461	ALJ61253.1	1-deoxy-D-xylulose-5-phosphate synthase	EC2.2.1.7
BcellWH2_03731	-0.08	0.11	0.969002	0.989487	ALJ60953.1	hypothetical protein	Unknown
BcellWH2_01352	-1.38	5.05	0.260721	0.606872	ALJ58613.1	Acryloyl-CoA reductase electron transfer subunit beta	NOT DEFINED
BcellWH2_01910	0.99	1.27	0.646738	0.865179	ALJ59161.1	L-cystine import ATP-binding protein TcyC	NOT DEFINED
BcellWH2_04382	0.23	0.27	0.909417	0.968345	ALJ61599.1	Putative undecaprenyl-phosphate N-acetylgalactosaminyl 1-phosphate transferase	NOT DEFINED
BcellWH2_04701	-0.46	0.18	0.803734	0.927849	ALJ61915.1	hypothetical protein	Unknown
BcellWH2_02709	-0.98	6.01	0.175591	0.513799	ALJ59948.1	Bacterial DNA-binding protein	Unknown
BcellWH2_02587	-0.58	8.24	0.0664858	0.323378	ALJ59826.1	putative sugar kinase YdjH	EC2.7.1.4
BcellWH2_03895	-0.07	-0.06	0.968974	0.989487	ALJ61116.1	Alanine--tRNA ligase	EC6.1.1.7
BcellWH2_03261	-1.23	1.81	0.494899	0.777421	ALJ60495.1	Acetylxylan esterase precursor	Unknown		BcellWH2:67	BcellWH2:76
BcellWH2_00081	-0.18	-0.18	0.924911	0.972169	ALJ57357.1	ATP synthase subunit delta	NOT DEFINED
BcellWH2_04303	0.41	8.99	0.0480271	0.274463	ALJ61520.1	Cellulase (glycosyl hydrolase family 5)	EC3.2.1.4	GH5_21	BcellWH2:87	BcellWH2:102
BcellWH2_03797	1.04	1.79	0.608404	0.845114	ALJ61019.1	hypothetical protein
BcellWH2_01261	0.45	8.77	0.0545606	0.295972	ALJ58523.1	hypothetical protein	Unknown
BcellWH2_04270	-0.15	-0.1	0.941086	0.978646	ALJ61487.1	hypothetical protein	Unknown
BcellWH2_04823	-0.55	7.63	0.0871411	0.373264	ALJ62032.1	Retaining alpha-galactosidase precursor	EC3.2.1.20	GH97	BcellWH2:90
BcellWH2_04741	0.62	0.47	0.746201	0.912493	ALJ61953.1	RNA polymerase sigma factor YlaC	NOT DEFINED
BcellWH2_02893	0.67	6.88	0.114915	0.422007	ALJ60132.1	hypothetical protein	Unknown
BcellWH2_04806	-0.85	0.88	0.694931	0.887915	ALJ62015.1	Cypemycin methyltransferase	Unknown
BcellWH2_01194	1.11	4.99	0.280735	0.62642	ALJ58456.1	Phospho-2-dehydro-3-deoxyheptonate aldolase	EC5.4.99.5
BcellWH2_03993	0.9	1.39	0.667114	0.875389	ALJ61213.1	putative GTPase	EC2.7.-.-
BcellWH2_03157	0.78	6.44	0.129764	0.446841	ALJ60394.1	hypothetical protein	Unknown
BcellWH2_04790	0.5	8.3	0.0646473	0.319671	ALJ62000.1	Autoinducer 2 sensor kinase/phosphatase LuxQ	EC2.1.1.80:EC3.1.1.61
BcellWH2_00066	0.39	9.28	0.0433115	0.261188	ALJ57342.1	Macrolide export ATP-binding/permease protein MacB	NOT DEFINED
BcellWH2_05266	-1.1	1.89	0.558786	0.817534	ALJ62468.1	hypothetical protein
BcellWH2_00732	0.8	6.19	0.143116	0.468843	ALJ57996.1	Ribokinase	EC2.7.1.15		BcellWH2:2	BcellWH2:3
BcellWH2_01550	-1.27	3.84	0.314165	0.656537	ALJ58804.1	Acetolactate synthase isozyme 2 large subunit	EC2.2.1.6
BcellWH2_04596	-1.42	2.82	0.484068	0.769105	ALJ61811.1	hypothetical protein	Unknown
BcellWH2_03764	0.58	7.69	0.0868426	0.373264	ALJ60986.1	hypothetical protein	Unknown
BcellWH2_03741	0.83	0.91	0.676141	0.878611	ALJ60963.1	hypothetical protein	Unknown
BcellWH2_03709	-1.47	2.78	0.453102	0.754049	ALJ60931.1	hypothetical protein	Unknown
BcellWH2_04614	1.2	1.52	0.509991	0.78761	ALJ61829.1	putative manganese efflux pump MntP	Unknown
BcellWH2_00162	-1.14	5.07	0.2539	0.5996	ALJ57438.1	hypothetical protein	Unknown
BcellWH2_03780	-0.37	0.08	0.848726	0.947757	ALJ61002.1	hypothetical protein	Unknown
BcellWH2_02532	-0.04	0.03	0.984022	0.992888	ALJ59771.1	4-hydroxy-tetrahydrodipicolinate reductase	EC1.17.1.8
BcellWH2_04145	-0.64	7.32	0.0930309	0.38442	ALJ61365.1	preprotein translocase subunit SecD	Unknown
BcellWH2_00205	0.42	8.75	0.0519167	0.286537	ALJ57481.1	Tyrosine-protein kinase ptk	EC2.7.10.-
BcellWH2_02866	1.36	3.89	0.378772	0.71204	ALJ60105.1	Propionyl-CoAsuccinate CoA transferase	EC3.1.2.1
BcellWH2_00859	-1.45	3.18	0.390003	0.714859	ALJ58121.1	hypothetical protein	Unknown
BcellWH2_01622	0.01	0.08	0.997572	0.998425	ALJ58875.1	50S ribosomal protein L9	NOT DEFINED
BcellWH2_05021	1.33	3.85	0.39281	0.714859	ALJ62230.1	hypothetical protein	Unknown
BcellWH2_00116	-1.08	4.84	0.2821	0.62642	ALJ57392.1	hypothetical protein	Unknown
BcellWH2_04520	-1.38	2.38	0.53314	0.801731	ALJ61736.1	Copper homeostasis protein CutC	NOT DEFINED
BcellWH2_00551	-0.07	0.67	0.970911	0.990037	ALJ57819.1	transcriptional activator RfaH	NOT DEFINED
BcellWH2_01254	-1.1	5.5	0.234513	0.587457	ALJ58516.1	hypothetical protein	Unknown
BcellWH2_01796	-0.22	-0.18	0.908024	0.968345	ALJ59049.1	hypothetical protein	Unknown
BcellWH2_04475	0.36	0.31	0.858579	0.950376	ALJ61692.1	hypothetical protein	Unknown
BcellWH2_04401	0.91	5.41	0.211794	0.562573	ALJ61618.1	hypothetical protein	Unknown
BcellWH2_01042	-0.66	0.42	0.722647	0.900844	ALJ58304.1	Thioredoxin C-2	NOT DEFINED
BcellWH2_03344	-0.55	7.83	0.0763796	0.348908	ALJ60577.1	Endoglucanase A precursor	EC3.2.1.4	GH5_4
BcellWH2_00003	-1.1	1.57	0.53833	0.804448	ALJ57280.1	DNA adenine methyltransferase YhdJ
BcellWH2_02605	-0.56	8.19	0.0701403	0.332602	ALJ59844.1	N-acetylmuramoyl-L-alanine amidase	EC3.5.1.28
BcellWH2_04127	1.23	4.47	0.282505	0.626734	ALJ61347.1	LemA family protein	NOT DEFINED
BcellWH2_03683	1.39	3.49	0.389029	0.714859	ALJ60906.1	hypothetical protein	Unknown
BcellWH2_04375	0.31	0.24	0.875547	0.955581	ALJ61592.1	Mycothiol acetyltransferase	Unknown
BcellWH2_03089	-0.8	0.91	0.687424	0.886521	ALJ60326.1	D-inositol 3-phosphate glycosyltransferase	EC2.4.1.-	GT4
BcellWH2_04005	0.7	6.86	0.121853	0.436355	ALJ61225.1	hypothetical protein	Unknown
BcellWH2_02077	1.17	2.3	0.583752	0.831531	ALJ59320.1	hypothetical protein			BcellWH2:29
BcellWH2_00482	-1.3	2.52	0.429015	0.738503	ALJ57750.1	Bacterial DNA-binding protein	Unknown
BcellWH2_03135	-1.36	3.67	0.384381	0.713305	ALJ60372.1	Tyrosine recombinase XerD	NOT DEFINED
BcellWH2_01818	-0.88	1.16	0.668147	0.875389	ALJ59071.1	Branched-chain-amino-acid aminotransferase
BcellWH2_01750	-0.96	5.66	0.194517	0.536473	ALJ59003.1	lipoprotein NlpI	NOT DEFINED
BcellWH2_01111	1.03	5.74	0.227086	0.578612	ALJ58373.1	ECF RNA polymerase sigma factor SigW	NOT DEFINED		BcellWH2:8
BcellWH2_00521	-1.24	4.94	0.275734	0.620107	ALJ57789.1	Exodeoxyribonuclease	EC3.1.11.2
BcellWH2_05243	1.04	0.95	0.564561	0.819425	ALJ62445.1	L-asparaginase 1	EC3.5.1.1
BcellWH2_05124	0.69	0.8	0.746865	0.912493	ALJ62332.1	ECF RNA polymerase sigma factor SigW	NOT DEFINED
BcellWH2_04372	-0.07	-0.02	0.971415	0.990037	ALJ61589.1	hypothetical protein	Unknown
BcellWH2_04751	-0.46	8.66	0.0570631	0.300997	ALJ61962.1	Regulatory protein PchR	NOT DEFINED
BcellWH2_04163	0.54	0.56	0.782222	0.91758	ALJ61383.1	helix-turn-helix protein	NOT DEFINED
BcellWH2_05279	-1.06	4.91	0.273493	0.618368	ALJ62481.1	L-fuculose phosphate aldolase	EC4.1.2.17
BcellWH2_03072	-0.66	0.87	0.748837	0.912493	ALJ60310.1	site-specific tyrosine recombinase XerC	Unknown
BcellWH2_01459	1.18	2.21	0.49505	0.777421	ALJ58720.1	DNA alkylation repair enzyme	EC3.4.14.4
BcellWH2_03532	-0.03	0.28	0.989128	0.996045	ALJ60755.1	hypothetical protein
BcellWH2_01593	-0.07	-0.2	0.966176	0.989372	ALJ58847.1	Antitoxin YefM	NOT DEFINED
BcellWH2_05199	-1.21	5.91	0.240714	0.589456	ALJ62402.1	Maltodextrin phosphorylase	EC2.4.1.1	GT35
BcellWH2_00538	1.05	5.6	0.215104	0.565083	ALJ57806.1	hypothetical protein	NOT DEFINED
BcellWH2_03678	-0.94	1.67	0.651342	0.867792	ALJ60901.1	helix-turn-helix protein	Unknown
BcellWH2_04029	1.33	3.32	0.393404	0.714859	ALJ61249.1	hypothetical protein	Unknown
BcellWH2_05451	1.1	4.82	0.290028	0.634803	ALJ62650.1	Phd_YefM	NOT DEFINED
BcellWH2_04456	-1.04	1.62	0.560826	0.819007	ALJ61673.1	hypothetical protein	Unknown
BcellWH2_02628	0.53	7.81	0.0794755	0.355212	ALJ59867.1	hypothetical protein	Unknown
BcellWH2_05235	0.83	6.25	0.150417	0.478716	ALJ62437.1	hypothetical protein	Unknown	GT2
BcellWH2_00886	-0.42	9.08	0.0490015	0.277226	ALJ58148.1	hypothetical protein	Unknown
BcellWH2_04771	-0.55	7.79	0.0809412	0.359134	ALJ61982.1	Regulatory protein SdiA	NOT DEFINED
BcellWH2_04761	0.19	0.13	0.917496	0.970351	ALJ61972.1	hypothetical protein	Unknown
BcellWH2_00916	-0.24	0.13	0.900591	0.965833	ALJ58178.1	putative mannose-6-phosphate isomerase GmuF	EC5.3.1.8
BcellWH2_00249	-1.17	5.18	0.289364	0.634671	ALJ57525.1	Conjugative transposon protein TraO	Unknown
BcellWH2_01956	-1.24	4.61	0.314733	0.656537	ALJ59202.1	hypothetical protein	Unknown
BcellWH2_00099	0.54	7.64	0.089087	0.375636	ALJ57375.1	TonB-dependent Receptor Plug Domain protein
BcellWH2_00006	-0.29	0.42	0.890636	0.960941	ALJ57283.1	hypothetical protein	Unknown
BcellWH2_04850	-1.05	2.51	0.585931	0.832141	ALJ62059.1	hypothetical protein	Unknown
BcellWH2_00862	0.52	0.56	0.789808	0.922154	ALJ58124.1	hypothetical protein
BcellWH2_02745	1.31	4.54	0.330428	0.672092	ALJ59984.1	hypothetical protein
BcellWH2_03524	-1.42	3.68	0.41448	0.730297	ALJ60747.1	hypothetical protein	NOT DEFINED
BcellWH2_04947	0.6	0.97	0.77954	0.916843	ALJ62156.1	Glutaconyl-CoA decarboxylase subunit gamma	EC6.4.1.4
BcellWH2_01784	0.92	5.8	0.195476	0.537284	ALJ59037.1	hypothetical protein	NOT DEFINED
BcellWH2_04807	0.93	1.55	0.629717	0.856444	ALJ62016.1	hypothetical protein	Unknown
BcellWH2_01804	1.21	4.12	0.341783	0.682131	ALJ59057.1	hypothetical protein	Unknown
BcellWH2_01984	-0.36	0.6	0.847844	0.947757	ALJ59229.1	hypothetical protein	Unknown
BcellWH2_04102	0.66	7.26	0.104288	0.405204	ALJ61322.1	Alpha/beta hydrolase family protein	NOT DEFINED
BcellWH2_01135	1.29	4.2	0.308607	0.652938	ALJ58397.1	hypothetical protein	Unknown		BcellWH2:10
BcellWH2_00798	-0.88	1.54	0.685836	0.886104	ALJ58061.1	hypothetical protein	Unknown
BcellWH2_04787	-0.55	0.33	0.774406	0.914853	ALJ61997.1	Bifunctional protein FolD protein	EC1.5.1.5:EC3.5.4.9
BcellWH2_05195	-1.36	3.02	0.397882	0.716955	ALJ62398.1	V-type ATP synthase subunit D	NOT DEFINED
BcellWH2_03535	-0.99	1.12	0.611514	0.8477	ALJ60758.1	LytTr DNA-binding domain protein	Unknown
BcellWH2_03138	-1.31	3.29	0.438087	0.742013	ALJ60375.1	Putative O-methyltransferase/MSMEI_4947	EC2.1.1.104
BcellWH2_04675	0.37	1.05	0.851001	0.947757	ALJ61889.1	hypothetical protein	Unknown
BcellWH2_02248	-0.88	1.69	0.636323	0.860342	ALJ59489.1	BadF/BadG/BcrA/BcrD ATPase family protein	Unknown
BcellWH2_05070	0.88	6.56	0.138136	0.461943	ALJ62278.1	DNA repair protein RecN	NOT DEFINED
BcellWH2_04626	-1.07	2.08	0.58333	0.831411	ALJ61840.1	Thioredoxin-like protein	NOT DEFINED
BcellWH2_01010	-1.13	4.16	0.314021	0.656537	ALJ58272.1	Transposase DDE domain protein
BcellWH2_04962	-0.52	0.88	0.794436	0.923091	ALJ62171.1	hypothetical protein
BcellWH2_02608	-0.43	0.27	0.825217	0.935728	ALJ59847.1	hypothetical protein	Unknown
BcellWH2_01903	-0.81	1.74	0.674597	0.877659	ALJ59154.1	ATP-dependent DNA helicase RecQ	EC3.6.4.12
BcellWH2_05213	0.48	0.31	0.800502	0.92622	ALJ62416.1	hypothetical protein
BcellWH2_05544	1.23	3.27	0.44673	0.749333	ALJ62742.1	Bacteriophage Lambda NinG protein	Unknown
BcellWH2_01225	-0.9	5.7	0.186584	0.525928	ALJ58487.1	Transcriptional regulatory protein YpdB	NOT DEFINED
BcellWH2_02442	0.01	0.44	0.994302	0.996623	ALJ59681.1	hypothetical protein	Unknown
BcellWH2_04078	-0.6	0.9	0.762219	0.914747	ALJ61298.1	Glucosamine-6-phosphate deaminase	EC3.5.99.6
BcellWH2_02463	1.09	4.81	0.29055	0.634931	ALJ59702.1	Putative glycosyltransferase EpsH	EC2.4.1.166	GT2
BcellWH2_04929	-0.52	8.38	0.0645112	0.31933	ALJ62138.1	Polygalacturonase	EC3.2.1.67	GH28
BcellWH2_00121	-1.12	1.89	0.53714	0.804008	ALJ57397.1	hypothetical protein	Unknown
BcellWH2_00453	1.04	3.02	0.510474	0.787914	ALJ57727.1	hypothetical protein	Unknown
BcellWH2_01023	-0.93	5.55	0.214389	0.565046	ALJ58285.1	Signal transduction histidine-protein kinase BarA	EC2.7.13.3
BcellWH2_01482	-1.21	4.63	0.277172	0.62187	ALJ58738.1	Purine nucleoside phosphorylase 1	EC2.4.2.1
BcellWH2_00977	-0.56	7.49	0.088748	0.375539	ALJ58239.1	putative glycosyl transferase	EC2.4.1.-	GT4
BcellWH2_01330	0.73	7.38	0.0962869	0.391743	ALJ58591.1	Sensor histidine kinase TodS	Unknown
BcellWH2_02674	0.6	1.12	0.76943	0.914853	ALJ59913.1	tRNA uridine 5-carboxymethylaminomethyl modification enzyme MnmG	NOT DEFINED
BcellWH2_04415	-0.19	0.75	0.925932	0.972536	ALJ61632.1	hypothetical protein	Unknown
BcellWH2_04658	-0.5	0.87	0.808985	0.930146	ALJ61872.1	hypothetical protein
BcellWH2_01090	-0.22	0.71	0.910621	0.96867	ALJ58352.1	hypothetical protein	Unknown		BcellWH2:7
BcellWH2_02573	-0.4	0.75	0.844658	0.946007	ALJ59812.1	hypothetical protein	Unknown
BcellWH2_04717	1.17	3.56	0.430973	0.738503	ALJ61930.1	hypothetical protein	Unknown
BcellWH2_01327	-0.02	0.28	0.991224	0.996184	ALJ58588.1	Pyruvate-flavodoxin oxidoreductase	EC1.2.7.1:EC1.2.7.-
BcellWH2_05117	0.3	0.89	0.883303	0.95898	ALJ62325.1	MarR family protein	Unknown
BcellWH2_05202	-0.02	0.78	0.990897	0.996184	ALJ62405.1	hypothetical protein	Unknown
BcellWH2_05378	-1.2	4.2	0.356449	0.69363	ALJ62578.1	Glutamine transport ATP-binding protein GlnQ	NOT DEFINED
BcellWH2_04257	1	2.93	0.509312	0.787329	ALJ61474.1	fec operon regulator FecR	Unknown		BcellWH2:86	BcellWH2:101
BcellWH2_05054	1.16	2.75	0.513806	0.789182	ALJ62262.1	Cell division ATP-binding protein FtsE	NOT DEFINED
BcellWH2_03880	0.96	1.71	0.657443	0.870825	ALJ61101.1	hypothetical protein	Unknown
BcellWH2_03963	1.01	5.54	0.21527	0.565083	ALJ61183.1	hypothetical protein	EC2.1.1.72
BcellWH2_01882	-0.69	7.17	0.111053	0.41584	ALJ59133.1	Putative acetyltransferase	EC2.3.1.79
BcellWH2_00841	-0.91	2.2	0.634864	0.859508	ALJ58104.1	hypothetical protein	Unknown
BcellWH2_02092	0.77	1.57	0.695035	0.887915	ALJ59335.1	hypothetical protein	Unknown
BcellWH2_02034	-0.43	8.56	0.0627321	0.313133	ALJ59279.1	Periplasmic beta-glucosidase precursor	EC3.2.1.21	GH3	BcellWH2:28	BcellWH2:32
BcellWH2_01534	-1.11	2.52	0.597361	0.839174	ALJ58788.1	(2E,6E)-farnesyl diphosphate synthase	EC2.5.1.1:EC2.5.1.10:EC2.5.1.29
BcellWH2_03312	-0.45	8.34	0.0655402	0.320747	ALJ60545.1	Glycosyl hydrolases family 2, sugar binding domain	EC3.1.1.53		BcellWH2:70	BcellWH2:79
BcellWH2_03412	-0.2	1.28	0.925428	0.972498	ALJ60641.1	hypothetical protein	Unknown
BcellWH2_03733	0.74	6.24	0.170094	0.507186	ALJ60955.1	hypothetical protein	Unknown
BcellWH2_03550	1.31	3.83	0.456059	0.755909	ALJ60773.1	Sensor protein EvgS precursor	EC2.7.13.3
BcellWH2_00041	1.24	3.24	0.429226	0.738503	ALJ57318.1	hypothetical protein	Unknown
BcellWH2_03365	0.6	1.07	0.773198	0.914853	ALJ60598.1	hypothetical protein
BcellWH2_01429	0.64	7.42	0.0986594	0.395303	ALJ58690.1	MatE	Unknown
BcellWH2_04718	-0.59	1.5	0.77505	0.91504	ALJ61931.1	hypothetical protein	Unknown
BcellWH2_02530	-0.41	0.93	0.842283	0.944992	ALJ59769.1	hypothetical protein	Unknown
BcellWH2_05360	-0.6	7.59	0.0882734	0.373864	ALJ62560.1	Transposase DDE domain protein	NOT DEFINED
BcellWH2_02302	-0.76	6.25	0.157489	0.489134	ALJ59542.1	hypothetical protein	Unknown
BcellWH2_01371	-0.86	6.15	0.167252	0.503983	ALJ58632.1	Regulatory protein SoxS	NOT DEFINED
BcellWH2_01987	-0.76	1.54	0.657747	0.870825	ALJ59232.1	hypothetical protein	Unknown
BcellWH2_00837	1.24	3.11	0.429136	0.738503	ALJ58100.1	hypothetical protein	Unknown
BcellWH2_02367	0.52	7.69	0.0852936	0.370144	ALJ59607.1	Arylsulfatase precursor	EC3.1.6.1		BcellWH2:41
BcellWH2_00579	1.04	2.19	0.568985	0.822328	ALJ57847.1	hemolysin-III related	NOT DEFINED
BcellWH2_04271	0.54	0.88	0.783474	0.917711	ALJ61488.1	N-acetylmuramoyl-L-alanine amidase	EC3.5.1.28
BcellWH2_03243	-0.84	6.71	0.143404	0.469321	ALJ60477.1	Phospholipase/Carboxylesterase	NOT DEFINED		BcellWH2:66	BcellWH2:75
BcellWH2_00429	-0.28	0.62	0.877882	0.956035	ALJ57704.1	ATP-dependent helicase/deoxyribonuclease subunit B	EC3.1.-.-:EC3.6.4.12
BcellWH2_05350	0.46	1.09	0.827233	0.93702	ALJ62552.1	Tetratricopeptide repeat protein	Unknown
BcellWH2_03913	1.18	3.47	0.461013	0.758274	ALJ61134.1	hypothetical protein	Unknown
BcellWH2_02455	0.53	1.42	0.765954	0.914853	ALJ59694.1	hypothetical protein
BcellWH2_01560	-0.43	8.51	0.0638337	0.316636	ALJ58814.1	Photosystem I P700 chlorophyll a apoprotein A2	NOT DEFINED
BcellWH2_05100	-0.12	0.88	0.94695	0.981042	ALJ62308.1	Transposon gamma-delta resolvase	NOT DEFINED
BcellWH2_01469	1.34	3.08	0.492818	0.776944	ALJ58730.1	3-isopropylmalate dehydratase large subunit	EC4.2.1.33:EC4.2.1.35
BcellWH2_02102	-1.22	3.19	0.447018	0.749552	ALJ59345.1	Arginine repressor	NOT DEFINED
BcellWH2_04362	-0.19	1.71	0.931269	0.973557	ALJ61579.1	colanic acid exporter	Unknown
BcellWH2_03697	-0.84	1.52	0.669337	0.876223	ALJ60920.1	hypothetical protein	Unknown
BcellWH2_00246	-0.31	1.11	0.875048	0.955581	ALJ57522.1	hypothetical protein	Unknown
BcellWH2_04364	-0.79	1.84	0.706205	0.892941	ALJ61581.1	UDP-glucose 6-dehydrogenase	EC1.1.1.22
BcellWH2_00824	0.84	1.75	0.673925	0.877659	ALJ58087.1	hypothetical protein	Unknown
BcellWH2_04134	1.15	2.56	0.523976	0.796524	ALJ61354.1	Murein hydrolase activator NlpD precursor	EC3.4.-.-
BcellWH2_00649	-0.15	0.91	0.939146	0.978045	ALJ57916.1	hypothetical protein
BcellWH2_03788	-0.02	0.55	0.992809	0.996373	ALJ61010.1	Helix-turn-helix domain protein	Unknown
BcellWH2_00854	0.19	0.94	0.923204	0.971481	ALJ58117.1	hypothetical protein	Unknown
BcellWH2_01606	-0.69	1.8	0.726055	0.903456	ALJ58859.1	putative glycosyltransferase YkoT	EC2.4.-.-	GT2
BcellWH2_03793	-0.74	2.48	0.689239	0.887236	ALJ61015.1	hypothetical protein
BcellWH2_04877	-0.33	0.92	0.861381	0.951263	ALJ62086.1	hypothetical protein	Unknown
BcellWH2_04116	0.36	1.71	0.865131	0.953303	ALJ61336.1	UDP-3-O-[3-hydroxymyristoyl] N-acetylglucosamine deacetylase	EC3.5.1.108:EC4.2.1.59	CE11
BcellWH2_03714	-1.13	5.08	0.288371	0.633446	ALJ60936.1	hypothetical protein	Unknown		BcellWH2:79	BcellWH2:88
BcellWH2_02520	0.45	8.37	0.0679575	0.327188	ALJ59759.1	SusD family protein	NOT DEFINED		BcellWH2:44	BcellWH2:49
BcellWH2_04632	-0.09	1	0.96355	0.988276	ALJ61846.1	50S ribosomal protein L25	NOT DEFINED
BcellWH2_01619	0.59	7.97	0.0813082	0.359755	ALJ58872.1	Long-chain-fatty-acid--CoA ligase FadD15	EC6.2.1.3
BcellWH2_02512	-1.01	2.22	0.617415	0.850403	ALJ59751.1	Outer membrane protein OprM precursor	NOT DEFINED
BcellWH2_00812	-0.99	2.4	0.641671	0.863533	ALJ58075.1	hypothetical protein	Unknown
BcellWH2_01555	-0.98	2.44	0.582378	0.831319	ALJ58809.1	Putative glycoside hydrolase	Unknown
BcellWH2_04651	1.23	4.54	0.377121	0.711143	ALJ61865.1	heat-inducible protein	NOT DEFINED
BcellWH2_03700	1.03	2.64	0.563279	0.819425	ALJ60923.1	Putative NAD(P)H nitroreductase	Unknown
BcellWH2_03901	-0.49	8.32	0.0691435	0.330553	ALJ61122.1	Phytoene desaturase (lycopene-forming)	EC1.3.99.23
BcellWH2_04184	-1.16	2.73	0.50618	0.785331	ALJ61403.1	hypothetical protein	Unknown
BcellWH2_04396	-1.32	5.19	0.302449	0.647966	ALJ61613.1	hypothetical protein	Unknown
BcellWH2_02776	1.32	3.65	0.459693	0.757967	ALJ60015.1	hypothetical protein	Unknown
BcellWH2_01685	1.23	3.24	0.453815	0.754559	ALJ58938.1	hypothetical protein	Unknown
BcellWH2_04083	0.12	1.05	0.954915	0.984914	ALJ61303.1	Putative bifunctional phosphatase/peptidyl-prolyl cis-trans isomerase	EC5.2.1.8
BcellWH2_00788	-1.28	4.12	0.380829	0.713305	ALJ58051.1	hypothetical protein	Unknown
BcellWH2_01415	0.78	6.59	0.146085	0.47353	ALJ58676.1	Transcription antitermination protein RfaH	NOT DEFINED
BcellWH2_04126	0.2	1.24	0.921572	0.97081	ALJ61346.1	hypothetical protein	Unknown
BcellWH2_04203	0.11	1.01	0.952083	0.983329	ALJ61420.1	Carboxy-terminal processing protease CtpB precursor	EC3.4.21.102
BcellWH2_04954	-1.08	4.72	0.331169	0.672943	ALJ62163.1	Virulence sensor protein BvgS precursor
BcellWH2_00724	0.2	1.5	0.918043	0.970428	ALJ57988.1	heat shock protein GrpE	NOT DEFINED
BcellWH2_00747	-1	6.12	0.241314	0.589456	ALJ58011.1	ADP-ribosylglycohydrolase	Unknown		BcellWH2:3	BcellWH2:3
BcellWH2_03847	0.19	1.63	0.91848	0.970455	ALJ61069.1	hypothetical protein	Unknown
BcellWH2_00414	-1.19	5.12	0.281624	0.62642	ALJ57689.1	hypothetical protein	NOT DEFINED
BcellWH2_03087	-0.18	1.47	0.929617	0.97324	ALJ60324.1	PGL/p-HBAD biosynthesis glycosyltransferase	EC2.4.1.-	GT2
BcellWH2_00531	1.2	3.9	0.45006	0.752979	ALJ57799.1	Undecaprenyl phosphate N,N'-diacetylbacillosamine 1-phosphate transferase	EC2.7.8.36
BcellWH2_03207	-0.6	2.25	0.768933	0.914853	ALJ60443.1	Rhomboid family protein	NOT DEFINED
BcellWH2_01549	-0.7	1.95	0.693007	0.887915	ALJ58803.1	Acetolactate synthase small subunit	EC2.2.1.6
BcellWH2_03353	1.22	2.96	0.43283	0.739845	ALJ60586.1	hypothetical protein	Unknown
BcellWH2_04336	1.03	5.26	0.281857	0.62642	ALJ61553.1	Plasmid maintenance system killer protein	NOT DEFINED
BcellWH2_04706	-1.08	3.09	0.484867	0.769311	ALJ61919.1	ORF6N domain protein	Unknown
BcellWH2_00488	-0.55	7.47	0.092159	0.383149	ALJ57756.1	Poly-beta-1,6-N-acetyl-D-glucosamine synthase	EC2.4.-.-	GT2
BcellWH2_01980	-1.05	4.47	0.369908	0.704112	ALJ59225.1	hypothetical protein	Unknown
BcellWH2_04290	-0.75	2.7	0.645199	0.864651	ALJ61507.1	Diacylglycerol kinase	EC2.7.1.107
BcellWH2_00897	-1	3.34	0.478771	0.767688	ALJ58159.1	Adenylyl-sulfate kinase	EC2.7.1.25
BcellWH2_01132	0.57	1.61	0.758784	0.913554	ALJ58394.1	SsrA-binding protein	NOT DEFINED
BcellWH2_01505	-0.42	8.35	0.0689468	0.329945	ALJ58760.1	Mercuric reductase	NOT DEFINED
BcellWH2_00074	-0.9	2.63	0.65584	0.870496	ALJ57350.1	hypothetical protein
BcellWH2_03860	1.12	2.35	0.53719	0.804008	ALJ61082.1	High-affinity zinc uptake system membrane protein ZnuB	NOT DEFINED
BcellWH2_04621	-0.99	5.78	0.213705	0.564711	ALJ61835.1	hypothetical protein	Unknown
BcellWH2_00646	-0.49	0.95	0.798855	0.925452	ALJ57913.1	hypothetical protein
BcellWH2_00915	-0.58	1.43	0.752796	0.912493	ALJ58177.1	hypothetical protein
BcellWH2_03067	-0.65	1.37	0.713679	0.896723	ALJ60305.1	hypothetical protein
BcellWH2_05538	2.31	5.36	0.29015	0.634803	ALJ62736.1	hypothetical protein	Unknown
BcellWH2_02925	-0.51	1.7	0.817529	0.933963	ALJ60163.1	Gluconate 5-dehydrogenase	EC1.1.1.69
BcellWH2_04993	-1.19	4.43	0.394331	0.714859	ALJ62202.1	2-iminoacetate synthase	EC2.8.1.6
BcellWH2_00040	-1.1	4.96	0.299832	0.645807	ALJ57317.1	hypothetical protein	Unknown
BcellWH2_01924	-0.56	7.8	0.0824756	0.360888	ALJ59170.1	hypothetical protein
BcellWH2_00630	0.75	2.41	0.674191	0.877659	ALJ57898.1	hypothetical protein	NOT DEFINED
BcellWH2_04081	0.11	1.14	0.957988	0.985785	ALJ61301.1	Threonylcarbamoyl-AMP synthase	Unknown
BcellWH2_03358	-1.15	3.88	0.462363	0.759209	ALJ60591.1	hypothetical protein	Unknown
BcellWH2_04763	-0.98	5.42	0.256026	0.601998	ALJ61974.1	hypothetical protein	Unknown
BcellWH2_01384	0.48	1.13	0.806347	0.928911	ALJ58645.1	hypothetical protein	Unknown
BcellWH2_04436	-1.11	3.16	0.545357	0.807654	ALJ61653.1	30S ribosomal protein S1	NOT DEFINED
BcellWH2_01556	-0.26	1.24	0.87461	0.955581	ALJ58810.1	hypothetical protein	Unknown
BcellWH2_03114	0.92	5.47	0.219301	0.569321	ALJ60351.1	bifunctional 3-demethylubiquinone-9 3-methyltransferase/ 2-octaprenyl-6-hydroxy phenol methylase	EC2.1.1.222:EC2.1.1.64
BcellWH2_02475	-0.79	6.32	0.161225	0.496184	ALJ59714.1	Phosphoribosylglycinamide formyltransferase	EC2.1.2.2
BcellWH2_05230	1.17	4.99	0.35872	0.695771	ALJ62432.1	hypothetical protein	Unknown
BcellWH2_03298	-1.21	3.32	0.410319	0.726738	ALJ60532.1	hypothetical protein	Unknown		BcellWH2:69	BcellWH2:78
BcellWH2_03841	0.53	1.43	0.763693	0.914853	ALJ61063.1	hypothetical protein	Unknown
BcellWH2_01143	0.89	3.1	0.567276	0.821654	ALJ58405.1	hypothetical protein	Unknown
BcellWH2_00302	-0.36	2.01	0.843714	0.94582	ALJ57578.1	hypothetical protein	Unknown
BcellWH2_02656	-0.65	6.67	0.137517	0.460199	ALJ59895.1	thiamine biosynthesis lipoprotein ApbE	EC2.7.1.180
BcellWH2_04165	1.05	2.9	0.573497	0.824912	ALJ61385.1	hypothetical protein	Unknown
BcellWH2_00860	0.34	2.26	0.86646	0.953347	ALJ58122.1	hypothetical protein
BcellWH2_00445	0.85	6.17	0.169781	0.507186	ALJ57720.1	hypothetical protein	Unknown
BcellWH2_03158	-0.86	2.76	0.649367	0.867588	ALJ60395.1	hypothetical protein	Unknown
BcellWH2_04131	-0.74	1.7	0.695508	0.887915	ALJ61351.1	Ubiquinone/menaquinone biosynthesis C-methyltransferase UbiE	EC2.1.1.163:EC2.1.1.201
BcellWH2_01131	-1	5.31	0.243622	0.589456	ALJ58393.1	Methionine synthase	EC2.1.1.13
BcellWH2_05096	0.88	3.07	0.603232	0.842198	ALJ62304.1	hypothetical protein	Unknown
BcellWH2_05491	-0.24	1.45	0.905809	0.9675	ALJ62689.1	Acetyltransferase (GNAT) family protein	EC2.3.1.82
BcellWH2_00563	-0.96	2.91	0.611416	0.8477	ALJ57831.1	Positive regulator of sigma(E), RseC/MucC	NOT DEFINED
BcellWH2_05052	-1.11	3.75	0.474122	0.764498	ALJ62260.1	Imidazole glycerol phosphate synthase subunit HisF	EC4.1.3.-
BcellWH2_03095	-0.29	1.85	0.886001	0.960373	ALJ60332.1	hypothetical protein
BcellWH2_04496	-0.64	7.14	0.114069	0.420523	ALJ61712.1	hypothetical protein	Unknown		BcellWH2:89	BcellWH2:106
BcellWH2_00094	1.05	3.13	0.525129	0.797028	ALJ57370.1	Ribose-5-phosphate isomerase A	EC5.3.1.6
BcellWH2_04839	-0.57	7.69	0.0935428	0.385534	ALJ62048.1	hypothetical protein	Unknown		BcellWH2:90	BcellWH2:108
BcellWH2_00986	0.54	1.42	0.778613	0.916843	ALJ58248.1	hypothetical protein
BcellWH2_03606	-0.51	7.6	0.0955206	0.389785	ALJ60829.1	Intracellular exo-alpha-(1->5)-L-arabinofuranosidase	EC3.2.1.55	GH51	BcellWH2:75	BcellWH2:84
BcellWH2_05418	-0.92	5.36	0.242872	0.589456	ALJ62617.1	Queuine tRNA-ribosyltransferase	EC2.4.2.29
BcellWH2_01199	-1.27	3.15	0.509659	0.787609	ALJ58461.1	PTS-dependent dihydroxyacetone kinase, dihydroxyacetone-binding subunit DhaK	EC2.7.1.-
BcellWH2_00378	0.76	6.69	0.145095	0.472606	ALJ57653.1	Acetylxylan esterase precursor	EC3.2.1.8
BcellWH2_05226	-1.11	5.54	0.253024	0.599388	ALJ62428.1	hypothetical protein	EC3.6.4.12
BcellWH2_00434	-0.98	2.88	0.539592	0.805281	ALJ57709.1	hypothetical protein	Unknown
BcellWH2_04420	0.81	5.97	0.181187	0.518988	ALJ61637.1	hypothetical protein	Unknown
BcellWH2_02256	-0.9	5.94	0.196232	0.538082	ALJ59497.1	Sporulation kinase A	EC2.7.13.3
BcellWH2_01799	-1.02	3.54	0.554896	0.815894	ALJ59052.1	hypothetical protein	Unknown
BcellWH2_00017	0.99	5.93	0.211229	0.562016	ALJ57294.1	Phage capsid family protein	Unknown
BcellWH2_05430	0.74	6.64	0.138264	0.462006	ALJ62629.1	Capsular glucan synthase	EC2.4.1.-	GT4
BcellWH2_03006	-0.54	2.66	0.776823	0.916223	ALJ60244.1	Fumarate reductase flavoprotein subunit	EC1.3.5.1:EC1.3.5.4
BcellWH2_03638	-0.44	8.43	0.0663455	0.323027	ALJ60861.1	Beta-galactosidase	EC3.2.1.23	GH2	BcellWH2:76	BcellWH2:85
BcellWH2_02647	-1.12	3.44	0.453025	0.754049	ALJ59886.1	Beta-1,4-mannooligosaccharide phosphorylase	EC3.2.1.197	GH130	BcellWH2:47	BcellWH2:53
BcellWH2_00135	-0.47	2.01	0.794593	0.923091	ALJ57411.1	hypothetical protein	Unknown
BcellWH2_04912	-0.17	1.17	0.921493	0.97081	ALJ62121.1	hypothetical protein	Unknown
BcellWH2_01694	0.54	2.17	0.791731	0.922813	ALJ58947.1	hypothetical protein	Unknown
BcellWH2_05259	0.03	2	0.990899	0.996184	ALJ62461.1	Diaminopimelate epimerase	EC5.1.1.7
BcellWH2_03725	-0.72	2.84	0.71244	0.896073	ALJ60947.1	hypothetical protein	Unknown
BcellWH2_01231	0.85	2.52	0.643422	0.86365	ALJ58493.1	hypothetical protein	Unknown
BcellWH2_05264	-1.2	3.58	0.487296	0.772392	ALJ62466.1	Spermidine/putrescine import ATP-binding protein PotA	EC3.6.3.31
BcellWH2_00992	0.88	2.45	0.64077	0.863078	ALJ58254.1	N-acetylmuramoyl-L-alanine amidase	EC3.5.1.28
BcellWH2_02171	-1.06	3.94	0.422496	0.734614	ALJ59412.1	hypothetical protein
BcellWH2_03106	0.88	5.76	0.223439	0.575858	ALJ60343.1	hypothetical protein	Unknown
BcellWH2_02104	0.21	1.84	0.923109	0.971481	ALJ59347.1	Argininosuccinate synthase	EC6.3.4.5
BcellWH2_00019	-0.34	1.93	0.860077	0.950736	ALJ57296.1	hypothetical protein	Unknown
BcellWH2_05272	-0.71	2.92	0.709412	0.895824	ALJ62474.1	Glutamine--fructose-6-phosphate aminotransferase [isomerizing]	EC2.6.1.16
BcellWH2_02548	0.44	8.52	0.0683505	0.327897	ALJ59787.1	Major fimbrial subunit protein (FimA)	Unknown
BcellWH2_00143	1	4.32	0.416536	0.731417	ALJ57419.1	hypothetical protein	Unknown
BcellWH2_02107	-0.74	3.14	0.647064	0.865179	ALJ59350.1	Acetylornithine/acetyl-lysine aminotransferase	EC2.6.1.11:EC2.6.1.17
BcellWH2_05251	-1.12	4.18	0.393032	0.714859	ALJ62453.1	hypothetical protein
BcellWH2_04647	-0.36	2.18	0.839391	0.944092	ALJ61861.1	hypothetical protein	Unknown
BcellWH2_04380	-1.1	3.99	0.429604	0.738503	ALJ61597.1	Beta-lactamase hydrolase-like protein	EC3.1.2.6
BcellWH2_01073	-1.15	4.07	0.467549	0.762192	ALJ58335.1	Histidinol-phosphate aminotransferase	EC2.6.1.9
BcellWH2_04107	-1.1	3.08	0.514474	0.789388	ALJ61327.1	Methicillin resistance regulatory protein MecI	NOT DEFINED
BcellWH2_05398	0.43	8.82	0.0599642	0.308388	ALJ62598.1	FtsX-like permease family protein	NOT DEFINED
BcellWH2_00086	-0.19	1.3	0.918583	0.970455	ALJ57362.1	ATP synthase epsilon chain	NOT DEFINED
BcellWH2_03888	-0.78	6.26	0.180774	0.518988	ALJ61109.1	hypothetical protein	Unknown
BcellWH2_03717	0.88	5.56	0.241795	0.589456	ALJ60939.1	site-specific tyrosine recombinase XerC	Unknown
BcellWH2_04346	0	1.75	0.999239	0.999563	ALJ61563.1	hypothetical protein
BcellWH2_04935	-0.49	8.57	0.0702033	0.332602	ALJ62144.1	Non-reducing end beta-L-arabinofuranosidase	NOT DEFINED	GH127
BcellWH2_03618	0.31	2.1	0.889866	0.960619	ALJ60841.1	Small-conductance mechanosensitive channel	NOT DEFINED
BcellWH2_03931	0.97	3.56	0.500142	0.781288	ALJ61152.1	hypothetical protein
BcellWH2_00696	-0.25	2.39	0.89047	0.960941	ALJ57960.1	UDP-glucose 4-epimerase	EC5.1.3.2
BcellWH2_05150	0.77	2.44	0.687872	0.886806	ALJ62358.1	Exo-glucosaminidase LytG precursor	NOT DEFINED	GH73-CBM50
BcellWH2_02467	-0.11	2.15	0.954779	0.984914	ALJ59706.1	Hyaluronan synthase	EC2.4.1.175:EC2.4.1.226	GT2
BcellWH2_05468	0.85	3.61	0.603005	0.842198	ALJ62666.1	hypothetical protein	Unknown
BcellWH2_04002	0.85	6.59	0.142169	0.46765	ALJ61222.1	hypothetical protein	Unknown
BcellWH2_03937	0.93	2.72	0.618236	0.850403	ALJ61158.1	Ribosomal silencing factor RsfS	NOT DEFINED
BcellWH2_00762	-0.76	3.17	0.639389	0.861576	ALJ58025.1	hypothetical protein	Unknown
BcellWH2_05240	-0.34	2.43	0.842294	0.944992	ALJ62442.1	Phosphate regulon transcriptional regulatory protein PhoB	NOT DEFINED
BcellWH2_00826	-0.98	4.98	0.318523	0.659242	ALJ58089.1	hypothetical protein	Unknown
BcellWH2_00394	0.87	5.39	0.244203	0.589651	ALJ57669.1	Acyltransferase family protein	Unknown
BcellWH2_00435	-1.02	4.34	0.419694	0.732692	ALJ57710.1	hypothetical protein
BcellWH2_04538	1.02	3.69	0.513105	0.789085	ALJ61754.1	7-carboxy-7-deazaguanine synthase	EC4.3.99.3
BcellWH2_01955	0.78	6.49	0.174354	0.511971	ALJ59201.1	hypothetical protein	Unknown
BcellWH2_04472	0.54	2.13	0.75487	0.913224	ALJ61689.1	4-hydroxythreonine-4-phosphate dehydrogenase	EC1.1.1.262
BcellWH2_00930	-0.22	2.5	0.888138	0.960619	ALJ58192.1	NUDIX domain protein	EC3.6.1.55		BcellWH2:5	BcellWH2:5
BcellWH2_01300	0.58	7.3	0.110634	0.41584	ALJ58561.1	HTH-type transcriptional repressor CytR	NOT DEFINED
BcellWH2_05432	0.6	8.06	0.0809281	0.359134	ALJ62631.1	Putative glycosyltransferase EpsD	EC2.4.1.11	GT4
BcellWH2_04032	1.03	4.41	0.323769	0.665747	ALJ61252.1	hypothetical protein
BcellWH2_02750	1.02	5.29	0.298384	0.643924	ALJ59989.1	hypothetical protein	Unknown
BcellWH2_01152	-0.91	3.23	0.577011	0.827636	ALJ58414.1	hypothetical protein	Unknown
BcellWH2_05053	-0.99	3.9	0.458056	0.757616	ALJ62261.1	Phosphoribosyl-ATP pyrophosphatase	EC3.6.1.31:EC3.5.4.19
BcellWH2_01038	0.85	6.31	0.193926	0.535466	ALJ58300.1	hypothetical protein	Unknown
BcellWH2_02899	-0.07	2.04	0.971494	0.990037	ALJ60138.1	hypothetical protein	Unknown
BcellWH2_01494	0.86	6.28	0.173232	0.510669	ALJ58749.1	hypothetical protein	Unknown
BcellWH2_04805	-0.95	5.76	0.23787	0.589456	ALJ62014.1	Thiol-disulfide oxidoreductase ResA	NOT DEFINED
BcellWH2_04581	-0.69	2.61	0.697555	0.888682	ALJ61796.1	hypothetical protein	EC2.7.1.35
BcellWH2_05353	-0.2	2.61	0.898392	0.964346	ALJ62555.1	photosystem I assembly protein Ycf3	Unknown
BcellWH2_05442	0.94	4.8	0.324047	0.665747	ALJ62641.1	Sporulation related domain protein	Unknown
BcellWH2_04333	0.57	2.36	0.750334	0.912493	ALJ61550.1	UvrB/uvrC motif protein	NOT DEFINED
BcellWH2_02121	0.61	6.96	0.127645	0.444047	ALJ59364.1	hypothetical protein	Unknown		BcellWH2:30
BcellWH2_04681	-0.31	1.97	0.855858	0.949576	ALJ61895.1	putative HTH-type transcriptional regulator YybR	Unknown
BcellWH2_01412	-0.16	2.66	0.926606	0.972536	ALJ58673.1	hypothetical protein	Unknown
BcellWH2_02988	-0.42	8.97	0.0570222	0.300997	ALJ60226.1	Ferric enterobactin receptor precursor	Unknown		BcellWH2:57	BcellWH2:66
BcellWH2_03715	0.48	8.77	0.0612736	0.310088	ALJ60937.1	SusD family protein	NOT DEFINED		BcellWH2:79	BcellWH2:88
BcellWH2_02598	1.07	3.97	0.447921	0.750772	ALJ59837.1	hypothetical protein
BcellWH2_04352	0.56	7.88	0.0873709	0.373264	ALJ61569.1	SusD family protein	NOT DEFINED		BcellWH2:88	BcellWH2:105
BcellWH2_00758	-0.32	2.28	0.867532	0.954152	ALJ58021.1	hypothetical protein
BcellWH2_04925	0.51	7.74	0.0892696	0.375739	ALJ62134.1	Putative DNA-invertase from lambdoid prophage Rac	NOT DEFINED
BcellWH2_01834	-1.03	4.34	0.366298	0.700463	ALJ59087.1	hypothetical protein
BcellWH2_04592	0.15	2.47	0.93904	0.978045	ALJ61807.1	hypothetical protein	Unknown
BcellWH2_01677	0.68	2.48	0.700813	0.890361	ALJ58930.1	hypothetical protein	Unknown		BcellWH2:18	BcellWH2:21
BcellWH2_04759	-0.79	6.13	0.17235	0.509693	ALJ61970.1	Glutamine synthetase	EC6.3.1.2
BcellWH2_01374	-0.82	6.2	0.191585	0.533027	ALJ58635.1	hypothetical protein	Unknown
BcellWH2_05009	1.1	4.41	0.359143	0.696262	ALJ62218.1	Putative NAD(P)H-dependent FMN-containing oxidoreductase YwqN	Unknown
BcellWH2_00713	0.19	2.41	0.920391	0.970665	ALJ57977.1	hypothetical protein	Unknown
BcellWH2_00687	1.13	4.21	0.451932	0.754049	ALJ57951.1	hypothetical protein	Unknown
BcellWH2_04562	-0.96	3.69	0.498712	0.780079	ALJ61777.1	Acetyltransferase (GNAT) family protein	Unknown
BcellWH2_05212	-0.09	3.04	0.963746	0.988276	ALJ62415.1	2-dehydro-3-deoxygluconokinase	EC2.7.1.45
BcellWH2_04653	0.06	2.72	0.97529	0.990924	ALJ61867.1	Quaternary ammonium compound-resistance protein SugE	NOT DEFINED
BcellWH2_04944	-1.08	3.25	0.559077	0.817709	ALJ62153.1	hypothetical protein
BcellWH2_02508	0.24	2.83	0.874167	0.955581	ALJ59747.1	hypothetical protein	Unknown
BcellWH2_05553	-0.06	2.55	0.971115	0.990037	ALJ62751.1	hypothetical protein	Unknown
BcellWH2_03483	-0.43	8.83	0.0619671	0.311606	ALJ60712.1	Ferrienterobactin receptor precursor	Unknown		BcellWH2:73	BcellWH2:82
BcellWH2_04103	0.38	2.59	0.840894	0.944634	ALJ61323.1	hypothetical protein	Unknown
BcellWH2_01958	-0.25	2.47	0.894569	0.962046	ALJ59204.1	hypothetical protein	Unknown
BcellWH2_04123	0.72	3.07	0.66137	0.872039	ALJ61343.1	hypothetical protein	Unknown
BcellWH2_05351	0.87	3.87	0.483509	0.769105	ALJ62553.1	hypothetical protein	Unknown
BcellWH2_01129	-1.04	4.81	0.405925	0.722337	ALJ58391.1	Uridine kinase	EC2.7.1.48
BcellWH2_01413	-0.86	5.63	0.234696	0.587605	ALJ58674.1	hypothetical protein	Unknown
BcellWH2_04529	-0.66	2.42	0.721931	0.900801	ALJ61745.1	hypothetical protein	Unknown
BcellWH2_02041	0.87	3.88	0.529605	0.800217	ALJ59286.1	Trifunctional nucleotide phosphoesterase protein YfkN precursor	EC3.1.3.5
BcellWH2_02219	-0.04	2.82	0.985327	0.99327	ALJ59460.1	Lipoprotein-releasing system ATP-binding protein LolD	EC3.6.3.-
BcellWH2_03751	-0.5	2.6	0.77255	0.914853	ALJ60973.1	hypothetical protein	Unknown
BcellWH2_01618	-0.95	4.12	0.493216	0.776944	ALJ58871.1	Threonylcarbamoyladenosine tRNA methylthiotransferase MtaB	EC2.8.4.5
BcellWH2_03785	-1.03	4.32	0.381494	0.713305	ALJ61007.1	hypothetical protein	Unknown
BcellWH2_02251	-0.13	3.2	0.931821	0.973832	ALJ59492.1	FKBP-type 22 kDa peptidyl-prolyl cis-trans isomerase	EC5.2.1.8
BcellWH2_04349	0.83	5.87	0.204901	0.55158	ALJ61566.1	Glutamine synthetase	EC6.3.1.2
BcellWH2_00969	0.38	3.37	0.873497	0.955581	ALJ58231.1	hypothetical protein	Unknown
BcellWH2_00674	0.84	6.24	0.187116	0.526511	ALJ57941.1	Serine/threonine transporter SstT	NOT DEFINED
BcellWH2_01284	-1.04	4.38	0.383196	0.713305	ALJ58545.1	FMN reductase (NADPH)	Unknown
BcellWH2_00588	-0.75	6.84	0.138823	0.462612	ALJ57856.1	HpaII restriction endonuclease	EC3.1.21.4
BcellWH2_00140	-0.94	4.64	0.455373	0.755391	ALJ57416.1	hypothetical protein	Unknown
BcellWH2_05102	-0.64	6.76	0.148744	0.477869	ALJ62310.1	hypothetical protein	EC3.4.21.96
BcellWH2_04618	0.7	6.47	0.170129	0.507186	ALJ61833.1	hypothetical protein	Unknown
BcellWH2_04996	-1.06	4.71	0.406564	0.723052	ALJ62205.1	hypothetical protein	Unknown
BcellWH2_01509	0.25	3.8	0.882122	0.958725	ALJ58764.1	Outer membrane efflux protein	NOT DEFINED
BcellWH2_01820	-0.58	7.03	0.124847	0.440104	ALJ59073.1	Exodeoxyribonuclease 7 large subunit	EC3.1.11.6
BcellWH2_01521	0.45	3.54	0.754776	0.913224	ALJ58776.1	Cardiolipin synthase	EC2.7.8.-
BcellWH2_01682	-0.8	3.12	0.696767	0.887915	ALJ58935.1	fec operon regulator FecR	Unknown		BcellWH2:18	BcellWH2:22
BcellWH2_01234	-0.97	4.47	0.424	0.735347	ALJ58496.1	hypothetical protein
BcellWH2_03608	-0.43	2.68	0.825457	0.935728	ALJ60831.1	Bifunctional aspartokinase/homoserine dehydrogenase 1	EC2.7.2.4:EC1.1.1.3
BcellWH2_00524	0.85	5.3	0.295638	0.640616	ALJ57792.1	TSCPD domain protein	Unknown
BcellWH2_00335	-0.65	7.09	0.126619	0.443244	ALJ57610.1	Outer membrane efflux protein	NOT DEFINED
BcellWH2_00628	-0.97	4.9	0.395091	0.715501	ALJ57896.1	UDP-2,3-diacetamido-2,3-dideoxy-D-glucuronate 2-epimerase	EC5.1.3.14
BcellWH2_04965	0.28	2.39	0.873408	0.955581	ALJ62174.1	NDP-hexose 2,3-dehydratase	EC4.2.1.159
BcellWH2_03916	-0.92	4.04	0.524311	0.796571	ALJ61137.1	Acyl carrier protein	NOT DEFINED
BcellWH2_01507	0.51	4.44	0.75635	0.913501	ALJ58762.1	Multidrug resistance protein MexA precursor	NOT DEFINED
BcellWH2_02619	-0.59	3.35	0.71122	0.896073	ALJ59858.1	hypothetical protein	EC6.1.1.4
BcellWH2_02495	-0.78	5.4	0.30516	0.649695	ALJ59734.1	Protein of unknown function (Porph_ging)	Unknown
BcellWH2_00625	-0.84	3.02	0.618833	0.850403	ALJ57893.1	ECF RNA polymerase sigma factor SigR	NOT DEFINED
BcellWH2_04532	1.07	5.71	0.254975	0.601012	ALJ61748.1	RNA polymerase sigma factor YlaC	NOT DEFINED
BcellWH2_00785	-1	4.57	0.398672	0.717108	ALJ58048.1	hypothetical protein	Unknown
BcellWH2_03038	0.61	7.13	0.124076	0.43935	ALJ60276.1	hypothetical protein	EC3.2.1.22		BcellWH2:59	BcellWH2:68
BcellWH2_02226	-0.49	3.44	0.76148	0.914747	ALJ59467.1	hypothetical protein	Unknown
BcellWH2_03092	-1.05	4.8	0.413193	0.728304	ALJ60329.1	N,N'-diacetyllegionaminic acid synthase	EC2.5.1.132
BcellWH2_00144	0.77	3.66	0.572948	0.824912	ALJ57420.1	hypothetical protein	Unknown
BcellWH2_00780	-0.29	2.84	0.866139	0.953347	ALJ58043.1	hypothetical protein
BcellWH2_02135	0.53	2.93	0.778325	0.916843	ALJ59378.1	hypothetical protein	Unknown
BcellWH2_01943	0.43	8.84	0.0630735	0.314507	ALJ59189.1	Non-motile and phage-resistance protein	EC2.7.13.3
BcellWH2_03128	0.85	5.17	0.316326	0.657155	ALJ60365.1	hypothetical protein	EC3.1.4.46		BcellWH2:62	BcellWH2:71
BcellWH2_03367	-0.67	6.62	0.157361	0.489063	ALJ60600.1	hypothetical protein	Unknown
BcellWH2_05011	0.98	4.49	0.386758	0.714292	ALJ62220.1	hypothetical protein	Unknown
BcellWH2_00304	0.81	3.61	0.636901	0.860522	ALJ57580.1	hypothetical protein
BcellWH2_04779	0.88	3.76	0.554143	0.815894	ALJ61990.1	Pentapeptide repeats (8 copies)	NOT DEFINED
BcellWH2_00558	-0.68	2.99	0.657813	0.870825	ALJ57826.1	Electron transport complex protein RnfE	NOT DEFINED
BcellWH2_00370	0.43	8.49	0.0742435	0.3442	ALJ57645.1	Mercuric reductase	NOT DEFINED
BcellWH2_00376	0.88	4.31	0.533651	0.801731	ALJ57651.1	hypothetical protein	Unknown
BcellWH2_04815	-0.74	6.17	0.19141	0.533027	ALJ62024.1	Porin subfamily protein	Unknown
BcellWH2_04633	-0.74	3.22	0.654919	0.869809	ALJ61847.1	hypothetical protein	Unknown
BcellWH2_00185	0.71	6.82	0.148932	0.477869	ALJ57461.1	Mannose-1-phosphate guanylyltransferase RfbM	EC2.7.7.13
BcellWH2_00264	0.84	3.87	0.514565	0.789388	ALJ57540.1	hypothetical protein	Unknown
BcellWH2_02109	0.9	3.89	0.474404	0.764498	ALJ59352.1	DNA-binding transcriptional repressor PuuR	EC6.2.1.1
BcellWH2_03904	0.63	2.9	0.672147	0.877243	ALJ61125.1	(3R)-hydroxymyristoyl-ACP dehydratase	EC4.2.1.59
BcellWH2_00933	-0.52	3.43	0.749882	0.912493	ALJ58195.1	Xylulose kinase	EC2.7.1.16		BcellWH2:5	BcellWH2:5
BcellWH2_01136	-0.56	7.78	0.101099	0.400353	ALJ58398.1	Calcineurin-like phosphoesterase	Unknown		BcellWH2:10
BcellWH2_02288	0.37	2.69	0.823147	0.935541	ALJ59528.1	hypothetical protein	Unknown
BcellWH2_02582	0.64	6.93	0.13522	0.456691	ALJ59821.1	hypothetical protein
[truncated: 2,756 more rows]

## Sheet: Table 4a-ii
Supplementary File 4: INSeq analysis of fitness determinants in diet-responsive Bacteroides represented in the defined community as a function of pea fiber, PFABN and SBABN supplementation of the HiSF-LoFV diet (related to Fig. 2).
(a) Summary statistics from linear models of gene fitness during pea fiber supplementation (Experiment 1)
(ii) Bacteroides ovatus ATCC 8483
Locus_Tag	Log2 fold-change (Pea fiber relative to HiSF-LoFV)	Log 2 average counts	P value	Adjusted P value (BH)	Protein accession number	Protein annotation	EC Annotation	CAZy module	Predicted PUL number	Literature PUL number
Bovatus_00211	-2.57	10.03	3.08593e-17	1.20722e-13	ALJ44883.1	Sodium/glucose cotransporter	NOT DEFINED
Bovatus_00212	-2.4	9.68	4.09608e-12	8.01194e-09	ALJ44884.1	Aldose 1-epimerase precursor	EC5.1.3.3
Bovatus_03674	-0.76	12.95	1.47201e-10	1.9195e-07	ALJ48280.1	hypothetical protein	Unknown
Bovatus_00210	-6.92	6.26	1.69257e-09	1.65533e-06	ALJ44882.1	bifunctional nicotinamide mononucleotide adenylyltransferase/ADP-ribose pyrophosphatase	EC3.6.1.55
Bovatus_02956	-1.92	9.64	1.25326e-07	8.17125e-05	ALJ47565.1	Tetratricopeptide repeat protein	Unknown
Bovatus_01646	-1.1	10.46	1.67172e-07	9.34253e-05	ALJ46290.1	hypothetical protein	NOT DEFINED
Bovatus_00805	-7.41	5.9	3.81853e-08	2.98762e-05	ALJ45465.1	Uronate isomerase	EC5.3.1.12
Bovatus_01832	-2.09	8.7	3.56219e-07	0.00014474	ALJ46472.1	Levanase precursor	EC3.2.1.80	GH32	Bovatus:29	Bovatus:97
Bovatus_01172	-1.58	10.31	2.91754e-07	0.000142668	ALJ45823.1	Glycosyl transferases group 1	NOT DEFINED	GT4
Bovatus_00742	-1.61	9.3	3.69989e-07	0.00014474	ALJ45407.1	ATP-dependent Clp protease ATP-binding subunit ClpC	NOT DEFINED
Bovatus_04294	-2.06	9.13	4.8685e-07	0.000173142	ALJ48887.1	hypothetical protein	Unknown
Bovatus_02385	-1.83	8.95	1.36813e-06	0.000382295	ALJ47017.1	Pesticin receptor precursor	NOT DEFINED
Bovatus_01009	1.22	9.42	3.04456e-06	0.000744395	ALJ45660.1	Phosphoribosyl transferase domain protein	EC3.6.4.12
Bovatus_00066	-1.44	9.31	3.56653e-06	0.000820721	ALJ44738.1	hypothetical protein	Unknown
Bovatus_01649	-2.05	7.68	4.65428e-06	0.000934148	ALJ46293.1	hypothetical protein	Unknown
Bovatus_03507	-5.91	5.7	1.06356e-06	0.000320049	ALJ48114.1	hypothetical protein	Unknown
Bovatus_01306	-1.56	9.26	4.60839e-06	0.000934148	ALJ45957.1	glycogen synthase	EC2.4.1.1:EC2.4.1.11	GT3
Bovatus_04191	-1.04	9.93	4.77581e-06	0.000934148	ALJ48785.1	hypothetical protein	Unknown
Bovatus_00908	-3.06	7.33	8.1612e-06	0.00152032	ALJ45565.1	Serine hydroxymethyltransferase	EC2.1.2.1
Bovatus_02628	-0.55	13.37	8.23296e-07	0.000268395	ALJ47253.1	Bacterial Ig-like domain (group 3)	EC3.4.21.96
Bovatus_01693	-1.71	8.77	1.07255e-05	0.00188091	ALJ46334.1	Outer membrane protein (OmpH-like)	NOT DEFINED
Bovatus_01305	-2.69	8.77	1.47571e-05	0.0022732	ALJ45956.1	Maltodextrin phosphorylase	EC2.4.1.1	GT35
Bovatus_00263	-1.99	8.09	2.40607e-05	0.0032457	ALJ44935.1	Sulfate adenylyltransferase subunit 1	EC2.7.7.4
Bovatus_03508	-6.74	3.39	3.03159e-06	0.000744395	ALJ48115.1	Glycosyl transferase family 2	EC2.4.1.60	GT2
Bovatus_00581	1.82	10.13	3.26972e-05	0.00397492	ALJ45247.1	F5/8 type C domain protein	Unknown		Bovatus:12	Bovatus:85
Bovatus_04981	-1.32	9.71	3.35307e-05	0.00397492	ALJ49566.1	NADP-reducing hydrogenase subunit HndC	EC1.6.5.3
Bovatus_01134	-1.11	11.81	1.60688e-05	0.0022732	ALJ45785.1	UDP-N-acetyl-alpha-D-glucosamine C6 dehydratase	NOT DEFINED
Bovatus_04802	-0.85	10.91	2.71564e-05	0.0035412	ALJ49390.1	heat-inducible protein	NOT DEFINED
Bovatus_00266	-0.63	12.3	1.10585e-05	0.00188091	ALJ44938.1	Outer membrane protein 41 precursor	NOT DEFINED
Bovatus_01030	-0.55	12	1.50502e-05	0.0022732	ALJ45681.1	hypothetical protein	Unknown
Bovatus_00264	-2.58	7.84	7.46303e-05	0.00768299	ALJ44936.1	Sulfotransferase domain protein	Unknown
Bovatus_00515	1.19	9.19	6.05033e-05	0.00657469	ALJ45182.1	HpaII restriction endonuclease	EC3.1.21.4
Bovatus_03413	6.04	5.07	1.53784e-05	0.0022732	ALJ48020.1	SusD family protein	NOT DEFINED		Bovatus:69	Bovatus:17
Bovatus_01176	-0.95	10.47	5.0502e-05	0.0058107	ALJ45827.1	hypothetical protein	Unknown
Bovatus_04189	-1.57	8.36	9.17845e-05	0.00875759	ALJ48783.1	Receptor L domain protein	Unknown
Bovatus_04952	-1.8	7.83	0.000115721	0.00963193	ALJ49539.1	NigD-like protein	Unknown
Bovatus_01407	0.79	11.84	3.27259e-05	0.00397492	ALJ46053.1	Ferritin	EC1.16.3.2
Bovatus_01793	1.48	9.84	8.55358e-05	0.0083654	ALJ46433.1	Sensor histidine kinase TmoS	Unknown
Bovatus_03808	6.46	5.31	1.62704e-05	0.0022732	ALJ48413.1	Retaining alpha-galactosidase precursor	EC3.2.1.3	GH97	Bovatus:83	Bovatus:76
Bovatus_03509	-3.68	7.19	0.000111397	0.00963193	ALJ48116.1	Putative glycosyltransferase EpsH	EC2.4.1.166	GT2
Bovatus_04092	-5.02	6.25	8.53303e-05	0.0083654	ALJ48687.1	Bifunctional oligoribonuclease and PAP phosphatase NrnA	EC3.1.3.7:EC3.1.13.3
Bovatus_02228	-1.19	9.06	0.000157278	0.0125565	ALJ46861.1	hypothetical protein	Unknown
Bovatus_04268	2.02	7.76	0.000219637	0.0168475	ALJ48862.1	Susd and RagB outer membrane lipoprotein	Unknown		Bovatus:94	Bovatus:98
Bovatus_03534	0.77	10.75	9.45458e-05	0.00880627	ALJ48141.1	hypothetical protein	Unknown
Bovatus_01094	-4.93	5.41	0.000107626	0.00956896	ALJ45745.1	Electron transport complex protein RnfD	NOT DEFINED
Bovatus_04536	-5.26	4.93	9.93756e-05	0.00904087	ALJ49127.1	hypothetical protein	EC2.4.1.25	GH133
Bovatus_00356	-1.2	8.74	0.000208657	0.0163253	ALJ45025.1	6-phosphogluconate dehydrogenase, decarboxylating	EC1.1.1.44:EC1.1.1.343
Bovatus_04538	-2.19	7.82	0.000293601	0.0198023	ALJ49129.1	Glycosyl hydrolase family 57	EC3.2.1.1	GH57
Bovatus_04747	-2.07	7.56	0.000296071	0.0198023	ALJ49336.1	Anaphase-promoting complex, cyclosome, subunit 3	Unknown
Bovatus_03830	-1.13	8.71	0.000273376	0.0192035	ALJ48435.1	Chaperone protein Skp precursor	NOT DEFINED
Bovatus_01565	1	8.98	0.000274897	0.0192035	ALJ46209.1	hypothetical protein	Unknown
Bovatus_04679	2.1	6.79	0.000373663	0.0228683	ALJ49269.1	hypothetical protein	NOT DEFINED
Bovatus_00302	1.6	7.63	0.000374124	0.0228683	ALJ44973.1	hypothetical protein	Unknown		Bovatus:9	Bovatus:34
Bovatus_01177	-1.04	10.97	0.000151371	0.0123367	ALJ45828.1	hypothetical protein	Unknown
Bovatus_02335	-3.03	6.58	0.000370837	0.0228683	ALJ46968.1	hypothetical protein	Unknown
Bovatus_02382	-6.65	4.73	7.28503e-05	0.00768299	ALJ47014.1	hypothetical protein	NOT DEFINED
Bovatus_01179	-1.07	10.34	0.000232663	0.0175035	ALJ45830.1	Putative acetyltransferase EpsM	EC2.3.1.-
Bovatus_03470	-1.68	8.11	0.000481394	0.0281077	ALJ48077.1	fec operon regulator FecR	Unknown		Bovatus:73
Bovatus_02305	1.68	7.82	0.000527422	0.0299025	ALJ46938.1	DNA-damage-inducible protein F	NOT DEFINED
Bovatus_01607	7.54	4.02	0.000114843	0.00963193	ALJ46251.1	Phosphatidylglycerophosphatase A	EC3.1.3.27
Bovatus_04733	-8.74	2.21	5.53561e-05	0.00618723	ALJ49322.1	Type I restriction modification DNA specificity domain protein	EC3.1.21.3
Bovatus_03506	-4.52	4.63	0.000266409	0.0192035	ALJ48113.1	Putative glycosyltransferase EpsH	EC2.4.-.-	GT2
Bovatus_02165	2.09	6.94	0.00071271	0.0371749	ALJ46799.1	Glycosyl hydrolase family 76	Unknown	GH76	Bovatus:36	Bovatus:67
Bovatus_04486	-1.86	7.24	0.000709071	0.0371749	ALJ49079.1	Plasmid pRiA4b ORF-3-like protein	Unknown
Bovatus_00655	1.58	7.79	0.000763075	0.0392783	ALJ45321.1	Signal transduction histidine-protein kinase BarA	EC2.7.13.3		Bovatus:14
Bovatus_00358	-1.36	7.81	0.000779182	0.0394314	ALJ45027.1	6-phosphogluconolactonase	EC3.1.1.31
Bovatus_00065	-0.71	10.98	0.000298655	0.0198023	ALJ44737.1	hypothetical protein	Unknown
Bovatus_03316	-4.97	5.24	0.000520736	0.0299025	ALJ47923.1	Gluconate 5-dehydrogenase	EC1.1.1.69
Bovatus_01180	-0.88	10.16	0.00048035	0.0281077	ALJ45831.1	TDP-4-oxo-6-deoxy-alpha-D-glucose-3, 4-oxoisomerase	EC5.3.2.3
Bovatus_01536	2.15	6.94	0.00109363	0.0497476	ALJ46180.1	Thermostable beta-glucosidase B	EC3.2.1.21	GH3	Bovatus:21	Bovatus:88
Bovatus_01181	-1.07	9.97	0.000598792	0.0329926	ALJ45832.1	TDP-4-oxo-6-deoxy-alpha-D-glucose-3, 4-oxoisomerase	EC5.3.2.3
Bovatus_00260	-1.37	8.44	0.00093555	0.0451836	ALJ44932.1	Sodium-dependent dicarboxylate transporter SdcS	Unknown
Bovatus_03510	-2.7	6.37	0.00118201	0.052543	ALJ48117.1	putative glycosyltransferase EpsJ	EC2.4.-.-	GT2
Bovatus_01556	-1.79	7.01	0.0012674	0.0538922	ALJ46200.1	Poly-beta-1,6-N-acetyl-D-glucosamine synthase	EC2.4.1.-	GT2
Bovatus_02334	-1.53	7.43	0.00126209	0.0538922	ALJ46967.1	Ribosomal RNA small subunit methyltransferase I	EC2.1.1.198
Bovatus_01182	-1.01	11.41	0.000351404	0.0228683	ALJ45833.1	dTDP-glucose 4,6-dehydratase	EC4.2.1.46
Bovatus_01175	-1.09	10.41	0.000619327	0.0336501	ALJ45826.1	D-inositol-3-phosphate glycosyltransferase	EC2.4.1.290	GT4
Bovatus_00803	-4.09	5.73	0.000981323	0.0468163	ALJ45463.1	Altronate oxidoreductase	EC1.1.1.58
Bovatus_03880	-0.52	11.79	0.000274354	0.0192035	ALJ48483.1	fec operon regulator FecR	Unknown		Bovatus:87	Bovatus:80
Bovatus_01415	-5.94	3.56	0.000445315	0.0268011	ALJ46061.1	Formyltetrahydrofolate deformylase	EC3.5.1.10
Bovatus_03926	-1.87	6.52	0.00157401	0.0626844	ALJ48528.1	hypothetical protein	Unknown		Bovatus:90	Bovatus:83
Bovatus_02732	-1.28	8.19	0.00137151	0.057078	ALJ47350.1	Sensor histidine kinase TmoS	Unknown		Bovatus:48	Bovatus:19
Bovatus_02700	-3.87	7.53	0.00141461	0.0576452	ALJ47325.1	Transcription elongation factor GreA	NOT DEFINED
Bovatus_01171	-1.31	9.06	0.00119538	0.052543	ALJ45822.1	UDP-glucose 4-epimerase	EC5.1.3.26
Bovatus_01184	-0.92	11.89	0.000363718	0.0228683	ALJ45835.1	putative undecaprenyl-phosphate N-acetylglucosaminyl 1-phosphate transferase	EC2.7.8.33:EC2.7.8.35
Bovatus_03457	-1.31	8.9	0.0012607	0.0538922	ALJ48064.1	Efflux pump membrane transporter BepE	NOT DEFINED
Bovatus_04001	1.26	8	0.00176282	0.0689615	ALJ48596.1	translation initiation factor Sui1	NOT DEFINED
Bovatus_02973	0.74	10.78	0.000695812	0.0371749	ALJ47582.1	hypothetical protein	Unknown
Bovatus_04011	-1.56	8.46	0.00158634	0.0626844	ALJ48606.1	Branched-chain-amino-acid aminotransferase	EC2.6.1.42
Bovatus_00771	-2.06	6.98	0.00221964	0.081627	ALJ45433.1	hypothetical protein	Unknown
Bovatus_02392	7.24	2.87	0.00057118	0.0319208	ALJ47024.1	hypothetical protein	Unknown
Bovatus_01173	-0.94	10.75	0.000798019	0.0395171	ALJ45824.1	dTDP-3-amino-3,6-dideoxy-alpha-D-galactopyranose transaminase	EC2.6.1.90
Bovatus_01074	-0.68	10.53	0.000841369	0.0411429	ALJ45725.1	Elongation factor 4	NOT DEFINED
Bovatus_01455	0.81	9.58	0.00128715	0.0541434	ALJ46099.1	Cytochrome c-type protein NrfH	NOT DEFINED
Bovatus_03398	3.75	8.11	0.00255999	0.0866321	ALJ48005.1	Outer membrane protein assembly factor BamB	EC3.4.24.-		Bovatus:68	Bovatus:16
Bovatus_00813	1.2	8.27	0.00233713	0.0833193	ALJ45471.1	DoxX	NOT DEFINED
Bovatus_01174	-1.17	8.68	0.0021535	0.081627	ALJ45825.1	dTDP-3-amino-3,6-dideoxy-alpha-D-galactopyranose 3-N-acetyltransferase	EC2.3.1.197
Bovatus_04743	6.3	3.78	0.00108225	0.0497476	ALJ49332.1	NmrA-like family protein	NOT DEFINED
Bovatus_01381	-0.94	9.83	0.00140799	0.0576452	ALJ46027.1	Glycosyltransferase family 10 (fucosyltransferase)	EC2.4.1.65:EC2.4.1.152	GT
Bovatus_03359	-4.62	4.72	0.00218226	0.081627	ALJ47966.1	tRNA uridine 5-carboxymethylaminomethyl modification enzyme MnmG	NOT DEFINED
Bovatus_04314	2.14	7	0.00314243	0.0991384	ALJ48907.1	NADH-quinone oxidoreductase subunit N	EC1.6.5.3
Bovatus_04190	-1.65	7.52	0.00293539	0.0949893	ALJ48784.1	PKD domain protein	Unknown
Bovatus_03532	-2.51	6.42	0.00336474	0.105303	ALJ48139.1	Acetylglutamate kinase	EC2.7.2.8
Bovatus_01183	-0.97	10.6	0.00119516	0.052543	ALJ45834.1	Glucose-1-phosphate thymidylyltransferase 1	EC2.7.7.24
Bovatus_00688	-1.82	7.02	0.00350476	0.106284	ALJ45354.1	hypothetical protein	Unknown
Bovatus_02122	-6.53	2.51	0.000994978	0.0468958	ALJ46756.1	Acetolactate synthase isozyme 2 large subunit	EC2.2.1.6
Bovatus_04371	-5.77	4.05	0.00154178	0.06218	ALJ48964.1	hypothetical protein	EC4.2.2.2	PL1_2	Bovatus:96	Bovatus:100
Bovatus_02369	4.12	5.51	0.00219854	0.081627	ALJ47001.1	Virginiamycin A acetyltransferase	EC2.3.1.-
Bovatus_01566	-2.15	6.27	0.00384831	0.112427	ALJ46210.1	hypothetical protein	Unknown
Bovatus_01814	-3.21	6.17	0.00342281	0.105433	ALJ46454.1	hypothetical protein	NOT DEFINED
Bovatus_00518	1.37	8.43	0.00298663	0.0949893	ALJ45185.1	putative metallo-hydrolase	Unknown
Bovatus_00357	-0.96	8.98	0.00252818	0.0866321	ALJ45026.1	Glucose-6-phosphate 1-dehydrogenase	EC1.1.1.49:EC1.1.1.363
Bovatus_03090	-2.5	6.12	0.00413382	0.119311	ALJ47698.1	hypothetical protein	Unknown
Bovatus_04852	-0.86	9.11	0.00255431	0.0866321	ALJ49440.1	hypothetical protein	Unknown
Bovatus_02217	-1.69	6.56	0.00459437	0.125544	ALJ46850.1	4-alpha-glucanotransferase	EC2.4.1.25	CBM20-CBM20-GH77
Bovatus_01660	1.79	7.35	0.00448713	0.123617	ALJ46304.1	Quercetin 2,3-dioxygenase	NOT DEFINED
Bovatus_02333	-0.98	8.82	0.0028255	0.0928854	ALJ46966.1	Chromosome partition protein Smc	Unknown
Bovatus_02095	1.04	9.51	0.00254854	0.0866321	ALJ46729.1	hypothetical protein	Unknown
Bovatus_03531	-1.33	7.64	0.00414782	0.119311	ALJ48138.1	Biosynthetic arginine decarboxylase	EC4.1.1.19
Bovatus_01524	-1.1	8.15	0.00349566	0.106284	ALJ46168.1	hypothetical protein	EC3.1.21.3
Bovatus_01412	-5.34	3.31	0.00225455	0.0816649	ALJ46058.1	Imidazole glycerol phosphate synthase subunit HisF	EC4.1.3.-
Bovatus_00026	-1.8	6.54	0.00496423	0.131217	ALJ44698.1	transcriptional activator FtrA	Unknown		Bovatus:2	Bovatus:26
Bovatus_02860	4.98	4.85	0.00261517	0.0874405	ALJ47472.1	Outer membrane protein TolC precursor	NOT DEFINED
Bovatus_02067	0.79	9.64	0.00234282	0.0833193	ALJ46702.1	Cobalt-zinc-cadmium resistance protein CzcA	NOT DEFINED
Bovatus_00510	-1.85	7.89	0.00436297	0.122791	ALJ45177.1	Phosphoserine aminotransferase	EC2.6.1.52
Bovatus_00558	-4.49	4.87	0.00295038	0.0949893	ALJ45224.1	hypothetical protein	Unknown
Bovatus_04722	5.59	4.65	0.00272611	0.0903774	ALJ49311.1	Extended-spectrum beta-lactamase PER-1 precursor	EC3.5.2.6
Bovatus_03613	1.69	7.04	0.00519892	0.134146	ALJ48219.1	SusD family protein	NOT DEFINED		Bovatus:75	Bovatus:35
Bovatus_04868	-1.67	7.21	0.00531508	0.134146	ALJ49456.1	Heparin-sulfate lyase precursor	EC4.2.2.8	PL12_2	Bovatus:104	Bovatus:107
Bovatus_01208	2.91	6.29	0.00525841	0.134146	ALJ45859.1	Guanosine-5'-triphosphate,3'-diphosphate pyrophosphatase	EC3.6.1.11:EC3.6.1.40
Bovatus_01119	4.49	4.88	0.00370358	0.110598	ALJ45770.1	Glycosyltransferase family 6	EC2.4.1.309	GT6
Bovatus_02436	1.25	7.86	0.00465334	0.125544	ALJ47062.1	Ferrienterobactin receptor precursor	NOT DEFINED		Bovatus:42	Bovatus:60
Bovatus_03646	-0.46	11.52	0.00106609	0.0496493	ALJ48252.1	fec operon regulator FecR	Unknown		Bovatus:78	Bovatus:70
Bovatus_00680	1.36	7.7	0.00502786	0.132007	ALJ45346.1	Sensor histidine kinase TmoS	Unknown
Bovatus_00404	3.92	5.2	0.00425867	0.120724	ALJ45072.1	hypothetical protein	Unknown
Bovatus_01162	-6.58	2.5	0.00211649	0.0811736	ALJ45813.1	Inner membrane transport permease YbhR	NOT DEFINED
Bovatus_03138	1.77	6.88	0.00602643	0.147346	ALJ47746.1	hypothetical protein	NOT DEFINED		Bovatus:57	Bovatus:50
Bovatus_01937	6.17	2.66	0.0023982	0.0845205	ALJ46572.1	Thioredoxin-like protein	NOT DEFINED
Bovatus_03724	0.69	10.71	0.00193848	0.0750823	ALJ48329.1	TonB dependent receptor	Unknown		Bovatus:81	Bovatus:73
Bovatus_04065	3.52	5.85	0.00516348	0.134146	ALJ48660.1	Phytoene desaturase (lycopene-forming)	EC1.3.99.23
Bovatus_02921	-1.05	8.67	0.00382823	0.112427	ALJ47530.1	2-oxoglutarate oxidoreductase subunit KorA	EC1.2.7.3:EC1.2.7.11
Bovatus_02544	3.98	8.05	0.0062419	0.148892	ALJ47169.1	Beta-galactosidase	EC3.2.1.23	GH2	Bovatus:46	Bovatus:4
Bovatus_01197	-6.98	2.02	0.00223264	0.081627	ALJ45848.1	Asparagine synthetase B	EC6.3.5.4
Bovatus_03209	5.26	5	0.00470183	0.125983	ALJ47817.1	hypothetical protein	Unknown		Bovatus:61
Bovatus_03875	-1.82	6.65	0.00690958	0.157153	ALJ48478.1	Argininosuccinate synthase	EC6.3.4.5
Bovatus_00546	-0.6	10.16	0.00256885	0.0866321	ALJ45212.1	sulfate adenylyltransferase subunit 2	Unknown
Bovatus_03694	-1.13	7.46	0.00616465	0.148865	ALJ48299.1	Thiamine biosynthesis lipoprotein ApbE precursor	EC2.7.1.180		Bovatus:80	Bovatus:72
Bovatus_02571	-4.29	4.25	0.00496209	0.131217	ALJ47196.1	Glycosyl hydrolases family 2, sugar binding domain	EC3.2.1.23
Bovatus_01510	1.18	8.12	0.00530422	0.134146	ALJ46154.1	ECF RNA polymerase sigma factor SigL	NOT DEFINED		Bovatus:20	Bovatus:87
Bovatus_00307	-4.12	4.59	0.00556451	0.137774	ALJ44978.1	SusD family protein	NOT DEFINED		Bovatus:9	Bovatus:34
Bovatus_02939	3.46	5.95	0.00682802	0.156206	ALJ47548.1	hypothetical protein	Unknown		Bovatus:52	Bovatus:43
Bovatus_03645	1.31	7.59	0.00696014	0.157388	ALJ48251.1	RNA polymerase sigma factor SigM	NOT DEFINED		Bovatus:78	Bovatus:70
Bovatus_00265	-1.9	7.15	0.00747918	0.161467	ALJ44937.1	Putative glycoside hydrolase	Unknown
Bovatus_02899	5.97	3.72	0.00424925	0.120724	ALJ47509.1	hypothetical protein	Unknown		Bovatus:51	Bovatus:41
Bovatus_01161	3.3	5.79	0.0076653	0.162191	ALJ45812.1	Acid shock protein	NOT DEFINED
Bovatus_00474	-0.55	12.5	0.000786209	0.0394314	ALJ45141.1	hypothetical protein	Unknown
Bovatus_01169	5.52	4.19	0.00439733	0.122874	ALJ45820.1	Tyrosine-protein kinase ptk	EC2.7.10.-
Bovatus_04777	4	5.03	0.0070506	0.158126	ALJ49365.1	HIT domain protein	NOT DEFINED
Bovatus_01528	0.75	9.67	0.00385102	0.112427	ALJ46172.1	EcoKI restriction-modification system protein HsdS	EC3.1.21.3
Bovatus_00350	1.98	6.64	0.00883231	0.172605	ALJ45019.1	N-acetylglutamate synthase	EC2.3.1.128
Bovatus_01283	4.32	4.63	0.00707364	0.158126	ALJ45934.1	Rhamnulokinase	EC2.7.1.5
Bovatus_02573	4.69	4.76	0.00536747	0.1346	ALJ47198.1	Arabinoxylan arabinofuranohydrolase precursor		GH43_29-CBM6
Bovatus_04347	1.18	7.6	0.00719021	0.158969	ALJ48940.1	Trk system potassium uptake protein TrkA	NOT DEFINED
Bovatus_03390	1.14	7.63	0.00773787	0.162191	ALJ47997.1	Ribokinase	EC2.7.1.4
Bovatus_04413	-2.03	6.07	0.00948957	0.176777	ALJ49006.1	SusD family protein	NOT DEFINED		Bovatus:97	Bovatus:101
Bovatus_01292	6.15	1.37	0.00366372	0.11025	ALJ45943.1	hypothetical protein	Unknown		Bovatus:16	Bovatus:84
Bovatus_02858	-1.72	6.64	0.00899848	0.172605	ALJ47470.1	hypothetical protein	NOT DEFINED
Bovatus_00285	-3.79	5.25	0.00805627	0.165874	ALJ44956.1	N-acetylglucosamine repressor	NOT DEFINED
Bovatus_04866	-1.22	7.95	0.00719263	0.158969	ALJ49454.1	TonB dependent receptor	NOT DEFINED		Bovatus:104	Bovatus:107
Bovatus_00797	-0.58	10.36	0.00296349	0.0949893	ALJ45457.1	DEAD-box ATP-dependent RNA helicase CshA	EC3.6.4.13
Bovatus_03405	1.63	6.85	0.00980192	0.178349	ALJ48012.1	transcriptional activator FtrA	NOT DEFINED
Bovatus_00097	-3.64	5.27	0.00879941	0.172605	ALJ44769.1	Histidinol-phosphate aminotransferase	EC2.6.1.9
Bovatus_03775	-4.91	3.97	0.00646295	0.150494	ALJ48380.1	Extracellular exo-alpha-L-arabinofuranosidase precursor	EC3.2.1.55	GH51
Bovatus_01097	-3.86	5.24	0.00933563	0.175582	ALJ45748.1	Positive regulator of sigma(E), RseC/MucC	NOT DEFINED
Bovatus_01012	3.86	5.19	0.00862266	0.172605	ALJ45663.1	hypothetical protein	Unknown
Bovatus_03905	0.89	9.03	0.00560884	0.137999	ALJ48507.1	Ribosomal large subunit pseudouridine synthase D	EC5.4.99.23
Bovatus_00298	3.48	5.03	0.00880173	0.172605	ALJ44969.1	hypothetical protein	Unknown		Bovatus:9	Bovatus:34
Bovatus_00225	-1.29	7.36	0.00865961	0.172605	ALJ44897.1	hypothetical protein	Unknown
Bovatus_04376	-2.11	5.97	0.0110363	0.18936	ALJ48969.1	SusD family protein	NOT DEFINED		Bovatus:96	Bovatus:100
Bovatus_00051	0.9	8.71	0.00656444	0.151953	ALJ44723.1	hypothetical protein	Unknown
Bovatus_02277	1.29	7.73	0.00894567	0.172605	ALJ46910.1	RDD family protein	Unknown
Bovatus_02239	-3.68	4.34	0.00908909	0.172605	ALJ46872.1	Elongation factor G	NOT DEFINED
Bovatus_04424	-2.06	6.29	0.0108694	0.187317	ALJ49017.1	Sensor histidine kinase TmoS	Unknown		Bovatus:97	Bovatus:101
Bovatus_01489	5.25	2.12	0.00621608	0.148892	ALJ46133.1	Malonyl-[acyl-carrier protein] O-methyltransferase	EC2.1.1.197
Bovatus_02115	-1.04	7.56	0.00862844	0.172605	ALJ46749.1	Isocitrate dehydrogenase [NADP]	EC1.1.1.42
Bovatus_02123	-3.56	4.91	0.0097371	0.177998	ALJ46757.1	Dihydroxy-acid dehydratase	EC4.2.1.9
Bovatus_01713	0.86	9.39	0.00554541	0.137774	ALJ46354.1	Fructose-bisphosphate aldolase class 1
Bovatus_01043	5.87	1.85	0.00611182	0.148506	ALJ45694.1	AAA-like domain protein	NOT DEFINED
Bovatus_03822	-5.67	1.16	0.0052645	0.134146	ALJ48427.1	Gamma-glutamyl phosphate reductase	EC1.2.1.41
Bovatus_00640	3.15	6.08	0.0112002	0.189677	ALJ45306.1	Bacterial alpha-L-rhamnosidase	EC3.2.1.40	GH78
Bovatus_00861	4.96	3.56	0.00732097	0.160897	ALJ45518.1	hypothetical protein	Unknown
Bovatus_01384	-1.47	7.73	0.00908017	0.172605	ALJ46030.1	Long-chain-fatty-acid--CoA ligase	EC6.2.1.3
Bovatus_02644	-1.88	6.19	0.0121588	0.195741	ALJ47269.1	Macrolide export ATP-binding/permease protein MacB	NOT DEFINED
Bovatus_01617	-2.79	6.15	0.0117976	0.19556	ALJ46261.1	Macrolide export ATP-binding/permease protein MacB	NOT DEFINED
Bovatus_02966	-2.76	6.46	0.0119382	0.195591	ALJ47575.1	hypothetical protein	Unknown
Bovatus_02354	5.27	4.12	0.007753	0.162191	ALJ46986.1	hypothetical protein	Unknown
Bovatus_02162	-4.02	5	0.00957348	0.177495	ALJ46796.1	Cyclic nucleotide-binding domain protein	Unknown
Bovatus_04408	-1.41	7.07	0.0117121	0.194969	ALJ49001.1	Phage integrase family protein	Unknown		Bovatus:97	Bovatus:101
Bovatus_03463	1.87	6.7	0.0126968	0.201093	ALJ48070.1	SusD family protein	NOT DEFINED		Bovatus:72	Bovatus:38
Bovatus_04471	3.51	5.42	0.0111197	0.189677	ALJ49064.1	hypothetical protein	Unknown
Bovatus_04556	2.08	6.4	0.0131128	0.204372	ALJ49147.1	TonB-dependent Receptor Plug Domain protein	Unknown
Bovatus_03874	-2.2	6.08	0.0132616	0.205017	ALJ48477.1	N-acetyl-gamma-glutamyl-phosphate reductase	EC1.2.1.38
Bovatus_04994	4.3	4.95	0.0100557	0.17915	ALJ49579.1	TonB-dependent Receptor Plug Domain protein	Unknown		Bovatus:109	Bovatus:112
Bovatus_03031	-0.71	9.95	0.00465128	0.125544	ALJ47640.1	FKBP-type 22 kDa peptidyl-prolyl cis-trans isomerase	EC5.2.1.8
Bovatus_03884	5.19	2.3	0.00847142	0.172605	ALJ48487.1	hypothetical protein	Unknown		Bovatus:87	Bovatus:80
Bovatus_01408	-4.03	0.18	0.00681005	0.156206	ALJ46054.1	Diaminopimelate decarboxylase	EC4.1.1.20
Bovatus_02557	6.09	2.84	0.0076865	0.162191	ALJ47182.1	hypothetical protein	Unknown
Bovatus_01257	1.03	7.79	0.0102204	0.180915	ALJ45908.1	Aerobic cobaltochelatase subunit CobN	EC6.6.1.2
Bovatus_00069	-4.01	4.97	0.013019	0.203722	ALJ44741.1	NigD-like protein	Unknown
Bovatus_01263	-1.37	7.18	0.0118938	0.195591	ALJ45914.1	Catabolite control protein A	NOT DEFINED
Bovatus_04651	1.23	7.55	0.0121372	0.195741	ALJ49241.1	hypothetical protein	Unknown
Bovatus_04443	1.69	6.99	0.0130038	0.203722	ALJ49036.1	Polygalacturonase	EC3.2.1.40	GH28	Bovatus:99	Bovatus:102
Bovatus_03528	0.75	8.92	0.00743518	0.161467	ALJ48135.1	Putative beta-lactamase HcpC precursor	NOT DEFINED
Bovatus_03075	4.57	4.87	0.0114601	0.192411	ALJ47683.1	Periplasmic beta-glucosidase precursor	EC3.2.1.21	GH3	Bovatus:55	Bovatus:47
Bovatus_01699	1.42	7.11	0.0136735	0.207329	ALJ46340.1	Beta-galactosidase	EC3.2.1.23	GH2	Bovatus:24	Bovatus:91
Bovatus_02914	-0.76	8.62	0.00896673	0.172605	ALJ47524.1	DNA-binding protein HU-beta	NOT DEFINED
Bovatus_03410	-4.13	4.59	0.0113459	0.191315	ALJ48017.1	hypothetical protein	NOT DEFINED		Bovatus:69	Bovatus:17
Bovatus_03282	5.18	1.3	0.00885334	0.172605	ALJ47890.1	N-acetylmuramoyl-L-alanine amidase	EC3.5.1.28
Bovatus_00837	-5.36	1.21	0.00789586	0.164117	ALJ45495.1	Transcriptional regulatory protein YpdB	NOT DEFINED
Bovatus_02486	5.47	3.67	0.0100318	0.17915	ALJ47111.1	hypothetical protein	Unknown
Bovatus_00087	4.87	1.02	0.00852416	0.172605	ALJ44759.1	fructoselysine 3-epimerase	EC3.2.1.52		Bovatus:4	Bovatus:24
Bovatus_00612	0.95	8.05	0.0103406	0.182218	ALJ45278.1	ski2-like helicase	EC3.6.4.-
Bovatus_03750	1.13	7.41	0.012553	0.200439	ALJ48355.1	UDP-Glcalpha-D-GlcNAc-diphosphoundecaprenol beta-1,3-glucosyltransferase WfgD	EC2.4.1.-	GT2
Bovatus_02435	3.38	5.46	0.0145171	0.215014	ALJ47061.1	SusD family protein	NOT DEFINED		Bovatus:42	Bovatus:60
Bovatus_03023	-3.93	4.25	0.0133233	0.205017	ALJ47632.1	D-inositol 3-phosphate glycosyltransferase	EC2.4.1.-	GT4
Bovatus_03780	5.1	4.15	0.0121368	0.195741	ALJ48385.1	hypothetical protein	Unknown
Bovatus_04750	0.96	7.88	0.0116457	0.194692	ALJ49339.1	Swarming motility protein SwrC	NOT DEFINED
Bovatus_02917	0.73	9.34	0.00751199	0.161467	ALJ47527.1	Endonuclease/Exonuclease/phosphatase family protein	NOT DEFINED
Bovatus_04141	5.44	2.6	0.0104286	0.182945	ALJ48735.1	hypothetical protein
Bovatus_04474	2.11	6.31	0.0174629	0.238031	ALJ49067.1	hypothetical protein	Unknown
Bovatus_04302	-2.79	4.87	0.016825	0.231758	ALJ48895.1	hypothetical protein	Unknown
Bovatus_01514	3.52	5.28	0.0145645	0.215014	ALJ46158.1	hypothetical protein	Unknown
Bovatus_00993	-3.75	4.71	0.0153693	0.221046	ALJ45644.1	helix-turn-helix protein	Unknown
Bovatus_01676	-4.99	0.5	0.00930141	0.175582	ALJ46318.1	Ferrous iron transport protein B	NOT DEFINED
Bovatus_01469	-5.6	3.11	0.00992421	0.17915	ALJ46113.1	Putative ribosome biogenesis GTPase RsgA	EC3.6.1.-:EC3.1.3.100
Bovatus_04213	4.49	4.34	0.0134886	0.205335	ALJ48807.1	Cob(I)yrinic acid a,c-diamide adenosyltransferase	EC2.5.1.17
Bovatus_03737	1.83	6.46	0.0178589	0.24086	ALJ48342.1	O-Glycosyl hydrolase family 30	EC3.2.1.136	GH30	Bovatus:81	Bovatus:73
Bovatus_01905	5.26	1.15	0.00997248	0.17915	ALJ46545.1	DNA alkylation repair enzyme	EC3.4.14.4
Bovatus_02180	3.23	5.39	0.0160881	0.226131	ALJ46814.1	hypothetical protein	Unknown
Bovatus_03224	-0.71	9.25	0.00792897	0.164117	ALJ47832.1	hypothetical protein	Unknown
Bovatus_02737	2.21	6	0.018754	0.24293	ALJ47355.1	Rhamnogalacturonan acetylesterase RhgT	EC3.1.1.11	CE12-CE4	Bovatus:48	Bovatus:19
Bovatus_00304	4.5	0.63	0.0111949	0.189677	ALJ44975.1	hypothetical protein	Unknown		Bovatus:9	Bovatus:34
Bovatus_01290	4.77	0.65	0.0107948	0.186855	ALJ45941.1	Susd and RagB outer membrane lipoprotein	Unknown		Bovatus:16	Bovatus:84
Bovatus_01128	5.11	3.32	0.0121151	0.195741	ALJ45779.1	Galactoside O-acetyltransferase	EC2.3.1.79
Bovatus_03869	1.19	7.89	0.0133639	0.205017	ALJ48472.1	Polygalacturonase	EC3.2.1.67	GH28	Bovatus:86
Bovatus_02888	2.1	6.41	0.0188228	0.24293	ALJ47498.1	TonB dependent receptor	NOT DEFINED		Bovatus:50	Bovatus:40
Bovatus_02708	-3.5	5.51	0.0181534	0.24086	ALJ47333.1	Glutamate/gamma-aminobutyrate antiporter	NOT DEFINED
Bovatus_03041	2.59	6.29	0.0197186	0.249062	ALJ47649.1	hypothetical protein	Unknown
Bovatus_03928	-1.74	6.45	0.0188364	0.24293	ALJ48530.1	Transcriptional regulatory protein ZraR	NOT DEFINED
Bovatus_03407	1.55	6.76	0.018878	0.24293	ALJ48014.1	D-lactate dehydrogenase	EC1.1.1.29
Bovatus_03130	0.99	8.36	0.0119495	0.195591	ALJ47738.1	acyl-CoA thioesterase YbgC	EC3.1.2.-
Bovatus_01211	1.61	6.47	0.019896	0.249465	ALJ45862.1	hypothetical protein	Unknown
Bovatus_00802	0.81	8.82	0.0104891	0.183185	ALJ45462.1	FHA domain protein	Unknown
Bovatus_04863	2.32	6.53	0.0209988	0.25996	ALJ49451.1	Heparin-sulfate lyase precursor	EC4.2.2.8	PL12_2	Bovatus:104	Bovatus:107
Bovatus_02627	0.53	11.01	0.0044732	0.123617	ALJ47252.1	hypothetical protein	Unknown
Bovatus_03843	-0.52	11.3	0.00340119	0.105433	ALJ48446.1	fec operon regulator FecR	Unknown		Bovatus:84	Bovatus:77
Bovatus_04412	-3.26	5.07	0.0202387	0.252543	ALJ49005.1	TonB dependent receptor	Unknown		Bovatus:97	Bovatus:101
Bovatus_02134	-3.06	5.22	0.0198844	0.249465	ALJ46768.1	hypothetical protein	Unknown
Bovatus_01567	-4.62	3.64	0.0158055	0.224841	ALJ46211.1	Transcriptional regulatory protein SrrA	NOT DEFINED
Bovatus_04797	-1.21	7.72	0.0153521	0.221046	ALJ49385.1	hypothetical protein	Unknown
Bovatus_00804	-3.45	4.64	0.0189758	0.243388	ALJ45464.1	HTH-type transcriptional regulator DegA	NOT DEFINED
Bovatus_04165	5.01	1.62	0.0140663	0.211643	ALJ48759.1	hypothetical protein	Unknown
Bovatus_03083	-1.02	7.9	0.0138368	0.208995	ALJ47691.1	Sensor histidine kinase TmoS	Unknown		Bovatus:55	Bovatus:48
Bovatus_01810	2.24	6.33	0.0223781	0.271273	ALJ46450.1	Sensor histidine kinase TodS	Unknown		Bovatus:28	Bovatus:96
Bovatus_03113	-2.26	6.06	0.022398	0.271273	ALJ47721.1	hypothetical protein	NOT DEFINED		Bovatus:56	Bovatus:49
Bovatus_03272	-4.45	4.47	0.0154718	0.221706	ALJ47880.1	Dihydrolipoyl dehydrogenase	EC1.8.1.4
Bovatus_01946	5.27	2.39	0.0148576	0.217688	ALJ46581.1	hypothetical protein	Unknown
Bovatus_00457	-0.66	9.13	0.00966577	0.177998	ALJ45125.1	Glycerate dehydrogenase	EC1.1.1.29
Bovatus_03353	3.62	4.77	0.0178305	0.24086	ALJ47960.1	hypothetical protein	Unknown
Bovatus_02555	4.48	4.44	0.0173266	0.23783	ALJ47180.1	Inositol 2-dehydrogenase	EC1.1.1.18:EC1.1.1.369
Bovatus_00737	-1.35	7.24	0.018504	0.2421	ALJ45402.1	Tetratricopeptide repeat protein	Unknown
Bovatus_00480	-4.75	1	0.014535	0.215014	ALJ45147.1	putative poly(glycerol-phosphate) alpha-glucosyltransferase	EC2.4.-.-	GT4
Bovatus_01356	4.44	4.56	0.0185689	0.242138	ALJ46002.1	Serine/threonine-protein kinase pkn1	EC2.7.11.1
Bovatus_00014	0.75	9.26	0.00972551	0.177998	ALJ44686.1	DNA-binding transcriptional regulator MelR	Unknown		Bovatus:1	Bovatus:27
Bovatus_03412	-4.41	4.03	0.0202706	0.252543	ALJ48019.1	TonB dependent receptor	NOT DEFINED		Bovatus:69	Bovatus:17
Bovatus_04416	-3.18	4.99	0.0223273	0.271273	ALJ49009.1	Rhamnogalacturonan endolyase YesW precursor	EC4.2.2.23	PL11_1	Bovatus:97	Bovatus:101
Bovatus_04593	-0.9	7.89	0.0141948	0.212759	ALJ49184.1	hypothetical protein	Unknown
Bovatus_02230	-0.5	10.2	0.00645934	0.150494	ALJ46863.1	Inositol 2-dehydrogenase	EC1.1.1.18:EC1.1.1.369
Bovatus_04954	-2.28	6.45	0.024118	0.285908	ALJ49541.1	hypothetical protein	NOT DEFINED
Bovatus_00112	0.81	8.27	0.0134895	0.205335	ALJ44784.1	Nitroreductase family protein	EC1.5.1.39
Bovatus_00841	0.96	8.29	0.0145651	0.215014	ALJ45499.1	Glutamine synthetase	EC6.3.1.2
Bovatus_02379	-4.42	3.08	0.0195115	0.247821	ALJ47011.1	cofactor-independent phosphoglycerate mutase	EC5.4.2.12
Bovatus_01531	-0.73	9.18	0.0105788	0.183929	ALJ46175.1	Archaeal ATPase	NOT DEFINED
Bovatus_04692	5.02	3.02	0.0181637	0.24086	ALJ49281.1	Xanthine permease XanP	NOT DEFINED		Bovatus:103
Bovatus_02754	-4.93	0.96	0.0160682	0.226131	ALJ47372.1	hypothetical protein
Bovatus_00149	3.73	6.08	0.0254624	0.293832	ALJ44821.1	Efflux pump membrane transporter BepE	NOT DEFINED
Bovatus_03008	0.96	7.9	0.0167441	0.231758	ALJ47617.1	TonB-dependent Receptor Plug Domain protein	Unknown		Bovatus:53	Bovatus:44
Bovatus_00422	4.28	0.35	0.0166143	0.231758	ALJ45090.1	hypothetical protein
Bovatus_00039	0.95	7.94	0.0167173	0.231758	ALJ44711.1	SusD family protein	NOT DEFINED		Bovatus:3	Bovatus:25
Bovatus_03440	0.69	9.67	0.00903907	0.172605	ALJ48047.1	hypothetical protein	Unknown
Bovatus_02720	1.83	6.75	0.0246789	0.289054	ALJ47343.1	Biopolymer transport protein ExbD/TolR	NOT DEFINED
Bovatus_03419	2.6	5.79	0.0263008	0.296901	ALJ48026.1	hypothetical protein	NOT DEFINED		Bovatus:70	Bovatus:18
Bovatus_03784	5.3	1.84	0.0174472	0.238031	ALJ48389.1	Unsaturated rhamnogalacturonyl hydrolase YteR	EC3.2.1.172	GH105
Bovatus_01659	2.48	5.33	0.0264359	0.297176	ALJ46303.1	D-lactate dehydrogenase	EC1.1.1.28
Bovatus_02005	5.03	2.19	0.0193438	0.246492	ALJ46640.1	hypothetical protein	Unknown		Bovatus:31	Bovatus:28
Bovatus_01847	5.35	1.54	0.0182167	0.24086	ALJ46487.1	VTC domain protein	Unknown
Bovatus_01350	5.16	3.09	0.0193412	0.246492	ALJ45996.1	hypothetical protein	Unknown
Bovatus_02211	-3.18	5.17	0.0271075	0.302121	ALJ46844.1	hypothetical protein	NOT DEFINED
Bovatus_00850	-3.14	5.14	0.0258825	0.295197	ALJ45508.1	Putative electron transport protein YccM	NOT DEFINED
Bovatus_03386	0.99	7.75	0.0181925	0.24086	ALJ47993.1	Tyrosine-protein phosphatase precursor	EC3.1.3.48
Bovatus_04529	-4.34	2.46	0.0197365	0.249062	ALJ49120.1	Oligopeptidase A	EC3.4.15.5
Bovatus_00154	4.43	3.87	0.0231124	0.277349	ALJ44826.1	Dihydrolipoyl dehydrogenase	EC1.8.1.4
Bovatus_03658	2.05	6.2	0.0281394	0.304092	ALJ48264.1	hypothetical protein	NOT DEFINED
Bovatus_02017	-2.15	6.04	0.0285405	0.304225	ALJ46652.1	hypothetical protein	Unknown		Bovatus:32	Bovatus:1
Bovatus_02132	3.16	5.65	0.027977	0.304092	ALJ46766.1	Choloylglycine hydrolase	EC3.5.1.24
Bovatus_02141	3.08	5.41	0.0275761	0.304092	ALJ46775.1	putative RNA polymerase sigma factor FecI	NOT DEFINED		Bovatus:35	Bovatus:68
Bovatus_02484	-4.62	3.23	0.0213657	0.262839	ALJ47109.1	Conjugative transposon protein TraO	Unknown
Bovatus_02624	-0.86	8.38	0.0150028	0.218182	ALJ47249.1	hypothetical protein	NOT DEFINED
Bovatus_04414	-4.38	4.15	0.0231888	0.277414	ALJ49007.1	TonB-dependent Receptor Plug Domain protein	Unknown		Bovatus:97	Bovatus:101
Bovatus_04940	-0.51	10.28	0.00746126	0.161467	ALJ49527.1	fec operon regulator FecR	NOT DEFINED		Bovatus:107	Bovatus:110
Bovatus_00296	1.39	6.52	0.0277014	0.304092	ALJ44967.1	hypothetical protein	EC3.1.1.53		Bovatus:8	Bovatus:33
Bovatus_03552	0.45	10.7	0.0062962	0.149277	ALJ48159.1	Magnesium transport protein CorA	NOT DEFINED
Bovatus_00289	-4.46	0.75	0.0204839	0.25439	ALJ44960.1	Cellobiose 2-epimerase	EC5.1.3.8		Bovatus:8	Bovatus:33
Bovatus_00259	-1.33	7.48	0.0218278	0.266845	ALJ44931.1	3'(2'),5'-bisphosphate nucleotidase CysQ	EC3.1.3.7
Bovatus_02083	-4.99	3.2	0.0234611	0.279816	ALJ46718.1	hypothetical protein	NOT DEFINED		Bovatus:34	Bovatus:11
Bovatus_02325	0.77	9.79	0.0100749	0.17915	ALJ46958.1	Starch-binding associating with outer membrane	Unknown		Bovatus:40	Bovatus:62
Bovatus_00998	1.42	6.63	0.0278876	0.304092	ALJ45649.1	hypothetical protein	Unknown
Bovatus_00048	-2.62	5.63	0.0307137	0.31536	ALJ44720.1	TonB dependent receptor	Unknown
Bovatus_00547	-0.63	9.88	0.00947655	0.176777	ALJ45213.1	ParB-like nuclease domain protein	Unknown
Bovatus_01069	-1.36	6.38	0.0280286	0.304092	ALJ45720.1	coproporphyrinogen III oxidase	EC1.21.98.3
Bovatus_01774	1.11	7.47	0.0217314	0.266499	ALJ46414.1	hypothetical protein	NOT DEFINED
Bovatus_04704	-3.58	4.89	0.030032	0.311161	ALJ49293.1	Epimerase family protein	NOT DEFINED
Bovatus_03452	2.36	5.67	0.0326848	0.324525	ALJ48059.1	Arylsulfatase precursor	EC3.1.6.8		Bovatus:71	Bovatus:36
Bovatus_04635	-1.38	6.89	0.0252292	0.292868	ALJ49226.1	hypothetical protein	Unknown
Bovatus_01608	-0.63	10.38	0.00757467	0.161924	ALJ46252.1	Myo-inositol-1-phosphate synthase	EC5.5.1.4
Bovatus_00538	1.38	6.81	0.0285299	0.304225	ALJ45205.1	Spermidine N(1)-acetyltransferase	EC2.3.1.57
Bovatus_01073	1.08	7.6	0.0229913	0.277349	ALJ45724.1	hypothetical protein	Unknown
Bovatus_03101	-4.06	0.42	0.0239016	0.284204	ALJ47709.1	hypothetical protein	Unknown
Bovatus_04232	4.08	4.54	0.0279195	0.304092	ALJ48826.1	hypothetical protein	Unknown
Bovatus_00145	4.34	2.56	0.0265194	0.29726	ALJ44817.1	hypothetical protein	Unknown
Bovatus_00032	4.84	1.04	0.024451	0.28898	ALJ44704.1	Alginate lyase	Unknown		Bovatus:2	Bovatus:26
Bovatus_04428	4.72	1.5	0.0263356	0.296901	ALJ49021.1	hypothetical protein	Unknown
Bovatus_01987	-4.84	1.5	0.0245995	0.288989	ALJ46622.1	hypothetical protein	NOT DEFINED		Bovatus:30	Bovatus:29
Bovatus_01505	3.07	5.04	0.0316532	0.320796	ALJ46149.1	Calcineurin-like phosphoesterase	Unknown		Bovatus:20	Bovatus:87
Bovatus_00076	2.27	6.4	0.034662	0.334222	ALJ44748.1	Membrane-bound lytic murein transglycosylase F precursor	EC4.2.2.-	GH23
Bovatus_04020	1.45	6.82	0.0305046	0.314865	ALJ48615.1	ABC-2 family transporter protein	NOT DEFINED
Bovatus_02118	0.76	8.94	0.0149373	0.21804	ALJ46752.1	hypothetical protein	Unknown
Bovatus_01131	5.26	2.02	0.0261254	0.296268	ALJ45782.1	UDP-glucose 6-dehydrogenase YwqF	EC1.1.1.22
Bovatus_02900	3.14	4.88	0.0337434	0.330838	ALJ47510.1	SusD family protein	NOT DEFINED		Bovatus:51	Bovatus:41
Bovatus_00536	2.75	5.19	0.035377	0.337412	ALJ45203.1	Recombination protein RecR	NOT DEFINED
Bovatus_04548	-5.26	2.47	0.0253969	0.293832	ALJ49139.1	TraB family protein	NOT DEFINED
Bovatus_04479	-4.92	3.66	0.0342971	0.333837	ALJ49072.1	hypothetical protein	Unknown
Bovatus_02567	-4.83	3.74	0.0299223	0.311161	ALJ47192.1	Arabinoxylan arabinofuranohydrolase precursor	EC3.2.1.55	GH43_29
Bovatus_01109	4.2	2.28	0.0308572	0.315537	ALJ45760.1	UDP-Galalpha-D-GlcNAc-diphosphoundecaprenol beta-1,3-galactosyltransferase	EC2.4.-.-	GT2
Bovatus_00647	-3.57	4.8	0.0371689	0.347859	ALJ45313.1	hypothetical protein	Unknown		Bovatus:14	Bovatus:6
Bovatus_03770	1.75	6.29	0.0359425	0.340453	ALJ48375.1	Autoinducer 2 sensor kinase/phosphatase LuxQ	EC2.7.13.1
Bovatus_01787	0.81	8.61	0.0182248	0.24086	ALJ46427.1	ECF RNA polymerase sigma factor SigL	NOT DEFINED
Bovatus_02715	3.53	4.97	0.0340538	0.333046	ALJ47338.1	hypothetical protein	Unknown
Bovatus_03363	3.98	0.74	0.0291409	0.308941	ALJ47970.1	Bacterial DNA-binding protein	Unknown
Bovatus_03536	3.37	4.49	0.0357481	0.339434	ALJ48143.1	WLM domain protein	NOT DEFINED
Bovatus_01002	4.17	0.76	0.0279754	0.304092	ALJ45653.1	hypothetical protein	Unknown
Bovatus_00496	4.59	1.16	0.0284819	0.304225	ALJ45163.1	O-Antigen ligase	Unknown
Bovatus_04367	5.22	3.3	0.0317923	0.321374	ALJ48960.1	SusD family protein	NOT DEFINED		Bovatus:96	Bovatus:100
Bovatus_00738	-1.09	8.5	0.0183477	0.24086	ALJ45403.1	hypothetical protein	Unknown
Bovatus_04838	-1.97	6.5	0.0390844	0.358373	ALJ49426.1	ATP-dependent RecD-like DNA helicase	EC3.6.4.12
Bovatus_02119	-4.1	3.59	0.0348463	0.334222	ALJ46753.1	Ketol-acid reductoisomerase	EC1.1.1.86
Bovatus_01784	1.14	7.53	0.0297622	0.311161	ALJ46424.1	oxaloacetate decarboxylase subunit gamma	EC4.1.1.3
Bovatus_01382	-0.84	8.71	0.0183465	0.24086	ALJ46028.1	Polysaccharide biosynthesis protein	Unknown
Bovatus_00117	0.6	9.13	0.0157854	0.224841	ALJ44789.1	Peptidase S46	Unknown
Bovatus_02227	-0.55	9.51	0.0127707	0.201448	ALJ46860.1	Inosose dehydratase	Unknown
Bovatus_00301	3.77	4.41	0.0381227	0.355085	ALJ44972.1	hypothetical protein	EC3.1.1.53		Bovatus:9	Bovatus:34
Bovatus_01471	4.85	1.57	0.0311328	0.316342	ALJ46115.1	hypothetical protein	Unknown
Bovatus_03653	1.48	6.92	0.0343053	0.333837	ALJ48259.1	hypothetical protein	EC3.2.1.23		Bovatus:78	Bovatus:70
Bovatus_02212	0.73	9.39	0.0147548	0.216995	ALJ46845.1	N-acetylmuramoyl-L-alanine amidase AmiA precursor	EC3.5.1.28
Bovatus_02177	4.61	3.35	0.0348575	0.334222	ALJ46811.1	hypothetical protein	Unknown
Bovatus_04014	-3.56	4.56	0.0408073	0.363726	ALJ48609.1	Septum site-determining protein MinD	NOT DEFINED
Bovatus_02452	-3.85	2.81	0.0370842	0.347859	ALJ47078.1	Thiamine-monophosphate kinase	EC2.7.4.16
Bovatus_02587	4.3	1.78	0.0320605	0.32325	ALJ47212.1	hypothetical protein	Unknown
Bovatus_03522	2.22	6.19	0.0424066	0.367024	ALJ48129.1	GtrA-like protein	EC2.4.-.-
Bovatus_03614	-1.32	7.04	0.0330403	0.327003	ALJ48220.1	TonB-dependent Receptor Plug Domain protein	Unknown		Bovatus:75	Bovatus:35
Bovatus_01849	-4.5	1.26	0.0326215	0.324525	ALJ46489.1	HTH-type transcriptional regulator ChbR	NOT DEFINED
Bovatus_03215	1.04	7.48	0.0283042	0.304192	ALJ47823.1	Glycosyl hydrolase family 92	Unknown	GH92
Bovatus_02298	3.8	1.35	0.0354489	0.337412	ALJ46931.1	tRNA-specific adenosine deaminase	EC3.5.4.33
Bovatus_03146	2.24	5.35	0.0428741	0.367334	ALJ47754.1	Periplasmic beta-glucosidase precursor	EC3.2.1.21	GH3	Bovatus:57	Bovatus:51
Bovatus_03807	-1.34	6.95	0.0324372	0.323762	ALJ48412.1	Vitamin B12 transporter BtuB	NOT DEFINED		Bovatus:83	Bovatus:76
Bovatus_01917	-4.64	1.83	0.0331015	0.327003	ALJ46557.1	2-isopropylmalate synthase	EC2.3.3.13
Bovatus_04959	-4.56	3.31	0.0353208	0.337412	ALJ49546.1	SusD family protein	NOT DEFINED		Bovatus:108	Bovatus:111
Bovatus_00999	1.24	7.41	0.0299831	0.311161	ALJ45650.1	hypothetical protein	Unknown
Bovatus_04381	4.16	3.39	0.0403558	0.363726	ALJ48974.1	Xylan 1,4-beta-xylosidase precursor	EC3.2.1.21	GH3	Bovatus:96	Bovatus:100
Bovatus_04466	1.46	7.13	0.038581	0.357651	ALJ49059.1	Sensor histidine kinase TmoS	Unknown
Bovatus_00095	-1.11	7.49	0.0297523	0.311161	ALJ44767.1	ATP phosphoribosyltransferase	EC2.4.2.17
Bovatus_00699	4.19	4.11	0.0397179	0.360866	ALJ45365.1	metal-dependent hydrolase	Unknown
Bovatus_01733	2.69	5.29	0.0438159	0.369413	ALJ46374.1	Pullulanase precursor	EC3.2.1.41	GH13_14	Bovatus:26
Bovatus_03921	3.38	4.4	0.041334	0.364226	ALJ48523.1	Raffinose synthase or seed inhibition protein Sip1	EC3.2.1.24	GH36	Bovatus:90	Bovatus:83
Bovatus_01239	3.85	4.44	0.0417109	0.364226	ALJ45890.1	Putative aminoacrylate peracid reductase RutC	NOT DEFINED
Bovatus_03225	-1.26	6.93	0.0364754	0.343836	ALJ47833.1	Non-canonical purine NTP pyrophosphatase	EC3.6.1.66
Bovatus_04299	-1.8	6.52	0.0416291	0.364226	ALJ48892.1	hypothetical protein
Bovatus_00021	1.54	6.34	0.0430369	0.367334	ALJ44693.1	O-Glycosyl hydrolase family 30	EC3.2.1.45	GH30_2	Bovatus:1	Bovatus:27
Bovatus_00760	3.43	4.14	0.0432738	0.367334	ALJ45422.1	Efflux pump membrane transporter BepE	NOT DEFINED
Bovatus_02620	0.51	9.99	0.0124003	0.198811	ALJ47245.1	sensory histidine kinase DcuS	EC2.7.13.3
Bovatus_01552	2.57	5.4	0.0465903	0.383269	ALJ46196.1	outer membrane channel protein	NOT DEFINED
Bovatus_01432	3.89	3.86	0.0414667	0.364226	ALJ46076.1	Cystathionine beta-lyase PatB	EC4.4.1.8
Bovatus_01935	4.55	2.26	0.0391608	0.358373	ALJ46570.1	hypothetical protein	Unknown
Bovatus_00619	4.06	4.33	0.0412743	0.364226	ALJ45285.1	hypothetical protein	Unknown		Bovatus:13	Bovatus:7
Bovatus_02462	4.77	2.31	0.0385275	0.357651	ALJ47087.1	hypothetical protein		GH3	Bovatus:44	Bovatus:8
Bovatus_02575	-4.63	1.96	0.0376885	0.351879	ALJ47200.1	hypothetical protein
Bovatus_02078	-1.28	7.87	0.0266489	0.297858	ALJ46713.1	Regulatory protein AsnC	NOT DEFINED
Bovatus_04729	4.68	3.4	0.0412683	0.364226	ALJ49318.1	hypothetical protein	Unknown
Bovatus_04431	3.61	1.17	0.0418412	0.36455	ALJ49024.1	hypothetical protein	EC2.3.1.117
Bovatus_00220	-4.28	1.23	0.0391325	0.358373	ALJ44892.1	Polysaccharide biosynthesis/export protein	NOT DEFINED
Bovatus_03299	0.81	7.48	0.0298607	0.311161	ALJ47907.1	hypothetical protein	Unknown
Bovatus_01597	3.19	5.53	0.0481555	0.385422	ALJ46241.1	hypothetical protein	Unknown		Bovatus:22	Bovatus:89
Bovatus_04318	-0.95	7.48	0.0306547	0.31536	ALJ48911.1	NADH-quinone oxidoreductase subunit J	EC1.6.5.3
Bovatus_00207	-4.48	2.43	0.0402655	0.363726	ALJ44879.1	Xylulose kinase	EC2.7.1.16
Bovatus_01345	-4.67	1.55	0.0394604	0.359835	ALJ45991.1	tetratricopeptide repeat protein	NOT DEFINED
Bovatus_00501	4.03	3.84	0.0440445	0.370542	ALJ45168.1	Aminopeptidase E	EC3.4.22.40
Bovatus_01485	3.86	2.96	0.0449621	0.375837	ALJ46129.1	hypothetical protein	Unknown
Bovatus_04457	3.79	0.64	0.0411513	0.364226	ALJ49050.1	hypothetical protein	Unknown		Bovatus:99	Bovatus:102
Bovatus_04758	-4.42	3.07	0.0423949	0.367024	ALJ49347.1	Bacterial DNA-binding protein	Unknown
Bovatus_00002	-4.74	2.93	0.0408169	0.363726	ALJ44674.1	Glycosyl hydrolases family 28	EC3.2.1.172	GH28
Bovatus_02394	-3.89	4.6	0.0459756	0.381744	ALJ47026.1	Homoserine O-succinyltransferase	EC2.3.1.46
Bovatus_02366	-0.44	11.33	0.00644833	0.150494	ALJ46998.1	acetyltransferase	EC2.7.4.25
Bovatus_02960	3.14	5.17	0.0493617	0.387757	ALJ47569.1	hypothetical protein	Unknown
Bovatus_03000	-1.56	6.92	0.0415821	0.364226	ALJ47609.1	TonB dependent receptor	Unknown		Bovatus:53	Bovatus:44
Bovatus_00962	-4.17	3.87	0.0444034	0.37276	ALJ45619.1	Signal transduction histidine-protein kinase ArlS	EC2.7.13.3
Bovatus_03747	-4.84	2.11	0.0419845	0.364985	ALJ48352.1	hypothetical protein	EC3.2.1.50
Bovatus_00430	3.67	3.94	0.0481778	0.385422	ALJ45098.1	hypothetical protein
Bovatus_01458	3.85	4.19	0.0479042	0.385422	ALJ46102.1	hypothetical protein	Unknown		Bovatus:18	Bovatus:13
Bovatus_02535	3.04	5.29	0.0518683	0.393233	ALJ47160.1	Extracellular xylan exo-alpha-(1->2)-glucuronosidase precursor	EC3.2.1.139	GH67	Bovatus:45
Bovatus_01371	-1.85	6.29	0.0491852	0.387757	ALJ46017.1	Acyltransferase family protein
Bovatus_03456	-1.05	7.09	0.0332868	0.327867	ALJ48063.1	Outer membrane protein OprM precursor	NOT DEFINED
Bovatus_02061	0.56	9.54	0.0161275	0.226131	ALJ46696.1	TonB-dependent Receptor Plug Domain protein	Unknown		Bovatus:33	Bovatus:12
Bovatus_04262	3.6	2.49	0.0489978	0.387757	ALJ48856.1	hypothetical protein	Unknown
Bovatus_01894	2.44	5.45	0.0529655	0.394603	ALJ46534.1	Iron hydrogenase 1	EC1.12.7.2
Bovatus_03269	4.32	1.4	0.0436866	0.369118	ALJ47877.1	Beta-1,4-mannooligosaccharide phosphorylase	EC2.4.1.339:EC2.4.1.340	GH130	Bovatus:64	Bovatus:58
Bovatus_03759	2.19	6.11	0.0521697	0.393233	ALJ48364.1	hypothetical protein	Unknown			Bovatus:74
Bovatus_03639	-4.38	3.27	0.0467087	0.383269	ALJ48245.1	Arylsulfatase	EC3.1.6.-
Bovatus_01411	-4.06	3.87	0.0492978	0.387757	ALJ46057.1	Phosphoribosyl-ATP pyrophosphatase	EC3.6.1.31:EC3.5.4.19
Bovatus_04206	-3.6	0.45	0.0455627	0.380046	ALJ48800.1	Bacterial membrane flanked domain protein	Unknown
Bovatus_04456	-4.25	3.12	0.047175	0.384476	ALJ49049.1	Polygalacturonase	EC3.2.1.172	GH28	Bovatus:99	Bovatus:102
Bovatus_01614	3.56	3.12	0.0508664	0.392362	ALJ46258.1	FtsX-like permease family protein	NOT DEFINED
Bovatus_00122	1.23	6.56	0.0469484	0.383428	ALJ44794.1	Tetratricopeptide repeat protein	Unknown
Bovatus_02318	3.85	3.96	0.0504445	0.3911	ALJ46951.1	Toluene efflux pump periplasmic linker protein TtgG precursor	NOT DEFINED
Bovatus_04742	1.19	6.86	0.0427786	0.367334	ALJ49331.1	Autoinducer 2 sensor kinase/phosphatase LuxQ	EC2.1.1.80:EC3.1.1.61
Bovatus_00040	3.84	4.47	0.0519312	0.393233	ALJ44712.1	Bacterial Ig-like domain (group 2)	EC3.2.1.51		Bovatus:3	Bovatus:25
Bovatus_04481	-2.59	6.23	0.053819	0.397996	ALJ49074.1	Prolyl tripeptidyl peptidase precursor	EC3.4.14.5
Bovatus_03704	1.98	6.05	0.0530576	0.394603	ALJ48309.1	TonB dependent receptor	Unknown		Bovatus:80	Bovatus:72
Bovatus_02355	2.56	5.58	0.0544571	0.401198	ALJ46987.1	Inner membrane protein YbaL	NOT DEFINED
Bovatus_02514	2.82	5.26	0.0550774	0.403757	ALJ47139.1	Beta-galactosidase	EC3.2.1.23	GH2	Bovatus:45
Bovatus_04458	4.11	5.32	0.0528538	0.394603	ALJ49051.1	molybdenum cofactor biosynthesis protein A	NOT DEFINED
Bovatus_04304	-3.44	4.25	0.0531636	0.394641	ALJ48897.1	putative DMT superfamily transporter inner membrane protein	NOT DEFINED
Bovatus_03159	3.97	4.33	0.0516089	0.393233	ALJ47767.1	Periplasmic beta-glucosidase precursor	EC3.2.1.21	GH3	Bovatus:58	Bovatus:52
Bovatus_02690	-4.36	2.53	0.0481701	0.385422	ALJ47315.1	Beta-glucanase precursor	EC3.2.1.73	GH16
Bovatus_03221	-2.41	5.47	0.0561121	0.408012	ALJ47829.1	Bacterial alpha-L-rhamnosidase	EC3.2.1.40	GH78
Bovatus_04788	2.53	4.76	0.0562379	0.408168	ALJ49376.1	hypothetical protein
Bovatus_00573	-2.02	6.24	0.0504871	0.3911	ALJ45239.1	TonB-dependent Receptor Plug Domain protein	NOT DEFINED		Bovatus:11	Bovatus:85
Bovatus_00917	3.51	4.27	0.0530205	0.394603	ALJ45574.1	2'-dehydrokanamycin reductase	EC5.1.3.2
Bovatus_03503	-3.96	3.21	0.0509508	0.392362	ALJ48110.1	Histidinol-phosphate aminotransferase	EC2.6.1.9
Bovatus_04181	3.48	4.46	0.0541248	0.399503	ALJ48775.1	hypothetical protein	Unknown
Bovatus_00291	3.41	4.59	0.0551141	0.403757	ALJ44962.1	SusD family protein	NOT DEFINED		Bovatus:8	Bovatus:33
Bovatus_02263	-3.99	3.38	0.0504421	0.3911	ALJ46896.1	Internalin-J precursor
Bovatus_01264	-3.09	4.02	0.0571564	0.412527	ALJ45915.1	Altronate dehydratase	EC4.2.1.7
Bovatus_04202	4.01	0.84	0.0497722	0.390198	ALJ48796.1	putative peptidase	EC3.4.24.-
Bovatus_02419	3.13	5.18	0.0582776	0.418315	ALJ47050.1	Potassium-transporting ATPase A chain	EC3.6.3.12
Bovatus_02376	4.3	2.41	0.0516858	0.393233	ALJ47008.1	Thiamin pyrophosphokinase, catalytic domain	EC2.7.6.2
Bovatus_00987	4.49	3.23	0.0526631	0.394603	ALJ45638.1	Phosphomethylpyrimidine synthase	EC4.1.99.17
Bovatus_02922	-1.09	7.9	0.030973	0.315537	ALJ47531.1	2-oxoglutarate oxidoreductase subunit KorB	EC1.2.7.3:EC1.2.7.11
Bovatus_03915	4.08	4.17	0.0547778	0.402802	ALJ48517.1	Cellobiose 2-epimerase	Unknown	GH76	Bovatus:89	Bovatus:82
Bovatus_04945	-4.73	3.29	0.0519716	0.393233	ALJ49532.1	hypothetical protein	Unknown		Bovatus:107	Bovatus:110
Bovatus_02412	1.26	7.35	0.039758	0.360866	ALJ47043.1	Tyrosine recombinase XerD	NOT DEFINED
Bovatus_02374	2.17	5.72	0.0594261	0.421694	ALJ47006.1	TonB dependent receptor	NOT DEFINED
Bovatus_00378	2.71	4.92	0.0603283	0.424637	ALJ45046.1	hypothetical protein	Unknown
Bovatus_02941	-1.11	7.49	0.0363565	0.343542	ALJ47550.1	Thermostable beta-glucosidase B	EC3.2.1.21	GH3	Bovatus:52	Bovatus:43
Bovatus_01719	4.2	2.44	0.0533684	0.395412	ALJ46360.1	RNA polymerase sigma factor SigV	NOT DEFINED		Bovatus:25	Bovatus:92
Bovatus_02580	-4.01	1.3	0.0528981	0.394603	ALJ47205.1	hypothetical protein	Unknown
Bovatus_02847	3.9	4.17	0.0586508	0.419455	ALJ47459.1	Gram-negative bacterial tonB protein	NOT DEFINED
Bovatus_01409	-3.01	4.34	0.0617934	0.431417	ALJ46055.1	Lysine-sensitive aspartokinase 3	EC2.7.2.4
Bovatus_04021	0.87	7.91	0.0324339	0.323762	ALJ48616.1	Multidrug export protein EmrA	NOT DEFINED
Bovatus_00047	0.58	9.6	0.0183181	0.24086	ALJ44719.1	Metalloprotease LoiP precursor	EC3.4.24.-
Bovatus_02467	-1.49	6.38	0.0558415	0.406801	ALJ47092.1	SusD family protein	NOT DEFINED		Bovatus:44	Bovatus:8
Bovatus_03668	-2.35	5.55	0.0629004	0.43321	ALJ48274.1	Phosphate-selective porin O and P	Unknown
Bovatus_02852	-3.28	4.34	0.0627479	0.43321	ALJ47464.1	DNA mismatch repair protein MutS	NOT DEFINED
Bovatus_03787	3.44	4.48	0.0587584	0.419458	ALJ48392.1	Inner membrane protein YohK	Unknown
Bovatus_02497	4.17	2.49	0.0572603	0.412527	ALJ47122.1	hypothetical protein	Unknown
Bovatus_01117	3.72	1.05	0.0584597	0.418854	ALJ45768.1	hypothetical protein	Unknown
Bovatus_01828	-3.02	4.62	0.0644833	0.437639	ALJ46468.1	Pectate lyase superfamily protein	EC4.2.2.17	GH91	Bovatus:29	Bovatus:97
Bovatus_03821	-2.52	4.62	0.0647306	0.437639	ALJ48426.1	N-acetylornithine carbamoyltransferase	EC2.1.3.11
Bovatus_04941	2.67	5.22	0.0648123	0.437639	ALJ49528.1	hypothetical protein			Bovatus:107
Bovatus_00313	2.9	5.28	0.0648851	0.437639	ALJ44984.1	Beta-hexosaminidase	EC3.2.1.52	GH20	Bovatus:10	Bovatus:9
Bovatus_03175	-4.54	2.96	0.0591899	0.421694	ALJ47783.1	hypothetical protein	Unknown	GH115	Bovatus:59
Bovatus_02167	-3.45	4.57	0.0651591	0.437977	ALJ46801.1	hypothetical protein	NOT DEFINED		Bovatus:36	Bovatus:67
Bovatus_01497	-3.76	3.6	0.0610905	0.429059	ALJ46141.1	Glycolate permease GlcA	NOT DEFINED
Bovatus_02556	-3.19	0.56	0.0600728	0.424196	ALJ47181.1	hypothetical protein	Unknown
Bovatus_03855	2.89	4.3	0.065877	0.441285	ALJ48458.1	Bacterial Ig-like domain (group 2)	EC3.2.1.51		Bovatus:85	Bovatus:78
Bovatus_00594	4.23	2.55	0.0612772	0.429599	ALJ45260.1	Beta-L-arabinobiosidase precursor	EC3.2.1.187	GH143-GH142	Bovatus:12	Bovatus:86
Bovatus_02313	-1.22	6.7	0.0475112	0.385422	ALJ46946.1	Sensor histidine kinase TodS	Unknown		Bovatus:39	Bovatus:63
Bovatus_01738	-1.09	7.03	0.0447372	0.374758	ALJ46378.1	ECF RNA polymerase sigma factor RpoE	NOT DEFINED			Bovatus:94
Bovatus_00608	3.36	4.93	0.0670644	0.443918	ALJ45274.1	hypothetical protein	Unknown
Bovatus_00454	2.25	5.81	0.0667857	0.442823	ALJ45122.1	hypothetical protein	Unknown
Bovatus_02630	-3.04	5.09	0.0677207	0.445292	ALJ47255.1	Multidrug resistance protein MdtK	NOT DEFINED
Bovatus_04353	1.28	7.04	0.0500371	0.390727	ALJ48946.1	hypothetical protein	EC3.6.4.12
Bovatus_02911	0.54	10	0.0159938	0.226131	ALJ47521.1	hypothetical protein	Unknown
Bovatus_01655	-3.11	3.66	0.0672282	0.444252	ALJ46299.1	ECF RNA polymerase sigma factor SigR	NOT DEFINED
Bovatus_03197	-2.79	4.28	0.0686386	0.445292	ALJ47805.1	Extracellular endo-alpha-(1->5)-L-arabinanase 1 precursor	EC3.2.1.21	GH43_31	Bovatus:60	Bovatus:54
Bovatus_03019	-2.67	4.92	0.0689944	0.445292	ALJ47628.1	hypothetical protein	Unknown	GT
Bovatus_01048	3.45	3.98	0.0683642	0.445292	ALJ45699.1	hypothetical protein	Unknown
Bovatus_01195	-3.2	4.01	0.0689921	0.445292	ALJ45846.1	Ferredoxin-dependent glutamate synthase 1	EC1.4.1.13:EC1.4.1.14
Bovatus_03453	0.97	7.56	0.0387541	0.358373	ALJ48060.1	Sensor histidine kinase TodS	Unknown		Bovatus:71	Bovatus:36
Bovatus_02056	4.22	2.13	0.0629955	0.43321	ALJ46691.1	hypothetical protein	Unknown
Bovatus_02331	3.87	3.81	0.0666362	0.442823	ALJ46964.1	hypothetical protein	NOT DEFINED
Bovatus_04327	-3.39	0.43	0.0647478	0.437639	ALJ48920.1	hypothetical protein	Unknown		Bovatus:95	Bovatus:99
Bovatus_01755	2.83	4.85	0.0698252	0.447298	ALJ46395.1	hypothetical protein	NOT DEFINED
Bovatus_03200	2.99	5.16	0.0701765	0.447298	ALJ47808.1	hypothetical protein	Unknown		Bovatus:60	Bovatus:54
Bovatus_00498	0.61	8.99	0.0248461	0.289701	ALJ45165.1	Outer membrane efflux protein	Unknown
Bovatus_03823	0.8	8.6	0.0300662	0.311161	ALJ48428.1	hypothetical protein	Unknown
Bovatus_03569	3.68	3.91	0.0690932	0.445292	ALJ48175.1	hypothetical protein	Unknown
Bovatus_03512	-0.69	8.8	0.0256978	0.294104	ALJ48119.1	Glycosyltransferase family 6	EC2.4.1.309	GT6
Bovatus_00676	1.53	6.58	0.0620605	0.431417	ALJ45342.1	Glycosyl hydrolases family 2, sugar binding domain	Unknown	GH106
Bovatus_04241	3.13	4.48	0.0716538	0.449994	ALJ48835.1	hypothetical protein	Unknown
Bovatus_03245	-4.22	1.91	0.0646893	0.437639	ALJ47853.1	Heparinase II/III-like protein	EC4.2.2.26	PL	Bovatus:63	Bovatus:57
Bovatus_02285	2.02	5.69	0.0704028	0.447831	ALJ46918.1	TonB-dependent Receptor Plug Domain protein	Unknown		Bovatus:38	Bovatus:64
Bovatus_03706	-2.77	4.56	0.0729228	0.450775	ALJ48311.1	Xylose operon regulatory protein	NOT DEFINED		Bovatus:80	Bovatus:72
Bovatus_02019	3.67	4.36	0.0718931	0.449994	ALJ46654.1	Vitamin B12 transporter BtuB	NOT DEFINED		Bovatus:32	Bovatus:1
Bovatus_03474	-2.75	5.12	0.0736716	0.450775	ALJ48081.1	SusD family protein	NOT DEFINED		Bovatus:73	Bovatus:37
Bovatus_02200	4.01	2.44	0.0685733	0.445292	ALJ46833.1	hypothetical protein	NOT DEFINED
Bovatus_02172	-2.56	5.31	0.0739921	0.451315	ALJ46806.1	HTH-type transcriptional repressor YvoA	NOT DEFINED		Bovatus:36	Bovatus:67
Bovatus_01948	2.59	5.34	0.0744205	0.452773	ALJ46583.1	site-specific tyrosine recombinase XerD	Unknown
Bovatus_03705	-2.67	5.24	0.0740656	0.451315	ALJ48310.1	hypothetical protein	Unknown		Bovatus:80	Bovatus:72
Bovatus_02872	3.05	4.76	0.073397	0.450775	ALJ47482.1	hypothetical protein	Unknown
Bovatus_00371	3.37	0.69	0.0689005	0.445292	ALJ45040.1	hypothetical protein	Unknown
Bovatus_02170	-0.93	7.59	0.043214	0.367334	ALJ46804.1	N-acetyl-D-glucosamine kinase	EC2.7.1.2		Bovatus:36	Bovatus:67
Bovatus_00329	-2.58	4.87	0.0749004	0.45428	ALJ45000.1	hypothetical protein	Unknown
Bovatus_00920	3.85	2.07	0.0702047	0.447298	ALJ45577.1	Clostripain family protein	Unknown
Bovatus_00058	2.1	5.65	0.0747242	0.453915	ALJ44730.1	Inner membrane transport protein YnfM	Unknown
Bovatus_04437	2.2	5.52	0.0760826	0.457006	ALJ49030.1	Evolved beta-galactosidase subunit alpha	EC3.2.1.23	GH2	Bovatus:98	Bovatus:102
Bovatus_02733	2.9	5.3	0.0767356	0.457006	ALJ47351.1	Alpha-L-arabinofuranosidase C precursor	EC3.2.1.4	GH-CBM35	Bovatus:48	Bovatus:19
Bovatus_00683	4.21	2.34	0.0721949	0.450775	ALJ45349.1	RNA polymerase sigma factor SigM	NOT DEFINED
Bovatus_01284	-3.12	0.42	0.0722504	0.450775	ALJ45935.1	L-fucose mutarotase	EC5.1.3.32
Bovatus_02463	1.52	6.39	0.0620879	0.431417	ALJ47088.1	hypothetical protein	Unknown		Bovatus:44	Bovatus:8
Bovatus_04884	4.04	2.1	0.0730711	0.450775	ALJ49472.1	Heparin lyase I precursor	EC4.2.2.7	PL13	Bovatus:105	Bovatus:107
Bovatus_03089	-2.64	4.93	0.0768482	0.457006	ALJ47697.1	Exoenzyme S synthesis regulatory protein ExsA	NOT DEFINED
Bovatus_02869	-4.11	1.87	0.071289	0.449994	ALJ47479.1	DNA utilization protein GntX	EC2.4.2.14
Bovatus_04151	2.8	4.69	0.0775272	0.457125	ALJ48745.1	Tyrosine recombinase XerD	Unknown
Bovatus_00866	3.17	4.12	0.0776197	0.457125	ALJ45523.1	SusD family protein	NOT DEFINED		Bovatus:15	Bovatus:45
Bovatus_02663	-1	7.26	0.0487935	0.387181	ALJ47288.1	TonB-dependent Receptor Plug Domain protein	Unknown		Bovatus:47	Bovatus:30
Bovatus_03266	-0.92	7.72	0.0392085	0.358373	ALJ47874.1	TonB dependent receptor	NOT DEFINED		Bovatus:64	Bovatus:58
Bovatus_03565	3.25	4.9	0.0770943	0.457006	ALJ48171.1	hypothetical protein	Unknown
Bovatus_02350	-2.81	4.87	0.0780915	0.457125	ALJ46982.1	Choloylglycine hydrolase	EC3.5.1.24
Bovatus_02741	2.7	5.12	0.0784243	0.457125	ALJ47359.1	hypothetical protein	Unknown
Bovatus_01651	-1.31	6.7	0.0556624	0.406253	ALJ46295.1	putative hydrolase	NOT DEFINED
Bovatus_03447	0.87	7.87	0.0391188	0.358373	ALJ48054.1	hypothetical protein	Unknown			Bovatus:36
Bovatus_01430	-2.29	5.36	0.0783477	0.457125	ALJ46074.1	anaerobic ribonucleoside triphosphate reductase	EC1.1.98.6
Bovatus_02886	1.38	7.13	0.0619027	0.431417	ALJ47496.1	HTH-type transcriptional regulator DegA	NOT DEFINED			Bovatus:40
Bovatus_01223	-2.98	4.49	0.0798982	0.45969	ALJ45874.1	L-asparaginase 1	EC3.5.1.1
Bovatus_00530	1.93	6.53	0.0714202	0.449994	ALJ45197.1	Acetylxylan esterase precursor	EC3.2.1.8
Bovatus_02085	-1.6	6.18	0.066758	0.442823	ALJ46720.1	hypothetical protein	Unknown		Bovatus:34	Bovatus:11
Bovatus_04161	-3.03	4.72	0.0799698	0.45969	ALJ48755.1	site-specific tyrosine recombinase XerD	Unknown
Bovatus_00334	-1.68	6.62	0.073638	0.450775	ALJ45005.1	hypothetical protein	Unknown
Bovatus_00229	-2.29	5.43	0.0779355	0.457125	ALJ44901.1	Polysaccharide biosynthesis/export protein	NOT DEFINED
Bovatus_03554	-3.73	3.45	0.0781075	0.457125	ALJ48161.1	2,3-bisphosphoglycerate-independent phosphoglycerate mutase	EC5.4.2.12
Bovatus_01079	-0.71	8.66	0.0294934	0.311161	ALJ45730.1	hypothetical protein	Unknown
Bovatus_02075	-1.14	6.98	0.0517558	0.393233	ALJ46710.1	Cardiolipin synthase	EC2.7.8.-
Bovatus_03059	3.81	3.24	0.0786316	0.457125	ALJ47667.1	Glycosyl hydrolases family 2, sugar binding domain	EC3.1.1.53		Bovatus:54	Bovatus:46
Bovatus_04388	-0.75	7.3	0.0426895	0.367334	ALJ48981.1	Acetylxylan esterase precursor	EC3.1.1.53
Bovatus_04591	3.87	1.13	0.0771023	0.457006	ALJ49182.1	ECF RNA polymerase sigma factor SigW	NOT DEFINED
Bovatus_04393	-3.62	2.98	0.0798884	0.45969	ALJ48986.1	Bacterial Ig-like domain (group 2)	Unknown
Bovatus_03861	4.06	2.62	0.0795159	0.45969	ALJ48464.1	hypothetical protein	EC4.2.2.2	PL1_2	Bovatus:86
Bovatus_04313	-1.91	5.96	0.0734339	0.450775	ALJ48906.1	Autoinducer 2 sensor kinase/phosphatase LuxQ	EC2.7.13.3
Bovatus_03408	1.39	6.59	0.0689735	0.445292	ALJ48015.1	L-aspartate dehydrogenase	EC1.4.1.21
Bovatus_03729	-2.43	5.03	0.0831435	0.463697	ALJ48334.1	Glycosyl hydrolase family 98	Unknown	GH98-CBM35	Bovatus:81	Bovatus:73
Bovatus_00990	0.79	8.9	0.0282588	0.304192	ALJ45641.1	thiamine-phosphate pyrophosphorylase	EC2.5.1.3
Bovatus_03883	4.27	3.28	0.0812408	0.460714	ALJ48486.1	hypothetical protein	Unknown		Bovatus:87	Bovatus:80
Bovatus_03365	-3.58	3.56	0.083035	0.463697	ALJ47972.1	hypothetical protein	NOT DEFINED
Bovatus_03406	-3.2	0.59	0.0802921	0.45969	ALJ48013.1	hypothetical protein	Unknown
Bovatus_03733	0.95	7.48	0.0472974	0.384672	ALJ48338.1	Sensor histidine kinase TodS	Unknown		Bovatus:81	Bovatus:73
Bovatus_04928	0.91	7.48	0.0460591	0.381744	ALJ49515.1	Ribosomal RNA large subunit methyltransferase F	EC2.1.1.181		Bovatus:106
Bovatus_02468	-1.29	6.25	0.0700569	0.447298	ALJ47093.1	TonB-dependent Receptor Plug Domain protein	Unknown		Bovatus:44	Bovatus:8
Bovatus_04365	3.92	3.04	0.0813297	0.460714	ALJ48958.1	Pectinesterase A precursor	EC3.1.1.11	CE8	Bovatus:96	Bovatus:100
Bovatus_02591	-3.09	3.99	0.0843314	0.464001	ALJ47216.1	Cold shock-like protein CspC	NOT DEFINED
Bovatus_03099	2.43	5.22	0.0834464	0.463697	ALJ47707.1	hypothetical protein	Unknown
Bovatus_01178	-0.6	11.63	0.00853733	0.172605	ALJ45829.1	Polysaccharide biosynthesis protein	NOT DEFINED
Bovatus_00336	1.42	6.62	0.0690674	0.445292	ALJ45007.1	CAAX amino terminal protease self- immunity	NOT DEFINED
Bovatus_03741	-2.96	4.32	0.0856042	0.468161	ALJ48346.1	hypothetical protein	Unknown		Bovatus:81	Bovatus:73
Bovatus_03450	1.31	6.62	0.0631227	0.433221	ALJ48057.1	SusD family protein	NOT DEFINED		Bovatus:71	Bovatus:36
Bovatus_03016	0.59	9.24	0.0245917	0.288989	ALJ47625.1	CoA binding domain protein	NOT DEFINED			Bovatus:44
Bovatus_00089	-2.1	4.84	0.0840984	0.464001	ALJ44761.1	putative glycerophosphoryl diester phosphodiesterase 1	EC3.1.4.46		Bovatus:4	Bovatus:24
Bovatus_04876	-0.65	8.81	0.0280879	0.304092	ALJ49464.1	Beta-galactosidase	EC3.2.1.23	GH2	Bovatus:105	Bovatus:108
Bovatus_01750	-1.37	5.87	0.0689011	0.445292	ALJ46390.1	major facilitator superfamily transporter	Unknown
Bovatus_00670	-3.63	3.46	0.0842311	0.464001	ALJ45336.1	Fimbrillin-A associated anchor proteins Mfa1 and Mfa2	Unknown
Bovatus_00696	2.06	5.51	0.085074	0.46612	ALJ45362.1	RNA polymerase sigma factor CarQ	NOT DEFINED
Bovatus_02073	0.94	7.84	0.0428093	0.367334	ALJ46708.1	ECF RNA polymerase sigma factor SigW	NOT DEFINED
Bovatus_04212	3.72	1.52	0.084011	0.464001	ALJ48806.1	Murein DD-endopeptidase MepM	EC3.4.24.-
Bovatus_04050	-3.96	2.52	0.0835656	0.4637	ALJ48645.1	T-protein	EC1.3.1.12
Bovatus_03152	1.55	6.21	0.0737463	0.450775	ALJ47760.1	hypothetical protein	Unknown		Bovatus:57	Bovatus:51
Bovatus_01670	3.88	1.86	0.084209	0.464001	ALJ46313.1	hypothetical protein	Unknown
Bovatus_00425	3.69	3.03	0.0858055	0.468161	ALJ45093.1	Phage-related minor tail protein	Unknown
Bovatus_00769	3.56	3.02	0.0857855	0.468161	ALJ45431.1	ABC transporter ATP-binding protein YtrE	NOT DEFINED
Bovatus_00321	0.47	10.8	0.0126399	0.201005	ALJ44992.1	putative ABC transporter ATP-binding protein YheS	Unknown
Bovatus_00237	1.86	5.82	0.0812506	0.460714	ALJ44909.1	Phosphotransferase enzyme family protein	Unknown
Bovatus_03074	-3.73	3.08	0.087177	0.471696	ALJ47682.1	Beta-xylosidase	EC3.2.1.37|EC3.2.1.55	GH43_12	Bovatus:55	Bovatus:47
Bovatus_03336	3.49	3.61	0.0886956	0.476617	ALJ47943.1	hypothetical protein	Unknown
Bovatus_00540	2.9	5.06	0.0894893	0.478254	ALJ45207.1	Glutamate-pyruvate aminotransferase AlaC	EC2.6.1.83
Bovatus_02149	-4.15	2.24	0.0862779	0.470082	ALJ46783.1	Nicotinate-nucleotide--dimethylbenzimidazole phosphoribosyltransferase	EC2.4.2.21
Bovatus_04655	0.48	10.14	0.0179953	0.24086	ALJ49245.1	hypothetical protein	Unknown
Bovatus_02842	4.09	2.43	0.0865715	0.470699	ALJ47454.1	hypothetical protein	EC3.4.24.-
Bovatus_00281	4	2.71	0.0866317	0.470699	ALJ44953.1	hypothetical protein	EC1.17.99.6
Bovatus_04798	-1.65	6.38	0.0760994	0.457006	ALJ49386.1	recombinase A	NOT DEFINED
Bovatus_03280	-3.12	0.32	0.0877282	0.473369	ALJ47888.1	hypothetical protein	Unknown
Bovatus_04918	1.33	6.45	0.073694	0.450775	ALJ49506.1	hypothetical protein	Unknown
Bovatus_04793	-4.07	2.78	0.0871028	0.471696	ALJ49381.1	hypothetical protein	Unknown
Bovatus_03472	3.81	7.5	0.0813787	0.460714	ALJ48079.1	hypothetical protein	Unknown		Bovatus:73	Bovatus:37
Bovatus_00663	1.56	6.08	0.0805936	0.459929	ALJ45329.1	Magnesium-transporting ATPase, P-type 1	EC3.6.3.2
Bovatus_01692	-1.12	7.14	0.0618784	0.431417	ALJ46333.1	hypothetical protein	Unknown
Bovatus_00423	2.82	0.31	0.0896283	0.478344	ALJ45091.1	hypothetical protein	Unknown
Bovatus_00231	1.34	6.5	0.0724399	0.450775	ALJ44903.1	UDP-glucose 6-dehydrogenase TuaD	EC1.1.1.22
Bovatus_00773	-1.75	5.42	0.0827259	0.463697	ALJ45435.1	N-carbamoyl-D-amino acid hydrolase	EC3.5.1.53
Bovatus_01989	-3.51	0.9	0.0890226	0.477064	ALJ46624.1	hypothetical protein	NOT DEFINED
Bovatus_02904	-2.77	4.88	0.0922957	0.489242	ALJ47514.1	Alkyl hydroperoxide reductase subunit F	EC1.6.4.-
Bovatus_00414	2.91	4.79	0.0931823	0.492491	ALJ45082.1	Phage terminase large subunit	NOT DEFINED
Bovatus_03078	4.14	8.94	0.0487401	0.387181	ALJ47686.1	Arabinoxylan arabinofuranohydrolase precursor	NOT DEFINED	GH43_34	Bovatus:55	Bovatus:48
Bovatus_04071	3.8	1.88	0.0906991	0.483399	ALJ48666.1	Peptidoglycan-N-acetylglucosamine deacetylase	EC3.5.1.-	CE4
Bovatus_01464	1.04	7.89	0.0467076	0.383269	ALJ46108.1	fec operon regulator FecR	NOT DEFINED		Bovatus:18	Bovatus:13
Bovatus_01443	0.75	8.87	0.0322205	0.323762	ALJ46087.1	ribonuclease Z	EC2.5.1.105
Bovatus_02824	1.66	5.52	0.0886455	0.476617	ALJ47437.1	hypothetical protein	Unknown
Bovatus_01681	2.96	4.09	0.0958554	0.494903	ALJ46323.1	Non-motile and phage-resistance protein	EC2.1.1.80:EC3.1.1.61
Bovatus_03888	-3.72	1.44	0.0922589	0.489242	ALJ48491.1	Rhamnulose-1-phosphate aldolase	EC4.1.2.19
Bovatus_00703	3.03	4.83	0.0960204	0.494903	ALJ45369.1	Vitamin B12 transporter BtuB precursor	NOT DEFINED
Bovatus_02695	3.19	1.58	0.0951234	0.494903	ALJ47320.1	helix-turn-helix protein	Unknown
Bovatus_03964	1.05	7.62	0.0500394	0.390727	ALJ48561.1	hypothetical protein	Unknown
Bovatus_00011	2.61	4.62	0.0957147	0.494903	ALJ44683.1	hypothetical protein	Unknown
Bovatus_01771	-0.66	8.96	0.0299719	0.311161	ALJ46411.1	Glutaconyl-CoA decarboxylase subunit beta	EC4.1.1.3
Bovatus_00195	1.17	6.6	0.070604	0.448381	ALJ44867.1	hypothetical protein	EC3.2.1.31	GH141
Bovatus_00525	3.26	0.61	0.0948071	0.494903	ALJ45192.1	Heavy-metal-associated domain protein	EC3.6.3.3:EC3.6.3.5
Bovatus_03642	3.73	2.74	0.0952776	0.494903	ALJ48248.1	Beta-galactosidase	EC3.2.1.23	GH2
Bovatus_00135	1.07	7.44	0.052725	0.394603	ALJ44807.1	hypothetical protein	Unknown
Bovatus_04331	3.48	3.21	0.0973128	0.497389	ALJ48924.1	GDSL-like Lipase/Acylhydrolase	EC3.2.1.4		Bovatus:95	Bovatus:99
Bovatus_03571	-3.72	3.36	0.0973452	0.497389	ALJ48177.1	hypothetical protein	Unknown
Bovatus_01970	-3	3.47	0.0989838	0.500937	ALJ46605.1	hypothetical protein	Unknown
Bovatus_01995	-2.67	4.31	0.099368	0.501305	ALJ46630.1	hypothetical protein	Unknown
Bovatus_03256	-1.94	4.86	0.094586	0.494903	ALJ47864.1	Outer membrane protein OprM precursor	NOT DEFINED
Bovatus_02569	-3.81	3.6	0.0983027	0.499429	ALJ47194.1	hypothetical protein	EC3.2.1.51	GH95
Bovatus_01618	-3.94	2.86	0.0973927	0.497389	ALJ46262.1	hypothetical protein	Unknown
Bovatus_00486	3.37	0.84	0.0979087	0.498149	ALJ45153.1	hypothetical protein	Unknown
Bovatus_01872	-3.66	2.05	0.0978682	0.498149	ALJ46512.1	Thioredoxin	NOT DEFINED
Bovatus_02993	-2.37	4.99	0.0988226	0.500769	ALJ47602.1	Exo-beta-D-glucosaminidase precursor	EC3.2.1.165	GH2	Bovatus:53	Bovatus:44
Bovatus_00345	-3.21	0.76	0.0986166	0.500373	ALJ45014.1	hypothetical protein	Unknown
Bovatus_01648	-0.54	9.92	0.0210898	0.260263	ALJ46292.1	putative nicotinate-nucleotide pyrophosphorylase	EC2.4.2.19
Bovatus_00253	0.73	7.86	0.0434584	0.367986	ALJ44925.1	HEPN domain protein	NOT DEFINED
Bovatus_01135	-1.14	8.57	0.0346498	0.334222	ALJ45786.1	transcriptional activator RfaH	NOT DEFINED
Bovatus_03776	-1.83	5.63	0.0918079	0.487979	ALJ48381.1	Retaining alpha-galactosidase precursor	EC3.2.1.20	GH97
Bovatus_01753	2.25	5.3	0.0997366	0.502	ALJ46393.1	NMT1/THI5 like protein	NOT DEFINED
Bovatus_00262	-0.93	7.43	0.0521489	0.393233	ALJ44934.1	Sulfate adenylyltransferase subunit 2	EC2.7.7.4
Bovatus_04710	1.01	7.4	0.064756	0.437639	ALJ49299.1	hypothetical protein	NOT DEFINED
Bovatus_03199	3.21	1.08	0.100744	0.504198	ALJ47807.1	hypothetical protein	Unknown		Bovatus:60	Bovatus:54
Bovatus_02384	-3.33	0.8	0.101065	0.504198	ALJ47016.1	Oxygen regulatory protein NreC	NOT DEFINED
Bovatus_04351	2.98	0.83	0.1022	0.506085	ALJ48944.1	twin arginine translocase protein A	NOT DEFINED
Bovatus_04690	1.57	6.02	0.0933269	0.492491	ALJ49279.1	Susd and RagB outer membrane lipoprotein	Unknown		Bovatus:103	Bovatus:106
Bovatus_03217	3.2	4.34	0.104018	0.511205	ALJ47825.1	Alkaline phosphatase precursor	EC3.1.3.1
Bovatus_00161	-2.36	5.46	0.101508	0.505002	ALJ44833.1	hypothetical protein	Unknown
Bovatus_04871	1.84	5.87	0.0945151	0.494903	ALJ49459.1	Ktr system potassium uptake protein B	NOT DEFINED
Bovatus_00638	3.85	3.07	0.103464	0.510403	ALJ45304.1	Non-reducing end beta-L-arabinofuranosidase	NOT DEFINED	GH127
Bovatus_01460	2.07	5.49	0.102042	0.506085	ALJ46104.1	Exo-beta-D-glucosaminidase precursor	EC3.2.1.25	GH2	Bovatus:18	Bovatus:13
Bovatus_02433	2.56	5.06	0.105061	0.513105	ALJ47059.1	hypothetical protein	Unknown		Bovatus:42	Bovatus:60
Bovatus_03485	-1.36	6.4	0.0717222	0.449994	ALJ48092.1	ATP-dependent helicase HepA	EC2.7.11.1
Bovatus_03161	1.43	5.79	0.0849494	0.46609	ALJ47769.1	Alpha-galactosidase	EC3.2.1.22	GH36	Bovatus:58	Bovatus:52
Bovatus_00823	-3.31	4.21	0.106519	0.517002	ALJ45481.1	Inner membrane protein YhiM	Unknown
Bovatus_03183	0.69	8.64	0.0346886	0.334222	ALJ47791.1	Archaeal ATPase	NOT DEFINED
Bovatus_03388	3.77	1.86	0.105575	0.514974	ALJ47995.1	Cellobiose 2-epimerase	Unknown	GH76
Bovatus_03990	3.28	4.27	0.107306	0.518887	ALJ48585.1	hypothetical protein	EC3.4.21.96
Bovatus_02160	-2.23	4.9	0.102119	0.506085	ALJ46794.1	PKD domain protein	Unknown
Bovatus_04564	-0.79	7.83	0.0460122	0.381744	ALJ49155.1	Ribonuclease D	NOT DEFINED
Bovatus_01042	2.66	5.03	0.106225	0.516854	ALJ45693.1	hypothetical protein	Unknown
Bovatus_04631	-0.8	8.2	0.0414612	0.364226	ALJ49222.1	preprotein translocase subunit SecG	NOT DEFINED
Bovatus_02279	3.33	1.04	0.106512	0.517002	ALJ46912.1	Thioredoxin-1	NOT DEFINED
Bovatus_04736	-3.09	5.06	0.106718	0.517324	ALJ49325.1	Type-1 restriction enzyme R protein	EC3.1.21.3
Bovatus_02970	3.61	3.22	0.10814	0.520082	ALJ47579.1	site-specific tyrosine recombinase XerC	NOT DEFINED
Bovatus_01763	1.07	7.25	0.0593883	0.421694	ALJ46403.1	Beta-carbonic anhydrase 1	EC4.2.1.1
Bovatus_01835	1.83	5.61	0.101594	0.505002	ALJ46475.1	High-affinity Na(+)/H(+) antiporter NhaS3	Unknown
Bovatus_01410	-3.62	2.82	0.107602	0.519647	ALJ46056.1	Cell division ATP-binding protein FtsE	NOT DEFINED
Bovatus_02126	2.28	5.4	0.103827	0.510905	ALJ46760.1	Putative glycoside hydrolase	Unknown
Bovatus_04468	-3.13	1	0.108297	0.520082	ALJ49061.1	Nucleotidyltransferase domain protein	NOT DEFINED
Bovatus_02378	-3.47	3.64	0.11005	0.525154	ALJ47010.1	Threonine synthase	EC4.2.3.1
Bovatus_01321	-2.54	4.34	0.107728	0.519647	ALJ45967.1	Periplasmic beta-glucosidase precursor	EC3.2.1.21	GH16-GH3	Bovatus:17	Bovatus:10
Bovatus_02703	2.51	4.77	0.111095	0.527088	ALJ47328.1	putative DMT superfamily transporter inner membrane protein	NOT DEFINED
Bovatus_04684	3.15	0.62	0.110756	0.526461	ALJ49274.1	CDP-alcohol phosphatidyltransferase	EC2.7.8.5
Bovatus_00405	-3.67	1.71	0.110305	0.525592	ALJ45073.1	putative type I restriction enzymeP M protein	EC2.1.1.72
Bovatus_00557	3.36	1.65	0.111641	0.52734	ALJ45223.1	hypothetical protein	Unknown
Bovatus_04109	2.26	5.38	0.107947	0.520061	ALJ48704.1	Plant Basic Secretory Protein	Unknown		Bovatus:93
Bovatus_00444	-1.4	5.91	0.093538	0.492491	ALJ45112.1	hypothetical protein	Unknown
Bovatus_01445	3.44	2.6	0.113266	0.530655	ALJ46089.1	transcriptional activator FtrB	NOT DEFINED
Bovatus_04585	2.47	2.07	0.113869	0.532071	ALJ49176.1	hypothetical protein	Unknown
Bovatus_04372	-1.63	5.91	0.0941906	0.494607	ALJ48965.1	hypothetical protein	Unknown		Bovatus:96	Bovatus:100
Bovatus_04726	-3.71	1.78	0.113976	0.532071	ALJ49315.1	hypothetical protein	Unknown
Bovatus_00391	3.33	4.01	0.114992	0.534838	ALJ45059.1	hypothetical protein	Unknown
Bovatus_00226	3.62	2.13	0.114821	0.534738	ALJ44898.1	hypothetical protein	Unknown
Bovatus_02586	-2.87	3.36	0.115371	0.534975	ALJ47211.1	thiamine biosynthesis protein ThiF	Unknown
Bovatus_04349	3.06	0.8	0.11561	0.535226	ALJ48942.1	GSCFA family protein	Unknown
Bovatus_03156	3.55	2.87	0.116217	0.536145	ALJ47764.1	hypothetical protein	Unknown		Bovatus:58	Bovatus:52
Bovatus_00657	-1.39	6.08	0.0803006	0.45969	ALJ45323.1	Beta-galactosidase	EC3.2.1.23	GH137-GH2-CBM57	Bovatus:14
Bovatus_03566	3.7	2.95	0.116768	0.536145	ALJ48172.1	hypothetical protein	Unknown
Bovatus_00511	-1.33	6.65	0.0731126	0.450775	ALJ45178.1	D-3-phosphoglycerate dehydrogenase	EC1.1.1.95:EC1.1.1.399
Bovatus_00554	-3.63	2.5	0.116631	0.536145	ALJ45220.1	Major fimbrial subunit protein (FimA)	Unknown
Bovatus_04460	-1.32	6.6	0.0775086	0.457125	ALJ49053.1	hypothetical protein	NOT DEFINED
Bovatus_04081	-0.64	8.38	0.0407367	0.363726	ALJ48676.1	3-oxoacyl-[acyl-carrier-protein] synthase 1	EC2.3.1.41
Bovatus_02178	2.1	5.32	0.110673	0.526461	ALJ46812.1	hypothetical protein	Unknown
Bovatus_04660	3.46	2.16	0.117697	0.538517	ALJ49250.1	4Fe-4S binding domain protein	EC1.2.1.2
Bovatus_01728	-1.88	5.62	0.100151	0.50294	ALJ46369.1	Endo-1,4-beta-xylanase A precursor	EC3.2.1.8	GH10-CBM4-CBM4	Bovatus:26	Bovatus:93
Bovatus_04007	1.66	5.9	0.0973519	0.497389	ALJ48602.1	tRNA-specific 2-thiouridylase MnmA	EC2.8.1.13
Bovatus_03047	3.45	2.49	0.11877	0.541524	ALJ47655.1	Endoglucanase precursor	EC3.2.1.4	GH5_2	Bovatus:54	Bovatus:46
Bovatus_02479	-3.26	1.11	0.118379	0.540373	ALJ47104.1	N-6 DNA Methylase	EC2.1.1.72
Bovatus_03709	0.52	10.61	0.0167765	0.231758	ALJ48314.1	FKBP-type 22 kDa peptidyl-prolyl cis-trans isomerase	EC5.2.1.8
Bovatus_02041	0.65	8.72	0.0369702	0.347662	ALJ46676.1	Putative glycoside hydrolase	EC3.2.1.78
Bovatus_01262	-2.44	2.97	0.117479	0.538149	ALJ45913.1	2-dehydro-3-deoxygluconokinase	EC2.7.1.45
Bovatus_03154	-3.57	3.87	0.120588	0.543294	ALJ47762.1	hypothetical protein	EC3.1.1.53		Bovatus:58	Bovatus:52
Bovatus_03836	2.94	1.29	0.120652	0.543294	ALJ48441.1	recombination regulator RecX	NOT DEFINED
Bovatus_01278	-3.44	3.6	0.120815	0.543294	ALJ45929.1	Malate-2H(+)/Na(+)-lactate antiporter	Unknown
Bovatus_01434	3.41	3.6	0.12139	0.543785	ALJ46078.1	hypothetical protein	Unknown
Bovatus_01675	3.19	3.2	0.121441	0.543785	ALJ46317.1	hypothetical protein	Unknown
Bovatus_04815	2.61	4.75	0.119947	0.543294	ALJ49403.1	ATP-dependent helicase HepA	EC2.1.1.72
Bovatus_00041	3.22	3.8	0.122542	0.547244	ALJ44713.1	Alginate lyase	Unknown		Bovatus:3	Bovatus:25
Bovatus_00867	4.46	9.02	0.0661888	0.442617	ALJ45524.1	Ferrienterobactin receptor precursor	Unknown		Bovatus:15	Bovatus:45
Bovatus_02517	3.37	2.38	0.123545	0.551091	ALJ47142.1	hypothetical protein			Bovatus:45
Bovatus_02491	-2.72	0.38	0.124259	0.552387	ALJ47116.1	hypothetical protein	Unknown
Bovatus_01136	1.12	7.25	0.0692306	0.445445	ALJ45787.1	hypothetical protein	Unknown
Bovatus_01523	0.96	7.25	0.0712476	0.449994	ALJ46167.1	hypothetical protein	Unknown
Bovatus_04041	3.34	3.56	0.125166	0.5539	ALJ48636.1	ATP-dependent DNA helicase RecG	EC3.6.4.12
Bovatus_02633	1.21	6.73	0.083137	0.463697	ALJ47258.1	Nitrogen assimilation regulatory protein	NOT DEFINED
Bovatus_01188	3.46	2.29	0.125865	0.555008	ALJ45839.1	Calcineurin-like phosphoesterase	Unknown
Bovatus_04843	3.53	2.27	0.126112	0.555008	ALJ49431.1	Inner membrane protein YqjA	NOT DEFINED
Bovatus_04652	-1.62	6.12	0.104338	0.51156	ALJ49242.1	Peptidase C1-like family protein	EC3.4.22.40
Bovatus_01908	-1.08	6.89	0.0764141	0.457006	ALJ46548.1	ATP-dependent DNA helicase RecQ	EC3.6.4.12
Bovatus_04734	3.37	2.61	0.127494	0.557311	ALJ49323.1	EcoKI restriction-modification system protein HsdS	EC3.1.21.3
Bovatus_02240	2.23	5.3	0.118149	0.539953	ALJ46873.1	Oxygen-independent coproporphyrinogen-III oxidase 1	Unknown
Bovatus_00833	-3.67	1.68	0.127504	0.557311	ALJ45491.1	Succinyl-CoA ligase [ADP-forming] subunit alpha	EC6.2.1.5
Bovatus_04308	3.44	3.17	0.128299	0.557517	ALJ48901.1	HTH-type transcriptional activator Btr	Unknown
Bovatus_01421	-3.53	2.55	0.12864	0.557517	ALJ46065.1	fumarate/nitrate reduction transcriptional regulator	Unknown
Bovatus_01932	1.69	5.98	0.111157	0.527088	ALJ46567.1	NADP-dependent 7-alpha-hydroxysteroid dehydrogenase	EC1.1.1.100
Bovatus_02257	3.2	3.6	0.129042	0.557517	ALJ46890.1	DNA-binding transcriptional dual regulator Crp	EC2.7.11.1
Bovatus_04856	1.65	6.83	0.0941927	0.494607	ALJ49444.1	hypothetical protein	Unknown			Bovatus:107
Bovatus_00243	-0.94	7.13	0.0663241	0.442765	ALJ44915.1	Alpha-monoglucosyldiacylglycerol synthase	EC2.4.1.-	GT4
Bovatus_00983	2.65	4.34	0.128186	0.557517	ALJ45634.1	Signal transduction histidine-protein kinase BarA	EC2.7.13.3
Bovatus_02330	2.83	0.51	0.130992	0.560466	ALJ46963.1	hypothetical protein	Unknown
Bovatus_01036	2.46	4.94	0.129528	0.557517	ALJ45687.1	hypothetical protein	Unknown
Bovatus_03748	3.21	2.96	0.131068	0.560466	ALJ48353.1	muropeptide transporter	NOT DEFINED
Bovatus_04587	1.6	6.59	0.0959981	0.494903	ALJ49178.1	ATP-dependent RecD-like DNA helicase	NOT DEFINED
Bovatus_04573	2.69	4.94	0.126215	0.555008	ALJ49164.1	hypothetical protein	Unknown		Bovatus:100	Bovatus:103
Bovatus_03469	-3.02	0.84	0.131687	0.561563	ALJ48076.1	Acyl-coenzyme A thioesterase PaaI	EC3.1.2.-
Bovatus_00767	3.55	2.64	0.132502	0.561588	ALJ45429.1	hypothetical protein	Unknown
Bovatus_03030	-0.62	9.3	0.0309099	0.315537	ALJ47639.1	FKBP-type 22 kDa peptidyl-prolyl cis-trans isomerase	EC5.2.1.8
Bovatus_00128	2.64	0.48	0.133422	0.563659	ALJ44800.1	ECF RNA polymerase sigma factor SigR	NOT DEFINED
Bovatus_04199	-1.59	5.67	0.113553	0.531364	ALJ48793.1	Murein DD-endopeptidase MepM	NOT DEFINED	GH73
Bovatus_02341	2.21	5.07	0.120268	0.543294	ALJ46973.1	hypothetical protein
Bovatus_02365	0.56	9.72	0.026128	0.296268	ALJ46997.1	hypothetical protein	Unknown
Bovatus_00848	-2.67	4.16	0.132393	0.561588	ALJ45506.1	hypothetical protein	Unknown
Bovatus_01744	3.46	2.31	0.134729	0.565514	ALJ46384.1	Peptidase S46	Unknown			Bovatus:94
Bovatus_02161	2.09	5.3	0.12495	0.553572	ALJ46795.1	Multidrug export protein MepA	Unknown
Bovatus_01584	2.92	1.37	0.135336	0.566781	ALJ46228.1	site-specific tyrosine recombinase XerD	NOT DEFINED
Bovatus_04321	-0.81	8.04	0.048058	0.385422	ALJ48914.1	NADH-quinone oxidoreductase subunit C/D	EC1.6.5.3
Bovatus_01764	-3.61	2.88	0.13561	0.566781	ALJ46404.1	SusD family protein	NOT DEFINED		Bovatus:27	Bovatus:95
Bovatus_00669	2.36	5.17	0.128543	0.557517	ALJ45335.1	hypothetical protein	Unknown
Bovatus_03147	3.51	3.06	0.136238	0.568189	ALJ47755.1	hypothetical protein			Bovatus:57	Bovatus:51
Bovatus_03276	-3.4	2.45	0.136825	0.568217	ALJ47884.1	hypothetical protein	Unknown
Bovatus_02540	2.64	4.68	0.132787	0.561894	ALJ47165.1	Retaining alpha-galactosidase precursor	EC3.2.1.20	GH97	Bovatus:45
Bovatus_02021	-3	3.23	0.13664	0.568217	ALJ46656.1	ECF RNA polymerase sigma factor SigE	NOT DEFINED		Bovatus:32	Bovatus:1
Bovatus_01929	1.01	7.04	0.078564	0.457125	ALJ46564.1	hypothetical protein	Unknown
Bovatus_01833	3.12	3.72	0.137635	0.569765	ALJ46473.1	hypothetical protein	NOT DEFINED
Bovatus_04917	-3.1	1.22	0.139785	0.575169	ALJ49505.1	putative AAA-ATPase	Unknown
Bovatus_01982	3.31	2.29	0.140194	0.575486	ALJ46617.1	hypothetical protein	Unknown
Bovatus_04124	3.33	1.8	0.140713	0.576406	ALJ48718.1	hypothetical protein
Bovatus_00433	3.52	3.3	0.141586	0.57877	ALJ45101.1	hypothetical protein	Unknown
Bovatus_03265	2.5	5.17	0.134173	0.565514	ALJ47873.1	SusD family protein	NOT DEFINED		Bovatus:64	Bovatus:58
Bovatus_03229	2.07	4.91	0.132861	0.561894	ALJ47837.1	hypothetical protein	Unknown
Bovatus_03249	2.28	4.78	0.136702	0.568217	ALJ47857.1	hypothetical protein	Unknown		Bovatus:63	Bovatus:57
Bovatus_04607	-3.08	0.78	0.142558	0.579454	ALJ49198.1	RNA polymerase sigma factor CarQ	NOT DEFINED		Bovatus:102	Bovatus:105
Bovatus_00789	3.19	2.02	0.142747	0.579454	ALJ45449.1	hypothetical protein	Unknown
Bovatus_03918	1.79	5.72	0.124747	0.553299	ALJ48520.1	hypothetical protein	NOT DEFINED		Bovatus:89	Bovatus:82
Bovatus_03400	0.47	10.12	0.0230634	0.277349	ALJ48007.1	Vitamin B12 transporter BtuB	NOT DEFINED		Bovatus:68	Bovatus:16
Bovatus_02323	-3.25	1.88	0.143596	0.579454	ALJ46956.1	hypothetical protein	Unknown
Bovatus_01487	-2.71	3.86	0.143064	0.579454	ALJ46131.1	8-amino-7-oxononanoate synthase	EC2.3.1.47
Bovatus_00376	-3.02	1.49	0.144484	0.580905	ALJ45044.1	hypothetical protein	Unknown
Bovatus_03707	-3.19	3.22	0.144439	0.580905	ALJ48312.1	hypothetical protein	Unknown
Bovatus_03856	0.95	6.85	0.0821774	0.463225	ALJ48459.1	Alginate lyase	Unknown		Bovatus:85	Bovatus:78
Bovatus_04273	2.12	5.64	0.127366	0.557311	ALJ48867.1	F5/8 type C domain protein	Unknown		Bovatus:94	Bovatus:98
Bovatus_03055	2.96	4.05	0.14369	0.579454	ALJ47663.1	4-O-beta-D-mannosyl-D-glucose phosphorylase	EC2.4.1.281	GH130	Bovatus:54	Bovatus:46
Bovatus_02156	-1.63	6.05	0.100301	0.503048	ALJ46790.1	Aspartate/alanine antiporter	NOT DEFINED
Bovatus_01666	-3.12	1.66	0.145839	0.582945	ALJ46310.1	Cypemycin methyltransferase	EC2.1.1.222:EC2.1.1.64
Bovatus_00010	3.07	3.27	0.145665	0.582945	ALJ44682.1	putative oxidoreductase	EC1.1.1.346
Bovatus_03141	-1.56	6.28	0.114383	0.533333	ALJ47749.1	hypothetical protein	Unknown		Bovatus:57	Bovatus:50
Bovatus_02210	-3.42	2.91	0.146394	0.582945	ALJ46843.1	Tetratricopeptide repeat protein	EC2.5.1.63
Bovatus_03237	3.37	2.61	0.146866	0.582945	ALJ47845.1	hypothetical protein	Unknown		Bovatus:62	Bovatus:56
Bovatus_02576	-3.26	3.2	0.147109	0.582945	ALJ47201.1	hypothetical protein	Unknown
Bovatus_02944	2.37	4.63	0.137394	0.56937	ALJ47553.1	hypothetical protein	Unknown		Bovatus:52	Bovatus:43
Bovatus_04179	3.09	3.46	0.146969	0.582945	ALJ48773.1	Outer membrane protein 40 precursor	Unknown
Bovatus_04159	-3.36	2.75	0.147681	0.584156	ALJ48753.1	Relaxase/mobilization nuclease domain protein	Unknown
Bovatus_04255	-0.36	10.93	0.015109	0.218913	ALJ48849.1	Tyrosine recombinase XerD	NOT DEFINED
Bovatus_00872	-2.55	1.42	0.149911	0.585234	ALJ45529.1	Adaptive-response sensory-kinase SasA	EC2.7.13.3
Bovatus_03036	3.03	3.89	0.146317	0.582945	ALJ47644.1	ECF RNA polymerase sigma factor SigH	NOT DEFINED
Bovatus_04739	1.37	6.36	0.109148	0.523267	ALJ49328.1	Low molecular weight phosphotyrosine protein phosphatase	EC1.20.4.1
Bovatus_00284	1.13	6.43	0.111871	0.52734	ALJ44955.1	hypothetical protein
Bovatus_03648	3.21	4.12	0.149887	0.585234	ALJ48254.1	SusD family protein	NOT DEFINED		Bovatus:78	Bovatus:70
Bovatus_03966	0.79	8.25	0.0484604	0.386892	ALJ48563.1	Trigger factor	NOT DEFINED
Bovatus_01437	2.99	1.28	0.151451	0.585234	ALJ46081.1	FMN-dependent NADH-azoreductase	Unknown
Bovatus_03438	-1.05	6.54	0.0909236	0.483936	ALJ48045.1	hypothetical protein	Unknown
Bovatus_02616	-3.32	2.06	0.15278	0.587109	ALJ47241.1	transcriptional activator FtrA	NOT DEFINED
Bovatus_04149	3.14	2.74	0.151349	0.585234	ALJ48743.1	Helix-turn-helix domain protein	Unknown
Bovatus_04053	-3.3	1.74	0.153175	0.587312	ALJ48648.1	P-protein	EC4.2.1.51
Bovatus_02547	2.5	4.56	0.147226	0.582945	ALJ47172.1	Endo-beta-1,4-xylanase Xyn10C precursor	EC3.2.1.8	GH10	Bovatus:46	Bovatus:4
Bovatus_00469	3.18	1.22	0.154	0.587753	ALJ45137.1	Multidrug export protein MepA	NOT DEFINED
Bovatus_04720	2.53	0.45	0.153544	0.587312	ALJ49309.1	hypothetical protein	Unknown
Bovatus_04270	-0.89	7.03	0.0760636	0.457006	ALJ48864.1	hypothetical protein	Unknown	GH	Bovatus:94	Bovatus:98
Bovatus_02809	-1.16	6.3	0.096417	0.495641	ALJ47422.1	Aminopeptidase	EC3.4.11.9
Bovatus_02751	2.7	4.18	0.151993	0.585234	ALJ47369.1	hypothetical protein	EC2.1.2.5
Bovatus_04781	-0.77	8.65	0.0432875	0.367334	ALJ49369.1	hypothetical protein	Unknown
Bovatus_00083	-2.41	4.46	0.143362	0.579454	ALJ44755.1	hypothetical protein			Bovatus:4	Bovatus:24
Bovatus_02661	2.59	4.2	0.153426	0.587312	ALJ47286.1	RNA polymerase sigma factor CarQ	NOT DEFINED		Bovatus:47	Bovatus:30
Bovatus_03409	2.75	0.74	0.155159	0.590451	ALJ48016.1	hypothetical protein
Bovatus_02204	0.84	7.19	0.0729275	0.450775	ALJ46837.1	hypothetical protein	Unknown
Bovatus_00627	2.73	3.51	0.151873	0.585234	ALJ45293.1	Serpin (serine protease inhibitor)	NOT DEFINED			Bovatus:7
Bovatus_03517	2.53	4.02	0.148366	0.584776	ALJ48124.1	hypothetical protein	NOT DEFINED
Bovatus_01347	3.41	2.54	0.157028	0.592948	ALJ45993.1	hypothetical protein	Unknown
Bovatus_01456	3.01	1.87	0.157995	0.595781	ALJ46100.1	hypothetical protein	Unknown		Bovatus:18	Bovatus:13
Bovatus_01652	1.03	6.92	0.0868974	0.471488	ALJ46296.1	NADPH-dependent 7-cyano-7-deazaguanine reductase	EC1.7.1.13
Bovatus_02286	-1.87	5.11	0.129927	0.557929	ALJ46919.1	SusD family protein	NOT DEFINED		Bovatus:38	Bovatus:64
Bovatus_02439	-2.62	4.56	0.150265	0.585234	ALJ47065.1	Chitobiase precursor	EC3.2.1.52	GH20	Bovatus:43	Bovatus:59
Bovatus_02743	-2.78	0.92	0.159124	0.595781	ALJ47361.1	hypothetical protein	Unknown
Bovatus_03710	-2.81	0.72	0.160021	0.596759	ALJ48315.1	HTH-type transcriptional repressor CytR	NOT DEFINED
Bovatus_04608	2.45	4.75	0.151026	0.585234	ALJ49199.1	fec operon regulator FecR	Unknown		Bovatus:102	Bovatus:105
Bovatus_02602	2.55	0.58	0.160234	0.596848	ALJ47227.1	hypothetical protein	Unknown
Bovatus_00621	-2.89	3.34	0.159066	0.595781	ALJ45287.1	Outer membrane protein Omp28	Unknown		Bovatus:13	Bovatus:7
Bovatus_04657	2.84	3.68	0.159041	0.595781	ALJ49247.1	succinate dehydrogenase/fumarate reductase iron-sulfur subunit	EC1.8.98.1
Bovatus_02367	-3.04	1.25	0.162279	0.599267	ALJ46999.1	Multidrug export protein MepA	Unknown
Bovatus_02483	2.73	0.77	0.161883	0.599267	ALJ47108.1	hypothetical protein	Unknown
Bovatus_01291	3.38	2.98	0.161626	0.599267	ALJ45942.1	hypothetical protein	Unknown	GH	Bovatus:16	Bovatus:84
Bovatus_02340	2.47	4.65	0.158594	0.595781	ALJ46972.1	hypothetical protein	Unknown
Bovatus_00856	-2.59	2.89	0.161	0.598698	ALJ45514.1	hypothetical protein	Unknown
Bovatus_04752	3.09	3.33	0.163912	0.603222	ALJ49341.1	Efflux pump periplasmic linker BepF	NOT DEFINED
Bovatus_00946	-1.58	6.06	0.124444	0.552581	ALJ45603.1	Multidrug export protein MepA	Unknown
Bovatus_04236	-2.11	4.95	0.151898	0.585234	ALJ48830.1	hypothetical protein	Unknown
Bovatus_04187	-3.19	2.83	0.166025	0.604176	ALJ48781.1	Vitamin B12 transporter BtuB	NOT DEFINED
Bovatus_04583	-2.32	1.76	0.164335	0.603812	ALJ49174.1	hypothetical protein	Unknown
Bovatus_00700	-2.87	3.45	0.165264	0.604176	ALJ45366.1	Putative electron transport protein YccM	NOT DEFINED
Bovatus_01081	-1.9	5.16	0.142852	0.579454	ALJ45732.1	Divalent metal cation transporter MntH	NOT DEFINED
Bovatus_02427	-0.69	8.36	0.0479011	0.385422	ALJ47053.1	hypothetical protein
Bovatus_01804	1.73	5.69	0.146268	0.582945	ALJ46444.1	Heparin-sulfate lyase precursor	EC4.2.2.8	PL12_2	Bovatus:28	Bovatus:96
Bovatus_03196	1.51	7.32	0.0971056	0.497389	ALJ47804.1	TonB dependent receptor	Unknown		Bovatus:60	Bovatus:54
Bovatus_01095	-2.18	5.95	0.142365	0.579454	ALJ45746.1	Electron transport complex protein RnfC	NOT DEFINED
Bovatus_03502	-2.99	2.1	0.169063	0.61125	ALJ48109.1	Bifunctional IPC transferase and DIPP synthase	EC2.6.1.37
Bovatus_00485	3.22	2.5	0.168829	0.61125	ALJ45152.1	hypothetical protein	Unknown
Bovatus_01765	-1.04	6.95	0.0803015	0.45969	ALJ46405.1	TonB-dependent Receptor Plug Domain protein	NOT DEFINED		Bovatus:27	Bovatus:95
Bovatus_03515	2.93	3.08	0.161511	0.599267	ALJ48122.1	putative AAA-ATPase	Unknown
Bovatus_00413	2.75	1.09	0.17018	0.612746	ALJ45081.1	Terminase small subunit	NOT DEFINED
Bovatus_00513	1.4	6.29	0.128689	0.557517	ALJ45180.1	IMPACT family member YigZ	EC3.4.13.9
Bovatus_00303	3.1	2.71	0.167788	0.608329	ALJ44974.1	hypothetical protein	Unknown		Bovatus:9	Bovatus:34
Bovatus_02030	-0.37	11.32	0.0131811	0.204621	ALJ46665.1	Putative glycoside hydrolase	Unknown
Bovatus_03853	1.41	6.44	0.112137	0.527892	ALJ48456.1	Vitamin B12 transporter BtuB	Unknown		Bovatus:85	Bovatus:78
Bovatus_00963	2.78	3.84	0.171831	0.61426	ALJ45620.1	Cobalt-zinc-cadmium resistance protein CzcA	NOT DEFINED
Bovatus_00765	2.31	0.36	0.172831	0.615207	ALJ45427.1	ECF RNA polymerase sigma factor SigH
Bovatus_03561	1.92	4.39	0.150689	0.585234	ALJ48167.1	Major fimbrial subunit protein (FimA)	Unknown
Bovatus_03301	0.75	8.75	0.0491582	0.387757	ALJ47909.1	Tetratricopeptide repeat protein	Unknown
Bovatus_02154	2.47	4.5	0.164621	0.603812	ALJ46788.1	Hemin transport system permease protein HmuU	NOT DEFINED
Bovatus_01999	-2.9	1.26	0.175653	0.619729	ALJ46634.1	Cation efflux system protein CusC precursor	NOT DEFINED
Bovatus_04665	-1.88	5.14	0.153677	0.587312	ALJ49255.1	Copper homeostasis protein CutC	NOT DEFINED
Bovatus_03782	-3.16	2.64	0.177309	0.622649	ALJ48387.1	Glycosyl hydrolases family 43	EC3.2.1.23	GH43_24
Bovatus_01823	2.3	4.88	0.156015	0.591141	ALJ46463.1	Fructosamine kinase FrlD	EC2.7.1.4			Bovatus:97
Bovatus_00148	1.61	6.14	0.129155	0.557517	ALJ44820.1	Efflux pump periplasmic linker BepF	NOT DEFINED
Bovatus_04787	-0.47	10.05	0.0256478	0.294104	ALJ49375.1	hypothetical protein	EC2.7.1.24
Bovatus_03318	3.16	2.43	0.178974	0.625688	ALJ47925.1	hypothetical protein	Unknown
Bovatus_01243	3.05	1.7	0.178623	0.625019	ALJ45894.1	Iron import ATP-binding/permease protein IrtA	NOT DEFINED
Bovatus_00206	1.69	5.79	0.15005	0.585234	ALJ44878.1	hypothetical protein	NOT DEFINED	GH146
Bovatus_03722	1.39	7.52	0.0828007	0.463697	ALJ48327.1	TonB dependent receptor	Unknown		Bovatus:81	Bovatus:73
Bovatus_02063	0.58	9.56	0.0324424	0.323762	ALJ46698.1	Polar-differentiation response regulator DivK	NOT DEFINED
Bovatus_03064	2.1	5.31	0.149826	0.585234	ALJ47672.1	Thermostable beta-glucosidase B	EC3.2.1.21	GH3	Bovatus:55	Bovatus:47
Bovatus_02997	-0.54	8.74	0.0431323	0.367334	ALJ47606.1	hypothetical protein	Unknown		Bovatus:53	Bovatus:44
Bovatus_01413	-2.79	1.56	0.180939	0.629745	ALJ46059.1	1-(5-phosphoribosyl)-5-[(5- phosphoribosylamino)methylideneamino] imidazole-4-carboxamide isomerase	EC5.3.1.16
Bovatus_04421	-2.7	2.64	0.180374	0.628338	ALJ49014.1	Rhamnogalacturonan exolyase YesX	EC4.2.2.23	PL11_1	Bovatus:97	Bovatus:101
Bovatus_03189	3.12	2.01	0.183283	0.633761	ALJ47797.1	Arylsulfatase	EC3.1.6.-		Bovatus:60	Bovatus:54
Bovatus_00295	2.85	4.17	0.175934	0.620047	ALJ44966.1	Calcineurin-like phosphoesterase	Unknown		Bovatus:8	Bovatus:33
Bovatus_02528	-1.59	5.59	0.139736	0.575169	ALJ47153.1	Alpha-galactosidase A precursor	EC3.2.1.22	GH27	Bovatus:45
Bovatus_02284	-1	7.05	0.0889214	0.477064	ALJ46917.1	fec operon regulator FecR	Unknown		Bovatus:38	Bovatus:64
Bovatus_03898	-3.19	2.41	0.184532	0.636027	ALJ48501.1	hypothetical protein	Unknown	GH	Bovatus:88	Bovatus:81
Bovatus_00470	0.65	8.7	0.046736	0.383269	ALJ45138.1	Acetylxylan esterase precursor	EC3.2.1.51
Bovatus_02272	2.75	1.28	0.187029	0.640242	ALJ46905.1	ATPase RavA	EC3.6.3.-
Bovatus_03001	2.22	5.49	0.152202	0.585463	ALJ47610.1	IPT/TIG domain protein	EC2.7.11.1		Bovatus:53	Bovatus:44
Bovatus_01863	2.97	3.27	0.180027	0.628246	ALJ46503.1	hypothetical protein	Unknown
Bovatus_04526	-2.04	4.79	0.164844	0.603812	ALJ49117.1	Carboxy-terminal processing protease CtpB precursor	EC3.4.21.102
Bovatus_04075	0.83	7.07	0.0875318	0.472962	ALJ48670.1	3-oxoacyl-[acyl-carrier-protein] synthase 2	EC2.3.1.41
Bovatus_04205	2.52	4.7	0.179354	0.626457	ALJ48799.1	hypothetical protein	Unknown
Bovatus_00064	-3.15	2.43	0.189903	0.643376	ALJ44736.1	hypothetical protein	Unknown
Bovatus_00871	-2.09	1.85	0.187815	0.641296	ALJ45528.1	Transcriptional regulatory protein DevR (DosR)	NOT DEFINED
Bovatus_02861	3.05	2.65	0.188713	0.641296	ALJ47473.1	hypothetical protein	Unknown
Bovatus_01159	2.28	0.14	0.188865	0.641296	ALJ45810.1	KilA-N domain protein	Unknown
Bovatus_01533	2.95	2.27	0.187789	0.641296	ALJ46177.1	hypothetical protein
Bovatus_00096	-2.08	5.72	0.159163	0.595781	ALJ44768.1	Histidinol dehydrogenase	EC1.1.1.23
Bovatus_04229	1.68	6.01	0.148619	0.584776	ALJ48823.1	hypothetical protein	Unknown
Bovatus_03210	2.66	1.94	0.192785	0.649853	ALJ47818.1	Ribosome-binding ATPase YchF	NOT DEFINED
Bovatus_00687	-2.53	0.81	0.192851	0.649853	ALJ45353.1	hypothetical protein	Unknown
Bovatus_02875	-2.73	1.35	0.193586	0.65073	ALJ47485.1	ECF RNA polymerase sigma factor SigL	NOT DEFINED		Bovatus:49	Bovatus:39
Bovatus_04405	2.29	5.17	0.164789	0.603812	ALJ48998.1	hypothetical protein	Unknown		Bovatus:97	Bovatus:101
Bovatus_01388	-0.79	8.2	0.0595028	0.421694	ALJ46034.1	Chain length determinant protein	Unknown
Bovatus_04112	2.37	4.32	0.178421	0.624874	ALJ48707.1	Sensory transduction protein LytR	NOT DEFINED
Bovatus_01551	-2.98	3.27	0.196328	0.653347	ALJ46195.1	Macrolide export protein MacA	NOT DEFINED
Bovatus_01142	-1.61	4.76	0.159301	0.595781	ALJ45793.1	putative L-ascorbate-6-phosphate lactonase UlaG	EC3.1.4.54
Bovatus_04137	-2.83	3.1	0.197683	0.654179	ALJ48731.1	Ribosomal RNA small subunit methyltransferase D	EC2.1.1.171
Bovatus_02465	-1.67	5.63	0.156395	0.591141	ALJ47090.1	hypothetical protein	Unknown		Bovatus:44	Bovatus:8
Bovatus_04893	3.07	3.4	0.194269	0.652125	ALJ49481.1	UDP-glucoseundecaprenyl-phosphate glucose-1-phosphate transferase	NOT DEFINED
Bovatus_03570	2.76	3.66	0.18376	0.634484	ALJ48176.1	hypothetical protein	Unknown
Bovatus_04719	2.41	0.62	0.196776	0.653347	ALJ49308.1	inner membrane protein	NOT DEFINED
Bovatus_03800	1.82	5.69	0.148694	0.584776	ALJ48405.1	Beta-galactosidase	EC3.2.1.23	GH2	Bovatus:82	Bovatus:75
Bovatus_04601	-0.82	7.49	0.0766965	0.457006	ALJ49192.1	TonB dependent receptor	NOT DEFINED		Bovatus:101	Bovatus:104
Bovatus_00744	1.7	5.85	0.155316	0.590472	ALJ45409.1	NTE family protein RssA	NOT DEFINED
Bovatus_01423	-2.9	2.22	0.200534	0.656162	ALJ46067.1	phosphoglycolate phosphatase	EC3.1.3.104
Bovatus_02817	1.85	5.33	0.159136	0.595781	ALJ47430.1	Low molecular weight protein-tyrosine-phosphatase YfkJ	EC3.1.3.48
Bovatus_00668	1.81	5.36	0.162685	0.599267	ALJ45334.1	Outer membrane protein 41 precursor	Unknown
Bovatus_04931	-2.62	3.58	0.192551	0.649853	ALJ49518.1	hypothetical protein	EC3.2.2.21
Bovatus_00824	2.8	4.3	0.190118	0.643376	ALJ45482.1	(R)-stereoselective amidase	Unknown
Bovatus_00248	-2.27	4.59	0.174656	0.61801	ALJ44920.1	hypothetical protein	Unknown	GT4
Bovatus_01985	-2.93	1.41	0.202204	0.656806	ALJ46620.1	hypothetical protein	Unknown		Bovatus:30
Bovatus_00101	2.01	5.63	0.164469	0.603812	ALJ44773.1	TonB-dependent Receptor Plug Domain protein	NOT DEFINED		Bovatus:5	Bovatus:23
Bovatus_00863	-2.48	0.67	0.20127	0.656162	ALJ45520.1	hypothetical protein
Bovatus_00024	2.73	2.87	0.199091	0.656144	ALJ44696.1	3-oxoadipate enol-lactonase 2	EC3.1.1.24		Bovatus:1	Bovatus:27
Bovatus_03091	3	2.09	0.201445	0.656162	ALJ47699.1	hypothetical protein	Unknown
Bovatus_02062	0.61	8.77	0.0464031	0.383269	ALJ46697.1	Starch-binding associating with outer membrane	NOT DEFINED		Bovatus:33	Bovatus:12
Bovatus_03281	2.17	0.3	0.201369	0.656162	ALJ47889.1	Bacterial DNA-binding protein	NOT DEFINED
Bovatus_00690	-0.69	8.64	0.048011	0.385422	ALJ45356.1	Alpha-D-glucose-1-phosphate phosphatase YihX	EC3.1.3.104
Bovatus_02599	2.5	1	0.205348	0.660648	ALJ47224.1	putative AAA-ATPase	Unknown
Bovatus_04465	1.13	6.39	0.134723	0.565514	ALJ49058.1	MG2 domain protein	Unknown
Bovatus_04557	2.75	2.2	0.202917	0.658219	ALJ49148.1	hypothetical protein	Unknown
Bovatus_01893	-2.44	0.54	0.206358	0.661156	ALJ46533.1	hypothetical protein
Bovatus_03514	-0.78	7.5	0.0751646	0.455176	ALJ48121.1	hypothetical protein	Unknown
Bovatus_02059	-2.58	1.12	0.206821	0.661198	ALJ46694.1	Ribose-5-phosphate isomerase A	EC5.3.1.6
Bovatus_00477	-2.86	2.78	0.206878	0.661198	ALJ45144.1	Poly-beta-1,6-N-acetyl-D-glucosamine synthase	EC2.4.1.212	GT2
Bovatus_03069	2.64	3.91	0.205725	0.660648	ALJ47677.1	IPT/TIG domain protein	Unknown		Bovatus:55	Bovatus:47
Bovatus_01040	2.94	2.38	0.209731	0.664884	ALJ45691.1	hypothetical protein	Unknown
Bovatus_00603	-2.56	4.09	0.198255	0.654491	ALJ45269.1	Putative DNA ligase-like protein	EC6.5.1.1			Bovatus:86
Bovatus_00421	2.83	1.5	0.208491	0.663643	ALJ45089.1	hypothetical protein	Unknown
Bovatus_03116	1.63	5.45	0.15422	0.588022	ALJ47724.1	Fasciclin domain protein	NOT DEFINED		Bovatus:56	Bovatus:49
Bovatus_03382	-1.09	6.68	0.101163	0.504198	ALJ47989.1	Peptidase S46	Unknown
Bovatus_02151	-2.31	4.14	0.1976	0.654179	ALJ46785.1	Phosphoserine phosphatase 1	EC3.1.3.73
Bovatus_02261	3.01	2.59	0.209516	0.664884	ALJ46894.1	Acetyltransferase (GNAT) family protein	Unknown
Bovatus_02594	-1.96	5.25	0.176407	0.621155	ALJ47219.1	hypothetical protein	Unknown
Bovatus_03040	1.31	6.12	0.151961	0.585234	ALJ47648.1	D-alanyl-D-alanine dipeptidase	EC3.4.13.22
Bovatus_01110	3.14	2.85	0.212155	0.669856	ALJ45761.1	coenzyme F420-reducing hydrogenase subunit beta	EC1.12.98.1
Bovatus_04791	-2.8	2.33	0.212726	0.671116	ALJ49379.1	HTH-type transcriptional regulator CysL	NOT DEFINED
Bovatus_02536	1.62	6.18	0.14842	0.584776	ALJ47161.1	Xylan 1,4-beta-xylosidase precursor	EC3.2.1.21	GH3	Bovatus:45
Bovatus_01778	1.87	5.49	0.177558	0.622966	ALJ46418.1	Multidrug resistance protein MexB	NOT DEFINED
Bovatus_02380	-3.02	2.38	0.216679	0.677349	ALJ47012.1	Bifunctional aspartokinase/homoserine dehydrogenase 1	EC2.7.2.4:EC1.1.1.3
Bovatus_04956	-2.73	2.11	0.217271	0.677349	ALJ49543.1	fec operon regulator FecR	Unknown		Bovatus:108	Bovatus:111
Bovatus_01993	2.27	4.61	0.197709	0.654179	ALJ46628.1	NUMOD4 motif protein	Unknown
Bovatus_03108	0.81	7.36	0.0963511	0.495641	ALJ47716.1	hypothetical protein	Unknown		Bovatus:56	Bovatus:49
Bovatus_02137	2.5	4.6	0.201114	0.656162	ALJ46771.1	SusD family protein	NOT DEFINED		Bovatus:35	Bovatus:68
Bovatus_03751	1.11	6.55	0.11162	0.52734	ALJ48356.1	Sodium/glucose cotransporter	NOT DEFINED
Bovatus_01148	-0.67	7.98	0.0637315	0.43587	ALJ45799.1	UvrABC system protein A	NOT DEFINED
Bovatus_01725	2.42	0.92	0.219222	0.677349	ALJ46366.1	Endo-1,4-beta-xylanase A precursor	EC3.2.1.8	GH10	Bovatus:26	Bovatus:93
Bovatus_02982	-2.67	4.54	0.201258	0.656162	ALJ47591.1	hypothetical protein	Unknown
Bovatus_03662	2.39	0.79	0.218117	0.677349	ALJ48268.1	Thiol-disulfide oxidoreductase ResA	Unknown
Bovatus_04914	2.56	1.46	0.214869	0.675696	ALJ49502.1	UDP-glucose 4-epimerase	EC5.1.3.26
Bovatus_01588	2.87	2.2	0.220858	0.678779	ALJ46232.1	hypothetical protein	Unknown
Bovatus_02417	2.28	0.48	0.218091	0.677349	ALJ47048.1	Potassium-transporting ATPase C chain	EC3.6.3.12
Bovatus_02936	1.04	6.69	0.102721	0.507378	ALJ47545.1	Beta-glucuronidase	EC3.2.1.31	GH2	Bovatus:52	Bovatus:43
Bovatus_00832	-2.41	4.51	0.196906	0.653347	ALJ45490.1	Succinyl-CoA ligase [ADP-forming] subunit beta	EC6.2.1.5
Bovatus_01503	-2.53	3.74	0.211618	0.669241	ALJ46147.1	RNA-splicing ligase RtcB	EC6.5.1.3
Bovatus_02657	2.38	0.58	0.219361	0.677349	ALJ47282.1	hypothetical protein	Unknown
Bovatus_02864	-1.27	6.38	0.128739	0.557517	ALJ47476.1	Signal transduction histidine-protein kinase BarA	EC2.1.1.80:EC3.1.1.61
Bovatus_01678	2.08	5.43	0.187064	0.640242	ALJ46320.1	4Fe-4S binding domain protein	EC2.1.1.228
Bovatus_04430	-2.7	2.39	0.221236	0.678779	ALJ49023.1	Rhamnogalacturonan acetylesterase RhgT	NOT DEFINED	CE12
Bovatus_01240	1.49	5.87	0.153436	0.587312	ALJ45891.1	Cytochrome c biogenesis protein CcsA	Unknown
Bovatus_04901	-2.17	0.99	0.221575	0.678779	ALJ49489.1	hypothetical protein	Unknown
Bovatus_04689	-2.82	3.29	0.218474	0.677349	ALJ49278.1	Ferrienterobactin receptor precursor	NOT DEFINED		Bovatus:103	Bovatus:106
Bovatus_03253	2.22	0.59	0.224366	0.684513	ALJ47861.1	DNA-binding transcriptional regulator AraC	NOT DEFINED
Bovatus_00400	0.75	7.93	0.0717382	0.449994	ALJ45068.1	hypothetical protein	Unknown
Bovatus_01669	2.37	0.66	0.224383	0.684513	ALJ46312.1	EamA-like transporter family protein	NOT DEFINED
Bovatus_01293	-2.96	2.11	0.229511	0.684513	ALJ45944.1	Endo-beta-N-acetylglucosaminidase H precursor	EC3.2.1.96	GH	Bovatus:16	Bovatus:84
Bovatus_04152	2.9	3.17	0.227958	0.684513	ALJ48746.1	Tyrosine recombinase XerC	Unknown
Bovatus_04497	0.74	8.33	0.0642812	0.437639	ALJ49090.1	hypothetical protein	NOT DEFINED
Bovatus_04681	-2.12	0.52	0.226039	0.684513	ALJ49271.1	ECF RNA polymerase sigma factor SigW	NOT DEFINED
Bovatus_03158	1.6	5.72	0.166867	0.605551	ALJ47766.1	TonB dependent receptor	Unknown		Bovatus:58	Bovatus:52
Bovatus_03039	2.97	2.65	0.230446	0.684513	ALJ47647.1	hypothetical protein	Unknown
Bovatus_04442	-2.62	2	0.232859	0.686321	ALJ49035.1	hypothetical protein	Unknown		Bovatus:99	Bovatus:102
Bovatus_00808	0.72	8.09	0.0683315	0.445292	ALJ45466.1	Putative metallo-hydrolase YycJ	Unknown
Bovatus_04771	-2.94	3.04	0.23039	0.684513	ALJ49359.1	Peptidase family M23	Unknown
Bovatus_04806	2.8	2.83	0.229164	0.684513	ALJ49394.1	Helix-turn-helix domain protein	Unknown
Bovatus_03732	-1.9	4.9	0.195319	0.653347	ALJ48337.1	Arabinoxylan arabinofuranohydrolase precursor	EC3.2.1.55	GH43_29-CBM6	Bovatus:81	Bovatus:73
Bovatus_02995	1.11	6.5	0.129452	0.557517	ALJ47604.1	Exo-beta-D-glucosaminidase precursor	EC3.2.1.165	GH2	Bovatus:53	Bovatus:44
Bovatus_00482	1.15	6.36	0.147093	0.582945	ALJ45149.1	hypothetical protein	Unknown	GT101
Bovatus_04826	2.74	3.03	0.229215	0.684513	ALJ49414.1	The GLUG motif protein	Unknown
Bovatus_04402	2.61	2.72	0.236368	0.688199	ALJ48995.1	Beta-galactosidase	EC3.2.1.23	GH42	Bovatus:97	Bovatus:101
Bovatus_02166	-1.59	5.78	0.169021	0.61125	ALJ46800.1	Cellobiose 2-epimerase	Unknown	GH76	Bovatus:36	Bovatus:67
Bovatus_02925	2.61	1.44	0.233417	0.686373	ALJ47534.1	4-O-beta-D-mannosyl-D-glucose phosphorylase	EC2.4.1.281	GH130	Bovatus:52	Bovatus:42
Bovatus_01480	1.75	5.9	0.170688	0.612746	ALJ46124.1	hypothetical protein	Unknown
Bovatus_04105	-2.71	1.21	0.238128	0.691066	ALJ48700.1	hypothetical protein	Unknown		Bovatus:93	Bovatus:22
Bovatus_01098	0.94	6.88	0.104548	0.511879	ALJ45749.1	hypothetical protein
Bovatus_04699	1.49	5.79	0.171936	0.61426	ALJ49288.1	hypothetical protein	EC3.2.2.27
Bovatus_03004	2.33	6.58	0.181967	0.632043	ALJ47613.1	Unsaturated rhamnogalacturonyl hydrolase YteR	EC3.2.1.172	GH105	Bovatus:53	Bovatus:44
Bovatus_03235	1.25	6.22	0.138545	0.572563	ALJ47843.1	hypothetical protein	Unknown		Bovatus:62	Bovatus:56
Bovatus_04180	-1.81	5.52	0.183965	0.63463	ALJ48774.1	hypothetical protein	Unknown
Bovatus_04606	2.68	3.19	0.234873	0.687741	ALJ49197.1	Alpha-N-acetylglucosaminidase (NAGLU) tim-barrel domain protein	EC3.2.1.50	GH89	Bovatus:101	Bovatus:104
Bovatus_00928	-0.79	8.75	0.0518198	0.393233	ALJ45585.1	ATP synthase subunit delta	NOT DEFINED
Bovatus_00697	2.53	1.37	0.239853	0.6935	ALJ45363.1	fec operon regulator FecR	Unknown
Bovatus_01372	-1.45	5.95	0.159766	0.596471	ALJ46018.1	D-inositol 3-phosphate glycosyltransferase	EC2.4.-.-	GT4
Bovatus_00662	2.78	2.95	0.241966	0.694837	ALJ45328.1	Signal transduction histidine-protein kinase ArlS	EC2.7.13.3
Bovatus_04865	-1.95	4.88	0.219723	0.677349	ALJ49453.1	SusD family protein	NOT DEFINED		Bovatus:104	Bovatus:107
Bovatus_02619	-0.5	9.25	0.0403482	0.363726	ALJ47244.1	Modification methylase AplI	EC2.1.1.37
Bovatus_03873	-2.05	5.42	0.185289	0.638073	ALJ48476.1	Acetylornithine/acetyl-lysine aminotransferase	EC2.6.1.11:EC2.6.1.17
Bovatus_04415	-2.55	3.96	0.231612	0.685895	ALJ49008.1	SusD family protein	NOT DEFINED		Bovatus:97	Bovatus:101
Bovatus_01358	2.63	3.73	0.227526	0.684513	ALJ46004.1	CHAT domain protein	Unknown
Bovatus_02581	2.72	2.04	0.243683	0.694837	ALJ47206.1	hypothetical protein	Unknown
Bovatus_02012	2.69	1.6	0.243975	0.694837	ALJ46647.1	N,N'-diacetylchitobiase precursor		GH20
Bovatus_01953	2.35	3.71	0.227873	0.684513	ALJ46588.1	Calcineurin-like phosphoesterase superfamily domain protein	NOT DEFINED
Bovatus_00591	-2.62	3.54	0.231885	0.68602	ALJ45257.1	hypothetical protein	EC4.2.2.2	PL1_2	Bovatus:12	Bovatus:86
Bovatus_03689	-0.79	8.35	0.0570922	0.412527	ALJ48294.1	hypothetical protein	Unknown		Bovatus:80	Bovatus:72
Bovatus_01063	-2.44	0.9	0.240045	0.693543	ALJ45714.1	hypothetical protein	Unknown
Bovatus_02554	1.36	6.69	0.126409	0.555008	ALJ47179.1	Sensor histidine kinase TodS	Unknown		Bovatus:46	Bovatus:4
Bovatus_04753	-1.26	5.66	0.149976	0.585234	ALJ49342.1	outer membrane channel protein	NOT DEFINED
Bovatus_01490	2.61	2.51	0.244388	0.694837	ALJ46134.1	ATP-dependent dethiobiotin synthetase BioD 1	EC6.3.3.3
Bovatus_04341	-2.67	2.39	0.24944	0.696509	ALJ48934.1	hypothetical protein	Unknown		Bovatus:95	Bovatus:99
Bovatus_02561	-2.09	0.48	0.241005	0.694263	ALJ47186.1	hypothetical protein
Bovatus_03492	2.4	3.81	0.232189	0.68602	ALJ48099.1	Phosphoribosylglycinamide formyltransferase	EC2.1.2.2
Bovatus_00733	-2.06	0.73	0.244434	0.694837	ALJ45398.1	von Willebrand factor type A domain protein	NOT DEFINED
Bovatus_03058	2.35	1.07	0.246098	0.694837	ALJ47666.1	hypothetical protein	Unknown		Bovatus:54	Bovatus:46
Bovatus_04927	2.76	2.52	0.246185	0.694837	ALJ49514.1	Response regulator protein VraR	NOT DEFINED		Bovatus:106
Bovatus_01519	-2.6	2.47	0.245855	0.694837	ALJ46163.1	hypothetical protein	Unknown
Bovatus_03518	0.59	8.48	0.0577828	0.415526	ALJ48125.1	Archaeal ATPase	NOT DEFINED
Bovatus_04275	1.97	4.61	0.224808	0.684513	ALJ48869.1	Glycosyl hydrolase family 92	Unknown	GH92	Bovatus:94	Bovatus:98
Bovatus_02299	2.41	2.18	0.243938	0.694837	ALJ46932.1	hypothetical protein	Unknown
Bovatus_00509	-2.14	4.3	0.233528	0.686373	ALJ45176.1	ATP-dependent RNA helicase DbpA	EC3.6.4.13
Bovatus_00916	1.12	6.86	0.112337	0.528201	ALJ45573.1	hypothetical protein	Unknown
Bovatus_00070	-2.79	3.18	0.248432	0.696509	ALJ44742.1	Yip1 domain protein	Unknown
Bovatus_02157	-2.41	4.54	0.235608	0.688199	ALJ46791.1	Vitamin B12 transporter BtuB precursor	NOT DEFINED
Bovatus_03919	-2.59	2.89	0.254133	0.701837	ALJ48521.1	hypothetical protein	Unknown
Bovatus_03473	0.95	7.26	0.101175	0.504198	ALJ48080.1	TonB dependent receptor	NOT DEFINED		Bovatus:73	Bovatus:37
Bovatus_04555	-2	2.42	0.245715	0.694837	ALJ49146.1	tRNA dimethylallyltransferase	EC2.5.1.75
Bovatus_01777	2.16	4.53	0.229589	0.684513	ALJ46417.1	Solvent efflux pump periplasmic linker SrpA precursor	NOT DEFINED
Bovatus_03418	2.09	5.42	0.203153	0.658439	ALJ48025.1	Chitobiase precursor	EC3.2.1.52	GH20	Bovatus:69	Bovatus:17
Bovatus_03220	-2.19	4.58	0.223888	0.684257	ALJ47828.1	HEPN domain protein	NOT DEFINED
Bovatus_00088	-2.66	1.49	0.25664	0.704545	ALJ44760.1	hypothetical protein	Unknown		Bovatus:4	Bovatus:24
Bovatus_04892	-1.93	5.02	0.212911	0.671159	ALJ49480.1	Chain length determinant protein	Unknown
Bovatus_02086	2.04	4.05	0.227394	0.684513	ALJ46721.1	hypothetical protein	Unknown		Bovatus:34	Bovatus:11
Bovatus_02622	1.02	6.55	0.126128	0.555008	ALJ47247.1	hypothetical protein	Unknown
Bovatus_00327	1.86	0.54	0.250736	0.697407	ALJ44998.1	Bacterial DNA-binding protein	Unknown
Bovatus_04427	-2.47	4.54	0.232356	0.68602	ALJ49020.1	hypothetical protein	NOT DEFINED
Bovatus_02383	-1.11	6.58	0.136075	0.568115	ALJ47015.1	dihydrolipoamide dehydrogenase	NOT DEFINED
Bovatus_01374	-1.63	5.82	0.169657	0.612266	ALJ46020.1	Glycosyl transferase family 11	EC2.4.1.308	GT11
Bovatus_00896	-1.47	6.15	0.175685	0.619729	ALJ45553.1	F420H2 dehydrogenase subunit F	EC1.12.98.1
Bovatus_01515	-2.37	3.39	0.251401	0.697998	ALJ46159.1	Helix-turn-helix domain protein	Unknown
Bovatus_00881	0.65	8.89	0.0518574	0.393233	ALJ45538.1	putative AAA-ATPase	Unknown
Bovatus_00637	-2.61	2.56	0.260661	0.708621	ALJ45303.1	Phage protein Gp37/Gp68	Unknown
Bovatus_02905	2.4	2.63	0.246024	0.694837	ALJ47515.1	Alkyl hydroperoxide reductase subunit C	EC1.11.1.15
Bovatus_02475	-2.08	0.42	0.254874	0.701837	ALJ47100.1	hypothetical protein	Unknown
Bovatus_03443	2.01	5.29	0.202314	0.656806	ALJ48050.1	Chondroitin sulfate ABC exolyase precursor	EC4.2.2.20:EC4.2.2.21	PL8_2
Bovatus_00827	-2.15	3.6	0.249344	0.696509	ALJ45485.1	Xylose isomerase	EC5.3.1.5
Bovatus_01281	2.35	1	0.25781	0.705776	ALJ45932.1	L-fucose isomerase	EC5.3.1.25:EC5.3.1.3
Bovatus_02351	-2.53	2.33	0.262665	0.712089	ALJ46983.1	Signal transduction histidine-protein kinase BarA	EC2.1.1.80:EC3.1.1.61
Bovatus_02977	-2.37	3.6	0.24827	0.696509	ALJ47586.1	hypothetical protein	Unknown
Bovatus_00661	-2.45	1.82	0.262494	0.712089	ALJ45327.1	Transcriptional regulatory protein CusR	NOT DEFINED
Bovatus_04841	-2.6	2.28	0.265168	0.715899	ALJ49429.1	Low-affinity inorganic phosphate transporter 1	NOT DEFINED
Bovatus_03139	2.15	5.14	0.222811	0.681497	ALJ47747.1	hypothetical protein	Unknown		Bovatus:57	Bovatus:50
Bovatus_01166	-1.85	4.89	0.203938	0.659359	ALJ45817.1	Outer membrane efflux protein	Unknown
Bovatus_02264	-1.63	5.03	0.199843	0.656162	ALJ46897.1	hypothetical protein
Bovatus_02068	2.26	3.35	0.232724	0.686321	ALJ46703.1	Outer membrane efflux protein	NOT DEFINED
Bovatus_03187	-1.59	5.34	0.186232	0.639071	ALJ47795.1	Arylsulfatase	EC3.1.6.1		Bovatus:60	Bovatus:54
Bovatus_02048	2.04	4.27	0.238887	0.691728	ALJ46683.1	Arylsulfatase	EC3.1.6.8
Bovatus_01896	1.1	6.56	0.135519	0.566781	ALJ46536.1	2-iminoacetate synthase	EC4.1.99.19
Bovatus_02489	2.13	4.37	0.236255	0.688199	ALJ47114.1	hypothetical protein	Unknown
Bovatus_02881	-2.35	2.78	0.2558	0.703677	ALJ47491.1	hypothetical protein	Unknown		Bovatus:49	Bovatus:39
Bovatus_04717	-2.11	0.59	0.259743	0.708087	ALJ49306.1	Choloylglycine hydrolase	EC3.5.1.24
Bovatus_00199	-2.18	3.99	0.245817	0.694837	ALJ44871.1	Sodium/glucose cotransporter	NOT DEFINED
Bovatus_03313	2.25	4.38	0.22984	0.684513	ALJ47920.1	SusD family protein	NOT DEFINED		Bovatus:65	Bovatus:2
Bovatus_02924	1.1	6.92	0.131831	0.561563	ALJ47533.1	Inner membrane symporter YicJ	NOT DEFINED		Bovatus:52	Bovatus:42
Bovatus_03124	2.5	2.43	0.268734	0.716042	ALJ47732.1	Polygalacturonase	NOT DEFINED	GH28	Bovatus:56	Bovatus:49
Bovatus_04319	1.34	6.3	0.166843	0.605551	ALJ48912.1	NADH-quinone oxidoreductase subunit I	EC1.6.5.3
Bovatus_03889	-1.88	5.42	0.200505	0.656162	ALJ48492.1	Lactaldehyde reductase	EC1.1.1.77
Bovatus_03111	-2.41	1.43	0.271573	0.716042	ALJ47719.1	hypothetical protein	Unknown		Bovatus:56	Bovatus:49
Bovatus_01743	1.16	6.17	0.165633	0.604176	ALJ46383.1	hypothetical protein	Unknown			Bovatus:94
Bovatus_01436	-2.58	1.92	0.269139	0.716042	ALJ46080.1	Inner membrane transport protein YdhP	NOT DEFINED
Bovatus_04274	1.78	5.65	0.192801	0.649853	ALJ48868.1	Glycosyl hydrolase family 92	Unknown	GH92	Bovatus:94	Bovatus:98
Bovatus_04768	-2.41	3.46	0.257424	0.705706	ALJ49356.1	Serine/threonine-protein kinase B	NOT DEFINED
Bovatus_02049	2.68	2.05	0.272197	0.716042	ALJ46684.1	Arylsulfatase precursor	EC3.1.6.1
Bovatus_01187	2.23	2.64	0.249055	0.696509	ALJ45838.1	site-specific tyrosine recombinase XerC	NOT DEFINED
Bovatus_04584	-1.8	5.08	0.220459	0.678548	ALJ49175.1	PD-(D/E)XK nuclease family transposase	Unknown
Bovatus_02505	-2.6	2.84	0.270622	0.716042	ALJ47130.1	Xylosidase/arabinosidase	EC3.2.1.55	GH43_1	Bovatus:45
Bovatus_01647	-1.84	0.7	0.266295	0.716042	ALJ46291.1	ECF RNA polymerase sigma factor SigW	NOT DEFINED
Bovatus_02534	-1.94	4.79	0.217676	0.677349	ALJ47159.1	IPT/TIG domain protein	Unknown		Bovatus:45	Bovatus:5
Bovatus_02705	-2.61	2.62	0.275403	0.718525	ALJ47330.1	Glutamate decarboxylase	EC4.1.1.15
Bovatus_02242	-2.32	3.31	0.260592	0.708621	ALJ46875.1	hypothetical protein	Unknown			Bovatus:66
Bovatus_03766	-2.17	1.14	0.268639	0.716042	ALJ48371.1	Helix-hairpin-helix motif protein	NOT DEFINED
Bovatus_02635	-2.03	3	0.247579	0.696509	ALJ47260.1	MarR family protein	Unknown
Bovatus_00030	-1.42	5.58	0.197952	0.654179	ALJ44702.1	SusD family protein	NOT DEFINED		Bovatus:2	Bovatus:26
Bovatus_02653	2.58	2.9	0.273222	0.716042	ALJ47278.1	hypothetical protein	Unknown
Bovatus_04696	-2.08	1.38	0.272225	0.716042	ALJ49285.1	Divergent AAA domain protein	EC3.6.4.12
Bovatus_01247	-2.24	1.73	0.268882	0.716042	ALJ45898.1	hypothetical protein	Unknown
Bovatus_03129	-2.63	3.54	0.262384	0.712089	ALJ47737.1	hypothetical protein	NOT DEFINED
Bovatus_00964	2.49	2.43	0.268272	0.716042	ALJ45621.1	Cobalt-zinc-cadmium resistance protein CzcB	NOT DEFINED
Bovatus_03948	-2.32	0.79	0.271272	0.716042	ALJ48550.1	bacterioferritin	EC1.16.3.1
Bovatus_00893	1.06	6.35	0.134542	0.565514	ALJ45550.1	Spore coat protein SA	NOT DEFINED	GT4
Bovatus_02731	2.41	2.42	0.269623	0.716042	ALJ47349.1	L-glyceraldehyde 3-phosphate reductase	EC1.1.1.-			Bovatus:19
Bovatus_03043	2.55	3.38	0.269602	0.716042	ALJ47651.1	hypothetical protein	Unknown
Bovatus_03190	2.24	4.52	0.250089	0.697326	ALJ47798.1	Extracellular exo-alpha-L-arabinofuranosidase precursor	EC3.2.1.55	GH51	Bovatus:60	Bovatus:54
Bovatus_04224	2.48	2.92	0.27374	0.716042	ALJ48818.1	Chromosome-partitioning protein Spo0J	NOT DEFINED
Bovatus_01441	2.52	2.3	0.277846	0.721736	ALJ46085.1	hypothetical protein	NOT DEFINED
Bovatus_03698	2.16	1.02	0.270536	0.716042	ALJ48303.1	N-acetylglucosamine-6-phosphate deacetylase	EC3.5.1.25	CE9	Bovatus:80	Bovatus:72
Bovatus_03631	-1.34	5.49	0.18585	0.638879	ALJ48237.1	SusD family protein	NOT DEFINED		Bovatus:77	Bovatus:69
Bovatus_00819	-2.6	3.76	0.272706	0.716042	ALJ45477.1	hypothetical protein	Unknown
Bovatus_02891	1.49	5.91	0.183359	0.633761	ALJ47501.1	ADP-ribosylglycohydrolase	Unknown		Bovatus:50	Bovatus:40
Bovatus_01727	-2.71	3.62	0.274589	0.717564	ALJ46368.1	Glycosyl hydrolases family 2, sugar binding domain	EC3.1.1.53		Bovatus:26	Bovatus:93
Bovatus_01952	2.47	3.39	0.263689	0.713877	ALJ46587.1	Polyphosphate kinase	EC2.7.4.1
Bovatus_01207	-2.25	4.11	0.248956	0.696509	ALJ45858.1	Polyphosphate kinase	EC2.7.4.1
Bovatus_02758	-1.96	0.29	0.273081	0.716042	ALJ47376.1	50S ribosomal protein L17	NOT DEFINED
Bovatus_02071	-2.4	1.86	0.27866	0.721932	ALJ46706.1	Ribosomal RNA small subunit methyltransferase F	EC2.1.1.178
Bovatus_00652	-1.72	0.27	0.270169	0.716042	ALJ45318.1	hypothetical protein	NOT DEFINED		Bovatus:14	Bovatus:6
Bovatus_02515	0.8	7.55	0.0934977	0.492491	ALJ47140.1	Beta-glucuronidase	EC3.2.1.31	GH2	Bovatus:45
Bovatus_01280	-0.46	10.41	0.0257115	0.294104	ALJ45931.1	Mannosyl-D-glycerate transport/metabolism system repressor MngR	NOT DEFINED
Bovatus_03788	-2.15	4.84	0.241816	0.694837	ALJ48393.1	Antiholin-like protein LrgA	NOT DEFINED
Bovatus_04101	-2.61	2.81	0.280237	0.723623	ALJ48696.1	Calpain family cysteine protease	EC3.2.1.51		Bovatus:93	Bovatus:22
Bovatus_02260	2.15	4.21	0.247671	0.696509	ALJ46893.1	SusD family protein	NOT DEFINED		Bovatus:37	Bovatus:65
Bovatus_03663	-1.32	6.64	0.14007	0.575486	ALJ48269.1	Acetylornithine deacetylase	EC3.5.1.16
Bovatus_01339	2.22	3.66	0.272937	0.716042	ALJ45985.1	hypothetical protein	NOT DEFINED
Bovatus_03006	-1.02	6.8	0.112544	0.528536	ALJ47615.1	hypothetical protein	Unknown	GH115	Bovatus:53	Bovatus:44
Bovatus_03246	1.59	5.37	0.200132	0.656162	ALJ47854.1	Heparinase II/III-like protein	Unknown	PL	Bovatus:63	Bovatus:57
Bovatus_03439	1.06	6.83	0.134309	0.565514	ALJ48046.1	Poly-beta-1,6-N-acetyl-D-glucosamine synthase	EC2.4.-.-	GT2
Bovatus_00394	-2.45	1.85	0.289175	0.731744	ALJ45062.1	hypothetical protein	Unknown
Bovatus_04013	-0.56	7.94	0.0700013	0.447298	ALJ48608.1	tRNA (guanine-N(7)-)-methyltransferase	EC2.1.1.33
Bovatus_02849	0.99	7.02	0.128046	0.557517	ALJ47461.1	Chromate transport protein	NOT DEFINED
Bovatus_00870	2.09	2.41	0.270525	0.716042	ALJ45527.1	p-aminobenzoyl-glutamate transport protein	NOT DEFINED
Bovatus_04992	0.88	7.64	0.0957396	0.494903	ALJ49577.1	hypothetical protein	Unknown		Bovatus:109	Bovatus:112
Bovatus_00219	1.99	0.99	0.285498	0.728759	ALJ44891.1	transcriptional activator RfaH	NOT DEFINED
Bovatus_02596	2.19	0.8	0.28672	0.728759	ALJ47221.1	Oxygen regulatory protein NreC	NOT DEFINED
Bovatus_04624	-2.14	3.06	0.254397	0.701837	ALJ49215.1	Tetratricopeptide repeat protein	NOT DEFINED
Bovatus_04188	2.17	1.18	0.290969	0.731744	ALJ48782.1	Glutamine cyclotransferase	Unknown
Bovatus_02287	-1.83	5.11	0.21945	0.677349	ALJ46920.1	Arylsulfatase	EC3.1.6.1		Bovatus:38	Bovatus:64
Bovatus_00499	0.63	8.56	0.0634006	0.434366	ALJ45166.1	Outer membrane protein assembly factor BamA	Unknown
Bovatus_00630	2.13	0.79	0.292325	0.731744	ALJ45296.1	hypothetical protein	Unknown
Bovatus_01671	-1.57	5.89	0.193124	0.650174	ALJ46314.1	Sensor protein EvgS precursor	EC2.1.1.80:EC3.1.1.61
Bovatus_01701	-2.36	1.89	0.295317	0.732937	ALJ46342.1	Choline-sulfatase	EC3.1.6.-		Bovatus:24	Bovatus:91
Bovatus_03106	-1.95	4.29	0.22901	0.684513	ALJ47714.1	putative rhamnogalacturonan acetylesterase YesY	EC3.2.1.99	CE12-CE12	Bovatus:56	Bovatus:49
Bovatus_03096	2.28	4.19	0.281215	0.72519	ALJ47704.1	hypothetical protein	Unknown
Bovatus_00478	1.46	5.41	0.212144	0.669856	ALJ45145.1	hypothetical protein	Unknown
Bovatus_00587	-1.81	0.18	0.2912	0.731744	ALJ45253.1	Xylose isomerase-like TIM barrel	Unknown		Bovatus:12
Bovatus_00173	-2.01	0.84	0.294328	0.731744	ALJ44845.1	Unsaturated chondroitin disaccharide hydrolase	EC3.2.1.180	GH88	Bovatus:6	Bovatus:31
Bovatus_01105	-0.69	7.71	0.0828131	0.463697	ALJ45756.1	hypothetical protein	Unknown
Bovatus_00468	-0.46	9.97	0.0333566	0.327867	ALJ45136.1	Peptidoglycan-binding protein ArfA	NOT DEFINED
Bovatus_03610	1.49	5.77	0.196411	0.653347	ALJ48216.1	hypothetical protein	NOT DEFINED			Bovatus:35
Bovatus_02311	-2.38	3.43	0.286647	0.728759	ALJ46944.1	SusD family protein	NOT DEFINED		Bovatus:39	Bovatus:63
Bovatus_00084	2.34	3.63	0.267569	0.716042	ALJ44756.1	TonB dependent receptor	NOT DEFINED		Bovatus:4	Bovatus:24
Bovatus_01355	1.63	5.03	0.219073	0.677349	ALJ46001.1	Enamine/imine deaminase	EC3.5.99.10
Bovatus_00166	2.04	0.89	0.294367	0.731744	ALJ44838.1	hypothetical protein	Unknown		Bovatus:6	Bovatus:31
Bovatus_00981	2	3.99	0.252711	0.69982	ALJ45632.1	hypothetical protein	Unknown
Bovatus_03643	1.29	5.77	0.200586	0.656162	ALJ48249.1	Extracellular exo-alpha-(1->5)-L-arabinofuranosidase precursor	Unknown	GH43_26
Bovatus_00901	2.32	2.18	0.30606	0.740386	ALJ45558.1	hypothetical protein	Unknown
Bovatus_00956	2.1	1.03	0.296381	0.733289	ALJ45613.1	hypothetical protein
Bovatus_03638	2.43	2.06	0.298544	0.733344	ALJ48244.1	Arylsulfatase precursor	EC3.1.6.12
Bovatus_04582	-0.9	6.86	0.121829	0.54468	ALJ49173.1	Glutamine synthetase	EC6.3.1.2
Bovatus_02747	-0.67	8.04	0.0736499	0.450775	ALJ47365.1	HTH-type transcriptional repressor KstR2	NOT DEFINED
Bovatus_00658	-1.62	4.75	0.23316	0.686321	ALJ45324.1	Thiol-disulfide oxidoreductase ResA	Unknown		Bovatus:14
Bovatus_00240	1	6.79	0.142184	0.579454	ALJ44912.1	O-Antigen ligase	Unknown
Bovatus_04337	0.87	7.4	0.104682	0.511895	ALJ48930.1	TonB dependent receptor	Unknown		Bovatus:95	Bovatus:99
Bovatus_02590	2.21	0.99	0.305203	0.740206	ALJ47215.1	hypothetical protein	Unknown
Bovatus_01895	2.37	2.99	0.288922	0.731744	ALJ46535.1	Biotin synthase	EC2.8.1.6
Bovatus_00105	-1.34	6.23	0.170326	0.612746	ALJ44777.1	Leucine Rich repeats (2 copies)	NOT DEFINED		Bovatus:5	Bovatus:23
Bovatus_02612	-2.24	2.11	0.311301	0.742464	ALJ47237.1	Fimbrillin-A associated anchor proteins Mfa1 and Mfa2	Unknown
Bovatus_00252	-2	0.55	0.30208	0.737088	ALJ44924.1	Nucleotidyltransferase domain protein	NOT DEFINED
Bovatus_02694	2.39	3.41	0.30838	0.74185	ALJ47319.1	putative AAA-ATPase	Unknown
Bovatus_01125	1.84	4.57	0.250651	0.697407	ALJ45776.1	Diaminopimelate decarboxylase	EC4.1.1.20
Bovatus_02289	1.85	0.44	0.298144	0.733344	ALJ46922.1	hypothetical protein	Unknown		Bovatus:38	Bovatus:64
Bovatus_04030	1.67	5.31	0.213264	0.671731	ALJ48625.1	Alpha-N-acetylglucosaminidase (NAGLU) tim-barrel domain protein	EC3.2.1.50	GH89	Bovatus:91	Bovatus:20
Bovatus_04658	2.24	3.57	0.291833	0.731744	ALJ49248.1	NADH dehydrogenase subunit I	EC1.8.98.1
Bovatus_01366	2.27	2.38	0.310492	0.742464	ALJ46012.1	hypothetical protein	Unknown
Bovatus_03567	-2.09	4.05	0.294162	0.731744	ALJ48173.1	site-specific tyrosine recombinase XerC	NOT DEFINED
Bovatus_00492	1.75	0.33	0.303587	0.737789	ALJ45159.1	N-acetylmuramoyl-L-alanine amidase	EC3.5.1.28
Bovatus_02553	2.27	2.36	0.315082	0.74452	ALJ47178.1	hypothetical protein			Bovatus:46	Bovatus:4
Bovatus_00718	-0.84	7.72	0.0787651	0.457165	ALJ45383.1	hypothetical protein	Unknown
Bovatus_01029	2.07	4.1	0.283176	0.728327	ALJ45680.1	flagellar rod assembly protein/muramidase FlgJ	Unknown	GH
Bovatus_02441	2.26	2.86	0.30692	0.740386	ALJ47067.1	hypothetical protein	Unknown		Bovatus:43	Bovatus:59
Bovatus_01020	2.05	1.16	0.311852	0.742464	ALJ45671.1	hypothetical protein	Unknown
Bovatus_04946	2.56	2.96	0.296195	0.733289	ALJ49533.1	hypothetical protein	Unknown		Bovatus:107	Bovatus:110
Bovatus_00013	2.03	3.73	0.292926	0.731744	ALJ44685.1	hypothetical protein	Unknown
Bovatus_01470	2.28	2.14	0.315675	0.74452	ALJ46114.1	oxidative stress defense protein	NOT DEFINED
Bovatus_00203	-2.45	3.16	0.311729	0.742464	ALJ44875.1	Ribose-5-phosphate isomerase B	EC5.3.1.6
Bovatus_03429	1.17	5.81	0.208062	0.663435	ALJ48036.1	Divergent AAA domain protein	EC3.6.4.12
Bovatus_04656	-2.04	1.28	0.317905	0.746933	ALJ49246.1	succinate dehydrogenase iron-sulfur subunit	EC1.8.98.1
Bovatus_00407	-2.13	4.34	0.285749	0.728759	ALJ45075.1	hypothetical protein	Unknown
Bovatus_04810	-2.18	3.79	0.273824	0.716042	ALJ49398.1	Relaxase/mobilization nuclease domain protein	Unknown
Bovatus_04943	2.46	3.19	0.301315	0.736254	ALJ49530.1	Susd and RagB outer membrane lipoprotein	Unknown		Bovatus:107	Bovatus:110
Bovatus_03809	-2.19	3.32	0.284209	0.728759	ALJ48414.1	Cyclomaltodextrinase	EC3.2.1.135	GH13	Bovatus:83	Bovatus:76
Bovatus_01645	-2	0.8	0.319414	0.748653	ALJ46289.1	hypothetical protein	Unknown
Bovatus_04848	-2.23	1.52	0.321971	0.751522	ALJ49436.1	fec operon regulator FecR	NOT DEFINED
Bovatus_01506	2.19	3.4	0.300224	0.734965	ALJ46150.1	diadenosine tetraphosphatase	Unknown		Bovatus:20	Bovatus:87
Bovatus_04630	-2.31	2.65	0.325524	0.755134	ALJ49221.1	hypothetical protein	Unknown
Bovatus_00857	-1.82	1.19	0.31535	0.74452	ALJ45515.1	hypothetical protein	EC4.1.3.38
Bovatus_04099	-0.82	7.18	0.110078	0.525154	ALJ48694.1	Alpha-xylosidase	EC3.2.1.20	GH31	Bovatus:93	Bovatus:22
Bovatus_04812	2.22	1.74	0.313985	0.74452	ALJ49400.1	Putative DNA-invertase from lambdoid prophage Rac	NOT DEFINED
Bovatus_01822	-2.37	3.01	0.320903	0.750199	ALJ46462.1	Sensor histidine kinase TmoS	Unknown			Bovatus:97
Bovatus_03038	-1.69	5.05	0.235909	0.688199	ALJ47646.1	hypothetical protein	Unknown
Bovatus_00939	-1.37	6.29	0.162533	0.599267	ALJ45596.1	hypothetical protein	Unknown
Bovatus_01433	-1.7	0.91	0.314368	0.74452	ALJ46077.1	hypothetical protein	Unknown
Bovatus_04023	2.2	2.14	0.328241	0.758369	ALJ48618.1	hypothetical protein
Bovatus_04072	2.17	4.29	0.307191	0.740386	ALJ48667.1	hypothetical protein	EC2.3.1.179
Bovatus_03319	-1.12	6.32	0.159791	0.596471	ALJ47926.1	hypothetical protein	Unknown
Bovatus_02629	0.48	10.03	0.0347005	0.334222	ALJ47254.1	hypothetical protein	Unknown
Bovatus_03012	1.64	0.2	0.315926	0.74452	ALJ47621.1	hypothetical protein	Unknown			Bovatus:44
Bovatus_02268	2.38	3.91	0.29958	0.73431	ALJ46901.1	hypothetical protein	Unknown
Bovatus_00324	-1.24	5.94	0.196785	0.653347	ALJ44995.1	hypothetical protein	NOT DEFINED
Bovatus_01006	1.87	0.9	0.321021	0.750199	ALJ45657.1	hypothetical protein	Unknown
Bovatus_01289	-2.13	4.01	0.314923	0.74452	ALJ45940.1	TonB dependent receptor			Bovatus:16	Bovatus:84
Bovatus_01328	-2.08	3.78	0.316638	0.745298	ALJ45974.1	Clostripain precursor	EC3.4.22.8
Bovatus_03465	1.05	6.49	0.143816	0.579454	ALJ48072.1	hypothetical protein	Unknown
Bovatus_00968	-1.83	5.06	0.278486	0.721932	ALJ45625.1	N-acetylglucosamine-6-phosphate deacetylase	EC3.5.1.25	CE9
Bovatus_01859	0.99	7.05	0.13083	0.560466	ALJ46499.1	Acryloyl-CoA reductase electron transfer subunit gamma	NOT DEFINED
Bovatus_00567	-0.41	10.67	0.0248823	0.289701	ALJ45233.1	fec operon regulator FecR	NOT DEFINED		Bovatus:11	Bovatus:85
Bovatus_04245	2.22	3.9	0.283081	0.728327	ALJ48839.1	AAA-like domain protein	NOT DEFINED
Bovatus_01255	2.09	2.46	0.327755	0.758369	ALJ45906.1	hypothetical protein	Unknown
Bovatus_02816	1.03	6.29	0.172429	0.6145	ALJ47429.1	hypothetical protein	NOT DEFINED
Bovatus_01829	-1.2	5.64	0.213899	0.673187	ALJ46469.1	SusD family protein	NOT DEFINED		Bovatus:29	Bovatus:97
Bovatus_00596	2.34	2.6	0.331005	0.762551	ALJ45262.1	Polygalacturonase	EC3.2.1.67	GH28	Bovatus:12	Bovatus:86
Bovatus_00465	0.99	7.01	0.129118	0.557517	ALJ45133.1	LemA family protein	NOT DEFINED
Bovatus_03806	2.23	2.32	0.337778	0.765331	ALJ48411.1	SusD family protein	NOT DEFINED		Bovatus:83	Bovatus:76
Bovatus_00119	0.73	7.89	0.0834421	0.463697	ALJ44791.1	Anaerobic sulfatase-maturating enzyme	NOT DEFINED
Bovatus_04599	2.1	1.57	0.337379	0.765287	ALJ49190.1	ECF RNA polymerase sigma-E factor	NOT DEFINED		Bovatus:101	Bovatus:104
Bovatus_01102	1.65	0.23	0.329362	0.760155	ALJ45753.1	hypothetical protein	Unknown
Bovatus_02110	2.13	4.22	0.293865	0.731744	ALJ46744.1	Vitamin B12 transporter BtuB precursor	NOT DEFINED
Bovatus_04276	-1.48	6.22	0.210175	0.665753	ALJ48870.1	fec operon regulator FecR	Unknown		Bovatus:94	Bovatus:98
Bovatus_00620	1.81	4.92	0.256487	0.704545	ALJ45286.1	Outer membrane protein Omp28	Unknown		Bovatus:13	Bovatus:7
Bovatus_02471	-2.4	2.8	0.343143	0.769341	ALJ47096.1	hypothetical protein	Unknown
Bovatus_01856	2.29	2.33	0.339625	0.765331	ALJ46496.1	hypothetical protein	Unknown
Bovatus_03917	1.87	5.04	0.284967	0.728759	ALJ48519.1	SusD family protein	NOT DEFINED		Bovatus:89	Bovatus:82
Bovatus_02589	-2.16	1.9	0.348292	0.771165	ALJ47214.1	Helix-turn-helix domain protein	Unknown
Bovatus_01555	2.17	1.9	0.329574	0.760197	ALJ46199.1	putative inner membrane protein	Unknown
Bovatus_02901	1.03	6.06	0.183389	0.633761	ALJ47511.1	TonB dependent receptor	NOT DEFINED		Bovatus:51	Bovatus:41
Bovatus_02539	2	1.8	0.339517	0.765331	ALJ47164.1	Arabinoxylan arabinofuranohydrolase precursor	EC3.2.1.55	GH43_29-CBM6	Bovatus:45
Bovatus_01033	1.95	1.64	0.34269	0.769341	ALJ45684.1	TraX protein	Unknown
Bovatus_02850	2.06	1.25	0.343305	0.769341	ALJ47462.1	Chromate transport protein	NOT DEFINED
Bovatus_01130	1.64	0.34	0.337219	0.765287	ALJ45781.1	hypothetical protein
Bovatus_02583	-1.8	1.37	0.343471	0.769341	ALJ47208.1	hypothetical protein	Unknown
Bovatus_00044	2.16	1.59	0.344355	0.769341	ALJ44716.1	Thiol-disulfide oxidoreductase ResA	Unknown		Bovatus:3	Bovatus:25
Bovatus_01751	-0.97	6.71	0.139823	0.575169	ALJ46391.1	Endonuclease III	EC4.2.99.18
Bovatus_00479	-1.89	1.35	0.344182	0.769341	ALJ45146.1	N-glycosyltransferase	EC2.4.1.-	GT2
Bovatus_04805	-2	2.49	0.359282	0.778108	ALJ49393.1	Tyrosine recombinase XerC	NOT DEFINED
Bovatus_00310	-2.2	3.73	0.319084	0.748628	ALJ44981.1	Sialidase precursor	EC3.2.1.18	GH33	Bovatus:10	Bovatus:9
Bovatus_00439	-1.99	1.6	0.356589	0.777612	ALJ45107.1	N-acetylmuramoyl-l-alanine amidase I	EC3.5.1.28
Bovatus_04813	2.01	3.91	0.302501	0.737088	ALJ49401.1	hypothetical protein	EC2.1.1.72
Bovatus_01494	1.78	4.43	0.29546	0.732937	ALJ46138.1	putative propionyl-CoA carboxylase beta chain 5	EC6.4.1.3
Bovatus_00354	-0.8	7.13	0.10835	0.520082	ALJ45023.1	GDP-mannose 4,6-dehydratase	EC4.2.1.47
Bovatus_00042	1.69	1.06	0.343198	0.769341	ALJ44714.1	Beta-xylosidase	EC3.2.1.37|EC3.2.1.55	GH43_10	Bovatus:3	Bovatus:25
Bovatus_00233	-1.86	4.89	0.292794	0.731744	ALJ44905.1	Glycosyl transferase family 8	Unknown
Bovatus_02637	0.75	7.72	0.0883733	0.476193	ALJ47262.1	hypothetical protein	Unknown
Bovatus_04701	2.1	3.11	0.311173	0.742464	ALJ49290.1	hypothetical protein	Unknown
Bovatus_02373	-2.18	3.35	0.348104	0.771165	ALJ47005.1	Small-conductance mechanosensitive channel	NOT DEFINED
Bovatus_03616	1.6	5.23	0.243946	0.694837	ALJ48222.1	hypothetical protein			Bovatus:75	Bovatus:35
Bovatus_03563	-1.89	1.65	0.345996	0.770177	ALJ48169.1	hypothetical protein	Unknown
Bovatus_02998	1.46	5.33	0.267321	0.716042	ALJ47607.1	hypothetical protein	Unknown		Bovatus:53	Bovatus:44
Bovatus_02906	-1.97	2.33	0.333807	0.764385	ALJ47516.1	NADH pyrophosphatase	EC3.6.1.13
Bovatus_04063	-2.12	1.72	0.364986	0.781416	ALJ48658.1	Phenylacetate-coenzyme A ligase	EC6.2.1.30
Bovatus_02020	2.01	3.57	0.338306	0.765331	ALJ46655.1	fec operon regulator FecR	Unknown		Bovatus:32
Bovatus_02111	1.95	1.05	0.360047	0.778108	ALJ46745.1	Fatty acyl-CoA reductase	EC1.3.1.33
Bovatus_04140	-1.77	0.65	0.351139	0.773127	ALJ48734.1	hypothetical protein	Unknown
Bovatus_00453	-1.93	1.2	0.359815	0.778108	ALJ45121.1	Outer membrane efflux protein BepC precursor	NOT DEFINED
Bovatus_01322	-2.08	3.77	0.359822	0.778108	ALJ45968.1	SusD family protein	NOT DEFINED	GH16	Bovatus:17	Bovatus:10
Bovatus_02010	1.97	1.52	0.362963	0.781028	ALJ46645.1	hypothetical protein	EC3.2.1.50
Bovatus_03576	-1.32	5.49	0.236398	0.688199	ALJ48182.1	hypothetical protein	Unknown
Bovatus_03218	2.1	3.06	0.336037	0.765287	ALJ47826.1	putative amino-acid metabolite efflux pump	NOT DEFINED
Bovatus_00402	1.71	5.23	0.243111	0.694837	ALJ45070.1	hypothetical protein	Unknown
Bovatus_02206	1.99	3.89	0.334338	0.764385	ALJ46839.1	hypothetical protein	Unknown
Bovatus_04950	1.78	5.05	0.260103	0.708087	ALJ49537.1	Hydrogen peroxide-inducible genes activator	NOT DEFINED
Bovatus_02841	-2.21	3.06	0.366583	0.781416	ALJ47453.1	hypothetical protein	NOT DEFINED
Bovatus_01910	0.94	7.41	0.120492	0.543294	ALJ46550.1	O-acetylserine sulfhydrylase	EC2.5.1.47
Bovatus_01770	-1.63	0.51	0.352467	0.773127	ALJ46410.1	Glutaconyl-CoA decarboxylase subunit gamma	EC6.4.1.1
Bovatus_02988	1.67	0.3	0.35225	0.773127	ALJ47597.1	Competence protein ComM	NOT DEFINED
Bovatus_00261	-1.73	4.54	0.291824	0.731744	ALJ44933.1	Adenylyl-sulfate kinase	EC2.7.1.25
Bovatus_02542	1.67	0.47	0.355829	0.776866	ALJ47167.1	hypothetical protein	Unknown
Bovatus_01039	2.18	2.31	0.366614	0.781416	ALJ45690.1	hypothetical protein	Unknown
Bovatus_00935	0.61	8.61	0.068742	0.445292	ALJ45592.1	Phosphoribosylglycinamide formyltransferase 2	EC2.1.2.2
Bovatus_02828	1.58	4.64	0.273517	0.716042	ALJ47441.1	hypothetical protein	Unknown
Bovatus_04673	1.89	3.7	0.335901	0.765287	ALJ49263.1	6-carboxy-5,6,7,8-tetrahydropterin synthase	EC4.2.3.12:EC4.1.2.50
Bovatus_00949	-0.95	6.24	0.169514	0.612266	ALJ45606.1	Macrolide export ATP-binding/permease protein MacB	NOT DEFINED
Bovatus_02940	-1.86	4.51	0.309067	0.74185	ALJ47549.1	Unsaturated rhamnogalacturonyl hydrolase YteR	EC3.2.1.172	GH105	Bovatus:52	Bovatus:43
Bovatus_04864	-1.79	5.97	0.259526	0.708087	ALJ49452.1	Unsaturated chondroitin disaccharide hydrolase	EC4.2.2.5	GH88	Bovatus:104	Bovatus:107
Bovatus_01266	1.2	5.77	0.194495	0.652125	ALJ45917.1	putative multidrug resistance protein EmrK	NOT DEFINED
Bovatus_04711	-1.86	4.2	0.336546	0.765287	ALJ49300.1	Trk system potassium uptake protein TrkG	NOT DEFINED
Bovatus_01324	1.94	2.32	0.35162	0.773127	ALJ45970.1	SusD family protein	NOT DEFINED		Bovatus:17	Bovatus:10
Bovatus_04385	-1.77	4.35	0.281055	0.72519	ALJ48978.1	coproporphyrinogen III oxidase	NOT DEFINED
Bovatus_01842	2.1	2.14	0.376264	0.790093	ALJ46482.1	Sensory transduction protein LytR	NOT DEFINED
Bovatus_04846	-2.01	1.85	0.372545	0.786931	ALJ49434.1	hypothetical protein	NOT DEFINED
Bovatus_02709	2.11	2.83	0.358494	0.778108	ALJ47334.1	Autoinducer 2 sensor kinase/phosphatase LuxQ	EC2.7.13.3
Bovatus_03634	-1.68	4.59	0.309977	0.742464	ALJ48240.1	Arylsulfatase	EC3.1.6.1		Bovatus:77
Bovatus_00583	2.06	2.23	0.377318	0.791033	ALJ45249.1	muropeptide transporter	NOT DEFINED		Bovatus:12	Bovatus:85
Bovatus_00625	1.01	6.01	0.189012	0.641296	ALJ45291.1	putative CtpA-like serine protease	EC3.4.21.102		Bovatus:13	Bovatus:7
Bovatus_02675	2.01	1.37	0.378058	0.791313	ALJ47300.1	Acetyl esterase Axe7A precursor	EC3.1.1.41	CE7
Bovatus_00171	2.18	2.75	0.35069	0.772902	ALJ44843.1	Alginate lyase	Unknown		Bovatus:6	Bovatus:31
Bovatus_03366	2.04	3.74	0.347871	0.771165	ALJ47973.1	RNA polymerase sigma factor SigX	NOT DEFINED		Bovatus:67	Bovatus:15
Bovatus_04913	-1.93	4.31	0.314645	0.74452	ALJ49501.1	GDP-mannose-dependent alpha-(1-6)-phosphatidylinositol monomannoside mannosyltransferase	EC2.4.1.-	GT4
Bovatus_01845	-1.19	5.73	0.206094	0.660852	ALJ46485.1	hypothetical protein	Unknown
Bovatus_00521	0.7	7.98	0.0892719	0.477745	ALJ45188.1	hypothetical protein	Unknown
Bovatus_00701	1.95	3.51	0.332048	0.763651	ALJ45367.1	putative oxidoreductase	NOT DEFINED
Bovatus_00381	-1.68	4.66	0.288946	0.731744	ALJ45049.1	type I restriction enzyme EcoKI subunit R	NOT DEFINED
Bovatus_02541	1.64	0.39	0.366738	0.781416	ALJ47166.1	Transposase DDE domain protein
Bovatus_01054	-1.83	1.78	0.374008	0.788744	ALJ45705.1	hypothetical protein	Unknown
Bovatus_04504	-1.44	5.63	0.218419	0.677349	ALJ49097.1	hypothetical protein	Unknown
Bovatus_02357	-2.05	3.35	0.388143	0.798326	ALJ46989.1	Ribosomal RNA large subunit methyltransferase J	EC2.1.1.266
Bovatus_00293	-1.48	5.39	0.263294	0.713301	ALJ44964.1	hypothetical protein	EC3.1.1.53		Bovatus:8	Bovatus:33
Bovatus_02608	1.79	3.77	0.307717	0.740794	ALJ47233.1	DNA-binding protein HU	NOT DEFINED
Bovatus_04948	1.89	4.2	0.336387	0.765287	ALJ49535.1	Periplasmic beta-glucosidase precursor	EC3.2.1.21	GH3	Bovatus:107	Bovatus:110
Bovatus_00519	1.02	6.58	0.158883	0.595781	ALJ45186.1	Ribosomal RNA small subunit methyltransferase G	EC2.1.1.170
Bovatus_01741	1.99	3.43	0.320779	0.750199	ALJ46381.1	hypothetical protein	Unknown			Bovatus:94
Bovatus_04410	-1.63	0.51	0.372336	0.786915	ALJ49003.1	hypothetical protein	NOT DEFINED		Bovatus:97	Bovatus:101
Bovatus_04068	1.53	0.51	0.364142	0.781416	ALJ48663.1	(3R)-hydroxymyristoyl-ACP dehydratase	EC4.2.1.59
Bovatus_04364	-1.18	5.92	0.205861	0.660648	ALJ48957.1	hypothetical protein	EC4.2.2.2	PL1_2	Bovatus:96	Bovatus:100
Bovatus_04451	1.54	5.51	0.254656	0.701837	ALJ49044.1	hypothetical protein	Unknown		Bovatus:99	Bovatus:102
Bovatus_02044	1.47	5.34	0.255964	0.703677	ALJ46679.1	phosphoenolpyruvate synthase	EC2.7.9.2
Bovatus_04108	-1.76	4.33	0.289896	0.731744	ALJ48703.1	Glycosyl hydrolase family 92	Unknown	GH92	Bovatus:93	Bovatus:22
Bovatus_01370	-1.94	4.5	0.302598	0.737088	ALJ46016.1	Putative N-acetylmannosaminyltransferase	EC2.4.1.187	GT26
Bovatus_04715	2.07	2.75	0.366622	0.781416	ALJ49304.1	GDSL-like Lipase/Acylhydrolase	EC3.1.6.14
Bovatus_04228	1.99	3.02	0.346304	0.770177	ALJ48822.1	hypothetical protein	Unknown
Bovatus_00208	-1.67	2.88	0.334614	0.764385	ALJ44880.1	L-arabinose isomerase	EC5.3.1.4
Bovatus_01820	-1.52	0.21	0.37507	0.789706	ALJ46460.1	Methylated-DNA--protein-cysteine methyltransferase	NOT DEFINED
Bovatus_02094	-1.3	6.02	0.209491	0.664884	ALJ46728.1	putative deoxyribonuclease YcfH	EC3.1.21.-
Bovatus_00031	2.04	2.23	0.392894	0.801356	ALJ44703.1	Bacterial Ig-like domain (group 2)	EC3.2.1.51		Bovatus:2	Bovatus:26
Bovatus_02432	-0.86	6.9	0.13639	0.568217	ALJ47058.1	Periplasmic beta-glucosidase precursor	EC3.2.1.21	GH3	Bovatus:42	Bovatus:60
Bovatus_01450	-2.03	1.99	0.403368	0.807328	ALJ46094.1	FMN reductase [NAD(P)H]	EC1.5.1.39
Bovatus_01732	-0.89	7.05	0.132107	0.561563	ALJ46373.1	Sensor histidine kinase TmoS	Unknown		Bovatus:26	Bovatus:93
Bovatus_02356	-1.58	5.39	0.278449	0.721932	ALJ46988.1	hypothetical protein	Unknown
Bovatus_03325	1.7	0.81	0.383554	0.796469	ALJ47932.1	putative RNA polymerase sigma factor FecI	NOT DEFINED		Bovatus:66	Bovatus:3
Bovatus_01282	-2.07	2.96	0.384521	0.796814	ALJ45933.1	L-fuculose phosphate aldolase	EC4.1.2.17
Bovatus_01133	1.66	4.69	0.31123	0.742464	ALJ45784.1	Polysaccharide biosynthesis/export protein	NOT DEFINED
Bovatus_02446	1.69	2.71	0.361021	0.778135	ALJ47072.1	fec operon regulator FecR	Unknown		Bovatus:43	Bovatus:59
Bovatus_00553	1.76	1.16	0.38351	0.796469	ALJ45219.1	Fimbrillin-A associated anchor proteins Mfa1 and Mfa2	Unknown
Bovatus_03320	1.72	3.95	0.345702	0.770177	ALJ47927.1	hypothetical protein	Unknown
Bovatus_03053	1.9	2.25	0.406092	0.8097	ALJ47661.1	Endoglucanase precursor	EC3.2.1.4	GH5_5	Bovatus:54	Bovatus:46
Bovatus_02935	1.89	2.46	0.403458	0.807328	ALJ47544.1	hypothetical protein	EC3.2.1.21		Bovatus:52	Bovatus:43
Bovatus_03155	1.83	1.3	0.395105	0.80377	ALJ47763.1	hypothetical protein	Unknown		Bovatus:58	Bovatus:52
Bovatus_00365	0.84	6.93	0.151004	0.585234	ALJ45034.1	hypothetical protein	Unknown
Bovatus_00524	-1.77	4.55	0.296848	0.733289	ALJ45191.1	TonB-dependent Receptor Plug Domain protein	NOT DEFINED
Bovatus_04052	1.95	2.19	0.409905	0.811716	ALJ48647.1	LL-diaminopimelate aminotransferase	EC2.6.1.83
Bovatus_00706	1.46	0.65	0.389482	0.799399	ALJ45372.1	ABC-2 family transporter protein	NOT DEFINED
Bovatus_04858	1.18	6.14	0.217351	0.677349	ALJ49446.1	Heparin and heparin-sulfate lyase precursor	EC4.2.2.7:EC4.2.2.8	PL15_2	Bovatus:104	Bovatus:107
Bovatus_01492	-1.35	5.85	0.234442	0.687509	ALJ46136.1	Glutaconyl-CoA decarboxylase subunit gamma	EC6.4.1.1
Bovatus_01936	1.58	4.46	0.37692	0.790921	ALJ46571.1	Nicotinate phosphoribosyltransferase 2	EC6.3.4.21
Bovatus_04706	-1.59	0.57	0.387276	0.79829	ALJ49295.1	hypothetical protein	Unknown
Bovatus_01025	-1.81	1.22	0.40794	0.810083	ALJ45676.1	DNA primase TraC	Unknown
Bovatus_02410	1.62	0.71	0.403429	0.807328	ALJ47041.1	Helix-turn-helix domain protein	Unknown
Bovatus_04916	-1.82	3.21	0.405771	0.809472	ALJ49504.1	hypothetical protein	Unknown
Bovatus_03396	-1.78	3.83	0.356604	0.777612	ALJ48003.1	putative glycerophosphoryl diester phosphodiesterase 1	EC3.1.4.46		Bovatus:68	Bovatus:16
Bovatus_01390	1.98	3.35	0.407214	0.810083	ALJ46036.1	transcriptional activator RfaH	NOT DEFINED
Bovatus_00595	2.08	2.85	0.394459	0.802874	ALJ45261.1	Bacterial alpha-L-rhamnosidase	EC3.2.1.40	GH78	Bovatus:12	Bovatus:86
Bovatus_04949	-1.82	2.64	0.400172	0.806635	ALJ49536.1	DNA protection during starvation protein	NOT DEFINED
Bovatus_00160	-2.27	7.3	0.239491	0.692965	ALJ44832.1	hypothetical protein	Unknown
Bovatus_02563	-1.6	0.81	0.392099	0.80085	ALJ47188.1	hypothetical protein
Bovatus_02018	-1.67	4.56	0.333005	0.764385	ALJ46653.1	SusD family protein	NOT DEFINED		Bovatus:32	Bovatus:1
Bovatus_02120	-1.64	0.76	0.399419	0.806598	ALJ46754.1	Acyl-ACP thioesterase	EC3.1.2.21
Bovatus_02127	-1.82	1.47	0.402306	0.807074	ALJ46761.1	hypothetical protein	Unknown
Bovatus_02689	-1.71	2.52	0.344217	0.769341	ALJ47314.1	putative murein peptide carboxypeptidase	EC3.4.17.13
Bovatus_01620	-1.66	3.57	0.381674	0.796325	ALJ46264.1	macrolide transporter subunit MacA	NOT DEFINED
Bovatus_00551	1.82	2.17	0.387309	0.79829	ALJ45217.1	hypothetical protein	Unknown
Bovatus_04362	1.36	5.69	0.241349	0.694743	ALJ48955.1	hypothetical protein	EC4.2.2.2	PL1_2	Bovatus:96	Bovatus:100
Bovatus_00623	1.02	6.52	0.188058	0.641296	ALJ45289.1	hypothetical protein	Unknown		Bovatus:13	Bovatus:7
Bovatus_01916	-1.8	1.91	0.408907	0.81043	ALJ46556.1	3-isopropylmalate dehydratase large subunit	EC4.2.1.33:EC4.2.1.35
Bovatus_02610	1.23	6.05	0.222163	0.680049	ALJ47235.1	hypothetical protein	Unknown
Bovatus_04147	-1.8	1.26	0.412603	0.813389	ALJ48741.1	hypothetical protein	Unknown
Bovatus_00109	-1.72	3.43	0.369251	0.783664	ALJ44781.1	hypothetical protein	Unknown		Bovatus:5
Bovatus_03273	-1.91	3.08	0.425603	0.822719	ALJ47881.1	thiol-disulfide oxidoreductase	Unknown
Bovatus_01836	0.99	7.96	0.103597	0.510418	ALJ46476.1	hypothetical protein	Unknown
Bovatus_04749	1.57	5.25	0.324218	0.75375	ALJ49338.1	hypothetical protein	NOT DEFINED
Bovatus_04537	-1.44	6.08	0.23623	0.688199	ALJ49128.1	Alpha-D-kanosaminyltransferase	EC2.4.1.18	GT4
Bovatus_03726	-0.9	6.54	0.170549	0.612746	ALJ48331.1	hypothetical protein	Unknown		Bovatus:81	Bovatus:73
Bovatus_03895	1.01	6.66	0.165745	0.604176	ALJ48498.1	hypothetical protein	Unknown		Bovatus:88	Bovatus:81
Bovatus_04595	1.57	5.28	0.285309	0.728759	ALJ49186.1	hypothetical protein	Unknown
Bovatus_02415	1.52	0.79	0.414392	0.813399	ALJ47046.1	Sensor protein KdpD	EC2.7.13.3
Bovatus_00986	1.87	3.06	0.416345	0.815897	ALJ45637.1	Thiazole synthase	EC2.8.1.10
Bovatus_01632	1.68	4.44	0.368021	0.783297	ALJ46276.1	O-acetyltransferase OatA	NOT DEFINED
Bovatus_01330	2.02	2.76	0.42428	0.822029	ALJ45976.1	hypothetical protein	Unknown
Bovatus_00085	-1.53	4.97	0.283037	0.728327	ALJ44757.1	SusD family protein	NOT DEFINED		Bovatus:4	Bovatus:24
Bovatus_02898	1.83	2.87	0.431231	0.82435	ALJ47508.1	Spore germination protein YaaH	NOT DEFINED	GH	Bovatus:51	Bovatus:41
Bovatus_00942	-1.03	6.85	0.158459	0.595781	ALJ45599.1	GTP pyrophosphokinase	EC2.7.6.5
Bovatus_02411	-1.87	3	0.427609	0.822719	ALJ47042.1	hypothetical protein	Unknown
Bovatus_03743	1.88	3.27	0.428524	0.822977	ALJ48348.1	hypothetical protein	Unknown	GH115	Bovatus:81	Bovatus:73
Bovatus_02008	-1.8	2.09	0.415623	0.815405	ALJ46643.1	putative multidrug resistance protein EmrK	NOT DEFINED
Bovatus_00556	1.56	5.08	0.263985	0.714184	ALJ45222.1	Major fimbrial subunit protein (FimA)	Unknown
Bovatus_03415	-1.55	0.71	0.411689	0.813389	ALJ48022.1	hypothetical protein	Unknown		Bovatus:69	Bovatus:17
Bovatus_00395	1.82	2.81	0.433917	0.82435	ALJ45063.1	Phosphoadenosine phosphosulfate reductase family protein	EC1.8.4.8:EC1.8.4.10
Bovatus_04157	-1.59	0.75	0.425176	0.822596	ALJ48751.1	hypothetical protein	Unknown
Bovatus_01831	2.03	3.26	0.42684	0.822719	ALJ46471.1	Aldose 1-epimerase	EC5.1.3.3		Bovatus:29	Bovatus:97
Bovatus_01977	1.78	1.94	0.429144	0.82335	ALJ46612.1	PD-(D/E)XK nuclease family transposase	Unknown
Bovatus_04827	-1.89	2.3	0.441998	0.826528	ALJ49415.1	The GLUG motif protein	Unknown
Bovatus_04685	1.66	4.33	0.357293	0.777813	ALJ49275.1	von Willebrand factor	NOT DEFINED
Bovatus_02876	2.02	3.72	0.359127	0.778108	ALJ47486.1	Alpha-N-acetylglucosaminidase (NAGLU) tim-barrel domain protein	EC3.2.1.50	GH89	Bovatus:49	Bovatus:39
Bovatus_01259	-1.95	2.69	0.436944	0.824697	ALJ45910.1	MotA/TolQ/ExbB proton channel family protein	Unknown
Bovatus_04953	1.44	0.55	0.414157	0.813399	ALJ49540.1	RNA polymerase sigma factor YlaC	NOT DEFINED
Bovatus_01615	1.87	1.62	0.438873	0.824697	ALJ46259.1	putative ABC transporter permease YknZ	NOT DEFINED
Bovatus_03328	1.95	2.26	0.441632	0.826238	ALJ47935.1	Susd and RagB outer membrane lipoprotein	Unknown		Bovatus:66	Bovatus:3
Bovatus_02526	-1.69	3.95	0.402707	0.807074	ALJ47151.1	hypothetical protein	Unknown	GH115	Bovatus:45
Bovatus_02946	1.56	5.79	0.267913	0.716042	ALJ47555.1	SusD family protein	NOT DEFINED		Bovatus:52	Bovatus:43
Bovatus_04721	0.96	6.85	0.170729	0.612746	ALJ49310.1	putative N-acetyltransferase YjaB	EC2.3.1.-
Bovatus_00431	-0.68	8.17	0.0842971	0.464001	ALJ45099.1	hypothetical protein	Unknown
Bovatus_03263	0.87	7.56	0.111884	0.52734	ALJ47871.1	Sensor histidine kinase TodS	Unknown		Bovatus:64	Bovatus:58
Bovatus_03629	-1.95	2.27	0.427673	0.822719	ALJ48235.1	hypothetical protein			Bovatus:77	Bovatus:69
Bovatus_00965	1.64	3.66	0.412439	0.813389	ALJ45622.1	Cobalt-zinc-cadmium resistance protein CzcC precursor	NOT DEFINED
Bovatus_04344	-1.83	3.48	0.391555	0.80085	ALJ48937.1	Beta-1,4-mannooligosaccharide phosphorylase	EC3.2.1.197	GH130	Bovatus:95
Bovatus_01414	-1.68	2.05	0.444162	0.827747	ALJ46060.1	Imidazole glycerol phosphate synthase subunit HisH	EC2.4.2.-
Bovatus_03151	-1.55	4.74	0.334907	0.764385	ALJ47759.1	Susd and RagB outer membrane lipoprotein	Unknown		Bovatus:57	Bovatus:51
Bovatus_04357	1.76	2.59	0.449487	0.831475	ALJ48950.1	Unsaturated rhamnogalacturonyl hydrolase YteR	EC3.2.1.172	GH105	Bovatus:96	Bovatus:100
Bovatus_04955	1.88	3.65	0.418059	0.817555	ALJ49542.1	putative RNA polymerase sigma factor FecI	NOT DEFINED		Bovatus:108	Bovatus:111
Bovatus_04960	1.76	2.37	0.449709	0.831475	ALJ49547.1	putative glycerophosphoryl diester phosphodiesterase 1	EC3.1.4.46		Bovatus:108	Bovatus:111
Bovatus_01342	-1.86	3.38	0.404872	0.808928	ALJ45988.1	Phosphate transport system permease protein PstC	NOT DEFINED
Bovatus_04323	-1.77	3.54	0.402613	0.807074	ALJ48916.1	NAD(P)H-quinone oxidoreductase subunit 3	EC1.6.5.3
Bovatus_04887	-1.78	2.18	0.448389	0.831475	ALJ49475.1	hypothetical protein	Unknown
Bovatus_03037	-1.71	2.07	0.456286	0.836062	ALJ47645.1	hypothetical protein	Unknown
Bovatus_04379	1.4	5.64	0.269362	0.716042	ALJ48972.1	Pectinesterase A precursor	EC3.1.1.11	CE8	Bovatus:96	Bovatus:100
Bovatus_02878	-1.71	4.63	0.365874	0.781416	ALJ47488.1	High-affinity gluconate transporter	NOT DEFINED		Bovatus:49	Bovatus:39
Bovatus_04015	1.14	6.37	0.182084	0.632043	ALJ48610.1	Thioldisulfide interchange protein TlpA	NOT DEFINED
Bovatus_03143	-1.29	5.9	0.228509	0.684513	ALJ47751.1	Fibrobacter succinogenes major domain	Unknown		Bovatus:57	Bovatus:50
Bovatus_02375	1.72	1.58	0.437702	0.824697	ALJ47007.1	Nicotinamide riboside transporter PnuC	NOT DEFINED
Bovatus_03430	-1.68	1.71	0.445044	0.827747	ALJ48037.1	WbqC-like protein family protein	Unknown
Bovatus_01594	1.8	2.09	0.430713	0.82435	ALJ46238.1	hypothetical protein
Bovatus_00713	-1.78	2.32	0.4393	0.825032	ALJ45378.1	Alkaline phosphatase synthesis transcriptional regulatory protein PhoP	NOT DEFINED
Bovatus_04604	-1.45	5.04	0.334169	0.764385	ALJ49195.1	hypothetical protein	EC3.2.1.4		Bovatus:101	Bovatus:104
Bovatus_00768	1.53	0.95	0.431572	0.82435	ALJ45430.1	hypothetical protein	NOT DEFINED
Bovatus_01992	-1.63	1.22	0.442333	0.826758	ALJ46627.1	hypothetical protein	Unknown
Bovatus_00213	-1.73	2.61	0.466033	0.840444	ALJ44885.1	Extracellular exo-alpha-L-arabinofuranosidase precursor	EC3.2.1.55	GH51
Bovatus_03752	-0.89	6.84	0.140653	0.576406	ALJ48357.1	hypothetical protein	Unknown
Bovatus_00155	1.52	5.17	0.310407	0.742464	ALJ44827.1	putative lipoate-protein ligase A	EC6.3.1.20
Bovatus_00938	1.44	0.45	0.426413	0.822719	ALJ45595.1	Cyclic nucleotide-binding domain protein	Unknown
Bovatus_03684	-1.62	1.59	0.468235	0.841403	ALJ48290.1	SusD family protein	NOT DEFINED		Bovatus:79	Bovatus:71
Bovatus_01902	-1.83	3.12	0.436637	0.824697	ALJ46542.1	Alpha-L-fucosidase	EC3.2.1.51	GH29
Bovatus_03749	-1.51	0.72	0.430675	0.82435	ALJ48354.1	Amidase enhancer precursor	NOT DEFINED
Bovatus_00761	1.83	2.65	0.451889	0.833413	ALJ45423.1	Efflux pump periplasmic linker BepF	NOT DEFINED
Bovatus_02984	1.15	6.04	0.232061	0.68602	ALJ47593.1	hypothetical protein	Unknown
Bovatus_01635	0.52	9.16	0.0628536	0.43321	ALJ46279.1	Dipeptidase	EC3.4.-.-
Bovatus_02883	1.21	6.49	0.224587	0.684513	ALJ47493.1	Ferric enterobactin receptor precursor	NOT DEFINED		Bovatus:49	Bovatus:39
Bovatus_00198	-1.55	1.13	0.454558	0.835634	ALJ44870.1	Methionine synthase	EC2.1.1.13
Bovatus_03480	-0.69	7.82	0.0993838	0.501305	ALJ48087.1	Chondroitin sulfate ABC exolyase precursor	EC4.2.2.20:EC4.2.2.21	PL8_2	Bovatus:73	Bovatus:36
Bovatus_01773	-1.74	2.88	0.413276	0.813399	ALJ46413.1	50S ribosomal protein L31 type B	NOT DEFINED
Bovatus_01011	0.51	9.47	0.0501842	0.391077	ALJ45662.1	hypothetical protein	EC3.6.4.12
Bovatus_04510	1.78	2.97	0.440018	0.825032	ALJ49103.1	EamA-like transporter family protein	NOT DEFINED
Bovatus_02791	-0.77	7.23	0.119646	0.543294	ALJ47409.1	hypothetical protein	Unknown
Bovatus_02253	1.61	4.49	0.332477	0.763741	ALJ46886.1	hypothetical protein	NOT DEFINED
Bovatus_03339	-1.59	4.1	0.364203	0.781416	ALJ47946.1	tRNA 5-methylaminomethyl-2-thiouridine biosynthesis bifunctional protein MnmC	EC2.1.1.61:EC1.5.-.-
Bovatus_00673	-1.3	5.22	0.309162	0.74185	ALJ45339.1	hypothetical protein	Unknown
Bovatus_03134	1.29	0.37	0.447802	0.831475	ALJ47742.1	dTDP-glucose 4,6-dehydratase	EC5.1.3.2
Bovatus_04678	1.75	4.59	0.375991	0.790093	ALJ49268.1	Pyridoxine kinase	EC2.7.1.35
Bovatus_04738	0.92	6.84	0.13109	0.560466	ALJ49327.1	putative zinc-type alcohol dehydrogenase-like protein YjmD	EC1.1.1.-
Bovatus_01256	-1.38	0.73	0.449532	0.831475	ALJ45907.1	Colicin I receptor precursor	NOT DEFINED
Bovatus_01286	-1.58	0.97	0.444534	0.827747	ALJ45937.1	putative RNA polymerase sigma factor FecI	NOT DEFINED		Bovatus:16	Bovatus:84
Bovatus_03650	-1.7	4.12	0.366335	0.781416	ALJ48256.1	hypothetical protein	Unknown		Bovatus:78	Bovatus:70
Bovatus_03685	1.59	1.41	0.448097	0.831475	ALJ48291.1	TonB-dependent Receptor Plug Domain protein	NOT DEFINED		Bovatus:79	Bovatus:71
Bovatus_02648	1.62	1.28	0.449699	0.831475	ALJ47273.1	Toluene efflux pump outer membrane protein TtgI precursor	NOT DEFINED
Bovatus_01644	-1.55	2.95	0.468766	0.841585	ALJ46288.1	hypothetical protein	Unknown
Bovatus_02421	1.18	6.08	0.216252	0.677349	ALJ47052.1	Trehalase	EC3.2.1.3	GH15
Bovatus_02839	-1.91	3.85	0.439902	0.825032	ALJ47451.1	hypothetical protein	Unknown
Bovatus_00711	-1.6	2.28	0.477645	0.843947	ALJ45376.1	hypothetical protein	Unknown
Bovatus_02748	1.66	3.32	0.431742	0.82435	ALJ47366.1	Histidine ammonia-lyase	EC4.3.1.3
Bovatus_00522	1.52	4.51	0.352751	0.773127	ALJ45189.1	putative metallophosphoesterase	NOT DEFINED
Bovatus_01237	-1.69	3.8	0.477885	0.843947	ALJ45888.1	Phosphate-selective porin O and P	Unknown
Bovatus_00079	-1.47	1.52	0.456259	0.836062	ALJ44751.1	Thioldisulfide interchange protein DsbD precursor	EC1.8.1.8
Bovatus_01766	-1.57	3.34	0.466903	0.840444	ALJ46406.1	FemAB family protein	Unknown
Bovatus_00588	1.3	5.27	0.328394	0.758369	ALJ45254.1	hypothetical protein	Unknown		Bovatus:12	Bovatus:86
Bovatus_02606	1.47	0.99	0.454999	0.836053	ALJ47231.1	Aquaporin Z	NOT DEFINED
Bovatus_03696	1.53	0.77	0.452071	0.833413	ALJ48301.1	Oxidoreductase family, NAD-binding Rossmann fold	Unknown		Bovatus:80	Bovatus:72
Bovatus_00033	-1.23	5.61	0.269917	0.716042	ALJ44705.1	Beta-galactosidase	EC3.2.1.23	GH2	Bovatus:2	Bovatus:26
Bovatus_00945	0.78	7.56	0.120097	0.543294	ALJ45602.1	Beta-phosphoglucomutase	EC5.4.2.6
Bovatus_01619	-1.67	2.95	0.457106	0.83641	ALJ46263.1	ABC transporter ATP-binding protein YtrE	NOT DEFINED
Bovatus_03165	-1.49	5.21	0.32073	0.750199	ALJ47773.1	hypothetical protein	Unknown
Bovatus_00450	1.7	3.05	0.433665	0.82435	ALJ45118.1	Macrolide export ATP-binding/permease protein MacB	NOT DEFINED
Bovatus_00020	1.23	5.83	0.267619	0.716042	ALJ44692.1	hypothetical protein	Unknown		Bovatus:1	Bovatus:27
Bovatus_00235	1.36	5.47	0.287213	0.729122	ALJ44907.1	Acyltransferase family protein	EC2.3.1.-
Bovatus_01100	-1.67	3.01	0.485229	0.843947	ALJ45751.1	hypothetical protein	Unknown
Bovatus_00071	-1.29	0.36	0.455673	0.836062	ALJ44743.1	SsrA-binding protein	NOT DEFINED
Bovatus_00842	1.6	1.65	0.466534	0.840444	ALJ45500.1	hypothetical protein	Unknown
Bovatus_02692	1.03	6.03	0.221188	0.678779	ALJ47317.1	Butyrate kinase 2	EC2.7.2.7
Bovatus_01394	-0.69	7.47	0.109977	0.525154	ALJ46040.1	DNA repair protein RecN	NOT DEFINED
Bovatus_04823	-1.64	1.4	0.471743	0.842208	ALJ49411.1	hypothetical protein	Unknown
Bovatus_02039	-1.55	4.39	0.355865	0.776866	ALJ46674.1	hypothetical protein	Unknown
Bovatus_03121	-1.51	4.39	0.407275	0.810083	ALJ47729.1	Unsaturated chondroitin disaccharide hydrolase	EC3.2.1.180	GH88	Bovatus:56	Bovatus:49
Bovatus_00834	1.72	3.41	0.459904	0.838039	ALJ45492.1	hypothetical protein	Unknown
Bovatus_03248	-1.52	1.63	0.479768	0.843947	ALJ47856.1	hypothetical protein	Unknown		Bovatus:63	Bovatus:57
Bovatus_04439	-1.69	2.97	0.48748	0.844067	ALJ49032.1	Rhamnogalacturonan exolyase YesX	EC4.2.2.23	PL11_1	Bovatus:98	Bovatus:102
Bovatus_02978	0.78	7.11	0.143517	0.579454	ALJ47587.1	hypothetical protein	Unknown
Bovatus_02203	-1.84	3.63	0.412017	0.813389	ALJ46836.1	hypothetical protein	Unknown
Bovatus_03054	-1.35	6.24	0.27823	0.721932	ALJ47662.1	Putative endoglucanase	Unknown	GH140	Bovatus:54	Bovatus:46
Bovatus_00740	-0.8	8.85	0.0812361	0.460714	ALJ45405.1	Tetratricopeptide repeat protein	Unknown
Bovatus_04674	1.24	0.16	0.461186	0.838753	ALJ49264.1	7-carboxy-7-deazaguanine synthase	EC4.3.99.3
Bovatus_04524	1.77	3.95	0.413381	0.813399	ALJ49115.1	Histidinol-phosphatase	EC3.1.3.15
Bovatus_01540	1.58	4.57	0.37505	0.789706	ALJ46184.1	SusD family protein	NOT DEFINED		Bovatus:21	Bovatus:88
Bovatus_03839	-1.53	5.27	0.315454	0.74452	ALJ48444.1	Argininosuccinate lyase	EC4.3.2.1
Bovatus_02654	-1.63	1.64	0.481484	0.843947	ALJ47279.1	hypothetical protein	Unknown
Bovatus_01111	1.4	1.02	0.470657	0.842208	ALJ45762.1	Polysaccharide pyruvyl transferase	EC2.2.1.9
Bovatus_02174	-1.54	2.32	0.493605	0.847679	ALJ46808.1	hypothetical protein
Bovatus_03820	1.01	6.94	0.165957	0.604176	ALJ48425.1	Thiosulfate sulfurtransferase GlpE	EC3.4.21.102
Bovatus_01611	-1.63	2.37	0.478929	0.843947	ALJ46255.1	Nitrogen regulation protein NR(I)	NOT DEFINED
Bovatus_04148	-1.62	1.83	0.491524	0.846321	ALJ48742.1	hypothetical protein	Unknown
Bovatus_00537	1.45	1.07	0.471912	0.842208	ALJ45204.1	hypothetical protein	Unknown
Bovatus_01768	-1.36	1.49	0.476256	0.843947	ALJ46408.1	putative propionyl-CoA carboxylase beta chain 5	EC6.4.1.3
Bovatus_04766	1.51	1.68	0.487798	0.844067	ALJ49354.1	hypothetical protein	Unknown
Bovatus_01288	1.62	4.68	0.383779	0.796469	ALJ45939.1	Vitamin B12 transporter BtuB			Bovatus:16	Bovatus:84
Bovatus_01015	1.65	4.24	0.408787	0.81043	ALJ45666.1	DNA polymerase IV	NOT DEFINED
Bovatus_03435	1.74	3.68	0.414368	0.813399	ALJ48042.1	hypothetical protein	Unknown
Bovatus_01204	-1.41	0.6	0.463844	0.840444	ALJ45855.1	Ammonia channel precursor	NOT DEFINED
Bovatus_03060	1.32	0.93	0.474384	0.842919	ALJ47668.1	hypothetical protein	Unknown			Bovatus:47
Bovatus_02507	1.19	5.83	0.245717	0.694837	ALJ47132.1	hypothetical protein	NOT DEFINED		Bovatus:45
Bovatus_01543	-1.63	4.08	0.422181	0.819957	ALJ46187.1	Sialidase precursor	EC3.2.1.18	GH33	Bovatus:21	Bovatus:88
Bovatus_02480	-1.19	0.23	0.455993	0.836062	ALJ47105.1	hypothetical protein	Unknown
Bovatus_04772	1.68	2.64	0.474243	0.842919	ALJ49360.1	Retaining alpha-galactosidase precursor	EC3.2.1.3	GH97
Bovatus_04669	1.26	0.58	0.462357	0.840102	ALJ49259.1	Virginiamycin B lyase	Unknown
Bovatus_01442	-0.85	7.01	0.148735	0.584776	ALJ46086.1	hypothetical protein	EC3.4.21.-
Bovatus_01206	1.38	0.97	0.488273	0.844067	ALJ45857.1	acid-resistance membrane protein	Unknown
Bovatus_04332	-1.46	5.07	0.313315	0.74452	ALJ48925.1	Bacterial alpha-L-rhamnosidase	EC3.2.1.40	GH78	Bovatus:95	Bovatus:99
Bovatus_00108	1.4	0.98	0.486346	0.843947	ALJ44780.1	hypothetical protein	Unknown		Bovatus:5
Bovatus_00838	-1.42	0.99	0.481279	0.843947	ALJ45496.1	Sensor histidine kinase YpdA	Unknown
Bovatus_03842	1.21	0.26	0.466771	0.840444	ALJ48445.1	ECF RNA polymerase sigma factor RpoE	NOT DEFINED		Bovatus:84	Bovatus:77
Bovatus_03028	-1.55	1.75	0.496505	0.850034	ALJ47637.1	hypothetical protein	Unknown
Bovatus_01546	-0.77	7.77	0.107202	0.518887	ALJ46190.1	HTH-type transcriptional regulator LutR	NOT DEFINED			Bovatus:88
Bovatus_02937	1.61	3.39	0.501715	0.853144	ALJ47546.1	Acetyl esterase Axe7A precursor	EC3.1.1.41	CE7	Bovatus:52	Bovatus:43
Bovatus_00347	1.36	0.83	0.471465	0.842208	ALJ45016.1	hypothetical protein	Unknown
Bovatus_00593	-1.32	0.98	0.478009	0.843947	ALJ45259.1	Glycosyl hydrolases family 43	EC3.2.1.23	GH43_18	Bovatus:12	Bovatus:86
Bovatus_00892	-1.57	3.39	0.474351	0.842919	ALJ45549.1	GalNAc-alpha-(1->4)-GalNAc-alpha-(1->3)- diNAcBac-PP-undecaprenol alpha-1,4-N-acetyl-D-galactosaminyltransferase	EC2.4.1.292	GT4
Bovatus_01866	1.62	2.5	0.468487	0.841471	ALJ46506.1	Chaperone modulatory protein CbpM	NOT DEFINED
Bovatus_01461	-1.43	2.71	0.482878	0.843947	ALJ46105.1	hypothetical protein	Unknown		Bovatus:18	Bovatus:13
Bovatus_03020	-1.34	0.8	0.492309	0.847299	ALJ47629.1	LicD family protein	EC2.7.8.-
Bovatus_02282	-1.5	4.08	0.419018	0.817844	ALJ46915.1	L-fucose-proton symporter	NOT DEFINED
Bovatus_01971	1.72	3.86	0.424463	0.822029	ALJ46606.1	Phosphonoacetaldehyde hydrolase	EC3.11.1.1
Bovatus_01742	1.53	3.94	0.457385	0.83641	ALJ46382.1	hypothetical protein	Unknown			Bovatus:94
Bovatus_04849	1.5	2.89	0.513343	0.857106	ALJ49437.1	hypothetical protein	NOT DEFINED
Bovatus_04851	0.98	5.97	0.227483	0.684513	ALJ49439.1	ECF RNA polymerase sigma factor SigW	NOT DEFINED
Bovatus_01518	1.19	0.64	0.482785	0.843947	ALJ46162.1	Helix-turn-helix domain protein	Unknown
Bovatus_00552	1.55	2.31	0.443539	0.827747	ALJ45218.1	hypothetical protein	Unknown
Bovatus_03329	-1.45	1.7	0.505806	0.853444	ALJ47936.1	hypothetical protein	Unknown	GH	Bovatus:66	Bovatus:3
Bovatus_01883	-1.48	2.05	0.510388	0.856141	ALJ46523.1	hypothetical protein	Unknown
Bovatus_04709	1.2	6.69	0.219347	0.677349	ALJ49298.1	putative oxidoreductase	NOT DEFINED
Bovatus_04029	-1.43	1.48	0.507509	0.853444	ALJ48624.1	hypothetical protein	Unknown		Bovatus:91	Bovatus:20
Bovatus_00659	1.54	4.47	0.382503	0.796469	ALJ45325.1	Beta-galactosidase	EC3.2.1.23	GH2	Bovatus:14
Bovatus_03076	-1.46	4.52	0.419166	0.817844	ALJ47684.1	hypothetical protein	EC6.5.1.2		Bovatus:55
Bovatus_04594	1.57	2.66	0.463098	0.840444	ALJ49185.1	Nucleoside triphosphate pyrophosphohydrolase	EC3.6.1.66
Bovatus_04506	-1.43	1.06	0.504805	0.853444	ALJ49099.1	hypothetical protein	Unknown
Bovatus_04790	-1.64	3.08	0.436797	0.824697	ALJ49378.1	hypothetical protein	Unknown
Bovatus_03572	-1.56	2.98	0.50905	0.854312	ALJ48178.1	hypothetical protein	Unknown
Bovatus_04911	1.45	1.97	0.516733	0.857909	ALJ49499.1	Phosphoheptose isomerase	EC5.3.1.28
Bovatus_01013	-1.39	5.09	0.304637	0.739292	ALJ45664.1	hypothetical protein	Unknown
Bovatus_04397	1.4	1.7	0.506902	0.853444	ALJ48990.1	hypothetical protein	Unknown		Bovatus:97	Bovatus:101
Bovatus_02386	-1.32	1.07	0.505432	0.853444	ALJ47018.1	IS66 Orf2 like protein	NOT DEFINED
Bovatus_04963	1.53	3.05	0.496239	0.849951	ALJ49550.1	Regulatory protein UhpC	NOT DEFINED		Bovatus:108	Bovatus:111
Bovatus_02218	1.49	2.69	0.470052	0.842208	ALJ46851.1	Acyltransferase family protein	EC2.3.1.-
Bovatus_03731	1.24	5.45	0.322429	0.752143	ALJ48336.1	Carbohydrate acetyl esterase/feruloyl esterase precursor	NOT DEFINED	CE6-CE1	Bovatus:81	Bovatus:73
Bovatus_00915	1.52	4.72	0.444631	0.827747	ALJ45572.1	hypothetical protein	Unknown
Bovatus_00346	1.52	3.91	0.467057	0.840444	ALJ45015.1	ATPase RavA	EC3.6.3.-
Bovatus_00672	-1.2	5.69	0.297011	0.733289	ALJ45338.1	hypothetical protein	Unknown
Bovatus_04450	1.37	4.98	0.351531	0.773127	ALJ49043.1	Fasciclin domain protein	Unknown		Bovatus:99	Bovatus:102
Bovatus_01375	-0.7	8.04	0.0979234	0.498149	ALJ46021.1	hypothetical protein	Unknown
Bovatus_00644	-1.45	4.58	0.422035	0.819957	ALJ45310.1	Vitamin B12 transporter BtuB precursor	NOT DEFINED		Bovatus:14	Bovatus:6
Bovatus_04770	-1.31	5.17	0.348227	0.771165	ALJ49358.1	hypothetical protein	Unknown
Bovatus_02513	-0.9	6.25	0.205177	0.660648	ALJ47138.1	Arabinoxylan arabinofuranohydrolase precursor	EC3.2.1.55	GH43_29-CBM6	Bovatus:45
Bovatus_00250	1.6	3.38	0.496037	0.849951	ALJ44922.1	Putative N-acetylmannosaminyltransferase	EC2.4.1.187	GT26
Bovatus_03207	1.34	5.96	0.272412	0.716042	ALJ47815.1	SusD family protein	NOT DEFINED		Bovatus:61	Bovatus:55
Bovatus_00426	-1.34	2.09	0.547019	0.875449	ALJ45094.1	hypothetical protein	Unknown
Bovatus_04834	-1.3	0.61	0.505596	0.853444	ALJ49422.1	hypothetical protein
Bovatus_01931	1.56	3.6	0.459601	0.838039	ALJ46566.1	hypothetical protein	Unknown
Bovatus_02642	1.45	2.45	0.53609	0.870757	ALJ47267.1	hypothetical protein
Bovatus_03768	1.43	1.46	0.520239	0.861526	ALJ48373.1	hypothetical protein	Unknown
Bovatus_00528	1.5	3.66	0.463593	0.840444	ALJ45195.1	Octanoyltransferase	EC2.3.1.181
Bovatus_03171	1.34	1.36	0.511722	0.856486	ALJ47779.1	Carboxylesterase NlhH	EC3.5.1.9
Bovatus_04821	1.16	0.57	0.508096	0.853444	ALJ49409.1	hypothetical protein	Unknown
Bovatus_01092	-1.5	4.42	0.386594	0.79829	ALJ45743.1	Electron transport complex protein RnfE	NOT DEFINED
Bovatus_03056	1.54	2.83	0.476349	0.843947	ALJ47664.1	Inner membrane symporter YicJ	NOT DEFINED		Bovatus:54	Bovatus:46
Bovatus_03163	-1.01	6.69	0.227573	0.684513	ALJ47771.1	Transposase IS66 family protein	NOT DEFINED
Bovatus_02893	1.02	5.66	0.258503	0.706702	ALJ47503.1	Endo-1,4-beta-xylanase/feruloyl esterase precursor	EC3.1.2.12	CE1	Bovatus:50	Bovatus:40
Bovatus_01925	-1.5	3.5	0.505396	0.853444	ALJ46560.1	hypothetical protein	Unknown
Bovatus_00009	1.11	6.47	0.229661	0.684513	ALJ44681.1	Retaining alpha-galactosidase precursor	EC3.2.1.20	GH97
Bovatus_00493	-1.5	2.09	0.514054	0.85726	ALJ45160.1	Mannosylfructose-phosphate synthase	EC2.4.1.-	GT4
Bovatus_02499	1.43	1.59	0.53154	0.86819	ALJ47124.1	CobQ/CobB/MinD/ParA nucleotide binding domain protein	NOT DEFINED
Bovatus_01053	-1.44	4.3	0.342205	0.769341	ALJ45704.1	Helix-turn-helix domain protein	Unknown
Bovatus_00012	1.31	0.4	0.50482	0.853444	ALJ44684.1	hypothetical protein	Unknown
Bovatus_03397	1.61	3.02	0.456546	0.836147	ALJ48004.1	putative glycerophosphoryl diester phosphodiesterase 1	EC3.1.4.46		Bovatus:68	Bovatus:16
Bovatus_02023	-1.27	1.33	0.519529	0.861039	ALJ46658.1	hypothetical protein
Bovatus_03093	-1.27	0.75	0.524043	0.865067	ALJ47701.1	hypothetical protein
Bovatus_02958	1.35	1.92	0.555164	0.877122	ALJ47567.1	Competence protein ComM	NOT DEFINED
Bovatus_02585	-1.01	0.08	0.490244	0.845499	ALJ47210.1	hypothetical protein	Unknown
Bovatus_03599	1.52	4.44	0.433722	0.82435	ALJ48205.1	Murein hydrolase activator EnvC precursor	EC3.4.-.-			Bovatus:35
Bovatus_01041	1.32	1.02	0.520668	0.861613	ALJ45692.1	hypothetical protein	Unknown
Bovatus_02104	-1.57	3.5	0.500415	0.85246	ALJ46738.1	PepSY-associated TM helix	EC1.8.1.2
Bovatus_04417	1.41	4.8	0.413917	0.813399	ALJ49010.1	hypothetical protein	EC4.2.2.23	PL26	Bovatus:97	Bovatus:101
Bovatus_02844	1.44	3.64	0.428847	0.823185	ALJ47456.1	hypothetical protein	Unknown
Bovatus_00961	-1.51	2.77	0.523712	0.865067	ALJ45618.1	Transcriptional regulatory protein CusR	NOT DEFINED
Bovatus_00667	-1.55	3.86	0.457627	0.83641	ALJ45333.1	Autotransporter beta-domain protein	Unknown
Bovatus_04411	-1.35	1.14	0.522469	0.863922	ALJ49004.1	hypothetical protein	Unknown		Bovatus:97	Bovatus:101
Bovatus_00016	-1.57	3.17	0.486693	0.843947	ALJ44688.1	RNA polymerase sigma factor YlaC	NOT DEFINED		Bovatus:1	Bovatus:27
Bovatus_01150	-1.26	3.34	0.358569	0.778108	ALJ45801.1	hypothetical protein	Unknown
Bovatus_00463	-1.19	6.08	0.286295	0.728759	ALJ45131.1	hypothetical protein	Unknown
Bovatus_04171	-1.28	5.03	0.298962	0.733404	ALJ48765.1	hypothetical protein
Bovatus_01941	1.14	5.75	0.275676	0.718525	ALJ46576.1	N-acetylmuramoyl-L-alanine amidase	EC3.5.1.28
Bovatus_04242	1.3	1.87	0.549255	0.875496	ALJ48836.1	hypothetical protein	Unknown
Bovatus_01001	-1.2	0.39	0.513276	0.857106	ALJ45652.1	Helix-turn-helix domain protein	Unknown
Bovatus_00921	1.44	1.46	0.55209	0.876456	ALJ45578.1	RNA-splicing ligase RtcB	EC6.5.1.3
Bovatus_01685	-1.44	2.81	0.539903	0.872408	ALJ46327.1	Bifunctional protein FolD protein	EC1.5.1.5:EC3.5.4.9
Bovatus_04033	-1.59	4.77	0.38485	0.797	ALJ48628.1	hypothetical protein	NOT DEFINED
Bovatus_00059	1.31	5.79	0.311627	0.742464	ALJ44731.1	Penicillin-binding protein 4 precursor	EC2.4.1.129	GT51
Bovatus_00681	1.23	0.8	0.529463	0.867861	ALJ45347.1	hypothetical protein	EC4.2.2.2	PL1_2
Bovatus_01595	0.92	6.73	0.180312	0.628338	ALJ46239.1	hypothetical protein	Unknown		Bovatus:22	Bovatus:89
Bovatus_04907	-1.12	1.11	0.506684	0.853444	ALJ49495.1	hypothetical protein	Unknown
Bovatus_04426	-1.32	3.29	0.529739	0.867861	ALJ49019.1	Unsaturated rhamnogalacturonyl hydrolase YteR	EC3.2.1.172	GH105	Bovatus:97	Bovatus:101
Bovatus_00333	-1.32	3.02	0.570765	0.882391	ALJ45004.1	hypothetical protein	Unknown
Bovatus_03192	1.26	1.42	0.537392	0.870757	ALJ47800.1	hypothetical protein	Unknown		Bovatus:60	Bovatus:54
Bovatus_00326	1.26	1.11	0.532632	0.86819	ALJ44997.1	hypothetical protein	Unknown
Bovatus_04114	1.5	3.01	0.49609	0.849951	ALJ48709.1	Cobalt-zinc-cadmium resistance protein CzcB	NOT DEFINED
Bovatus_03026	1.31	1.64	0.542327	0.87344	ALJ47635.1	Demethylrebeccamycin-D-glucose O-methyltransferase	EC2.7.11.1
Bovatus_02942	1.42	4.39	0.405553	0.809451	ALJ47551.1	Periplasmic beta-glucosidase precursor	EC3.2.1.21	GH3	Bovatus:52	Bovatus:43
Bovatus_01127	1.39	5.27	0.292456	0.731744	ALJ45778.1	hypothetical protein	Unknown
Bovatus_04370	1.42	4.89	0.356937	0.777813	ALJ48963.1	Sensory transduction protein LytR	NOT DEFINED		Bovatus:96	Bovatus:100
Bovatus_04596	-1.43	2.95	0.514109	0.85726	ALJ49187.1	hypothetical protein	Unknown
Bovatus_00194	-1.4	5.04	0.384366	0.796814	ALJ44866.1	hypothetical protein	NOT DEFINED
Bovatus_00355	1.29	1.02	0.553093	0.876456	ALJ45024.1	Serine/threonine transporter SstT	Unknown
Bovatus_03835	-1.15	0.72	0.533692	0.868832	ALJ48440.1	Release factor glutamine methyltransferase	EC2.1.1.297
Bovatus_04633	1.31	1.13	0.545038	0.874644	ALJ49224.1	pyrroloquinoline quinone biosynthesis protein PqqD	Unknown
Bovatus_01426	-1.17	1.36	0.578945	0.886479	ALJ46070.1	ATP-grasp domain protein	Unknown
Bovatus_03504	-1.14	0.32	0.528249	0.867695	ALJ48111.1	Chondroitin synthase	EC2.4.1.175:EC2.4.1.226	GT2
Bovatus_01892	-0.7	7.31	0.120825	0.543294	ALJ46532.1	ADP-ribose pyrophosphatase	EC3.6.1.13
Bovatus_02851	1.35	2.86	0.573369	0.883278	ALJ47463.1	hypothetical protein	EC3.2.1.51	GH95
Bovatus_00123	1.28	1.64	0.568212	0.881718	ALJ44795.1	hypothetical protein	Unknown
Bovatus_04266	1.06	5.66	0.277646	0.721696	ALJ48860.1	hypothetical protein	Unknown		Bovatus:94	Bovatus:98
Bovatus_04603	-1.53	3.4	0.470244	0.842208	ALJ49194.1	Fibrobacter succinogenes major domain	Unknown		Bovatus:101	Bovatus:104
Bovatus_02209	1.35	2.88	0.545231	0.874644	ALJ46842.1	hypothetical protein	Unknown
Bovatus_04377	1.49	3.17	0.516065	0.85726	ALJ48970.1	hypothetical protein	Unknown		Bovatus:96	Bovatus:100
Bovatus_04571	-1.31	2.33	0.589831	0.888836	ALJ49162.1	Thioredoxin	NOT DEFINED		Bovatus:100	Bovatus:103
Bovatus_03683	-1.42	2.01	0.559384	0.878308	ALJ48289.1	Periplasmic beta-glucosidase precursor	EC3.2.1.21	GH3	Bovatus:79	Bovatus:71
Bovatus_03369	1.04	5.75	0.259902	0.708087	ALJ47976.1	SusD family protein	NOT DEFINED		Bovatus:67	Bovatus:15
Bovatus_02640	-1.29	2.65	0.577016	0.886064	ALJ47265.1	Endonuclease YhcR precursor	EC3.1.3.5
Bovatus_02051	1.12	0.91	0.565192	0.880888	ALJ46686.1	hypothetical protein	Unknown
Bovatus_02685	1.37	2.12	0.537768	0.870757	ALJ47310.1	hypothetical protein
Bovatus_02979	-1.37	4.14	0.496727	0.850041	ALJ47588.1	hypothetical protein	Unknown
Bovatus_03331	-1.15	0.28	0.529001	0.867695	ALJ47938.1	ORF6N domain protein	Unknown
Bovatus_00369	1.07	0.32	0.519661	0.861039	ALJ45038.1	hypothetical protein	Unknown
Bovatus_01726	-1.25	2.48	0.581437	0.886479	ALJ46367.1	Glucuronide carrier protein	NOT DEFINED		Bovatus:26	Bovatus:93
Bovatus_02823	1.09	0.64	0.545311	0.874644	ALJ47436.1	hypothetical protein	Unknown
Bovatus_04395	-1.52	3.95	0.432804	0.82435	ALJ48988.1	hypothetical protein	Unknown	GH106	Bovatus:97	Bovatus:101
Bovatus_03550	1.28	1.41	0.579162	0.886479	ALJ48157.1	Ribonuclease HII	EC3.1.26.4
Bovatus_04947	1.28	2.63	0.556931	0.877122	ALJ49534.1	hypothetical protein	Unknown		Bovatus:107	Bovatus:110
Bovatus_01271	-1.32	2.46	0.580516	0.886479	ALJ45922.1	Inner membrane protein CreD	NOT DEFINED
Bovatus_03482	-1.26	2.97	0.584924	0.886479	ALJ48089.1	Sugar phosphatase YidA	Unknown
Bovatus_00626	-1.26	2.82	0.590948	0.889834	ALJ45292.1	Peptidase C10 family protein	Unknown			Bovatus:7
Bovatus_01163	-1.27	4.84	0.386038	0.798192	ALJ45814.1	Inner membrane transport permease YbhS	NOT DEFINED
Bovatus_03071	1.2	5.92	0.249734	0.696831	ALJ47679.1	TonB dependent receptor	Unknown		Bovatus:55	Bovatus:47
Bovatus_01984	-1	0.58	0.55279	0.876456	ALJ46619.1	hypothetical protein	Unknown		Bovatus:30
Bovatus_04862	-1.33	4.45	0.347905	0.771165	ALJ49450.1	Arylsulfatase	EC3.1.6.-		Bovatus:104	Bovatus:107
Bovatus_03712	-1.03	0.25	0.544255	0.874644	ALJ48317.1	Amidohydrolase	NOT DEFINED
Bovatus_00251	1.25	1.34	0.549423	0.875496	ALJ44923.1	dTDP-glucose 4,6-dehydratase	EC4.2.1.46
Bovatus_01346	1.37	2.95	0.537289	0.870757	ALJ45992.1	Inner membrane protein YqjA	EC3.1.3.1
Bovatus_02396	-1.08	1.14	0.555673	0.877122	ALJ47028.1	Aspartate aminotransferase	EC2.6.1.1
Bovatus_02510	-0.93	6.55	0.199699	0.656162	ALJ47135.1	hypothetical protein	Unknown	GH115	Bovatus:45
Bovatus_01052	1.29	4.77	0.421209	0.819866	ALJ45703.1	Tyrosine recombinase XerC	NOT DEFINED
Bovatus_02593	1.31	2.98	0.515503	0.85726	ALJ47218.1	inosine 5'-monophosphate dehydrogenase	EC1.13.12.16
Bovatus_01431	1.33	2.6	0.590844	0.889834	ALJ46075.1	hypothetical protein	EC1.97.1.4
Bovatus_01516	1.35	4.16	0.478222	0.843947	ALJ46160.1	Tyrosine recombinase XerD	NOT DEFINED
Bovatus_00851	-1.36	3.39	0.512622	0.856845	ALJ45509.1	NTE family protein RssA	NOT DEFINED
Bovatus_04860	-1.16	0.53	0.541615	0.873417	ALJ49448.1	Glucokinase	EC2.7.1.2		Bovatus:104	Bovatus:107
Bovatus_03168	1.5	3.12	0.486268	0.843947	ALJ47776.1	Beta-glucuronidase	EC3.2.1.31	GH2
Bovatus_02349	-1.44	3.27	0.54853	0.875449	ALJ46981.1	Bacterial DNA-binding protein	Unknown
Bovatus_00417	1.35	5.09	0.360115	0.778108	ALJ45085.1	Phage capsid family protein	Unknown
Bovatus_01730	-1.27	2.46	0.583212	0.886479	ALJ46371.1	SusD family protein	NOT DEFINED		Bovatus:26	Bovatus:93
Bovatus_03890	0.89	6.52	0.216208	0.677349	ALJ48493.1	Xylose operon regulatory protein	NOT DEFINED
Bovatus_02176	-1.37	3.24	0.557133	0.877122	ALJ46810.1	hypothetical protein	Unknown
Bovatus_04057	-1.36	3.07	0.531111	0.86819	ALJ48652.1	hypothetical protein	Unknown
Bovatus_02243	0.76	6.8	0.156398	0.591141	ALJ46876.1	fec operon regulator FecR	NOT DEFINED			Bovatus:66
Bovatus_01474	1.28	2.5	0.576848	0.886064	ALJ46118.1	Pyridoxamine 5'-phosphate oxidase	Unknown
Bovatus_04204	1.07	0.82	0.577996	0.886479	ALJ48798.1	hypothetical protein	Unknown
Bovatus_04906	-1.29	1.78	0.581614	0.886479	ALJ49494.1	Glycosyl transferase family 11	EC2.4.1.308	GT11
Bovatus_01657	1.39	3.47	0.572495	0.883278	ALJ46301.1	hypothetical protein	Unknown
Bovatus_02270	-1.01	5.52	0.365779	0.781416	ALJ46903.1	hypothetical protein	NOT DEFINED
Bovatus_04121	-1.41	3.52	0.566387	0.881224	ALJ48715.1	site-specific tyrosine recombinase XerC	Unknown
Bovatus_04401	1.2	3.11	0.59502	0.890229	ALJ48994.1	Extracellular endo-alpha-(1->5)-L-arabinanase precursor	EC3.2.1.23	GH43_18-GH43_34-CBM32	Bovatus:97	Bovatus:101
Bovatus_03104	-1.08	0.44	0.541429	0.873417	ALJ47712.1	hypothetical protein	Unknown
Bovatus_00452	-1.49	3.7	0.500973	0.85246	ALJ45120.1	Macrolide export protein MacA	NOT DEFINED
Bovatus_01104	1.15	1.4	0.606445	0.897282	ALJ45755.1	N-acetylmuramoyl-L-alanine amidase	EC3.5.1.28
Bovatus_03501	1.1	0.68	0.573711	0.883278	ALJ48108.1	LicD family protein	EC2.7.8.-
Bovatus_03337	-1.36	4.02	0.46626	0.840444	ALJ47944.1	High-affinity zinc uptake system ATP-binding protein ZnuC	EC3.6.3.-
Bovatus_01729	1.21	1.46	0.578664	0.886479	ALJ46370.1	hypothetical protein	Unknown		Bovatus:26	Bovatus:93
Bovatus_04494	1.3	4.78	0.402712	0.807074	ALJ49087.1	hypothetical protein	EC2.7.11.1
Bovatus_04944	1.2	2	0.587763	0.888124	ALJ49531.1	Endo-beta-N-acetylglucosaminidase F2 precursor	Unknown	GH18	Bovatus:107	Bovatus:110
Bovatus_03686	1.24	6.44	0.205491	0.660648	ALJ48292.1	putative sugar kinase YdjH	EC2.7.1.213
Bovatus_01132	1.38	4.77	0.448384	0.831475	ALJ45783.1	Tyrosine-protein kinase ptk	EC2.7.10.-
Bovatus_00895	1.3	6.27	0.279424	0.722476	ALJ45552.1	Polysaccharide pyruvyl transferase	EC1.3.1.98
Bovatus_02466	-1.12	1.8	0.601872	0.894534	ALJ47091.1	hypothetical protein	NOT DEFINED		Bovatus:44	Bovatus:8
Bovatus_00989	-1.31	4.3	0.493829	0.847679	ALJ45640.1	putative adenylyltransferase/sulfurtransferase MoeZ	EC2.7.7.80
Bovatus_01124	1.29	3.39	0.591414	0.890193	ALJ45775.1	Branched-chain-amino-acid aminotransferase	EC2.6.1.42
Bovatus_01078	1.18	3.39	0.593628	0.890229	ALJ45729.1	hypothetical protein	Unknown
Bovatus_03228	-1.1	0.45	0.56146	0.879233	ALJ47836.1	Putative TrmH family tRNA/rRNA methyltransferase	EC2.1.1.34
Bovatus_00682	1.23	2.55	0.594235	0.890229	ALJ45348.1	hypothetical protein	Unknown
Bovatus_04300	-1.04	0.69	0.578943	0.886479	ALJ48893.1	hypothetical protein
Bovatus_02601	1.34	2.56	0.55397	0.876456	ALJ47226.1	hypothetical protein	Unknown
Bovatus_02812	-1.11	1.13	0.612874	0.89821	ALJ47425.1	Thiol-disulfide oxidoreductase ResA	NOT DEFINED
Bovatus_03497	-1.08	5.39	0.298434	0.733344	ALJ48104.1	Lipopolysaccharide core heptosyltransferase RfaQ	EC2.4.-.-	GT9
Bovatus_03236	1.01	6.33	0.220347	0.678548	ALJ47844.1	hypothetical protein	Unknown		Bovatus:62	Bovatus:56
Bovatus_03847	-0.77	6.91	0.1668	0.605551	ALJ48450.1	hypothetical protein	Unknown		Bovatus:84	Bovatus:77
Bovatus_03530	1.58	4.56	0.419117	0.817844	ALJ48137.1	hypothetical protein	NOT DEFINED
Bovatus_00641	1.26	1.83	0.53258	0.86819	ALJ45307.1	ECF RNA polymerase sigma factor SigW	NOT DEFINED		Bovatus:14	Bovatus:6
Bovatus_04905	-1.19	2.28	0.632135	0.907158	ALJ49493.1	dTDP-fucopyranose mutase	EC5.4.99.9
Bovatus_01846	-1.15	2.63	0.594132	0.890229	ALJ46486.1	hypothetical protein	Unknown
Bovatus_01349	-1.4	3.99	0.434279	0.82435	ALJ45995.1	acid-resistance membrane protein	Unknown
Bovatus_00221	-1.04	0.66	0.570033	0.882391	ALJ44893.1	N-acetylmuramoyl-L-alanine amidase	EC3.5.1.28
Bovatus_03882	-1.3	4.05	0.54609	0.875176	ALJ48485.1	SusD family protein	NOT DEFINED		Bovatus:87	Bovatus:80
Bovatus_04683	1.24	3.16	0.614626	0.898847	ALJ49273.1	Phosphatidate cytidylyltransferase	EC2.7.7.41
Bovatus_00782	-1.05	2.09	0.635735	0.907707	ALJ45444.1	multidrug efflux system subunit MdtA	NOT DEFINED
Bovatus_01865	1.19	1.66	0.60026	0.892859	ALJ46505.1	Free methionine-R-sulfoxide reductase	EC1.8.4.14
Bovatus_03657	-1.05	2.8	0.644758	0.909034	ALJ48263.1	Acyltransferase family protein	Unknown
Bovatus_01873	1.11	2.18	0.63675	0.907707	ALJ46513.1	hypothetical protein	Unknown
Bovatus_01463	0.79	6.85	0.171006	0.613177	ALJ46107.1	TonB dependent receptor	NOT DEFINED		Bovatus:18	Bovatus:13
Bovatus_00193	-1.32	4.58	0.440285	0.825032	ALJ44865.1	putative AAA-ATPase	Unknown
Bovatus_03755	-1.26	2.91	0.595752	0.890229	ALJ48360.1	Fluoroquinolones export ATP-binding protein	NOT DEFINED
Bovatus_02262	-1.04	1.11	0.613891	0.89821	ALJ46895.1	Aminopeptidase S	Unknown
Bovatus_00098	-1.26	5.05	0.324377	0.75375	ALJ44770.1	Histidine biosynthesis bifunctional protein HisB	EC4.2.1.19:EC3.1.3.15
Bovatus_00818	-1.16	2.45	0.634151	0.907312	ALJ45476.1	hypothetical protein	Unknown
Bovatus_00947	1.34	3.49	0.489547	0.845499	ALJ45604.1	FtsX-like permease family protein	NOT DEFINED
Bovatus_04498	-1.14	1.08	0.599462	0.892349	ALJ49091.1	Alpha/beta hydrolase family protein	NOT DEFINED
Bovatus_02564	1.26	4.07	0.479753	0.843947	ALJ47189.1	Beta-galactosidase		GH2
Bovatus_04271	-1.14	5.07	0.360504	0.778108	ALJ48865.1	hypothetical protein	Unknown		Bovatus:94	Bovatus:98
Bovatus_01228	1.2	1.54	0.603238	0.894906	ALJ45879.1	2,3,4,5-tetrahydropyridine-2,6-dicarboxylate N-acetyltransferase	EC2.3.1.79
Bovatus_03640	-1.07	1.02	0.612087	0.898157	ALJ48246.1	hypothetical protein
Bovatus_01120	1.25	3.26	0.557686	0.877122	ALJ45771.1	UDP-Glcalpha-D-GlcNAc-diphosphoundecaprenol beta-1,3-glucosyltransferase WfgD	EC2.4.-.-	GT2
Bovatus_03556	0.87	6.83	0.176753	0.621815	ALJ48163.1	hypothetical protein	Unknown
Bovatus_03913	1.26	1.79	0.557676	0.877122	ALJ48515.1	hypothetical protein	Unknown		Bovatus:89	Bovatus:82
Bovatus_04358	-1.3	3.94	0.555457	0.877122	ALJ48951.1	Pectinesterase A precursor	EC3.1.1.11	CE8	Bovatus:96	Bovatus:100
Bovatus_01103	-1.07	2.56	0.634848	0.907707	ALJ45754.1	hypothetical protein
Bovatus_00150	1.2	3.21	0.595267	0.890229	ALJ44822.1	Outer membrane protein OprM precursor	NOT DEFINED
Bovatus_04380	1.09	2.55	0.654743	0.913328	ALJ48973.1	Polygalacturonase	NOT DEFINED	GH28	Bovatus:96	Bovatus:100
Bovatus_02651	1.24	3.46	0.535978	0.870757	ALJ47276.1	Penicillin-binding protein 1F	EC2.4.1.129	GT51
Bovatus_04824	1.19	2.46	0.639271	0.907707	ALJ49412.1	hypothetical protein	Unknown
Bovatus_02445	-1.31	4.54	0.404878	0.808928	ALJ47071.1	RNA polymerase sigma factor CarQ	NOT DEFINED		Bovatus:43	Bovatus:59
Bovatus_03774	-1.09	1.42	0.610053	0.898155	ALJ48379.1	Glycosyl hydrolases family 43	NOT DEFINED	GH43_19
Bovatus_01591	-1.09	1.42	0.626481	0.904685	ALJ46235.1	hypothetical protein	Unknown
Bovatus_02273	-1.37	4.31	0.464641	0.840444	ALJ46906.1	hypothetical protein	Unknown
Bovatus_01880	-1.3	4.99	0.396604	0.805145	ALJ46520.1	Low specificity L-threonine aldolase	EC4.1.2.48
Bovatus_00966	1.46	4.07	0.461538	0.839004	ALJ45623.1	Thioredoxin-1	NOT DEFINED
Bovatus_02964	-1.09	1.66	0.627301	0.904867	ALJ47573.1	hypothetical protein	Unknown
Bovatus_03079	1.37	4.12	0.524082	0.865067	ALJ47687.1	hypothetical protein	Unknown		Bovatus:55	Bovatus:48
Bovatus_04551	1.01	3.14	0.64456	0.909034	ALJ49142.1	hypothetical protein	Unknown
Bovatus_01934	1.37	3.35	0.516894	0.857909	ALJ46569.1	hypothetical protein	Unknown
Bovatus_04645	-1.22	3.82	0.575849	0.885504	ALJ49236.1	6-phosphogluconolactonase	EC3.1.1.31
Bovatus_00328	-1.05	0.9	0.608067	0.89739	ALJ44999.1	N-acetylmuramoyl-L-alanine amidase	EC3.5.1.28
Bovatus_00597	1.21	4.84	0.45056	0.831802	ALJ45263.1	hypothetical protein	NOT DEFINED	CE	Bovatus:12	Bovatus:86
Bovatus_01481	-0.95	0.7	0.623122	0.904074	ALJ46125.1	hypothetical protein	Unknown
Bovatus_03655	-1.06	3.93	0.632401	0.907206	ALJ48261.1	hypothetical protein	NOT DEFINED	GH125	Bovatus:78	Bovatus:70
Bovatus_03150	1.27	5.1	0.402618	0.807074	ALJ47758.1	Ferric enterobactin receptor precursor	NOT DEFINED		Bovatus:57	Bovatus:51
Bovatus_00635	-1.01	1.75	0.658019	0.913612	ALJ45301.1	hypothetical protein	Unknown
Bovatus_01457	1.2	3.02	0.603118	0.894906	ALJ46101.1	putative TonB-dependent receptor precursor	NOT DEFINED		Bovatus:18	Bovatus:13
Bovatus_01520	-0.98	5.6	0.283614	0.728759	ALJ46164.1	hypothetical protein	Unknown
Bovatus_03025	1.31	4.95	0.392441	0.80085	ALJ47634.1	GDSL-like Lipase/Acylhydrolase	Unknown
Bovatus_00679	1.47	5.02	0.3816	0.796325	ALJ45345.1	Beta-galactosidase	EC3.2.1.23	GH2
Bovatus_04904	1.28	3.13	0.537193	0.870757	ALJ49492.1	Trehalose synthase	EC2.4.1.-	GT4
Bovatus_03115	1.37	3.98	0.544406	0.874644	ALJ47723.1	Fasciclin domain protein	Unknown		Bovatus:56	Bovatus:49
Bovatus_03965	0.8	6.84	0.20653	0.661167	ALJ48562.1	hypothetical protein
Bovatus_01484	1.2	5.47	0.325642	0.755134	ALJ46128.1	Vitamin B12 transporter BtuB	NOT DEFINED		Bovatus:19	Bovatus:14
Bovatus_01517	-0.95	1.09	0.623284	0.904074	ALJ46161.1	hypothetical protein	Unknown
Bovatus_00614	1.08	1.05	0.613146	0.89821	ALJ45280.1	hypothetical protein	Unknown
Bovatus_01986	1.13	2.06	0.64192	0.908714	ALJ46621.1	hypothetical protein	Unknown		Bovatus:30
Bovatus_03448	1.04	2.55	0.654262	0.913328	ALJ48055.1	putative tRNA-dihydrouridine synthase	EC1.-.-.-			Bovatus:36
Bovatus_01405	1.32	4.07	0.421992	0.819957	ALJ46051.1	hypothetical protein	Unknown
Bovatus_03179	-1.06	2.39	0.641213	0.908244	ALJ47787.1	hypothetical protein	NOT DEFINED		Bovatus:59	Bovatus:53
Bovatus_04649	-1.03	0.95	0.604469	0.895435	ALJ49239.1	DNA polymerase IV	EC2.7.7.7
Bovatus_04730	1.26	3.42	0.580411	0.886479	ALJ49319.1	Transposase from transposon Tn916	NOT DEFINED
Bovatus_03615	1.16	4.78	0.416439	0.815897	ALJ48221.1	IPT/TIG domain protein	Unknown		Bovatus:75	Bovatus:35
Bovatus_01780	-0.45	9.38	0.0603522	0.424637	ALJ46420.1	Toxin HigB-2	Unknown
Bovatus_03920	1.1	5.92	0.262363	0.712089	ALJ48522.1	Arylsulfatase precursor	EC3.2.1.23		Bovatus:90	Bovatus:83
Bovatus_01975	-1.24	4.4	0.470537	0.842208	ALJ46610.1	Pyruvate formate-lyase 1-activating enzyme	EC1.97.1.4
Bovatus_01060	-1.24	3.4	0.55495	0.877122	ALJ45711.1	CobQ/CobB/MinD/ParA nucleotide binding domain protein	NOT DEFINED
Bovatus_00081	-1.22	4.31	0.481777	0.843947	ALJ44753.1	ECF RNA polymerase sigma factor RpoE	NOT DEFINED		Bovatus:4	Bovatus:24
Bovatus_01448	-1.04	2.53	0.652571	0.913197	ALJ46092.1	Inner membrane transport protein YdhP	NOT DEFINED
Bovatus_02895	1.1	2.99	0.639398	0.907707	ALJ47505.1	Fatty acid elongase 3-ketoacyl-CoA synthase 1	NOT DEFINED		Bovatus:50	Bovatus:40
Bovatus_03560	-1.13	4.57	0.369079	0.783664	ALJ48166.1	Fimbrillin-A associated anchor proteins Mfa1 and Mfa2	Unknown
Bovatus_02991	0.95	6.62	0.203802	0.659359	ALJ47600.1	hypothetical protein	Unknown			Bovatus:44
Bovatus_01913	0.95	1.07	0.633145	0.907312	ALJ46553.1	3-isopropylmalate dehydrogenase	EC1.1.1.85
Bovatus_01535	-1.06	1.82	0.56694	0.881224	ALJ46179.1	hypothetical protein	Unknown
Bovatus_04873	0.97	1.6	0.656881	0.913612	ALJ49461.1	Capsule biosynthesis protein CapA	NOT DEFINED
Bovatus_01044	1.26	4.76	0.408944	0.81043	ALJ45695.1	Protein translocase subunit SecD	Unknown
Bovatus_00900	0.93	0.7	0.605526	0.896261	ALJ45557.1	site-specific tyrosine recombinase XerC	NOT DEFINED
Bovatus_03612	0.99	2.03	0.681362	0.918818	ALJ48218.1	hypothetical protein	Unknown		Bovatus:75	Bovatus:35
Bovatus_01391	0.95	1.89	0.679649	0.918818	ALJ46037.1	site-specific tyrosine recombinase XerC	NOT DEFINED
Bovatus_01189	1.02	2.46	0.680885	0.918818	ALJ45840.1	hypothetical protein	Unknown
Bovatus_02949	1.27	5.19	0.432335	0.82435	ALJ47558.1	ECF RNA polymerase sigma factor SigK	NOT DEFINED		Bovatus:52	Bovatus:43
Bovatus_03691	-0.85	6.64	0.17809	0.624273	ALJ48296.1	Inositol 2-dehydrogenase	Unknown		Bovatus:80	Bovatus:72
Bovatus_00926	0.99	0.85	0.610535	0.898155	ALJ45583.1	ATP synthase gamma chain	NOT DEFINED
Bovatus_02755	1.27	4.85	0.429827	0.824016	ALJ47373.1	DNA mismatch repair protein MutS	NOT DEFINED
Bovatus_03250	0.91	1.89	0.655112	0.913328	ALJ47858.1	anaerobic benzoate catabolism transcriptional regulator	NOT DEFINED
Bovatus_02955	-0.91	0.23	0.580721	0.886479	ALJ47564.1	Tyrosine recombinase XerD	NOT DEFINED
Bovatus_02308	0.97	1.93	0.645514	0.909034	ALJ46941.1	hypothetical protein	EC3.2.1.81	GH50	Bovatus:39	Bovatus:63
Bovatus_00495	1.02	2.03	0.63433	0.907312	ALJ45162.1	Poly-beta-1,6-N-acetyl-D-glucosamine synthase	NOT DEFINED	GT2
Bovatus_04404	-0.95	2.87	0.690436	0.920924	ALJ48997.1	Exo-poly-alpha-D-galacturonosidase precursor	EC3.2.1.172	GH28	Bovatus:97	Bovatus:101
Bovatus_04680	1.02	1.82	0.633801	0.907312	ALJ49270.1	hypothetical protein	NOT DEFINED
Bovatus_02128	-1.03	1.88	0.652684	0.913197	ALJ46762.1	hypothetical protein	Unknown
Bovatus_01462	1.29	4.22	0.528597	0.867695	ALJ46106.1	SusD family protein	NOT DEFINED		Bovatus:18	Bovatus:13
Bovatus_04150	0.92	1.22	0.664891	0.913612	ALJ48744.1	Helix-turn-helix domain protein	Unknown
Bovatus_01253	0.92	1.79	0.677781	0.918818	ALJ45904.1	hypothetical protein	Unknown
Bovatus_00977	1.28	2.36	0.587491	0.888124	ALJ45628.1	General stress protein 14	NOT DEFINED
Bovatus_03231	-0.96	1.27	0.646758	0.909787	ALJ47839.1	RNA polymerase sigma factor	NOT DEFINED		Bovatus:62	Bovatus:56
Bovatus_01000	1.01	0.8	0.622851	0.904074	ALJ45651.1	Protein phosphatase 2C	EC3.1.3.16
Bovatus_01779	1.27	3.15	0.584938	0.886479	ALJ46419.1	outer membrane channel protein	NOT DEFINED
Bovatus_00643	1.02	1.45	0.65141	0.912721	ALJ45309.1	Creatinine amidohydrolase	EC3.5.2.10		Bovatus:14	Bovatus:6
Bovatus_03692	-1.11	4.13	0.531606	0.86819	ALJ48297.1	hypothetical protein	Unknown		Bovatus:80	Bovatus:72
Bovatus_04922	-0.97	1.64	0.680848	0.918818	ALJ49510.1	Endonuclease MutS2	NOT DEFINED
Bovatus_00008	1.05	1.94	0.649171	0.911594	ALJ44680.1	HTH-type transcriptional activator RhaR	Unknown
Bovatus_01099	-1.31	4.25	0.498911	0.850802	ALJ45750.1	hypothetical protein	Unknown
Bovatus_02303	-1.25	5.73	0.387966	0.798326	ALJ46936.1	Pregnancy-associated plasma protein-A	Unknown
Bovatus_03100	0.98	2.5	0.624725	0.90432	ALJ47708.1	hypothetical protein	Unknown
Bovatus_02887	-1.21	5.52	0.350057	0.771941	ALJ47497.1	Ribokinase	EC2.7.1.15		Bovatus:50	Bovatus:40
Bovatus_04898	-1.18	2.95	0.6188	0.902253	ALJ49486.1	hypothetical protein	Unknown
Bovatus_00957	1.01	1.02	0.644273	0.909034	ALJ45614.1	Uracil permease	NOT DEFINED
Bovatus_04795	0.91	0.8	0.639126	0.907707	ALJ49383.1	hypothetical protein	Unknown
Bovatus_01689	1.17	3.33	0.613937	0.89821	ALJ46330.1	Virulence protein	Unknown
Bovatus_03021	-0.95	2.15	0.655093	0.913328	ALJ47630.1	hypothetical protein	Unknown
Bovatus_00099	-0.94	2.17	0.671706	0.917844	ALJ44771.1	Tyrosine phosphatase family protein	Unknown
Bovatus_04528	-0.97	1.1	0.652533	0.913197	ALJ49119.1	hypothetical protein	Unknown
Bovatus_00440	-1.2	5.07	0.456281	0.836062	ALJ45108.1	hypothetical protein	Unknown
Bovatus_01449	-0.99	1.8	0.660378	0.913612	ALJ46093.1	putative oxidoreductase	Unknown
Bovatus_00686	-0.88	2.25	0.717528	0.92829	ALJ45352.1	Inner membrane protein YjjP	Unknown
Bovatus_01723	1.24	3.98	0.551594	0.876456	ALJ46364.1	Extracellular xylan exo-alpha-(1->2)-glucuronosidase precursor	EC3.2.1.139	GH67	Bovatus:26	Bovatus:93
Bovatus_04434	-1.28	5.78	0.344646	0.769368	ALJ49027.1	SusD family protein	NOT DEFINED		Bovatus:98	Bovatus:102
Bovatus_01630	-1.15	5.43	0.315793	0.74452	ALJ46274.1	NADH pyrophosphatase	EC3.6.1.22
Bovatus_02570	1.33	4.1	0.45312	0.83456	ALJ47195.1	hypothetical protein	Unknown
Bovatus_03252	0.85	2.57	0.715088	0.92829	ALJ47860.1	hypothetical protein	EC2.7.11.1
Bovatus_01499	0.9	1.35	0.688396	0.92051	ALJ46143.1	hypothetical protein	Unknown
Bovatus_01493	-1.37	5.55	0.298624	0.733344	ALJ46137.1	2-oxoglutarate carboxylase small subunit	EC6.4.1.2:EC6.3.4.14
Bovatus_00162	0.62	8.11	0.116556	0.536145	ALJ44834.1	hypothetical protein	Unknown
Bovatus_04217	-0.91	1.37	0.660581	0.913612	ALJ48811.1	hypothetical protein	Unknown
Bovatus_00955	0.96	5.72	0.312017	0.742464	ALJ45612.1	Hydroxylamine reductase	EC1.7.99.1
Bovatus_01521	-0.95	0.74	0.622559	0.904028	ALJ46165.1	hypothetical protein	Unknown
Bovatus_04382	-1.24	4.91	0.297102	0.733289	ALJ48975.1	Beta-xylosidase	EC3.2.1.55	GH43_10-CBM6	Bovatus:96	Bovatus:100
Bovatus_03863	1.12	4.14	0.560916	0.878775	ALJ48466.1	hypothetical protein	EC3.2.1.51	GH95	Bovatus:86	Bovatus:79
Bovatus_04079	0.7	7.72	0.129688	0.557517	ALJ48674.1	lipid A biosynthesis lauroyl acyltransferase	Unknown
Bovatus_01606	1.22	2.2	0.610736	0.898155	ALJ46250.1	GtrA-like protein	Unknown
Bovatus_04016	0.99	6.39	0.266312	0.716042	ALJ48611.1	transport protein TonB	NOT DEFINED
Bovatus_00458	1.08	5.99	0.315729	0.74452	ALJ45126.1	Replication-associated recombination protein A	NOT DEFINED
Bovatus_01625	-1.14	3.65	0.627136	0.904867	ALJ46269.1	Inner membrane protein YkgB	NOT DEFINED
Bovatus_00730	0.76	0.81	0.660185	0.913612	ALJ45395.1	ATPase RavA	EC3.6.3.-
Bovatus_03451	-1.11	6.38	0.230038	0.684513	ALJ48058.1	TonB dependent receptor	NOT DEFINED		Bovatus:71	Bovatus:36
Bovatus_01513	0.95	2.12	0.687674	0.92051	ALJ46157.1	Histidine kinase	EC2.7.13.3
Bovatus_00167	-1.01	3.07	0.694242	0.920924	ALJ44839.1	IPT/TIG domain protein	Unknown		Bovatus:6	Bovatus:31
Bovatus_01680	1.2	4.04	0.554378	0.876607	ALJ46322.1	Choline-sulfatase	EC3.1.6.6
Bovatus_04648	0.9	2.21	0.699299	0.921407	ALJ49238.1	hypothetical protein	Unknown
Bovatus_01550	-1.04	2.93	0.633187	0.907312	ALJ46194.1	Macrolide export ATP-binding/permease protein MacB	NOT DEFINED
Bovatus_04142	0.84	0.34	0.630184	0.905578	ALJ48736.1	hypothetical protein	Unknown
Bovatus_01495	0.84	2.64	0.736341	0.935651	ALJ46139.1	hypothetical protein	Unknown
Bovatus_01113	0.88	1.82	0.69597	0.920924	ALJ45764.1	hypothetical protein	Unknown
Bovatus_04984	-0.84	6.91	0.182889	0.633761	ALJ49569.1	hypothetical protein	Unknown
Bovatus_00406	1.37	4.23	0.490414	0.845499	ALJ45074.1	Transposase from transposon Tn916	NOT DEFINED
Bovatus_02972	-0.46	9.24	0.0630104	0.43321	ALJ47581.1	hypothetical protein
Bovatus_01077	0.92	2.59	0.70871	0.924774	ALJ45728.1	Putative redox-active protein	Unknown
Bovatus_00952	0.82	2.94	0.724957	0.931967	ALJ45609.1	Transcriptional regulatory protein ZraR	NOT DEFINED
Bovatus_00001	-1.1	5.65	0.361861	0.779087	ALJ44673.1	Alginate lyase
Bovatus_02274	0.8	1.03	0.699171	0.921407	ALJ46907.1	hypothetical protein	Unknown
Bovatus_00910	0.79	0.61	0.669189	0.917291	ALJ45567.1	Aspartate/alanine antiporter	NOT DEFINED
Bovatus_00280	-0.83	2.76	0.706221	0.92386	ALJ44952.1	Nuclease precursor	NOT DEFINED
Bovatus_02309	0.84	0.99	0.661883	0.913612	ALJ46942.1	Beta-glucuronidase	EC3.2.1.23	GH2-CBM57	Bovatus:39	Bovatus:63
Bovatus_02623	-1.03	3.6	0.637831	0.907707	ALJ47248.1	Very short patch repair protein	EC3.1.-.-
Bovatus_04235	0.89	1.91	0.703205	0.923031	ALJ48829.1	Modification methylase HindIII	EC2.1.1.72
Bovatus_00382	-0.91	2.13	0.686354	0.919841	ALJ45050.1	Bacteriophage Lambda NinG protein	Unknown
Bovatus_00600	-0.85	1.96	0.714758	0.92829	ALJ45266.1	Putative endoglucanase	Unknown	GH140	Bovatus:12	Bovatus:86
Bovatus_03778	-1.31	5.63	0.286526	0.728759	ALJ48383.1	Alpha-xylosidase	EC3.2.1.177	GH31
Bovatus_03783	1.18	3.65	0.597118	0.891571	ALJ48388.1	hypothetical protein	Unknown	GH145
Bovatus_04163	0.89	1.41	0.698277	0.921302	ALJ48757.1	Type III restriction enzyme, res subunit
Bovatus_00599	-0.85	6.16	0.225395	0.684513	ALJ45265.1	Sialidase B precursor	EC3.2.1.40	GH78-GH33	Bovatus:12	Bovatus:86
Bovatus_00168	0.91	2	0.69547	0.920924	ALJ44840.1	SusD family protein	NOT DEFINED		Bovatus:6	Bovatus:31
Bovatus_00646	-1.15	5.36	0.336605	0.765287	ALJ45312.1	hypothetical protein	Unknown		Bovatus:14	Bovatus:6
Bovatus_03466	-1.2	3.7	0.624339	0.90432	ALJ48073.1	hypothetical protein	Unknown
Bovatus_04352	-1.31	4.71	0.434111	0.82435	ALJ48945.1	Sec-independent protein translocase protein TatCy	NOT DEFINED
Bovatus_03285	-0.93	1.7	0.651224	0.912721	ALJ47893.1	hypothetical protein	Unknown
Bovatus_02524	-1.05	3.52	0.636859	0.907707	ALJ47149.1	hypothetical protein			Bovatus:45
Bovatus_02121	-0.82	1.18	0.691622	0.920924	ALJ46755.1	Acetolactate synthase isozyme 3 small subunit	EC2.2.1.6
Bovatus_04532	0.77	0.18	0.642241	0.908714	ALJ49123.1	GMP synthase	EC6.3.5.2
Bovatus_03745	-1.13	3.4	0.584463	0.886479	ALJ48350.1	N-acetylmuramic acid 6-phosphate etherase	EC4.2.1.126
Bovatus_04741	0.91	2.6	0.691533	0.920924	ALJ49330.1	tRNA modification GTPase MnmE	EC3.6.-.-
Bovatus_04517	-0.96	2.84	0.695985	0.920924	ALJ49110.1	Glycosyl hydrolase family 109 protein 1 precursor	EC1.1.1.371	GH109
Bovatus_00385	0.81	0.56	0.620338	0.902478	ALJ45053.1	hypothetical protein	Unknown
Bovatus_00675	-0.86	0.61	0.638445	0.907707	ALJ45341.1	HTH-type transcriptional activator Btr	EC2.7.1.49:EC2.7.4.7
Bovatus_04122	-0.71	2.96	0.759249	0.941616	ALJ48716.1	Helix-turn-helix domain protein	Unknown
Bovatus_02503	-0.88	0.86	0.659669	0.913612	ALJ47128.1	Transcriptional regulatory protein ZraR	NOT DEFINED
Bovatus_02241	0.71	2.05	0.755825	0.941053	ALJ46874.1	ECF RNA polymerase sigma factor SigW	NOT DEFINED			Bovatus:66
Bovatus_01815	-0.78	1.24	0.682266	0.918976	ALJ46455.1	Pyruvate-flavodoxin oxidoreductase	EC1.2.7.1:EC1.2.7.-
Bovatus_01024	0.79	0.75	0.667341	0.915691	ALJ45675.1	hypothetical protein	Unknown
Bovatus_01340	0.85	1.26	0.683259	0.918976	ALJ45986.1	Phosphate import ATP-binding protein PstB 3	EC3.6.3.27
Bovatus_02565	0.88	3.18	0.720051	0.928425	ALJ47190.1	Beta-galactosidase		GH2
Bovatus_04877	0.8	2.31	0.723538	0.931079	ALJ49465.1	Arabinogalactan endo-1,4-beta-galactosidase precursor	EC3.2.1.89	GH53	Bovatus:105	Bovatus:108
Bovatus_04924	1.28	5.41	0.327881	0.758369	ALJ49511.1	Methionine gamma-lyase	EC2.5.1.49
Bovatus_02487	0.85	1.45	0.708045	0.924372	ALJ47112.1	hypothetical protein	Unknown
Bovatus_04939	0.79	1.34	0.697847	0.921302	ALJ49526.1	Serine/threonine-protein kinase pkn1	EC2.7.11.1	GH33	Bovatus:107	Bovatus:110
Bovatus_04801	-1.18	5.73	0.347032	0.77092	ALJ49389.1	hypothetical protein	Unknown
Bovatus_04879	-1.12	3.85	0.585819	0.886547	ALJ49467.1	SusD family protein	NOT DEFINED		Bovatus:105	Bovatus:108
Bovatus_03308	0.72	0.57	0.689008	0.92051	ALJ47916.1	putative deoxyribonuclease YjjV	EC3.1.21.-
Bovatus_00854	-1.28	5.23	0.385475	0.797871	ALJ45512.1	1,4-alpha-glucan branching enzyme GlgB	EC2.4.1.18	CBM48-GH13_8
Bovatus_00063	0.67	2.14	0.76635	0.943293	ALJ44735.1	Helix-turn-helix domain protein	NOT DEFINED
Bovatus_04322	0.99	6.27	0.250897	0.697407	ALJ48915.1	NADH-quinone oxidoreductase subunit 6	EC1.6.5.3
Bovatus_04485	-0.77	2.23	0.736879	0.935651	ALJ49078.1	tRNA dimethylallyltransferase	EC2.5.1.75
Bovatus_04755	1.14	4.35	0.567171	0.881224	ALJ49344.1	hypothetical protein	Unknown
Bovatus_02443	-0.94	5.79	0.257097	0.705304	ALJ47069.1	SusD family protein	NOT DEFINED		Bovatus:43	Bovatus:59
Bovatus_00685	0.65	3.5	0.770226	0.943665	ALJ45351.1	Inner membrane protein YbjJ	Unknown
Bovatus_01387	-0.82	8.1	0.104352	0.51156	ALJ46033.1	UDP-glucoseundecaprenyl-phosphate glucose-1-phosphate transferase	NOT DEFINED
Bovatus_00360	-1.23	4.3	0.477843	0.843947	ALJ45029.1	hypothetical protein	Unknown
Bovatus_04811	0.74	1.44	0.732599	0.935651	ALJ49399.1	hypothetical protein	Unknown
Bovatus_00224	-0.75	1.56	0.748274	0.939108	ALJ44896.1	hypothetical protein	Unknown
Bovatus_01926	-0.67	1.27	0.756245	0.941276	ALJ46561.1	Regulatory protein SoxS	NOT DEFINED
Bovatus_00736	0.79	0.92	0.663225	0.913612	ALJ45401.1	hypothetical protein	Unknown
Bovatus_03719	0.63	7.22	0.141102	0.577397	ALJ48324.1	Retaining alpha-galactosidase precursor	EC3.2.1.20	GH97	Bovatus:81	Bovatus:73
Bovatus_04208	-1.05	3.11	0.655654	0.913432	ALJ48802.1	hypothetical protein	Unknown
Bovatus_03024	0.73	0.35	0.65195	0.913151	ALJ47633.1	PGL/p-HBAD biosynthesis glycosyltransferase	EC2.4.1.-	GT2
Bovatus_02927	-0.84	0.71	0.678194	0.918818	ALJ47536.1	Mannan endo-1,4-beta-mannosidase precursor	EC3.2.1.78	GH26	Bovatus:52	Bovatus:42
Bovatus_00572	-1.26	4.78	0.500602	0.85246	ALJ45238.1	Susd and RagB outer membrane lipoprotein	Unknown		Bovatus:11	Bovatus:85
Bovatus_03170	-0.86	1.14	0.686696	0.919985	ALJ47778.1	Cupin domain protein	Unknown
Bovatus_00631	0.84	2.57	0.713914	0.92829	ALJ45297.1	Thioldisulfide interchange protein DsbD precursor	EC1.8.1.8
Bovatus_03887	0.77	3.14	0.739718	0.935651	ALJ48490.1	L-rhamnose-proton symporter	NOT DEFINED
Bovatus_00995	0.72	1.63	0.744929	0.937934	ALJ45646.1	hypothetical protein	Unknown
Bovatus_02750	-0.71	3.02	0.772056	0.944207	ALJ47368.1	Imidazolonepropionase	EC3.5.2.7
Bovatus_02538	0.61	1.94	0.801184	0.952852	ALJ47163.1	Carbohydrate acetyl esterase/feruloyl esterase precursor	EC3.2.1.51	CE6-GH95	Bovatus:45
Bovatus_03177	1.15	4.07	0.592701	0.890229	ALJ47785.1	Alpha-xylosidase	EC3.2.1.20	GH31	Bovatus:59	Bovatus:53
Bovatus_03399	0.76	1.17	0.724761	0.931967	ALJ48006.1	SusD family protein	NOT DEFINED		Bovatus:68	Bovatus:16
Bovatus_00622	1.12	3.49	0.559379	0.878308	ALJ45288.1	Outer membrane protein Omp28	Unknown		Bovatus:13	Bovatus:7
Bovatus_04043	-0.71	1.63	0.747062	0.938941	ALJ48638.1	Murein DD-endopeptidase MepM	EC3.4.-.-	CBM50
Bovatus_00783	-0.69	2.26	0.779309	0.947922	ALJ45445.1	multidrug resistance outer membrane protein MdtQ	NOT DEFINED
Bovatus_03697	1.24	4.96	0.434419	0.82435	ALJ48302.1	Glucosamine-6-phosphate deaminase	EC3.5.99.6		Bovatus:80	Bovatus:72
Bovatus_02428	-0.76	0.73	0.695004	0.920924	ALJ47054.1	hypothetical protein	Unknown
Bovatus_00653	0.67	2.52	0.783812	0.948722	ALJ45319.1	D-galactonate transporter	NOT DEFINED		Bovatus:14	Bovatus:6
Bovatus_00218	0.73	2.62	0.746855	0.938941	ALJ44890.1	site-specific tyrosine recombinase XerC	NOT DEFINED
Bovatus_01502	-0.59	1.9	0.800876	0.952852	ALJ46146.1	RNA ligase	Unknown
Bovatus_04610	-1.19	4.05	0.531252	0.86819	ALJ49201.1	SusD family protein	NOT DEFINED		Bovatus:102	Bovatus:105
Bovatus_00840	-0.86	2.5	0.717087	0.92829	ALJ45498.1	hypothetical protein	Unknown
Bovatus_01472	-0.47	1.91	0.834861	0.963892	ALJ46116.1	RteC protein	Unknown
Bovatus_03188	1.05	3.07	0.638117	0.907707	ALJ47796.1	Glycosyl hydrolases family 43	EC3.1.6.1	GH43	Bovatus:60	Bovatus:54
Bovatus_01805	-1.17	4.2	0.54807	0.875449	ALJ46445.1	SusD family protein	NOT DEFINED		Bovatus:28	Bovatus:96
Bovatus_03449	0.88	6.8	0.195544	0.653347	ALJ48056.1	hypothetical protein	Unknown		Bovatus:71	Bovatus:36
Bovatus_02485	-1.21	4.31	0.537567	0.870757	ALJ47110.1	hypothetical protein	Unknown
Bovatus_00245	-0.64	3.27	0.747777	0.938941	ALJ44917.1	hypothetical protein	Unknown
Bovatus_02498	0.55	1.69	0.809067	0.954485	ALJ47123.1	hypothetical protein	Unknown
Bovatus_00003	0.72	0.43	0.69103	0.920924	ALJ44675.1	hypothetical protein	NOT DEFINED
Bovatus_03279	-0.63	1.78	0.780429	0.947922	ALJ47887.1	hypothetical protein	Unknown
Bovatus_01554	-0.95	3.49	0.670121	0.917844	ALJ46198.1	C4-dicarboxylate transport sensor protein DctB	EC2.7.13.3
Bovatus_03403	-0.63	1.6	0.788869	0.949668	ALJ48010.1	ECF RNA polymerase sigma factor SigW	NOT DEFINED		Bovatus:68	Bovatus:16
Bovatus_00361	0.86	3.28	0.719629	0.92829	ALJ45030.1	hypothetical protein	Unknown
Bovatus_03885	0.76	0.39	0.680135	0.918818	ALJ48488.1	Rhamnulokinase	EC2.7.1.5
Bovatus_00075	-1.13	4.08	0.506854	0.853444	ALJ44747.1	Sodium/pantothenate symporter	NOT DEFINED
Bovatus_02923	-0.86	2.59	0.72264	0.930535	ALJ47532.1	Cellobiose 2-epimerase	EC5.1.3.11		Bovatus:52	Bovatus:42
Bovatus_04659	-0.62	2.31	0.794491	0.950059	ALJ49249.1	Methyl-viologen-reducing hydrogenase, delta subunit	EC1.12.99.-
Bovatus_01870	-0.57	1.43	0.783747	0.948722	ALJ46510.1	hypothetical protein	Unknown
Bovatus_02598	0.96	6.86	0.188489	0.641296	ALJ47223.1	Helicase IV	EC3.6.4.12
Bovatus_02081	0.87	6.75	0.185466	0.63812	ALJ46716.1	hypothetical protein	Unknown		Bovatus:34	Bovatus:11
Bovatus_02870	-1.26	5.44	0.390704	0.800226	ALJ47480.1	Inositol-1-monophosphatase	EC3.1.3.25
Bovatus_00610	0.91	3.02	0.676807	0.918818	ALJ45276.1	hypothetical protein	NOT DEFINED
Bovatus_01610	-0.69	3.02	0.770007	0.943665	ALJ46254.1	Sensor protein ZraS	EC2.7.13.3
Bovatus_03051	0.52	1.91	0.814212	0.956266	ALJ47659.1	Endoglucanase precursor	EC3.2.1.4	GH5_5	Bovatus:54	Bovatus:46
Bovatus_02813	1.19	5.44	0.328239	0.758369	ALJ47426.1	thiol-disulfide oxidoreductase	NOT DEFINED
Bovatus_00028	0.61	0.79	0.740038	0.935651	ALJ44700.1	ECF RNA polymerase sigma factor SigE	NOT DEFINED		Bovatus:2	Bovatus:26
Bovatus_00393	-0.6	1.18	0.788695	0.949668	ALJ45061.1	hypothetical protein	Unknown
Bovatus_00019	-0.56	1.87	0.808867	0.954485	ALJ44691.1	Bacterial Ig-like domain (group 2)	EC3.2.1.51		Bovatus:1	Bovatus:27
Bovatus_03742	0.42	2.89	0.856149	0.967515	ALJ48347.1	hypothetical protein	Unknown		Bovatus:81	Bovatus:73
Bovatus_00816	0.77	7.86	0.137078	0.568662	ALJ45474.1	Outer membrane protein assembly factor BamA precursor	NOT DEFINED
Bovatus_03535	-0.48	1.84	0.84098	0.965239	ALJ48142.1	hypothetical protein	Unknown
Bovatus_00925	0.35	1.8	0.882543	0.972538	ALJ45582.1	ATP-dependent DNA helicase UvrD2	EC3.6.4.12
Bovatus_02292	0.67	1.69	0.771089	0.944207	ALJ46925.1	hypothetical protein	EC3.1.4.46		Bovatus:38	Bovatus:64
Bovatus_00494	0.61	0.71	0.736304	0.935651	ALJ45161.1	N-glycosyltransferase	EC2.4.1.336	GT2
Bovatus_03908	-0.63	3.81	0.76637	0.943293	ALJ48510.1	hypothetical protein	NOT DEFINED	GH125	Bovatus:89	Bovatus:82
Bovatus_02271	0.84	3.87	0.688185	0.92051	ALJ46904.1	hypothetical protein	Unknown
Bovatus_00121	0.78	6.96	0.165703	0.604176	ALJ44793.1	hypothetical protein	Unknown
Bovatus_03860	0.58	1.34	0.791992	0.949929	ALJ48463.1	hypothetical protein	Unknown
Bovatus_03324	-0.6	1.31	0.763609	0.941696	ALJ47931.1	hypothetical protein	Unknown
Bovatus_01083	0.59	1.57	0.788643	0.949668	ALJ45734.1	putative transcriptional regulatory protein	Unknown
Bovatus_04244	0.43	2.89	0.855723	0.967515	ALJ48838.1	hypothetical protein	Unknown
Bovatus_03858	-0.67	1.68	0.756517	0.941314	ALJ48461.1	hypothetical protein	NOT DEFINED
Bovatus_03878	1.07	3.94	0.577161	0.886064	ALJ48481.1	hypothetical protein
Bovatus_04867	1.1	5.24	0.51917	0.860955	ALJ49455.1	Cadherin domain protein	Unknown		Bovatus:104	Bovatus:107
Bovatus_02527	-1.1	5.83	0.337454	0.765287	ALJ47152.1	Beta-xylosidase	EC3.2.1.37	GH43_9	Bovatus:45
Bovatus_03857	-0.61	1.35	0.766546	0.943293	ALJ48460.1	Acetyl esterase Axe7A precursor	EC3.1.1.41	CE7	Bovatus:85	Bovatus:78
Bovatus_00372	0.44	2.45	0.851154	0.967515	ALJ45041.1	hypothetical protein	Unknown
Bovatus_04061	1.04	3.91	0.620143	0.902478	ALJ48656.1	hypothetical protein	Unknown
Bovatus_01850	-1.16	4.73	0.525969	0.867084	ALJ46490.1	hypothetical protein	Unknown
Bovatus_00074	-0.4	2.05	0.864893	0.969514	ALJ44746.1	hypothetical protein
Bovatus_03110	-0.44	2.36	0.855473	0.967515	ALJ47718.1	hypothetical protein	Unknown		Bovatus:56	Bovatus:49
Bovatus_01254	-0.96	3.44	0.63971	0.907707	ALJ45905.1	hypothetical protein	Unknown
Bovatus_04855	-0.62	1.64	0.783413	0.948722	ALJ49443.1	H(+)/Cl(-) exchange transporter ClcA	NOT DEFINED
Bovatus_02963	-0.82	2.15	0.684352	0.918976	ALJ47572.1	hypothetical protein	Unknown
Bovatus_00183	0.79	3.49	0.733738	0.935651	ALJ44855.1	RNA polymerase sigma factor	NOT DEFINED		Bovatus:7	Bovatus:32
Bovatus_02105	-0.55	2.75	0.825664	0.961882	ALJ46739.1	hypothetical protein	Unknown
Bovatus_00988	-0.63	2.27	0.787488	0.949646	ALJ45639.1	2-iminoacetate synthase	EC4.1.99.19
Bovatus_02662	1.01	5.47	0.364588	0.781416	ALJ47287.1	fec operon regulator FecR	Unknown		Bovatus:47	Bovatus:30
Bovatus_03003	-0.63	3.13	0.799168	0.952573	ALJ47612.1	hypothetical protein	Unknown		Bovatus:53	Bovatus:44
Bovatus_01459	-0.7	3.45	0.759127	0.941616	ALJ46103.1	hypothetical protein	Unknown		Bovatus:18	Bovatus:13
Bovatus_02191	-1.22	4.34	0.490583	0.845499	ALJ46825.1	Sugar phosphatase YfbT	EC5.4.2.6
Bovatus_01988	0.67	1.42	0.743109	0.936849	ALJ46623.1	TonB-dependent Receptor Plug Domain protein	NOT DEFINED		Bovatus:30	Bovatus:29
Bovatus_02269	-1.13	5.26	0.360611	0.778108	ALJ46902.1	Nucleotidyltransferase domain protein	NOT DEFINED
Bovatus_00187	0.36	3.2	0.881598	0.972538	ALJ44859.1	Alginate lyase	Unknown		Bovatus:7	Bovatus:32
Bovatus_00639	0.47	1.34	0.819234	0.958531	ALJ45305.1	hypothetical protein	EC3.2.1.31	GH141
Bovatus_02183	0.64	0.62	0.747838	0.938941	ALJ46817.1	Solvent efflux pump periplasmic linker SrpA precursor	NOT DEFINED
Bovatus_04361	-1.03	3.28	0.623863	0.90432	ALJ48954.1	hypothetical protein	Unknown		Bovatus:96
Bovatus_02472	0.66	2.51	0.762185	0.941696	ALJ47097.1	hypothetical protein	Unknown
Bovatus_02112	-0.98	3.84	0.660285	0.913612	ALJ46746.1	NADPH dehydrogenase	EC1.3.1.34
Bovatus_04069	-0.57	1.33	0.782895	0.948722	ALJ48664.1	hypothetical protein	Unknown
Bovatus_02506	-0.02	2.06	0.992133	0.999368	ALJ47131.1	Endo-1,4-beta-xylanase A precursor	EC3.2.1.8	GH10	Bovatus:45
Bovatus_00762	-0.2	3.01	0.935568	0.989251	ALJ45424.1	Outer membrane protein OprM precursor	NOT DEFINED
Bovatus_00731	-0.55	0.97	0.769858	0.943665	ALJ45396.1	hypothetical protein	Unknown
Bovatus_04343	0.93	6.07	0.310826	0.742464	ALJ48936.1	Glycosyl hydrolase family 92	Unknown	GH92	Bovatus:95	Bovatus:99
Bovatus_01365	0.58	2.48	0.811206	0.955409	ALJ46011.1	hypothetical protein	Unknown
Bovatus_04647	0.78	2.15	0.716547	0.92829	ALJ49237.1	hypothetical protein	Unknown
Bovatus_03476	-0.77	3.15	0.72679	0.932503	ALJ48083.1	Calcineurin-like phosphoesterase	Unknown		Bovatus:73	Bovatus:37
Bovatus_02706	-0.63	1.17	0.753673	0.940317	ALJ47331.1	Glutaminase 1	EC3.5.1.2
Bovatus_04334	0.11	1.46	0.96202	0.992536	ALJ48927.1	KilA-N domain protein	Unknown		Bovatus:95	Bovatus:99
Bovatus_04333	-0.34	3.8	0.882196	0.972538	ALJ48926.1	Alpha-xylosidase	EC3.2.1.20	GH31	Bovatus:95	Bovatus:99
Bovatus_01563	-0.22	2.47	0.926155	0.986342	ALJ46207.1	Histidinol-phosphatase	EC3.1.3.15
Bovatus_02133	0.22	2.65	0.929354	0.987427	ALJ46767.1	Serine/threonine-protein kinase pkn1	EC2.7.11.1
Bovatus_00282	-1.19	4.82	0.525262	0.86665	ALJ44954.1	MORN repeat variant	Unknown
Bovatus_04317	-1.03	3.91	0.629681	0.905578	ALJ48910.1	NADH-quinone oxidoreductase subunit K	EC1.6.5.3
Bovatus_04661	0.6	1.85	0.763804	0.941696	ALJ49251.1	Anaerobic sulfite reductase subunit A	EC1.12.98.4
Bovatus_03516	-0.02	3.07	0.992945	0.999368	ALJ48123.1	Bacterial DNA-binding protein	Unknown
Bovatus_00249	-0.95	3.22	0.678887	0.918818	ALJ44921.1	Spore coat protein SA	EC2.4.-.-	GT4
Bovatus_01241	0.42	1.03	0.838635	0.964396	ALJ45892.1	HTH-type transcriptional repressor BepR	NOT DEFINED
Bovatus_03574	1.32	4.56	0.43779	0.824697	ALJ48180.1	hypothetical protein	Unknown
Bovatus_04662	0.51	1.35	0.803704	0.953807	ALJ49252.1	Anaerobic sulfite reductase subunit B	EC1.12.98.4
Bovatus_04902	-0.56	1.34	0.793627	0.950059	ALJ49490.1	Polysaccharide pyruvyl transferase	EC1.3.1.98
[truncated: 1,916 more rows]

## Sheet: Table 4a-iii
Supplementary File 4: INSeq analysis of fitness determinants in diet-responsive Bacteroides represented in the defined community as a function of pea fiber, PFABN and SBABN supplementation of the HiSF-LoFV diet (related to Fig. 2).
(a) Summary statistics from linear models of gene fitness during pea fiber supplementation (Experiment 1)
(iii) Bacteroides thetaiotaomicron VPI-5482
Locus_Tag	Log2 fold-change (Pea fiber relative to HiSF-LoFV)	Log 2 average counts	P value	Adjusted P value (BH)	Protein accession number	Protein annotation	EC Annotation	CAZy module	Predicted PUL number	Literature PUL number
BT_0356	-8.51	7.57	9.35911e-13	3.40391e-09	AAO75463.1	aldose 1-epimerase precursor	EC5.1.3.3			BT:7
BT_0355	-6.86	7.73	4.63765e-07	0.000843356	AAO75462.1	Na+/glucose cotransporter	NOT DEFINED			BT:7
BT_1052	-2.02	11.18	1.96347e-06	0.00182883	AAO76159.1	putative anti-sigma factor	Unknown		BT:13	BT:14
BT_1153	-1.51	11.18	2.28875e-06	0.00182883	AAO76260.1	phosphoserine aminotransferase	EC2.6.1.52
BT_2018	8.68	2.69	2.5142e-06	0.00182883	AAO77125.1	conserved hypothetical protein	NOT DEFINED
BT_1765	-2.07	8.96	8.08448e-05	0.0367541	AAO76872.1	levanase precursor (2,6-beta-D-fructofuranosidase)	EC3.2.1.80	GH32	BT:21	BT:22
BT_0174	-2.37	8.9	9.38912e-05	0.0379425	AAO75281.1	conserved hypothetical protein	Unknown
BT_2224	8.2	2.44	3.13681e-05	0.0190143	AAO77331.1	RDD family-like membrane protein	Unknown
BT_4304	-7.94	3.52	4.70595e-05	0.0244508	AAO79409.1	glycoside transferase family 4	EC2.4.1.11	GT4
BT_0325	-1.95	10.43	0.000136238	0.0450453	AAO75432.1	conserved hypothetical protein	Unknown
BT_0238	-5.85	6.71	0.00018896	0.0528652	AAO75345.1	transcriptional regulator	NOT DEFINED
[truncated: 3,626 more rows]

## Sheet: Table 4a-iv
Supplementary File 4: INSeq analysis of fitness determinants in diet-responsive Bacteroides represented in the defined community as a function of pea fiber, PFABN and SBABN supplementation of the HiSF-LoFV diet (related to Fig. 2).
[truncated: 1,994 more rows]

[truncated: 8 more sheets: Table 4b-i, Table 4b-ii, Table 4b-iii, Table 4b-iv, Table 4c-i, Table 4c-ii, Table 4c-iii, Table 4c-iv]
