# Supplementary material for: Microbiota functional activity biosensors for characterizing nutrient metabolism in vivo
Source: eLife. 2021 Mar 8;10:e64478. doi: 10.7554/eLife.64478 (PMC7939548; doi:10.7554/eLife.64478)
Supplement: Supplementary file 5. — (A,B) Results from experiments described in Figure 4. (C) Results from experiments depicted in Figure 5. [file elife-64478-supp5.xlsx]

## Sheet: Table 5a
Supplementary File 5: GC-MS analysis of the mass of monosaccharides bound to the surface of MFABs prior to and after their introduction into gnotobiotic mice (related to Figs. 4 and 5).
(a) Data from experiments described in Figure 4 [Experiment 1; associated with Table S2A (beads recovered 4 hours post gavage from the cecums)]
	Diet group	Input							HiSF-LoFV						HiSF-LoFV + 10% pea fiber						HiSF-LoFV + PFABN						HiSF-LoFV + SBABN						Germ free HiSF-LoFV + 10% pea fiber
	Mouse ID	Input 1	Input 2	Input 3	Input 4	Input 5	Input 6	mean ± SD	2.0	3.2	10.0	17.0	18.0	mean ± SD	1.2	4.0	6.2	12.0	15.0	mean ± SD	1.0	4.2	6.0	7.2	9.2	mean ± SD	3.0	5.0	8.0	13.0	2.2	mean ± SD	7.0	8.2	9.0	14.0	16.0	mean ± SD
Arabinose (pg / bead)	PFABN-coated beads	4.52	4.77	5.02	4.79	4.88	4.88	4.81 ± 0.17	1.83	2.36	2.55	1.45	1.8	2 ± 0.45	0.94	0.96	1.49	1.73	1.03	1.23 ± 0.36	1.58	1.5	1.67	1.86	1.22	1.56 ± 0.24	1.59	1.58	1.8	2.91	1.42	1.86 ± 0.6	5.35	3.99	-	7.72	7.98	6.26 ± 1.92
	SBABN-coated beads	22.77	21.88	20.67	19.58	20.83	20.83	21.09 ± 1.1	13.57	11.19	9.45	11.52	17.36	12.62 ± 3.03	8.1	6.45	7.95	10.12	7.65	8.05 ± 1.33	8.84	7.78	8.04	10.39	10.42	9.09 ± 1.26	8.58	8.86	10.28	9.94	9.09	9.35 ± 0.73	28.48	19.22	-	20.3	27.5	23.87 ± 4.79
	Acetylated control beads	0	0.15	0.15	0.4	0	0	0.12 ± 0.16	0	0.44	4.23	0	0	1.17 ± 2.05	0.29	0.58	0	0.71	0.41	0.32 ± 0.33	0	0.44	1.34	0.38	0	0.52 ± 0.5	0.56	0	0	0.35	0.49	0.18 ± 0.26	0.49	1.48	-	0	0.48	0.61 ± 0.62
Glucose (pg / bead)	PFABN-coated beads	0.69	0.82	0.53	0.54	0.57	0.57	0.62 ± 0.12	0.88	0.52	8.06	0.43	0.4	2.06 ± 3.36	0.27	0.25	0.77	0.4	0.29	0.4 ± 0.21	0.51	0.29	0.47	0.38	0.39	0.41 ± 0.09	0.35	0.43	0.97	0.79	0.36	0.58 ± 0.28	0.42	0.49	-	0.72	0.62	0.57 ± 0.14
	SBABN-coated beads	0	0	0	0.21	0.37	0.37	0.16 ± 0.18	0	0	0	0	0	0 ± 0	0	0	0.58	0	0	0.12 ± 0.26	0	0	0	0	0	0 ± 0	0.56	0	0	0	0.58	0.23 ± 0.31	0	0	-	0	0	0 ± 0
	Acetylated control beads	0.01	0	0	0	0	0	0 ± 0.01	0	0	2.09	0	0	0.52 ± 1.04	0	0.17	0	0	0.2	0.03 ± 0.08	0	0	0	0	0.04	0.04 ± 0.09	0	0	0	0	0	0.01 ± 0.02	0	0	-	0	0	0 ± 0
Mannose (pg / bead)	PFABN-coated beads	0	0	0	0	0	0	0 ± 0	0	0	0	0	0	0 ± 0	0	0	0	0	0	0 ± 0	0	0	0	0	0	0 ± 0	0	0	0	0	0	0 ± 0	0	0	-	0	0	0 ± 0
	SBABN-coated beads	0	0	0	0	0	0	0 ± 0	0	0	0	0	0	0 ± 0	0	0	0	0	0	0 ± 0	0	0	0	0	0	0 ± 0	0	0	0	0	0	0 ± 0	0	0	-	0	0	0 ± 0
	Acetylated control beads	0	0	0	0	0	0	0 ± 0	0	0	0	0	0	0 ± 0	0	0.43	0	0	0	0.09 ± 0.19	0	0	0	0	0	0 ± 0	0	0	0	0	0	0 ± 0	0	0	-	0	0	0 ± 0
Galactose (pg / bead)	PFABN-coated beads	0.92	1.01	1	0.97	1.12	1.12	1.02 ± 0.08	1.09	1.18	1.37	0.82	0.73	1.04 ± 0.26	0.56	0.59	0.89	1.03	0.65	0.74 ± 0.21	0.95	0.87	0.81	1.17	0.79	0.92 ± 0.15	1.04	0.98	1.29	1.54	0.5	1.07 ± 0.39	1.31	1.18	-	1.35	1.89	1.43 ± 0.31
	SBABN-coated beads	2.06	1.95	1.95	1.89	2.21	2.21	2.05 ± 0.14	2.09	1.94	1.4	1.82	2.53	1.95 ± 0.41	1.67	1.37	1.63	2.2	1.44	1.66 ± 0.33	1.57	1.4	1.56	1.96	1.85	1.67 ± 0.23	1.96	1.79	2.32	1.6	1.8	1.89 ± 0.27	2.57	2.1	-	2.1	2.46	2.31 ± 0.24
	Acetylated control beads	0	0	0	0	0	0	0 ± 0	0	0	0	0	0	0 ± 0	0	0.76	0	0	0	0.15 ± 0.34	0	0	0	0	0	0 ± 0	0	0	0	0	0	0 ± 0	0	0	-	0	0	0 ± 0
Rhamnose (pg / bead)	PFABN-coated beads	0	0	0	0	0	0	0 ± 0	0	0	0	0	0	0 ± 0	0	0	0	0	0	0 ± 0	0	0	0	0	0	0 ± 0	0	0	0	0	0	0 ± 0	0	0	-	0	0	0 ± 0
	SBABN-coated beads	0.42	0.41	0.36	0.28	0.46	0.46	0.4 ± 0.07	0.38	0.33	0.23	0.34	0.38	0.33 ± 0.06	0.29	0.25	0.32	0.42	0	0.26 ± 0.16	0.27	0.26	0.27	0.3	0.3	0.28 ± 0.02	0.34	0.28	0	0.28	0.29	0.24 ± 0.14	0.39	0.38	-	0.37	0	0.28 ± 0.19
	Acetylated control beads	0	0	0	0	0	0	0 ± 0	0	0	0	0	0	0 ± 0	0	0.72	0	0	0	0.14 ± 0.32	0	0	0	0	0	0 ± 0	0	0	0	0	0	0 ± 0	0	0	-	0	0	0 ± 0
Xylose (pg / bead)	PFABN-coated beads	1.5	2.43	1.54	1.3	1.58	1.58	1.66 ± 0.39	0.56	0.93	2.63	0.23	0.26	0.92 ± 0.99	0.24	0.16	0.29	0.33	0	0.2 ± 0.13	0.48	0.4	0.43	0.56	0.26	0.43 ± 0.11	1.33	0.39	0.34	0.56	0.27	0.58 ± 0.43	1.55	0.99	-	2.48	1.99	1.75 ± 0.63
	SBABN-coated beads	0	0	0	0	0	0	0 ± 0	0	0	0	0	0	0 ± 0	0	0	0	0.55	0	0.11 ± 0.25	0	0	0	0	0	0 ± 0	0	0	0	0	0	0 ± 0	0	0	-	0	0	0 ± 0
	Acetylated control beads	0	0	0	0	0	0	0 ± 0	0	0	0	0	0	0 ± 0	0	17.88	0	0	0	3.58 ± 8	0	0	0	0	0	0 ± 0	0	0.77	0	0	0	0.15 ± 0.35	0	0	-	0	0	0 ± 0

## Sheet: Table 5b
Supplementary File 5: GC-MS analysis of the mass of monosaccharides bound to the surface of MFABs prior to and after their introduction into gnotobiotic mice (related to Figs. 4 and 5).
(b) Data from experiments described in Figure 4 [Experiment 2; associated with Table S2B (beads recovered 6 hours post gavage from feces)]
	Diet group	Input							HiSF-LoFV						HiSF-LoFV + pea fiber						HiSF-LoFV + PFABN							HiSF-LoFV + SBABN
	Mouse ID	Input 1	Input 2	Input 3	Input 4	Input 5	Input 6	mean ± SD	1.1	3.1	4.1	5.1	11.0	mean ± SD	2.1	8.0	11.12	15.0	17.0	mean ± SD	2.5	7.0	9.0	10.0	13.0	13.5	mean ± SD	1.5	3.5	4.5	5.5	14.0	16.0	mean ± SD
Arabinose (pg / bead)	PFABN-coated beads	1.54	1.36	1.25	1.33	1.44	1.31	1.37 ± 0.1	0.67	0.64	0.73	0.7	0.7	0.69 ± 0.03	0.57	0.57	0.52	0.49	0.55	0.54 ± 0.04	0.58	0.7	0.5	0.61	0.89	0.51	0.63 ± 0.15	0.61	0.57	0.52	0.58	0.52	0.53	0.55 ± 0.04
	Acetylated control beads	0	0	0.04	0	0	0	0.01 ± 0.02	0	0	0	0	0.1	0.02 ± 0.04	0	0	0	0	0	0 ± 0	0	0	0	0	0	0.08	0.01 ± 0.03	0	0	0	0	0	0	0 ± 0
Glucose (pg / bead)	PFABN-coated beads	0.1	0.16	0.22	0.19	0.15	0.07	0.15 ± 0.06	0.11	0.19	0.2	0.13	0.11	0.15 ± 0.05	0.23	0	0.19	0	0.12	0.11 ± 0.1	0.28	0.3	0.23	0.15	0.32	0.1	0.23 ± 0.09	0.25	0.25	0.28	0.24	0.23	0.2	0.24 ± 0.03
	Acetylated control beads	0.15	0.12	0.19	0.06	0.06	0	0.1 ± 0.07	0.1	0	0.07	0	0.18	0.07 ± 0.07	0.16	0.1	0.06	0.25	0	0.11 ± 0.09	0.22	0.08	0	0.1	0.22	0.09	0.12 ± 0.09	0.09	0.21	0	0	0	0.26	0.09 ± 0.12
Mannose (pg / bead)	PFABN-coated beads	0.07	0	0	0	0	0	0.01 ± 0.03	0	0	0	0	0	0 ± 0	0	0	0	0	0	0 ± 0	0.12	0	0	0	0.18	0	0.05 ± 0.08	0.12	0	0	0	0	0	0.02 ± 0.05
	Acetylated control beads	0.08	0	0	0	0	0	0.01 ± 0.03	0	0	0	0	0	0 ± 0	0	0	0	0	0	0 ± 0	0	0	0	0	0	0.09	0.01 ± 0.04	0	0	0	0	0	0	0 ± 0
Galactose (pg / bead)	PFABN-coated beads	0.35	0.72	0.27	0.28	0.28	0.27	0.36 ± 0.18	0.38	0.32	0.42	0.33	0.41	0.37 ± 0.05	0.33	0.31	0.31	0.26	0.35	0.31 ± 0.03	0.37	0.52	0.35	0.44	0.69	0.34	0.45 ± 0.14	0.53	0.44	0.31	0.33	0.37	0.36	0.39 ± 0.08
	Acetylated control beads	0	0.08	0.06	0	0	0	0.02 ± 0.04	0	0	0.08	0	0	0.02 ± 0.03	0	0	0	0	0	0 ± 0	0	0	0	0	0.08	0.11	0.03 ± 0.05	0	0	0	0	0	0.12	0.02 ± 0.05
Rhamnose (pg / bead)	PFABN-coated beads	0	0	0	0	0	0	0 ± 0	0	0	0	0	0	0 ± 0	0	0	0	0	0	0 ± 0	0	0	0	0	0	0	0 ± 0	0	0	0	0	0	0	0 ± 0
	Acetylated control beads	0	0	0	0	0	0	0 ± 0	0	0	0	0	0	0 ± 0	0	0	0	0	0	0 ± 0	0	0	0	0	0	0	0 ± 0	0	0	0	0	0	0	0 ± 0
Xylose (pg / bead)	PFABN-coated beads	0.6	0.33	0.31	0.31	0.35	0.28	0.36 ± 0.12	0.09	0	0.09	0	0	0.04 ± 0.05	0.08	0	0.06	0	0.08	0.05 ± 0.04	0.19	0.22	0.11	0.15	1.21	0.07	0.33 ± 0.44	0.39	0	0.67	0.19	0	0	0.21 ± 0.27
	Acetylated control beads	0.09	0.17	0.25	0.11	0.06	0.07	0.13 ± 0.07	0.13	0.2	0.06	0.1	0.23	0.15 ± 0.07	0.12	0.08	0.09	0	0	0.06 ± 0.05	0.35	0.09	0	0.29	0.29	0.23	0.21 ± 0.14	0	0.19	0	0	0.15	0.28	0.1 ± 0.12

## Sheet: Table 5c
Supplementary File 5: GC-MS analysis of the mass of monosaccharides bound to the surface of MFABs prior to and after their introduction into gnotobiotic mice (related to Figs. 4 and 5).
(c) Data from experiments described in Figure 5 [Experiment 3; associated with Table S2C (beads recovered 4 hours post gavage from the cecums)]
	Diet group	Input beads							HiSF-LoFV									HiSF-LoFV + 10% pea fiber
	Mouse ID	Input 1	Input 2	Input 3	Input 4	Input 5	Input 6	mean ± SD	01.0	02.0	03.0	04.0	05.0	06.0	07.0	08.0	mean ± SD	09.0	10.0	11.0	13.0	14.0	15.0	16.0	mean ± SD
Arabinose (pg / bead)	PFABN-coated beads	3.2	2.78	2.73	2.51	2.54	2.95	2.78 ± 0.26	1.88	1.93	1.71	1.61	1.74	2.13	2.05	1.64	1.84 ± 0.19	1.21	1.24	1.16	1.08	1.49	1.39	1.44	1.29 ± 0.15
	GlcMan-coated beads	0.09	0.14	0.15	0.17	0	0.15	0.12 ± 0.06	0.19	0.18	0.16	-	0.11	0.21	0.16	0.22	0.18 ± 0.04	0.16	0.22	-	-	0.16	0.14	0.15	0.17 ± 0.03
	PFABN & GlcMan-coated beads	2.68	2.31	2.44	2.18	2.58	2.87	2.51 ± 0.25	1.85	2.51	2.42	-	2.58	1.87	2.31	2.31	2.26 ± 0.29	1.48	1.61	-	-	1.31	1.56	1.72	1.54 ± 0.15
	Acetylated control beads	0.03	0.06	0.06	0.02	0	0.12	0.05 ± 0.04	0	0.03	0	0	0.02	0.06	0	0.08	0.02 ± 0.03	0.07	0.07	0.07	-	0.05	0.06	0.06	0.06 ± 0.01
Glucose (pg / bead)	PFABN-coated beads	0.46	0.34	0.25	0.31	0.32	0.58	0.38 ± 0.12	0.16	0.4	0.3	0.47	1.22	0.54	0.54	0.35	0.5 ± 0.32	0.24	0.25	0.35	0.25	0.58	0.44	0.47	0.37 ± 0.13
	GlcMan-coated beads	0.88	0.85	1.3	2.02	0.96	1.19	1.2 ± 0.44	0.63	0.69	0.58	-	0.31	0.55	0.56	0.55	0.55 ± 0.12	0.63	0.62	-	-	1.69	1.28	0.56	0.96 ± 0.5
	PFABN & GlcMan-coated beads	0.95	0.61	0.79	0.65	0.72	0.79	0.75 ± 0.12	0.58	0.51	0.78	-	1.49	0.47	0.46	0.55	0.69 ± 0.37	0.34	0.39	-	-	0.74	0.41	0.44	0.46 ± 0.16
	Acetylated control beads	0.18	0.44	0.21	0.16	0.12	0.41	0.26 ± 0.14	0.25	0.21	0.06	0.11	0.05	0.15	0.16	0.18	0.15 ± 0.07	0.08	0.18	0.28	-	0.95	0.11	0.17	0.3 ± 0.33
Mannose (pg / bead)	PFABN-coated beads	0.08	0	0	0	0	0.12	0.03 ± 0.05	0	0	0	0	0.12	0.16	0	0.08	0.04 ± 0.07	0	0	0	0	0	0.56	0.36	0.13 ± 0.23
	GlcMan-coated beads	1.06	1.12	1.42	1.35	1.19	1.27	1.24 ± 0.14	0.5	0.53	0.48	-	0.35	0.49	0.55	0.5	0.49 ± 0.06	0.47	0.46	-	-	0.54	0.64	0.42	0.5 ± 0.09
	PFABN & GlcMan-coated beads	0.9	0.66	0.85	0.69	0.72	0.83	0.78 ± 0.1	0.53	0.47	0.53	-	0.55	0.41	0.41	0.45	0.48 ± 0.06	0.36	0.33	-	-	0.45	0.32	0.35	0.36 ± 0.05
	Acetylated control beads	0	0	0	0.03	0	0.21	0.04 ± 0.08	0	0	0	0	0	0	0	0	0 ± 0	0	0	0	-	0	0	0	0 ± 0
Galactose (pg / bead)	PFABN-coated beads	0.44	0.42	0.43	0.36	0.35	0.43	0.4 ± 0.04	0.36	0.47	0.41	0.45	0.53	0.61	0.53	0.39	0.47 ± 0.08	0.41	0.36	0.37	0.38	0.51	0.54	1.41	0.57 ± 0.38
	GlcMan-coated beads	0.23	0.25	0.32	0.29	0.25	0.3	0.27 ± 0.04	0.4	0.37	0.32	-	0.27	0.71	0.36	0.4	0.4 ± 0.14	0.35	0.35	-	-	0.34	0.31	0.32	0.33 ± 0.02
	PFABN & GlcMan-coated beads	0.54	0.45	0.51	0.43	0.51	0.56	0.5 ± 0.05	0.49	0.59	0.55	-	0.65	0.47	0.52	0.53	0.54 ± 0.06	0.33	0.39	-	-	0.35	0.36	0.37	0.36 ± 0.02
	Acetylated control beads	0	0	0	0.21	0	0	0.03 ± 0.09	0	0	0	0	0	0	0	0	0 ± 0	0	0	0.23	-	0	0	0	0.04 ± 0.09
Rhamnose (pg / bead)	PFABN-coated beads	0.18	0	0.08	0.15	0.15	0.25	0.14 ± 0.09	0	0	0	0	0	0	0	0	0 ± 0	0	0	0	0	0	0	0	0 ± 0
	GlcMan-coated beads	0	0	0	0	0	0	0 ± 0	0	0	0	-	0	0	0	0	0 ± 0	0	0	-	-	0	0	0	0 ± 0
	PFABN & GlcMan-coated beads	0	0	0	0	0	0	0 ± 0	0	0	0	-	0	0	0	0	0 ± 0	0	0	-	-	0	0	0	0 ± 0
	Acetylated control beads	0	0	0	0	0	0	0 ± 0	0	0	0	0	0	0	0	0	0 ± 0	0	0	0	-	0	0	0	0 ± 0
Xylose (pg / bead)	PFABN-coated beads	0.66	0.64	0.54	0.39	0.38	0.89	0.58 ± 0.19	0.16	0.39	0.26	0.47	0.31	0.75	0.38	0.32	0.38 ± 0.17	0.31	0.12	0.46	0.46	0.44	0.41	0.4	0.37 ± 0.12
	GlcMan-coated beads	0.24	0.15	0.42	1.77	0	0.66	0.54 ± 0.65	0.54	0.34	0.39	-	0	0.26	0.12	0.13	0.25 ± 0.18	0.4	0.45	-	-	0.41	0.83	0.37	0.49 ± 0.19
	PFABN & GlcMan-coated beads	0.37	0.32	0.48	0.29	0.41	0.44	0.39 ± 0.07	0	0	0.66	-	0.34	0.2	0.31	0.8	0.33 ± 0.31	0	0.12	-	-	0.5	0	0.17	0.16 ± 0.2
	Acetylated control beads	0.13	0.15	0.68	0.22	0.07	0.5	0.29 ± 0.24	0.26	0.18	0	0.11	0	0.21	0.19	0.19	0.14 ± 0.1	0.2	0.21	0.39	-	0.32	0.24	0.2	0.26 ± 0.08
Two-way ANOVA
Polysaccharide utilization during colocalization on a bead surface (Related to Figure 5D).
Monosaccharide = Mannose			Monosaccharide = Arabinose
Source of variation	% total of variation	P-value	Source of variation	% total of variation	P-value
Interaction	13.03	0.007	Interaction	1.56	0.15
Diet group	8.87	0.02	Diet group	50.56	<0.0001
Bead type	49.06	<0.0001	Bead type	31.2	<0.0001
